# Supplementary material for: Computational genomics insights into cold acclimation in wheat
Source: Frontiers journal article supplement (doi:10.3389/fgene.2022.1015673), 2022-10-20
Supplement: Data_Sheet_1.PDF [file Data_Sheet_1.PDF]

## Supplementary Figures & Tables

A

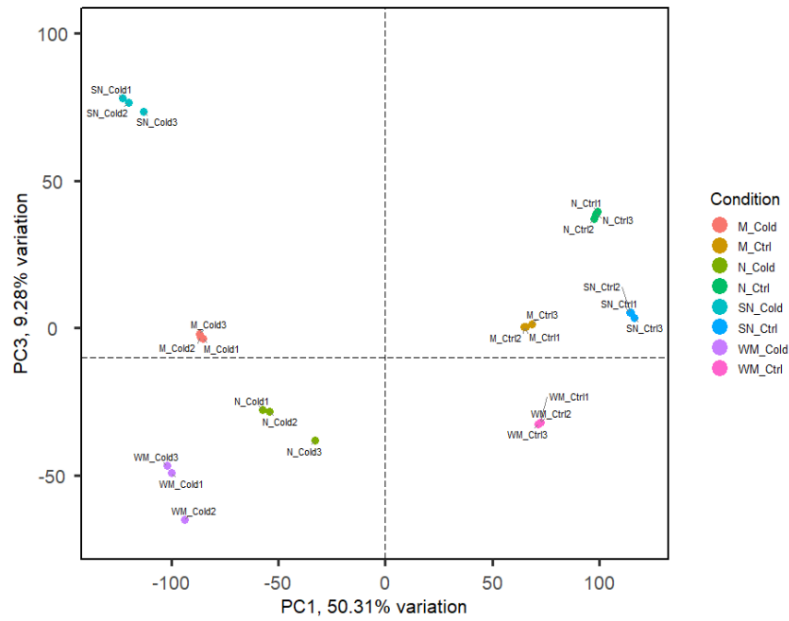

B

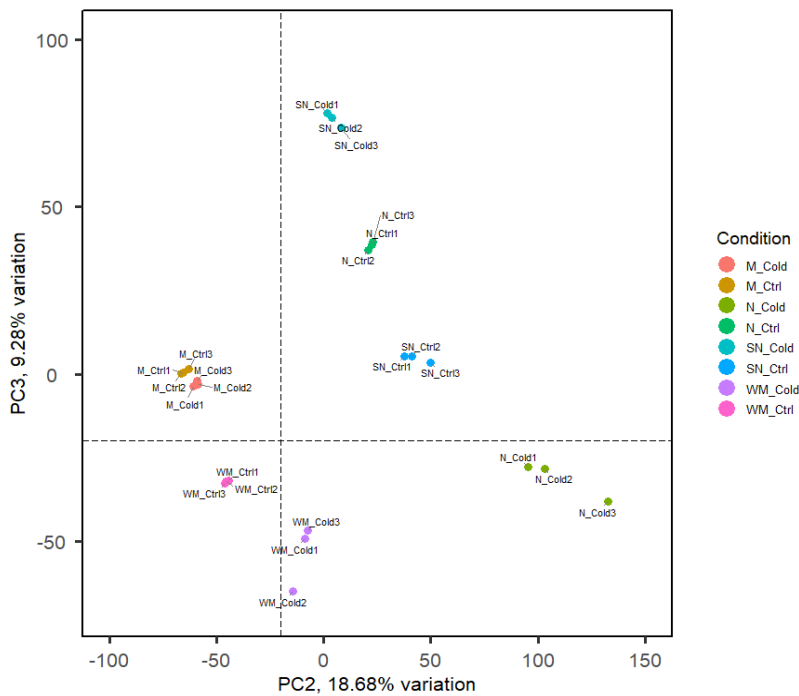

**Supplementary Figure S1.** The third principal component (PC3) separates winter-habit genotypes from the spring-habit ones in each pair of the NILs when treated with cold. (A) PC3 vs PC1, (B) PC3 vs PC2.

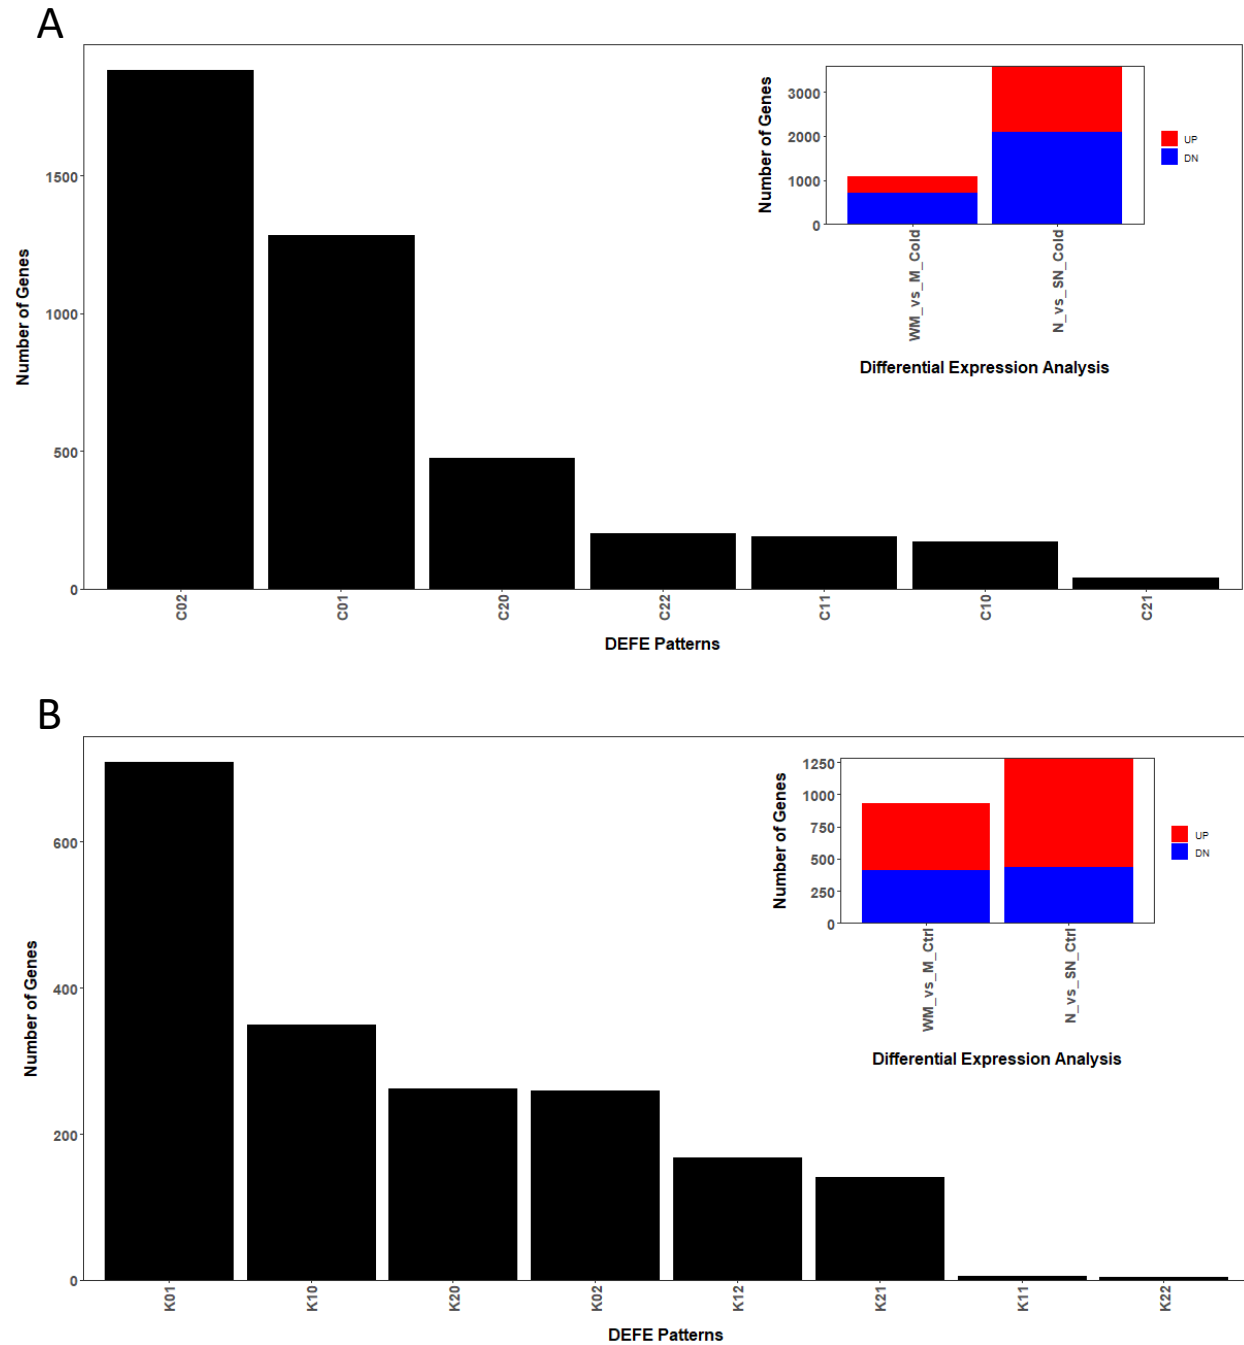

**Supplementary Figure S2.** Frequency distribution of DEGs presented by DEFE patterns of the two pairs of NILs between winter-habit and spring-habit genotypes. (A) C series: cold-treated samples; (B) K series: control samples.

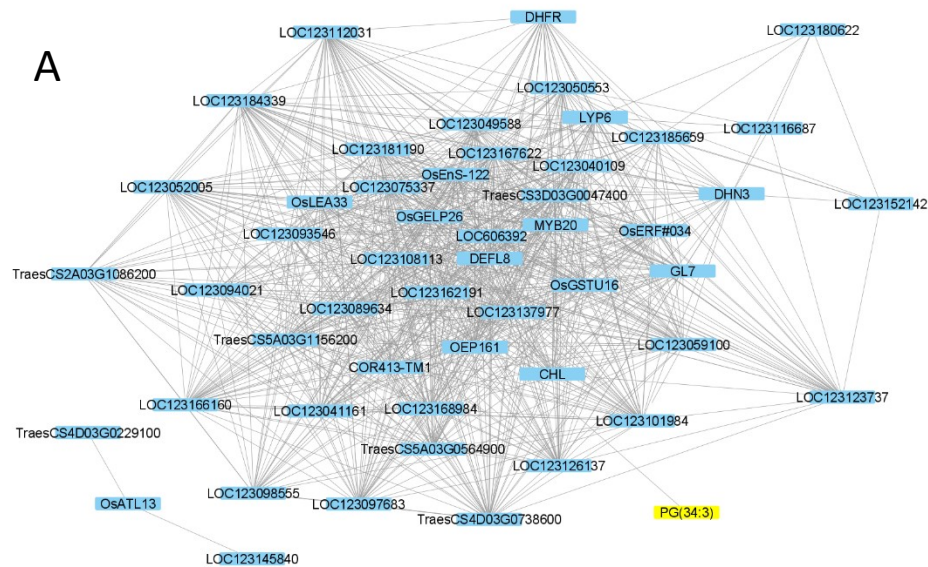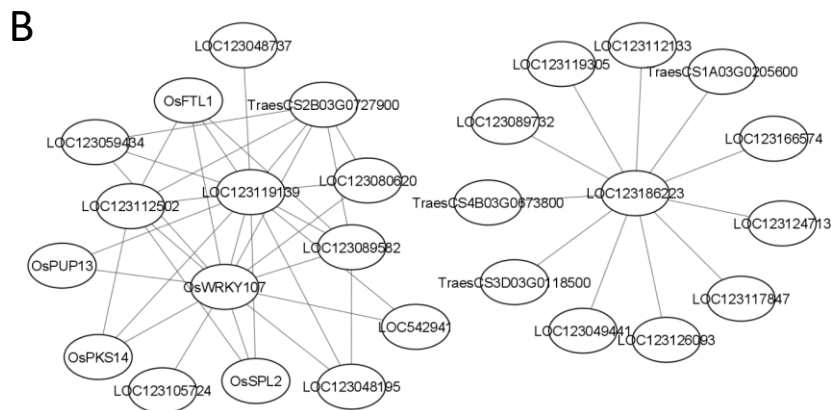

**Supplementary Figure S3.** Contrast in network association strength: (A) winter-habit genes were generally well associated within the group; (B) less than half of the spring-habit genes were loosely associated with another gene in the group.

A

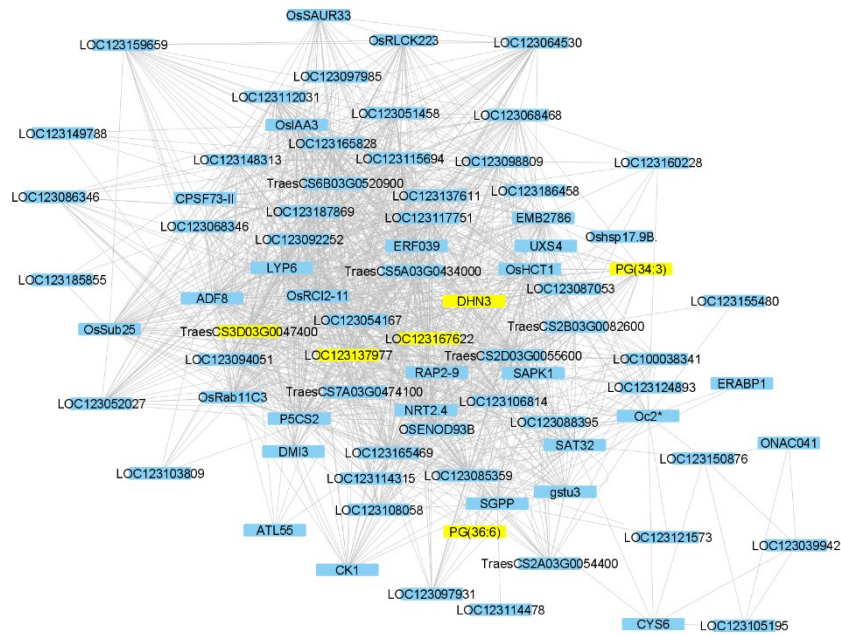

B

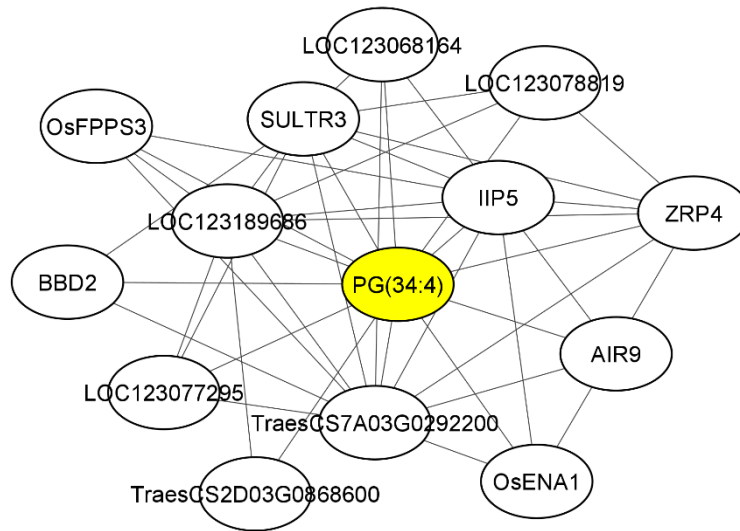

**Supplementary Figure S4.** Contrast between cold hardy and anti-hardy genes in network association perspective: (A) cold hardy genes were generally well associated within the group, the four winter-habit genes and PG(34:3) and PG(36:6) are highlighted; (B) only 1/3 of the anti-hardy genes were loosely associated with another gene.

**Supplementary Table S1.** Range of PC scores of the genes up- or down-regulated by specific to winter-habit or spring-habit genotypes

|                      |     | PC1     | PC2     | PC3     |
|----------------------|-----|---------|---------|---------|
| Up in winter-habit   | Max | -0.0020 | 0.0335  | -0.0026 |
| P0101∩C11∩K00        | Min | -0.0143 | 0.0024  | -0.0437 |
| Up in spring-habit   | Max | -0.0053 | 0.0001  | 0.0325  |
| P1010∩C22∩K00        | Min | -0.0201 | -0.0338 | -0.0072 |
| Down in winter-habit | Max | 0.0128  | -0.0093 | 0.0264  |
| P0202∩C22∩K00        | Min | 0.0021  | -0.0192 | 0.0035  |
| Down in spring-habit | Max | 0.0135  | 0.0094  | -0.0039 |
| P2020∩C11∩K00        | Min | 0.0069  | 0.0091  | -0.0087 |
