# Supplementary material for: Computational genomics insights into cold acclimation in wheat
Source: Front Genet. 2022 Oct 20;13:1015673. doi: 10.3389/fgene.2022.1015673 (PMC9632429; doi:10.3389/fgene.2022.1015673)
Supplement: Supplementary file 2 [file Table2.XLSX]

## Sheet: Summary
Supplementary File S2 | GO enrichment analyses for the genes uniquely up or down regulated by cold in one or all genotypes
	DEFE -->		P0001	P0010	P0100	P1000	P0002	P0020	P0200	P2000	P1111	P2222
	number of genes in the list -->		1484	2036	308	450	672	884	503	187	722	313
	number of genes with a GO term -->		1102	1587	234	375	463	689	353	127	566	231
GO ID	Description	Total Genes	N-up	SN-up	WM-up	M-up	N-down	SN-down	WM-down	M-down	All-up	All-down
GO:0006464	cellular protein modification process	7436		6.985e-54			0.005613
GO:0036211	protein modification process	7436		6.985e-54			0.005613
GO:0043412	macromolecule modification	7831		1.323e-48			0.01
GO:0030001	metal ion transport	729		2.416e-09			0.0006744
GO:0044238	primary metabolic process	21331		1.321e-07			0.002436				0.03
GO:0006563	L-serine metabolic process	74	1.38e-06					0.03
GO:0009070	serine family amino acid biosynthetic process	78	2.162e-06					0.03
GO:0044281	small molecule metabolic process	3180	2.334e-06					0.0005525				0.001999
GO:0009620	response to fungus	127		3.1e-06					0.02		5.696e-07
GO:1901701	cellular response to oxygen-containing compound	249		6.867e-06					0.03
GO:0007154	cell communication	1826		1.102e-05			0.004981
GO:0010033	response to organic substance	1169		1.234e-05			0.03			0.05
GO:0065003	protein-containing complex assembly	913	1.808e-05					0.02
GO:0006812	cation transport	1225		1.97e-05			0.02				0.01
GO:0044283	small molecule biosynthetic process	1101	2.123e-05					0.001464			0.001963	0.0006543
GO:0062012	regulation of small molecule metabolic process	57		2.486e-05			0.00525
GO:0019752	carboxylic acid metabolic process	1916	3.979e-05					0.003447			0.003101
GO:0009753	response to jasmonic acid	61		4.114e-05					0.03		0.01
GO:0070542	response to fatty acid	62		4.636e-05					0.03		0.01
GO:0033993	response to lipid	399		4.946e-05					0.01	0.004771
GO:0043436	oxoacid metabolic process	1934	5.029e-05					0.00393			0.003501	0.04
GO:0006520	cellular amino acid metabolic process	1067	6.088e-05					0.000418			0.0005551	0.02
GO:0042762	regulation of sulfur metabolic process	21		6.276e-05			0.0073
GO:0043933	protein-containing complex subunit organization	1005	0.0001052					0.01
GO:0006811	ion transport	1564		0.0001062			0.00419				0.008282
GO:0034622	cellular protein-containing complex assembly	841	0.0001519					0.01
GO:0050832	defense response to fungus	115		0.0001663					0.02		2.447e-07
GO:0009415	response to water	308	0.0002089					0.02		0.02	0.002472
GO:0009414	response to water deprivation	274	0.0002301					0.01		0.01
GO:0001101	response to acid chemical	312	0.0002383					0.03		0.02	0.002674
GO:1901668	regulation of superoxide dismutase activity	9	0.0002441						0.0007684
GO:1901671	positive regulation of superoxide dismutase activity	9	0.0002441						0.0007684
GO:0034599	cellular response to oxidative stress	39	0.0002508					0.05
GO:0055085	transmembrane transport	3222		0.0004674		8.418e-05	0.003171		0.005366		6.02e-07
GO:1900376	regulation of secondary metabolite biosynthetic process	8		0.0004801			0.001026
GO:0009116	nucleoside metabolic process	96	0.0005362						0.01
GO:0016053	organic acid biosynthetic process	872	0.0006021					0.007257			0.0003939	0.005784
GO:0002229	defense response to oomycetes	50		0.0006171			0.04
GO:0002239	response to oomycetes	50		0.0006171			0.04
GO:1901657	glycosyl compound metabolic process	99	0.000645						0.01
GO:0071805	potassium ion transmembrane transport	115		0.0007536			0.03
GO:0006656	phosphatidylcholine biosynthetic process	13	0.0007957					0.006072
GO:0046653	tetrahydrofolate metabolic process	29	0.0008025					0.03
GO:0006749	glutathione metabolic process	399	2.418e-06	0.002274	0.0002731				0.04		0.000252
GO:0006351	transcription, DNA-templated	1683			0.0008679					0.0001379
GO:0097659	nucleic acid-templated transcription	1685			0.0008778					0.0001393
GO:0046395	carboxylic acid catabolic process	203	0.0008828				0.04				5.659e-08
GO:0032774	RNA biosynthetic process	1692			0.000913					0.0001444
GO:0009058	biosynthetic process	7451	0.0009159					3.338e-08		0.02
GO:0040008	regulation of growth	171		0.001065			0.02
GO:0046394	carboxylic acid biosynthetic process	812	0.001076					0.003756			0.003763	0.003805
GO:0071103	DNA conformation change	367	0.001168					0.0006431
GO:0005975	carbohydrate metabolic process	2685	0.002297			9.346e-05	0.0006775	0.02	1.236e-05		3.638e-21	3.123e-05
GO:0051353	positive regulation of oxidoreductase activity	15	0.001239						0.0022
GO:0043455	regulation of secondary metabolic process	23		0.001253			0.008724
GO:0048367	shoot system development	262		0.001465					0.008116
GO:0006536	glutamate metabolic process	34	0.001479				0.02
GO:0044275	cellular carbohydrate catabolic process	100				0.001616		0.01		0.01
GO:0006575	cellular modified amino acid metabolic process	464	3.548e-08	0.004989	0.0001133			0.03			6.068e-05
GO:1901576	organic substance biosynthetic process	7032	0.001799					1.397e-09		0.01
GO:0044282	small molecule catabolic process	302	0.001821							0.01	3.807e-06
GO:0031497	chromatin assembly	263	0.001866					3.607e-05
GO:1901607	alpha-amino acid biosynthetic process	303	0.001872					0.0005373				0.01
GO:0019222	regulation of metabolic process	5424		0.001889						0.0001031
GO:0006721	terpenoid metabolic process	173			0.002155	0.001817				0.03
GO:0031323	regulation of cellular metabolic process	5099		0.002093						0.0001225
GO:0042430	indole-containing compound metabolic process	86		0.002277				0.001184
GO:0006333	chromatin assembly or disassembly	270	0.002288					4.573e-05
GO:0051341	regulation of oxidoreductase activity	19	0.002526						0.003539
GO:0000303	response to superoxide	19	0.002526					0.01
GO:0000305	response to oxygen radical	19	0.002526					0.01
GO:0019430	removal of superoxide radicals	19	0.002526					0.01
GO:0034614	cellular response to reactive oxygen species	19	0.002526					0.01
GO:0071450	cellular response to oxygen radical	19	0.002526					0.01
GO:0071451	cellular response to superoxide	19	0.002526					0.01
GO:0071396	cellular response to lipid	192		0.002662					0.01	0.04
GO:0009628	response to abiotic stimulus	1079	0.002908					2.825e-05		0.002429	0.003737
GO:0009737	response to abscisic acid	284		0.00306					0.05	0.001411
GO:0097305	response to alcohol	284		0.00306					0.05	0.001411
GO:0044249	cellular biosynthetic process	6840	0.003178					8.647e-09		0.01
GO:0006542	glutamine biosynthetic process	15		0.003494				0.0003175
GO:1901700	response to oxygen-containing compound	819	0.0005448	2.901e-06	0.01				0.005697	0.000501	0.004054
GO:0006323	DNA packaging	286	0.003544					7.651e-05
GO:0042026	protein refolding	43	0.003549							0.002424
GO:0061640	cytoskeleton-dependent cytokinesis	18				0.003574				0.03	0.007932
GO:0006796	phosphate-containing compound metabolic process	6989		4.827e-52	0.001777	0.009192	0.003398
GO:0016310	phosphorylation	5575		4.154e-67	0.008137	0.002903	0.001085
GO:0043603	cellular amide metabolic process	2353	0.003832					1.498e-15
GO:0006793	phosphorus metabolic process	7010		9.551e-52	0.00187	0.00969	0.003629
GO:0006468	protein phosphorylation	5255		4.313e-71	0.01	0.001707	0.001477
GO:0018130	heterocycle biosynthetic process	2659			0.004146					0.0001641
GO:0005984	disaccharide metabolic process	130				0.004167	0.05
GO:0006334	nucleosome assembly	252	0.004267					2.443e-05
GO:0008652	cellular amino acid biosynthetic process	338	0.004508					0.001229				0.0006562
GO:0006355	regulation of transcription, DNA-templated	4287		5.076e-05	0.01					0.0001047
GO:1903506	regulation of nucleic acid-templated transcription	4290		5.232e-05	0.01					0.0001057
GO:2001141	regulation of RNA biosynthetic process	4290		5.232e-05	0.01					0.0001057
GO:0042221	response to chemical	1733	0.009639	0.0007433					0.04	0.009234
GO:1901566	organonitrogen compound biosynthetic process	3496	0.005331					1.311e-16
GO:0034728	nucleosome organization	261	0.005435					3.365e-05
GO:0010817	regulation of hormone levels	144				0.005971			0.03
GO:0006518	peptide metabolic process	2184	0.006073					1.934e-15
GO:0016101	diterpenoid metabolic process	38			0.006251					0.001898
GO:0006970	response to osmotic stress	249		0.006946				0.03		0.0008696	0.01
GO:0006813	potassium ion transport	160		0.007035			0.003206
GO:0051276	chromosome organization	592	0.007057					0.02
GO:0009765	photosynthesis, light harvesting	99		0.004995		0.01		3.485e-07			0.04
GO:0006596	polyamine biosynthetic process	53	0.00751						0.03
GO:0006801	superoxide metabolic process	28	0.007747					0.03
GO:0006595	polyamine metabolic process	55	0.008549						0.03
GO:0065004	protein-DNA complex assembly	328	0.009548					0.0002517
GO:0006338	chromatin remodeling	298	0.01					0.0001099
GO:0034654	nucleobase-containing compound biosynthetic process	2248			0.01					0.0001142
GO:0071824	protein-DNA complex subunit organization	338	0.01					0.0003246
GO:0090698	post-embryonic plant morphogenesis	68		0.01					0.00406
GO:0006950	response to stress	3133	0.01					0.00583			0.02
GO:0006576	cellular biogenic amine metabolic process	162	0.01					0.02
GO:0009084	glutamine family amino acid biosynthetic process	63		0.01				0.02
GO:0044106	cellular amine metabolic process	162	0.01					0.02
GO:0006066	alcohol metabolic process	159			0.01					0.03
GO:0009308	amine metabolic process	245	0.01					0.03
GO:0048827	phyllome development	145		0.01					0.03
GO:0019725	cellular homeostasis	474	0.01							0.05		5.966e-17
GO:0044237	cellular metabolic process	20463		3.888e-05	0.02			0.000156
GO:0051252	regulation of RNA metabolic process	4387		6.159e-05	0.02					0.0001411
GO:0019219	regulation of nucleobase-containing compound metabolic process	4433		9.618e-05	0.02					0.0001613
GO:0009072	aromatic amino acid family metabolic process	214	0.01	0.02				0.05			0.0002364
GO:0050789	regulation of biological process	7510		1.873e-05	0.03					1.641e-05		0.02
GO:0031326	regulation of cellular biosynthetic process	4599		9.925e-05	0.03					8.742e-05
GO:0009889	regulation of biosynthetic process	4605		0.000105	0.03					8.898e-05
GO:0010468	regulation of gene expression	4846		0.0002095	0.03					0.0001763
GO:2000112	regulation of cellular macromolecule biosynthetic process	4546		0.0003864	0.03					7.465e-05
GO:0010556	regulation of macromolecule biosynthetic process	4551		0.0004033	0.03					7.578e-05
GO:0010035	response to inorganic substance	519	1.126e-05	0.03	0.02			0.0001082		0.01	1.176e-05
GO:0008299	isoprenoid biosynthetic process	229	0.02		0.03	0.005987	0.003073
GO:0006720	isoprenoid metabolic process	261	0.04		0.009155	0.01	0.005774			0.009944
GO:0015977	carbon fixation	51			0.01	0.03		4.188e-07				0.0005287
GO:0046620	regulation of organ growth	30		0.02			3.376e-05
GO:0006325	chromatin organization	354	0.02					0.0004778
GO:0009853	photorespiration	40				0.02		0.0004846				0.006738
GO:0003002	regionalization	42	0.02						0.001017
GO:0009793	embryo development ending in seed dormancy	184	0.02						0.001829
GO:0009790	embryo development	187	0.02						0.001962
GO:0031667	response to nutrient levels	99		0.02			0.003325
GO:0048316	seed development	228	0.02						0.004575
GO:0010154	fruit development	237	0.02						0.005376
GO:0046655	folic acid metabolic process	16	0.02					0.009174
GO:0006722	triterpenoid metabolic process	36	0.02						0.01
GO:0016104	triterpenoid biosynthetic process	36	0.02						0.01
GO:0098869	cellular oxidant detoxification	147	0.02					0.01
GO:0009409	response to cold	161		0.02				0.02		0.000168	0.03
GO:0042435	indole-containing compound biosynthetic process	30		0.02				0.03
GO:0071704	organic substance metabolic process	22718	0.02	6.482e-07	0.04		0.02				0.00236
GO:1901605	alpha-amino acid metabolic process	575	1.802e-05	0.04			0.03	0.002773			0.0004836	0.002113
GO:0006629	lipid metabolic process	2008	0.05		0.01	0.0002186	0.02
GO:0050794	regulation of cellular process	6861		0.0009593	0.04					2.471e-05		0.006419
GO:0016054	organic acid catabolic process	217	0.001457	0.04			0.05				1.171e-07
GO:0051171	regulation of nitrogen compound metabolic process	4980		0.002217	0.04					0.0002522
GO:0060255	regulation of macromolecule metabolic process	5293		0.004323	0.04					7.223e-05
GO:0080090	regulation of primary metabolic process	5012		0.006412	0.04					0.0002741
GO:1901362	organic cyclic compound biosynthetic process	2877	0.04		0.008798					0.0003643
GO:0009611	response to wounding	244		0.02		0.03				0.008287
GO:0006082	organic acid metabolic process	1975	2.283e-05		0.05			0.005247			0.004577	0.04
GO:0007165	signal transduction	1278		0.009286	0.05		0.03		0.02
GO:0019438	aromatic compound biosynthetic process	2655	0.04		0.02					0.0001616
GO:0009266	response to temperature stimulus	312		0.03				0.002512		0.001986
GO:0009991	response to extracellular stimulus	112		0.03			0.005156
GO:0048366	leaf development	82		0.03					0.006838
GO:0019751	polyol metabolic process	83	0.03							0.008745
GO:0000162	tryptophan biosynthetic process	20	0.03					0.01
GO:0046219	indolalkylamine biosynthetic process	20	0.03					0.01
GO:0009658	chloroplast organization	142				0.03		0.01	0.03
GO:0048638	regulation of developmental growth	93	0.01	0.05			0.002654
GO:0016103	diterpenoid catabolic process	14			0.04					0.0002523
GO:0016115	terpenoid catabolic process	14			0.04					0.0002523
GO:0045487	gibberellin catabolic process	14			0.04					0.0002523
GO:0007389	pattern specification process	53	0.04						0.001998
GO:2000012	regulation of auxin polar transport	13			0.04		0.002801
GO:0010218	response to far red light	15		0.04				0.008075
GO:0010114	response to red light	16		0.04				0.009174
GO:0006591	ornithine metabolic process	14			0.04					0.02
GO:0010020	chloroplast fission	23	0.04							0.04
GO:0043572	plastid fission	23	0.04							0.04
GO:0034641	cellular nitrogen compound metabolic process	7697	0.05					3.189e-07
GO:0007167	enzyme linked receptor protein signaling pathway	39		0.05			0.02
GO:0007178	transmembrane receptor protein serine/threonine kinase signaling pathway	39		0.05			0.02
GO:0010496	intercellular transport	15			0.05					0.02
GO:0010497	plasmodesmata-mediated intercellular transport	15			0.05					0.02
GO:0044267	cellular protein metabolic process	9710		1.577e-29
GO:0019538	protein metabolic process	11500		4.048e-26
GO:1901564	organonitrogen compound metabolic process	14105		8.601e-26
GO:0031347	regulation of defense response	138		6.013e-23
GO:0002831	regulation of response to biotic stimulus	118		9.508e-23
GO:0032101	regulation of response to external stimulus	123		3.384e-22
GO:0080134	regulation of response to stress	215		8.063e-21
GO:0048583	regulation of response to stimulus	438		3.795e-18
GO:0044260	cellular macromolecule metabolic process	12995		9.35e-16
GO:0010112	regulation of systemic acquired resistance	24		1.535e-14
GO:0030244	cellulose biosynthetic process	108				3.449e-13					0.05
GO:0009751	response to salicylic acid	54		4.621e-12
GO:0043207	response to external biotic stimulus	348		5.006e-12							1.578e-05
GO:0051707	response to other organism	348		5.006e-12							1.578e-05
GO:0014070	response to organic cyclic compound	117		6.011e-12
GO:0009250	glucan biosynthetic process	217				6.772e-12
GO:0051274	beta-glucan biosynthetic process	147				1.394e-11
GO:1900424	regulation of defense response to bacterium	13		4.4e-11
GO:0030243	cellulose metabolic process	163				4.699e-11
GO:0009625	response to insect	9		6.222e-11
GO:2000068	regulation of defense response to insect	9		6.222e-11
GO:0033692	cellular polysaccharide biosynthetic process	272				1.367e-10
GO:0009617	response to bacterium	177		2.148e-10							0.01
GO:0006807	nitrogen compound metabolic process	18195		3.319e-10
GO:0010337	regulation of salicylic acid metabolic process	16		4.159e-10
GO:0051273	beta-glucan metabolic process	202				5.627e-10
GO:0000271	polysaccharide biosynthetic process	307				6.623e-10
GO:0002833	positive regulation of response to biotic stimulus	42		8.08e-10
GO:0009607	response to biotic stimulus	427		9.417e-10							6.191e-09	0.04
GO:0031349	positive regulation of defense response	43		1.065e-09
GO:0010200	response to chitin	12		1.295e-09
GO:0016051	carbohydrate biosynthetic process	458				1.891e-09
GO:0009862	systemic acquired resistance, salicylic acid mediated signaling pathway	13		2.755e-09
GO:0032103	positive regulation of response to external stimulus	47		2.986e-09
GO:0071407	cellular response to organic cyclic compound	59		3.224e-09
GO:0034637	cellular carbohydrate biosynthetic process	356				4.413e-09
GO:0009863	salicylic acid mediated signaling pathway	14		5.409e-09
GO:2000022	regulation of jasmonic acid mediated signaling pathway	21		5.988e-09
GO:0043170	macromolecule metabolic process	16199		6.034e-09
GO:2000031	regulation of salicylic acid mediated signaling pathway	15		9.956e-09
GO:0009605	response to external stimulus	580		1.301e-08							0.000524
GO:0080142	regulation of salicylic acid biosynthetic process	10		1.672e-08
GO:0044085	cellular component biogenesis	1818	1.778e-08
GO:0048584	positive regulation of response to stimulus	148		1.795e-08								0.01
GO:1900367	positive regulation of defense response to insect	6		2.408e-08
GO:0071446	cellular response to salicylic acid stimulus	17		2.9e-08
GO:1900426	positive regulation of defense response to bacterium	11		3.613e-08
GO:0042742	defense response to bacterium	158		4.769e-08							0.007022
GO:0098542	defense response to other organism	309		5.793e-08							4.806e-06
GO:0006564	L-serine biosynthetic process	16	6.754e-08
GO:0010410	hemicellulose metabolic process	210	1.044e-07
GO:0010383	cell wall polysaccharide metabolic process	218	1.743e-07
GO:1901698	response to nitrogen compound	86		2.614e-07								0.002402
GO:0006457	protein folding	361	5.203e-07
GO:0071840	cellular component organization or biogenesis	3537	6.149e-07
GO:0009832	plant-type cell wall biogenesis	102				8.703e-07					0.007457
GO:0007584	response to nutrient	5		9.573e-07
GO:0010565	regulation of cellular ketone metabolic process	40		1.587e-06
GO:1900150	regulation of defense response to fungus	40		1.587e-06
GO:0000025	maltose catabolic process	6				2.407e-06
GO:0044036	cell wall macromolecule metabolic process	301	2.806e-06								2.023e-10
GO:0009163	nucleoside biosynthetic process	17	3.516e-06
GO:0034404	nucleobase-containing small molecule biosynthetic process	17	3.516e-06
GO:0042451	purine nucleoside biosynthetic process	17	3.516e-06
GO:0042455	ribonucleoside biosynthetic process	17	3.516e-06
GO:0046129	purine ribonucleoside biosynthetic process	17	3.516e-06
GO:0009966	regulation of signal transduction	192		3.642e-06
GO:0023051	regulation of signaling	192		3.642e-06
GO:0016043	cellular component organization	3068	3.94e-06
GO:0022607	cellular component assembly	1198	4.27e-06
GO:0010243	response to organonitrogen compound	60		4.428e-06
GO:0010646	regulation of cell communication	197		5.068e-06
GO:0009411	response to UV	62		5.852e-06
GO:1901659	glycosyl compound biosynthetic process	19	6.449e-06
GO:0009856	pollination	516		6.755e-06
GO:0044706	multi-multicellular organism process	516		6.755e-06
GO:0010310	regulation of hydrogen peroxide metabolic process	14		6.98e-06
GO:0010262	somatic embryogenesis	3		9.279e-06
GO:0010618	aerenchyma formation	3		9.279e-06
GO:0045041	protein import into mitochondrial intermembrane space	3		9.279e-06
GO:0050829	defense response to Gram-negative bacterium	3		9.279e-06
GO:0052318	regulation of phytoalexin metabolic process	3		9.279e-06
GO:0052319	regulation of phytoalexin biosynthetic process	3		9.279e-06
GO:0052320	positive regulation of phytoalexin metabolic process	3		9.279e-06
GO:0052322	positive regulation of phytoalexin biosynthetic process	3		9.279e-06
GO:0060866	leaf abscission	3		9.279e-06
GO:0071327	cellular response to trehalose stimulus	3		9.279e-06
GO:0080151	positive regulation of salicylic acid mediated signaling pathway	3		9.279e-06
GO:1900378	positive regulation of secondary metabolite biosynthetic process	3		9.279e-06
GO:1901182	regulation of camalexin biosynthetic process	3		9.279e-06
GO:1901183	positive regulation of camalexin biosynthetic process	3		9.279e-06
GO:0015711	organic anion transport	97				9.758e-06
GO:0008037	cell recognition	441		9.861e-06
GO:0048544	recognition of pollen	441		9.861e-06
GO:0009069	serine family amino acid metabolic process	118	9.941e-06
GO:0000023	maltose metabolic process	9				9.996e-06
GO:0033108	mitochondrial respiratory chain complex assembly	36	1.28e-05
GO:0009875	pollen-pistil interaction	449		1.335e-05
GO:0009119	ribonucleoside metabolic process	37	1.509e-05
GO:0006820	anion transport	290				1.739e-05
GO:0009968	negative regulation of signal transduction	55		1.901e-05
GO:0010648	negative regulation of cell communication	55		1.901e-05
GO:0023057	negative regulation of signaling	55		1.901e-05
GO:0007005	mitochondrion organization	184	1.945e-05
GO:0009838	abscission	9		2.255e-05
GO:0009938	negative regulation of gibberellic acid mediated signaling pathway	9		2.255e-05
GO:1901264	carbohydrate derivative transport	69				2.552e-05
GO:0001192	maintenance of transcriptional fidelity during DNA-templated transcription elongation	5	3.037e-05
GO:0001193	maintenance of transcriptional fidelity during DNA-templated transcription elongation from RNA polymerase II promoter	5	3.037e-05
GO:0071669	plant-type cell wall organization or biogenesis	240				3.076e-05					0.009931
GO:0009627	systemic acquired resistance	59		3.215e-05
GO:0051176	positive regulation of sulfur metabolic process	4		3.653e-05
GO:0042546	cell wall biogenesis	327	3.189e-05			4.43e-05
GO:0015866	ADP transport	14				4.252e-05
GO:0140021	mitochondrial ADP transmembrane transport	14				4.252e-05
GO:1990544	mitochondrial ATP transmembrane transport	14				4.252e-05
GO:0044264	cellular polysaccharide metabolic process	512	8.516e-05			1.264e-09
GO:0071577	zinc ion transmembrane transport	46		4.687e-05
GO:0009313	oligosaccharide catabolic process	15				5.296e-05
GO:0046352	disaccharide catabolic process	15				5.296e-05
GO:0006829	zinc ion transport	47		5.407e-05
GO:0035999	tetrahydrofolate interconversion	15	5.426e-05
GO:0002237	response to molecule of bacterial origin	11		5.71e-05
GO:1901679	nucleotide transmembrane transport	16				6.494e-05
GO:0010411	xyloglucan metabolic process	148	7.021e-05
GO:0015790	UDP-xylose transmembrane transport	3				7.362e-05
GO:0015867	ATP transport	17				7.856e-05
GO:0009937	regulation of gibberellic acid mediated signaling pathway	22		7.981e-05
GO:0071216	cellular response to biotic stimulus	5		8.989e-05
GO:0071219	cellular response to molecule of bacterial origin	5		8.989e-05
GO:0015865	purine nucleotide transport	18				9.393e-05
GO:0015868	purine ribonucleotide transport	18				9.393e-05
GO:0051503	adenine nucleotide transport	18				9.393e-05
GO:0110102	ribulose bisphosphate carboxylase complex assembly	5			9.512e-05
GO:2000377	regulation of reactive oxygen species metabolic process	23		0.0001002
GO:0010224	response to UV-B	37		0.0001139
GO:0042278	purine nucleoside metabolic process	34	0.0001287
GO:0046128	purine ribonucleoside metabolic process	34	0.0001287
GO:0009688	abscisic acid biosynthetic process	6			0.0001424						0.04
GO:0043289	apocarotenoid biosynthetic process	6			0.0001424						0.04
GO:1902645	tertiary alcohol biosynthetic process	6			0.0001424						0.04
GO:0009439	cyanate metabolic process	6			0.0001424
GO:0048585	negative regulation of response to stimulus	114		0.0001547								0.005301
GO:0006283	transcription-coupled nucleotide-excision repair	8	0.0001646
GO:0006557	S-adenosylmethioninamine biosynthetic process	8	0.0001646
GO:0046499	S-adenosylmethioninamine metabolic process	8	0.0001646
GO:0043648	dicarboxylic acid metabolic process	134	0.0001675
GO:0072530	purine-containing compound transmembrane transport	22				0.0001747
GO:0009403	toxin biosynthetic process	6		0.000177
GO:0009404	toxin metabolic process	6		0.000177
GO:0009700	indole phytoalexin biosynthetic process	6		0.000177
GO:0010120	camalexin biosynthetic process	6		0.000177
GO:0010353	response to trehalose	6		0.000177
GO:0031099	regeneration	6		0.000177
GO:0034975	protein folding in endoplasmic reticulum	6		0.000177
GO:0046217	indole phytoalexin metabolic process	6		0.000177
GO:0052314	phytoalexin metabolic process	6		0.000177
GO:0052315	phytoalexin biosynthetic process	6		0.000177
GO:0052317	camalexin metabolic process	6		0.000177
GO:0070574	cadmium ion transmembrane transport	6		0.000177
GO:0080136	priming of cellular response to stress	6		0.000177
GO:1902065	response to L-glutamate	6		0.000177
GO:0098656	anion transmembrane transport	104				0.0001812
GO:0001666	response to hypoxia	15		0.0002208
GO:0010118	stomatal movement	15		0.0002208
GO:0002684	positive regulation of immune system process	27		0.0002242
GO:0031348	negative regulation of defense response	27		0.0002242
GO:0045089	positive regulation of innate immune response	27		0.0002242
GO:0050778	positive regulation of immune response	27		0.0002242
GO:0015914	phospholipid transport	42		0.000235
GO:0006597	spermine biosynthetic process	9	0.0002441
GO:0002682	regulation of immune system process	43		0.0002682
GO:0050776	regulation of immune response	43		0.0002682
GO:0072527	pyrimidine-containing compound metabolic process	144	0.0002869
GO:0015691	cadmium ion transport	7		0.0003048
GO:0043200	response to amino acid	7		0.0003048
GO:0050826	response to freezing	7		0.0003048
GO:0008215	spermine metabolic process	10	0.000345
GO:0008535	respiratory chain complex IV assembly	10	0.000345
GO:0033617	mitochondrial cytochrome c oxidase assembly	10	0.000345
GO:0033962	P-body assembly	10	0.000345
GO:0045491	xylan metabolic process	64	0.0003485
GO:0071310	cellular response to organic substance	459		0.0003579
GO:0009269	response to desiccation	24	0.0003804								0.01
GO:0006544	glycine metabolic process	24	0.0003804
GO:0006790	sulfur compound metabolic process	770	3.564e-05		0.0007443						0.0002905
GO:0006996	organelle organization	1745	0.0004131
GO:1900425	negative regulation of defense response to bacterium	2		0.0004418
GO:1990573	potassium ion import across plasma membrane	2		0.0004418
GO:0006379	mRNA cleavage	11	0.0004692
GO:0010225	response to UV-C	8		0.0004801
GO:0010942	positive regulation of cell death	8		0.0004801
GO:0051091	positive regulation of DNA-binding transcription factor activity	8		0.0004801
GO:0006862	nucleotide transport	31				0.0004932
GO:0071554	cell wall organization or biogenesis	931	0.0007219			0.0002821					3.944e-09
GO:0009687	abscisic acid metabolic process	9		0.0007088	0.0003396
GO:0043288	apocarotenoid metabolic process	9		0.0007088	0.0003396
GO:1902644	tertiary alcohol metabolic process	9		0.0007088	0.0003396
GO:0006221	pyrimidine nucleotide biosynthetic process	96	0.0005362
GO:0015931	nucleobase-containing compound transport	133				0.0005631
GO:0006220	pyrimidine nucleotide metabolic process	97	0.0005707
GO:0007568	aging	33		0.0005939
GO:0010150	leaf senescence	33		0.0005939
GO:0090693	plant organ senescence	33		0.0005939
GO:0062197	cellular response to chemical stress	47	0.0006068
GO:0006545	glycine biosynthetic process	12	0.0006188
GO:0019264	glycine biosynthetic process from serine	12	0.0006188
GO:0005976	polysaccharide metabolic process	680	0.001263			7.922e-08					0.00588
GO:0045492	xylan biosynthetic process	48	0.0006693
GO:0071324	cellular response to disaccharide stimulus	9		0.0007088
GO:0009800	cinnamic acid biosynthetic process	35		0.0007846							6.281e-06
GO:0009803	cinnamic acid metabolic process	35		0.0007846							6.281e-06
GO:0072528	pyrimidine-containing compound biosynthetic process	137	0.0009618
GO:0009695	jasmonic acid biosynthetic process	10		0.0009967
GO:0010105	negative regulation of ethylene-activated signaling pathway	10		0.0009967
GO:0070298	negative regulation of phosphorelay signal transduction system	10		0.0009967
GO:0044262	cellular carbohydrate metabolic process	711	0.002151			1.2e-10
GO:0006839	mitochondrial transport	108	0.001079
GO:0006559	L-phenylalanine catabolic process	56		0.001133							9.859e-09
GO:1902222	erythrose 4-phosphate/phosphoenolpyruvate family amino acid catabolic process	56		0.001133							9.859e-09
GO:0042558	pteridine-containing compound metabolic process	54	0.00115
GO:0006183	GTP biosynthetic process	15	0.001239
GO:0006228	UTP biosynthetic process	15	0.001239
GO:0046039	GTP metabolic process	15	0.001239
GO:0046051	UTP metabolic process	15	0.001239
GO:0009967	positive regulation of signal transduction	57		0.001244
GO:0023056	positive regulation of signaling	57		0.001244
GO:0036293	response to decreased oxygen levels	23		0.001253
GO:0010215	cellulose microfibril organization	43				0.001296
GO:0030198	extracellular matrix organization	43				0.001296
GO:0043062	extracellular structure organization	43				0.001296
GO:0070726	cell wall assembly	43				0.001296
GO:0071668	plant-type cell wall assembly	43				0.001296
GO:0009742	brassinosteroid mediated signaling pathway	39		0.001298
GO:0043401	steroid hormone mediated signaling pathway	39		0.001298
GO:0048545	response to steroid hormone	39		0.001298
GO:0071383	cellular response to steroid hormone stimulus	39		0.001298
GO:0002215	defense response to nematode	3		0.001307							0.02
GO:0010446	response to alkaline pH	3		0.001307							0.02
GO:0010728	regulation of hydrogen peroxide biosynthetic process	3		0.001307
GO:0015840	urea transport	3		0.001307
GO:0019755	one-carbon compound transport	3		0.001307
GO:0033273	response to vitamin	3		0.001307
GO:0033274	response to vitamin B2	3		0.001307
GO:0071918	urea transmembrane transport	3		0.001307
GO:0080027	response to herbivore	3		0.001307
GO:0080140	regulation of jasmonic acid metabolic process	3		0.001307
GO:0080141	regulation of jasmonic acid biosynthetic process	3		0.001307
GO:0090332	stomatal closure	3		0.001307
GO:1903426	regulation of reactive oxygen species biosynthetic process	3		0.001307
GO:0009833	plant-type primary cell wall biogenesis	11				0.001315					0.002952
GO:0051090	regulation of DNA-binding transcription factor activity	11		0.001349
GO:0045088	regulation of innate immune response	40		0.001458
GO:0070482	response to oxygen levels	24		0.001479
GO:0045944	positive regulation of transcription by RNA polymerase II	267			0.001548							0.05
GO:0000281	mitotic cytokinesis	12				0.001572					0.003525
GO:0016106	sesquiterpenoid biosynthetic process	19			0.001581
GO:0051234	establishment of localization	5635		2.499e-05		0.003515					7.98e-05
GO:0010104	regulation of ethylene-activated signaling pathway	12		0.001771
GO:0046622	positive regulation of organ growth	12		0.001771
GO:0070297	regulation of phosphorelay signal transduction system	12		0.001771
GO:0071322	cellular response to carbohydrate stimulus	12		0.001771
GO:0045927	positive regulation of growth	61		0.001774
GO:0009071	serine family amino acid catabolic process	17	0.001811
GO:0031204	posttranslational protein targeting to membrane, translocation	17	0.001811
GO:0071367	cellular response to brassinosteroid stimulus	42		0.001821
GO:0006354	DNA-templated transcription, elongation	36	0.001836
GO:0006368	transcription elongation from RNA polymerase II promoter	36	0.001836
GO:0010647	positive regulation of cell communication	62		0.001929
GO:0048518	positive regulation of biological process	870		0.001942
GO:0009147	pyrimidine nucleoside triphosphate metabolic process	61	0.00199
GO:0006357	regulation of transcription by RNA polymerase II	563			0.002019
GO:0006565	L-serine catabolic process	5	0.002068
GO:0010275	NAD(P)H dehydrogenase complex assembly	5	0.002068
GO:0042445	hormone metabolic process	107				0.002069
GO:0006620	posttranslational protein targeting to endoplasmic reticulum membrane	18	0.00215
GO:0097502	mannosylation	14				0.002154					0.004812
GO:0006241	CTP biosynthetic process	38	0.002248
GO:0006730	one-carbon metabolic process	38	0.002248
GO:0009148	pyrimidine nucleoside triphosphate biosynthetic process	38	0.002248
GO:0009208	pyrimidine ribonucleoside triphosphate metabolic process	38	0.002248
GO:0009209	pyrimidine ribonucleoside triphosphate biosynthetic process	38	0.002248
GO:0046036	CTP metabolic process	38	0.002248
GO:1902532	negative regulation of intracellular signal transduction	13		0.002266
GO:0008610	lipid biosynthetic process	1018	0.00255			0.001995
GO:0070592	cell wall polysaccharide biosynthetic process	63	0.002296
GO:0032981	mitochondrial respiratory chain complex I assembly	19	0.002526
GO:0080113	regulation of seed growth	19	0.002526
GO:0018871	1-aminocyclopropane-1-carboxylate metabolic process	4		0.002577
GO:0035627	ceramide transport	4		0.002577
GO:0042218	1-aminocyclopropane-1-carboxylate biosynthetic process	4		0.002577
GO:0045815	epigenetic maintenance of chromatin in transcription-competent conformation	4		0.002577
GO:1902389	ceramide 1-phosphate transport	4		0.002577
GO:0044038	cell wall macromolecule biosynthetic process	65	0.002635
GO:0070589	cellular component macromolecule biosynthetic process	65	0.002635
GO:0006810	transport	5601		1.825e-05		0.005277					6.672e-05
GO:0042446	hormone biosynthetic process	56				0.002775
GO:0010229	inflorescence development	14		0.002839
GO:0008216	spermidine metabolic process	20	0.002939
GO:0008295	spermidine biosynthetic process	20	0.002939
GO:0000041	transition metal ion transport	140		0.002955
GO:0015942	formate metabolic process	6	0.003073
GO:0042183	formate catabolic process	6	0.003073
GO:0070973	protein localization to endoplasmic reticulum exit site	6	0.003073
GO:0006073	cellular glucan metabolic process	443	0.006254			1.409e-10
GO:0044042	glucan metabolic process	445	0.006495			1.51e-10
GO:0010257	NADH dehydrogenase complex assembly	21	0.003392
GO:0009867	jasmonic acid mediated signaling pathway	30		0.003451
GO:0006935	chemotaxis	15		0.003494								0.0009539
GO:0010183	pollen tube guidance	15		0.003494								0.0009539
GO:0042330	taxis	15		0.003494								0.0009539
GO:0050918	positive chemotaxis	15		0.003494								0.0009539
GO:0048639	positive regulation of developmental growth	15		0.003494
GO:0003333	amino acid transmembrane transport	18				0.003574
GO:0006869	lipid transport	291		0.003796							0.006794
GO:0006760	folic acid-containing compound metabolic process	44	0.003859
GO:0055086	nucleobase-containing small molecule metabolic process	857	0.004424
GO:0009309	amine biosynthetic process	105	0.004526
GO:0042401	cellular biogenic amine biosynthetic process	105	0.004526
GO:0120254	olefinic compound metabolic process	46		4.816e-06	0.009055						1.258e-06
GO:0071395	cellular response to jasmonic acid stimulus	33		0.004903
GO:0010876	lipid localization	300		0.004947							0.007963
GO:0120255	olefinic compound biosynthetic process	43		0.002026	0.007949						8.343e-07
GO:0007205	protein kinase C-activating G protein-coupled receptor signaling pathway	24	0.004997
GO:0015936	coenzyme A metabolic process	24	0.004997
GO:0015748	organophosphate ester transport	73		0.004399		0.005852
GO:0009218	pyrimidine ribonucleotide metabolic process	48	0.005284
GO:0009220	pyrimidine ribonucleotide biosynthetic process	48	0.005284
GO:0016567	protein ubiquitination	676		0.005305
GO:0019253	reductive pentose-phosphate cycle	22				0.005325
GO:0019685	photosynthesis, dark reaction	22				0.005325
GO:0009690	cytokinin metabolic process	71				0.005417
GO:0016114	terpenoid biosynthetic process	147			0.01	0.0008843
GO:0071398	cellular response to fatty acid	34		0.005465
GO:1901002	positive regulation of response to salt stress	34		0.005465
GO:0009908	flower development	154		0.005518
GO:0006123	mitochondrial electron transport, cytochrome c to oxygen	8	0.005625
GO:0006616	SRP-dependent cotranslational protein targeting to membrane, translocation	8	0.005625
GO:0009063	cellular amino acid catabolic process	150	0.001716	0.01							2.379e-07
GO:0006714	sesquiterpenoid metabolic process	22		0.01	0.002122
GO:0061077	chaperone-mediated protein folding	38			0.006251
GO:0009268	response to pH	6		0.006265							0.04
GO:0048439	flower morphogenesis	6		0.006265
GO:0098659	inorganic cation import across plasma membrane	6		0.006265
GO:0099587	inorganic ion import across plasma membrane	6		0.006265
GO:0034754	cellular hormone metabolic process	75				0.006307
GO:0044255	cellular lipid metabolic process	1282			0.007166	0.005454
GO:0016129	phytosteroid biosynthetic process	24				0.006321
GO:0017004	cytochrome complex assembly	81	0.006758
GO:0090567	reproductive shoot system development	159		0.006763
GO:1990542	mitochondrial transmembrane transport	77				0.006783
GO:0019346	transsulfuration	25				0.006848
GO:0050667	homocysteine metabolic process	25				0.006848
GO:0009074	aromatic amino acid family catabolic process	80		0.006866							1.719e-07
GO:0009788	negative regulation of abscisic acid-activated signaling pathway	19		0.00699
GO:0120009	intermembrane lipid transfer	19		0.00699
GO:1901420	negative regulation of response to alcohol	19		0.00699
GO:1905958	negative regulation of cellular response to alcohol	19		0.00699
GO:0070887	cellular response to chemical stimulus	656		0.007043
GO:0006166	purine ribonucleoside salvage	9	0.007163
GO:0043174	nucleoside salvage	9	0.007163
GO:0009092	homoserine metabolic process	26				0.007395
GO:0016128	phytosteroid metabolic process	26				0.007395
GO:0090481	pyrimidine nucleotide-sugar transmembrane transport	26				0.007395
GO:0051259	protein complex oligomerization	53	0.00751
GO:0009311	oligosaccharide metabolic process	154				0.007536
GO:0006558	L-phenylalanine metabolic process	82		0.007725							2.085e-07
GO:1902221	erythrose 4-phosphate/phosphoenolpyruvate family amino acid metabolic process	82		0.007725							2.085e-07
GO:1901606	alpha-amino acid catabolic process	147	0.006068	0.01							1.938e-06
GO:0046940	nucleoside monophosphate phosphorylation	7		0.008649
GO:0000302	response to reactive oxygen species	86	0.008658
GO:0009741	response to brassinosteroid	58		0.007451	0.01
GO:0006312	mitotic recombination	10	0.008867
GO:0009787	regulation of abscisic acid-activated signaling pathway	39		0.008924
GO:1901419	regulation of response to alcohol	39		0.008924
GO:1905957	regulation of cellular response to alcohol	39		0.008924
GO:0006593	ornithine catabolic process	3			0.009272
GO:0009413	response to flooding	3			0.009272
GO:0019544	arginine catabolic process to glutamate	3			0.009272
GO:0009739	response to gibberellin	40		0.009754							0.003372
GO:0008643	carbohydrate transport	95				0.01					0.005819	0.03
GO:0000910	cytokinesis	34				0.01					0.03
GO:0009448	gamma-aminobutyric acid metabolic process	4			0.01						0.03
GO:0006285	base-excision repair, AP site formation	4			0.01
GO:0006694	steroid biosynthetic process	90				0.01
GO:0009664	plant-type cell wall organization	177				0.01
GO:0009691	cytokinin biosynthetic process	34				0.01
GO:0009834	plant-type secondary cell wall biogenesis	34				0.01
GO:0010569	regulation of double-strand break repair via homologous recombination	1	0.01
GO:0010731	protein glutathionylation	1	0.01
GO:0019217	regulation of fatty acid metabolic process	8		0.01
GO:0022414	reproductive process	1180		0.01
GO:0032446	protein modification by small protein conjugation	723		0.01
GO:0042304	regulation of fatty acid biosynthetic process	8		0.01
GO:0045738	negative regulation of DNA repair	1	0.01
GO:0045893	positive regulation of transcription, DNA-templated	432			0.01
GO:0046916	cellular transition metal ion homeostasis	64	0.01
GO:0047484	regulation of response to osmotic stress	44		0.01
GO:0090610	bundle sheath cell fate specification	1	0.01
GO:0098657	import into cell	9		0.01
GO:0098739	import across plasma membrane	8		0.01
GO:1901000	regulation of response to salt stress	43		0.01
GO:1902680	positive regulation of RNA biosynthetic process	432			0.01
GO:1903508	positive regulation of nucleic acid-templated transcription	432			0.01
GO:2000042	negative regulation of double-strand break repair via homologous recombination	1	0.01
GO:2000779	regulation of double-strand break repair	1	0.01
GO:2000780	negative regulation of double-strand break repair	1	0.01
GO:2001021	negative regulation of response to DNA damage stimulus	1	0.01
GO:0071555	cell wall organization	676	0.02			9.522e-06
GO:0045229	external encapsulating structure organization	708	0.02			1.588e-05
GO:0002213	defense response to insect	8		0.0004801	0.02
GO:0009699	phenylpropanoid biosynthetic process	66	0.02	0.01							1.075e-05
GO:0006817	phosphate ion transport	48				0.02					0.005648
GO:0005977	glycogen metabolic process	38				0.02
GO:0005980	glycogen catabolic process	4				0.02
GO:0006112	energy reserve metabolic process	38				0.02
GO:0006122	mitochondrial electron transport, ubiquinol to cytochrome c	16	0.02
GO:0006207	'de novo' pyrimidine nucleobase biosynthetic process	28		0.02
GO:0006768	biotin metabolic process	8			0.02
GO:0006848	pyruvate transport	16	0.02
GO:0006850	mitochondrial pyruvate transmembrane transport	16	0.02
GO:0006865	amino acid transport	42				0.02
GO:0007006	mitochondrial membrane organization	41	0.02
GO:0007007	inner mitochondrial membrane organization	37	0.02
GO:0009102	biotin biosynthetic process	8			0.02
GO:0009608	response to symbiont	1		0.02
GO:0009610	response to symbiotic fungus	1		0.02
GO:0009624	response to nematode	11		0.02
GO:0009694	jasmonic acid metabolic process	26		0.02
GO:0009825	multidimensional cell growth	10		0.02
GO:0010364	regulation of ethylene biosynthetic process	11		0.02
GO:0014066	regulation of phosphatidylinositol 3-kinase signaling	1		0.02
GO:0014068	positive regulation of phosphatidylinositol 3-kinase signaling	1		0.02
GO:0016126	sterol biosynthetic process	43				0.02
GO:0030026	cellular manganese ion homeostasis	43	0.02
GO:0031335	regulation of sulfur amino acid metabolic process	11		0.02
GO:0042775	mitochondrial ATP synthesis coupled electron transport	40	0.02
GO:0043090	amino acid import	1		0.02
GO:0045039	protein insertion into mitochondrial inner membrane	36	0.02
GO:0051014	actin filament severing	7			0.02
GO:0051204	protein insertion into mitochondrial membrane	40	0.02
GO:0051646	mitochondrion localization	6			0.02
GO:0051938	L-glutamate import	1		0.02
GO:0052863	1-deoxy-D-xylulose 5-phosphate metabolic process	1		0.02
GO:0052865	1-deoxy-D-xylulose 5-phosphate biosynthetic process	1		0.02
GO:0055071	manganese ion homeostasis	43	0.02
GO:0060964	regulation of gene silencing by miRNA	1		0.02
GO:0080186	developmental vegetative growth	10		0.02
GO:0090151	establishment of protein localization to mitochondrial membrane	40	0.02
GO:1900908	regulation of olefin metabolic process	11		0.02
GO:1900911	regulation of olefin biosynthetic process	11		0.02
GO:1901475	pyruvate transmembrane transport	16	0.02
GO:1903705	positive regulation of production of siRNA involved in RNA interference	1		0.02
GO:1903825	organic acid transmembrane transport	38				0.02
GO:1905039	carboxylic acid transmembrane transport	38				0.02
GO:0006952	defense response	729	0.04	0.0009789							9.616e-07
GO:0016042	lipid catabolic process	239		0.001819	0.04
GO:0006658	phosphatidylserine metabolic process	6			0.02	0.03					0.04
GO:0006659	phosphatidylserine biosynthetic process	6			0.02	0.03					0.04
GO:0044550	secondary metabolite biosynthetic process	94	0.05	0.0001685							8.069e-05
GO:0055129	L-proline biosynthetic process	11			0.03						0.002952
GO:0052575	carbohydrate localization	2	0.03								0.01
GO:0052576	carbohydrate storage	2	0.03								0.01
GO:0000038	very long-chain fatty acid metabolic process	10			0.03
GO:0006265	DNA topological change	45	0.03
GO:0006625	protein targeting to peroxisome	34		0.03
GO:0009229	thiamine diphosphate biosynthetic process	10			0.03
GO:0009809	lignin biosynthetic process	18	0.03
GO:0009864	induced systemic resistance, jasmonic acid mediated signaling pathway	12		0.03
GO:0009866	induced systemic resistance, ethylene mediated signaling pathway	2	0.03
GO:0010024	phytochromobilin biosynthetic process	7				0.03
GO:0018063	cytochrome c-heme linkage	2	0.03
GO:0019646	aerobic electron transport chain	45	0.03
GO:0019856	pyrimidine nucleobase biosynthetic process	33		0.03
GO:0031110	regulation of microtubule polymerization or depolymerization	2	0.03
GO:0031112	positive regulation of microtubule polymerization or depolymerization	2	0.03
GO:0031113	regulation of microtubule polymerization	2	0.03
GO:0031116	positive regulation of microtubule polymerization	2	0.03
GO:0032273	positive regulation of protein polymerization	2	0.03
GO:0032468	Golgi calcium ion homeostasis	2	0.03
GO:0032472	Golgi calcium ion transport	2	0.03
GO:0032957	inositol trisphosphate metabolic process	18	0.03
GO:0033389	putrescine biosynthetic process from arginine, using agmatinase	2	0.03
GO:0035434	copper ion transmembrane transport	13		0.03
GO:0035670	plant-type ovary development	31		0.03
GO:0042357	thiamine diphosphate metabolic process	10			0.03
GO:0042543	protein N-linked glycosylation via arginine	2	0.03
GO:0043007	maintenance of rDNA	2	0.03
GO:0043647	inositol phosphate metabolic process	47	0.03
GO:0048441	petal development	6				0.03
GO:0048465	corolla development	6				0.03
GO:0048481	plant ovule development	31		0.03
GO:0051202	phytochromobilin metabolic process	7				0.03
GO:0051205	protein insertion into membrane	49	0.03
GO:0072662	protein localization to peroxisome	34		0.03
GO:0072663	establishment of protein localization to peroxisome	34		0.03
GO:0097428	protein maturation by iron-sulfur cluster transfer	19	0.03
GO:1902903	regulation of supramolecular fiber organization	46	0.03
GO:0015780	nucleotide-sugar transmembrane transport	38		0.05		0.02
GO:0009450	gamma-aminobutyric acid catabolic process	3	0.04								0.02
GO:0000024	maltose biosynthetic process	3	0.04
GO:0002832	negative regulation of response to biotic stimulus	15		0.04
GO:0006206	pyrimidine nucleobase metabolic process	36		0.04
GO:0006213	pyrimidine nucleoside metabolic process	3	0.04
GO:0006216	cytidine catabolic process	3	0.04
GO:0006225	UDP biosynthetic process	2		0.04
GO:0006233	dTDP biosynthetic process	3	0.04
GO:0006458	'de novo' protein folding	22	0.04
GO:0006680	glucosylceramide catabolic process	16		0.04
GO:0007129	homologous chromosome pairing at meiosis	23	0.04
GO:0009186	deoxyribonucleoside diphosphate metabolic process	3	0.04
GO:0009188	ribonucleoside diphosphate biosynthetic process	2		0.04
GO:0009189	deoxyribonucleoside diphosphate biosynthetic process	3	0.04
GO:0009193	pyrimidine ribonucleoside diphosphate metabolic process	2		0.04
GO:0009194	pyrimidine ribonucleoside diphosphate biosynthetic process	2		0.04
GO:0009196	pyrimidine deoxyribonucleoside diphosphate metabolic process	3	0.04
GO:0009197	pyrimidine deoxyribonucleoside diphosphate biosynthetic process	3	0.04
GO:0009682	induced systemic resistance	16		0.04
GO:0009972	cytidine deamination	3	0.04
GO:0010023	proanthocyanidin biosynthetic process	3	0.04
GO:0010133	proline catabolic process to glutamate	3	0.04
GO:0010193	response to ozone	13			0.04
GO:0015706	nitrate transport	13			0.04
GO:0015786	UDP-glucose transmembrane transport	2		0.04
GO:0017003	protein-heme linkage	3	0.04
GO:0019377	glycolipid catabolic process	16		0.04
GO:0019628	urate catabolic process	3	0.04
GO:0032102	negative regulation of response to external stimulus	15		0.04
GO:0033388	putrescine biosynthetic process from arginine	3	0.04
GO:0043101	purine-containing compound salvage	22	0.04
GO:0043570	maintenance of DNA repeat elements	3	0.04
GO:0043574	peroxisomal transport	37		0.04
GO:0044788	modulation by host of viral process	2		0.04
GO:0044794	positive regulation by host of viral process	2		0.04
GO:0046048	UDP metabolic process	2		0.04
GO:0046072	dTDP metabolic process	3	0.04
GO:0046087	cytidine metabolic process	3	0.04
GO:0046131	pyrimidine ribonucleoside metabolic process	3	0.04
GO:0046133	pyrimidine ribonucleoside catabolic process	3	0.04
GO:0046135	pyrimidine nucleoside catabolic process	3	0.04
GO:0046415	urate metabolic process	3	0.04
GO:0046477	glycosylceramide catabolic process	16		0.04
GO:0046479	glycosphingolipid catabolic process	16		0.04
GO:0046685	response to arsenic-containing substance	3	0.04
GO:0046704	CDP metabolic process	2		0.04
GO:0046705	CDP biosynthetic process	2		0.04
GO:0048870	cell motility	3	0.04
GO:0051084	'de novo' posttranslational protein folding	21	0.04
GO:0051085	chaperone cofactor-dependent protein refolding	21	0.04
GO:0051495	positive regulation of cytoskeleton organization	3	0.04
GO:0051674	localization of cell	3	0.04
GO:0051693	actin filament capping	12			0.04
GO:0051851	modulation by host of symbiont process	2		0.04
GO:0070919	production of siRNA involved in gene silencing by small RNA	3	0.04
GO:1902905	positive regulation of supramolecular fiber organization	3	0.04
GO:1990641	response to iron ion starvation	3	0.04
GO:0006561	proline biosynthetic process	15			0.05						0.005525
GO:0010167	response to nitrate	16			0.05							0.001088
GO:0002252	immune effector process	17		0.05
GO:0006074	(1->3)-beta-D-glucan metabolic process	39		0.05
GO:0006075	(1->3)-beta-D-glucan biosynthetic process	39		0.05
GO:0006527	arginine catabolic process	16			0.05
GO:0009740	gibberellic acid mediated signaling pathway	15			0.05
GO:0010476	gibberellin mediated signaling pathway	16			0.05
GO:0030834	regulation of actin filament depolymerization	16			0.05
GO:0030835	negative regulation of actin filament depolymerization	15			0.05
GO:0030837	negative regulation of actin filament polymerization	15			0.05
GO:0031333	negative regulation of protein-containing complex assembly	15			0.05
GO:0032272	negative regulation of protein polymerization	15			0.05
GO:0042538	hyperosmotic salinity response	15			0.05
GO:0071370	cellular response to gibberellin stimulus	16			0.05
GO:1901879	regulation of protein depolymerization	16			0.05
GO:1901880	negative regulation of protein depolymerization	15			0.05
GO:0015979	photosynthesis	700						8.648e-31
GO:0043604	amide biosynthetic process	1825						2.768e-17
GO:0006412	translation	1733						1.764e-16
GO:0043043	peptide biosynthetic process	1754						2.97e-16
GO:0019684	photosynthesis, light reaction	308						1.381e-11
GO:0060567	negative regulation of DNA-templated transcription, termination	3								4.652e-09
GO:0006091	generation of precursor metabolites and energy	1002						6.354e-09
GO:0032544	plastid translation	12						4.693e-08
GO:0031554	regulation of DNA-templated transcription, termination	6								9.27e-08
GO:0010588	cotyledon vascular tissue pattern formation	4							4.043e-07
GO:0048598	embryonic morphogenesis	4							4.043e-07
GO:0048826	cotyledon morphogenesis	4							4.043e-07
GO:0090351	seedling development	47								1.289e-06
GO:0046621	negative regulation of organ growth	17					3.123e-06
GO:0048640	negative regulation of developmental growth	17					3.123e-06
GO:0043242	negative regulation of protein-containing complex disassembly	18								3.727e-06
GO:0010016	shoot system morphogenesis	50							3.877e-06
GO:0010467	gene expression	4862						7.481e-06
GO:0010305	leaf vascular tissue pattern formation	9							8.345e-06
GO:0045926	negative regulation of growth	22					9.367e-06
GO:0010087	phloem or xylem histogenesis	31							1.339e-05
GO:1900865	chloroplast RNA modification	11							1.628e-05
GO:0009631	cold acclimation	29								1.646e-05	0.001326
GO:0006751	glutathione catabolic process	18						1.903e-05
GO:0018298	protein-chromophore linkage	90						1.988e-05
GO:0048825	cotyledon development	12							2.163e-05
GO:0043244	regulation of protein-containing complex disassembly	33								2.446e-05
GO:0009965	leaf morphogenesis	13							2.802e-05
GO:0043171	peptide catabolic process	20						2.969e-05
GO:0000413	protein peptidyl-prolyl isomerization	96						3.025e-05
GO:0009767	photosynthetic electron transport chain	137						4.122e-05
GO:0010051	xylem and phloem pattern formation	15							4.427e-05
GO:0018208	peptidyl-proline modification	103						4.76e-05
GO:0043953	protein transport by the Tat complex	9						6.107e-05
GO:0044273	sulfur compound catabolic process	24						6.326e-05
GO:0000165	MAPK cascade	18							7.856e-05
GO:0022900	electron transport chain	453						9.077e-05
GO:0051129	negative regulation of cellular component organization	52								9.68e-05
GO:0042219	cellular modified amino acid catabolic process	27						0.0001022
GO:0010438	cellular response to sulfur starvation	3					0.0001122
GO:0010439	regulation of glucosinolate biosynthetic process	3					0.0001122
GO:0006438	valyl-tRNA aminoacylation	11						0.0001183
GO:0010187	negative regulation of seed germination	4							0.0001301
GO:0009773	photosynthetic electron transport in photosystem I	31						0.0001781
GO:0006552	leucine catabolic process	4					0.0002235
GO:0006437	tyrosyl-tRNA aminoacylation	3						0.0002481
GO:0043686	co-translational protein modification	3						0.0002481
GO:0005983	starch catabolic process	14						0.0002558
GO:0042371	vitamin K biosynthetic process	14						0.0002558
GO:0042372	phylloquinone biosynthetic process	14						0.0002558
GO:0042373	vitamin K metabolic process	14						0.0002558
GO:0042374	phylloquinone metabolic process	14						0.0002558
GO:0006979	response to oxidative stress	892						0.0002643
GO:0010675	regulation of cellular carbohydrate metabolic process	22					0.0003238
GO:0009657	plastid organization	188						0.0003663
GO:0000272	polysaccharide catabolic process	219					0.000446				0.0002762
GO:0042335	cuticle development	7							0.000451
GO:0043038	amino acid activation	244						0.0004568
GO:0043039	tRNA aminoacylation	244						0.0004568
GO:0006109	regulation of carbohydrate metabolic process	25					0.0004771
GO:0015994	chlorophyll metabolic process	72						0.000528
GO:0006537	glutamate biosynthetic process	6					0.0005541
GO:0006851	mitochondrial calcium ion transmembrane transport	6					0.0005541
GO:0006568	tryptophan metabolic process	73						0.0005626
GO:0006586	indolalkylamine metabolic process	73						0.0005626
GO:0008300	isoprenoid catabolic process	22								0.0006347
GO:0015995	chlorophyll biosynthetic process	45						0.0007622
GO:0006775	fat-soluble vitamin metabolic process	20						0.000769
GO:0009306	protein secretion	20						0.000769
GO:0035592	establishment of protein localization to extracellular region	20						0.000769
GO:0042362	fat-soluble vitamin biosynthetic process	20						0.000769
GO:0071692	protein localization to extracellular region	20						0.000769
GO:0006863	purine nucleobase transport	7					0.0007726
GO:0015851	nucleobase transport	7					0.0007726
GO:0009934	regulation of meristem structural organization	10							0.0009575
GO:0048581	negative regulation of post-embryonic development	42							0.001017			0.0002974
GO:0008272	sulfate transport	35					0.001297
GO:0009083	branched-chain amino acid catabolic process	9					0.001314
GO:0009637	response to blue light	52						0.001317
GO:0009685	gibberellin metabolic process	32								0.001348
GO:0044271	cellular nitrogen compound biosynthetic process	4399						6e-12		0.002995
GO:0072348	sulfur compound transport	37					0.001526
GO:0048580	regulation of post-embryonic development	177							0.001543			0.02
GO:2000026	regulation of multicellular organismal development	177							0.001543			0.02
GO:0042793	plastid transcription	18						4.852e-07	0.003176
GO:0051241	negative regulation of multicellular organismal process	59					0.0004872		0.002716			0.0008106
GO:0009267	cellular response to starvation	82					0.001676
GO:0009768	photosynthesis, light harvesting in photosystem I	26						0.001684
GO:0010206	photosystem II repair	7						0.001695
GO:0006399	tRNA metabolic process	487						0.001986
GO:0051093	negative regulation of developmental process	64					0.000664		0.003422			0.001027
GO:0031669	cellular response to nutrient levels	87					0.002083
GO:0006778	porphyrin-containing compound metabolic process	143						0.002106				0.009861
GO:0009926	auxin polar transport	15							0.0022
GO:0042594	response to starvation	89					0.002263
GO:0007275	multicellular organism development	1090								0.00257
GO:0006779	porphyrin-containing compound biosynthetic process	103						0.002623				0.003995
GO:0045892	negative regulation of transcription, DNA-templated	166								0.002852		0.01
GO:1902679	negative regulation of RNA biosynthetic process	169								0.003		0.02
GO:1903507	negative regulation of nucleic acid-templated transcription	169								0.003		0.02
GO:0032890	regulation of organic acid transport	32						0.003085
GO:0051952	regulation of amine transport	32						0.003085
GO:0051955	regulation of amino acid transport	32						0.003085
GO:0080143	regulation of amino acid export	32						0.003085
GO:1903789	regulation of amino acid transmembrane transport	32						0.003085
GO:0031668	cellular response to extracellular stimulus	97					0.00309
GO:0071496	cellular response to external stimulus	97					0.00309
GO:0019566	arabinose metabolic process	18							0.003176
GO:0046373	L-arabinose metabolic process	18							0.003176
GO:0043094	cellular metabolic compound salvage	108						0.003218				0.004561
GO:0006423	cysteinyl-tRNA aminoacylation	10						0.003567
GO:0070681	glutaminyl-tRNAGln biosynthesis via transamidation	10						0.003567
GO:0033013	tetrapyrrole metabolic process	160						0.003673				0.01
GO:0006551	leucine metabolic process	15					0.00374
GO:0043255	regulation of carbohydrate biosynthetic process	15					0.00374
GO:0051253	negative regulation of RNA metabolic process	184								0.003807		0.02
GO:0000278	mitotic cell cycle	185								0.003865
GO:0046656	folic acid biosynthetic process	11						0.004333
GO:0048856	anatomical structure development	1205								0.004438
GO:0005992	trehalose biosynthetic process	56					0.004996					0.01
GO:0019310	inositol catabolic process	3								0.005039
GO:0045934	negative regulation of nucleobase-containing compound metabolic process	204								0.005072		0.03
GO:0048285	organelle fission	208								0.005351
GO:0009646	response to absence of light	18					0.005383
GO:0051128	regulation of cellular component organization	209								0.005423
GO:0007049	cell cycle	415								0.005474
GO:0033014	tetrapyrrole biosynthetic process	123						0.005583				0.006538
GO:0009914	hormone transport	24							0.005624
GO:0060918	auxin transport	24							0.005624
GO:0009733	response to auxin	526					0.005661
GO:0005991	trehalose metabolic process	59					0.005781					0.01
GO:0006418	tRNA aminoacylation for protein translation	233						0.005908
GO:0006677	glycosylceramide metabolic process	19					0.005992
GO:0006678	glucosylceramide metabolic process	19					0.005992
GO:0006687	glycosphingolipid metabolic process	19					0.005992
GO:0009735	response to cytokinin	79						0.006026
GO:0098755	maintenance of seed dormancy by absisic acid	2							0.009332	0.003362
GO:0010038	response to metal ion	128						0.006589			0.0004339
GO:0007349	cellularization	4								0.006714
GO:0009558	embryo sac cellularization	4								0.006714
GO:0032879	regulation of localization	103					0.003832	0.01
GO:0046654	tetrahydrofolate biosynthetic process	14						0.007041
GO:0051239	regulation of multicellular organismal process	226					0.01		0.004409			0.03
GO:0048523	negative regulation of cellular process	711								0.007253
GO:0006535	cysteine biosynthetic process from serine	44						0.007598
GO:0050793	regulation of developmental process	363							0.007617
GO:0030091	protein repair	15						0.008075
GO:0007080	mitotic metaphase plate congression	5								0.008385
GO:0042450	arginine biosynthetic process via ornithine	5								0.008385
GO:0050000	chromosome localization	5								0.008385
GO:0051303	establishment of chromosome localization	5								0.008385
GO:0051310	metaphase plate congression	5								0.008385
GO:0051315	attachment of mitotic spindle microtubules to kinetochore	5								0.008385
GO:0046686	response to cadmium ion	87						0.008433			5.23e-05
GO:0007623	circadian rhythm	46						0.008592
GO:0042407	cristae formation	1						0.009129
GO:0009964	negative regulation of flavonoid biosynthetic process	2							0.009332
GO:0034765	regulation of ion transmembrane transport	24					0.009478
GO:0019344	cysteine biosynthetic process	48						0.009659
GO:0048609	multicellular organismal reproductive process	88								0.009783
GO:0015939	pantothenate metabolic process	6								0.01	0.04
GO:0015940	pantothenate biosynthetic process	6								0.01	0.04
GO:0046351	disaccharide biosynthetic process	79					0.01					0.02
GO:0005996	monosaccharide metabolic process	292							0.01
GO:0005997	xylulose metabolic process	2					0.01
GO:0006099	tricarboxylic acid cycle	101						0.01
GO:0006144	purine nucleobase metabolic process	29					0.01
GO:0006260	DNA replication	281							0.01
GO:0006821	chloride transport	34							0.01
GO:0007112	male meiosis cytokinesis	6								0.01
GO:0008608	attachment of spindle microtubules to kinetochore	8								0.01
GO:0009638	phototropism	18						0.01
GO:0009738	abscisic acid-activated signaling pathway	97							0.01	0.01
GO:0009791	post-embryonic development	532								0.01
GO:0010966	regulation of phosphate transport	2					0.01
GO:0016070	RNA metabolic process	3477								0.01
GO:0019321	pentose metabolic process	34							0.01
GO:0031324	negative regulation of cellular metabolic process	546								0.01
GO:0032504	multicellular organism reproduction	91								0.01
GO:0033206	meiotic cytokinesis	6								0.01
GO:0034660	ncRNA metabolic process	775						0.01
GO:0051172	negative regulation of nitrogen compound metabolic process	524								0.01
GO:0052746	inositol phosphorylation	2					0.01
GO:0071215	cellular response to abscisic acid stimulus	105							0.01	0.01
GO:0080022	primary root development	6								0.01
GO:0080163	regulation of protein serine/threonine phosphatase activity	7								0.01
GO:0097306	cellular response to alcohol	105							0.01	0.01
GO:1902395	regulation of 1-deoxy-D-xylulose-5-phosphate synthase activity	2					0.01
GO:1903795	regulation of inorganic anion transmembrane transport	2					0.01
GO:1903959	regulation of anion transmembrane transport	2					0.01
GO:2000185	regulation of phosphate transmembrane transport	2					0.01
GO:0009416	response to light stimulus	364						0.0001568		0.02
GO:0009651	response to salt stress	217						0.02		0.0005209	0.006213
GO:0042181	ketone biosynthetic process	46						0.0008288	0.02
GO:1901661	quinone metabolic process	46						0.0008288	0.02
GO:1901663	quinone biosynthetic process	46						0.0008288	0.02
GO:0010431	seed maturation	13						0.006072		0.02
GO:0010231	maintenance of seed dormancy	5							0.02	0.008385
GO:0097437	maintenance of dormancy	5							0.02	0.008385
GO:0044242	cellular lipid catabolic process	90					0.02			0.01
GO:0009314	response to radiation	379						0.0002269		0.03
GO:1902584	positive regulation of response to water deprivation	21							0.004319	0.03
GO:0006012	galactose metabolic process	43							0.02		0.04
GO:2000242	negative regulation of reproductive process	40							0.02			0.0002571
GO:0000256	allantoin catabolic process	3					0.02
GO:0000372	Group I intron splicing	2						0.02
GO:0000373	Group II intron splicing	26						0.02
GO:0000376	RNA splicing, via transesterification reactions with guanosine as nucleophile	2						0.02
GO:0006020	inositol metabolic process	12								0.02
GO:0006145	purine nucleobase catabolic process	4					0.02
GO:0006177	GMP biosynthetic process	9								0.02
GO:0006272	leading strand elongation	4							0.02
GO:0006635	fatty acid beta-oxidation	34					0.02
GO:0006679	glucosylceramide biosynthetic process	3					0.02
GO:0006688	glycosphingolipid biosynthetic process	3					0.02
GO:0006729	tetrahydrobiopterin biosynthetic process	9								0.02
GO:0006814	sodium ion transport	34					0.02
GO:0006880	intracellular sequestering of iron ion	9								0.02
GO:0009062	fatty acid catabolic process	35					0.02
GO:0009635	response to herbicide	5							0.02
GO:0009799	specification of symmetry	2						0.02
GO:0009855	determination of bilateral symmetry	2						0.02
GO:0009953	dorsal/ventral pattern formation	2						0.02
GO:0009962	regulation of flavonoid biosynthetic process	4							0.02
GO:0010135	ureide metabolic process	4					0.02
GO:0010136	ureide catabolic process	4					0.02
GO:0010162	seed dormancy process	6							0.03	0.01
GO:0019395	fatty acid oxidation	35					0.02
GO:0022611	dormancy process	6							0.03	0.01
GO:0034311	diol metabolic process	11								0.02
GO:0034312	diol biosynthetic process	11								0.02
GO:0034440	lipid oxidation	39					0.02
GO:0035966	response to topologically incorrect protein	33					0.02
GO:0035967	cellular response to topologically incorrect protein	33					0.02
GO:0036503	ERAD pathway	38					0.02
GO:0043067	regulation of programmed cell death	26						0.02
GO:0043269	regulation of ion transport	33					0.02
GO:0045128	negative regulation of reciprocal meiotic recombination	4							0.02
GO:0045835	negative regulation of meiotic nuclear division	5							0.02
GO:0046037	GMP metabolic process	9								0.02
GO:0046146	tetrahydrobiopterin metabolic process	9								0.02
GO:0046476	glycosylceramide biosynthetic process	3					0.02
GO:0048262	determination of dorsal/ventral asymmetry	2						0.02
GO:0048263	determination of dorsal identity	2						0.02
GO:0048871	multicellular organismal homeostasis	3					0.02
GO:0050992	dimethylallyl diphosphate biosynthetic process	4					0.02
GO:0050993	dimethylallyl diphosphate metabolic process	4					0.02
GO:0051238	sequestering of metal ion	9								0.02
GO:0051447	negative regulation of meiotic cell cycle	5							0.02
GO:0097009	energy homeostasis	3					0.02
GO:0097577	sequestering of iron ion	9								0.02
GO:1900457	regulation of brassinosteroid mediated signaling pathway	14								0.02
GO:1900458	negative regulation of brassinosteroid mediated signaling pathway	9								0.02
GO:0009059	macromolecule biosynthetic process	4487						4.142e-07		0.04
GO:0034645	cellular macromolecule biosynthetic process	4439						2.096e-06		0.04
GO:0016052	carbohydrate catabolic process	439					0.001737			0.04	0.02
GO:0009110	vitamin biosynthetic process	154						0.003045	0.04			0.01
GO:0006766	vitamin metabolic process	160						0.003673	0.04			0.01
GO:2000070	regulation of response to water deprivation	26							0.006582	0.04
GO:0009845	seed germination	39						0.05		6.006e-07
GO:0010029	regulation of seed germination	29							0.0003386	0.05	0.02
GO:1900140	regulation of seedling development	29							0.0003386	0.05	0.02
GO:0051049	regulation of transport	90					0.002356	0.05
GO:0042180	cellular ketone metabolic process	75						0.005015	0.05
GO:0000255	allantoin metabolic process	5					0.03
GO:0000911	cytokinesis by cell plate formation	19								0.03
GO:0006086	acetyl-CoA biosynthetic process from pyruvate	20								0.03
GO:0006223	uracil salvage	3						0.03
GO:0006833	water transport	27						0.03
GO:0006879	cellular iron ion homeostasis	21								0.03
GO:0009233	menaquinone metabolic process	6							0.03
GO:0009234	menaquinone biosynthetic process	6							0.03
GO:0009396	folic acid-containing compound biosynthetic process	29						0.03
GO:0010236	plastoquinone biosynthetic process	3						0.03
GO:0010322	regulation of isopentenyl diphosphate biosynthetic process, methylerythritol 4-phosphate pathway	5					0.03
GO:0010520	regulation of reciprocal meiotic recombination	6							0.03
GO:0017062	respiratory chain complex III assembly	6							0.03
GO:0019408	dolichol biosynthetic process	5					0.03
GO:0032543	mitochondrial translation	31						0.03
GO:0034551	mitochondrial respiratory chain complex III assembly	6							0.03
GO:0042044	fluid transport	27						0.03
GO:0043100	pyrimidine nucleobase salvage	3						0.03
GO:0043650	dicarboxylic acid biosynthetic process	33					0.02	0.04
GO:0044070	regulation of anion transport	5					0.03
GO:0046107	uracil biosynthetic process	3						0.03
GO:0046176	aldonic acid catabolic process	3						0.03
GO:0046177	D-gluconate catabolic process	3						0.03
GO:0048564	photosystem I assembly	28						0.03
GO:0070588	calcium ion transmembrane transport	47					0.03
GO:0080060	integument development	3						0.03
GO:0090322	regulation of superoxide metabolic process	3						0.03
GO:2000071	regulation of defense response by callose deposition	3						0.03
GO:0006085	acetyl-CoA biosynthetic process	26								0.04
GO:0006168	adenine salvage	9							0.04
GO:0006526	arginine biosynthetic process	27								0.04
GO:0008614	pyridoxine metabolic process	9							0.04
GO:0008615	pyridoxine biosynthetic process	9							0.04
GO:0010264	myo-inositol hexakisphosphate biosynthetic process	6					0.04
GO:0010923	negative regulation of phosphatase activity	25								0.04
GO:0016094	polyprenol biosynthetic process	7					0.04
GO:0019860	uracil metabolic process	5						0.04
GO:0032515	negative regulation of phosphoprotein phosphatase activity	24								0.04
GO:0033517	myo-inositol hexakisphosphate metabolic process	6					0.04
GO:0035305	negative regulation of dephosphorylation	25								0.04
GO:0035308	negative regulation of protein dephosphorylation	24								0.04
GO:0042559	pteridine-containing compound biosynthetic process	37						0.04
GO:0043096	purine nucleobase salvage	9							0.04
GO:0043605	cellular amide catabolic process	6					0.04
GO:0046083	adenine metabolic process	9							0.04
GO:0046084	adenine biosynthetic process	9							0.04
GO:0046113	nucleobase catabolic process	7					0.04
GO:0048830	adventitious root development	4						0.04
GO:0072329	monocarboxylic acid catabolic process	48					0.04
GO:0080148	negative regulation of response to water deprivation	5						0.04
GO:1905183	negative regulation of protein serine/threonine phosphatase activity	9							0.04
GO:0006415	translational termination	39						0.05
GO:0009085	lysine biosynthetic process	29								0.05
GO:0009089	lysine biosynthetic process via diaminopimelate	29								0.05
GO:0019348	dolichol metabolic process	8					0.05
GO:0040020	regulation of meiotic nuclear division	10							0.05
GO:0045489	pectin biosynthetic process	39						0.05
GO:0046173	polyol biosynthetic process	28								0.05
GO:0046451	diaminopimelate metabolic process	29								0.05
GO:0046513	ceramide biosynthetic process	8					0.05
GO:0051788	response to misfolded protein	8					0.05
GO:0055062	phosphate ion homeostasis	8					0.05
GO:0055072	iron ion homeostasis	29								0.05
GO:0055081	anion homeostasis	8					0.05
GO:0071071	regulation of phospholipid biosynthetic process	8					0.05
GO:0071218	cellular response to misfolded protein	8					0.05
GO:0071712	ER-associated misfolded protein catabolic process	8					0.05
GO:0072506	trivalent inorganic anion homeostasis	8					0.05
GO:1903725	regulation of phospholipid metabolic process	8					0.05
GO:0048582	positive regulation of post-embryonic development	36									0.03	0.0001875
GO:0006022	aminoglycan metabolic process	76									5.796e-19
GO:0006026	aminoglycan catabolic process	76									5.796e-19
GO:0006030	chitin metabolic process	76									5.796e-19
GO:0006032	chitin catabolic process	76									5.796e-19
GO:0046348	amino sugar catabolic process	76									5.796e-19
GO:1901072	glucosamine-containing compound catabolic process	76									5.796e-19
GO:1901071	glucosamine-containing compound metabolic process	79									1.131e-18
GO:0016998	cell wall macromolecule catabolic process	91									1.257e-17
GO:0006040	amino sugar metabolic process	98									4.36e-17
GO:1901136	carbohydrate derivative catabolic process	144									2.307e-14
GO:1901565	organonitrogen compound catabolic process	1167									5.62e-10
GO:0044265	cellular macromolecule catabolic process	1035									5.196e-06
GO:1901575	organic substance catabolic process	2138									7.752e-06
GO:0044248	cellular catabolic process	2292									7.428e-05
GO:0009057	macromolecule catabolic process	1272									0.0001221
GO:0033609	oxalate metabolic process	3									0.0001676
GO:0033611	oxalate catabolic process	3									0.0001676
GO:0009698	phenylpropanoid metabolic process	157									0.0001988
GO:0042537	benzene-containing compound metabolic process	71									0.0002018
GO:0001906	cell killing	4									0.0003335
GO:0031640	killing of cells of other organism	4									0.0003335
GO:0072488	ammonium transmembrane transport	21									0.0005045
GO:0019748	secondary metabolic process	195									0.0007304
GO:0030042	actin filament depolymerization	26									0.0009591
GO:0051261	protein depolymerization	26									0.0009591
GO:0090501	RNA phosphodiester bond hydrolysis	62									0.001237
GO:0010030	positive regulation of seed germination	8									0.001525
GO:0043624	cellular protein complex disassembly	68									0.001744
GO:0009056	catabolic process	2844									0.00182
GO:0008154	actin polymerization or depolymerization	34									0.002112
GO:0009723	response to ethylene	72									0.002152
GO:0032984	protein-containing complex disassembly	80									0.003156
GO:0010214	seed coat development	12									0.003525
GO:0043649	dicarboxylic acid catabolic process	12									0.003525
GO:0019439	aromatic compound catabolic process	405									0.003843
GO:0009626	plant-type hypersensitive response	13									0.004145
GO:0034050	programmed cell death induced by symbiont	13									0.004145
GO:1901361	organic cyclic compound catabolic process	410									0.00416
GO:0009813	flavonoid biosynthetic process	15									0.005525
GO:0051702	biological process involved in interaction with symbiont	15									0.005525
GO:0009082	branched-chain amino acid biosynthetic process	48									0.005648
GO:0009812	flavonoid metabolic process	16									0.006283
GO:0022411	cellular component disassembly	98									0.006488
GO:0012501	programmed cell death	17									0.007086
GO:0072330	monocarboxylic acid biosynthetic process	382									0.008775
GO:0009081	branched-chain amino acid metabolic process	58									0.009537
GO:0000719	photoreactive repair	2									0.01
GO:0006560	proline metabolic process	21									0.01
GO:0016226	iron-sulfur cluster assembly	61									0.01
GO:0031163	metallo-sulfur cluster assembly	61									0.01
GO:0044403	biological process involved in symbiotic interaction	24									0.01
GO:1901135	carbohydrate derivative metabolic process	1440									0.01
GO:0008219	cell death	28									0.02
GO:0033356	UDP-L-arabinose metabolic process	3									0.02
GO:0051301	cell division	140									0.02
GO:0090305	nucleic acid phosphodiester bond hydrolysis	139									0.02
GO:0009650	UV protection	4									0.03
GO:0015698	inorganic anion transport	161									0.03
GO:0016108	tetraterpenoid metabolic process	39									0.03
GO:0016109	tetraterpenoid biosynthetic process	33									0.03
GO:0016116	carotenoid metabolic process	39									0.03
GO:0016117	carotenoid biosynthetic process	33									0.03
GO:0045087	innate immune response	39									0.03
GO:0006290	pyrimidine dimer repair	5									0.04
GO:0006955	immune response	41									0.04
GO:0009086	methionine biosynthetic process	42									0.04
GO:0031407	oxylipin metabolic process	43									0.04
GO:0031408	oxylipin biosynthetic process	42									0.04
GO:0062034	L-pipecolic acid biosynthetic process	5									0.04
GO:0045454	cell redox homeostasis	317										2.367e-20
GO:0042592	homeostatic process	572										2.113e-15
GO:0065008	regulation of biological quality	877										6.223e-13
GO:0019354	siroheme biosynthetic process	3										2.83e-08
GO:0046156	siroheme metabolic process	3										2.83e-08
GO:0048572	short-day photoperiodism	3										2.83e-08
GO:0048576	positive regulation of short-day photoperiodism, flowering	3										2.83e-08
GO:0009235	cobalamin metabolic process	9										2.345e-06
GO:0009236	cobalamin biosynthetic process	9										2.345e-06
GO:0048571	long-day photoperiodism	9										2.345e-06
GO:0048587	regulation of short-day photoperiodism, flowering	12										6.1e-06
GO:0048579	negative regulation of long-day photoperiodism, flowering	19										2.644e-05
GO:0009648	photoperiodism	23										4.79e-05
GO:0006662	glycerol ether metabolic process	65										4.999e-05
GO:0018904	ether metabolic process	65										4.999e-05
GO:2000243	positive regulation of reproductive process	26										6.984e-05
GO:0048586	regulation of long-day photoperiodism, flowering	37										0.0002036
GO:0048268	clathrin coat assembly	40										0.0002571
GO:0006783	heme biosynthetic process	47										0.0004154
GO:0051240	positive regulation of multicellular organismal process	51										0.0005287
GO:2000028	regulation of photoperiodism, flowering	56										0.0006959
GO:0042168	heme metabolic process	57										0.0007329
GO:0051094	positive regulation of developmental process	58										0.0007711
GO:0006541	glutamine metabolic process	73										0.001503
GO:0000105	histidine biosynthetic process	21										0.001885
GO:0006547	histidine metabolic process	21										0.001885
GO:0009067	aspartate family amino acid biosynthetic process	88										0.002564
GO:0009909	regulation of flower development	94										0.00309
GO:0048831	regulation of shoot system development	98										0.003475
GO:0009066	aspartate family amino acid metabolic process	103										0.003995
GO:0006470	protein dephosphorylation	241										0.006663
GO:0048868	pollen tube development	44										0.008107
GO:0042364	water-soluble vitamin biosynthetic process	134										0.008266
GO:0006767	water-soluble vitamin metabolic process	140										0.009311
GO:0006098	pentose-phosphate shunt	48										0.00959
GO:0006740	NADPH regeneration	48										0.00959
GO:0051156	glucose 6-phosphate metabolic process	49										0.009978
GO:0009064	glutamine family amino acid metabolic process	164										0.01
GO:0046148	pigment biosynthetic process	148										0.01
GO:0006739	NADP metabolic process	66										0.02
GO:0042440	pigment metabolic process	176										0.02
GO:2000241	regulation of reproductive process	182										0.02
GO:0000097	sulfur amino acid biosynthetic process	90										0.03
GO:0006809	nitric oxide biosynthetic process	9										0.03
GO:0016311	dephosphorylation	392										0.03
GO:0046209	nitric oxide metabolic process	9										0.03
GO:0009312	oligosaccharide biosynthetic process	99										0.04
GO:0030968	endoplasmic reticulum unfolded protein response	14										0.04

## Sheet: P0001BP
Gene Count:	1102
Background Gene Count:	75477
Ontology:	E:\GOAnalyzer\Deployment\Data\gofiles\go-basic.obo
Annotation:	E:\GOAnalyzer\Deployment\data\gofiles\Gene-GO_association.wheat2022
Hierarchy:	biological_process
Correction:	BH FDR p-value adjustment
Max Path Length From Leaf:	N/A
Min Path Length From Root:	3
GO ID	Description	P-Value	Corrected P-Value	Total Genes	Matched Gene Counts	Matched Genes
GO:0044085	cellular component biogenesis	1.778e-08	2.101e-08	1818	59 (3.25%)	TraesCS2A03G0229400;TraesCS7B03G0877500;TraesCS2D03G0644100;TraesCS1B03G0982500;TraesCS1B03G0788000;TraesCS5A03G0785100;TraesCS2B03G1153800;TraesCS7D03G0624900;TraesCS1A03G0691100;TraesCS3A03G0446500;TraesCS7B03G0917200;TraesCS6B03G1260400;TraesCS7B03G0876600;TraesCS1B03G0841400;TraesCS2B03G1463600;TraesCS4D03G0331800;TraesCS7A03G1035500;TraesCS3B03G0108500;TraesCS6A03G0713400;TraesCS3B03G0108300…
GO:0006575	cellular modified amino acid metabolic process	3.548e-08	4.192e-08	464	25 (5.39%)	TraesCS3D03G0686300;TraesCS5B03G1172800;TraesCS1B03G0139900;TraesCS1A03G0501900;TraesCS4A03G0045900;TraesCS1D03G0221300;TraesCS4B03G0857300;TraesCS4D03G0493400;TraesCS3D03G0978800;TraesCS1D03G0221500;TraesCS2A03G0129000;TraesCS3A03G1049300;TraesCS3D03G0337600;TraesCS1B03G0574900;TraesCS2D03G1101000;TraesCS1B03G0574500;TraesCS2B03G1308200;TraesCS2A03G1152000;TraesCS1D03G0486300;TraesCS3D03G1077900…
GO:0006564	L-serine biosynthetic process	6.754e-08	7.978e-08	16	6 (37.5%)	TraesCS7A03G0399200;TraesCS7D03G1144000;TraesCS4A03G0060100;TraesCS7B03G1078600;TraesCS7B03G0199600;TraesCS2A03G1182500
GO:0010410	hemicellulose metabolic process	1.044e-07	1.233e-07	210	16 (7.62%)	TraesCS7B03G0876600;TraesCS7A03G1037700;TraesCS7A03G1035500;TraesCS7B03G0877500;TraesCS3D03G1089500;TraesCS7A03G1073700;TraesCS7B03G0876800;TraesCS7D03G0991300;TraesCS2B03G1153800;TraesCS7D03G0992500;TraesCS7D03G0991100;TraesCS7D03G1023900;TraesCS7B03G0917200;TraesCS3B03G1276900;TraesCS2A03G0923600;TraesCS6B03G1260400
GO:0010383	cell wall polysaccharide metabolic process	1.743e-07	2.058e-07	218	16 (7.34%)	TraesCS7B03G0876600;TraesCS7A03G1037700;TraesCS7A03G1035500;TraesCS7B03G0877500;TraesCS3D03G1089500;TraesCS7A03G1073700;TraesCS7B03G0876800;TraesCS7D03G0991300;TraesCS2B03G1153800;TraesCS7D03G0992500;TraesCS7D03G0991100;TraesCS7D03G1023900;TraesCS7B03G0917200;TraesCS3B03G1276900;TraesCS2A03G0923600;TraesCS6B03G1260400
GO:0006457	protein folding	5.203e-07	6.141e-07	361	20 (5.54%)	TraesCS2D03G0714700;TraesCS1A03G0565000;TraesCS2B03G0419300;TraesCS6B03G1050700;TraesCS3B03G0108500;TraesCS5A03G0733900;TraesCS1B03G0473000;TraesCS1D03G0542400;TraesCS3B03G0108300;TraesCS4A03G0569900;TraesCS7D03G0654000;TraesCS5A03G0796500;TraesCS6A03G0877100;TraesCS5D03G0696400;TraesCS1D03G0166300;TraesCS6D03G0748600;TraesCS1B03G0020700;TraesCS1D03G0364300;TraesCS1D03G0010900;TraesCS1A03G0391400
GO:0071840	cellular component organization or biogenesis	6.149e-07	7.256e-07	3537	89 (2.52%)	TraesCS2A03G0229400;TraesCS2B03G1296100;TraesCS7B03G0877500;TraesCS4A03G0608900;TraesCS4B03G1000000;TraesCS5B03G1168500;TraesCS2D03G0644100;TraesCS6A03G0729500;TraesCS6D03G0011000;TraesCS1B03G0982500;TraesCS2B03G0320600;TraesCS5D03G0369100;TraesCS1B03G0788000;TraesCS5A03G0785100;TraesCS2B03G1153800;TraesCS7D03G0624900;TraesCS1A03G0691100;TraesCS3A03G0446500;TraesCS2D03G0749200;TraesCS7B03G0917200…
GO:0006563	L-serine metabolic process	1.38e-06	1.628e-06	74	9 (12.16%)	TraesCS2A03G1152000;TraesCS7A03G0399200;TraesCS7D03G1144000;TraesCS4A03G0060100;TraesCS2D03G1101000;TraesCS7B03G1078600;TraesCS7B03G0199600;TraesCS2A03G1182500;TraesCS2B03G1308200
GO:0009070	serine family amino acid biosynthetic process	2.162e-06	2.549e-06	78	9 (11.54%)	TraesCS2A03G1152000;TraesCS7A03G0399200;TraesCS7D03G1144000;TraesCS4A03G0060100;TraesCS2D03G1101000;TraesCS7B03G1078600;TraesCS7B03G0199600;TraesCS2A03G1182500;TraesCS2B03G1308200
GO:0044281	small molecule metabolic process	2.334e-06	2.752e-06	3180	80 (2.52%)	TraesCS5B03G1172800;TraesCS6B03G0732400;TraesCS6A03G0924100;TraesCS6A03G0601600;TraesCS1D03G0544900;TraesCS6A03G0193300;TraesCS2B03G0104900;TraesCS3B03G0052400;TraesCS1D03G0358300;TraesCS7A03G0571800;TraesCS5A03G0800900;TraesCS6B03G0634300;TraesCS4D03G0639000;TraesCS2D03G0804700;TraesCS7A03G0545200;TraesCS4B03G0335600;TraesCS6D03G0525200;TraesCS3D03G1185400;TraesCS7A03G1037400;TraesCS1D03G0881300…
GO:0006749	glutathione metabolic process	2.418e-06	2.85e-06	399	20 (5.01%)	TraesCS3D03G0686300;TraesCS1B03G0139900;TraesCS1A03G0501900;TraesCS1B03G0574900;TraesCS4A03G0045900;TraesCS1B03G0574500;TraesCS1D03G0221300;TraesCS1D03G0486300;TraesCS3D03G1077900;TraesCS4B03G0857300;TraesCS4D03G0493400;TraesCS3D03G0978800;TraesCS1D03G0221500;TraesCS2A03G0129000;TraesCS6B03G1189600;TraesCS1A03G0249300;TraesCS4D03G0492800;TraesCS5D03G0473100;TraesCS3A03G1049300;TraesCS3D03G0686600
GO:0044036	cell wall macromolecule metabolic process	2.806e-06	3.307e-06	301	17 (5.65%)	TraesCS7B03G0876600;TraesCS7A03G1037700;TraesCS7A03G1035500;TraesCS7B03G0877500;TraesCS3D03G1089500;TraesCS7A03G1073700;TraesCS7B03G0876800;TraesCS7D03G0991300;TraesCS2B03G1153800;TraesCS7D03G0992500;TraesCS7D03G0991100;TraesCS7D03G1023900;TraesCS7B03G0917200;TraesCS3B03G1276900;TraesCS7B03G0380700;TraesCS2A03G0923600;TraesCS6B03G1260400
GO:0034404	nucleobase-containing small molecule biosynthetic process	3.516e-06	4.143e-06	17	5 (29.41%)	TraesCS6B03G0732400;TraesCS6A03G0601600;TraesCS6D03G0525200;TraesCS6A03G0617100;TraesCS6D03G0505200
GO:0009163	nucleoside biosynthetic process	3.516e-06	4.143e-06	17	5 (29.41%)	TraesCS6B03G0732400;TraesCS6A03G0601600;TraesCS6D03G0525200;TraesCS6A03G0617100;TraesCS6D03G0505200
GO:0042451	purine nucleoside biosynthetic process	3.516e-06	4.143e-06	17	5 (29.41%)	TraesCS6B03G0732400;TraesCS6A03G0601600;TraesCS6D03G0525200;TraesCS6A03G0617100;TraesCS6D03G0505200
GO:0042455	ribonucleoside biosynthetic process	3.516e-06	4.143e-06	17	5 (29.41%)	TraesCS6B03G0732400;TraesCS6A03G0601600;TraesCS6D03G0525200;TraesCS6A03G0617100;TraesCS6D03G0505200
GO:0046129	purine ribonucleoside biosynthetic process	3.516e-06	4.143e-06	17	5 (29.41%)	TraesCS6B03G0732400;TraesCS6A03G0601600;TraesCS6D03G0525200;TraesCS6A03G0617100;TraesCS6D03G0505200
GO:0016043	cellular component organization	3.94e-06	4.641e-06	3068	77 (2.51%)	TraesCS2A03G0229400;TraesCS2B03G1296100;TraesCS4A03G0608900;TraesCS4B03G1000000;TraesCS5B03G1168500;TraesCS6A03G0729500;TraesCS6D03G0011000;TraesCS1B03G0982500;TraesCS2B03G0320600;TraesCS5D03G0369100;TraesCS1B03G0788000;TraesCS5A03G0785100;TraesCS2B03G1153800;TraesCS7D03G0624900;TraesCS1A03G0691100;TraesCS3A03G0446500;TraesCS2D03G0749200;TraesCS6B03G1260400;TraesCS7B03G0876600;TraesCS1B03G0841400…
GO:0022607	cellular component assembly	4.27e-06	5.029e-06	1198	39 (3.26%)	TraesCS1B03G0263000;TraesCS2A03G0229400;TraesCS6B03G0186600;TraesCS6D03G0396800;TraesCS1B03G0515500;TraesCS4B03G0454300;TraesCS1B03G0982500;TraesCS5A03G0835900;TraesCS1B03G0788000;TraesCS4D03G0361400;TraesCS5A03G0785100;TraesCS3D03G0779100;TraesCS7D03G0624900;TraesCS1A03G0691100;TraesCS3A03G0446500;TraesCS6B03G0629000;TraesCS1B03G0654200;TraesCS1B03G1049800;TraesCS1B03G0841400;TraesCS2B03G1463600…
GO:1901659	glycosyl compound biosynthetic process	6.449e-06	7.593e-06	19	5 (26.32%)	TraesCS6B03G0732400;TraesCS6A03G0601600;TraesCS6D03G0525200;TraesCS6A03G0617100;TraesCS6D03G0505200
GO:0009069	serine family amino acid metabolic process	9.941e-06	1.17e-05	118	10 (8.47%)	TraesCS2A03G1152000;TraesCS7A03G0399200;TraesCS7D03G1144000;TraesCS4A03G0060100;TraesCS2D03G1101000;TraesCS7B03G1078600;TraesCS7B03G0199600;TraesCS2A03G1182500;TraesCS6A03G0397300;TraesCS2B03G1308200
GO:0010035	response to inorganic substance	1.126e-05	1.325e-05	519	22 (4.24%)	TraesCS1B03G0263000;TraesCS6B03G0186600;TraesCS1B03G0841400;TraesCS3B03G0108500;TraesCS4A03G0852200;TraesCS4B03G0759800;TraesCS1A03G1031600;TraesCS3B03G0108300;TraesCS7D03G0509700;TraesCS1D03G0953700;TraesCS5A03G0835900;TraesCS5B03G0875800;TraesCS3A03G0933300;TraesCS4D03G0528000;TraesCS2A03G1241200;TraesCS6D03G0773900;TraesCS1B03G0882400;TraesCS5B03G0217600;TraesCS4A03G0180900;TraesCS7B03G0347800…
GO:0033108	mitochondrial respiratory chain complex assembly	1.28e-05	1.506e-05	36	6 (16.67%)	TraesCS2A03G0229400;TraesCS2D03G0235500;TraesCS7D03G0624900;TraesCS7B03G0469000;TraesCS7D03G1033100;TraesCS1B03G0654200
GO:0009119	ribonucleoside metabolic process	1.509e-05	1.775e-05	37	6 (16.22%)	TraesCS6B03G0732400;TraesCS6A03G0601600;TraesCS3A03G0640300;TraesCS6D03G0525200;TraesCS6A03G0617100;TraesCS6D03G0505200
GO:1901605	alpha-amino acid metabolic process	1.802e-05	2.119e-05	575	23 (4%)	TraesCS5B03G1172800;TraesCS3A03G0046100;TraesCS4A03G0060100;TraesCS2D03G1101000;TraesCS7B03G1078600;TraesCS7D03G0914900;TraesCS3B03G0052400;TraesCS3D03G0041800;TraesCS3B03G0831500;TraesCS6A03G0397300;TraesCS2B03G1308200;TraesCS2A03G1152000;TraesCS3A03G0609400;TraesCS7A03G0399200;TraesCS5D03G0077800;TraesCS7A03G0949600;TraesCS7D03G1144000;TraesCS2B03G1015200;TraesCS7B03G0671400;TraesCS1A03G0874600…
GO:0065003	protein-containing complex assembly	1.808e-05	2.126e-05	913	31 (3.4%)	TraesCS1B03G0263000;TraesCS2A03G0229400;TraesCS6B03G0186600;TraesCS4B03G0454300;TraesCS1B03G0982500;TraesCS5A03G0835900;TraesCS4D03G0361400;TraesCS5A03G0785100;TraesCS3D03G0779100;TraesCS7D03G0624900;TraesCS3A03G0446500;TraesCS6B03G0629000;TraesCS1B03G0654200;TraesCS1B03G1049800;TraesCS1B03G0841400;TraesCS3B03G0108500;TraesCS7A03G0751500;TraesCS7B03G0469000;TraesCS3B03G0108300;TraesCS5B03G0875800…
GO:0007005	mitochondrion organization	1.945e-05	2.287e-05	184	12 (6.52%)	TraesCS2A03G0229400;TraesCS2D03G0235500;TraesCS6D03G0611700;TraesCS5A03G0199200;TraesCS7D03G0624900;TraesCS7B03G0469000;TraesCS4B03G0536000;TraesCS6A03G0729500;TraesCS7D03G1033100;TraesCS2D03G0749200;TraesCS4A03G0086300;TraesCS1B03G0654200
GO:0044283	small molecule biosynthetic process	2.123e-05	2.495e-05	1101	35 (3.18%)	TraesCS6B03G0732400;TraesCS4A03G0060100;TraesCS6A03G0601600;TraesCS1D03G0544900;TraesCS1A03G0606500;TraesCS2A03G0926800;TraesCS7A03G0949600;TraesCS5A03G0800900;TraesCS4D03G0639000;TraesCS2D03G0804700;TraesCS7A03G0545200;TraesCS6D03G0525200;TraesCS3D03G1185400;TraesCS7A03G1037400;TraesCS5B03G0833900;TraesCS3D03G0337600;TraesCS1D03G0581300;TraesCS5D03G0063200;TraesCS2D03G1101000;TraesCS7B03G1078600…
GO:0006082	organic acid metabolic process	2.283e-05	2.682e-05	1975	53 (2.68%)	TraesCS5B03G1172800;TraesCS6A03G0924100;TraesCS1D03G0544900;TraesCS6A03G0193300;TraesCS3B03G0052400;TraesCS5A03G0800900;TraesCS4D03G0639000;TraesCS3D03G1185400;TraesCS1D03G0881300;TraesCS3A03G0046100;TraesCS3D03G0337600;TraesCS1D03G0581300;TraesCS6A03G0872300;TraesCS2D03G1101000;TraesCS5D03G0860800;TraesCS6B03G0433700;TraesCS3D03G0041800;TraesCS5D03G0303800;TraesCS2B03G1308200;TraesCS7A03G0399200…
GO:0001192	maintenance of transcriptional fidelity during DNA-templated transcription elongation	3.037e-05	3.566e-05	5	3 (60%)	TraesCS5B03G0240100;TraesCS5D03G0238900;TraesCS5A03G0225300
GO:0001193	maintenance of transcriptional fidelity during DNA-templated transcription elongation from RNA polymerase II promoter	3.037e-05	3.566e-05	5	3 (60%)	TraesCS5B03G0240100;TraesCS5D03G0238900;TraesCS5A03G0225300
GO:0042546	cell wall biogenesis	3.189e-05	3.745e-05	327	16 (4.89%)	TraesCS7B03G0876600;TraesCS7A03G1037700;TraesCS7A03G1035500;TraesCS7B03G0877500;TraesCS3D03G1089500;TraesCS7A03G1073700;TraesCS7B03G0876800;TraesCS7D03G0991300;TraesCS2B03G1153800;TraesCS7D03G0992500;TraesCS7D03G0991100;TraesCS7D03G1023900;TraesCS6B03G0988400;TraesCS7B03G0917200;TraesCS2A03G0923600;TraesCS6B03G1260400
GO:0006790	sulfur compound metabolic process	3.564e-05	4.183e-05	770	27 (3.51%)	TraesCS3D03G0686300;TraesCS5B03G1172800;TraesCS6B03G0732400;TraesCS1B03G0139900;TraesCS1A03G0501900;TraesCS6A03G0601600;TraesCS4A03G0045900;TraesCS1D03G0221300;TraesCS4B03G0857300;TraesCS4D03G0493400;TraesCS3D03G0978800;TraesCS1D03G0221500;TraesCS2A03G0129000;TraesCS3A03G1049300;TraesCS2B03G1463600;TraesCS1B03G0574900;TraesCS5D03G0860800;TraesCS1B03G0574500;TraesCS1D03G0486300;TraesCS3D03G1077900…
GO:0019752	carboxylic acid metabolic process	3.979e-05	4.67e-05	1916	51 (2.66%)	TraesCS5B03G1172800;TraesCS6A03G0924100;TraesCS1D03G0544900;TraesCS6A03G0193300;TraesCS3B03G0052400;TraesCS5A03G0800900;TraesCS4D03G0639000;TraesCS3D03G1185400;TraesCS1D03G0881300;TraesCS3A03G0046100;TraesCS3D03G0337600;TraesCS1D03G0581300;TraesCS6A03G0872300;TraesCS2D03G1101000;TraesCS5D03G0860800;TraesCS6B03G0433700;TraesCS3D03G0041800;TraesCS5D03G0303800;TraesCS2B03G1308200;TraesCS7A03G0399200…
GO:0043436	oxoacid metabolic process	5.029e-05	5.901e-05	1934	51 (2.64%)	TraesCS5B03G1172800;TraesCS6A03G0924100;TraesCS1D03G0544900;TraesCS6A03G0193300;TraesCS3B03G0052400;TraesCS5A03G0800900;TraesCS4D03G0639000;TraesCS3D03G1185400;TraesCS1D03G0881300;TraesCS3A03G0046100;TraesCS3D03G0337600;TraesCS1D03G0581300;TraesCS6A03G0872300;TraesCS2D03G1101000;TraesCS5D03G0860800;TraesCS6B03G0433700;TraesCS3D03G0041800;TraesCS5D03G0303800;TraesCS2B03G1308200;TraesCS7A03G0399200…
GO:0035999	tetrahydrofolate interconversion	5.426e-05	6.365e-05	15	4 (26.67%)	TraesCS2A03G1152000;TraesCS5B03G1172800;TraesCS2D03G1101000;TraesCS2B03G1308200
GO:0006520	cellular amino acid metabolic process	6.088e-05	7.14e-05	1067	33 (3.09%)	TraesCS1A03G0902800;TraesCS5B03G1172800;TraesCS6A03G0924100;TraesCS4A03G0060100;TraesCS1D03G0544900;TraesCS3B03G0052400;TraesCS6A03G0376800;TraesCS3B03G0831500;TraesCS6A03G0397300;TraesCS7A03G0949600;TraesCS5A03G0332600;TraesCS1D03G0881300;TraesCS3A03G0046100;TraesCS6A03G0872300;TraesCS2D03G1101000;TraesCS7B03G1078600;TraesCS7D03G0914900;TraesCS6B03G0433700;TraesCS3D03G0041800;TraesCS6D03G0290400…
GO:0010411	xyloglucan metabolic process	7.021e-05	8.232e-05	148	10 (6.76%)	TraesCS7B03G0876600;TraesCS7A03G1037700;TraesCS7D03G0991300;TraesCS2B03G1153800;TraesCS7A03G1035500;TraesCS7B03G0877500;TraesCS7D03G0992500;TraesCS7D03G0991100;TraesCS6B03G1260400;TraesCS7B03G0876800
GO:0044264	cellular polysaccharide metabolic process	8.516e-05	9.982e-05	512	20 (3.91%)	TraesCS7B03G0876600;TraesCS7A03G1037700;TraesCS7A03G1035500;TraesCS7B03G0877500;TraesCS1B03G0726800;TraesCS3D03G1089500;TraesCS7A03G1073700;TraesCS7B03G0876800;TraesCS7D03G0991300;TraesCS2B03G1153800;TraesCS3A03G0933300;TraesCS7D03G0992500;TraesCS7D03G0991100;TraesCS7D03G1023900;TraesCS7D03G0991000;TraesCS7B03G0917200;TraesCS1B03G0659600;TraesCS3B03G1276900;TraesCS2A03G0923600;TraesCS6B03G1260400
GO:0043933	protein-containing complex subunit organization	0.0001052	0.0001233	1005	31 (3.08%)	TraesCS1B03G0263000;TraesCS2A03G0229400;TraesCS6B03G0186600;TraesCS4B03G0454300;TraesCS1B03G0982500;TraesCS5A03G0835900;TraesCS4D03G0361400;TraesCS5A03G0785100;TraesCS3D03G0779100;TraesCS7D03G0624900;TraesCS3A03G0446500;TraesCS6B03G0629000;TraesCS1B03G0654200;TraesCS1B03G1049800;TraesCS1B03G0841400;TraesCS3B03G0108500;TraesCS7A03G0751500;TraesCS7B03G0469000;TraesCS3B03G0108300;TraesCS5B03G0875800…
GO:0042278	purine nucleoside metabolic process	0.0001287	0.0001508	34	5 (14.71%)	TraesCS6B03G0732400;TraesCS6A03G0601600;TraesCS6D03G0525200;TraesCS6A03G0617100;TraesCS6D03G0505200
GO:0046128	purine ribonucleoside metabolic process	0.0001287	0.0001508	34	5 (14.71%)	TraesCS6B03G0732400;TraesCS6A03G0601600;TraesCS6D03G0525200;TraesCS6A03G0617100;TraesCS6D03G0505200
GO:0034622	cellular protein-containing complex assembly	0.0001519	0.0001779	841	27 (3.21%)	TraesCS1B03G0263000;TraesCS2A03G0229400;TraesCS6B03G0186600;TraesCS4B03G0454300;TraesCS1B03G0982500;TraesCS5A03G0835900;TraesCS4D03G0361400;TraesCS5A03G0785100;TraesCS3D03G0779100;TraesCS7D03G0624900;TraesCS3A03G0446500;TraesCS6B03G0629000;TraesCS1B03G0654200;TraesCS1B03G1049800;TraesCS1B03G0841400;TraesCS7A03G0751500;TraesCS7B03G0469000;TraesCS5B03G0875800;TraesCS3D03G1159800;TraesCS1B03G0636600…
GO:0006283	transcription-coupled nucleotide-excision repair	0.0001646	0.0001927	8	3 (37.5%)	TraesCS5B03G0240100;TraesCS5D03G0238900;TraesCS5A03G0225300
GO:0046499	S-adenosylmethioninamine metabolic process	0.0001646	0.0001927	8	3 (37.5%)	TraesCS6B03G0732400;TraesCS6A03G0601600;TraesCS6D03G0505200
GO:0006557	S-adenosylmethioninamine biosynthetic process	0.0001646	0.0001927	8	3 (37.5%)	TraesCS6B03G0732400;TraesCS6A03G0601600;TraesCS6D03G0505200
GO:0043648	dicarboxylic acid metabolic process	0.0001675	0.000196	134	9 (6.72%)	TraesCS2A03G1152000;TraesCS3A03G0046100;TraesCS1A03G0874600;TraesCS1D03G0544900;TraesCS2D03G1101000;TraesCS3B03G0686400;TraesCS3B03G0052400;TraesCS6A03G0351700;TraesCS3D03G0041800
GO:0009415	response to water	0.0002089	0.0002445	308	14 (4.55%)	TraesCS1B03G0263000;TraesCS6B03G0186600;TraesCS1B03G0841400;TraesCS4A03G0852200;TraesCS1A03G1031600;TraesCS1D03G0953700;TraesCS5A03G0835900;TraesCS5B03G0875800;TraesCS4D03G0528000;TraesCS6D03G0773900;TraesCS1B03G0882400;TraesCS4A03G0180900;TraesCS6A03G0122300;TraesCS6A03G0684600
GO:0009414	response to water deprivation	0.0002301	0.0002692	274	13 (4.74%)	TraesCS1B03G0263000;TraesCS6B03G0186600;TraesCS1B03G0841400;TraesCS4A03G0852200;TraesCS1A03G1031600;TraesCS1D03G0953700;TraesCS5A03G0835900;TraesCS5B03G0875800;TraesCS4D03G0528000;TraesCS1B03G0882400;TraesCS4A03G0180900;TraesCS6A03G0122300;TraesCS6A03G0684600
GO:0001101	response to acid chemical	0.0002383	0.0002787	312	14 (4.49%)	TraesCS1B03G0263000;TraesCS6B03G0186600;TraesCS1B03G0841400;TraesCS4A03G0852200;TraesCS1A03G1031600;TraesCS1D03G0953700;TraesCS5A03G0835900;TraesCS5B03G0875800;TraesCS4D03G0528000;TraesCS6D03G0773900;TraesCS1B03G0882400;TraesCS4A03G0180900;TraesCS6A03G0122300;TraesCS6A03G0684600
GO:0006597	spermine biosynthetic process	0.0002441	0.0002855	9	3 (33.33%)	TraesCS6B03G0732400;TraesCS6A03G0601600;TraesCS6D03G0505200
GO:1901668	regulation of superoxide dismutase activity	0.0002441	0.0002855	9	3 (33.33%)	TraesCS6A03G0877100;TraesCS6B03G1050700;TraesCS6D03G0748600
GO:1901671	positive regulation of superoxide dismutase activity	0.0002441	0.0002855	9	3 (33.33%)	TraesCS6A03G0877100;TraesCS6B03G1050700;TraesCS6D03G0748600
GO:0034599	cellular response to oxidative stress	0.0002508	0.0002932	39	5 (12.82%)	TraesCS2A03G1241200;TraesCS3B03G0517500;TraesCS2D03G0830600;TraesCS7D03G0509700;TraesCS7B03G0347800
GO:0072527	pyrimidine-containing compound metabolic process	0.0002869	0.0003354	144	9 (6.25%)	TraesCS3A03G0609400;TraesCS1B03G1279700;TraesCS1A03G1082100;TraesCS2A03G0302300;TraesCS5A03G0332600;TraesCS3A03G0640300;TraesCS2B03G0104900;TraesCS4B03G0335600;TraesCS1D03G1043500
GO:0033962	P-body assembly	0.000345	0.0004032	10	3 (30%)	TraesCS1B03G0788000;TraesCS1A03G0691100;TraesCS1D03G0654900
GO:0008535	respiratory chain complex IV assembly	0.000345	0.0004032	10	3 (30%)	TraesCS2A03G0229400;TraesCS2D03G0235500;TraesCS7D03G1033100
GO:0033617	mitochondrial cytochrome c oxidase assembly	0.000345	0.0004032	10	3 (30%)	TraesCS2A03G0229400;TraesCS2D03G0235500;TraesCS7D03G1033100
GO:0008215	spermine metabolic process	0.000345	0.0004032	10	3 (30%)	TraesCS6B03G0732400;TraesCS6A03G0601600;TraesCS6D03G0505200
GO:0045491	xylan metabolic process	0.0003485	0.0004071	64	6 (9.38%)	TraesCS7D03G1023900;TraesCS3D03G1089500;TraesCS7A03G1073700;TraesCS7B03G0917200;TraesCS3B03G1276900;TraesCS2A03G0923600
GO:0009269	response to desiccation	0.0003804	0.0004444	24	4 (16.67%)	TraesCS4D03G0528000;TraesCS4A03G0852200;TraesCS1A03G1031600;TraesCS4A03G0180900
GO:0006544	glycine metabolic process	0.0003804	0.0004444	24	4 (16.67%)	TraesCS2A03G1152000;TraesCS2D03G1101000;TraesCS6A03G0397300;TraesCS2B03G1308200
GO:0006996	organelle organization	0.0004131	0.0004824	1745	44 (2.52%)	TraesCS1B03G0263000;TraesCS2A03G0229400;TraesCS6B03G0186600;TraesCS6D03G0396800;TraesCS1B03G0515500;TraesCS2B03G1296100;TraesCS5A03G0199200;TraesCS5B03G1168500;TraesCS6A03G0729500;TraesCS6D03G0011000;TraesCS1D03G0597100;TraesCS5A03G0835900;TraesCS5D03G0369100;TraesCS1B03G0788000;TraesCS4D03G0361400;TraesCS6D03G0611700;TraesCS3D03G0779100;TraesCS4D03G0040400;TraesCS7D03G0624900;TraesCS1A03G0691100…
GO:0006379	mRNA cleavage	0.0004692	0.0005478	11	3 (27.27%)	TraesCS5B03G0240100;TraesCS5D03G0238900;TraesCS5A03G0225300
GO:0006221	pyrimidine nucleotide biosynthetic process	0.0005362	0.0006259	96	7 (7.29%)	TraesCS3A03G0609400;TraesCS1B03G1279700;TraesCS1A03G1082100;TraesCS2A03G0302300;TraesCS2B03G0104900;TraesCS4B03G0335600;TraesCS1D03G1043500
GO:0009116	nucleoside metabolic process	0.0005362	0.0006259	96	7 (7.29%)	TraesCS6B03G0732400;TraesCS6A03G0601600;TraesCS3A03G0640300;TraesCS3B03G0434100;TraesCS6D03G0525200;TraesCS6A03G0617100;TraesCS6D03G0505200
GO:1901700	response to oxygen-containing compound	0.0005448	0.0006358	819	25 (3.05%)	TraesCS1B03G0263000;TraesCS6B03G0186600;TraesCS6D03G0011000;TraesCS1D03G0953700;TraesCS5A03G0835900;TraesCS3B03G0953200;TraesCS3A03G0933300;TraesCS4D03G0528000;TraesCS6D03G0773900;TraesCS7B03G0347800;TraesCS1B03G0841400;TraesCS3B03G0108500;TraesCS4A03G0852200;TraesCS1A03G1031600;TraesCS3B03G0108300;TraesCS7D03G0509700;TraesCS6A03G1045100;TraesCS5B03G0875800;TraesCS7B03G0335800;TraesCS2A03G1241200…
GO:0006220	pyrimidine nucleotide metabolic process	0.0005707	0.0006658	97	7 (7.22%)	TraesCS3A03G0609400;TraesCS1B03G1279700;TraesCS1A03G1082100;TraesCS2A03G0302300;TraesCS2B03G0104900;TraesCS4B03G0335600;TraesCS1D03G1043500
GO:0016053	organic acid biosynthetic process	0.0006021	0.0007023	872	26 (2.98%)	TraesCS4A03G0060100;TraesCS1D03G0544900;TraesCS1A03G0606500;TraesCS2A03G0926800;TraesCS7A03G0949600;TraesCS5A03G0800900;TraesCS4D03G0639000;TraesCS3D03G1185400;TraesCS5B03G0833900;TraesCS3D03G0337600;TraesCS1D03G0581300;TraesCS2D03G1101000;TraesCS7B03G1078600;TraesCS7D03G0914900;TraesCS2B03G1308200;TraesCS2A03G1152000;TraesCS2D03G0644900;TraesCS7A03G0399200;TraesCS5D03G0077800;TraesCS7D03G1144000…
GO:0062197	cellular response to chemical stress	0.0006068	0.0007076	47	5 (10.64%)	TraesCS2A03G1241200;TraesCS3B03G0517500;TraesCS2D03G0830600;TraesCS7D03G0509700;TraesCS7B03G0347800
GO:0006545	glycine biosynthetic process	0.0006188	0.0007214	12	3 (25%)	TraesCS2A03G1152000;TraesCS2D03G1101000;TraesCS2B03G1308200
GO:0019264	glycine biosynthetic process from serine	0.0006188	0.0007214	12	3 (25%)	TraesCS2A03G1152000;TraesCS2D03G1101000;TraesCS2B03G1308200
GO:1901657	glycosyl compound metabolic process	0.000645	0.0007517	99	7 (7.07%)	TraesCS6B03G0732400;TraesCS6A03G0601600;TraesCS3A03G0640300;TraesCS3B03G0434100;TraesCS6D03G0525200;TraesCS6A03G0617100;TraesCS6D03G0505200
GO:0045492	xylan biosynthetic process	0.0006693	0.0007799	48	5 (10.42%)	TraesCS7D03G1023900;TraesCS3D03G1089500;TraesCS7A03G1073700;TraesCS7B03G0917200;TraesCS2A03G0923600
GO:0071554	cell wall organization or biogenesis	0.0007219	0.000841	931	27 (2.9%)	TraesCS7B03G0877500;TraesCS4A03G0608900;TraesCS5B03G1017600;TraesCS4B03G1000000;TraesCS3D03G1089500;TraesCS7A03G1073700;TraesCS7D03G0991300;TraesCS2B03G1153800;TraesCS2A03G0161300;TraesCS7D03G0991100;TraesCS1D03G0143400;TraesCS6B03G0988400;TraesCS7B03G0917200;TraesCS6B03G1260400;TraesCS7B03G0876600;TraesCS7A03G1037700;TraesCS7A03G1035500;TraesCS1B03G0205900;TraesCS7B03G0876800;TraesCS7D03G0992500…
GO:0006656	phosphatidylcholine biosynthetic process	0.0007957	0.0009268	13	3 (23.08%)	TraesCS1D03G0874500;TraesCS3D03G0603700;TraesCS1D03G0874400
GO:0046653	tetrahydrofolate metabolic process	0.0008025	0.0009344	29	4 (13.79%)	TraesCS2A03G1152000;TraesCS5B03G1172800;TraesCS2D03G1101000;TraesCS2B03G1308200
GO:0046395	carboxylic acid catabolic process	0.0008828	0.001028	203	10 (4.93%)	TraesCS2A03G1152000;TraesCS2B03G1015200;TraesCS1A03G0874600;TraesCS2D03G1101000;TraesCS6A03G0376800;TraesCS7B03G0355300;TraesCS7D03G0516600;TraesCS2B03G0102100;TraesCS3B03G0831500;TraesCS6A03G0397300
GO:0009058	biosynthetic process	0.0009159	0.001066	7451	141 (1.89%)	TraesCS5D03G0824300;TraesCS5B03G0983100;TraesCS1D03G0544900;TraesCS5A03G0149600;TraesCS4B03G0493600;TraesCS7A03G0571800;TraesCS5A03G0785100;TraesCS6B03G0041900;TraesCS2D03G0804700;TraesCS3D03G0404300;TraesCS4B03G0335600;TraesCS6B03G0854800;TraesCS4B03G0222400;TraesCS7A03G1037400;TraesCS7D03G0553900;TraesCS3D03G0337600;TraesCS1D03G0581300;TraesCS5D03G0860800;TraesCS1B03G0726800;TraesCS6A03G0262500…
GO:0072528	pyrimidine-containing compound biosynthetic process	0.0009618	0.001119	137	8 (5.84%)	TraesCS3A03G0609400;TraesCS1B03G1279700;TraesCS1A03G1082100;TraesCS2A03G0302300;TraesCS5A03G0332600;TraesCS2B03G0104900;TraesCS4B03G0335600;TraesCS1D03G1043500
GO:0046394	carboxylic acid biosynthetic process	0.001076	0.001252	812	24 (2.96%)	TraesCS5B03G0833900;TraesCS4A03G0060100;TraesCS3D03G0337600;TraesCS1D03G0581300;TraesCS1D03G0544900;TraesCS2D03G1101000;TraesCS7B03G1078600;TraesCS7D03G0914900;TraesCS1A03G0606500;TraesCS2B03G1308200;TraesCS2A03G0926800;TraesCS2A03G1152000;TraesCS2D03G0644900;TraesCS7A03G0399200;TraesCS5D03G0077800;TraesCS7A03G0949600;TraesCS7D03G1144000;TraesCS5A03G0800900;TraesCS2B03G1015200;TraesCS4D03G0639000…
GO:0006839	mitochondrial transport	0.001079	0.001255	108	7 (6.48%)	TraesCS5A03G0199200;TraesCS5B03G0633500;TraesCS4A03G0488900;TraesCS1B03G0604200;TraesCS4B03G0536000;TraesCS4A03G0086300;TraesCS5D03G0582700
GO:0042558	pteridine-containing compound metabolic process	0.00115	0.001338	54	5 (9.26%)	TraesCS2A03G1152000;TraesCS2D03G0725500;TraesCS5B03G1172800;TraesCS2D03G1101000;TraesCS2B03G1308200
GO:0071103	DNA conformation change	0.001168	0.001357	367	14 (3.81%)	TraesCS1B03G0263000;TraesCS6B03G0186600;TraesCS1B03G1049800;TraesCS1B03G0515500;TraesCS1B03G0841400;TraesCS5B03G1168500;TraesCS5A03G0835900;TraesCS5B03G0875800;TraesCS3D03G0411500;TraesCS3D03G0779100;TraesCS1D03G0870500;TraesCS3B03G0520500;TraesCS6B03G0629000;TraesCS6A03G0122300
GO:0046039	GTP metabolic process	0.001239	0.001439	15	3 (20%)	TraesCS1B03G1279700;TraesCS1A03G1082100;TraesCS1D03G1043500
GO:0006183	GTP biosynthetic process	0.001239	0.001439	15	3 (20%)	TraesCS1B03G1279700;TraesCS1A03G1082100;TraesCS1D03G1043500
GO:0046051	UTP metabolic process	0.001239	0.001439	15	3 (20%)	TraesCS1B03G1279700;TraesCS1A03G1082100;TraesCS1D03G1043500
GO:0006228	UTP biosynthetic process	0.001239	0.001439	15	3 (20%)	TraesCS1B03G1279700;TraesCS1A03G1082100;TraesCS1D03G1043500
GO:0051353	positive regulation of oxidoreductase activity	0.001239	0.001439	15	3 (20%)	TraesCS6A03G0877100;TraesCS6B03G1050700;TraesCS6D03G0748600
GO:0005976	polysaccharide metabolic process	0.001263	0.001467	680	21 (3.09%)	TraesCS7B03G0876600;TraesCS7A03G1037700;TraesCS7A03G1035500;TraesCS7B03G0877500;TraesCS1B03G0726800;TraesCS3D03G1089500;TraesCS7A03G1073700;TraesCS7B03G0876800;TraesCS7D03G0991300;TraesCS2B03G1153800;TraesCS3A03G0933300;TraesCS7D03G0992500;TraesCS7D03G0991100;TraesCS7D03G1023900;TraesCS2B03G0480100;TraesCS7D03G0991000;TraesCS7B03G0917200;TraesCS1B03G0659600;TraesCS3B03G1276900;TraesCS2A03G0923600…
GO:0016054	organic acid catabolic process	0.001457	0.001692	217	10 (4.61%)	TraesCS2A03G1152000;TraesCS2B03G1015200;TraesCS1A03G0874600;TraesCS2D03G1101000;TraesCS6A03G0376800;TraesCS7B03G0355300;TraesCS7D03G0516600;TraesCS2B03G0102100;TraesCS3B03G0831500;TraesCS6A03G0397300
GO:0006536	glutamate metabolic process	0.001479	0.001718	34	4 (11.76%)	TraesCS3A03G0046100;TraesCS1A03G0874600;TraesCS3B03G0052400;TraesCS3D03G0041800
GO:0009063	cellular amino acid catabolic process	0.001716	0.001992	150	8 (5.33%)	TraesCS2A03G1152000;TraesCS2B03G1015200;TraesCS1A03G0874600;TraesCS2D03G1101000;TraesCS6A03G0376800;TraesCS2B03G0102100;TraesCS3B03G0831500;TraesCS6A03G0397300
GO:1901576	organic substance biosynthetic process	0.001799	0.002088	7032	132 (1.88%)	TraesCS5D03G0824300;TraesCS1D03G0544900;TraesCS5A03G0149600;TraesCS4B03G0493600;TraesCS7A03G0571800;TraesCS5A03G0785100;TraesCS6B03G0041900;TraesCS2D03G0804700;TraesCS3D03G0404300;TraesCS4B03G0335600;TraesCS6B03G0854800;TraesCS4B03G0222400;TraesCS7A03G1037400;TraesCS7D03G0553900;TraesCS3D03G0337600;TraesCS1D03G0581300;TraesCS5D03G0860800;TraesCS1B03G0726800;TraesCS6A03G0262500;TraesCS2B03G1308200…
GO:0009071	serine family amino acid catabolic process	0.001811	0.002102	17	3 (17.65%)	TraesCS2A03G1152000;TraesCS2D03G1101000;TraesCS6A03G0397300
GO:0031204	posttranslational protein targeting to membrane, translocation	0.001811	0.002102	17	3 (17.65%)	TraesCS4D03G0259900;TraesCS4B03G0317000;TraesCS7D03G1150400
GO:0044282	small molecule catabolic process	0.001821	0.002113	302	12 (3.97%)	TraesCS2A03G1152000;TraesCS2B03G1015200;TraesCS3D03G0816100;TraesCS1A03G0874600;TraesCS2D03G1101000;TraesCS3A03G0640300;TraesCS6A03G0376800;TraesCS7B03G0355300;TraesCS7D03G0516600;TraesCS2B03G0102100;TraesCS3B03G0831500;TraesCS6A03G0397300
GO:0006354	DNA-templated transcription, elongation	0.001836	0.002129	36	4 (11.11%)	TraesCS5B03G0240100;TraesCS1D03G0473600;TraesCS5D03G0238900;TraesCS5A03G0225300
GO:0006368	transcription elongation from RNA polymerase II promoter	0.001836	0.002129	36	4 (11.11%)	TraesCS5B03G0240100;TraesCS1D03G0473600;TraesCS5D03G0238900;TraesCS5A03G0225300
GO:0031497	chromatin assembly	0.001866	0.002164	263	11 (4.18%)	TraesCS1B03G0263000;TraesCS6B03G0186600;TraesCS1B03G1049800;TraesCS1B03G0515500;TraesCS1B03G0841400;TraesCS3D03G0779100;TraesCS1D03G0870500;TraesCS6B03G0629000;TraesCS5A03G0835900;TraesCS5B03G0875800;TraesCS6A03G0122300
GO:1901607	alpha-amino acid biosynthetic process	0.001872	0.00217	303	12 (3.96%)	TraesCS2A03G1152000;TraesCS7A03G0399200;TraesCS5D03G0077800;TraesCS7A03G0949600;TraesCS7D03G1144000;TraesCS4A03G0060100;TraesCS2D03G1101000;TraesCS7B03G1078600;TraesCS7D03G0914900;TraesCS7B03G0199600;TraesCS2A03G1182500;TraesCS2B03G1308200
GO:0009147	pyrimidine nucleoside triphosphate metabolic process	0.00199	0.002307	61	5 (8.2%)	TraesCS3A03G0609400;TraesCS1B03G1279700;TraesCS1A03G1082100;TraesCS4B03G0335600;TraesCS1D03G1043500
GO:0010275	NAD(P)H dehydrogenase complex assembly	0.002068	0.002397	5	2 (40%)	TraesCS1B03G0020700;TraesCS1D03G0010900
GO:0006565	L-serine catabolic process	0.002068	0.002397	5	2 (40%)	TraesCS2A03G1152000;TraesCS2D03G1101000
GO:0006620	posttranslational protein targeting to endoplasmic reticulum membrane	0.00215	0.002491	18	3 (16.67%)	TraesCS4D03G0259900;TraesCS4B03G0317000;TraesCS7D03G1150400
GO:0044262	cellular carbohydrate metabolic process	0.002151	0.002491	711	21 (2.95%)	TraesCS7B03G0876600;TraesCS7A03G1037700;TraesCS7A03G1035500;TraesCS7B03G0877500;TraesCS1B03G0726800;TraesCS3D03G1089500;TraesCS7A03G1073700;TraesCS7B03G0876800;TraesCS7D03G0991300;TraesCS2B03G1153800;TraesCS3A03G0933300;TraesCS7D03G0992500;TraesCS6B03G0634300;TraesCS7D03G0991100;TraesCS7D03G1023900;TraesCS7D03G0991000;TraesCS7B03G0917200;TraesCS1B03G0659600;TraesCS3B03G1276900;TraesCS2A03G0923600…
GO:0009148	pyrimidine nucleoside triphosphate biosynthetic process	0.002248	0.002603	38	4 (10.53%)	TraesCS3A03G0609400;TraesCS1B03G1279700;TraesCS1A03G1082100;TraesCS1D03G1043500
GO:0009208	pyrimidine ribonucleoside triphosphate metabolic process	0.002248	0.002603	38	4 (10.53%)	TraesCS3A03G0609400;TraesCS1B03G1279700;TraesCS1A03G1082100;TraesCS1D03G1043500
GO:0009209	pyrimidine ribonucleoside triphosphate biosynthetic process	0.002248	0.002603	38	4 (10.53%)	TraesCS3A03G0609400;TraesCS1B03G1279700;TraesCS1A03G1082100;TraesCS1D03G1043500
GO:0046036	CTP metabolic process	0.002248	0.002603	38	4 (10.53%)	TraesCS3A03G0609400;TraesCS1B03G1279700;TraesCS1A03G1082100;TraesCS1D03G1043500
GO:0006241	CTP biosynthetic process	0.002248	0.002603	38	4 (10.53%)	TraesCS3A03G0609400;TraesCS1B03G1279700;TraesCS1A03G1082100;TraesCS1D03G1043500
GO:0006730	one-carbon metabolic process	0.002248	0.002603	38	4 (10.53%)	TraesCS2A03G1152000;TraesCS5B03G1172800;TraesCS2D03G1101000;TraesCS2B03G1308200
GO:0006333	chromatin assembly or disassembly	0.002288	0.002648	270	11 (4.07%)	TraesCS1B03G0263000;TraesCS6B03G0186600;TraesCS1B03G1049800;TraesCS1B03G0515500;TraesCS1B03G0841400;TraesCS3D03G0779100;TraesCS1D03G0870500;TraesCS6B03G0629000;TraesCS5A03G0835900;TraesCS5B03G0875800;TraesCS6A03G0122300
GO:0070592	cell wall polysaccharide biosynthetic process	0.002296	0.002657	63	5 (7.94%)	TraesCS7D03G1023900;TraesCS3D03G1089500;TraesCS7A03G1073700;TraesCS7B03G0917200;TraesCS2A03G0923600
GO:0005975	carbohydrate metabolic process	0.002297	0.002657	2685	58 (2.16%)	TraesCS4B03G0116300;TraesCS7B03G0877500;TraesCS4A03G0608900;TraesCS4D03G0022200;TraesCS7B03G0764100;TraesCS6A03G0193300;TraesCS7D03G0990900;TraesCS1D03G0358300;TraesCS2B03G1153800;TraesCS3A03G0933300;TraesCS6B03G0634300;TraesCS7D03G0991000;TraesCS2B03G0812900;TraesCS7B03G0917200;TraesCS2A03G0758200;TraesCS6B03G1260400;TraesCS3D03G0966900;TraesCS4D03G0602800;TraesCS7B03G0876600;TraesCS7A03G1035500…
GO:0080113	regulation of seed growth	0.002526	0.002921	19	3 (15.79%)	TraesCS1A03G0201700;TraesCS1D03G0192500;TraesCS1B03G0270100
GO:0032981	mitochondrial respiratory chain complex I assembly	0.002526	0.002921	19	3 (15.79%)	TraesCS7D03G0624900;TraesCS7B03G0469000;TraesCS1B03G0654200
GO:0000305	response to oxygen radical	0.002526	0.002921	19	3 (15.79%)	TraesCS2A03G1241200;TraesCS7D03G0509700;TraesCS7B03G0347800
GO:0000303	response to superoxide	0.002526	0.002921	19	3 (15.79%)	TraesCS2A03G1241200;TraesCS7D03G0509700;TraesCS7B03G0347800
GO:0034614	cellular response to reactive oxygen species	0.002526	0.002921	19	3 (15.79%)	TraesCS2A03G1241200;TraesCS7D03G0509700;TraesCS7B03G0347800
GO:0071450	cellular response to oxygen radical	0.002526	0.002921	19	3 (15.79%)	TraesCS2A03G1241200;TraesCS7D03G0509700;TraesCS7B03G0347800
GO:0071451	cellular response to superoxide	0.002526	0.002921	19	3 (15.79%)	TraesCS2A03G1241200;TraesCS7D03G0509700;TraesCS7B03G0347800
GO:0019430	removal of superoxide radicals	0.002526	0.002921	19	3 (15.79%)	TraesCS2A03G1241200;TraesCS7D03G0509700;TraesCS7B03G0347800
GO:0051341	regulation of oxidoreductase activity	0.002526	0.002921	19	3 (15.79%)	TraesCS6A03G0877100;TraesCS6B03G1050700;TraesCS6D03G0748600
GO:0008610	lipid biosynthetic process	0.00255	0.002949	1018	27 (2.65%)	TraesCS6B03G0350100;TraesCS6D03G0214700;TraesCS1D03G0874400;TraesCS1A03G0606500;TraesCS2A03G0926800;TraesCS7A03G0571800;TraesCS1B03G0495700;TraesCS5A03G0800900;TraesCS1B03G0495300;TraesCS3D03G0603700;TraesCS4D03G0639000;TraesCS3D03G1185400;TraesCS4B03G0222400;TraesCS5A03G0045500;TraesCS5B03G0833900;TraesCS7D03G0553900;TraesCS7D03G1158600;TraesCS1D03G0581300;TraesCS5D03G0059400;TraesCS5D03G0063200…
GO:0070589	cellular component macromolecule biosynthetic process	0.002635	0.003046	65	5 (7.69%)	TraesCS7D03G1023900;TraesCS3D03G1089500;TraesCS7A03G1073700;TraesCS7B03G0917200;TraesCS2A03G0923600
GO:0044038	cell wall macromolecule biosynthetic process	0.002635	0.003046	65	5 (7.69%)	TraesCS7D03G1023900;TraesCS3D03G1089500;TraesCS7A03G1073700;TraesCS7B03G0917200;TraesCS2A03G0923600
GO:0009628	response to abiotic stimulus	0.002908	0.003361	1079	28 (2.59%)	TraesCS1B03G0263000;TraesCS6B03G0186600;TraesCS2B03G0419300;TraesCS2B03G1296100;TraesCS1D03G0953700;TraesCS5A03G0835900;TraesCS3B03G0831500;TraesCS2B03G0026900;TraesCS4D03G0528000;TraesCS6D03G0773900;TraesCS1B03G0841400;TraesCS3B03G0108500;TraesCS6B03G1151100;TraesCS2D03G1117700;TraesCS4A03G0852200;TraesCS1A03G1031600;TraesCS3B03G0108300;TraesCS7D03G0654000;TraesCS5B03G0875800;TraesCS7D03G1144200…
GO:0008216	spermidine metabolic process	0.002939	0.003397	20	3 (15%)	TraesCS6B03G0732400;TraesCS6A03G0601600;TraesCS6D03G0505200
GO:0008295	spermidine biosynthetic process	0.002939	0.003397	20	3 (15%)	TraesCS6B03G0732400;TraesCS6A03G0601600;TraesCS6D03G0505200
GO:0070973	protein localization to endoplasmic reticulum exit site	0.003073	0.00355	6	2 (33.33%)	TraesCS6A03G0781200;TraesCS6D03G0661300
GO:0015942	formate metabolic process	0.003073	0.00355	6	2 (33.33%)	TraesCS7B03G0355300;TraesCS7D03G0516600
GO:0042183	formate catabolic process	0.003073	0.00355	6	2 (33.33%)	TraesCS7B03G0355300;TraesCS7D03G0516600
GO:0044249	cellular biosynthetic process	0.003178	0.003671	6840	127 (1.86%)	TraesCS5D03G0824300;TraesCS1D03G0544900;TraesCS5A03G0149600;TraesCS4B03G0493600;TraesCS7A03G0571800;TraesCS5A03G0785100;TraesCS6B03G0041900;TraesCS2D03G0804700;TraesCS3D03G0404300;TraesCS4B03G0335600;TraesCS6B03G0854800;TraesCS7D03G0553900;TraesCS3D03G0337600;TraesCS1D03G0581300;TraesCS5D03G0860800;TraesCS1B03G0726800;TraesCS6A03G0262500;TraesCS2B03G1308200;TraesCS5D03G0077800;TraesCS7D03G0286800…
GO:0010257	NADH dehydrogenase complex assembly	0.003392	0.003917	21	3 (14.29%)	TraesCS7D03G0624900;TraesCS7B03G0469000;TraesCS1B03G0654200
GO:0006323	DNA packaging	0.003544	0.004092	286	11 (3.85%)	TraesCS1B03G0263000;TraesCS6B03G0186600;TraesCS1B03G1049800;TraesCS1B03G0515500;TraesCS1B03G0841400;TraesCS3D03G0779100;TraesCS1D03G0870500;TraesCS6B03G0629000;TraesCS5A03G0835900;TraesCS5B03G0875800;TraesCS6A03G0122300
GO:0042026	protein refolding	0.003549	0.004096	43	4 (9.3%)	TraesCS2D03G0714700;TraesCS1B03G0473000;TraesCS1D03G0364300;TraesCS1A03G0391400
GO:0043603	cellular amide metabolic process	0.003832	0.004422	2353	51 (2.17%)	TraesCS5D03G0824300;TraesCS7D03G1182200;TraesCS1B03G0139900;TraesCS1A03G0501900;TraesCS5A03G1203100;TraesCS3A03G0534000;TraesCS2D03G0644100;TraesCS3B03G0409600;TraesCS4B03G0857300;TraesCS3D03G0978800;TraesCS1B03G0819100;TraesCS2A03G0129000;TraesCS7B03G0414300;TraesCS7B03G0544400;TraesCS3D03G0337600;TraesCS2D03G1101000;TraesCS5D03G0860800;TraesCS1B03G0868100;TraesCS4A03G1151000;TraesCS1D03G0486300…
GO:0006760	folic acid-containing compound metabolic process	0.003859	0.004452	44	4 (9.09%)	TraesCS2A03G1152000;TraesCS5B03G1172800;TraesCS2D03G1101000;TraesCS2B03G1308200
GO:0006334	nucleosome assembly	0.004267	0.004921	252	10 (3.97%)	TraesCS1B03G0263000;TraesCS6B03G0186600;TraesCS1B03G1049800;TraesCS1B03G0841400;TraesCS3D03G0779100;TraesCS1D03G0870500;TraesCS6B03G0629000;TraesCS5A03G0835900;TraesCS5B03G0875800;TraesCS6A03G0122300
GO:0055086	nucleobase-containing small molecule metabolic process	0.004424	0.005101	857	23 (2.68%)	TraesCS6B03G0732400;TraesCS7D03G0553900;TraesCS6A03G0601600;TraesCS3A03G0640300;TraesCS5B03G0703200;TraesCS2B03G0104900;TraesCS5D03G0860800;TraesCS1D03G1043500;TraesCS5D03G0303800;TraesCS6A03G0617100;TraesCS3A03G0609400;TraesCS7A03G0571800;TraesCS1B03G1279700;TraesCS1A03G1082100;TraesCS2A03G0302300;TraesCS3D03G0816100;TraesCS5A03G0332600;TraesCS1D03G0815700;TraesCS3B03G0434100;TraesCS4B03G0335600…
GO:0008652	cellular amino acid biosynthetic process	0.004508	0.005196	338	12 (3.55%)	TraesCS2A03G1152000;TraesCS7A03G0399200;TraesCS5D03G0077800;TraesCS7A03G0949600;TraesCS7D03G1144000;TraesCS4A03G0060100;TraesCS2D03G1101000;TraesCS7B03G1078600;TraesCS7D03G0914900;TraesCS7B03G0199600;TraesCS2A03G1182500;TraesCS2B03G1308200
GO:0009309	amine biosynthetic process	0.004526	0.005216	105	6 (5.71%)	TraesCS6B03G0732400;TraesCS7A03G0949600;TraesCS6A03G0601600;TraesCS7D03G0914900;TraesCS2B03G0102100;TraesCS6D03G0505200
GO:0042401	cellular biogenic amine biosynthetic process	0.004526	0.005216	105	6 (5.71%)	TraesCS6B03G0732400;TraesCS7A03G0949600;TraesCS6A03G0601600;TraesCS7D03G0914900;TraesCS2B03G0102100;TraesCS6D03G0505200
GO:0007205	protein kinase C-activating G protein-coupled receptor signaling pathway	0.004997	0.005758	24	3 (12.5%)	TraesCS3A03G0775100;TraesCS3D03G0716500;TraesCS3B03G0892500
GO:0015936	coenzyme A metabolic process	0.004997	0.005758	24	3 (12.5%)	TraesCS7A03G0571800;TraesCS7D03G0553900;TraesCS5B03G0703200
GO:0009218	pyrimidine ribonucleotide metabolic process	0.005284	0.006086	48	4 (8.33%)	TraesCS3A03G0609400;TraesCS1B03G1279700;TraesCS1A03G1082100;TraesCS1D03G1043500
GO:0009220	pyrimidine ribonucleotide biosynthetic process	0.005284	0.006086	48	4 (8.33%)	TraesCS3A03G0609400;TraesCS1B03G1279700;TraesCS1A03G1082100;TraesCS1D03G1043500
GO:1901566	organonitrogen compound biosynthetic process	0.005331	0.006139	3496	70 (2%)	TraesCS1D03G0725400;TraesCS5D03G0824300;TraesCS6B03G0732400;TraesCS7D03G1182200;TraesCS5A03G1203100;TraesCS3A03G0534000;TraesCS6A03G0601600;TraesCS1D03G0544900;TraesCS2D03G0644100;TraesCS2B03G0104900;TraesCS4B03G0493600;TraesCS3B03G0409600;TraesCS1B03G0819100;TraesCS3D03G0603700;TraesCS2D03G0804700;TraesCS7B03G0414300;TraesCS3D03G0404300;TraesCS7B03G0544400;TraesCS4B03G0335600;TraesCS6D03G0525200…
GO:0034728	nucleosome organization	0.005435	0.006258	261	10 (3.83%)	TraesCS1B03G0263000;TraesCS6B03G0186600;TraesCS1B03G1049800;TraesCS1B03G0841400;TraesCS3D03G0779100;TraesCS1D03G0870500;TraesCS6B03G0629000;TraesCS5A03G0835900;TraesCS5B03G0875800;TraesCS6A03G0122300
GO:0006123	mitochondrial electron transport, cytochrome c to oxygen	0.005625	0.006475	8	2 (25%)	TraesCS1D03G0634900;TraesCS1A03G0671500
GO:0006616	SRP-dependent cotranslational protein targeting to membrane, translocation	0.005625	0.006475	8	2 (25%)	TraesCS4D03G0259900;TraesCS4B03G0317000
GO:1901606	alpha-amino acid catabolic process	0.006068	0.006984	147	7 (4.76%)	TraesCS2A03G1152000;TraesCS2B03G1015200;TraesCS1A03G0874600;TraesCS2D03G1101000;TraesCS2B03G0102100;TraesCS3B03G0831500;TraesCS6A03G0397300
GO:0006518	peptide metabolic process	0.006073	0.006987	2184	47 (2.15%)	TraesCS2B03G1439500;TraesCS3D03G0686300;TraesCS5D03G0824300;TraesCS7D03G0571300;TraesCS6D03G0396800;TraesCS7D03G1182200;TraesCS1B03G0139900;TraesCS3B03G0971800;TraesCS1A03G0501900;TraesCS5A03G1203100;TraesCS3A03G0534000;TraesCS2D03G0644100;TraesCS4A03G0045900;TraesCS4B03G0454300;TraesCS1D03G0221300;TraesCS3B03G0409600;TraesCS1A03G0400700;TraesCS5B03G0904700;TraesCS4B03G0857300;TraesCS4D03G0361400…
GO:0006073	cellular glucan metabolic process	0.006254	0.007194	443	14 (3.16%)	TraesCS7B03G0876600;TraesCS7A03G1037700;TraesCS7A03G1035500;TraesCS7B03G0877500;TraesCS1B03G0726800;TraesCS7B03G0876800;TraesCS7D03G0991300;TraesCS2B03G1153800;TraesCS3A03G0933300;TraesCS7D03G0992500;TraesCS7D03G0991100;TraesCS7D03G0991000;TraesCS1B03G0659600;TraesCS6B03G1260400
GO:0044042	glucan metabolic process	0.006495	0.007469	445	14 (3.15%)	TraesCS7B03G0876600;TraesCS7A03G1037700;TraesCS7A03G1035500;TraesCS7B03G0877500;TraesCS1B03G0726800;TraesCS7B03G0876800;TraesCS7D03G0991300;TraesCS2B03G1153800;TraesCS3A03G0933300;TraesCS7D03G0992500;TraesCS7D03G0991100;TraesCS7D03G0991000;TraesCS1B03G0659600;TraesCS6B03G1260400
GO:0017004	cytochrome complex assembly	0.006758	0.007769	81	5 (6.17%)	TraesCS2A03G0229400;TraesCS3D03G1159800;TraesCS1B03G0636600;TraesCS2D03G0235500;TraesCS7D03G1033100
GO:0051276	chromosome organization	0.007057	0.008112	592	17 (2.87%)	TraesCS1B03G0263000;TraesCS6B03G0186600;TraesCS1B03G1049800;TraesCS1B03G0515500;TraesCS1B03G0841400;TraesCS5B03G1168500;TraesCS5A03G0835900;TraesCS5B03G0875800;TraesCS2D03G0664300;TraesCS3D03G0411500;TraesCS3D03G0779100;TraesCS4D03G0040400;TraesCS1D03G0870500;TraesCS2B03G0796300;TraesCS3B03G0520500;TraesCS6B03G0629000;TraesCS6A03G0122300
GO:0043174	nucleoside salvage	0.007163	0.008231	9	2 (22.22%)	TraesCS6D03G0525200;TraesCS6A03G0617100
GO:0006166	purine ribonucleoside salvage	0.007163	0.008231	9	2 (22.22%)	TraesCS6D03G0525200;TraesCS6A03G0617100
GO:0006596	polyamine biosynthetic process	0.00751	0.008628	53	4 (7.55%)	TraesCS6B03G0732400;TraesCS6A03G0601600;TraesCS2B03G0102100;TraesCS6D03G0505200
GO:0051259	protein complex oligomerization	0.00751	0.008628	53	4 (7.55%)	TraesCS2B03G0966000;TraesCS2D03G0427900;TraesCS3B03G0108500;TraesCS3B03G0108300
GO:0006801	superoxide metabolic process	0.007747	0.008898	28	3 (10.71%)	TraesCS2A03G1241200;TraesCS7D03G0509700;TraesCS7B03G0347800
GO:0006595	polyamine metabolic process	0.008549	0.009817	55	4 (7.27%)	TraesCS6B03G0732400;TraesCS6A03G0601600;TraesCS2B03G0102100;TraesCS6D03G0505200
GO:0000302	response to reactive oxygen species	0.008658	0.00994	86	5 (5.81%)	TraesCS3B03G0108500;TraesCS2A03G1241200;TraesCS3B03G0108300;TraesCS7D03G0509700;TraesCS7B03G0347800
GO:0006312	mitotic recombination	0.008867	0.01	10	2 (20%)	TraesCS2D03G0664300;TraesCS2B03G0796300
GO:0065004	protein-DNA complex assembly	0.009548	0.01	328	11 (3.35%)	TraesCS1B03G0263000;TraesCS6B03G0186600;TraesCS1B03G1049800;TraesCS5A03G0785100;TraesCS1B03G0841400;TraesCS3D03G0779100;TraesCS1D03G0870500;TraesCS6B03G0629000;TraesCS5A03G0835900;TraesCS5B03G0875800;TraesCS6A03G0122300
GO:0042221	response to chemical	0.009639	0.01	1733	38 (2.19%)	TraesCS1B03G0263000;TraesCS6B03G0186600;TraesCS1B03G0139900;TraesCS7D03G1033600;TraesCS5A03G0149600;TraesCS6D03G0011000;TraesCS2A03G0934600;TraesCS2D03G0830600;TraesCS1D03G0953700;TraesCS5A03G0835900;TraesCS3B03G0953200;TraesCS3A03G0933300;TraesCS4D03G0528000;TraesCS6D03G0773900;TraesCS7B03G0347800;TraesCS1B03G0841400;TraesCS3B03G0108500;TraesCS6B03G1151100;TraesCS4A03G0852200;TraesCS4B03G0759800…
GO:0048638	regulation of developmental growth	0.01	0.01	93	5 (5.38%)	TraesCS1D03G0504900;TraesCS1A03G0201700;TraesCS1D03G0192500;TraesCS1B03G0270100;TraesCS2D03G0384600
GO:0006950	response to stress	0.01	0.01	3133	62 (1.98%)	TraesCS2B03G0419300;TraesCS7B03G0359800;TraesCS6D03G0011000;TraesCS1B03G0036700;TraesCS2B03G0839500;TraesCS3A03G0933300;TraesCS3A03G0444200;TraesCS3A03G0446500;TraesCS2B03G0812900;TraesCS2D03G0269600;TraesCS1A03G0261500;TraesCS1B03G0841400;TraesCS3B03G0108500;TraesCS6B03G1151100;TraesCS7D03G0891400;TraesCS4A03G0852200;TraesCS1A03G1031600;TraesCS3B03G0108300;TraesCS4A03G0569900;TraesCS3B03G0517500…
GO:0019725	cellular homeostasis	0.01	0.01	474	14 (2.95%)	TraesCS2D03G0141700;TraesCS7D03G0062200;TraesCS4A03G0045900;TraesCS4A03G0569900;TraesCS3B03G0517500;TraesCS2D03G0830600;TraesCS2A03G0888500;TraesCS3D03G0408000;TraesCS5A03G0595200;TraesCS4A03G1151800;TraesCS2A03G0129000;TraesCS2A03G0810500;TraesCS7D03G1033100;TraesCS1A03G1040400
GO:0006338	chromatin remodeling	0.01	0.01	298	10 (3.36%)	TraesCS1B03G0263000;TraesCS6B03G0186600;TraesCS1B03G1049800;TraesCS1B03G0841400;TraesCS3D03G0779100;TraesCS1D03G0870500;TraesCS6B03G0629000;TraesCS5A03G0835900;TraesCS5B03G0875800;TraesCS6A03G0122300
GO:0071824	protein-DNA complex subunit organization	0.01	0.01	338	11 (3.25%)	TraesCS1B03G0263000;TraesCS6B03G0186600;TraesCS1B03G1049800;TraesCS5A03G0785100;TraesCS1B03G0841400;TraesCS3D03G0779100;TraesCS1D03G0870500;TraesCS6B03G0629000;TraesCS5A03G0835900;TraesCS5B03G0875800;TraesCS6A03G0122300
GO:0009072	aromatic amino acid family metabolic process	0.01	0.02	214	8 (3.74%)	TraesCS7A03G0949600;TraesCS2B03G1015200;TraesCS7B03G0671400;TraesCS1D03G0544900;TraesCS7D03G0914900;TraesCS6A03G0351700;TraesCS6B03G0433700;TraesCS6D03G0290400
GO:0090610	bundle sheath cell fate specification	0.01	0.02	1	1 (100%)	TraesCS2A03G0418400
GO:0046916	cellular transition metal ion homeostasis	0.01	0.02	64	4 (6.25%)	TraesCS4A03G1151800;TraesCS2A03G0810500;TraesCS7D03G0062200;TraesCS7D03G1033100
GO:0009308	amine metabolic process	0.01	0.01	245	9 (3.67%)	TraesCS3A03G0646100;TraesCS6B03G0732400;TraesCS7A03G0949600;TraesCS6A03G0601600;TraesCS7B03G0671400;TraesCS7D03G0914900;TraesCS2B03G0102100;TraesCS3D03G0590600;TraesCS6D03G0505200
GO:0044106	cellular amine metabolic process	0.01	0.01	162	7 (4.32%)	TraesCS6B03G0732400;TraesCS7A03G0949600;TraesCS6A03G0601600;TraesCS7B03G0671400;TraesCS7D03G0914900;TraesCS2B03G0102100;TraesCS6D03G0505200
GO:0006576	cellular biogenic amine metabolic process	0.01	0.01	162	7 (4.32%)	TraesCS6B03G0732400;TraesCS7A03G0949600;TraesCS6A03G0601600;TraesCS7B03G0671400;TraesCS7D03G0914900;TraesCS2B03G0102100;TraesCS6D03G0505200
GO:2000779	regulation of double-strand break repair	0.01	0.02	1	1 (100%)	TraesCS4D03G0040400
GO:0010569	regulation of double-strand break repair via homologous recombination	0.01	0.02	1	1 (100%)	TraesCS4D03G0040400
GO:2001021	negative regulation of response to DNA damage stimulus	0.01	0.02	1	1 (100%)	TraesCS4D03G0040400
GO:0045738	negative regulation of DNA repair	0.01	0.02	1	1 (100%)	TraesCS4D03G0040400
GO:2000780	negative regulation of double-strand break repair	0.01	0.02	1	1 (100%)	TraesCS4D03G0040400
GO:2000042	negative regulation of double-strand break repair via homologous recombination	0.01	0.02	1	1 (100%)	TraesCS4D03G0040400
GO:0010731	protein glutathionylation	0.01	0.02	1	1 (100%)	TraesCS4D03G0492800
GO:0071704	organic substance metabolic process	0.02	0.03	22718	362 (1.59%)	TraesCS5D03G0824300;TraesCS4A03G0608900;TraesCS1D03G0544900;TraesCS5A03G0149600;TraesCS1B03G0687100;TraesCS4B03G0493600;TraesCS7A03G0571800;TraesCS4B03G0857300;TraesCS2B03G1153800;TraesCS1D03G0760600;TraesCS5B03G1001000;TraesCS7D03G0991000;TraesCS3D03G0404300;TraesCS3A03G0224100;TraesCS4D03G0694600;TraesCS4B03G0222400;TraesCS3A03G0046100;TraesCS7A03G1035500;TraesCS4A03G0443200;TraesCS3D03G0337600…
GO:0042775	mitochondrial ATP synthesis coupled electron transport	0.02	0.02	40	3 (7.5%)	TraesCS1D03G0634900;TraesCS4A03G0230700;TraesCS1A03G0671500
GO:0006122	mitochondrial electron transport, ubiquinol to cytochrome c	0.02	0.03	16	2 (12.5%)	TraesCS1D03G0634900;TraesCS1A03G0671500
GO:0051493	regulation of cytoskeleton organization	0.02	0.03	75	4 (5.33%)	TraesCS2D03G0427900;TraesCS5A03G0035400;TraesCS1A03G0826700;TraesCS2B03G0320600
GO:0045454	cell redox homeostasis	0.02	0.02	317	10 (3.15%)	TraesCS2A03G0888500;TraesCS3D03G0408000;TraesCS5A03G0595200;TraesCS2A03G0129000;TraesCS4A03G0045900;TraesCS7D03G1033100;TraesCS4A03G0569900;TraesCS3B03G0517500;TraesCS1A03G1040400;TraesCS2D03G0830600
GO:0098869	cellular oxidant detoxification	0.02	0.02	147	6 (4.08%)	TraesCS1B03G0139900;TraesCS2A03G1241200;TraesCS3B03G0517500;TraesCS2D03G0830600;TraesCS7D03G0509700;TraesCS7B03G0347800
GO:0045229	external encapsulating structure organization	0.02	0.02	708	18 (2.54%)	TraesCS7B03G0876600;TraesCS7A03G1037700;TraesCS7A03G1035500;TraesCS4A03G0608900;TraesCS5B03G1017600;TraesCS6A03G0713400;TraesCS4B03G1000000;TraesCS1B03G0205900;TraesCS7D03G0991300;TraesCS2B03G1153800;TraesCS7D03G0992500;TraesCS2A03G0161300;TraesCS7D03G0991100;TraesCS2B03G0480100;TraesCS2B03G0224700;TraesCS1D03G0143400;TraesCS6B03G1260400;TraesCS2B03G1353400
GO:0071555	cell wall organization	0.02	0.03	676	17 (2.51%)	TraesCS7B03G0876600;TraesCS7A03G1037700;TraesCS7A03G1035500;TraesCS4A03G0608900;TraesCS5B03G1017600;TraesCS4B03G1000000;TraesCS1B03G0205900;TraesCS7D03G0991300;TraesCS2B03G1153800;TraesCS7D03G0992500;TraesCS2A03G0161300;TraesCS7D03G0991100;TraesCS2B03G0480100;TraesCS2B03G0224700;TraesCS1D03G0143400;TraesCS6B03G1260400;TraesCS2B03G1353400
GO:0006325	chromatin organization	0.02	0.02	354	11 (3.11%)	TraesCS1B03G0263000;TraesCS6B03G0186600;TraesCS1B03G1049800;TraesCS1B03G0515500;TraesCS1B03G0841400;TraesCS3D03G0779100;TraesCS1D03G0870500;TraesCS6B03G0629000;TraesCS5A03G0835900;TraesCS5B03G0875800;TraesCS6A03G0122300
GO:0003002	regionalization	0.02	0.03	42	3 (7.14%)	TraesCS2B03G0545900;TraesCS1D03G0637600;TraesCS5B03G0217600
GO:0006875	cellular metal ion homeostasis	0.02	0.02	105	5 (4.76%)	TraesCS2D03G0141700;TraesCS4A03G1151800;TraesCS2A03G0810500;TraesCS7D03G0062200;TraesCS7D03G1033100
GO:0055071	manganese ion homeostasis	0.02	0.03	43	3 (6.98%)	TraesCS4A03G1151800;TraesCS2A03G0810500;TraesCS7D03G0062200
GO:0030026	cellular manganese ion homeostasis	0.02	0.03	43	3 (6.98%)	TraesCS4A03G1151800;TraesCS2A03G0810500;TraesCS7D03G0062200
GO:0046655	folic acid metabolic process	0.02	0.03	16	2 (12.5%)	TraesCS2A03G1152000;TraesCS2D03G1101000
GO:0009699	phenylpropanoid biosynthetic process	0.02	0.02	66	4 (6.06%)	TraesCS2B03G1015200;TraesCS6A03G0429300;TraesCS3B03G0673300;TraesCS6D03G0011000
GO:0007006	mitochondrial membrane organization	0.02	0.02	41	3 (7.32%)	TraesCS5A03G0199200;TraesCS4B03G0536000;TraesCS4A03G0086300
GO:0007007	inner mitochondrial membrane organization	0.02	0.02	37	3 (8.11%)	TraesCS5A03G0199200;TraesCS4B03G0536000;TraesCS4A03G0086300
GO:0072657	protein localization to membrane	0.02	0.02	141	6 (4.26%)	TraesCS4D03G0259900;TraesCS5A03G0199200;TraesCS4B03G0317000;TraesCS7D03G1150400;TraesCS4B03G0536000;TraesCS4A03G0086300
GO:0090150	establishment of protein localization to membrane	0.02	0.02	138	6 (4.35%)	TraesCS4D03G0259900;TraesCS5A03G0199200;TraesCS4B03G0317000;TraesCS7D03G1150400;TraesCS4B03G0536000;TraesCS4A03G0086300
GO:0090151	establishment of protein localization to mitochondrial membrane	0.02	0.02	40	3 (7.5%)	TraesCS5A03G0199200;TraesCS4B03G0536000;TraesCS4A03G0086300
GO:0051204	protein insertion into mitochondrial membrane	0.02	0.02	40	3 (7.5%)	TraesCS5A03G0199200;TraesCS4B03G0536000;TraesCS4A03G0086300
GO:0045039	protein insertion into mitochondrial inner membrane	0.02	0.02	36	3 (8.33%)	TraesCS5A03G0199200;TraesCS4B03G0536000;TraesCS4A03G0086300
GO:0010154	fruit development	0.02	0.03	237	8 (3.38%)	TraesCS7D03G0506000;TraesCS6B03G0719500;TraesCS5A03G0463400;TraesCS6A03G0592200;TraesCS7D03G1033100;TraesCS4A03G0569900;TraesCS7B03G0905900;TraesCS5B03G0457900
GO:0048316	seed development	0.02	0.02	228	8 (3.51%)	TraesCS7D03G0506000;TraesCS6B03G0719500;TraesCS5A03G0463400;TraesCS6A03G0592200;TraesCS7D03G1033100;TraesCS4A03G0569900;TraesCS7B03G0905900;TraesCS5B03G0457900
GO:0008299	isoprenoid biosynthetic process	0.02	0.02	229	8 (3.49%)	TraesCS7A03G0571800;TraesCS6B03G0350100;TraesCS7D03G0553900;TraesCS6D03G0214700;TraesCS5D03G0063200;TraesCS5B03G0703200;TraesCS4A03G0796400;TraesCS6A03G0262500
GO:0006848	pyruvate transport	0.02	0.03	16	2 (12.5%)	TraesCS4A03G1214100;TraesCS7A03G0033500
GO:1901475	pyruvate transmembrane transport	0.02	0.03	16	2 (12.5%)	TraesCS4A03G1214100;TraesCS7A03G0033500
GO:0006850	mitochondrial pyruvate transmembrane transport	0.02	0.03	16	2 (12.5%)	TraesCS4A03G1214100;TraesCS7A03G0033500
GO:0070972	protein localization to endoplasmic reticulum	0.02	0.02	100	5 (5%)	TraesCS4D03G0259900;TraesCS4B03G0317000;TraesCS7D03G1150400;TraesCS6A03G0781200;TraesCS6D03G0661300
GO:0009790	embryo development	0.02	0.02	187	7 (3.74%)	TraesCS7D03G0506000;TraesCS6B03G0719500;TraesCS5A03G0463400;TraesCS6A03G0592200;TraesCS7D03G1033100;TraesCS7B03G0905900;TraesCS5B03G0457900
GO:0009793	embryo development ending in seed dormancy	0.02	0.02	184	7 (3.8%)	TraesCS7D03G0506000;TraesCS6B03G0719500;TraesCS5A03G0463400;TraesCS6A03G0592200;TraesCS7D03G1033100;TraesCS7B03G0905900;TraesCS5B03G0457900
GO:0006722	triterpenoid metabolic process	0.02	0.02	36	3 (8.33%)	TraesCS6B03G0350100;TraesCS6D03G0214700;TraesCS6A03G0262500
GO:0016104	triterpenoid biosynthetic process	0.02	0.02	36	3 (8.33%)	TraesCS6B03G0350100;TraesCS6D03G0214700;TraesCS6A03G0262500
GO:0072330	monocarboxylic acid biosynthetic process	0.03	0.03	382	11 (2.88%)	TraesCS2A03G0926800;TraesCS2D03G0644900;TraesCS5B03G0833900;TraesCS5A03G0800900;TraesCS2B03G1015200;TraesCS3D03G0337600;TraesCS1D03G0581300;TraesCS4D03G0639000;TraesCS5D03G0758500;TraesCS1A03G0606500;TraesCS3D03G1185400
GO:0019646	aerobic electron transport chain	0.03	0.03	45	3 (6.67%)	TraesCS1D03G0634900;TraesCS4A03G0230700;TraesCS1A03G0671500
GO:0019751	polyol metabolic process	0.03	0.04	83	4 (4.82%)	TraesCS7A03G1037400;TraesCS1A03G0821600;TraesCS1D03G0790700;TraesCS6B03G0634300
GO:0043647	inositol phosphate metabolic process	0.03	0.04	47	3 (6.38%)	TraesCS7A03G1037400;TraesCS1A03G0821600;TraesCS1D03G0790700
GO:0032957	inositol trisphosphate metabolic process	0.03	0.03	18	2 (11.11%)	TraesCS1A03G0821600;TraesCS1D03G0790700
GO:0009064	glutamine family amino acid metabolic process	0.03	0.04	164	6 (3.66%)	TraesCS3A03G0609400;TraesCS3A03G0046100;TraesCS1A03G0874600;TraesCS3B03G0052400;TraesCS2B03G0102100;TraesCS3D03G0041800
GO:0098754	detoxification	0.03	0.03	157	6 (3.82%)	TraesCS1B03G0139900;TraesCS2A03G1241200;TraesCS3B03G0517500;TraesCS2D03G0830600;TraesCS7D03G0509700;TraesCS7B03G0347800
GO:0097237	cellular response to toxic substance	0.03	0.03	157	6 (3.82%)	TraesCS1B03G0139900;TraesCS2A03G1241200;TraesCS3B03G0517500;TraesCS2D03G0830600;TraesCS7D03G0509700;TraesCS7B03G0347800
GO:1990748	cellular detoxification	0.03	0.03	157	6 (3.82%)	TraesCS1B03G0139900;TraesCS2A03G1241200;TraesCS3B03G0517500;TraesCS2D03G0830600;TraesCS7D03G0509700;TraesCS7B03G0347800
GO:0018063	cytochrome c-heme linkage	0.03	0.03	2	1 (50%)	TraesCS1B03G0636600
GO:0009073	aromatic amino acid family biosynthetic process	0.03	0.04	84	4 (4.76%)	TraesCS7A03G0949600;TraesCS1D03G0544900;TraesCS7D03G0914900;TraesCS6A03G0351700
GO:0048731	system development	0.03	0.04	658	16 (2.43%)	TraesCS2D03G0710200;TraesCS2A03G0418400;TraesCS6A03G0592200;TraesCS1D03G0637600;TraesCS4A03G0569900;TraesCS1D03G0597100;TraesCS7D03G0654000;TraesCS7D03G0506000;TraesCS6B03G0719500;TraesCS2B03G0545900;TraesCS5A03G0463400;TraesCS4A03G0796400;TraesCS5B03G0217600;TraesCS7D03G1033100;TraesCS7B03G0905900;TraesCS5B03G0457900
GO:0042543	protein N-linked glycosylation via arginine	0.03	0.03	2	1 (50%)	TraesCS1D03G0725400
GO:0030003	cellular cation homeostasis	0.03	0.04	121	5 (4.13%)	TraesCS2D03G0141700;TraesCS4A03G1151800;TraesCS2A03G0810500;TraesCS7D03G0062200;TraesCS7D03G1033100
GO:0033389	putrescine biosynthetic process from arginine, using agmatinase	0.03	0.03	2	1 (50%)	TraesCS2B03G0102100
GO:1902903	regulation of supramolecular fiber organization	0.03	0.03	46	3 (6.52%)	TraesCS2D03G0427900;TraesCS5A03G0035400;TraesCS2B03G0320600
GO:0052575	carbohydrate localization	0.03	0.03	2	1 (50%)	TraesCS2B03G0812900
GO:0052576	carbohydrate storage	0.03	0.03	2	1 (50%)	TraesCS2B03G0812900
GO:0032468	Golgi calcium ion homeostasis	0.03	0.03	2	1 (50%)	TraesCS2D03G0141700
GO:0032472	Golgi calcium ion transport	0.03	0.03	2	1 (50%)	TraesCS2D03G0141700
GO:0009866	induced systemic resistance, ethylene mediated signaling pathway	0.03	0.03	2	1 (50%)	TraesCS3A03G0933300
GO:0006265	DNA topological change	0.03	0.03	45	3 (6.67%)	TraesCS3D03G0411500;TraesCS5B03G1168500;TraesCS3B03G0520500
GO:0009809	lignin biosynthetic process	0.03	0.03	18	2 (11.11%)	TraesCS6A03G0429300;TraesCS3B03G0673300
GO:0051668	localization within membrane	0.03	0.03	154	6 (3.9%)	TraesCS4D03G0259900;TraesCS5A03G0199200;TraesCS4B03G0317000;TraesCS7D03G1150400;TraesCS4B03G0536000;TraesCS4A03G0086300
GO:0051205	protein insertion into membrane	0.03	0.04	49	3 (6.12%)	TraesCS5A03G0199200;TraesCS4B03G0536000;TraesCS4A03G0086300
GO:0043007	maintenance of rDNA	0.03	0.03	2	1 (50%)	TraesCS4D03G0040400
GO:0031110	regulation of microtubule polymerization or depolymerization	0.03	0.03	2	1 (50%)	TraesCS5A03G0035400
GO:0031112	positive regulation of microtubule polymerization or depolymerization	0.03	0.03	2	1 (50%)	TraesCS5A03G0035400
GO:0031113	regulation of microtubule polymerization	0.03	0.03	2	1 (50%)	TraesCS5A03G0035400
GO:0032273	positive regulation of protein polymerization	0.03	0.03	2	1 (50%)	TraesCS5A03G0035400
GO:0031116	positive regulation of microtubule polymerization	0.03	0.03	2	1 (50%)	TraesCS5A03G0035400
GO:0097428	protein maturation by iron-sulfur cluster transfer	0.03	0.04	19	2 (10.53%)	TraesCS5A03G0968800;TraesCS5A03G0482400
GO:0046219	indolalkylamine biosynthetic process	0.03	0.04	20	2 (10%)	TraesCS7A03G0949600;TraesCS7D03G0914900
GO:0000162	tryptophan biosynthetic process	0.03	0.04	20	2 (10%)	TraesCS7A03G0949600;TraesCS7D03G0914900
GO:0065008	regulation of biological quality	0.04	0.04	877	20 (2.28%)	TraesCS2D03G0141700;TraesCS3A03G0646100;TraesCS7D03G0062200;TraesCS4A03G0045900;TraesCS4A03G0569900;TraesCS3B03G0517500;TraesCS2D03G0830600;TraesCS7D03G0654000;TraesCS2B03G0320600;TraesCS2A03G0888500;TraesCS2D03G0427900;TraesCS3D03G0408000;TraesCS5A03G0595200;TraesCS4A03G1151800;TraesCS2A03G0129000;TraesCS2A03G0810500;TraesCS1A03G0826700;TraesCS7D03G1033100;TraesCS1A03G1040400;TraesCS3D03G0590600
GO:0010133	proline catabolic process to glutamate	0.04	0.05	3	1 (33.33%)	TraesCS1A03G0874600
GO:0042592	homeostatic process	0.04	0.05	572	14 (2.45%)	TraesCS2D03G0141700;TraesCS7D03G0062200;TraesCS4A03G0045900;TraesCS4A03G0569900;TraesCS3B03G0517500;TraesCS2D03G0830600;TraesCS2A03G0888500;TraesCS3D03G0408000;TraesCS5A03G0595200;TraesCS4A03G1151800;TraesCS2A03G0129000;TraesCS2A03G0810500;TraesCS7D03G1033100;TraesCS1A03G1040400
GO:0051346	negative regulation of hydrolase activity	0.04	0.04	169	6 (3.55%)	TraesCS1A03G1048300;TraesCS3B03G0522200;TraesCS3B03G0953200;TraesCS3A03G0444200;TraesCS1D03G0640600;TraesCS2D03G0269600
GO:0072521	purine-containing compound metabolic process	0.04	0.04	613	15 (2.45%)	TraesCS6B03G0732400;TraesCS7D03G0553900;TraesCS6A03G0601600;TraesCS5B03G0703200;TraesCS5D03G0860800;TraesCS1D03G1043500;TraesCS5D03G0303800;TraesCS6A03G0617100;TraesCS7A03G0571800;TraesCS1B03G1279700;TraesCS1A03G1082100;TraesCS3D03G0816100;TraesCS1D03G0815700;TraesCS6D03G0525200;TraesCS6D03G0505200
GO:0019438	aromatic compound biosynthetic process	0.04	0.05	2655	50 (1.88%)	TraesCS6B03G0732400;TraesCS6A03G0601600;TraesCS1D03G0544900;TraesCS2B03G0104900;TraesCS5A03G0149600;TraesCS6D03G0011000;TraesCS5A03G0785100;TraesCS6B03G0041900;TraesCS6A03G0853900;TraesCS3D03G0404300;TraesCS4B03G0335600;TraesCS6B03G0854800;TraesCS6D03G0525200;TraesCS5D03G0860800;TraesCS1D03G1043500;TraesCS6A03G0617100;TraesCS7D03G0286800;TraesCS2B03G1015200;TraesCS2D03G0931100;TraesCS2A03G0604300…
GO:1901362	organic cyclic compound biosynthetic process	0.04	0.04	2877	54 (1.88%)	TraesCS6B03G0732400;TraesCS6A03G0601600;TraesCS1D03G0544900;TraesCS2B03G0104900;TraesCS5A03G0149600;TraesCS6D03G0011000;TraesCS5A03G0785100;TraesCS6B03G0041900;TraesCS2D03G0804700;TraesCS6A03G0853900;TraesCS3D03G0404300;TraesCS4B03G0335600;TraesCS6B03G0854800;TraesCS6D03G0525200;TraesCS5D03G0063200;TraesCS5D03G0860800;TraesCS1D03G1043500;TraesCS6A03G0617100;TraesCS7D03G0286800;TraesCS2B03G1015200…
GO:0006952	defense response	0.04	0.05	729	17 (2.33%)	TraesCS3D03G0794300;TraesCS3A03G0865900;TraesCS3B03G0989400;TraesCS7D03G0891400;TraesCS4B03G0840800;TraesCS1B03G0036700;TraesCS3B03G0522200;TraesCS6A03G0313000;TraesCS3A03G0933300;TraesCS6B03G0404800;TraesCS3A03G0444200;TraesCS3B03G0673300;TraesCS5B03G0217600;TraesCS6D03G0268300;TraesCS2B03G0812900;TraesCS2B03G0102100;TraesCS2D03G0269600
GO:0009636	response to toxic substance	0.04	0.04	167	6 (3.59%)	TraesCS1B03G0139900;TraesCS2A03G1241200;TraesCS3B03G0517500;TraesCS2D03G0830600;TraesCS7D03G0509700;TraesCS7B03G0347800
GO:0070919	production of siRNA involved in gene silencing by small RNA	0.04	0.05	3	1 (33.33%)	TraesCS1B03G0515500
GO:0017003	protein-heme linkage	0.04	0.05	3	1 (33.33%)	TraesCS1B03G0636600
GO:0000024	maltose biosynthetic process	0.04	0.05	3	1 (33.33%)	TraesCS1B03G0659600
GO:0046685	response to arsenic-containing substance	0.04	0.05	3	1 (33.33%)	TraesCS1D03G0526900
GO:0007389	pattern specification process	0.04	0.05	53	3 (5.66%)	TraesCS2B03G0545900;TraesCS1D03G0637600;TraesCS5B03G0217600
GO:0061458	reproductive system development	0.04	0.04	407	11 (2.7%)	TraesCS7D03G0506000;TraesCS6B03G0719500;TraesCS2B03G0545900;TraesCS5A03G0463400;TraesCS6A03G0592200;TraesCS1D03G0637600;TraesCS4A03G0796400;TraesCS7D03G1033100;TraesCS4A03G0569900;TraesCS7B03G0905900;TraesCS5B03G0457900
GO:0048608	reproductive structure development	0.04	0.04	407	11 (2.7%)	TraesCS7D03G0506000;TraesCS6B03G0719500;TraesCS2B03G0545900;TraesCS5A03G0463400;TraesCS6A03G0592200;TraesCS1D03G0637600;TraesCS4A03G0796400;TraesCS7D03G1033100;TraesCS4A03G0569900;TraesCS7B03G0905900;TraesCS5B03G0457900
GO:0009186	deoxyribonucleoside diphosphate metabolic process	0.04	0.05	3	1 (33.33%)	TraesCS2A03G0302300
GO:0009189	deoxyribonucleoside diphosphate biosynthetic process	0.04	0.05	3	1 (33.33%)	TraesCS2A03G0302300
GO:0009196	pyrimidine deoxyribonucleoside diphosphate metabolic process	0.04	0.05	3	1 (33.33%)	TraesCS2A03G0302300
GO:0009197	pyrimidine deoxyribonucleoside diphosphate biosynthetic process	0.04	0.05	3	1 (33.33%)	TraesCS2A03G0302300
GO:0046072	dTDP metabolic process	0.04	0.05	3	1 (33.33%)	TraesCS2A03G0302300
GO:0006233	dTDP biosynthetic process	0.04	0.05	3	1 (33.33%)	TraesCS2A03G0302300
GO:0006873	cellular ion homeostasis	0.04	0.05	128	5 (3.91%)	TraesCS2D03G0141700;TraesCS4A03G1151800;TraesCS2A03G0810500;TraesCS7D03G0062200;TraesCS7D03G1033100
GO:0055076	transition metal ion homeostasis	0.04	0.04	87	4 (4.6%)	TraesCS4A03G1151800;TraesCS2A03G0810500;TraesCS7D03G0062200;TraesCS7D03G1033100
GO:0033388	putrescine biosynthetic process from arginine	0.04	0.05	3	1 (33.33%)	TraesCS2B03G0102100
GO:0006458	'de novo' protein folding	0.04	0.05	22	2 (9.09%)	TraesCS2B03G0419300;TraesCS7D03G0654000
GO:0051084	'de novo' posttranslational protein folding	0.04	0.04	21	2 (9.52%)	TraesCS2B03G0419300;TraesCS7D03G0654000
GO:0051085	chaperone cofactor-dependent protein refolding	0.04	0.04	21	2 (9.52%)	TraesCS2B03G0419300;TraesCS7D03G0654000
GO:0007129	homologous chromosome pairing at meiosis	0.04	0.05	23	2 (8.7%)	TraesCS2D03G0664300;TraesCS2B03G0796300
GO:0043572	plastid fission	0.04	0.05	23	2 (8.7%)	TraesCS2B03G1296100;TraesCS7A03G0844200
GO:0010020	chloroplast fission	0.04	0.05	23	2 (8.7%)	TraesCS2B03G1296100;TraesCS7A03G0844200
GO:0051674	localization of cell	0.04	0.05	3	1 (33.33%)	TraesCS2D03G0427900
GO:0048870	cell motility	0.04	0.05	3	1 (33.33%)	TraesCS2D03G0427900
GO:0006213	pyrimidine nucleoside metabolic process	0.04	0.05	3	1 (33.33%)	TraesCS3A03G0640300
GO:0046131	pyrimidine ribonucleoside metabolic process	0.04	0.05	3	1 (33.33%)	TraesCS3A03G0640300
GO:0046087	cytidine metabolic process	0.04	0.05	3	1 (33.33%)	TraesCS3A03G0640300
GO:0046135	pyrimidine nucleoside catabolic process	0.04	0.05	3	1 (33.33%)	TraesCS3A03G0640300
GO:0046133	pyrimidine ribonucleoside catabolic process	0.04	0.05	3	1 (33.33%)	TraesCS3A03G0640300
GO:0006216	cytidine catabolic process	0.04	0.05	3	1 (33.33%)	TraesCS3A03G0640300
GO:0009972	cytidine deamination	0.04	0.05	3	1 (33.33%)	TraesCS3A03G0640300
GO:1990641	response to iron ion starvation	0.04	0.05	3	1 (33.33%)	TraesCS3A03G0933300
GO:0046415	urate metabolic process	0.04	0.05	3	1 (33.33%)	TraesCS3D03G0816100
GO:0019628	urate catabolic process	0.04	0.05	3	1 (33.33%)	TraesCS3D03G0816100
GO:0006720	isoprenoid metabolic process	0.04	0.04	261	8 (3.07%)	TraesCS7A03G0571800;TraesCS6B03G0350100;TraesCS7D03G0553900;TraesCS6D03G0214700;TraesCS5D03G0063200;TraesCS5B03G0703200;TraesCS4A03G0796400;TraesCS6A03G0262500
GO:0043570	maintenance of DNA repeat elements	0.04	0.05	3	1 (33.33%)	TraesCS4D03G0040400
GO:0051495	positive regulation of cytoskeleton organization	0.04	0.05	3	1 (33.33%)	TraesCS5A03G0035400
GO:1902905	positive regulation of supramolecular fiber organization	0.04	0.05	3	1 (33.33%)	TraesCS5A03G0035400
GO:0009450	gamma-aminobutyric acid catabolic process	0.04	0.05	3	1 (33.33%)	TraesCS6A03G0376800
GO:0043101	purine-containing compound salvage	0.04	0.05	22	2 (9.09%)	TraesCS6D03G0525200;TraesCS6A03G0617100
GO:0010023	proanthocyanidin biosynthetic process	0.04	0.05	3	1 (33.33%)	TraesCS6D03G0011000
GO:0006629	lipid metabolic process	0.05	0.05	2008	39 (1.94%)	TraesCS6B03G0350100;TraesCS2B03G0983100;TraesCS4A03G0169500;TraesCS6D03G0214700;TraesCS1D03G0026400;TraesCS1D03G0874400;TraesCS1A03G0606500;TraesCS2A03G0926800;TraesCS7A03G0571800;TraesCS1B03G0495700;TraesCS3B03G0953000;TraesCS5A03G0800900;TraesCS6B03G0634300;TraesCS1B03G0495300;TraesCS5A03G0441000;TraesCS3D03G0603700;TraesCS4D03G0639000;TraesCS6D03G0471300;TraesCS4B03G0645200;TraesCS3D03G1185400…
GO:0034641	cellular nitrogen compound metabolic process	0.05	0.05	7697	130 (1.69%)	TraesCS5D03G0824300;TraesCS1B03G0139900;TraesCS5B03G1168500;TraesCS5A03G0149600;TraesCS7A03G0571800;TraesCS4B03G0857300;TraesCS5A03G0785100;TraesCS3D03G0978800;TraesCS6B03G0041900;TraesCS2D03G0804700;TraesCS3D03G0404300;TraesCS4B03G0335600;TraesCS6B03G0854800;TraesCS3A03G0224100;TraesCS4D03G0331800;TraesCS7D03G0553900;TraesCS3D03G0337600;TraesCS5D03G0860800;TraesCS5D03G1121600;TraesCS5D03G0303800…
GO:0032787	monocarboxylic acid metabolic process	0.05	0.05	737	17 (2.31%)	TraesCS5B03G0833900;TraesCS3D03G0337600;TraesCS1D03G0581300;TraesCS5D03G0860800;TraesCS6A03G0376800;TraesCS7B03G0355300;TraesCS1A03G0606500;TraesCS5D03G0303800;TraesCS2A03G0926800;TraesCS2D03G0644900;TraesCS5A03G0800900;TraesCS2B03G1015200;TraesCS4D03G0639000;TraesCS7D03G0516600;TraesCS1D03G0815700;TraesCS5D03G0758500;TraesCS3D03G1185400
GO:0032956	regulation of actin cytoskeleton organization	0.05	0.05	55	3 (5.45%)	TraesCS2D03G0427900;TraesCS1A03G0826700;TraesCS2B03G0320600
GO:0030162	regulation of proteolysis	0.05	0.05	179	6 (3.35%)	TraesCS1A03G1048300;TraesCS3B03G0522200;TraesCS3A03G0444200;TraesCS5A03G1157500;TraesCS1D03G0640600;TraesCS2D03G0269600
GO:0043086	negative regulation of catalytic activity	0.05	0.06	226	7 (3.1%)	TraesCS1A03G1048300;TraesCS2D03G0065300;TraesCS3B03G0522200;TraesCS3B03G0953200;TraesCS3A03G0444200;TraesCS1D03G0640600;TraesCS2D03G0269600
GO:0046470	phosphatidylcholine metabolic process	0.05	0.05	55	3 (5.45%)	TraesCS1D03G0874500;TraesCS3D03G0603700;TraesCS1D03G0874400
GO:0055065	metal ion homeostasis	0.05	0.06	136	5 (3.68%)	TraesCS2D03G0141700;TraesCS4A03G1151800;TraesCS2A03G0810500;TraesCS7D03G0062200;TraesCS7D03G1033100
GO:0042440	pigment metabolic process	0.05	0.05	176	6 (3.41%)	TraesCS5D03G0063200;TraesCS2B03G0942900;TraesCS3A03G0433000;TraesCS3D03G0404300;TraesCS3A03G0224100;TraesCS2D03G0793400
GO:0044550	secondary metabolite biosynthetic process	0.05	0.06	94	4 (4.26%)	TraesCS2B03G1015200;TraesCS6A03G0429300;TraesCS3B03G0673300;TraesCS6D03G0011000

## Sheet: P0002BP
Gene Count:	463
Background Gene Count:	75477
Ontology:	E:\GOAnalyzer\Deployment\Data\gofiles\go-basic.obo
Annotation:	E:\GOAnalyzer\Deployment\data\gofiles\Gene-GO_association.wheat2022
Hierarchy:	biological_process
Correction:	BH FDR p-value adjustment
Max Path Length From Leaf:	N/A
Min Path Length From Root:	3
GO ID	Description	P-Value	Corrected P-Value	Total Genes	Matched Gene Counts	Matched Genes
GO:0048640	negative regulation of developmental growth	3.123e-06	3.509e-06	17	4 (23.53%)	TraesCS4A03G1100100;TraesCS7D03G0110700;TraesCS5D03G0785000;TraesCS5B03G0861500
GO:0046621	negative regulation of organ growth	3.123e-06	3.509e-06	17	4 (23.53%)	TraesCS4A03G1100100;TraesCS7D03G0110700;TraesCS5D03G0785000;TraesCS5B03G0861500
GO:0045926	negative regulation of growth	9.367e-06	1.052e-05	22	4 (18.18%)	TraesCS4A03G1100100;TraesCS7D03G0110700;TraesCS5D03G0785000;TraesCS5B03G0861500
GO:0046620	regulation of organ growth	3.376e-05	3.791e-05	30	4 (13.33%)	TraesCS4A03G1100100;TraesCS7D03G0110700;TraesCS5D03G0785000;TraesCS5B03G0861500
GO:0010438	cellular response to sulfur starvation	0.0001122	0.000126	3	2 (66.67%)	TraesCS1A03G0803800;TraesCS1D03G0772600
GO:0010439	regulation of glucosinolate biosynthetic process	0.0001122	0.000126	3	2 (66.67%)	TraesCS1A03G0803800;TraesCS1D03G0772600
GO:0006552	leucine catabolic process	0.0002235	0.0002508	4	2 (50%)	TraesCS1D03G0418400;TraesCS1B03G0593700
GO:0010675	regulation of cellular carbohydrate metabolic process	0.0003238	0.0003634	22	3 (13.64%)	TraesCS3A03G0185400;TraesCS1A03G0803800;TraesCS1D03G0772600
GO:0000272	polysaccharide catabolic process	0.000446	0.0005004	219	7 (3.2%)	TraesCS2D03G0467800;TraesCS5A03G1203000;TraesCS2A03G0034600;TraesCS2B03G0581400;TraesCS2B03G0051000;TraesCS2D03G0034000;TraesCS2A03G0461100
GO:0006109	regulation of carbohydrate metabolic process	0.0004771	0.0005351	25	3 (12%)	TraesCS3A03G0185400;TraesCS1A03G0803800;TraesCS1D03G0772600
GO:0051241	negative regulation of multicellular organismal process	0.0004872	0.0005464	59	4 (6.78%)	TraesCS4A03G1100100;TraesCS7D03G0110700;TraesCS5D03G0785000;TraesCS5B03G0861500
GO:0006537	glutamate biosynthetic process	0.0005541	0.0006213	6	2 (33.33%)	TraesCS3B03G0772100;TraesCS2A03G0267400
GO:0006851	mitochondrial calcium ion transmembrane transport	0.0005541	0.0006213	6	2 (33.33%)	TraesCS6D03G0508700;TraesCS2A03G0873900
GO:0051093	negative regulation of developmental process	0.000664	0.0007442	64	4 (6.25%)	TraesCS4A03G1100100;TraesCS7D03G0110700;TraesCS5D03G0785000;TraesCS5B03G0861500
GO:0030001	metal ion transport	0.0006744	0.0007558	729	13 (1.78%)	TraesCS7D03G0790500;TraesCS5B03G0639600;TraesCS5A03G0516300;TraesCS7A03G0847100;TraesCS3A03G0603100;TraesCS5B03G0679600;TraesCS6B03G0469400;TraesCS5D03G1106200;TraesCS6D03G0508700;TraesCS2A03G0873900;TraesCS5B03G0524300;TraesCS6A03G0389800;TraesCS6D03G0338000
GO:0005975	carbohydrate metabolic process	0.0006775	0.0007591	2685	31 (1.15%)	TraesCS6B03G0482100;TraesCS3D03G0745500;TraesCS2D03G0467800;TraesCS7B03G0170600;TraesCS5A03G1203000;TraesCS2A03G0930300;TraesCS5D03G0436800;TraesCS7B03G0626800;TraesCS2B03G0051000;TraesCS2D03G0034000;TraesCS3A03G0721100;TraesCS6A03G0903100;TraesCS6A03G0366200;TraesCS3D03G0582800;TraesCS3D03G0744600;TraesCS2B03G0581400;TraesCS2A03G0461100;TraesCS6D03G0127800;TraesCS5D03G1087800;TraesCS6A03G0136500…
GO:0015851	nucleobase transport	0.0007726	0.0008654	7	2 (28.57%)	TraesCS4B03G0172500;TraesCS4A03G0630200
GO:0006863	purine nucleobase transport	0.0007726	0.0008654	7	2 (28.57%)	TraesCS4B03G0172500;TraesCS4A03G0630200
GO:1900376	regulation of secondary metabolite biosynthetic process	0.001026	0.001149	8	2 (25%)	TraesCS1A03G0803800;TraesCS1D03G0772600
GO:0016310	phosphorylation	0.001085	0.001214	5575	53 (0.95%)	TraesCS3D03G0745500;TraesCS3B03G0782700;TraesCS3B03G0921800;TraesCS4A03G0337400;TraesCS4B03G0212900;TraesCS2B03G0583000;TraesCS4A03G0988800;TraesCS3A03G0209700;TraesCS4A03G0294900;TraesCS6D03G0064800;TraesCS4A03G0850500;TraesCS4D03G0516300;TraesCS1D03G0128200;TraesCS1D03G0782900;TraesCS7A03G1389600;TraesCS3B03G0253000;TraesCS3B03G0127400;TraesCS4D03G0424700;TraesCS1D03G0981600;TraesCS2B03G1512400…
GO:0008272	sulfate transport	0.001297	0.001452	35	3 (8.57%)	TraesCS2D03G1134400;TraesCS2A03G1181400;TraesCS2B03G1343300
GO:0009083	branched-chain amino acid catabolic process	0.001314	0.00147	9	2 (22.22%)	TraesCS1D03G0418400;TraesCS1B03G0593700
GO:0006468	protein phosphorylation	0.001477	0.001653	5255	50 (0.95%)	TraesCS3B03G0782700;TraesCS3B03G0921800;TraesCS4A03G0337400;TraesCS4B03G0212900;TraesCS2B03G0583000;TraesCS4A03G0988800;TraesCS3A03G0209700;TraesCS4A03G0294900;TraesCS6D03G0064800;TraesCS4A03G0850500;TraesCS4D03G0516300;TraesCS1D03G0128200;TraesCS1D03G0782900;TraesCS7A03G1389600;TraesCS3B03G0253000;TraesCS3B03G0127400;TraesCS4D03G0424700;TraesCS1D03G0981600;TraesCS2B03G1512400;TraesCS5D03G1158700…
GO:0072348	sulfur compound transport	0.001526	0.001707	37	3 (8.11%)	TraesCS2D03G1134400;TraesCS2A03G1181400;TraesCS2B03G1343300
GO:0009267	cellular response to starvation	0.001676	0.001874	82	4 (4.88%)	TraesCS1A03G0947000;TraesCS1A03G0803800;TraesCS1D03G0772600;TraesCS2A03G1299200
GO:0016052	carbohydrate catabolic process	0.001737	0.001942	439	9 (2.05%)	TraesCS3D03G0745500;TraesCS2D03G0467800;TraesCS5A03G1203000;TraesCS2A03G0034600;TraesCS2B03G0581400;TraesCS2B03G0051000;TraesCS2D03G0034000;TraesCS5B03G0253800;TraesCS2A03G0461100
GO:0031669	cellular response to nutrient levels	0.002083	0.002328	87	4 (4.6%)	TraesCS1A03G0947000;TraesCS1A03G0803800;TraesCS1D03G0772600;TraesCS2A03G1299200
GO:0042594	response to starvation	0.002263	0.002528	89	4 (4.49%)	TraesCS1A03G0947000;TraesCS1A03G0803800;TraesCS1D03G0772600;TraesCS2A03G1299200
GO:0051049	regulation of transport	0.002356	0.002633	90	4 (4.44%)	TraesCS1A03G0947000;TraesCS5D03G0785000;TraesCS3A03G0603100;TraesCS5B03G0861500
GO:0044238	primary metabolic process	0.002436	0.002721	21331	159 (0.75%)	TraesCS1A03G0782200;TraesCS3B03G0772100;TraesCS2D03G0467800;TraesCS3B03G0782700;TraesCS5B03G0536200;TraesCS6B03G1127700;TraesCS7A03G0511500;TraesCS6B03G1230200;TraesCS7B03G0817800;TraesCS2A03G0395000;TraesCS5A03G0948200;TraesCS4D03G0618500;TraesCS7B03G0116500;TraesCS2B03G0051000;TraesCS1A03G0703100;TraesCS6B03G0424000;TraesCS2B03G1207400;TraesCS4A03G0294900;TraesCS2B03G1396700;TraesCS6D03G0064800…
GO:0048638	regulation of developmental growth	0.002654	0.002964	93	4 (4.3%)	TraesCS4A03G1100100;TraesCS7D03G0110700;TraesCS5D03G0785000;TraesCS5B03G0861500
GO:2000012	regulation of auxin polar transport	0.002801	0.003127	13	2 (15.38%)	TraesCS5D03G0785000;TraesCS5B03G0861500
GO:0008299	isoprenoid biosynthetic process	0.003073	0.00343	229	6 (2.62%)	TraesCS2A03G0458300;TraesCS6B03G0720000;TraesCS2D03G1118600;TraesCS3D03G0597600;TraesCS4D03G0618500;TraesCS4B03G0700700
GO:0071496	cellular response to external stimulus	0.00309	0.003448	97	4 (4.12%)	TraesCS1A03G0947000;TraesCS1A03G0803800;TraesCS1D03G0772600;TraesCS2A03G1299200
GO:0031668	cellular response to extracellular stimulus	0.00309	0.003448	97	4 (4.12%)	TraesCS1A03G0947000;TraesCS1A03G0803800;TraesCS1D03G0772600;TraesCS2A03G1299200
GO:0055085	transmembrane transport	0.003171	0.003538	3222	33 (1.02%)	TraesCS3B03G0858600;TraesCS5B03G0639600;TraesCS4B03G0172500;TraesCS5A03G0516300;TraesCS3A03G0603100;TraesCS2B03G1343300;TraesCS5B03G0679600;TraesCS2A03G1051800;TraesCS5B03G0054000;TraesCS2B03G1176900;TraesCS6D03G0508700;TraesCS7B03G0152500;TraesCS1B03G1068800;TraesCS5B03G0524300;TraesCS6A03G0389800;TraesCS7D03G1225400;TraesCS6D03G0338000;TraesCS2A03G1181400;TraesCS2D03G1134400;TraesCS1A03G0737000…
GO:0006813	potassium ion transport	0.003206	0.003576	160	5 (3.12%)	TraesCS5A03G0516300;TraesCS5B03G0524300;TraesCS6A03G0389800;TraesCS6D03G0338000;TraesCS3A03G0603100
GO:0031667	response to nutrient levels	0.003325	0.003708	99	4 (4.04%)	TraesCS1A03G0947000;TraesCS1A03G0803800;TraesCS1D03G0772600;TraesCS2A03G1299200
GO:0006796	phosphate-containing compound metabolic process	0.003398	0.003788	6989	61 (0.87%)	TraesCS3D03G0745500;TraesCS3B03G0782700;TraesCS3B03G0921800;TraesCS5B03G0536200;TraesCS6B03G1127700;TraesCS4A03G0337400;TraesCS4B03G0212900;TraesCS2A03G0395000;TraesCS2B03G0583000;TraesCS2A03G0458300;TraesCS4A03G0988800;TraesCS3A03G0209700;TraesCS4A03G0294900;TraesCS6D03G0064800;TraesCS4A03G0850500;TraesCS4D03G0516300;TraesCS1D03G0128200;TraesCS1D03G0782900;TraesCS7A03G1389600;TraesCS3B03G0253000…
GO:0006793	phosphorus metabolic process	0.003629	0.004044	7010	61 (0.87%)	TraesCS3D03G0745500;TraesCS3B03G0782700;TraesCS3B03G0921800;TraesCS5B03G0536200;TraesCS6B03G1127700;TraesCS4A03G0337400;TraesCS4B03G0212900;TraesCS2A03G0395000;TraesCS2B03G0583000;TraesCS2A03G0458300;TraesCS4A03G0988800;TraesCS3A03G0209700;TraesCS4A03G0294900;TraesCS6D03G0064800;TraesCS4A03G0850500;TraesCS4D03G0516300;TraesCS1D03G0128200;TraesCS1D03G0782900;TraesCS7A03G1389600;TraesCS3B03G0253000…
GO:0043255	regulation of carbohydrate biosynthetic process	0.00374	0.004167	15	2 (13.33%)	TraesCS1A03G0803800;TraesCS1D03G0772600
GO:0006551	leucine metabolic process	0.00374	0.004167	15	2 (13.33%)	TraesCS1D03G0418400;TraesCS1B03G0593700
GO:0032879	regulation of localization	0.003832	0.004269	103	4 (3.88%)	TraesCS1A03G0947000;TraesCS5D03G0785000;TraesCS3A03G0603100;TraesCS5B03G0861500
GO:0006811	ion transport	0.00419	0.004666	1564	19 (1.21%)	TraesCS2D03G1134400;TraesCS1A03G0947000;TraesCS7D03G0790500;TraesCS5B03G0639600;TraesCS1A03G0737000;TraesCS5A03G0516300;TraesCS7A03G0847100;TraesCS3A03G0603100;TraesCS2B03G1343300;TraesCS5B03G0679600;TraesCS6B03G0469400;TraesCS5D03G1106200;TraesCS6D03G0508700;TraesCS2A03G0873900;TraesCS7B03G0152500;TraesCS5B03G0524300;TraesCS6A03G0389800;TraesCS6D03G0338000;TraesCS2A03G1181400
GO:0007154	cell communication	0.004981	0.005547	1826	21 (1.15%)	TraesCS3D03G0637200;TraesCS4A03G0850500;TraesCS3D03G0745500;TraesCS1A03G0947000;TraesCS3A03G0696000;TraesCS3B03G0921800;TraesCS4A03G0505200;TraesCS4D03G0424700;TraesCS3B03G0922000;TraesCS3B03G0793900;TraesCS4B03G0668600;TraesCS4A03G0112900;TraesCS5D03G1158700;TraesCS1A03G0803800;TraesCS6B03G0424000;TraesCS1D03G0772600;TraesCS3A03G0265900;TraesCS4A03G0294900;TraesCS1A03G0316200;TraesCS2A03G1299200…
GO:0005992	trehalose biosynthetic process	0.004996	0.005563	56	3 (5.36%)	TraesCS3D03G0665100;TraesCS3A03G0721100;TraesCS6A03G0903100
GO:0009991	response to extracellular stimulus	0.005156	0.005739	112	4 (3.57%)	TraesCS1A03G0947000;TraesCS1A03G0803800;TraesCS1D03G0772600;TraesCS2A03G1299200
GO:0062012	regulation of small molecule metabolic process	0.00525	0.005842	57	3 (5.26%)	TraesCS3A03G0185400;TraesCS1A03G0803800;TraesCS1D03G0772600
GO:0009646	response to absence of light	0.005383	0.005989	18	2 (11.11%)	TraesCS1D03G0418400;TraesCS1B03G0593700
GO:0036211	protein modification process	0.005613	0.006243	7436	63 (0.85%)	TraesCS3B03G0782700;TraesCS3B03G0921800;TraesCS6B03G1127700;TraesCS4A03G0337400;TraesCS4B03G0212900;TraesCS2B03G0583000;TraesCS4A03G0988800;TraesCS6B03G0424000;TraesCS3A03G0209700;TraesCS2B03G1207400;TraesCS4A03G0294900;TraesCS6D03G0064800;TraesCS4A03G0850500;TraesCS4D03G0516300;TraesCS1D03G0128200;TraesCS1D03G0782900;TraesCS7A03G1389600;TraesCS3B03G0253000;TraesCS3B03G0127400;TraesCS4D03G0424700…
GO:0006464	cellular protein modification process	0.005613	0.006243	7436	63 (0.85%)	TraesCS3B03G0782700;TraesCS3B03G0921800;TraesCS6B03G1127700;TraesCS4A03G0337400;TraesCS4B03G0212900;TraesCS2B03G0583000;TraesCS4A03G0988800;TraesCS6B03G0424000;TraesCS3A03G0209700;TraesCS2B03G1207400;TraesCS4A03G0294900;TraesCS6D03G0064800;TraesCS4A03G0850500;TraesCS4D03G0516300;TraesCS1D03G0128200;TraesCS1D03G0782900;TraesCS7A03G1389600;TraesCS3B03G0253000;TraesCS3B03G0127400;TraesCS4D03G0424700…
GO:0009733	response to auxin	0.005661	0.006295	526	9 (1.71%)	TraesCS3D03G0903800;TraesCS3A03G0968000;TraesCS6A03G0622800;TraesCS6A03G0851500;TraesCS6A03G0851700;TraesCS3A03G0265900;TraesCS6A03G0851900;TraesCS5D03G0785000;TraesCS5B03G0861500
GO:0006720	isoprenoid metabolic process	0.005774	0.006419	261	6 (2.3%)	TraesCS2A03G0458300;TraesCS6B03G0720000;TraesCS2D03G1118600;TraesCS3D03G0597600;TraesCS4D03G0618500;TraesCS4B03G0700700
GO:0005991	trehalose metabolic process	0.005781	0.006425	59	3 (5.08%)	TraesCS3D03G0665100;TraesCS3A03G0721100;TraesCS6A03G0903100
GO:0006687	glycosphingolipid metabolic process	0.005992	0.006659	19	2 (10.53%)	TraesCS3D03G0845900;TraesCS7B03G0626800
GO:0006677	glycosylceramide metabolic process	0.005992	0.006659	19	2 (10.53%)	TraesCS3D03G0845900;TraesCS7B03G0626800
GO:0006678	glucosylceramide metabolic process	0.005992	0.006659	19	2 (10.53%)	TraesCS3D03G0845900;TraesCS7B03G0626800
GO:0042762	regulation of sulfur metabolic process	0.0073	0.00811	21	2 (9.52%)	TraesCS1A03G0803800;TraesCS1D03G0772600
GO:0043455	regulation of secondary metabolic process	0.008724	0.009689	23	2 (8.7%)	TraesCS1A03G0803800;TraesCS1D03G0772600
GO:0034765	regulation of ion transmembrane transport	0.009478	0.01	24	2 (8.33%)	TraesCS1A03G0947000;TraesCS3A03G0603100
GO:0010966	regulation of phosphate transport	0.01	0.01	2	1 (50%)	TraesCS1A03G0947000
GO:1903959	regulation of anion transmembrane transport	0.01	0.01	2	1 (50%)	TraesCS1A03G0947000
GO:1903795	regulation of inorganic anion transmembrane transport	0.01	0.01	2	1 (50%)	TraesCS1A03G0947000
GO:2000185	regulation of phosphate transmembrane transport	0.01	0.01	2	1 (50%)	TraesCS1A03G0947000
GO:0043412	macromolecule modification	0.01	0.01	7831	64 (0.82%)	TraesCS3B03G0782700;TraesCS3B03G0921800;TraesCS6B03G1127700;TraesCS4A03G0337400;TraesCS4B03G0212900;TraesCS2B03G0583000;TraesCS4A03G0988800;TraesCS6B03G0424000;TraesCS3A03G0209700;TraesCS2B03G1207400;TraesCS4A03G0294900;TraesCS6D03G0064800;TraesCS4A03G0850500;TraesCS4D03G0516300;TraesCS1D03G0128200;TraesCS1D03G0782900;TraesCS7A03G1389600;TraesCS3B03G0253000;TraesCS3B03G0127400;TraesCS7B03G0591100…
GO:0005997	xylulose metabolic process	0.01	0.01	2	1 (50%)	TraesCS2A03G0300400
GO:0051239	regulation of multicellular organismal process	0.01	0.01	226	5 (2.21%)	TraesCS4A03G1100100;TraesCS7D03G0110700;TraesCS2A03G0664500;TraesCS5D03G0785000;TraesCS5B03G0861500
GO:0006144	purine nucleobase metabolic process	0.01	0.02	29	2 (6.9%)	TraesCS2A03G0874800;TraesCS2A03G1299200
GO:1902395	regulation of 1-deoxy-D-xylulose-5-phosphate synthase activity	0.01	0.01	2	1 (50%)	TraesCS3A03G0185400
GO:0046351	disaccharide biosynthetic process	0.01	0.01	79	3 (3.8%)	TraesCS3D03G0665100;TraesCS3A03G0721100;TraesCS6A03G0903100
GO:0052746	inositol phosphorylation	0.01	0.01	2	1 (50%)	TraesCS7B03G0170600
GO:0071704	organic substance metabolic process	0.02	0.02	22718	161 (0.71%)	TraesCS1A03G0782200;TraesCS3B03G0772100;TraesCS2D03G0467800;TraesCS3B03G0782700;TraesCS5B03G0536200;TraesCS3A03G0166800;TraesCS6B03G1127700;TraesCS7A03G0511500;TraesCS6B03G1230200;TraesCS7B03G0817800;TraesCS2A03G0395000;TraesCS5A03G0948200;TraesCS4D03G0618500;TraesCS7B03G0116500;TraesCS2B03G0051000;TraesCS1A03G0703100;TraesCS6B03G0424000;TraesCS2B03G1207400;TraesCS4A03G0294900;TraesCS2B03G1396700…
GO:0006812	cation transport	0.02	0.02	1225	14 (1.14%)	TraesCS7D03G0790500;TraesCS5B03G0639600;TraesCS1A03G0737000;TraesCS5A03G0516300;TraesCS7A03G0847100;TraesCS3A03G0603100;TraesCS5B03G0679600;TraesCS6B03G0469400;TraesCS5D03G1106200;TraesCS6D03G0508700;TraesCS2A03G0873900;TraesCS5B03G0524300;TraesCS6A03G0389800;TraesCS6D03G0338000
GO:0015698	inorganic anion transport	0.02	0.02	161	4 (2.48%)	TraesCS2D03G1134400;TraesCS1A03G0947000;TraesCS2A03G1181400;TraesCS2B03G1343300
GO:0043269	regulation of ion transport	0.02	0.02	33	2 (6.06%)	TraesCS1A03G0947000;TraesCS3A03G0603100
GO:0009064	glutamine family amino acid metabolic process	0.02	0.02	164	4 (2.44%)	TraesCS3B03G0772100;TraesCS2A03G0267400;TraesCS2B03G0793700;TraesCS1A03G1039400
GO:0045490	pectin catabolic process	0.02	0.02	90	3 (3.33%)	TraesCS2A03G0034600;TraesCS2B03G0051000;TraesCS2D03G0034000
GO:0006536	glutamate metabolic process	0.02	0.02	34	2 (5.88%)	TraesCS3B03G0772100;TraesCS2A03G0267400
GO:0043650	dicarboxylic acid biosynthetic process	0.02	0.02	33	2 (6.06%)	TraesCS3B03G0772100;TraesCS2A03G0267400
GO:0006629	lipid metabolic process	0.02	0.03	2008	20 (1%)	TraesCS5A03G0794000;TraesCS3B03G0993100;TraesCS5A03G0345800;TraesCS5B03G0536200;TraesCS7D03G0321800;TraesCS5D03G0749100;TraesCS3D03G0845900;TraesCS7B03G0626800;TraesCS2A03G0395000;TraesCS5B03G0760300;TraesCS2A03G0458300;TraesCS6B03G0720000;TraesCS2D03G1118500;TraesCS2D03G1118600;TraesCS3D03G0597600;TraesCS5A03G0948200;TraesCS4D03G0618500;TraesCS7B03G0116500;TraesCS4B03G0700700;TraesCS5D03G0904300
GO:0050993	dimethylallyl diphosphate metabolic process	0.02	0.03	4	1 (25%)	TraesCS2A03G0458300
GO:0050992	dimethylallyl diphosphate biosynthetic process	0.02	0.03	4	1 (25%)	TraesCS2A03G0458300
GO:0000256	allantoin catabolic process	0.02	0.02	3	1 (33.33%)	TraesCS2A03G1299200
GO:0006145	purine nucleobase catabolic process	0.02	0.03	4	1 (25%)	TraesCS2A03G1299200
GO:0010135	ureide metabolic process	0.02	0.03	4	1 (25%)	TraesCS2A03G1299200
GO:0010136	ureide catabolic process	0.02	0.03	4	1 (25%)	TraesCS2A03G1299200
GO:0036503	ERAD pathway	0.02	0.03	38	2 (5.26%)	TraesCS6B03G0424000;TraesCS2D03G0845100
GO:0035966	response to topologically incorrect protein	0.02	0.02	33	2 (6.06%)	TraesCS6B03G0424000;TraesCS2D03G0845100
GO:0035967	cellular response to topologically incorrect protein	0.02	0.02	33	2 (6.06%)	TraesCS6B03G0424000;TraesCS2D03G0845100
GO:0009312	oligosaccharide biosynthetic process	0.02	0.03	99	3 (3.03%)	TraesCS3D03G0665100;TraesCS3A03G0721100;TraesCS6A03G0903100
GO:0007167	enzyme linked receptor protein signaling pathway	0.02	0.03	39	2 (5.13%)	TraesCS3B03G0921800;TraesCS3B03G0922000
GO:0007178	transmembrane receptor protein serine/threonine kinase signaling pathway	0.02	0.03	39	2 (5.13%)	TraesCS3B03G0921800;TraesCS3B03G0922000
GO:0006688	glycosphingolipid biosynthetic process	0.02	0.02	3	1 (33.33%)	TraesCS3D03G0845900
GO:0046476	glycosylceramide biosynthetic process	0.02	0.02	3	1 (33.33%)	TraesCS3D03G0845900
GO:0006679	glucosylceramide biosynthetic process	0.02	0.02	3	1 (33.33%)	TraesCS3D03G0845900
GO:0040008	regulation of growth	0.02	0.02	171	4 (2.34%)	TraesCS4A03G1100100;TraesCS7D03G0110700;TraesCS5D03G0785000;TraesCS5B03G0861500
GO:0006814	sodium ion transport	0.02	0.02	34	2 (5.88%)	TraesCS5B03G0679600;TraesCS5B03G0639600
GO:0044242	cellular lipid catabolic process	0.02	0.02	90	3 (3.33%)	TraesCS7B03G0626800;TraesCS7B03G0116500;TraesCS7D03G0321800
GO:0009062	fatty acid catabolic process	0.02	0.02	35	2 (5.71%)	TraesCS7B03G0116500;TraesCS7D03G0321800
GO:0034440	lipid oxidation	0.02	0.03	39	2 (5.13%)	TraesCS7B03G0116500;TraesCS7D03G0321800
GO:0019395	fatty acid oxidation	0.02	0.02	35	2 (5.71%)	TraesCS7B03G0116500;TraesCS7D03G0321800
GO:0006635	fatty acid beta-oxidation	0.02	0.02	34	2 (5.88%)	TraesCS7B03G0116500;TraesCS7D03G0321800
GO:0048871	multicellular organismal homeostasis	0.02	0.02	3	1 (33.33%)	TraesCS7D03G0759300
GO:0097009	energy homeostasis	0.02	0.02	3	1 (33.33%)	TraesCS7D03G0759300
GO:0051716	cellular response to stimulus	0.03	0.03	2283	22 (0.96%)	TraesCS3D03G0637200;TraesCS2A03G1311800;TraesCS3D03G0745500;TraesCS1A03G0947000;TraesCS1D03G0456700;TraesCS3A03G0696000;TraesCS3B03G0921800;TraesCS4A03G0505200;TraesCS2D03G0845100;TraesCS4D03G0424700;TraesCS3B03G0922000;TraesCS3B03G0793900;TraesCS4B03G0668600;TraesCS4A03G0112900;TraesCS1A03G0803800;TraesCS6B03G0424000;TraesCS1D03G0772600;TraesCS3A03G0265900;TraesCS4A03G0294900;TraesCS1A03G0316200…
GO:0007165	signal transduction	0.03	0.03	1278	14 (1.1%)	TraesCS3D03G0637200;TraesCS3D03G0745500;TraesCS3A03G0696000;TraesCS3B03G0921800;TraesCS4A03G0505200;TraesCS4D03G0424700;TraesCS3B03G0922000;TraesCS3B03G0793900;TraesCS4B03G0668600;TraesCS4A03G0112900;TraesCS6B03G0424000;TraesCS3A03G0265900;TraesCS4A03G0294900;TraesCS1A03G0316200
GO:0010033	response to organic substance	0.03	0.03	1169	13 (1.11%)	TraesCS3A03G0968000;TraesCS2D03G0845100;TraesCS5D03G0785000;TraesCS3D03G0903800;TraesCS3B03G0793900;TraesCS6A03G0622800;TraesCS6A03G0851500;TraesCS6A03G0851700;TraesCS6B03G0424000;TraesCS3A03G0265900;TraesCS6A03G0851900;TraesCS1A03G0316200;TraesCS5B03G0861500
GO:0044070	regulation of anion transport	0.03	0.03	5	1 (20%)	TraesCS1A03G0947000
GO:1901605	alpha-amino acid metabolic process	0.03	0.03	575	8 (1.39%)	TraesCS3B03G0772100;TraesCS2A03G0267400;TraesCS2B03G1435300;TraesCS1D03G0418400;TraesCS2B03G0793700;TraesCS1A03G1039400;TraesCS1B03G0593700;TraesCS4D03G0627300
GO:0007010	cytoskeleton organization	0.03	0.03	365	6 (1.64%)	TraesCS5B03G0976500;TraesCS1B03G0753200;TraesCS5A03G0926300;TraesCS1B03G0089300;TraesCS4B03G0666000;TraesCS7B03G0336700
GO:0070588	calcium ion transmembrane transport	0.03	0.04	47	2 (4.26%)	TraesCS6D03G0508700;TraesCS2A03G0873900
GO:0000255	allantoin metabolic process	0.03	0.03	5	1 (20%)	TraesCS2A03G1299200
GO:0010322	regulation of isopentenyl diphosphate biosynthetic process, methylerythritol 4-phosphate pathway	0.03	0.03	5	1 (20%)	TraesCS3A03G0185400
GO:0071805	potassium ion transmembrane transport	0.03	0.04	115	3 (2.61%)	TraesCS5A03G0516300;TraesCS5B03G0524300;TraesCS3A03G0603100
GO:0019408	dolichol biosynthetic process	0.03	0.03	5	1 (20%)	TraesCS4B03G0700700
GO:1901575	organic substance catabolic process	0.04	0.05	2138	20 (0.94%)	TraesCS3D03G0745500;TraesCS1A03G0947000;TraesCS2D03G0467800;TraesCS5A03G1203000;TraesCS7D03G1104100;TraesCS2B03G0581400;TraesCS3A03G0166800;TraesCS2A03G0461100;TraesCS2D03G0845100;TraesCS1B03G0593700;TraesCS7D03G0321800;TraesCS7B03G0626800;TraesCS1D03G0418400;TraesCS2A03G0034600;TraesCS7B03G0116500;TraesCS2B03G0051000;TraesCS2D03G0034000;TraesCS5B03G0253800;TraesCS6B03G0424000;TraesCS2A03G1299200
GO:0046395	carboxylic acid catabolic process	0.04	0.04	203	4 (1.97%)	TraesCS1D03G0418400;TraesCS7B03G0116500;TraesCS1B03G0593700;TraesCS7D03G0321800
GO:0043605	cellular amide catabolic process	0.04	0.04	6	1 (16.67%)	TraesCS2A03G1299200
GO:0046113	nucleobase catabolic process	0.04	0.05	7	1 (14.29%)	TraesCS2A03G1299200
GO:0002239	response to oomycetes	0.04	0.04	50	2 (4%)	TraesCS3B03G0921800;TraesCS3B03G0922000
GO:0002229	defense response to oomycetes	0.04	0.04	50	2 (4%)	TraesCS3B03G0921800;TraesCS3B03G0922000
GO:0016094	polyprenol biosynthetic process	0.04	0.05	7	1 (14.29%)	TraesCS4B03G0700700
GO:0030258	lipid modification	0.04	0.05	125	3 (2.4%)	TraesCS5B03G0536200;TraesCS7B03G0116500;TraesCS7D03G0321800
GO:0072329	monocarboxylic acid catabolic process	0.04	0.04	48	2 (4.17%)	TraesCS7B03G0116500;TraesCS7D03G0321800
GO:0033517	myo-inositol hexakisphosphate metabolic process	0.04	0.04	6	1 (16.67%)	TraesCS7B03G0170600
GO:0010264	myo-inositol hexakisphosphate biosynthetic process	0.04	0.04	6	1 (16.67%)	TraesCS7B03G0170600
GO:0009225	nucleotide-sugar metabolic process	0.05	0.05	56	2 (3.57%)	TraesCS1A03G0782200;TraesCS4B03G0653000
GO:0009056	catabolic process	0.05	0.05	2844	25 (0.88%)	TraesCS2B03G0308400;TraesCS3D03G0745500;TraesCS2D03G0467800;TraesCS5A03G1203000;TraesCS3A03G0166800;TraesCS2D03G0845100;TraesCS7D03G0321800;TraesCS7B03G0626800;TraesCS7B03G0116500;TraesCS2B03G0051000;TraesCS2D03G0034000;TraesCS6B03G0424000;TraesCS1A03G0947000;TraesCS7D03G0469500;TraesCS7D03G1104100;TraesCS2B03G0581400;TraesCS2A03G0461100;TraesCS1B03G0593700;TraesCS6A03G0279100;TraesCS1D03G0224800…
GO:0055081	anion homeostasis	0.05	0.05	8	1 (12.5%)	TraesCS1A03G0947000
GO:0072506	trivalent inorganic anion homeostasis	0.05	0.05	8	1 (12.5%)	TraesCS1A03G0947000
GO:0055062	phosphate ion homeostasis	0.05	0.05	8	1 (12.5%)	TraesCS1A03G0947000
GO:0034762	regulation of transmembrane transport	0.05	0.05	57	2 (3.51%)	TraesCS1A03G0947000;TraesCS3A03G0603100
GO:0009081	branched-chain amino acid metabolic process	0.05	0.05	58	2 (3.45%)	TraesCS1D03G0418400;TraesCS1B03G0593700
GO:0016054	organic acid catabolic process	0.05	0.05	217	4 (1.84%)	TraesCS1D03G0418400;TraesCS7B03G0116500;TraesCS1B03G0593700;TraesCS7D03G0321800
GO:0010393	galacturonan metabolic process	0.05	0.05	132	3 (2.27%)	TraesCS2A03G0034600;TraesCS2B03G0051000;TraesCS2D03G0034000
GO:0045488	pectin metabolic process	0.05	0.05	132	3 (2.27%)	TraesCS2A03G0034600;TraesCS2B03G0051000;TraesCS2D03G0034000
GO:0051788	response to misfolded protein	0.05	0.05	8	1 (12.5%)	TraesCS2D03G0845100
GO:0071218	cellular response to misfolded protein	0.05	0.05	8	1 (12.5%)	TraesCS2D03G0845100
GO:0071712	ER-associated misfolded protein catabolic process	0.05	0.05	8	1 (12.5%)	TraesCS2D03G0845100
GO:1903725	regulation of phospholipid metabolic process	0.05	0.05	8	1 (12.5%)	TraesCS3A03G0185400
GO:0071071	regulation of phospholipid biosynthetic process	0.05	0.05	8	1 (12.5%)	TraesCS3A03G0185400
GO:0005984	disaccharide metabolic process	0.05	0.05	130	3 (2.31%)	TraesCS3D03G0665100;TraesCS3A03G0721100;TraesCS6A03G0903100
GO:0046513	ceramide biosynthetic process	0.05	0.05	8	1 (12.5%)	TraesCS3D03G0845900
GO:0019348	dolichol metabolic process	0.05	0.05	8	1 (12.5%)	TraesCS4B03G0700700

## Sheet: P0010BP
Gene Count:	1587
Background Gene Count:	75477
Ontology:	E:\GOAnalyzer\Deployment\Data\gofiles\go-basic.obo
Annotation:	E:\GOAnalyzer\Deployment\data\gofiles\Gene-GO_association.wheat2022
Hierarchy:	biological_process
Correction:	BH FDR p-value adjustment
Max Path Length From Leaf:	N/A
Min Path Length From Root:	3
GO ID	Description	P-Value	Corrected P-Value	Total Genes	Matched Gene Counts	Matched Genes
GO:0006468	protein phosphorylation	4.313e-71	5.081e-71	5255	326 (6.2%)	TraesCS5B03G0387100;TraesCS6D03G0589900;TraesCS2A03G1079100;TraesCS6A03G0416200;TraesCS3B03G0115900;TraesCS4A03G0805400;TraesCS5A03G0031900;TraesCS6B03G0081400;TraesCS3D03G0376300;TraesCS2B03G0699900;TraesCS2A03G0133300;TraesCS3D03G0026300;TraesCS5D03G0376900;TraesCS4A03G0793100;TraesCS2B03G0183000;TraesCS3A03G1158600;TraesCS3A03G0654900;TraesCS1B03G0008600;TraesCS2B03G0189900;TraesCS1D03G0990700…
GO:0016310	phosphorylation	4.154e-67	4.893e-67	5575	330 (5.92%)	TraesCS5B03G0387100;TraesCS6D03G0589900;TraesCS2A03G1079100;TraesCS6A03G0416200;TraesCS3B03G0115900;TraesCS4A03G0805400;TraesCS5A03G0031900;TraesCS6B03G0081400;TraesCS3D03G0376300;TraesCS2B03G0699900;TraesCS2A03G0133300;TraesCS3D03G0026300;TraesCS5D03G0376900;TraesCS4A03G0793100;TraesCS2B03G0183000;TraesCS3A03G1158600;TraesCS3A03G0654900;TraesCS1B03G0008600;TraesCS2B03G0189900;TraesCS1D03G0990700…
GO:0036211	protein modification process	6.985e-54	8.224e-54	7436	364 (4.9%)	TraesCS5B03G0387100;TraesCS6D03G0589900;TraesCS2A03G1079100;TraesCS6A03G0416200;TraesCS3B03G0115900;TraesCS4A03G0805400;TraesCS5A03G0031900;TraesCS5A03G0516700;TraesCS6B03G0081400;TraesCS3D03G0376300;TraesCS2B03G0699900;TraesCS5B03G0524900;TraesCS2A03G0133300;TraesCS3D03G0026300;TraesCS5D03G0376900;TraesCS4A03G0793100;TraesCS2B03G0183000;TraesCS3A03G0222600;TraesCS3A03G1158600;TraesCS3A03G0654900…
GO:0006464	cellular protein modification process	6.985e-54	8.224e-54	7436	364 (4.9%)	TraesCS5B03G0387100;TraesCS6D03G0589900;TraesCS2A03G1079100;TraesCS6A03G0416200;TraesCS3B03G0115900;TraesCS4A03G0805400;TraesCS5A03G0031900;TraesCS5A03G0516700;TraesCS6B03G0081400;TraesCS3D03G0376300;TraesCS2B03G0699900;TraesCS5B03G0524900;TraesCS2A03G0133300;TraesCS3D03G0026300;TraesCS5D03G0376900;TraesCS4A03G0793100;TraesCS2B03G0183000;TraesCS3A03G0222600;TraesCS3A03G1158600;TraesCS3A03G0654900…
GO:0006796	phosphate-containing compound metabolic process	4.827e-52	5.682e-52	6989	346 (4.95%)	TraesCS5B03G0387100;TraesCS6D03G0589900;TraesCS2A03G1079100;TraesCS6A03G0416200;TraesCS3B03G0115900;TraesCS4A03G0805400;TraesCS5A03G0031900;TraesCS6B03G0081400;TraesCS3D03G0376300;TraesCS2B03G0699900;TraesCS2A03G0133300;TraesCS3D03G0026300;TraesCS5D03G0376900;TraesCS4A03G0793100;TraesCS2B03G0183000;TraesCS3A03G1158600;TraesCS3A03G0654900;TraesCS1B03G0008600;TraesCS2B03G0189900;TraesCS1D03G0990700…
GO:0006793	phosphorus metabolic process	9.551e-52	1.124e-51	7010	346 (4.94%)	TraesCS5B03G0387100;TraesCS6D03G0589900;TraesCS2A03G1079100;TraesCS6A03G0416200;TraesCS3B03G0115900;TraesCS4A03G0805400;TraesCS5A03G0031900;TraesCS6B03G0081400;TraesCS3D03G0376300;TraesCS2B03G0699900;TraesCS2A03G0133300;TraesCS3D03G0026300;TraesCS5D03G0376900;TraesCS4A03G0793100;TraesCS2B03G0183000;TraesCS3A03G1158600;TraesCS3A03G0654900;TraesCS1B03G0008600;TraesCS2B03G0189900;TraesCS1D03G0990700…
GO:0043412	macromolecule modification	1.323e-48	1.556e-48	7831	364 (4.65%)	TraesCS5B03G0387100;TraesCS6D03G0589900;TraesCS2A03G1079100;TraesCS6A03G0416200;TraesCS3B03G0115900;TraesCS4A03G0805400;TraesCS5A03G0031900;TraesCS5A03G0516700;TraesCS6B03G0081400;TraesCS3D03G0376300;TraesCS2B03G0699900;TraesCS5B03G0524900;TraesCS2A03G0133300;TraesCS3D03G0026300;TraesCS5D03G0376900;TraesCS4A03G0793100;TraesCS2B03G0183000;TraesCS3A03G0222600;TraesCS3A03G1158600;TraesCS3A03G0654900…
GO:0044267	cellular protein metabolic process	1.577e-29	1.854e-29	9710	366 (3.77%)	TraesCS5B03G0387100;TraesCS6D03G0589900;TraesCS2A03G1079100;TraesCS6A03G0416200;TraesCS3B03G0115900;TraesCS4A03G0805400;TraesCS5A03G0031900;TraesCS5A03G0516700;TraesCS6B03G0081400;TraesCS3D03G0376300;TraesCS2B03G0699900;TraesCS5B03G0524900;TraesCS2A03G0133300;TraesCS3D03G0026300;TraesCS5D03G0376900;TraesCS4A03G0793100;TraesCS2B03G0183000;TraesCS3A03G0222600;TraesCS3A03G1158600;TraesCS3A03G0654900…
GO:0019538	protein metabolic process	4.048e-26	4.761e-26	11500	402 (3.5%)	TraesCS5B03G0387100;TraesCS2A03G1079100;TraesCS3B03G0115900;TraesCS5A03G0031900;TraesCS3D03G0376300;TraesCS2A03G0133300;TraesCS7A03G0455600;TraesCS2B03G0183000;TraesCS3A03G0222600;TraesCS3A03G1158600;TraesCS1B03G0008600;TraesCS2B03G0189900;TraesCS3D03G0662300;TraesCS4D03G0488700;TraesCS4D03G0174000;TraesCS5D03G0151600;TraesCS6B03G0777800;TraesCS1B03G0089700;TraesCS2D03G0176500;TraesCS2A03G1090000…
GO:1901564	organonitrogen compound metabolic process	8.601e-26	1.011e-25	14105	467 (3.31%)	TraesCS5B03G0387100;TraesCS2A03G1079100;TraesCS3B03G0115900;TraesCS5A03G0031900;TraesCS3D03G0376300;TraesCS1A03G0502000;TraesCS2A03G0133300;TraesCS7A03G0455600;TraesCS2B03G0183000;TraesCS3A03G0222600;TraesCS3A03G1158600;TraesCS1B03G0008600;TraesCS2B03G0189900;TraesCS3D03G0662300;TraesCS4D03G0488700;TraesCS4D03G0174000;TraesCS6A03G0782800;TraesCS5D03G0151600;TraesCS6B03G0777800;TraesCS1B03G0089700…
GO:0031347	regulation of defense response	6.013e-23	7.067e-23	138	31 (22.46%)	TraesCS3A03G0076900;TraesCS3D03G0067900;TraesCS3B03G0103500;TraesCS4B03G0481100;TraesCS6B03G1030800;TraesCS3B03G0092900;TraesCS5D03G0541400;TraesCS3A03G0086600;TraesCS3D03G0075200;TraesCS3A03G0086900;TraesCS6A03G0861500;TraesCS2B03G0887400;TraesCS4A03G0289200;TraesCS2D03G0741000;TraesCS3D03G0754000;TraesCS1A03G0603400;TraesCS2A03G0801300;TraesCS4A03G0573600;TraesCS6A03G0350400;TraesCS4B03G0228300…
GO:0002831	regulation of response to biotic stimulus	9.508e-23	1.117e-22	118	29 (24.58%)	TraesCS3A03G0076900;TraesCS3D03G0067900;TraesCS3B03G0103500;TraesCS4B03G0481100;TraesCS6B03G1030800;TraesCS3B03G0092900;TraesCS5D03G0541400;TraesCS3A03G0086600;TraesCS3D03G0075200;TraesCS3A03G0086900;TraesCS6A03G0861500;TraesCS2B03G0887400;TraesCS4A03G0289200;TraesCS2D03G0741000;TraesCS3D03G0754000;TraesCS1A03G0603400;TraesCS2A03G0801300;TraesCS4A03G0573600;TraesCS4B03G0228300;TraesCS1A03G0603300…
GO:0032101	regulation of response to external stimulus	3.384e-22	3.976e-22	123	29 (23.58%)	TraesCS3A03G0076900;TraesCS3D03G0067900;TraesCS3B03G0103500;TraesCS4B03G0481100;TraesCS6B03G1030800;TraesCS3B03G0092900;TraesCS5D03G0541400;TraesCS3A03G0086600;TraesCS3D03G0075200;TraesCS3A03G0086900;TraesCS6A03G0861500;TraesCS2B03G0887400;TraesCS4A03G0289200;TraesCS2D03G0741000;TraesCS3D03G0754000;TraesCS1A03G0603400;TraesCS2A03G0801300;TraesCS4A03G0573600;TraesCS4B03G0228300;TraesCS1A03G0603300…
GO:0080134	regulation of response to stress	8.063e-21	9.47e-21	215	35 (16.28%)	TraesCS3A03G0076900;TraesCS3D03G0067900;TraesCS3B03G0103500;TraesCS4B03G0481100;TraesCS6B03G1030800;TraesCS3B03G0092900;TraesCS5D03G0541400;TraesCS3A03G0086600;TraesCS3D03G0075200;TraesCS3A03G0086900;TraesCS6A03G0861500;TraesCS2B03G0887400;TraesCS4A03G0289200;TraesCS2D03G0741000;TraesCS3D03G0754000;TraesCS4A03G0218300;TraesCS1A03G0603400;TraesCS2A03G0801300;TraesCS4A03G0573600;TraesCS4D03G0488700…
GO:0048583	regulation of response to stimulus	3.795e-18	4.456e-18	438	45 (10.27%)	TraesCS3A03G0076900;TraesCS3D03G0067900;TraesCS3B03G0103500;TraesCS2A03G0416100;TraesCS3B03G0858000;TraesCS4B03G0481100;TraesCS6B03G1030800;TraesCS3B03G0092900;TraesCS5D03G0541400;TraesCS3A03G0086600;TraesCS3A03G0830700;TraesCS3D03G0075200;TraesCS3A03G0086900;TraesCS6A03G0861500;TraesCS2B03G0887400;TraesCS3D03G0761900;TraesCS4A03G0289200;TraesCS1D03G1014400;TraesCS2D03G0741000;TraesCS1A03G0655800…
GO:0044260	cellular macromolecule metabolic process	9.35e-16	1.098e-15	12995	398 (3.06%)	TraesCS5B03G0387100;TraesCS2A03G1079100;TraesCS3B03G0115900;TraesCS5A03G0031900;TraesCS3D03G0376300;TraesCS5D03G1211400;TraesCS2A03G0133300;TraesCS2B03G0183000;TraesCS3A03G0222600;TraesCS3A03G1158600;TraesCS3B03G0374100;TraesCS1B03G0008600;TraesCS2B03G0189900;TraesCS4D03G0488700;TraesCS1D03G0881700;TraesCS4D03G0174000;TraesCS5D03G0151600;TraesCS6B03G0777800;TraesCS1B03G0089700;TraesCS2D03G0176500…
GO:0010112	regulation of systemic acquired resistance	1.535e-14	1.802e-14	24	12 (50%)	TraesCS1D03G0572400;TraesCS3A03G0076900;TraesCS3A03G0086600;TraesCS1A03G0603400;TraesCS3D03G0067900;TraesCS3D03G0075200;TraesCS3A03G0086900;TraesCS3B03G0103500;TraesCS1D03G0572300;TraesCS1A03G0603300;TraesCS1B03G0695700;TraesCS3B03G0092900
GO:0009751	response to salicylic acid	4.621e-12	5.422e-12	54	14 (25.93%)	TraesCS4A03G0573600;TraesCS3B03G0858000;TraesCS6A03G0350400;TraesCS4B03G0228300;TraesCS3D03G0691300;TraesCS6B03G1030800;TraesCS3B03G0906100;TraesCS5D03G0541400;TraesCS5A03G0576900;TraesCS3A03G0787100;TraesCS6A03G0861500;TraesCS3A03G0230900;TraesCS4D03G0190300;TraesCS3B03G0287300
GO:0043207	response to external biotic stimulus	5.006e-12	5.872e-12	348	32 (9.2%)	TraesCS3A03G0076900;TraesCS1B03G0708800;TraesCS3B03G0103500;TraesCS3B03G0858000;TraesCS1A03G0268100;TraesCS6D03G0101500;TraesCS6B03G1030800;TraesCS5D03G0541400;TraesCS3D03G0075200;TraesCS6A03G0861500;TraesCS4A03G0218300;TraesCS2B03G0504800;TraesCS1B03G0348200;TraesCS4A03G0573600;TraesCS1B03G1001500;TraesCS2A03G0379000;TraesCS4D03G0488700;TraesCS6A03G0350400;TraesCS4B03G0228300;TraesCS3D03G0691300…
GO:0051707	response to other organism	5.006e-12	5.872e-12	348	32 (9.2%)	TraesCS3A03G0076900;TraesCS1B03G0708800;TraesCS3B03G0103500;TraesCS3B03G0858000;TraesCS1A03G0268100;TraesCS6D03G0101500;TraesCS6B03G1030800;TraesCS5D03G0541400;TraesCS3D03G0075200;TraesCS6A03G0861500;TraesCS4A03G0218300;TraesCS2B03G0504800;TraesCS1B03G0348200;TraesCS4A03G0573600;TraesCS1B03G1001500;TraesCS2A03G0379000;TraesCS4D03G0488700;TraesCS6A03G0350400;TraesCS4B03G0228300;TraesCS3D03G0691300…
GO:0014070	response to organic cyclic compound	6.011e-12	7.049e-12	117	19 (16.24%)	TraesCS2A03G0801300;TraesCS4A03G0573600;TraesCS3B03G0858000;TraesCS6A03G0350400;TraesCS4B03G0228300;TraesCS3D03G0691300;TraesCS6B03G1030800;TraesCS3B03G0906100;TraesCS5D03G0541400;TraesCS5A03G0576900;TraesCS3A03G0787100;TraesCS3A03G0309300;TraesCS6A03G0861500;TraesCS2B03G0887400;TraesCS3A03G0230900;TraesCS4D03G0190300;TraesCS3B03G0374100;TraesCS2D03G0741000;TraesCS3B03G0287300
GO:1900424	regulation of defense response to bacterium	4.4e-11	5.158e-11	13	8 (61.54%)	TraesCS3A03G0076900;TraesCS5A03G0576900;TraesCS3D03G0075200;TraesCS4A03G0573600;TraesCS3B03G0103500;TraesCS4B03G0228300;TraesCS4D03G0190300;TraesCS5D03G0541400
GO:0009625	response to insect	6.222e-11	7.293e-11	9	7 (77.78%)	TraesCS3A03G0787100;TraesCS4A03G0573600;TraesCS6A03G0861500;TraesCS4B03G0228300;TraesCS4D03G0190300;TraesCS6B03G1030800;TraesCS3B03G0906100
GO:2000068	regulation of defense response to insect	6.222e-11	7.293e-11	9	7 (77.78%)	TraesCS3A03G0787100;TraesCS4A03G0573600;TraesCS6A03G0861500;TraesCS4B03G0228300;TraesCS4D03G0190300;TraesCS6B03G1030800;TraesCS3B03G0906100
GO:0009617	response to bacterium	2.148e-10	2.517e-10	177	21 (11.86%)	TraesCS3A03G0076900;TraesCS4A03G0573600;TraesCS3B03G0103500;TraesCS1B03G1001500;TraesCS3B03G0858000;TraesCS4D03G0488700;TraesCS6A03G0350400;TraesCS4B03G0228300;TraesCS6D03G0101500;TraesCS3D03G0691300;TraesCS6B03G1030800;TraesCS5D03G0541400;TraesCS5A03G0576900;TraesCS3D03G0075200;TraesCS2D03G0421300;TraesCS6A03G0861500;TraesCS4D03G0190300;TraesCS7D03G0183900;TraesCS3B03G0860600;TraesCS4A03G0218300…
GO:0006807	nitrogen compound metabolic process	3.319e-10	3.889e-10	18195	490 (2.69%)	TraesCS5B03G0387100;TraesCS2A03G1079100;TraesCS3B03G0115900;TraesCS5A03G0031900;TraesCS3D03G0376300;TraesCS5D03G1211400;TraesCS1A03G0502000;TraesCS2A03G0133300;TraesCS7A03G0455600;TraesCS2B03G0183000;TraesCS3A03G0222600;TraesCS3A03G1158600;TraesCS3B03G0374100;TraesCS1B03G0008600;TraesCS2B03G0189900;TraesCS3D03G0662300;TraesCS4D03G0488700;TraesCS1D03G0881700;TraesCS4D03G0174000;TraesCS6A03G0782800…
GO:0010337	regulation of salicylic acid metabolic process	4.159e-10	4.871e-10	16	8 (50%)	TraesCS3A03G0076900;TraesCS3A03G0787100;TraesCS3D03G0075200;TraesCS4A03G0573600;TraesCS3B03G0103500;TraesCS4B03G0228300;TraesCS4D03G0190300;TraesCS3B03G0906100
GO:0002833	positive regulation of response to biotic stimulus	8.08e-10	9.461e-10	42	11 (26.19%)	TraesCS3A03G0076900;TraesCS2A03G0801300;TraesCS3D03G0075200;TraesCS4A03G0573600;TraesCS3B03G0103500;TraesCS6A03G0861500;TraesCS2B03G0887400;TraesCS4B03G0228300;TraesCS4D03G0190300;TraesCS6B03G1030800;TraesCS2D03G0741000
GO:0009607	response to biotic stimulus	9.417e-10	1.102e-09	427	32 (7.49%)	TraesCS3A03G0076900;TraesCS1B03G0708800;TraesCS3B03G0103500;TraesCS3B03G0858000;TraesCS1A03G0268100;TraesCS6D03G0101500;TraesCS6B03G1030800;TraesCS5D03G0541400;TraesCS3D03G0075200;TraesCS6A03G0861500;TraesCS4A03G0218300;TraesCS2B03G0504800;TraesCS1B03G0348200;TraesCS4A03G0573600;TraesCS1B03G1001500;TraesCS2A03G0379000;TraesCS4D03G0488700;TraesCS6A03G0350400;TraesCS4B03G0228300;TraesCS3D03G0691300…
GO:0031349	positive regulation of defense response	1.065e-09	1.246e-09	43	11 (25.58%)	TraesCS3A03G0076900;TraesCS2A03G0801300;TraesCS3D03G0075200;TraesCS4A03G0573600;TraesCS3B03G0103500;TraesCS6A03G0861500;TraesCS2B03G0887400;TraesCS4B03G0228300;TraesCS4D03G0190300;TraesCS6B03G1030800;TraesCS2D03G0741000
GO:0010200	response to chitin	1.295e-09	1.515e-09	12	7 (58.33%)	TraesCS5A03G0576900;TraesCS7B03G0802400;TraesCS4D03G0488700;TraesCS6A03G0350400;TraesCS4A03G0218300;TraesCS4B03G0554300;TraesCS5D03G0541400
GO:0030001	metal ion transport	2.416e-09	2.826e-09	729	43 (5.9%)	TraesCS4D03G0305700;TraesCS7D03G1218400;TraesCS2D03G0432100;TraesCS5A03G0919100;TraesCS1A03G0268100;TraesCS1D03G0351700;TraesCS2D03G0667000;TraesCS2D03G1200500;TraesCS7A03G1017300;TraesCS2D03G1200300;TraesCS2A03G1245100;TraesCS2D03G1200600;TraesCS4B03G0689300;TraesCS2B03G0699900;TraesCS3A03G1035900;TraesCS6A03G0229000;TraesCS2A03G1244900;TraesCS2B03G1425700;TraesCS7B03G0858100;TraesCS2B03G1425800…
GO:0009862	systemic acquired resistance, salicylic acid mediated signaling pathway	2.755e-09	3.222e-09	13	7 (53.85%)	TraesCS4A03G0573600;TraesCS3B03G0858000;TraesCS3A03G0230900;TraesCS4B03G0228300;TraesCS3D03G0691300;TraesCS4D03G0190300;TraesCS3B03G0287300
GO:0032103	positive regulation of response to external stimulus	2.986e-09	3.491e-09	47	11 (23.4%)	TraesCS3A03G0076900;TraesCS2A03G0801300;TraesCS3D03G0075200;TraesCS4A03G0573600;TraesCS3B03G0103500;TraesCS6A03G0861500;TraesCS2B03G0887400;TraesCS4B03G0228300;TraesCS4D03G0190300;TraesCS6B03G1030800;TraesCS2D03G0741000
GO:0071407	cellular response to organic cyclic compound	3.224e-09	3.769e-09	59	12 (20.34%)	TraesCS2A03G0801300;TraesCS3A03G0309300;TraesCS4A03G0573600;TraesCS3B03G0858000;TraesCS2B03G0887400;TraesCS3A03G0230900;TraesCS4B03G0228300;TraesCS3D03G0691300;TraesCS4D03G0190300;TraesCS3B03G0374100;TraesCS2D03G0741000;TraesCS3B03G0287300
GO:0009863	salicylic acid mediated signaling pathway	5.409e-09	6.321e-09	14	7 (50%)	TraesCS4A03G0573600;TraesCS3B03G0858000;TraesCS3A03G0230900;TraesCS4B03G0228300;TraesCS3D03G0691300;TraesCS4D03G0190300;TraesCS3B03G0287300
GO:2000022	regulation of jasmonic acid mediated signaling pathway	5.988e-09	6.996e-09	21	8 (38.1%)	TraesCS2D03G0662000;TraesCS4A03G0573600;TraesCS3B03G0858000;TraesCS3A03G0230900;TraesCS4B03G0228300;TraesCS3D03G0691300;TraesCS4D03G0190300;TraesCS3B03G0287300
GO:0043170	macromolecule metabolic process	6.034e-09	7.049e-09	16199	436 (2.69%)	TraesCS5B03G0387100;TraesCS2A03G1079100;TraesCS3B03G0115900;TraesCS5A03G0031900;TraesCS3D03G0376300;TraesCS5D03G1211400;TraesCS2A03G0133300;TraesCS7A03G0455600;TraesCS2B03G0183000;TraesCS3A03G0222600;TraesCS3A03G1158600;TraesCS3B03G0374100;TraesCS1B03G0008600;TraesCS2B03G0189900;TraesCS3D03G0662300;TraesCS4D03G0488700;TraesCS1D03G0881700;TraesCS4D03G0174000;TraesCS5D03G0151600;TraesCS6B03G0777800…
GO:2000031	regulation of salicylic acid mediated signaling pathway	9.956e-09	1.163e-08	15	7 (46.67%)	TraesCS4A03G0573600;TraesCS3B03G0858000;TraesCS3A03G0230900;TraesCS4B03G0228300;TraesCS3D03G0691300;TraesCS4D03G0190300;TraesCS3B03G0287300
GO:0009605	response to external stimulus	1.301e-08	1.518e-08	580	36 (6.21%)	TraesCS3A03G0076900;TraesCS1B03G0708800;TraesCS3B03G0103500;TraesCS3B03G0858000;TraesCS1A03G0268100;TraesCS6D03G0101500;TraesCS6B03G1030800;TraesCS5D03G0541400;TraesCS2B03G0699900;TraesCS2B03G1042000;TraesCS3D03G0075200;TraesCS6A03G0861500;TraesCS2A03G0941300;TraesCS4A03G0218300;TraesCS2B03G0504800;TraesCS1B03G0348200;TraesCS4A03G0573600;TraesCS1B03G1001500;TraesCS2A03G0379000;TraesCS4D03G0488700…
GO:0080142	regulation of salicylic acid biosynthetic process	1.672e-08	1.952e-08	10	6 (60%)	TraesCS3A03G0076900;TraesCS3D03G0075200;TraesCS4A03G0573600;TraesCS3B03G0103500;TraesCS4B03G0228300;TraesCS4D03G0190300
GO:0048584	positive regulation of response to stimulus	1.795e-08	2.094e-08	148	17 (11.49%)	TraesCS3A03G0076900;TraesCS2A03G0801300;TraesCS4A03G0573600;TraesCS3B03G0103500;TraesCS4D03G0488700;TraesCS4B03G0228300;TraesCS6B03G1030800;TraesCS3D03G0075200;TraesCS6A03G0861500;TraesCS2B03G0887400;TraesCS3A03G0894700;TraesCS4D03G0190300;TraesCS1D03G1014400;TraesCS2D03G0741000;TraesCS1A03G0655800;TraesCS4A03G0218300;TraesCS4B03G0554300
GO:1900367	positive regulation of defense response to insect	2.408e-08	2.809e-08	6	5 (83.33%)	TraesCS4A03G0573600;TraesCS6A03G0861500;TraesCS4B03G0228300;TraesCS4D03G0190300;TraesCS6B03G1030800
GO:0071446	cellular response to salicylic acid stimulus	2.9e-08	3.382e-08	17	7 (41.18%)	TraesCS4A03G0573600;TraesCS3B03G0858000;TraesCS3A03G0230900;TraesCS4B03G0228300;TraesCS3D03G0691300;TraesCS4D03G0190300;TraesCS3B03G0287300
GO:1900426	positive regulation of defense response to bacterium	3.613e-08	4.213e-08	11	6 (54.55%)	TraesCS3A03G0076900;TraesCS3D03G0075200;TraesCS4A03G0573600;TraesCS3B03G0103500;TraesCS4B03G0228300;TraesCS4D03G0190300
GO:0042742	defense response to bacterium	4.769e-08	5.56e-08	158	17 (10.76%)	TraesCS3A03G0076900;TraesCS4A03G0573600;TraesCS3B03G0103500;TraesCS1B03G1001500;TraesCS3B03G0858000;TraesCS4D03G0488700;TraesCS4B03G0228300;TraesCS3D03G0691300;TraesCS6B03G1030800;TraesCS3D03G0075200;TraesCS2D03G0421300;TraesCS6A03G0861500;TraesCS4D03G0190300;TraesCS7D03G0183900;TraesCS3B03G0860600;TraesCS4A03G0218300;TraesCS4B03G0554300
GO:0098542	defense response to other organism	5.793e-08	6.752e-08	309	24 (7.77%)	TraesCS2B03G0504800;TraesCS3A03G0076900;TraesCS4A03G0573600;TraesCS3B03G0103500;TraesCS1B03G1001500;TraesCS2A03G0379000;TraesCS3B03G0858000;TraesCS4D03G0488700;TraesCS6A03G0350400;TraesCS4B03G0228300;TraesCS3D03G0691300;TraesCS6B03G1030800;TraesCS5D03G0913400;TraesCS3D03G0075200;TraesCS2D03G0421300;TraesCS6A03G0861500;TraesCS3A03G0230900;TraesCS3B03G1121500;TraesCS4D03G0190300;TraesCS7D03G0183900…
GO:0044238	primary metabolic process	1.321e-07	1.539e-07	21331	542 (2.54%)	TraesCS5B03G0387100;TraesCS2A03G1079100;TraesCS3B03G0115900;TraesCS5A03G0031900;TraesCS7B03G0401300;TraesCS2A03G1085900;TraesCS3D03G0376300;TraesCS5D03G1211400;TraesCS2A03G0133300;TraesCS7A03G0455600;TraesCS2B03G0183000;TraesCS3A03G0222600;TraesCS3A03G1158600;TraesCS3B03G0374100;TraesCS1B03G0008600;TraesCS2B03G0189900;TraesCS3D03G0662300;TraesCS4A03G0573600;TraesCS4D03G0488700;TraesCS1D03G0881700…
GO:1901698	response to nitrogen compound	2.614e-07	3.045e-07	86	12 (13.95%)	TraesCS2B03G1042000;TraesCS5A03G0576900;TraesCS7B03G0802400;TraesCS6A03G0578400;TraesCS6A03G0861500;TraesCS4D03G0488700;TraesCS6A03G0350400;TraesCS2A03G0941300;TraesCS6B03G1030800;TraesCS4A03G0218300;TraesCS4B03G0554300;TraesCS5D03G0541400
GO:0071704	organic substance metabolic process	6.482e-07	7.55e-07	22718	567 (2.5%)	TraesCS5B03G0387100;TraesCS2A03G1079100;TraesCS3B03G0115900;TraesCS5A03G0031900;TraesCS7B03G0401300;TraesCS2A03G1085900;TraesCS3D03G0376300;TraesCS5D03G1211400;TraesCS1A03G0502000;TraesCS2A03G0133300;TraesCS7A03G0455600;TraesCS2B03G0183000;TraesCS3A03G0222600;TraesCS3A03G1158600;TraesCS3B03G0374100;TraesCS1B03G0008600;TraesCS2B03G0189900;TraesCS3D03G0662300;TraesCS4A03G0573600;TraesCS4D03G0488700…
GO:0007584	response to nutrient	9.573e-07	1.115e-06	5	4 (80%)	TraesCS2B03G0699900;TraesCS2A03G0606900;TraesCS6A03G0861500;TraesCS6B03G1030800
GO:1900150	regulation of defense response to fungus	1.587e-06	1.847e-06	40	8 (20%)	TraesCS2A03G0801300;TraesCS2B03G0887400;TraesCS4A03G0289200;TraesCS4B03G0481100;TraesCS3A03G0818000;TraesCS2D03G0741000;TraesCS3D03G0535800;TraesCS3D03G0754000
GO:0010565	regulation of cellular ketone metabolic process	1.587e-06	1.847e-06	40	8 (20%)	TraesCS3A03G0076900;TraesCS3A03G0787100;TraesCS3D03G0075200;TraesCS4A03G0573600;TraesCS3B03G0103500;TraesCS4B03G0228300;TraesCS4D03G0190300;TraesCS3B03G0906100
GO:1901700	response to oxygen-containing compound	2.901e-06	3.376e-06	819	39 (4.76%)	TraesCS7B03G0802400;TraesCS2A03G0416100;TraesCS3B03G0858000;TraesCS6D03G0101500;TraesCS3D03G0225500;TraesCS6B03G1030800;TraesCS5A03G1074600;TraesCS5D03G0541400;TraesCS2B03G0699900;TraesCS3A03G0830700;TraesCS5B03G1137700;TraesCS6A03G0578400;TraesCS6A03G0861500;TraesCS2B03G0887400;TraesCS3D03G0761900;TraesCS3B03G0374100;TraesCS2D03G0741000;TraesCS3B03G0951200;TraesCS4A03G0218300;TraesCS2A03G0801300…
GO:0009620	response to fungus	3.1e-06	3.607e-06	127	13 (10.24%)	TraesCS1B03G0708800;TraesCS1B03G1001500;TraesCS3B03G0858000;TraesCS4D03G0488700;TraesCS6A03G0350400;TraesCS3D03G0691300;TraesCS6B03G1030800;TraesCS5D03G0913400;TraesCS5D03G0541400;TraesCS5A03G0576900;TraesCS6A03G0861500;TraesCS4A03G0218300;TraesCS4B03G0554300
GO:0023051	regulation of signaling	3.642e-06	4.237e-06	192	16 (8.33%)	TraesCS4A03G0573600;TraesCS2A03G0416100;TraesCS3B03G0858000;TraesCS6A03G0350400;TraesCS4B03G0228300;TraesCS3D03G0691300;TraesCS2D03G0662000;TraesCS3A03G0830700;TraesCS3D03G0761900;TraesCS3A03G0230900;TraesCS3A03G0894700;TraesCS4D03G0190300;TraesCS1D03G1014400;TraesCS1A03G0655800;TraesCS3B03G0287300;TraesCS3B03G0951200
GO:0009966	regulation of signal transduction	3.642e-06	4.237e-06	192	16 (8.33%)	TraesCS4A03G0573600;TraesCS2A03G0416100;TraesCS3B03G0858000;TraesCS6A03G0350400;TraesCS4B03G0228300;TraesCS3D03G0691300;TraesCS2D03G0662000;TraesCS3A03G0830700;TraesCS3D03G0761900;TraesCS3A03G0230900;TraesCS3A03G0894700;TraesCS4D03G0190300;TraesCS1D03G1014400;TraesCS1A03G0655800;TraesCS3B03G0287300;TraesCS3B03G0951200
GO:0010243	response to organonitrogen compound	4.428e-06	5.15e-06	60	9 (15%)	TraesCS5A03G0576900;TraesCS7B03G0802400;TraesCS6A03G0861500;TraesCS4D03G0488700;TraesCS6A03G0350400;TraesCS6B03G1030800;TraesCS4A03G0218300;TraesCS4B03G0554300;TraesCS5D03G0541400
GO:0120254	olefinic compound metabolic process	4.816e-06	5.599e-06	46	8 (17.39%)	TraesCS1B03G0108400;TraesCS2D03G0459600;TraesCS6D03G0607800;TraesCS1B03G0334900;TraesCS6A03G0725000;TraesCS6B03G0858400;TraesCS2B03G0540200;TraesCS5B03G1146900
GO:0010646	regulation of cell communication	5.068e-06	5.891e-06	197	16 (8.12%)	TraesCS4A03G0573600;TraesCS2A03G0416100;TraesCS3B03G0858000;TraesCS6A03G0350400;TraesCS4B03G0228300;TraesCS3D03G0691300;TraesCS2D03G0662000;TraesCS3A03G0830700;TraesCS3D03G0761900;TraesCS3A03G0230900;TraesCS3A03G0894700;TraesCS4D03G0190300;TraesCS1D03G1014400;TraesCS1A03G0655800;TraesCS3B03G0287300;TraesCS3B03G0951200
GO:0009411	response to UV	5.852e-06	6.801e-06	62	9 (14.52%)	TraesCS3A03G0076900;TraesCS3D03G0075200;TraesCS4A03G0573600;TraesCS3B03G0103500;TraesCS4D03G0488700;TraesCS4B03G0228300;TraesCS4D03G0190300;TraesCS4A03G0218300;TraesCS4B03G0554300
GO:0044706	multi-multicellular organism process	6.755e-06	7.848e-06	516	28 (5.43%)	TraesCS6A03G0005200;TraesCS2D03G1127500;TraesCS2A03G1175800;TraesCS3A03G0160300;TraesCS3B03G0201700;TraesCS4A03G0874000;TraesCS5A03G0388500;TraesCS5B03G1264800;TraesCS4B03G0129600;TraesCS4A03G0669100;TraesCS2A03G1242300;TraesCS5D03G0376900;TraesCS2D03G0095200;TraesCS3D03G0142600;TraesCS4A03G0218300;TraesCS7B03G0960400;TraesCS1B03G0755500;TraesCS4D03G0488700;TraesCS3D03G0717600;TraesCS1D03G0782600…
GO:0009856	pollination	6.755e-06	7.848e-06	516	28 (5.43%)	TraesCS6A03G0005200;TraesCS2D03G1127500;TraesCS2A03G1175800;TraesCS3A03G0160300;TraesCS3B03G0201700;TraesCS4A03G0874000;TraesCS5A03G0388500;TraesCS5B03G1264800;TraesCS4B03G0129600;TraesCS4A03G0669100;TraesCS2A03G1242300;TraesCS5D03G0376900;TraesCS2D03G0095200;TraesCS3D03G0142600;TraesCS4A03G0218300;TraesCS7B03G0960400;TraesCS1B03G0755500;TraesCS4D03G0488700;TraesCS3D03G0717600;TraesCS1D03G0782600…
GO:1901701	cellular response to oxygen-containing compound	6.867e-06	7.976e-06	249	18 (7.23%)	TraesCS2A03G0801300;TraesCS4A03G0573600;TraesCS2A03G0416100;TraesCS3B03G0858000;TraesCS4B03G0228300;TraesCS3D03G0691300;TraesCS3D03G0225500;TraesCS6B03G1030800;TraesCS4A03G0238700;TraesCS3A03G0309300;TraesCS3A03G0234800;TraesCS6A03G0861500;TraesCS2B03G0887400;TraesCS3A03G0230900;TraesCS4D03G0190300;TraesCS3B03G0374100;TraesCS2D03G0741000;TraesCS3B03G0287300
GO:0010310	regulation of hydrogen peroxide metabolic process	6.98e-06	8.105e-06	14	5 (35.71%)	TraesCS3A03G0787100;TraesCS4A03G0573600;TraesCS4B03G0228300;TraesCS4D03G0190300;TraesCS3B03G0906100
GO:0010262	somatic embryogenesis	9.279e-06	1.077e-05	3	3 (100%)	TraesCS2A03G0801300;TraesCS2B03G0887400;TraesCS2D03G0741000
GO:0045041	protein import into mitochondrial intermembrane space	9.279e-06	1.077e-05	3	3 (100%)	TraesCS2D03G0849600;TraesCS2B03G0999600;TraesCS2A03G0909900
GO:0010618	aerenchyma formation	9.279e-06	1.077e-05	3	3 (100%)	TraesCS4A03G0573600;TraesCS4B03G0228300;TraesCS4D03G0190300
GO:0050829	defense response to Gram-negative bacterium	9.279e-06	1.077e-05	3	3 (100%)	TraesCS4A03G0573600;TraesCS4B03G0228300;TraesCS4D03G0190300
GO:0060866	leaf abscission	9.279e-06	1.077e-05	3	3 (100%)	TraesCS4A03G0573600;TraesCS4B03G0228300;TraesCS4D03G0190300
GO:0071327	cellular response to trehalose stimulus	9.279e-06	1.077e-05	3	3 (100%)	TraesCS4A03G0573600;TraesCS4B03G0228300;TraesCS4D03G0190300
GO:0080151	positive regulation of salicylic acid mediated signaling pathway	9.279e-06	1.077e-05	3	3 (100%)	TraesCS4A03G0573600;TraesCS4B03G0228300;TraesCS4D03G0190300
GO:0052318	regulation of phytoalexin metabolic process	9.279e-06	1.077e-05	3	3 (100%)	TraesCS4A03G0573600;TraesCS4B03G0228300;TraesCS4D03G0190300
GO:0052319	regulation of phytoalexin biosynthetic process	9.279e-06	1.077e-05	3	3 (100%)	TraesCS4A03G0573600;TraesCS4B03G0228300;TraesCS4D03G0190300
GO:0052320	positive regulation of phytoalexin metabolic process	9.279e-06	1.077e-05	3	3 (100%)	TraesCS4A03G0573600;TraesCS4B03G0228300;TraesCS4D03G0190300
GO:1900378	positive regulation of secondary metabolite biosynthetic process	9.279e-06	1.077e-05	3	3 (100%)	TraesCS4A03G0573600;TraesCS4B03G0228300;TraesCS4D03G0190300
GO:0052322	positive regulation of phytoalexin biosynthetic process	9.279e-06	1.077e-05	3	3 (100%)	TraesCS4A03G0573600;TraesCS4B03G0228300;TraesCS4D03G0190300
GO:1901182	regulation of camalexin biosynthetic process	9.279e-06	1.077e-05	3	3 (100%)	TraesCS4A03G0573600;TraesCS4B03G0228300;TraesCS4D03G0190300
GO:1901183	positive regulation of camalexin biosynthetic process	9.279e-06	1.077e-05	3	3 (100%)	TraesCS4A03G0573600;TraesCS4B03G0228300;TraesCS4D03G0190300
GO:0008037	cell recognition	9.861e-06	1.145e-05	441	25 (5.67%)	TraesCS6A03G0005200;TraesCS2D03G1127500;TraesCS2A03G1175800;TraesCS3A03G0160300;TraesCS3B03G0201700;TraesCS4A03G0874000;TraesCS5A03G0388500;TraesCS5B03G1264800;TraesCS4B03G0129600;TraesCS4A03G0669100;TraesCS2A03G1242300;TraesCS5D03G0376900;TraesCS2D03G0095200;TraesCS3D03G0142600;TraesCS7B03G0960400;TraesCS1B03G0755500;TraesCS3D03G0717600;TraesCS1D03G0782600;TraesCS2A03G1137500;TraesCS2B03G0753800…
GO:0048544	recognition of pollen	9.861e-06	1.145e-05	441	25 (5.67%)	TraesCS6A03G0005200;TraesCS2D03G1127500;TraesCS2A03G1175800;TraesCS3A03G0160300;TraesCS3B03G0201700;TraesCS4A03G0874000;TraesCS5A03G0388500;TraesCS5B03G1264800;TraesCS4B03G0129600;TraesCS4A03G0669100;TraesCS2A03G1242300;TraesCS5D03G0376900;TraesCS2D03G0095200;TraesCS3D03G0142600;TraesCS7B03G0960400;TraesCS1B03G0755500;TraesCS3D03G0717600;TraesCS1D03G0782600;TraesCS2A03G1137500;TraesCS2B03G0753800…
GO:0007154	cell communication	1.102e-05	1.279e-05	1826	67 (3.67%)	TraesCS7A03G0425500;TraesCS6A03G0005200;TraesCS2A03G0416100;TraesCS3B03G0858000;TraesCS2D03G1127500;TraesCS5D03G0541100;TraesCS3A03G0160300;TraesCS3D03G0225500;TraesCS3B03G0201700;TraesCS5A03G0388500;TraesCS2B03G0699900;TraesCS4A03G0669100;TraesCS2A03G1242300;TraesCS5D03G0376900;TraesCS2A03G0941300;TraesCS2D03G0095200;TraesCS3B03G0374100;TraesCS2D03G0741000;TraesCS1B03G0008600;TraesCS2A03G0801300…
GO:0010033	response to organic substance	1.234e-05	1.432e-05	1169	48 (4.11%)	TraesCS4D03G0024100;TraesCS3A03G0076900;TraesCS4D03G0024200;TraesCS7B03G0802400;TraesCS3B03G0103500;TraesCS2A03G0416100;TraesCS3B03G0858000;TraesCS6D03G0101500;TraesCS3D03G0225500;TraesCS6B03G1030800;TraesCS5A03G1074600;TraesCS5D03G0541400;TraesCS4A03G0751100;TraesCS3A03G0830700;TraesCS4A03G0751400;TraesCS5B03G1137700;TraesCS3D03G0075200;TraesCS6A03G0861500;TraesCS2B03G0887400;TraesCS3D03G0761900…
GO:0009875	pollen-pistil interaction	1.335e-05	1.549e-05	449	25 (5.57%)	TraesCS6A03G0005200;TraesCS2D03G1127500;TraesCS2A03G1175800;TraesCS3A03G0160300;TraesCS3B03G0201700;TraesCS4A03G0874000;TraesCS5A03G0388500;TraesCS5B03G1264800;TraesCS4B03G0129600;TraesCS4A03G0669100;TraesCS2A03G1242300;TraesCS5D03G0376900;TraesCS2D03G0095200;TraesCS3D03G0142600;TraesCS7B03G0960400;TraesCS1B03G0755500;TraesCS3D03G0717600;TraesCS1D03G0782600;TraesCS2A03G1137500;TraesCS2B03G0753800…
GO:0006810	transport	1.825e-05	2.116e-05	5601	163 (2.91%)	TraesCS4D03G0590400;TraesCS2A03G0638900;TraesCS5D03G0551100;TraesCS7D03G1218400;TraesCS4D03G0594600;TraesCS2A03G0907100;TraesCS2D03G0849600;TraesCS1A03G0268100;TraesCS1D03G0351700;TraesCS2D03G1200500;TraesCS3A03G0649300;TraesCS1A03G0530700;TraesCS2A03G1245100;TraesCS4D03G0626400;TraesCS2B03G0699900;TraesCS7B03G0399300;TraesCS7B03G0858100;TraesCS2B03G1425800;TraesCS5A03G0078600;TraesCS3B03G1191300…
GO:0050789	regulation of biological process	1.873e-05	2.172e-05	7510	209 (2.78%)	TraesCS6A03G0951400;TraesCS7A03G0425500;TraesCS5A03G0669400;TraesCS5B03G0393900;TraesCS4B03G0489100;TraesCS4B03G0712900;TraesCS6B03G0822000;TraesCS1D03G0507600;TraesCS2B03G0699900;TraesCS3A03G0830700;TraesCS4A03G0289200;TraesCS3B03G0374100;TraesCS1D03G0166900;TraesCS1B03G0008600;TraesCS3A03G0392300;TraesCS6A03G0784300;TraesCS2D03G0353500;TraesCS4A03G0573600;TraesCS6A03G0656800;TraesCS4D03G0488700…
GO:0010648	negative regulation of cell communication	1.901e-05	2.203e-05	55	8 (14.55%)	TraesCS3A03G0830700;TraesCS4A03G0573600;TraesCS2A03G0416100;TraesCS3D03G0761900;TraesCS6A03G0350400;TraesCS4B03G0228300;TraesCS4D03G0190300;TraesCS3B03G0951200
GO:0023057	negative regulation of signaling	1.901e-05	2.203e-05	55	8 (14.55%)	TraesCS3A03G0830700;TraesCS4A03G0573600;TraesCS2A03G0416100;TraesCS3D03G0761900;TraesCS6A03G0350400;TraesCS4B03G0228300;TraesCS4D03G0190300;TraesCS3B03G0951200
GO:0009968	negative regulation of signal transduction	1.901e-05	2.203e-05	55	8 (14.55%)	TraesCS3A03G0830700;TraesCS4A03G0573600;TraesCS2A03G0416100;TraesCS3D03G0761900;TraesCS6A03G0350400;TraesCS4B03G0228300;TraesCS4D03G0190300;TraesCS3B03G0951200
GO:0006812	cation transport	1.97e-05	2.283e-05	1225	49 (4%)	TraesCS7D03G1218400;TraesCS2D03G0432100;TraesCS1A03G0268100;TraesCS1D03G0351700;TraesCS2D03G1200500;TraesCS7A03G1017300;TraesCS2D03G1200300;TraesCS2A03G1245100;TraesCS2B03G0699900;TraesCS3A03G1035900;TraesCS2B03G1146000;TraesCS7B03G0858100;TraesCS2B03G1425800;TraesCS5A03G0078600;TraesCS3B03G1191300;TraesCS1B03G0348200;TraesCS2B03G0172800;TraesCS2A03G0415000;TraesCS1B03G0453200;TraesCS1D03G0703400…
GO:0009838	abscission	2.255e-05	2.612e-05	9	4 (44.44%)	TraesCS4A03G0573600;TraesCS4B03G0228300;TraesCS2B03G0820700;TraesCS4D03G0190300
GO:0009938	negative regulation of gibberellic acid mediated signaling pathway	2.255e-05	2.612e-05	9	4 (44.44%)	TraesCS3A03G0830700;TraesCS3D03G0761900;TraesCS6A03G0350400;TraesCS3B03G0951200
GO:0062012	regulation of small molecule metabolic process	2.486e-05	2.879e-05	57	8 (14.04%)	TraesCS3A03G0076900;TraesCS3A03G0787100;TraesCS3D03G0075200;TraesCS4A03G0573600;TraesCS3B03G0103500;TraesCS4B03G0228300;TraesCS4D03G0190300;TraesCS3B03G0906100
GO:0051234	establishment of localization	2.499e-05	2.894e-05	5635	163 (2.89%)	TraesCS4D03G0590400;TraesCS2A03G0638900;TraesCS5D03G0551100;TraesCS7D03G1218400;TraesCS4D03G0594600;TraesCS2A03G0907100;TraesCS2D03G0849600;TraesCS1A03G0268100;TraesCS1D03G0351700;TraesCS2D03G1200500;TraesCS3A03G0649300;TraesCS1A03G0530700;TraesCS2A03G1245100;TraesCS4D03G0626400;TraesCS2B03G0699900;TraesCS7B03G0399300;TraesCS7B03G0858100;TraesCS2B03G1425800;TraesCS5A03G0078600;TraesCS3B03G1191300…
GO:0009627	systemic acquired resistance	3.215e-05	3.721e-05	59	8 (13.56%)	TraesCS4A03G0573600;TraesCS3B03G0858000;TraesCS3A03G0230900;TraesCS4B03G0228300;TraesCS3B03G1121500;TraesCS3D03G0691300;TraesCS4D03G0190300;TraesCS3B03G0287300
GO:0051176	positive regulation of sulfur metabolic process	3.653e-05	4.228e-05	4	3 (75%)	TraesCS4A03G0573600;TraesCS4B03G0228300;TraesCS4D03G0190300
GO:0044237	cellular metabolic process	3.888e-05	4.498e-05	20463	501 (2.45%)	TraesCS5B03G0387100;TraesCS2A03G1079100;TraesCS3B03G0115900;TraesCS5A03G0031900;TraesCS3D03G0376300;TraesCS5D03G1211400;TraesCS1A03G0502000;TraesCS2A03G0133300;TraesCS2B03G0183000;TraesCS3A03G0222600;TraesCS3A03G1158600;TraesCS3B03G0374100;TraesCS7A03G0786400;TraesCS1B03G0008600;TraesCS2B03G0189900;TraesCS4D03G0488700;TraesCS1D03G0881700;TraesCS4D03G0174000;TraesCS6A03G0782800;TraesCS5D03G0151600…
GO:0009753	response to jasmonic acid	4.114e-05	4.758e-05	61	8 (13.11%)	TraesCS3A03G0787100;TraesCS3A03G0234800;TraesCS6A03G0861500;TraesCS6A03G0350400;TraesCS3D03G0225500;TraesCS6B03G1030800;TraesCS5D03G0913400;TraesCS3B03G0906100
GO:0070542	response to fatty acid	4.636e-05	5.362e-05	62	8 (12.9%)	TraesCS3A03G0787100;TraesCS3A03G0234800;TraesCS6A03G0861500;TraesCS6A03G0350400;TraesCS3D03G0225500;TraesCS6B03G1030800;TraesCS5D03G0913400;TraesCS3B03G0906100
GO:0071577	zinc ion transmembrane transport	4.687e-05	5.419e-05	46	7 (15.22%)	TraesCS1B03G0348200;TraesCS7B03G0858100;TraesCS5A03G0919100;TraesCS1A03G0268100;TraesCS7A03G1017300;TraesCS2A03G1176600;TraesCS2B03G1338500
GO:0033993	response to lipid	4.946e-05	5.717e-05	399	22 (5.51%)	TraesCS2A03G0801300;TraesCS2A03G0416100;TraesCS3B03G0207200;TraesCS6A03G0350400;TraesCS6D03G0101500;TraesCS3D03G0225500;TraesCS6B03G1030800;TraesCS5D03G0913400;TraesCS3B03G0906100;TraesCS5A03G1074600;TraesCS3A03G0787100;TraesCS3A03G0830700;TraesCS4A03G0238700;TraesCS5B03G1137700;TraesCS3A03G0309300;TraesCS3A03G0234800;TraesCS6A03G0861500;TraesCS2B03G0887400;TraesCS3D03G0761900;TraesCS3B03G0374100…
GO:0006355	regulation of transcription, DNA-templated	5.076e-05	5.866e-05	4287	128 (2.99%)	TraesCS6A03G0951400;TraesCS5A03G0669400;TraesCS5B03G0393900;TraesCS1A03G0696200;TraesCS4D03G0435100;TraesCS3B03G0484700;TraesCS4B03G0489100;TraesCS4B03G0712900;TraesCS6B03G0822000;TraesCS2A03G1019200;TraesCS3A03G0830700;TraesCS3D03G0761900;TraesCS4A03G0078800;TraesCS2A03G0999000;TraesCS3A03G0822800;TraesCS4A03G0124800;TraesCS1D03G0166900;TraesCS3A03G0392300;TraesCS5D03G0873200;TraesCS2D03G0353500…
GO:2001141	regulation of RNA biosynthetic process	5.232e-05	6.044e-05	4290	128 (2.98%)	TraesCS6A03G0951400;TraesCS5A03G0669400;TraesCS5B03G0393900;TraesCS1A03G0696200;TraesCS4D03G0435100;TraesCS3B03G0484700;TraesCS4B03G0489100;TraesCS4B03G0712900;TraesCS6B03G0822000;TraesCS2A03G1019200;TraesCS3A03G0830700;TraesCS3D03G0761900;TraesCS4A03G0078800;TraesCS2A03G0999000;TraesCS3A03G0822800;TraesCS4A03G0124800;TraesCS1D03G0166900;TraesCS3A03G0392300;TraesCS5D03G0873200;TraesCS2D03G0353500…
GO:1903506	regulation of nucleic acid-templated transcription	5.232e-05	6.044e-05	4290	128 (2.98%)	TraesCS6A03G0951400;TraesCS5A03G0669400;TraesCS5B03G0393900;TraesCS1A03G0696200;TraesCS4D03G0435100;TraesCS3B03G0484700;TraesCS4B03G0489100;TraesCS4B03G0712900;TraesCS6B03G0822000;TraesCS2A03G1019200;TraesCS3A03G0830700;TraesCS3D03G0761900;TraesCS4A03G0078800;TraesCS2A03G0999000;TraesCS3A03G0822800;TraesCS4A03G0124800;TraesCS1D03G0166900;TraesCS3A03G0392300;TraesCS5D03G0873200;TraesCS2D03G0353500…
GO:0006829	zinc ion transport	5.407e-05	6.246e-05	47	7 (14.89%)	TraesCS1B03G0348200;TraesCS7B03G0858100;TraesCS5A03G0919100;TraesCS1A03G0268100;TraesCS7A03G1017300;TraesCS2A03G1176600;TraesCS2B03G1338500
GO:0002237	response to molecule of bacterial origin	5.71e-05	6.593e-05	11	4 (36.36%)	TraesCS3A03G0076900;TraesCS3D03G0075200;TraesCS3B03G0103500;TraesCS6A03G0350400
GO:0051252	regulation of RNA metabolic process	6.159e-05	7.11e-05	4387	130 (2.96%)	TraesCS6A03G0951400;TraesCS5A03G0669400;TraesCS5B03G0393900;TraesCS1A03G0696200;TraesCS4D03G0435100;TraesCS3B03G0484700;TraesCS4B03G0489100;TraesCS4B03G0712900;TraesCS6B03G0822000;TraesCS2A03G1019200;TraesCS3A03G0830700;TraesCS3D03G0761900;TraesCS4A03G0078800;TraesCS2A03G0999000;TraesCS3A03G0822800;TraesCS4A03G0124800;TraesCS1D03G0166900;TraesCS3A03G0392300;TraesCS5D03G0873200;TraesCS2D03G0353500…
GO:0042762	regulation of sulfur metabolic process	6.276e-05	7.244e-05	21	5 (23.81%)	TraesCS3A03G0787100;TraesCS4A03G0573600;TraesCS4B03G0228300;TraesCS4D03G0190300;TraesCS3B03G0906100
GO:0009937	regulation of gibberellic acid mediated signaling pathway	7.981e-05	9.21e-05	22	5 (22.73%)	TraesCS3A03G0830700;TraesCS3D03G0761900;TraesCS6A03G0350400;TraesCS1A03G0655800;TraesCS3B03G0951200
GO:0071216	cellular response to biotic stimulus	8.989e-05	0.0001037	5	3 (60%)	TraesCS3A03G0076900;TraesCS3D03G0075200;TraesCS3B03G0103500
GO:0071219	cellular response to molecule of bacterial origin	8.989e-05	0.0001037	5	3 (60%)	TraesCS3A03G0076900;TraesCS3D03G0075200;TraesCS3B03G0103500
GO:0019219	regulation of nucleobase-containing compound metabolic process	9.618e-05	0.0001109	4433	130 (2.93%)	TraesCS6A03G0951400;TraesCS5A03G0669400;TraesCS5B03G0393900;TraesCS1A03G0696200;TraesCS4D03G0435100;TraesCS3B03G0484700;TraesCS4B03G0489100;TraesCS4B03G0712900;TraesCS6B03G0822000;TraesCS2A03G1019200;TraesCS3A03G0830700;TraesCS3D03G0761900;TraesCS4A03G0078800;TraesCS2A03G0999000;TraesCS3A03G0822800;TraesCS4A03G0124800;TraesCS1D03G0166900;TraesCS3A03G0392300;TraesCS5D03G0873200;TraesCS2D03G0353500…
GO:0031326	regulation of cellular biosynthetic process	9.925e-05	0.0001144	4599	134 (2.91%)	TraesCS6A03G0951400;TraesCS5A03G0669400;TraesCS5B03G0393900;TraesCS1A03G0696200;TraesCS4D03G0435100;TraesCS3B03G0484700;TraesCS4B03G0489100;TraesCS4B03G0712900;TraesCS6B03G0822000;TraesCS2A03G1019200;TraesCS3A03G0830700;TraesCS3D03G0761900;TraesCS4A03G0078800;TraesCS2A03G0999000;TraesCS3A03G0822800;TraesCS4A03G0124800;TraesCS1D03G0166900;TraesCS3A03G0392300;TraesCS5D03G0873200;TraesCS2D03G0353500…
GO:2000377	regulation of reactive oxygen species metabolic process	0.0001002	0.0001155	23	5 (21.74%)	TraesCS3A03G0787100;TraesCS4A03G0573600;TraesCS4B03G0228300;TraesCS4D03G0190300;TraesCS3B03G0906100
GO:0009889	regulation of biosynthetic process	0.000105	0.000121	4605	134 (2.91%)	TraesCS6A03G0951400;TraesCS5A03G0669400;TraesCS5B03G0393900;TraesCS1A03G0696200;TraesCS4D03G0435100;TraesCS3B03G0484700;TraesCS4B03G0489100;TraesCS4B03G0712900;TraesCS6B03G0822000;TraesCS2A03G1019200;TraesCS3A03G0830700;TraesCS3D03G0761900;TraesCS4A03G0078800;TraesCS2A03G0999000;TraesCS3A03G0822800;TraesCS4A03G0124800;TraesCS1D03G0166900;TraesCS3A03G0392300;TraesCS5D03G0873200;TraesCS2D03G0353500…
GO:0006811	ion transport	0.0001062	0.0001223	1564	56 (3.58%)	TraesCS5D03G0551100;TraesCS7D03G1218400;TraesCS2D03G0432100;TraesCS1A03G0268100;TraesCS1D03G0351700;TraesCS2D03G1200500;TraesCS7A03G1017300;TraesCS2D03G1200300;TraesCS2A03G1245100;TraesCS2B03G0699900;TraesCS3A03G1035900;TraesCS2B03G1146000;TraesCS7B03G0858100;TraesCS2B03G1425800;TraesCS5A03G0078600;TraesCS3B03G1191300;TraesCS1B03G0348200;TraesCS2B03G0172800;TraesCS2A03G0415000;TraesCS1B03G0453200…
GO:0010224	response to UV-B	0.0001139	0.0001312	37	6 (16.22%)	TraesCS3A03G0076900;TraesCS3D03G0075200;TraesCS3B03G0103500;TraesCS4D03G0488700;TraesCS4A03G0218300;TraesCS4B03G0554300
GO:0048585	negative regulation of response to stimulus	0.0001547	0.0001782	114	10 (8.77%)	TraesCS5A03G0576900;TraesCS3A03G0830700;TraesCS4A03G0573600;TraesCS2A03G0416100;TraesCS3D03G0761900;TraesCS6A03G0350400;TraesCS4B03G0228300;TraesCS4D03G0190300;TraesCS3B03G0951200;TraesCS5D03G0541400
GO:0050832	defense response to fungus	0.0001663	0.0001915	115	10 (8.7%)	TraesCS1B03G1001500;TraesCS3B03G0858000;TraesCS6A03G0861500;TraesCS4D03G0488700;TraesCS6A03G0350400;TraesCS3D03G0691300;TraesCS6B03G1030800;TraesCS5D03G0913400;TraesCS4A03G0218300;TraesCS4B03G0554300
GO:0044550	secondary metabolite biosynthetic process	0.0001685	0.000194	94	9 (9.57%)	TraesCS1B03G0108400;TraesCS2D03G0459600;TraesCS2D03G0057400;TraesCS4D03G0488700;TraesCS1B03G0334900;TraesCS2B03G0540200;TraesCS5B03G1146900;TraesCS4A03G0218300;TraesCS4B03G0554300
GO:0031099	regeneration	0.000177	0.0002036	6	3 (50%)	TraesCS2A03G0801300;TraesCS2B03G0887400;TraesCS2D03G0741000
GO:0009404	toxin metabolic process	0.000177	0.0002036	6	3 (50%)	TraesCS4D03G0488700;TraesCS4A03G0218300;TraesCS4B03G0554300
GO:0052314	phytoalexin metabolic process	0.000177	0.0002036	6	3 (50%)	TraesCS4D03G0488700;TraesCS4A03G0218300;TraesCS4B03G0554300
GO:0046217	indole phytoalexin metabolic process	0.000177	0.0002036	6	3 (50%)	TraesCS4D03G0488700;TraesCS4A03G0218300;TraesCS4B03G0554300
GO:0009403	toxin biosynthetic process	0.000177	0.0002036	6	3 (50%)	TraesCS4D03G0488700;TraesCS4A03G0218300;TraesCS4B03G0554300
GO:0052315	phytoalexin biosynthetic process	0.000177	0.0002036	6	3 (50%)	TraesCS4D03G0488700;TraesCS4A03G0218300;TraesCS4B03G0554300
GO:0009700	indole phytoalexin biosynthetic process	0.000177	0.0002036	6	3 (50%)	TraesCS4D03G0488700;TraesCS4A03G0218300;TraesCS4B03G0554300
GO:0052317	camalexin metabolic process	0.000177	0.0002036	6	3 (50%)	TraesCS4D03G0488700;TraesCS4A03G0218300;TraesCS4B03G0554300
GO:0010120	camalexin biosynthetic process	0.000177	0.0002036	6	3 (50%)	TraesCS4D03G0488700;TraesCS4A03G0218300;TraesCS4B03G0554300
GO:0080136	priming of cellular response to stress	0.000177	0.0002036	6	3 (50%)	TraesCS4D03G0488700;TraesCS4A03G0218300;TraesCS4B03G0554300
GO:1902065	response to L-glutamate	0.000177	0.0002036	6	3 (50%)	TraesCS4D03G0488700;TraesCS4A03G0218300;TraesCS4B03G0554300
GO:0010353	response to trehalose	0.000177	0.0002036	6	3 (50%)	TraesCS4A03G0573600;TraesCS4B03G0228300;TraesCS4D03G0190300
GO:0070574	cadmium ion transmembrane transport	0.000177	0.0002036	6	3 (50%)	TraesCS7B03G0858100;TraesCS5A03G0919100;TraesCS7A03G1017300
GO:0034975	protein folding in endoplasmic reticulum	0.000177	0.0002036	6	3 (50%)	TraesCS6B03G0137600;TraesCS6D03G0103400;TraesCS6A03G0096800
GO:0010468	regulation of gene expression	0.0002095	0.000241	4846	138 (2.85%)	TraesCS6A03G0951400;TraesCS5A03G0669400;TraesCS5B03G0393900;TraesCS1A03G0696200;TraesCS4D03G0435100;TraesCS6B03G0931400;TraesCS3B03G0484700;TraesCS4B03G0489100;TraesCS4B03G0712900;TraesCS6B03G0822000;TraesCS1D03G0507600;TraesCS2A03G1019200;TraesCS3A03G0830700;TraesCS3D03G0761900;TraesCS4A03G0078800;TraesCS2A03G0999000;TraesCS3A03G0822800;TraesCS4A03G0124800;TraesCS1D03G0166900;TraesCS3A03G0392300…
GO:0010118	stomatal movement	0.0002208	0.000254	15	4 (26.67%)	TraesCS2B03G0699900;TraesCS5B03G1137700;TraesCS2A03G0606900;TraesCS5A03G1074600
GO:0001666	response to hypoxia	0.0002208	0.000254	15	4 (26.67%)	TraesCS4A03G0573600;TraesCS4B03G0228300;TraesCS4D03G0190300;TraesCS7B03G0714200
GO:0002684	positive regulation of immune system process	0.0002242	0.0002579	27	5 (18.52%)	TraesCS2A03G0801300;TraesCS6A03G0861500;TraesCS2B03G0887400;TraesCS6B03G1030800;TraesCS2D03G0741000
GO:0050778	positive regulation of immune response	0.0002242	0.0002579	27	5 (18.52%)	TraesCS2A03G0801300;TraesCS6A03G0861500;TraesCS2B03G0887400;TraesCS6B03G1030800;TraesCS2D03G0741000
GO:0045089	positive regulation of innate immune response	0.0002242	0.0002579	27	5 (18.52%)	TraesCS2A03G0801300;TraesCS6A03G0861500;TraesCS2B03G0887400;TraesCS6B03G1030800;TraesCS2D03G0741000
GO:0031348	negative regulation of defense response	0.0002242	0.0002579	27	5 (18.52%)	TraesCS5A03G0576900;TraesCS4A03G0573600;TraesCS4B03G0228300;TraesCS4D03G0190300;TraesCS5D03G0541400
GO:0015914	phospholipid transport	0.000235	0.0002701	42	6 (14.29%)	TraesCS4A03G0697700;TraesCS4D03G0080500;TraesCS1A03G0005200;TraesCS4D03G0436300;TraesCS1D03G0001500;TraesCS1B03G0003300
GO:0002682	regulation of immune system process	0.0002682	0.0003083	43	6 (13.95%)	TraesCS2A03G0801300;TraesCS6A03G0861500;TraesCS2B03G0887400;TraesCS6B03G1030800;TraesCS1D03G1014400;TraesCS2D03G0741000
GO:0050776	regulation of immune response	0.0002682	0.0003083	43	6 (13.95%)	TraesCS2A03G0801300;TraesCS6A03G0861500;TraesCS2B03G0887400;TraesCS6B03G1030800;TraesCS1D03G1014400;TraesCS2D03G0741000
GO:0050826	response to freezing	0.0003048	0.0003503	7	3 (42.86%)	TraesCS4D03G0488700;TraesCS4A03G0218300;TraesCS4B03G0554300
GO:0043200	response to amino acid	0.0003048	0.0003503	7	3 (42.86%)	TraesCS4D03G0488700;TraesCS4A03G0218300;TraesCS4B03G0554300
GO:0015691	cadmium ion transport	0.0003048	0.0003503	7	3 (42.86%)	TraesCS7B03G0858100;TraesCS5A03G0919100;TraesCS7A03G1017300
GO:0071310	cellular response to organic substance	0.0003579	0.0004112	459	22 (4.79%)	TraesCS2A03G0801300;TraesCS4A03G0573600;TraesCS7B03G0802400;TraesCS2A03G0416100;TraesCS3B03G0858000;TraesCS1A03G0301300;TraesCS4B03G0228300;TraesCS7A03G0380000;TraesCS3D03G0691300;TraesCS3D03G0225500;TraesCS6B03G1030800;TraesCS3B03G0796100;TraesCS4A03G0238700;TraesCS3A03G0309300;TraesCS3A03G0234800;TraesCS6A03G0861500;TraesCS2B03G0887400;TraesCS3A03G0230900;TraesCS4D03G0190300;TraesCS3B03G0374100…
GO:2000112	regulation of cellular macromolecule biosynthetic process	0.0003864	0.0004438	4546	129 (2.84%)	TraesCS6A03G0951400;TraesCS5A03G0669400;TraesCS5B03G0393900;TraesCS1A03G0696200;TraesCS4D03G0435100;TraesCS3B03G0484700;TraesCS4B03G0489100;TraesCS4B03G0712900;TraesCS6B03G0822000;TraesCS2A03G1019200;TraesCS3A03G0830700;TraesCS3D03G0761900;TraesCS4A03G0078800;TraesCS2A03G0999000;TraesCS3A03G0822800;TraesCS4A03G0124800;TraesCS1D03G0166900;TraesCS3A03G0392300;TraesCS5D03G0873200;TraesCS2D03G0353500…
GO:0010556	regulation of macromolecule biosynthetic process	0.0004033	0.0004631	4551	129 (2.83%)	TraesCS6A03G0951400;TraesCS5A03G0669400;TraesCS5B03G0393900;TraesCS1A03G0696200;TraesCS4D03G0435100;TraesCS3B03G0484700;TraesCS4B03G0489100;TraesCS4B03G0712900;TraesCS6B03G0822000;TraesCS2A03G1019200;TraesCS3A03G0830700;TraesCS3D03G0761900;TraesCS4A03G0078800;TraesCS2A03G0999000;TraesCS3A03G0822800;TraesCS4A03G0124800;TraesCS1D03G0166900;TraesCS3A03G0392300;TraesCS5D03G0873200;TraesCS2D03G0353500…
GO:1990573	potassium ion import across plasma membrane	0.0004418	0.0005072	2	2 (100%)	TraesCS2B03G0699900;TraesCS2A03G0606900
GO:1900425	negative regulation of defense response to bacterium	0.0004418	0.0005072	2	2 (100%)	TraesCS5A03G0576900;TraesCS5D03G0541400
GO:0055085	transmembrane transport	0.0004674	0.0005365	3222	96 (2.98%)	TraesCS1B03G0972500;TraesCS4D03G0590400;TraesCS3D03G0791000;TraesCS2A03G0638900;TraesCS5D03G0551100;TraesCS2B03G1552700;TraesCS2D03G0432100;TraesCS3B03G0648700;TraesCS2A03G0907100;TraesCS2D03G0849600;TraesCS5A03G0096900;TraesCS1A03G0268100;TraesCS7A03G1017300;TraesCS1A03G0530700;TraesCS4D03G0626400;TraesCS1B03G0777100;TraesCS2B03G0699900;TraesCS3A03G1035900;TraesCS2B03G1146000;TraesCS7B03G0399300…
GO:0051091	positive regulation of DNA-binding transcription factor activity	0.0004801	0.0005509	8	3 (37.5%)	TraesCS4D03G0448900;TraesCS4A03G0265000;TraesCS4B03G0503000
GO:0002213	defense response to insect	0.0004801	0.0005509	8	3 (37.5%)	TraesCS4A03G0573600;TraesCS4B03G0228300;TraesCS4D03G0190300
GO:0010225	response to UV-C	0.0004801	0.0005509	8	3 (37.5%)	TraesCS4A03G0573600;TraesCS4B03G0228300;TraesCS4D03G0190300
GO:0010942	positive regulation of cell death	0.0004801	0.0005509	8	3 (37.5%)	TraesCS4A03G0573600;TraesCS4B03G0228300;TraesCS4D03G0190300
GO:1900376	regulation of secondary metabolite biosynthetic process	0.0004801	0.0005509	8	3 (37.5%)	TraesCS4A03G0573600;TraesCS4B03G0228300;TraesCS4D03G0190300
GO:0007568	aging	0.0005939	0.0006813	33	5 (15.15%)	TraesCS4A03G0573600;TraesCS3A03G0234800;TraesCS4B03G0228300;TraesCS4D03G0190300;TraesCS3D03G0225500
GO:0090693	plant organ senescence	0.0005939	0.0006813	33	5 (15.15%)	TraesCS4A03G0573600;TraesCS3A03G0234800;TraesCS4B03G0228300;TraesCS4D03G0190300;TraesCS3D03G0225500
GO:0010150	leaf senescence	0.0005939	0.0006813	33	5 (15.15%)	TraesCS4A03G0573600;TraesCS3A03G0234800;TraesCS4B03G0228300;TraesCS4D03G0190300;TraesCS3D03G0225500
GO:0002239	response to oomycetes	0.0006171	0.0007078	50	6 (12%)	TraesCS3A03G0076900;TraesCS3D03G0075200;TraesCS2D03G0421300;TraesCS3B03G0103500;TraesCS7D03G0183900;TraesCS3B03G0860600
GO:0002229	defense response to oomycetes	0.0006171	0.0007078	50	6 (12%)	TraesCS3A03G0076900;TraesCS3D03G0075200;TraesCS2D03G0421300;TraesCS3B03G0103500;TraesCS7D03G0183900;TraesCS3B03G0860600
GO:0071324	cellular response to disaccharide stimulus	0.0007088	0.0008128	9	3 (33.33%)	TraesCS4A03G0573600;TraesCS4B03G0228300;TraesCS4D03G0190300
GO:0043288	apocarotenoid metabolic process	0.0007088	0.0008128	9	3 (33.33%)	TraesCS6D03G0607800;TraesCS6A03G0725000;TraesCS6B03G0858400
GO:1902644	tertiary alcohol metabolic process	0.0007088	0.0008128	9	3 (33.33%)	TraesCS6D03G0607800;TraesCS6A03G0725000;TraesCS6B03G0858400
GO:0009687	abscisic acid metabolic process	0.0007088	0.0008128	9	3 (33.33%)	TraesCS6D03G0607800;TraesCS6A03G0725000;TraesCS6B03G0858400
GO:0042221	response to chemical	0.0007433	0.0008521	1733	57 (3.29%)	TraesCS4D03G0024100;TraesCS1B03G0708800;TraesCS2A03G0416100;TraesCS3B03G0858000;TraesCS3D03G0225500;TraesCS5A03G1074600;TraesCS2B03G0699900;TraesCS4A03G0751100;TraesCS3A03G0830700;TraesCS7B03G0858100;TraesCS3D03G0761900;TraesCS2A03G0941300;TraesCS3B03G0374100;TraesCS2D03G0741000;TraesCS2A03G0801300;TraesCS4A03G0573600;TraesCS4D03G0488700;TraesCS4B03G0228300;TraesCS7A03G0380000;TraesCS3D03G0691300…
GO:0071805	potassium ion transmembrane transport	0.0007536	0.0008637	115	9 (7.83%)	TraesCS2A03G0723800;TraesCS2B03G0699900;TraesCS3A03G1035900;TraesCS2A03G0606900;TraesCS6D03G0656800;TraesCS2D03G0667000;TraesCS3B03G1191300;TraesCS2B03G0799700;TraesCS6A03G0775300
GO:0009803	cinnamic acid metabolic process	0.0007846	0.000899	35	5 (14.29%)	TraesCS1B03G0108400;TraesCS2D03G0459600;TraesCS1B03G0334900;TraesCS2B03G0540200;TraesCS5B03G1146900
GO:0009800	cinnamic acid biosynthetic process	0.0007846	0.000899	35	5 (14.29%)	TraesCS1B03G0108400;TraesCS2D03G0459600;TraesCS1B03G0334900;TraesCS2B03G0540200;TraesCS5B03G1146900
GO:0050794	regulation of cellular process	0.0009593	0.001099	6861	181 (2.64%)	TraesCS6A03G0951400;TraesCS7A03G0425500;TraesCS5A03G0669400;TraesCS5B03G0393900;TraesCS1A03G0696200;TraesCS4D03G0435100;TraesCS3B03G0484700;TraesCS4B03G0489100;TraesCS4B03G0712900;TraesCS3D03G0225500;TraesCS6B03G0822000;TraesCS2B03G0699900;TraesCS2A03G1019200;TraesCS3A03G0830700;TraesCS3D03G0761900;TraesCS4A03G0078800;TraesCS2A03G0999000;TraesCS3A03G0822800;TraesCS3B03G0374100;TraesCS4A03G0124800…
GO:0006952	defense response	0.0009789	0.001121	729	29 (3.98%)	TraesCS3A03G0076900;TraesCS3B03G0103500;TraesCS3B03G0858000;TraesCS6B03G1030800;TraesCS5D03G0242600;TraesCS3D03G0075200;TraesCS6A03G0861500;TraesCS1A03G0059400;TraesCS4A03G0218300;TraesCS2B03G0504800;TraesCS4A03G0573600;TraesCS1B03G1001500;TraesCS2A03G0379000;TraesCS4D03G0488700;TraesCS6A03G0350400;TraesCS4B03G0228300;TraesCS3D03G0691300;TraesCS2D03G1201300;TraesCS5D03G0913400;TraesCS4A03G0238700…
GO:0070298	negative regulation of phosphorelay signal transduction system	0.0009967	0.001141	10	3 (30%)	TraesCS4A03G0573600;TraesCS4B03G0228300;TraesCS4D03G0190300
GO:0010105	negative regulation of ethylene-activated signaling pathway	0.0009967	0.001141	10	3 (30%)	TraesCS4A03G0573600;TraesCS4B03G0228300;TraesCS4D03G0190300
GO:0009695	jasmonic acid biosynthetic process	0.0009967	0.001141	10	3 (30%)	TraesCS6A03G0861500;TraesCS6B03G1030800;TraesCS5D03G0913400
GO:0040008	regulation of growth	0.001065	0.001219	171	11 (6.43%)	TraesCS3B03G1077200;TraesCS2A03G0801300;TraesCS3A03G0787100;TraesCS3A03G0944500;TraesCS4A03G0195500;TraesCS3D03G0877600;TraesCS2B03G0887400;TraesCS4D03G0514500;TraesCS2D03G0741000;TraesCS4B03G0579600;TraesCS3B03G0906100
GO:1902222	erythrose 4-phosphate/phosphoenolpyruvate family amino acid catabolic process	0.001133	0.001297	56	6 (10.71%)	TraesCS1B03G0108400;TraesCS2D03G0459600;TraesCS1D03G0244700;TraesCS1B03G0334900;TraesCS2B03G0540200;TraesCS5B03G1146900
GO:0006559	L-phenylalanine catabolic process	0.001133	0.001297	56	6 (10.71%)	TraesCS1B03G0108400;TraesCS2D03G0459600;TraesCS1D03G0244700;TraesCS1B03G0334900;TraesCS2B03G0540200;TraesCS5B03G1146900
GO:0023056	positive regulation of signaling	0.001244	0.001424	57	6 (10.53%)	TraesCS4A03G0573600;TraesCS4B03G0228300;TraesCS3A03G0894700;TraesCS4D03G0190300;TraesCS1D03G1014400;TraesCS1A03G0655800
GO:0009967	positive regulation of signal transduction	0.001244	0.001424	57	6 (10.53%)	TraesCS4A03G0573600;TraesCS4B03G0228300;TraesCS3A03G0894700;TraesCS4D03G0190300;TraesCS1D03G1014400;TraesCS1A03G0655800
GO:0043455	regulation of secondary metabolic process	0.001253	0.001433	23	4 (17.39%)	TraesCS2D03G0219000;TraesCS4A03G0573600;TraesCS4B03G0228300;TraesCS4D03G0190300
GO:0036293	response to decreased oxygen levels	0.001253	0.001433	23	4 (17.39%)	TraesCS4A03G0573600;TraesCS4B03G0228300;TraesCS4D03G0190300;TraesCS7B03G0714200
GO:0048545	response to steroid hormone	0.001298	0.001485	39	5 (12.82%)	TraesCS2A03G0801300;TraesCS3A03G0309300;TraesCS2B03G0887400;TraesCS3B03G0374100;TraesCS2D03G0741000
GO:0071383	cellular response to steroid hormone stimulus	0.001298	0.001485	39	5 (12.82%)	TraesCS2A03G0801300;TraesCS3A03G0309300;TraesCS2B03G0887400;TraesCS3B03G0374100;TraesCS2D03G0741000
GO:0043401	steroid hormone mediated signaling pathway	0.001298	0.001485	39	5 (12.82%)	TraesCS2A03G0801300;TraesCS3A03G0309300;TraesCS2B03G0887400;TraesCS3B03G0374100;TraesCS2D03G0741000
GO:0009742	brassinosteroid mediated signaling pathway	0.001298	0.001485	39	5 (12.82%)	TraesCS2A03G0801300;TraesCS3A03G0309300;TraesCS2B03G0887400;TraesCS3B03G0374100;TraesCS2D03G0741000
GO:0019755	one-carbon compound transport	0.001307	0.001494	3	2 (66.67%)	TraesCS1B03G0620900;TraesCS1A03G0530700
GO:0015840	urea transport	0.001307	0.001494	3	2 (66.67%)	TraesCS1B03G0620900;TraesCS1A03G0530700
GO:0071918	urea transmembrane transport	0.001307	0.001494	3	2 (66.67%)	TraesCS1B03G0620900;TraesCS1A03G0530700
GO:0002215	defense response to nematode	0.001307	0.001494	3	2 (66.67%)	TraesCS2B03G0504800;TraesCS2A03G0379000
GO:0010446	response to alkaline pH	0.001307	0.001494	3	2 (66.67%)	TraesCS2B03G1042000;TraesCS2A03G0941300
GO:1903426	regulation of reactive oxygen species biosynthetic process	0.001307	0.001494	3	2 (66.67%)	TraesCS3A03G0787100;TraesCS3B03G0906100
GO:0010728	regulation of hydrogen peroxide biosynthetic process	0.001307	0.001494	3	2 (66.67%)	TraesCS3A03G0787100;TraesCS3B03G0906100
GO:0080027	response to herbivore	0.001307	0.001494	3	2 (66.67%)	TraesCS3A03G0787100;TraesCS3B03G0906100
GO:0080140	regulation of jasmonic acid metabolic process	0.001307	0.001494	3	2 (66.67%)	TraesCS3A03G0787100;TraesCS3B03G0906100
GO:0080141	regulation of jasmonic acid biosynthetic process	0.001307	0.001494	3	2 (66.67%)	TraesCS3A03G0787100;TraesCS3B03G0906100
GO:0090332	stomatal closure	0.001307	0.001494	3	2 (66.67%)	TraesCS5B03G1137700;TraesCS5A03G1074600
GO:0033273	response to vitamin	0.001307	0.001494	3	2 (66.67%)	TraesCS6A03G0861500;TraesCS6B03G1030800
GO:0033274	response to vitamin B2	0.001307	0.001494	3	2 (66.67%)	TraesCS6A03G0861500;TraesCS6B03G1030800
GO:0051090	regulation of DNA-binding transcription factor activity	0.001349	0.001542	11	3 (27.27%)	TraesCS4D03G0448900;TraesCS4A03G0265000;TraesCS4B03G0503000
GO:0045088	regulation of innate immune response	0.001458	0.001667	40	5 (12.5%)	TraesCS2A03G0801300;TraesCS6A03G0861500;TraesCS2B03G0887400;TraesCS6B03G1030800;TraesCS2D03G0741000
GO:0048367	shoot system development	0.001465	0.001673	262	14 (5.34%)	TraesCS4A03G0573600;TraesCS4D03G0488700;TraesCS4B03G0228300;TraesCS2B03G0820700;TraesCS3D03G0225500;TraesCS6B03G1030800;TraesCS1D03G0507600;TraesCS3A03G0234800;TraesCS1A03G0526300;TraesCS6A03G0861500;TraesCS4D03G0190300;TraesCS1A03G0655800;TraesCS4A03G0218300;TraesCS4B03G0554300
GO:0070482	response to oxygen levels	0.001479	0.001689	24	4 (16.67%)	TraesCS4A03G0573600;TraesCS4B03G0228300;TraesCS4D03G0190300;TraesCS7B03G0714200
GO:0046622	positive regulation of organ growth	0.001771	0.002022	12	3 (25%)	TraesCS3B03G1077200;TraesCS3A03G0944500;TraesCS3D03G0877600
GO:0070297	regulation of phosphorelay signal transduction system	0.001771	0.002022	12	3 (25%)	TraesCS4A03G0573600;TraesCS4B03G0228300;TraesCS4D03G0190300
GO:0010104	regulation of ethylene-activated signaling pathway	0.001771	0.002022	12	3 (25%)	TraesCS4A03G0573600;TraesCS4B03G0228300;TraesCS4D03G0190300
GO:0071322	cellular response to carbohydrate stimulus	0.001771	0.002022	12	3 (25%)	TraesCS4A03G0573600;TraesCS4B03G0228300;TraesCS4D03G0190300
GO:0045927	positive regulation of growth	0.001774	0.002025	61	6 (9.84%)	TraesCS3B03G1077200;TraesCS3A03G0944500;TraesCS4A03G0195500;TraesCS3D03G0877600;TraesCS4D03G0514500;TraesCS4B03G0579600
GO:0016042	lipid catabolic process	0.001819	0.002077	239	13 (5.44%)	TraesCS7D03G1162900;TraesCS4B03G0756100;TraesCS7A03G0478300;TraesCS1A03G0888500;TraesCS7A03G1223700;TraesCS7D03G0753800;TraesCS7B03G0292300;TraesCS1A03G0753800;TraesCS3D03G0059700;TraesCS3B03G0904700;TraesCS1D03G0864400;TraesCS5D03G0859900;TraesCS7B03G1108300
GO:0071367	cellular response to brassinosteroid stimulus	0.001821	0.002078	42	5 (11.9%)	TraesCS2A03G0801300;TraesCS3A03G0309300;TraesCS2B03G0887400;TraesCS3B03G0374100;TraesCS2D03G0741000
GO:0019222	regulation of metabolic process	0.001889	0.002155	5424	145 (2.67%)	TraesCS6A03G0951400;TraesCS5A03G0669400;TraesCS5B03G0393900;TraesCS1A03G0696200;TraesCS4D03G0435100;TraesCS6B03G0931400;TraesCS3B03G0484700;TraesCS4B03G0489100;TraesCS4B03G0712900;TraesCS6B03G0822000;TraesCS1D03G0507600;TraesCS2A03G1019200;TraesCS3A03G0830700;TraesCS3D03G0761900;TraesCS4A03G0078800;TraesCS2A03G0999000;TraesCS3A03G0822800;TraesCS4A03G0124800;TraesCS1D03G0166900;TraesCS3A03G0392300…
GO:0010647	positive regulation of cell communication	0.001929	0.002201	62	6 (9.68%)	TraesCS4A03G0573600;TraesCS4B03G0228300;TraesCS3A03G0894700;TraesCS4D03G0190300;TraesCS1D03G1014400;TraesCS1A03G0655800
GO:0048518	positive regulation of biological process	0.001942	0.002215	870	32 (3.68%)	TraesCS3A03G0076900;TraesCS7B03G0745400;TraesCS3B03G0103500;TraesCS3D03G0877600;TraesCS6B03G1030800;TraesCS6B03G0822000;TraesCS1D03G0507600;TraesCS3B03G1077200;TraesCS3A03G0830700;TraesCS3D03G0075200;TraesCS6A03G0861500;TraesCS2B03G0887400;TraesCS3D03G0761900;TraesCS1D03G1014400;TraesCS2D03G0741000;TraesCS1A03G0655800;TraesCS3B03G0951200;TraesCS4A03G0218300;TraesCS2A03G0801300;TraesCS3A03G0944500…
GO:0120255	olefinic compound biosynthetic process	0.002026	0.002309	43	5 (11.63%)	TraesCS1B03G0108400;TraesCS2D03G0459600;TraesCS1B03G0334900;TraesCS2B03G0540200;TraesCS5B03G1146900
GO:0031323	regulation of cellular metabolic process	0.002093	0.002385	5099	137 (2.69%)	TraesCS6A03G0951400;TraesCS5A03G0669400;TraesCS5B03G0393900;TraesCS1A03G0696200;TraesCS4D03G0435100;TraesCS3B03G0484700;TraesCS4B03G0489100;TraesCS4B03G0712900;TraesCS6B03G0822000;TraesCS2A03G1019200;TraesCS3A03G0830700;TraesCS3D03G0761900;TraesCS4A03G0078800;TraesCS2A03G0999000;TraesCS3A03G0822800;TraesCS4A03G0124800;TraesCS1D03G0166900;TraesCS3A03G0392300;TraesCS5D03G0873200;TraesCS2D03G0353500…
GO:0051171	regulation of nitrogen compound metabolic process	0.002217	0.002526	4980	134 (2.69%)	TraesCS6A03G0951400;TraesCS5A03G0669400;TraesCS5B03G0393900;TraesCS1A03G0696200;TraesCS4D03G0435100;TraesCS3B03G0484700;TraesCS4B03G0489100;TraesCS4B03G0712900;TraesCS6B03G0822000;TraesCS2A03G1019200;TraesCS3A03G0830700;TraesCS3D03G0761900;TraesCS4A03G0078800;TraesCS2A03G0999000;TraesCS3A03G0822800;TraesCS4A03G0124800;TraesCS1D03G0166900;TraesCS3A03G0392300;TraesCS5D03G0873200;TraesCS2D03G0353500…
GO:1902532	negative regulation of intracellular signal transduction	0.002266	0.002582	13	3 (23.08%)	TraesCS4A03G0573600;TraesCS4B03G0228300;TraesCS4D03G0190300
GO:0006749	glutathione metabolic process	0.002274	0.00259	399	18 (4.51%)	TraesCS7A03G1278400;TraesCS5B03G1052000;TraesCS5D03G0952300;TraesCS3D03G0150100;TraesCS6A03G0133300;TraesCS1D03G0486100;TraesCS1B03G0574000;TraesCS1A03G0502000;TraesCS1D03G0486500;TraesCS5A03G1005400;TraesCS3D03G1068100;TraesCS3D03G0946800;TraesCS5D03G0966800;TraesCS3B03G1345200;TraesCS1A03G0502800;TraesCS7D03G0180100;TraesCS4A03G0866100;TraesCS5A03G0398600
GO:0042430	indole-containing compound metabolic process	0.002277	0.002593	86	7 (8.14%)	TraesCS7A03G1243400;TraesCS4D03G0488700;TraesCS7B03G1143000;TraesCS5B03G1093500;TraesCS4A03G0218300;TraesCS4B03G0554300;TraesCS5D03G0983900
GO:0045815	epigenetic maintenance of chromatin in transcription-competent conformation	0.002577	0.002934	4	2 (50%)	TraesCS1A03G0526300;TraesCS1D03G0507600
GO:0018871	1-aminocyclopropane-1-carboxylate metabolic process	0.002577	0.002934	4	2 (50%)	TraesCS2A03G0955200;TraesCS2D03G0897400
GO:0042218	1-aminocyclopropane-1-carboxylate biosynthetic process	0.002577	0.002934	4	2 (50%)	TraesCS2A03G0955200;TraesCS2D03G0897400
GO:0035627	ceramide transport	0.002577	0.002934	4	2 (50%)	TraesCS4A03G0697700;TraesCS4D03G0080500
GO:1902389	ceramide 1-phosphate transport	0.002577	0.002934	4	2 (50%)	TraesCS4A03G0697700;TraesCS4D03G0080500
GO:0071396	cellular response to lipid	0.002662	0.003029	192	11 (5.73%)	TraesCS2A03G0801300;TraesCS4A03G0238700;TraesCS3A03G0309300;TraesCS3A03G0234800;TraesCS2A03G0416100;TraesCS6A03G0861500;TraesCS2B03G0887400;TraesCS3B03G0374100;TraesCS3D03G0225500;TraesCS6B03G1030800;TraesCS2D03G0741000
GO:0010229	inflorescence development	0.002839	0.003231	14	3 (21.43%)	TraesCS4D03G0488700;TraesCS4A03G0218300;TraesCS4B03G0554300
GO:0000041	transition metal ion transport	0.002955	0.003361	140	9 (6.43%)	TraesCS1B03G0348200;TraesCS2A03G0415000;TraesCS2D03G0432100;TraesCS7B03G0858100;TraesCS5A03G0919100;TraesCS1A03G0268100;TraesCS7A03G1017300;TraesCS2A03G1176600;TraesCS2B03G1338500
GO:0097305	response to alcohol	0.00306	0.00348	284	14 (4.93%)	TraesCS2A03G0416100;TraesCS3B03G0207200;TraesCS6A03G0350400;TraesCS6D03G0101500;TraesCS6B03G1030800;TraesCS3B03G0906100;TraesCS5A03G1074600;TraesCS3A03G0787100;TraesCS3A03G0830700;TraesCS4A03G0238700;TraesCS5B03G1137700;TraesCS6A03G0861500;TraesCS3D03G0761900;TraesCS3B03G0951200
GO:0009737	response to abscisic acid	0.00306	0.00348	284	14 (4.93%)	TraesCS2A03G0416100;TraesCS3B03G0207200;TraesCS6A03G0350400;TraesCS6D03G0101500;TraesCS6B03G1030800;TraesCS3B03G0906100;TraesCS5A03G1074600;TraesCS3A03G0787100;TraesCS3A03G0830700;TraesCS4A03G0238700;TraesCS5B03G1137700;TraesCS6A03G0861500;TraesCS3D03G0761900;TraesCS3B03G0951200
GO:0009867	jasmonic acid mediated signaling pathway	0.003451	0.003924	30	4 (13.33%)	TraesCS3A03G0234800;TraesCS6A03G0861500;TraesCS3D03G0225500;TraesCS6B03G1030800
GO:0006542	glutamine biosynthetic process	0.003494	0.003972	15	3 (20%)	TraesCS1B03G0457500;TraesCS6B03G0928600;TraesCS6A03G0782800
GO:0048639	positive regulation of developmental growth	0.003494	0.003972	15	3 (20%)	TraesCS3B03G1077200;TraesCS3A03G0944500;TraesCS3D03G0877600
GO:0042330	taxis	0.003494	0.003972	15	3 (20%)	TraesCS4D03G0488700;TraesCS4A03G0218300;TraesCS4B03G0554300
GO:0006935	chemotaxis	0.003494	0.003972	15	3 (20%)	TraesCS4D03G0488700;TraesCS4A03G0218300;TraesCS4B03G0554300
GO:0050918	positive chemotaxis	0.003494	0.003972	15	3 (20%)	TraesCS4D03G0488700;TraesCS4A03G0218300;TraesCS4B03G0554300
GO:0010183	pollen tube guidance	0.003494	0.003972	15	3 (20%)	TraesCS4D03G0488700;TraesCS4A03G0218300;TraesCS4B03G0554300
GO:0006869	lipid transport	0.003796	0.004314	291	14 (4.81%)	TraesCS3D03G0066700;TraesCS4D03G0080500;TraesCS1A03G0005200;TraesCS4D03G0436300;TraesCS1D03G0001500;TraesCS6A03G0824800;TraesCS3A03G0089200;TraesCS4A03G0697700;TraesCS4B03G0097800;TraesCS1B03G0853300;TraesCS1A03G0117100;TraesCS2D03G1066000;TraesCS1B03G0155900;TraesCS1B03G0003300
GO:0060255	regulation of macromolecule metabolic process	0.004323	0.004912	5293	139 (2.63%)	TraesCS6A03G0951400;TraesCS5A03G0669400;TraesCS5B03G0393900;TraesCS1A03G0696200;TraesCS4D03G0435100;TraesCS6B03G0931400;TraesCS3B03G0484700;TraesCS4B03G0489100;TraesCS4B03G0712900;TraesCS6B03G0822000;TraesCS1D03G0507600;TraesCS2A03G1019200;TraesCS3A03G0830700;TraesCS3D03G0761900;TraesCS4A03G0078800;TraesCS2A03G0999000;TraesCS3A03G0822800;TraesCS4A03G0124800;TraesCS1D03G0166900;TraesCS3A03G0392300…
GO:0015748	organophosphate ester transport	0.004399	0.004997	73	6 (8.22%)	TraesCS4A03G0697700;TraesCS4D03G0080500;TraesCS1A03G0005200;TraesCS4D03G0436300;TraesCS1D03G0001500;TraesCS1B03G0003300
GO:0071395	cellular response to jasmonic acid stimulus	0.004903	0.005568	33	4 (12.12%)	TraesCS3A03G0234800;TraesCS6A03G0861500;TraesCS3D03G0225500;TraesCS6B03G1030800
GO:0010876	lipid localization	0.004947	0.005617	300	14 (4.67%)	TraesCS3D03G0066700;TraesCS4D03G0080500;TraesCS1A03G0005200;TraesCS4D03G0436300;TraesCS1D03G0001500;TraesCS6A03G0824800;TraesCS3A03G0089200;TraesCS4A03G0697700;TraesCS4B03G0097800;TraesCS1B03G0853300;TraesCS1A03G0117100;TraesCS2D03G1066000;TraesCS1B03G0155900;TraesCS1B03G0003300
GO:0006575	cellular modified amino acid metabolic process	0.004989	0.005663	464	19 (4.09%)	TraesCS7A03G1278400;TraesCS3D03G0361800;TraesCS5B03G1052000;TraesCS5D03G0952300;TraesCS3D03G0150100;TraesCS6A03G0133300;TraesCS1D03G0486100;TraesCS1B03G0574000;TraesCS1A03G0502000;TraesCS1D03G0486500;TraesCS5A03G1005400;TraesCS3D03G1068100;TraesCS3D03G0946800;TraesCS5D03G0966800;TraesCS3B03G1345200;TraesCS1A03G0502800;TraesCS7D03G0180100;TraesCS4A03G0866100;TraesCS5A03G0398600
GO:0009765	photosynthesis, light harvesting	0.004995	0.005668	99	7 (7.07%)	TraesCS6A03G0216900;TraesCS1D03G0873700;TraesCS6A03G0215300;TraesCS6B03G0306000;TraesCS1B03G1053200;TraesCS6A03G0217000;TraesCS6A03G0217100
GO:0016567	protein ubiquitination	0.005305	0.006019	676	25 (3.7%)	TraesCS4B03G0626300;TraesCS3B03G0052700;TraesCS5A03G0516700;TraesCS1B03G0852700;TraesCS6B03G0808400;TraesCS7B03G0277000;TraesCS1D03G0715700;TraesCS5B03G0524900;TraesCS6D03G0848100;TraesCS1A03G0747900;TraesCS7A03G0889900;TraesCS7A03G0289800;TraesCS7A03G0201200;TraesCS3A03G0222600;TraesCS5B03G0566500;TraesCS5D03G0481900;TraesCS4A03G0953200;TraesCS4A03G0953600;TraesCS2D03G1180100;TraesCS7D03G0450700…
GO:0071398	cellular response to fatty acid	0.005465	0.006199	34	4 (11.76%)	TraesCS3A03G0234800;TraesCS6A03G0861500;TraesCS3D03G0225500;TraesCS6B03G1030800
GO:1901002	positive regulation of response to salt stress	0.005465	0.006199	34	4 (11.76%)	TraesCS4D03G0488700;TraesCS3A03G0894700;TraesCS4A03G0218300;TraesCS4B03G0554300
GO:0009908	flower development	0.005518	0.006257	154	9 (5.84%)	TraesCS1A03G0526300;TraesCS6A03G0861500;TraesCS4D03G0488700;TraesCS2B03G0820700;TraesCS6B03G1030800;TraesCS1A03G0655800;TraesCS1D03G0507600;TraesCS4A03G0218300;TraesCS4B03G0554300
GO:0048439	flower morphogenesis	0.006265	0.007103	6	2 (33.33%)	TraesCS1A03G0526300;TraesCS1D03G0507600
GO:0099587	inorganic ion import across plasma membrane	0.006265	0.007103	6	2 (33.33%)	TraesCS2B03G0699900;TraesCS2A03G0606900
GO:0098659	inorganic cation import across plasma membrane	0.006265	0.007103	6	2 (33.33%)	TraesCS2B03G0699900;TraesCS2A03G0606900
GO:0009268	response to pH	0.006265	0.007103	6	2 (33.33%)	TraesCS2B03G1042000;TraesCS2A03G0941300
GO:0080090	regulation of primary metabolic process	0.006412	0.007268	5012	131 (2.61%)	TraesCS6A03G0951400;TraesCS5A03G0669400;TraesCS5B03G0393900;TraesCS1A03G0696200;TraesCS4D03G0435100;TraesCS3B03G0484700;TraesCS4B03G0489100;TraesCS4B03G0712900;TraesCS6B03G0822000;TraesCS2A03G1019200;TraesCS3A03G0830700;TraesCS3D03G0761900;TraesCS4A03G0078800;TraesCS2A03G0999000;TraesCS3A03G0822800;TraesCS4A03G0124800;TraesCS1D03G0166900;TraesCS3A03G0392300;TraesCS5D03G0873200;TraesCS2D03G0353500…
GO:0090567	reproductive shoot system development	0.006763	0.007664	159	9 (5.66%)	TraesCS1A03G0526300;TraesCS6A03G0861500;TraesCS4D03G0488700;TraesCS2B03G0820700;TraesCS6B03G1030800;TraesCS1A03G0655800;TraesCS1D03G0507600;TraesCS4A03G0218300;TraesCS4B03G0554300
GO:0009074	aromatic amino acid family catabolic process	0.006866	0.007779	80	6 (7.5%)	TraesCS1B03G0108400;TraesCS2D03G0459600;TraesCS1D03G0244700;TraesCS1B03G0334900;TraesCS2B03G0540200;TraesCS5B03G1146900
GO:0006970	response to osmotic stress	0.006946	0.007868	249	12 (4.82%)	TraesCS2B03G1042000;TraesCS3A03G0787100;TraesCS3D03G0336300;TraesCS6A03G0861500;TraesCS4D03G0488700;TraesCS6A03G0350400;TraesCS2A03G0941300;TraesCS6B03G1030800;TraesCS4A03G0254600;TraesCS3B03G0906100;TraesCS4A03G0218300;TraesCS4B03G0554300
GO:1901420	negative regulation of response to alcohol	0.00699	0.007915	19	3 (15.79%)	TraesCS3A03G0830700;TraesCS3D03G0761900;TraesCS3B03G0951200
GO:1905958	negative regulation of cellular response to alcohol	0.00699	0.007915	19	3 (15.79%)	TraesCS3A03G0830700;TraesCS3D03G0761900;TraesCS3B03G0951200
GO:0009788	negative regulation of abscisic acid-activated signaling pathway	0.00699	0.007915	19	3 (15.79%)	TraesCS3A03G0830700;TraesCS3D03G0761900;TraesCS3B03G0951200
GO:0120009	intermembrane lipid transfer	0.00699	0.007915	19	3 (15.79%)	TraesCS4A03G0697700;TraesCS4B03G0097800;TraesCS4D03G0080500
GO:0006813	potassium ion transport	0.007035	0.007965	160	9 (5.62%)	TraesCS2A03G0723800;TraesCS2B03G0699900;TraesCS3A03G1035900;TraesCS2A03G0606900;TraesCS6D03G0656800;TraesCS2D03G0667000;TraesCS3B03G1191300;TraesCS2B03G0799700;TraesCS6A03G0775300
GO:0070887	cellular response to chemical stimulus	0.007043	0.007972	656	24 (3.66%)	TraesCS2A03G0801300;TraesCS4A03G0573600;TraesCS7B03G0802400;TraesCS2A03G0416100;TraesCS3B03G0858000;TraesCS1A03G0301300;TraesCS4B03G0228300;TraesCS7A03G0380000;TraesCS6D03G0101500;TraesCS3D03G0691300;TraesCS3D03G0225500;TraesCS6B03G1030800;TraesCS3B03G0796100;TraesCS4A03G0238700;TraesCS3A03G0309300;TraesCS3A03G0234800;TraesCS6A03G0861500;TraesCS2B03G0887400;TraesCS3A03G0230900;TraesCS4D03G0190300…
GO:0009741	response to brassinosteroid	0.007451	0.008431	58	5 (8.62%)	TraesCS2A03G0801300;TraesCS3A03G0309300;TraesCS2B03G0887400;TraesCS3B03G0374100;TraesCS2D03G0741000
GO:1902221	erythrose 4-phosphate/phosphoenolpyruvate family amino acid metabolic process	0.007725	0.00874	82	6 (7.32%)	TraesCS1B03G0108400;TraesCS2D03G0459600;TraesCS1D03G0244700;TraesCS1B03G0334900;TraesCS2B03G0540200;TraesCS5B03G1146900
GO:0006558	L-phenylalanine metabolic process	0.007725	0.00874	82	6 (7.32%)	TraesCS1B03G0108400;TraesCS2D03G0459600;TraesCS1D03G0244700;TraesCS1B03G0334900;TraesCS2B03G0540200;TraesCS5B03G1146900
GO:0046940	nucleoside monophosphate phosphorylation	0.008649	0.009783	7	2 (28.57%)	TraesCS2B03G0452300;TraesCS2A03G0334100
GO:1901419	regulation of response to alcohol	0.008924	0.01	39	4 (10.26%)	TraesCS3A03G0830700;TraesCS3D03G0761900;TraesCS3A03G0894700;TraesCS3B03G0951200
GO:1905957	regulation of cellular response to alcohol	0.008924	0.01	39	4 (10.26%)	TraesCS3A03G0830700;TraesCS3D03G0761900;TraesCS3A03G0894700;TraesCS3B03G0951200
GO:0009787	regulation of abscisic acid-activated signaling pathway	0.008924	0.01	39	4 (10.26%)	TraesCS3A03G0830700;TraesCS3D03G0761900;TraesCS3A03G0894700;TraesCS3B03G0951200
GO:0007165	signal transduction	0.009286	0.01	1278	40 (3.13%)	TraesCS7A03G0425500;TraesCS7B03G0802400;TraesCS2A03G0416100;TraesCS3B03G0858000;TraesCS5D03G0541100;TraesCS3D03G0225500;TraesCS6B03G1030800;TraesCS2D03G0991800;TraesCS2B03G0699900;TraesCS6A03G0861500;TraesCS2B03G0887400;TraesCS3B03G0374100;TraesCS2D03G0741000;TraesCS1B03G0008600;TraesCS4A03G0218300;TraesCS2A03G0801300;TraesCS4A03G0573600;TraesCS1D03G0405400;TraesCS1A03G0301300;TraesCS3A03G0453400…
GO:0009739	response to gibberellin	0.009754	0.01	40	4 (10%)	TraesCS3A03G0830700;TraesCS3D03G0761900;TraesCS6A03G0350400;TraesCS3B03G0951200
GO:0022414	reproductive process	0.01	0.01	1180	37 (3.14%)	TraesCS6A03G0005200;TraesCS2B03G0820700;TraesCS2D03G1127500;TraesCS2A03G1175800;TraesCS3A03G0160300;TraesCS6B03G1030800;TraesCS3B03G0201700;TraesCS4A03G0874000;TraesCS5A03G0388500;TraesCS5B03G1264800;TraesCS1D03G0507600;TraesCS4B03G0129600;TraesCS4A03G0669100;TraesCS6A03G0861500;TraesCS2A03G1242300;TraesCS2B03G0887400;TraesCS5D03G0376900;TraesCS2D03G0095200;TraesCS2D03G0741000;TraesCS1A03G0655800…
GO:0090698	post-embryonic plant morphogenesis	0.01	0.02	68	5 (7.35%)	TraesCS3A03G0787100;TraesCS1A03G0526300;TraesCS1A03G0655800;TraesCS1D03G0507600;TraesCS3B03G0906100
GO:0032446	protein modification by small protein conjugation	0.01	0.01	723	25 (3.46%)	TraesCS4B03G0626300;TraesCS3B03G0052700;TraesCS5A03G0516700;TraesCS1B03G0852700;TraesCS6B03G0808400;TraesCS7B03G0277000;TraesCS1D03G0715700;TraesCS5B03G0524900;TraesCS6D03G0848100;TraesCS1A03G0747900;TraesCS7A03G0889900;TraesCS7A03G0289800;TraesCS7A03G0201200;TraesCS3A03G0222600;TraesCS5B03G0566500;TraesCS5D03G0481900;TraesCS4A03G0953200;TraesCS4A03G0953600;TraesCS2D03G1180100;TraesCS7D03G0450700…
GO:0009063	cellular amino acid catabolic process	0.01	0.02	150	8 (5.33%)	TraesCS1B03G0108400;TraesCS2D03G0459600;TraesCS1D03G0244700;TraesCS1B03G0334900;TraesCS2B03G0540200;TraesCS5B03G1146900;TraesCS7D03G0143500;TraesCS1B03G0644100
GO:1901606	alpha-amino acid catabolic process	0.01	0.01	147	8 (5.44%)	TraesCS1B03G0108400;TraesCS2D03G0459600;TraesCS1D03G0244700;TraesCS1B03G0334900;TraesCS2B03G0540200;TraesCS5B03G1146900;TraesCS7D03G0143500;TraesCS1B03G0644100
GO:0009699	phenylpropanoid biosynthetic process	0.01	0.01	66	5 (7.58%)	TraesCS1B03G0108400;TraesCS2D03G0459600;TraesCS1B03G0334900;TraesCS2B03G0540200;TraesCS5B03G1146900
GO:0009084	glutamine family amino acid biosynthetic process	0.01	0.01	63	5 (7.94%)	TraesCS1B03G0457500;TraesCS3D03G0336300;TraesCS6B03G0928600;TraesCS6A03G0782800;TraesCS6B03G0798100
GO:0098657	import into cell	0.01	0.02	9	2 (22.22%)	TraesCS2B03G0699900;TraesCS2A03G0606900
GO:0098739	import across plasma membrane	0.01	0.01	8	2 (25%)	TraesCS2B03G0699900;TraesCS2A03G0606900
GO:0048827	phyllome development	0.01	0.01	145	8 (5.52%)	TraesCS4A03G0573600;TraesCS3A03G0234800;TraesCS4D03G0488700;TraesCS4B03G0228300;TraesCS4D03G0190300;TraesCS3D03G0225500;TraesCS4A03G0218300;TraesCS4B03G0554300
GO:0019217	regulation of fatty acid metabolic process	0.01	0.01	8	2 (25%)	TraesCS3A03G0787100;TraesCS3B03G0906100
GO:0042304	regulation of fatty acid biosynthetic process	0.01	0.01	8	2 (25%)	TraesCS3A03G0787100;TraesCS3B03G0906100
GO:0047484	regulation of response to osmotic stress	0.01	0.02	44	4 (9.09%)	TraesCS4D03G0488700;TraesCS3A03G0894700;TraesCS4A03G0218300;TraesCS4B03G0554300
GO:1901000	regulation of response to salt stress	0.01	0.01	43	4 (9.3%)	TraesCS4D03G0488700;TraesCS3A03G0894700;TraesCS4A03G0218300;TraesCS4B03G0554300
GO:0006714	sesquiterpenoid metabolic process	0.01	0.01	22	3 (13.64%)	TraesCS6D03G0607800;TraesCS6A03G0725000;TraesCS6B03G0858400
GO:0071702	organic substance transport	0.02	0.02	1835	52 (2.83%)	TraesCS4D03G0590400;TraesCS4D03G0594600;TraesCS2D03G0849600;TraesCS1D03G0710700;TraesCS3A03G0649300;TraesCS7A03G0599900;TraesCS1A03G0530700;TraesCS1D03G0001500;TraesCS1B03G0777100;TraesCS2A03G0468100;TraesCS3A03G0089200;TraesCS5B03G1054800;TraesCS7B03G0399300;TraesCS3A03G0635900;TraesCS1B03G0853300;TraesCS3D03G0104200;TraesCS1B03G0155900;TraesCS2B03G0590200;TraesCS7D03G0811200;TraesCS3D03G0685500…
GO:0009624	response to nematode	0.02	0.02	11	2 (18.18%)	TraesCS1B03G0348200;TraesCS1A03G0268100
GO:0098655	cation transmembrane transport	0.02	0.02	644	22 (3.42%)	TraesCS2A03G0723800;TraesCS1B03G0348200;TraesCS2A03G0415000;TraesCS2D03G0432100;TraesCS1D03G0703400;TraesCS5A03G0919100;TraesCS1A03G0268100;TraesCS2D03G0667000;TraesCS7A03G1017300;TraesCS2A03G1176600;TraesCS4B03G0689300;TraesCS2B03G0699900;TraesCS3A03G1035900;TraesCS4A03G0753300;TraesCS2A03G0606900;TraesCS6D03G0656800;TraesCS7B03G0858100;TraesCS3B03G1191300;TraesCS2B03G0799700;TraesCS6A03G0775300…
GO:0009719	response to endogenous stimulus	0.02	0.02	1022	32 (3.13%)	TraesCS4D03G0024100;TraesCS4D03G0024200;TraesCS2A03G0416100;TraesCS6D03G0101500;TraesCS3D03G0225500;TraesCS6B03G1030800;TraesCS5A03G1074600;TraesCS4A03G0751100;TraesCS3A03G0830700;TraesCS4A03G0751400;TraesCS5B03G1137700;TraesCS6A03G0861500;TraesCS2B03G0887400;TraesCS3D03G0761900;TraesCS3B03G0374100;TraesCS2D03G0741000;TraesCS3B03G0951200;TraesCS2A03G0801300;TraesCS3B03G0207200;TraesCS1A03G0301300…
GO:0009725	response to hormone	0.02	0.02	1021	32 (3.13%)	TraesCS4D03G0024100;TraesCS4D03G0024200;TraesCS2A03G0416100;TraesCS6D03G0101500;TraesCS3D03G0225500;TraesCS6B03G1030800;TraesCS5A03G1074600;TraesCS4A03G0751100;TraesCS3A03G0830700;TraesCS4A03G0751400;TraesCS5B03G1137700;TraesCS6A03G0861500;TraesCS2B03G0887400;TraesCS3D03G0761900;TraesCS3B03G0374100;TraesCS2D03G0741000;TraesCS3B03G0951200;TraesCS2A03G0801300;TraesCS3B03G0207200;TraesCS1A03G0301300…
GO:0042886	amide transport	0.02	0.02	95	6 (6.32%)	TraesCS4A03G0697700;TraesCS4D03G0080500;TraesCS3D03G0104200;TraesCS1B03G0620900;TraesCS1A03G0530700;TraesCS1B03G0777100
GO:0007166	cell surface receptor signaling pathway	0.02	0.02	126	7 (5.56%)	TraesCS2D03G0991800;TraesCS2D03G0421300;TraesCS3A03G0453400;TraesCS4A03G0462400;TraesCS7D03G0183900;TraesCS3B03G0860600;TraesCS1B03G0008600
GO:0009072	aromatic amino acid family metabolic process	0.02	0.02	214	10 (4.67%)	TraesCS1B03G0108400;TraesCS2D03G0459600;TraesCS7A03G1243400;TraesCS7B03G1143000;TraesCS1D03G0244700;TraesCS1B03G0334900;TraesCS5B03G1093500;TraesCS2B03G0540200;TraesCS5B03G1146900;TraesCS5D03G0983900
GO:0019748	secondary metabolic process	0.02	0.03	195	9 (4.62%)	TraesCS1B03G0108400;TraesCS2D03G0459600;TraesCS2D03G0057400;TraesCS4D03G0488700;TraesCS1B03G0334900;TraesCS2B03G0540200;TraesCS5B03G1146900;TraesCS4A03G0218300;TraesCS4B03G0554300
GO:0042537	benzene-containing compound metabolic process	0.02	0.02	71	5 (7.04%)	TraesCS1B03G0108400;TraesCS2D03G0459600;TraesCS1B03G0334900;TraesCS2B03G0540200;TraesCS5B03G1146900
GO:0009608	response to symbiont	0.02	0.02	1	1 (100%)	TraesCS1B03G0708800
GO:0009610	response to symbiotic fungus	0.02	0.02	1	1 (100%)	TraesCS1B03G0708800
GO:0014066	regulation of phosphatidylinositol 3-kinase signaling	0.02	0.02	1	1 (100%)	TraesCS1D03G1014400
GO:0014068	positive regulation of phosphatidylinositol 3-kinase signaling	0.02	0.02	1	1 (100%)	TraesCS1D03G1014400
GO:0048646	anatomical structure formation involved in morphogenesis	0.02	0.02	103	6 (5.83%)	TraesCS3A03G0787100;TraesCS4A03G0573600;TraesCS4B03G0228300;TraesCS4D03G0190300;TraesCS2A03G0077000;TraesCS3B03G0906100
GO:0006207	'de novo' pyrimidine nucleobase biosynthetic process	0.02	0.02	28	3 (10.71%)	TraesCS2B03G0452300;TraesCS3B03G1362600;TraesCS2A03G0334100
GO:0009825	multidimensional cell growth	0.02	0.02	10	2 (20%)	TraesCS2B03G0504800;TraesCS2A03G0379000
GO:0031667	response to nutrient levels	0.02	0.02	99	6 (6.06%)	TraesCS2B03G0699900;TraesCS2B03G1042000;TraesCS2A03G0606900;TraesCS6A03G0861500;TraesCS2A03G0941300;TraesCS6B03G1030800
GO:0009409	response to cold	0.02	0.02	161	8 (4.97%)	TraesCS2B03G1042000;TraesCS3A03G0787100;TraesCS4D03G0488700;TraesCS6A03G0350400;TraesCS2A03G0941300;TraesCS3B03G0906100;TraesCS4A03G0218300;TraesCS4B03G0554300
GO:0009611	response to wounding	0.02	0.02	244	11 (4.51%)	TraesCS2D03G0662000;TraesCS3A03G0787100;TraesCS6A03G0861500;TraesCS4D03G0488700;TraesCS6A03G0350400;TraesCS5A03G0691700;TraesCS6B03G1030800;TraesCS5D03G0913400;TraesCS3B03G0906100;TraesCS4A03G0218300;TraesCS4B03G0554300
GO:0052863	1-deoxy-D-xylulose 5-phosphate metabolic process	0.02	0.02	1	1 (100%)	TraesCS2D03G1324000
GO:0052865	1-deoxy-D-xylulose 5-phosphate biosynthetic process	0.02	0.02	1	1 (100%)	TraesCS2D03G1324000
GO:0009723	response to ethylene	0.02	0.02	72	5 (6.94%)	TraesCS3A03G0787100;TraesCS6A03G0861500;TraesCS6A03G0350400;TraesCS6B03G1030800;TraesCS3B03G0906100
GO:0031335	regulation of sulfur amino acid metabolic process	0.02	0.02	11	2 (18.18%)	TraesCS3A03G0787100;TraesCS3B03G0906100
GO:1900908	regulation of olefin metabolic process	0.02	0.02	11	2 (18.18%)	TraesCS3A03G0787100;TraesCS3B03G0906100
GO:1900911	regulation of olefin biosynthetic process	0.02	0.02	11	2 (18.18%)	TraesCS3A03G0787100;TraesCS3B03G0906100
GO:0010364	regulation of ethylene biosynthetic process	0.02	0.02	11	2 (18.18%)	TraesCS3A03G0787100;TraesCS3B03G0906100
GO:0046620	regulation of organ growth	0.02	0.03	30	3 (10%)	TraesCS3B03G1077200;TraesCS3A03G0944500;TraesCS3D03G0877600
GO:0043090	amino acid import	0.02	0.02	1	1 (100%)	TraesCS3B03G0398000
GO:0051938	L-glutamate import	0.02	0.02	1	1 (100%)	TraesCS3B03G0398000
GO:0042435	indole-containing compound biosynthetic process	0.02	0.03	30	3 (10%)	TraesCS4D03G0488700;TraesCS4A03G0218300;TraesCS4B03G0554300
GO:0009694	jasmonic acid metabolic process	0.02	0.02	26	3 (11.54%)	TraesCS6A03G0861500;TraesCS6B03G1030800;TraesCS5D03G0913400
GO:0060964	regulation of gene silencing by miRNA	0.02	0.02	1	1 (100%)	TraesCS6A03G0149700
GO:1903705	positive regulation of production of siRNA involved in RNA interference	0.02	0.02	1	1 (100%)	TraesCS6A03G0149700
GO:0080186	developmental vegetative growth	0.02	0.02	10	2 (20%)	TraesCS6A03G0861500;TraesCS6B03G1030800
GO:0010035	response to inorganic substance	0.03	0.03	519	18 (3.47%)	TraesCS1B03G0708800;TraesCS5D03G0953200;TraesCS3B03G0207200;TraesCS4D03G0488700;TraesCS6A03G0350400;TraesCS6D03G0101500;TraesCS6B03G1030800;TraesCS3B03G0906100;TraesCS2B03G0699900;TraesCS2B03G1042000;TraesCS3A03G0787100;TraesCS2A03G0606900;TraesCS6A03G0578400;TraesCS7B03G0858100;TraesCS6A03G0861500;TraesCS2A03G0941300;TraesCS4A03G0218300;TraesCS4B03G0554300
GO:1902531	regulation of intracellular signal transduction	0.03	0.04	58	4 (6.9%)	TraesCS4A03G0573600;TraesCS4B03G0228300;TraesCS4D03G0190300;TraesCS1D03G1014400
GO:0019856	pyrimidine nucleobase biosynthetic process	0.03	0.04	33	3 (9.09%)	TraesCS2B03G0452300;TraesCS3B03G1362600;TraesCS2A03G0334100
GO:0035434	copper ion transmembrane transport	0.03	0.03	13	2 (15.38%)	TraesCS2A03G0415000;TraesCS2D03G0432100
GO:0009991	response to extracellular stimulus	0.03	0.04	112	6 (5.36%)	TraesCS2B03G0699900;TraesCS2B03G1042000;TraesCS2A03G0606900;TraesCS6A03G0861500;TraesCS2A03G0941300;TraesCS6B03G1030800
GO:0072662	protein localization to peroxisome	0.03	0.04	34	3 (8.82%)	TraesCS2D03G0849600;TraesCS2B03G0999600;TraesCS2A03G0909900
GO:0072663	establishment of protein localization to peroxisome	0.03	0.04	34	3 (8.82%)	TraesCS2D03G0849600;TraesCS2B03G0999600;TraesCS2A03G0909900
GO:0006625	protein targeting to peroxisome	0.03	0.04	34	3 (8.82%)	TraesCS2D03G0849600;TraesCS2B03G0999600;TraesCS2A03G0909900
GO:0009266	response to temperature stimulus	0.03	0.04	312	12 (3.85%)	TraesCS2B03G1042000;TraesCS5D03G0566700;TraesCS3A03G0787100;TraesCS7B03G0745400;TraesCS4D03G0488700;TraesCS6A03G0350400;TraesCS2A03G0941300;TraesCS6D03G0101500;TraesCS5A03G0601000;TraesCS3B03G0906100;TraesCS4A03G0218300;TraesCS4B03G0554300
GO:0048366	leaf development	0.03	0.03	82	5 (6.1%)	TraesCS4A03G0573600;TraesCS3A03G0234800;TraesCS4B03G0228300;TraesCS4D03G0190300;TraesCS3D03G0225500
GO:0035670	plant-type ovary development	0.03	0.03	31	3 (9.68%)	TraesCS4D03G0488700;TraesCS4A03G0218300;TraesCS4B03G0554300
GO:0048481	plant ovule development	0.03	0.03	31	3 (9.68%)	TraesCS4D03G0488700;TraesCS4A03G0218300;TraesCS4B03G0554300
GO:0009864	induced systemic resistance, jasmonic acid mediated signaling pathway	0.03	0.03	12	2 (16.67%)	TraesCS6A03G0861500;TraesCS6B03G1030800
GO:0033036	macromolecule localization	0.04	0.05	1472	41 (2.79%)	TraesCS4D03G0594600;TraesCS4D03G0080500;TraesCS2D03G0849600;TraesCS7A03G0826200;TraesCS1D03G0710700;TraesCS4B03G0097200;TraesCS3A03G0649300;TraesCS7A03G0599900;TraesCS3B03G0052700;TraesCS1D03G0001500;TraesCS2A03G0468100;TraesCS3A03G0089200;TraesCS5B03G1054800;TraesCS7B03G0399300;TraesCS3A03G0635900;TraesCS1B03G0853300;TraesCS2D03G1258500;TraesCS5A03G1008800;TraesCS7D03G0100600;TraesCS1B03G0155900…
GO:0098662	inorganic cation transmembrane transport	0.04	0.04	613	20 (3.26%)	TraesCS2A03G0723800;TraesCS1B03G0348200;TraesCS2A03G0415000;TraesCS2D03G0432100;TraesCS1D03G0703400;TraesCS5A03G0919100;TraesCS1A03G0268100;TraesCS2D03G0667000;TraesCS7A03G1017300;TraesCS2A03G1176600;TraesCS4B03G0689300;TraesCS2B03G0699900;TraesCS3A03G1035900;TraesCS2A03G0606900;TraesCS6D03G0656800;TraesCS7B03G0858100;TraesCS3B03G1191300;TraesCS2B03G0799700;TraesCS6A03G0775300;TraesCS2B03G1338500
GO:0009755	hormone-mediated signaling pathway	0.04	0.05	394	14 (3.55%)	TraesCS2A03G0801300;TraesCS2A03G0416100;TraesCS1A03G0301300;TraesCS7A03G0380000;TraesCS3D03G0225500;TraesCS6B03G1030800;TraesCS3B03G0796100;TraesCS4A03G0238700;TraesCS3A03G0309300;TraesCS3A03G0234800;TraesCS6A03G0861500;TraesCS2B03G0887400;TraesCS3B03G0374100;TraesCS2D03G0741000
GO:0071705	nitrogen compound transport	0.04	0.04	1451	41 (2.83%)	TraesCS4D03G0590400;TraesCS4D03G0594600;TraesCS4D03G0080500;TraesCS2D03G0849600;TraesCS7A03G0826200;TraesCS1D03G0710700;TraesCS4B03G0097200;TraesCS2D03G1332400;TraesCS3A03G0649300;TraesCS7A03G0599900;TraesCS1A03G0530700;TraesCS3B03G0052700;TraesCS1B03G0777100;TraesCS2A03G0468100;TraesCS5B03G1054800;TraesCS7B03G0399300;TraesCS3A03G0635900;TraesCS6A03G0578400;TraesCS2D03G1258500;TraesCS5A03G1008800…
GO:0016054	organic acid catabolic process	0.04	0.05	217	9 (4.15%)	TraesCS1B03G0108400;TraesCS2D03G0459600;TraesCS1A03G0753800;TraesCS1D03G0244700;TraesCS1B03G0334900;TraesCS2B03G0540200;TraesCS5B03G1146900;TraesCS7D03G0143500;TraesCS1B03G0644100
GO:1901605	alpha-amino acid metabolic process	0.04	0.04	575	19 (3.3%)	TraesCS1B03G0457500;TraesCS1B03G0108400;TraesCS3D03G0336300;TraesCS6B03G0928600;TraesCS2A03G0955200;TraesCS2D03G0459600;TraesCS7B03G1143000;TraesCS1D03G0244700;TraesCS6A03G0782800;TraesCS1B03G0334900;TraesCS5B03G1093500;TraesCS2B03G0540200;TraesCS1B03G0644100;TraesCS7A03G1243400;TraesCS6B03G0798100;TraesCS2D03G0897400;TraesCS5B03G1146900;TraesCS7D03G0143500;TraesCS5D03G0983900
GO:0006206	pyrimidine nucleobase metabolic process	0.04	0.04	36	3 (8.33%)	TraesCS2B03G0452300;TraesCS3B03G1362600;TraesCS2A03G0334100
GO:0043574	peroxisomal transport	0.04	0.05	37	3 (8.11%)	TraesCS2D03G0849600;TraesCS2B03G0999600;TraesCS2A03G0909900
GO:0009188	ribonucleoside diphosphate biosynthetic process	0.04	0.05	2	1 (50%)	TraesCS2B03G0452300
GO:0009193	pyrimidine ribonucleoside diphosphate metabolic process	0.04	0.05	2	1 (50%)	TraesCS2B03G0452300
GO:0009194	pyrimidine ribonucleoside diphosphate biosynthetic process	0.04	0.05	2	1 (50%)	TraesCS2B03G0452300
GO:0046048	UDP metabolic process	0.04	0.05	2	1 (50%)	TraesCS2B03G0452300
GO:0006225	UDP biosynthetic process	0.04	0.05	2	1 (50%)	TraesCS2B03G0452300
GO:0046704	CDP metabolic process	0.04	0.05	2	1 (50%)	TraesCS2B03G0452300
GO:0046705	CDP biosynthetic process	0.04	0.05	2	1 (50%)	TraesCS2B03G0452300
GO:0046777	protein autophosphorylation	0.04	0.04	60	4 (6.67%)	TraesCS6B03G0427800;TraesCS2D03G1258600;TraesCS2D03G1033400;TraesCS3B03G1383600
GO:0015786	UDP-glucose transmembrane transport	0.04	0.05	2	1 (50%)	TraesCS2D03G1332400
GO:0019377	glycolipid catabolic process	0.04	0.05	16	2 (12.5%)	TraesCS7D03G0753800;TraesCS3B03G0904700
GO:0046479	glycosphingolipid catabolic process	0.04	0.05	16	2 (12.5%)	TraesCS7D03G0753800;TraesCS3B03G0904700
GO:0046477	glycosylceramide catabolic process	0.04	0.05	16	2 (12.5%)	TraesCS7D03G0753800;TraesCS3B03G0904700
GO:0006680	glucosylceramide catabolic process	0.04	0.05	16	2 (12.5%)	TraesCS7D03G0753800;TraesCS3B03G0904700
GO:0051851	modulation by host of symbiont process	0.04	0.05	2	1 (50%)	TraesCS3B03G1527500
GO:0044788	modulation by host of viral process	0.04	0.05	2	1 (50%)	TraesCS3B03G1527500
GO:0044794	positive regulation by host of viral process	0.04	0.05	2	1 (50%)	TraesCS3B03G1527500
GO:0002832	negative regulation of response to biotic stimulus	0.04	0.04	15	2 (13.33%)	TraesCS5A03G0576900;TraesCS5D03G0541400
GO:0032102	negative regulation of response to external stimulus	0.04	0.04	15	2 (13.33%)	TraesCS5A03G0576900;TraesCS5D03G0541400
GO:0009682	induced systemic resistance	0.04	0.05	16	2 (12.5%)	TraesCS6A03G0861500;TraesCS6B03G1030800
GO:0010114	response to red light	0.04	0.05	16	2 (12.5%)	TraesCS6A03G0861500;TraesCS6B03G1030800
GO:0010218	response to far red light	0.04	0.04	15	2 (13.33%)	TraesCS6A03G0861500;TraesCS6B03G1030800
GO:0034220	ion transmembrane transport	0.05	0.05	745	23 (3.09%)	TraesCS2A03G0723800;TraesCS1B03G0348200;TraesCS2A03G0415000;TraesCS2D03G0432100;TraesCS1D03G0703400;TraesCS5A03G0919100;TraesCS1A03G0268100;TraesCS2D03G0667000;TraesCS2D03G1332400;TraesCS7A03G1017300;TraesCS2A03G1176600;TraesCS4B03G0689300;TraesCS2B03G0699900;TraesCS3A03G1035900;TraesCS4A03G0753300;TraesCS2A03G0606900;TraesCS6D03G0656800;TraesCS7B03G0858100;TraesCS3B03G1191300;TraesCS2B03G0799700…
GO:0007167	enzyme linked receptor protein signaling pathway	0.05	0.05	39	3 (7.69%)	TraesCS2D03G0421300;TraesCS7D03G0183900;TraesCS3B03G0860600
GO:0007178	transmembrane receptor protein serine/threonine kinase signaling pathway	0.05	0.05	39	3 (7.69%)	TraesCS2D03G0421300;TraesCS7D03G0183900;TraesCS3B03G0860600
GO:0015780	nucleotide-sugar transmembrane transport	0.05	0.05	38	3 (7.89%)	TraesCS4D03G0590400;TraesCS2D03G1332400;TraesCS4A03G0114600
GO:0006074	(1->3)-beta-D-glucan metabolic process	0.05	0.05	39	3 (7.69%)	TraesCS3D03G0578500;TraesCS3B03G0708400;TraesCS3A03G0631500
GO:0006075	(1->3)-beta-D-glucan biosynthetic process	0.05	0.05	39	3 (7.69%)	TraesCS3D03G0578500;TraesCS3B03G0708400;TraesCS3A03G0631500
GO:0048638	regulation of developmental growth	0.05	0.05	93	5 (5.38%)	TraesCS3B03G1077200;TraesCS3A03G0787100;TraesCS3A03G0944500;TraesCS3D03G0877600;TraesCS3B03G0906100
GO:0002252	immune effector process	0.05	0.05	17	2 (11.76%)	TraesCS6A03G0861500;TraesCS6B03G1030800

## Sheet: P0020BP
Gene Count:	689
Background Gene Count:	75477
Ontology:	E:\GOAnalyzer\Deployment\Data\gofiles\go-basic.obo
Annotation:	E:\GOAnalyzer\Deployment\data\gofiles\Gene-GO_association.wheat2022
Hierarchy:	biological_process
Correction:	BH FDR p-value adjustment
Max Path Length From Leaf:	N/A
Min Path Length From Root:	3
GO ID	Description	P-Value	Corrected P-Value	Total Genes	Matched Gene Counts	Matched Genes
GO:0015979	photosynthesis	8.648e-31	9.931e-31	700	52 (7.43%)	TraesCS7A03G0257600;TraesCS2B03G0532800;TraesCS4A03G0878700;TraesCS2A03G0229800;TraesCS7B03G0015200;TraesCS5A03G0640300;TraesCS2B03G0324800;TraesCS1A03G0233400;TraesCS2B03G0839700;TraesCS3A03G0788000;TraesCS5A03G1134200;TraesCS7A03G1001800;TraesCS4D03G0499800;TraesCS2D03G0240900;TraesCS5D03G0512700;TraesCS2A03G0803600;TraesCS5D03G0552200;TraesCS5B03G0665700;TraesCS5B03G1255000;TraesCS5D03G1048100…
GO:0043604	amide biosynthetic process	2.768e-17	3.177e-17	1825	60 (3.29%)	TraesCS5B03G0125200;TraesCS6B03G0816600;TraesCS1A03G0407200;TraesCS4D03G0584200;TraesCS1A03G0994600;TraesCS6A03G0827600;TraesCS5A03G1104100;TraesCS2B03G0677200;TraesCS4B03G0588900;TraesCS5B03G1291400;TraesCS3A03G0528000;TraesCS2D03G0019300;TraesCS3B03G1162300;TraesCS6A03G0660500;TraesCS3A03G0690300;TraesCS7D03G0604200;TraesCS5D03G1060600;TraesCS4B03G0902500;TraesCS6A03G0245900;TraesCS6B03G0515700…
GO:1901566	organonitrogen compound biosynthetic process	1.311e-16	1.505e-16	3496	86 (2.46%)	TraesCS5B03G0125200;TraesCS6B03G0816600;TraesCS1A03G0407200;TraesCS4D03G0584200;TraesCS6D03G0889800;TraesCS1A03G0994600;TraesCS6A03G0827600;TraesCS5A03G1104100;TraesCS2B03G0677200;TraesCS2B03G1322200;TraesCS4B03G0588900;TraesCS5B03G1291400;TraesCS3A03G0528000;TraesCS2D03G0019300;TraesCS3B03G1162300;TraesCS3A03G1066800;TraesCS6A03G0660500;TraesCS1D03G0363400;TraesCS3A03G0690300;TraesCS2A03G1166300…
GO:0006412	translation	1.764e-16	2.024e-16	1733	57 (3.29%)	TraesCS5B03G0125200;TraesCS6B03G0816600;TraesCS1A03G0407200;TraesCS4D03G0584200;TraesCS1A03G0994600;TraesCS6A03G0827600;TraesCS5A03G1104100;TraesCS2B03G0677200;TraesCS4B03G0588900;TraesCS5B03G1291400;TraesCS3A03G0528000;TraesCS3B03G1162300;TraesCS6A03G0660500;TraesCS3A03G0690300;TraesCS7D03G0604200;TraesCS5D03G1060600;TraesCS4B03G0902500;TraesCS6A03G0245900;TraesCS6B03G0515700;TraesCS4D03G0627000…
GO:0043043	peptide biosynthetic process	2.97e-16	3.408e-16	1754	57 (3.25%)	TraesCS5B03G0125200;TraesCS6B03G0816600;TraesCS1A03G0407200;TraesCS4D03G0584200;TraesCS1A03G0994600;TraesCS6A03G0827600;TraesCS5A03G1104100;TraesCS2B03G0677200;TraesCS4B03G0588900;TraesCS5B03G1291400;TraesCS3A03G0528000;TraesCS3B03G1162300;TraesCS6A03G0660500;TraesCS3A03G0690300;TraesCS7D03G0604200;TraesCS5D03G1060600;TraesCS4B03G0902500;TraesCS6A03G0245900;TraesCS6B03G0515700;TraesCS4D03G0627000…
GO:0043603	cellular amide metabolic process	1.498e-15	1.718e-15	2353	66 (2.8%)	TraesCS5B03G0125200;TraesCS6B03G0816600;TraesCS1A03G0407200;TraesCS4D03G0584200;TraesCS1A03G0994600;TraesCS6A03G0827600;TraesCS5A03G1104100;TraesCS2B03G0677200;TraesCS4B03G0588900;TraesCS5B03G1291400;TraesCS3A03G0528000;TraesCS2D03G0019300;TraesCS3B03G1162300;TraesCS6A03G0660500;TraesCS3A03G0690300;TraesCS7D03G0604200;TraesCS5D03G1060600;TraesCS4B03G0902500;TraesCS6A03G0245900;TraesCS6B03G0515700…
GO:0006518	peptide metabolic process	1.934e-15	2.218e-15	2184	63 (2.88%)	TraesCS5B03G0125200;TraesCS6B03G0816600;TraesCS1A03G0407200;TraesCS4D03G0584200;TraesCS1A03G0994600;TraesCS6A03G0827600;TraesCS5A03G1104100;TraesCS2B03G0677200;TraesCS4B03G0588900;TraesCS5B03G1291400;TraesCS3A03G0528000;TraesCS3B03G1162300;TraesCS6A03G0660500;TraesCS3A03G0690300;TraesCS7D03G0604200;TraesCS5D03G1060600;TraesCS4B03G0902500;TraesCS6A03G0245900;TraesCS6B03G0515700;TraesCS4D03G0627000…
GO:0044271	cellular nitrogen compound biosynthetic process	6e-12	6.878e-12	4399	88 (2%)	TraesCS5B03G0125200;TraesCS6B03G0816600;TraesCS1A03G0407200;TraesCS4D03G0584200;TraesCS6D03G0889800;TraesCS1A03G0994600;TraesCS6A03G0827600;TraesCS5A03G1104100;TraesCS2B03G0677200;TraesCS4B03G0588900;TraesCS5B03G1291400;TraesCS3A03G0528000;TraesCS4D03G0207900;TraesCS2D03G0019300;TraesCS3B03G1162300;TraesCS3A03G1066800;TraesCS6A03G0660500;TraesCS3A03G0690300;TraesCS3B03G1030900;TraesCS7D03G0604200…
GO:0019684	photosynthesis, light reaction	1.381e-11	1.582e-11	308	20 (6.49%)	TraesCS7A03G0257600;TraesCS5A03G0584700;TraesCS5D03G0552200;TraesCS2B03G0532800;TraesCS4A03G0059700;TraesCS2D03G0420300;TraesCS2B03G1007000;TraesCS7B03G0015200;TraesCS1A03G0233400;TraesCS7A03G0642100;TraesCS3A03G0788000;TraesCS5A03G0926200;TraesCS7A03G1001800;TraesCS5A03G0549100;TraesCS7D03G0958000;TraesCS5D03G0234500;TraesCS2D03G0467500;TraesCS2D03G0858100;TraesCS5D03G0512700;TraesCS7D03G0237300
GO:1901576	organic substance biosynthetic process	1.397e-09	1.601e-09	7032	114 (1.62%)	TraesCS6D03G0889800;TraesCS1A03G0994600;TraesCS5A03G1104100;TraesCS2B03G0677200;TraesCS5B03G1291400;TraesCS2D03G0019300;TraesCS3B03G1162300;TraesCS6A03G0660500;TraesCS1D03G0363400;TraesCS3A03G0690300;TraesCS2A03G1166300;TraesCS7D03G0604200;TraesCS3B03G0095000;TraesCS6B03G0515700;TraesCS1B03G0812500;TraesCS7D03G1043200;TraesCS2B03G0725100;TraesCS1D03G0681800;TraesCS4A03G0652000;TraesCS1A03G0004000…
GO:0006091	generation of precursor metabolites and energy	6.354e-09	7.278e-09	1002	31 (3.09%)	TraesCS7A03G0257600;TraesCS3D03G0317900;TraesCS2B03G0532800;TraesCS7A03G0847000;TraesCS2B03G1007000;TraesCS3B03G0401400;TraesCS7B03G0015200;TraesCS4B03G0061400;TraesCS1A03G0233400;TraesCS3A03G0788000;TraesCS7A03G1001800;TraesCS3A03G0316700;TraesCS2D03G0019300;TraesCS7B03G0641200;TraesCS2D03G0858100;TraesCS5D03G0512700;TraesCS7B03G0641600;TraesCS7A03G0804400;TraesCS5A03G0584700;TraesCS5D03G0552200…
GO:0044249	cellular biosynthetic process	8.647e-09	9.903e-09	6840	109 (1.59%)	TraesCS6D03G0889800;TraesCS1A03G0994600;TraesCS5A03G1104100;TraesCS2B03G0677200;TraesCS5B03G1291400;TraesCS2D03G0019300;TraesCS3B03G1162300;TraesCS6A03G0660500;TraesCS1D03G0363400;TraesCS3A03G0690300;TraesCS2A03G1166300;TraesCS7D03G0604200;TraesCS3B03G0095000;TraesCS6B03G0515700;TraesCS1B03G0812500;TraesCS7D03G1043200;TraesCS2B03G0725100;TraesCS1D03G0681800;TraesCS4A03G0652000;TraesCS1A03G0004000…
GO:0009058	biosynthetic process	3.338e-08	3.822e-08	7451	114 (1.53%)	TraesCS6D03G0889800;TraesCS1A03G0994600;TraesCS5A03G1104100;TraesCS2B03G0677200;TraesCS5B03G1291400;TraesCS2D03G0019300;TraesCS3B03G1162300;TraesCS6A03G0660500;TraesCS1D03G0363400;TraesCS3A03G0690300;TraesCS2A03G1166300;TraesCS7D03G0604200;TraesCS3B03G0095000;TraesCS6B03G0515700;TraesCS1B03G0812500;TraesCS7D03G1043200;TraesCS2B03G0725100;TraesCS1D03G0681800;TraesCS4A03G0652000;TraesCS1A03G0004000…
GO:0032544	plastid translation	4.693e-08	5.372e-08	12	5 (41.67%)	TraesCS3B03G0531700;TraesCS2D03G0430200;TraesCS7D03G0779600;TraesCSU03G0295800;TraesCS7D03G1043200
GO:0034641	cellular nitrogen compound metabolic process	3.189e-07	3.65e-07	7697	113 (1.47%)	TraesCS5D03G0444000;TraesCS6D03G0889800;TraesCS1A03G0994600;TraesCS5A03G1104100;TraesCS2B03G0677200;TraesCS2A03G1095300;TraesCS7D03G1284700;TraesCS5B03G1291400;TraesCS2D03G0752600;TraesCS2D03G0019300;TraesCS3B03G1162300;TraesCS6A03G0660500;TraesCS3A03G0690300;TraesCS7D03G0604200;TraesCS3A03G0839800;TraesCS3B03G0095000;TraesCS6B03G0515700;TraesCS7A03G1299900;TraesCS1B03G0812500;TraesCS7D03G1043200…
GO:0009765	photosynthesis, light harvesting	3.485e-07	3.987e-07	99	9 (9.09%)	TraesCS5A03G0584700;TraesCS5D03G0552200;TraesCS7A03G1001800;TraesCS2B03G0532800;TraesCS5A03G0549100;TraesCS7D03G0958000;TraesCS2D03G0420300;TraesCS5D03G0512700;TraesCS7A03G0642100
GO:0009059	macromolecule biosynthetic process	4.142e-07	4.738e-07	4487	75 (1.67%)	TraesCS5B03G0125200;TraesCS6B03G0816600;TraesCS1A03G0407200;TraesCS5B03G0664600;TraesCS4D03G0584200;TraesCS1A03G0994600;TraesCS6A03G0827600;TraesCS5A03G1104100;TraesCS2B03G0677200;TraesCS4B03G0588900;TraesCS5B03G1291400;TraesCS3A03G0528000;TraesCS4D03G0207900;TraesCS3B03G1162300;TraesCS6A03G0660500;TraesCS1D03G0363400;TraesCS3A03G0690300;TraesCS3B03G1030900;TraesCS7D03G0604200;TraesCS5D03G1060600…
GO:0015977	carbon fixation	4.188e-07	4.789e-07	51	7 (13.73%)	TraesCS3D03G0317900;TraesCS3A03G0316700;TraesCS2D03G0129100;TraesCS2D03G0129300;TraesCS7A03G0847000;TraesCS3B03G0401400;TraesCS2B03G0179600
GO:0042793	plastid transcription	4.852e-07	5.547e-07	18	5 (27.78%)	TraesCS2B03G1021700;TraesCS3D03G0595600;TraesCS3B03G0733400;TraesCS2D03G0869000;TraesCS3A03G0649600
GO:0034645	cellular macromolecule biosynthetic process	2.096e-06	2.396e-06	4439	72 (1.62%)	TraesCS5B03G0125200;TraesCS6B03G0816600;TraesCS1A03G0407200;TraesCS4D03G0584200;TraesCS1A03G0994600;TraesCS6A03G0827600;TraesCS5A03G1104100;TraesCS2B03G0677200;TraesCS4B03G0588900;TraesCS5B03G1291400;TraesCS3A03G0528000;TraesCS4D03G0207900;TraesCS3B03G1162300;TraesCS6A03G0660500;TraesCS1D03G0363400;TraesCS3A03G0690300;TraesCS3B03G1030900;TraesCS7D03G0604200;TraesCS5D03G1060600;TraesCS4B03G0902500…
GO:0010467	gene expression	7.481e-06	8.549e-06	4862	75 (1.54%)	TraesCS5B03G0125200;TraesCS6B03G0816600;TraesCS1A03G0407200;TraesCS4D03G0584200;TraesCS1A03G0994600;TraesCS6A03G0827600;TraesCS5A03G1104100;TraesCS2B03G0677200;TraesCS4B03G0588900;TraesCS2A03G1095300;TraesCS7D03G1284700;TraesCS5B03G1291400;TraesCS2D03G0752600;TraesCS3A03G0528000;TraesCS4D03G0207900;TraesCS3B03G1162300;TraesCS6A03G0660500;TraesCS3A03G0690300;TraesCS7D03G0604200;TraesCS5D03G1060600…
GO:0006751	glutathione catabolic process	1.903e-05	2.174e-05	18	4 (22.22%)	TraesCS6A03G0152600;TraesCS6B03G0216500;TraesCS2D03G0740600;TraesCS6D03G0136800
GO:0018298	protein-chromophore linkage	1.988e-05	2.27e-05	90	7 (7.78%)	TraesCS5A03G0584700;TraesCS5D03G0552200;TraesCS2B03G0532800;TraesCS5A03G0549100;TraesCS2D03G0420300;TraesCS5D03G0512700;TraesCS7A03G0642100
GO:0006334	nucleosome assembly	2.443e-05	2.79e-05	252	11 (4.37%)	TraesCS5B03G0893500;TraesCS7B03G1062800;TraesCS6B03G0199900;TraesCS5B03G1102900;TraesCS5B03G1099900;TraesCS2D03G0899800;TraesCS5A03G1047100;TraesCS5D03G0989900;TraesCS5A03G1045500;TraesCS1A03G0737200;TraesCS5D03G0991900
GO:0009628	response to abiotic stimulus	2.825e-05	3.226e-05	1079	25 (2.32%)	TraesCS6B03G1261000;TraesCS2B03G1007000;TraesCS2B03G1322200;TraesCS4D03G0257500;TraesCS5B03G0893500;TraesCS3A03G0788000;TraesCS2B03G1021700;TraesCS3B03G0932400;TraesCS4B03G0780900;TraesCS3D03G0404000;TraesCS2D03G0858100;TraesCS5D03G0512700;TraesCS2A03G1166300;TraesCS5A03G0584700;TraesCS2D03G1115800;TraesCS1A03G0737200;TraesCS2D03G0869000;TraesCS5B03G0460200;TraesCS6B03G0199900;TraesCS7B03G0698500…
GO:0043171	peptide catabolic process	2.969e-05	3.389e-05	20	4 (20%)	TraesCS6A03G0152600;TraesCS6B03G0216500;TraesCS2D03G0740600;TraesCS6D03G0136800
GO:0000413	protein peptidyl-prolyl isomerization	3.025e-05	3.452e-05	96	7 (7.29%)	TraesCS3B03G0033200;TraesCS7D03G0399000;TraesCS6B03G0486000;TraesCS6D03G0334000;TraesCS7A03G0679300;TraesCS7D03G0650200;TraesCS4D03G0069000
GO:0034728	nucleosome organization	3.365e-05	3.839e-05	261	11 (4.21%)	TraesCS5B03G0893500;TraesCS7B03G1062800;TraesCS6B03G0199900;TraesCS5B03G1102900;TraesCS5B03G1099900;TraesCS2D03G0899800;TraesCS5A03G1047100;TraesCS5D03G0989900;TraesCS5A03G1045500;TraesCS1A03G0737200;TraesCS5D03G0991900
GO:0031497	chromatin assembly	3.607e-05	4.114e-05	263	11 (4.18%)	TraesCS5B03G0893500;TraesCS7B03G1062800;TraesCS6B03G0199900;TraesCS5B03G1102900;TraesCS5B03G1099900;TraesCS2D03G0899800;TraesCS5A03G1047100;TraesCS5D03G0989900;TraesCS5A03G1045500;TraesCS1A03G0737200;TraesCS5D03G0991900
GO:0009767	photosynthetic electron transport chain	4.122e-05	4.7e-05	137	8 (5.84%)	TraesCS7A03G0257600;TraesCS4A03G0059700;TraesCS2D03G0467500;TraesCS2D03G0858100;TraesCS2B03G1007000;TraesCS7B03G0015200;TraesCS7D03G0237300;TraesCS1A03G0233400
GO:0006333	chromatin assembly or disassembly	4.573e-05	5.214e-05	270	11 (4.07%)	TraesCS5B03G0893500;TraesCS7B03G1062800;TraesCS6B03G0199900;TraesCS5B03G1102900;TraesCS5B03G1099900;TraesCS2D03G0899800;TraesCS5A03G1047100;TraesCS5D03G0989900;TraesCS5A03G1045500;TraesCS1A03G0737200;TraesCS5D03G0991900
GO:0018208	peptidyl-proline modification	4.76e-05	5.425e-05	103	7 (6.8%)	TraesCS3B03G0033200;TraesCS7D03G0399000;TraesCS6B03G0486000;TraesCS6D03G0334000;TraesCS7A03G0679300;TraesCS7D03G0650200;TraesCS4D03G0069000
GO:0043953	protein transport by the Tat complex	6.107e-05	6.959e-05	9	3 (33.33%)	TraesCS7D03G0796000;TraesCS7B03G0669900;TraesCS7A03G0842800
GO:0044273	sulfur compound catabolic process	6.326e-05	7.207e-05	24	4 (16.67%)	TraesCS6A03G0152600;TraesCS6B03G0216500;TraesCS2D03G0740600;TraesCS6D03G0136800
GO:0006323	DNA packaging	7.651e-05	8.714e-05	286	11 (3.85%)	TraesCS5B03G0893500;TraesCS7B03G1062800;TraesCS6B03G0199900;TraesCS5B03G1102900;TraesCS5B03G1099900;TraesCS2D03G0899800;TraesCS5A03G1047100;TraesCS5D03G0989900;TraesCS5A03G1045500;TraesCS1A03G0737200;TraesCS5D03G0991900
GO:0022900	electron transport chain	9.077e-05	0.0001034	453	14 (3.09%)	TraesCS7A03G0257600;TraesCS7A03G0804400;TraesCS4A03G0059700;TraesCS7D03G0765200;TraesCS2B03G1007000;TraesCS7B03G0015200;TraesCS4B03G0061400;TraesCS1A03G0233400;TraesCS7B03G0641200;TraesCS2D03G0467500;TraesCS2D03G0858100;TraesCS2B03G0811700;TraesCS7B03G0641600;TraesCS7D03G0237300
GO:0042219	cellular modified amino acid catabolic process	0.0001022	0.0001164	27	4 (14.81%)	TraesCS6A03G0152600;TraesCS6B03G0216500;TraesCS2D03G0740600;TraesCS6D03G0136800
GO:0010035	response to inorganic substance	0.0001082	0.0001231	519	15 (2.89%)	TraesCS2A03G1166300;TraesCS2D03G1115800;TraesCS2B03G1269400;TraesCS7D03G0199700;TraesCS1A03G0737200;TraesCS2B03G1322200;TraesCS5B03G0460200;TraesCS5B03G0893500;TraesCS6A03G0579100;TraesCS3A03G0788000;TraesCS6B03G0199900;TraesCS7B03G0698500;TraesCS1A03G0765700;TraesCS4B03G0662400;TraesCS4B03G0837800
GO:0006338	chromatin remodeling	0.0001099	0.0001251	298	11 (3.69%)	TraesCS5B03G0893500;TraesCS7B03G1062800;TraesCS6B03G0199900;TraesCS5B03G1102900;TraesCS5B03G1099900;TraesCS2D03G0899800;TraesCS5A03G1047100;TraesCS5D03G0989900;TraesCS5A03G1045500;TraesCS1A03G0737200;TraesCS5D03G0991900
GO:0006438	valyl-tRNA aminoacylation	0.0001183	0.0001346	11	3 (27.27%)	TraesCS2A03G0590900;TraesCS2B03G0677200;TraesCS2D03G0571800
GO:0044237	cellular metabolic process	0.000156	0.0001774	20463	230 (1.12%)	TraesCS2B03G0532800;TraesCS5D03G0444000;TraesCS1A03G0994600;TraesCS2D03G0446700;TraesCS5A03G1104100;TraesCS7D03G0199700;TraesCS2B03G0677200;TraesCS5A03G0640300;TraesCS7D03G1284700;TraesCS5A03G1134200;TraesCS5B03G1291400;TraesCS2D03G0019300;TraesCS3B03G1162300;TraesCS6A03G0660500;TraesCS1D03G0363400;TraesCS5D03G0512700;TraesCS3A03G0690300;TraesCS3B03G0529300;TraesCS2A03G1166300;TraesCS5D03G1048100…
GO:0009416	response to light stimulus	0.0001568	0.0001783	364	12 (3.3%)	TraesCS6B03G1261000;TraesCS2B03G1021700;TraesCS3B03G0932400;TraesCS4B03G0780900;TraesCS5A03G0584700;TraesCS3D03G0404000;TraesCS5A03G0549100;TraesCS5D03G0345600;TraesCS5D03G0512700;TraesCS2D03G0869000;TraesCS4B03G0837800;TraesCS4D03G0257500
GO:0009773	photosynthetic electron transport in photosystem I	0.0001781	0.0002024	31	4 (12.9%)	TraesCS7A03G0257600;TraesCS4A03G0059700;TraesCS7B03G0015200;TraesCS7D03G0237300
GO:0009314	response to radiation	0.0002269	0.0002579	379	12 (3.17%)	TraesCS6B03G1261000;TraesCS2B03G1021700;TraesCS3B03G0932400;TraesCS4B03G0780900;TraesCS5A03G0584700;TraesCS3D03G0404000;TraesCS5A03G0549100;TraesCS5D03G0345600;TraesCS5D03G0512700;TraesCS2D03G0869000;TraesCS4B03G0837800;TraesCS4D03G0257500
GO:0006437	tyrosyl-tRNA aminoacylation	0.0002481	0.0002819	3	2 (66.67%)	TraesCS1A03G0407200;TraesCS1D03G0376300
GO:0043686	co-translational protein modification	0.0002481	0.0002819	3	2 (66.67%)	TraesCS3A03G0528000;TraesCS3D03G0479000
GO:0065004	protein-DNA complex assembly	0.0002517	0.000286	328	11 (3.35%)	TraesCS5B03G0893500;TraesCS7B03G1062800;TraesCS6B03G0199900;TraesCS5B03G1102900;TraesCS5B03G1099900;TraesCS2D03G0899800;TraesCS5A03G1047100;TraesCS5D03G0989900;TraesCS5A03G1045500;TraesCS1A03G0737200;TraesCS5D03G0991900
GO:0005983	starch catabolic process	0.0002558	0.0002905	14	3 (21.43%)	TraesCS1B03G1247100;TraesCS1D03G1012800;TraesCS2A03G0327100
GO:0042373	vitamin K metabolic process	0.0002558	0.0002905	14	3 (21.43%)	TraesCS4A03G1008500;TraesCS2A03G0886700;TraesCS2A03G0892400
GO:0042371	vitamin K biosynthetic process	0.0002558	0.0002905	14	3 (21.43%)	TraesCS4A03G1008500;TraesCS2A03G0886700;TraesCS2A03G0892400
GO:0042374	phylloquinone metabolic process	0.0002558	0.0002905	14	3 (21.43%)	TraesCS4A03G1008500;TraesCS2A03G0886700;TraesCS2A03G0892400
GO:0042372	phylloquinone biosynthetic process	0.0002558	0.0002905	14	3 (21.43%)	TraesCS4A03G1008500;TraesCS2A03G0886700;TraesCS2A03G0892400
GO:0006979	response to oxidative stress	0.0002643	0.0003001	892	20 (2.24%)	TraesCS2B03G0721900;TraesCS2A03G1039900;TraesCS2D03G0977800;TraesCS2B03G0958000;TraesCS2B03G1160400;TraesCS6A03G1030700;TraesCS7A03G0575500;TraesCS7D03G0199700;TraesCS7B03G0147000;TraesCS7D03G1103800;TraesCS7D03G0341000;TraesCS2A03G0219600;TraesCS3A03G0788000;TraesCS6B03G1278500;TraesCS7A03G0352200;TraesCS7D03G0558500;TraesCS6D03G0910500;TraesCS4B03G0662400;TraesCS7B03G0380600;TraesCS6A03G0106300
GO:0006542	glutamine biosynthetic process	0.0003175	0.0003604	15	3 (20%)	TraesCS2A03G1166300;TraesCS2D03G1115800;TraesCS2B03G1322200
GO:0071824	protein-DNA complex subunit organization	0.0003246	0.0003684	338	11 (3.25%)	TraesCS5B03G0893500;TraesCS7B03G1062800;TraesCS6B03G0199900;TraesCS5B03G1102900;TraesCS5B03G1099900;TraesCS2D03G0899800;TraesCS5A03G1047100;TraesCS5D03G0989900;TraesCS5A03G1045500;TraesCS1A03G0737200;TraesCS5D03G0991900
GO:0009657	plastid organization	0.0003663	0.0004156	188	8 (4.26%)	TraesCS3A03G0788000;TraesCS2B03G1021700;TraesCS3B03G0531700;TraesCS2D03G0430200;TraesCS7D03G0779600;TraesCSU03G0295800;TraesCS7D03G1043200;TraesCS2D03G0869000
GO:0006520	cellular amino acid metabolic process	0.000418	0.0004741	1067	22 (2.06%)	TraesCS2A03G1166300;TraesCS2D03G0603200;TraesCS3D03G0068800;TraesCS3B03G0095000;TraesCS2D03G1115800;TraesCS2D03G1290800;TraesCS1A03G0407200;TraesCS5B03G1092400;TraesCS5D03G1101600;TraesCS4B03G0619200;TraesCS1D03G0376300;TraesCS2B03G0677200;TraesCS2B03G1322200;TraesCS2D03G0571800;TraesCS5D03G0823700;TraesCS3A03G0717500;TraesCS3A03G0085500;TraesCS3B03G0932400;TraesCS5B03G0904300;TraesCS2B03G0725100…
GO:0043038	amino acid activation	0.0004568	0.000518	244	9 (3.69%)	TraesCS2D03G0603200;TraesCS5B03G0904300;TraesCS1A03G0407200;TraesCS2B03G0725100;TraesCS1D03G0376300;TraesCS2A03G0590900;TraesCS2B03G0677200;TraesCS2D03G0571800;TraesCS5D03G0823700
GO:0043039	tRNA aminoacylation	0.0004568	0.000518	244	9 (3.69%)	TraesCS2D03G0603200;TraesCS5B03G0904300;TraesCS1A03G0407200;TraesCS2B03G0725100;TraesCS1D03G0376300;TraesCS2A03G0590900;TraesCS2B03G0677200;TraesCS2D03G0571800;TraesCS5D03G0823700
GO:0006325	chromatin organization	0.0004778	0.0005418	354	11 (3.11%)	TraesCS5B03G0893500;TraesCS7B03G1062800;TraesCS6B03G0199900;TraesCS5B03G1102900;TraesCS5B03G1099900;TraesCS2D03G0899800;TraesCS5A03G1047100;TraesCS5D03G0989900;TraesCS5A03G1045500;TraesCS1A03G0737200;TraesCS5D03G0991900
GO:0009853	photorespiration	0.0004846	0.0005494	40	4 (10%)	TraesCS2D03G0129100;TraesCS2D03G0129300;TraesCS2B03G0179600;TraesCS2D03G0580700
GO:0015994	chlorophyll metabolic process	0.000528	0.0005983	72	5 (6.94%)	TraesCS5A03G0855000;TraesCS7D03G0141900;TraesCS6D03G0889800;TraesCS7A03G0154300;TraesCS6B03G1245200
GO:1901607	alpha-amino acid biosynthetic process	0.0005373	0.0006088	303	10 (3.3%)	TraesCS2A03G1166300;TraesCS3A03G0717500;TraesCS3B03G0932400;TraesCS3B03G0095000;TraesCS2D03G1115800;TraesCS2D03G1290800;TraesCS3B03G0822900;TraesCS5D03G1101600;TraesCS4B03G0619200;TraesCS2B03G1322200
GO:0044281	small molecule metabolic process	0.0005525	0.0006258	3180	48 (1.51%)	TraesCS4A03G0652000;TraesCS7A03G0643600;TraesCS2D03G1290800;TraesCS5B03G0387400;TraesCS1A03G0407200;TraesCS7B03G0810500;TraesCS5B03G1092400;TraesCS5D03G1101600;TraesCS1D03G0376300;TraesCS2A03G0892400;TraesCS2B03G0677200;TraesCS2B03G1322200;TraesCS6D03G0533400;TraesCS3A03G0717500;TraesCS7A03G1293800;TraesCS3B03G0932400;TraesCS4B03G0780900;TraesCS5B03G0904300;TraesCS2D03G0019300;TraesCS3A03G1066800…
GO:0006586	indolalkylamine metabolic process	0.0005626	0.0006371	73	5 (6.85%)	TraesCS3D03G0068800;TraesCS3A03G0085500;TraesCS3B03G0095000;TraesCS5B03G1092400;TraesCS5D03G1101600
GO:0006568	tryptophan metabolic process	0.0005626	0.0006371	73	5 (6.85%)	TraesCS3D03G0068800;TraesCS3A03G0085500;TraesCS3B03G0095000;TraesCS5B03G1092400;TraesCS5D03G1101600
GO:0071103	DNA conformation change	0.0006431	0.0007281	367	11 (3%)	TraesCS5B03G0893500;TraesCS7B03G1062800;TraesCS6B03G0199900;TraesCS5B03G1102900;TraesCS5B03G1099900;TraesCS2D03G0899800;TraesCS5A03G1047100;TraesCS5D03G0989900;TraesCS5A03G1045500;TraesCS1A03G0737200;TraesCS5D03G0991900
GO:0015995	chlorophyll biosynthetic process	0.0007622	0.0008627	45	4 (8.89%)	TraesCS7D03G0141900;TraesCS6D03G0889800;TraesCS7A03G0154300;TraesCS6B03G1245200
GO:0006775	fat-soluble vitamin metabolic process	0.000769	0.0008702	20	3 (15%)	TraesCS4A03G1008500;TraesCS2A03G0886700;TraesCS2A03G0892400
GO:0042362	fat-soluble vitamin biosynthetic process	0.000769	0.0008702	20	3 (15%)	TraesCS4A03G1008500;TraesCS2A03G0886700;TraesCS2A03G0892400
GO:0071692	protein localization to extracellular region	0.000769	0.0008702	20	3 (15%)	TraesCS7D03G0796000;TraesCS7B03G0669900;TraesCS7A03G0842800
GO:0035592	establishment of protein localization to extracellular region	0.000769	0.0008702	20	3 (15%)	TraesCS7D03G0796000;TraesCS7B03G0669900;TraesCS7A03G0842800
GO:0009306	protein secretion	0.000769	0.0008702	20	3 (15%)	TraesCS7D03G0796000;TraesCS7B03G0669900;TraesCS7A03G0842800
GO:1901661	quinone metabolic process	0.0008288	0.0009376	46	4 (8.7%)	TraesCS4A03G1008500;TraesCS2A03G0886700;TraesCS2A03G0892400;TraesCS2B03G0823400
GO:0042181	ketone biosynthetic process	0.0008288	0.0009376	46	4 (8.7%)	TraesCS4A03G1008500;TraesCS2A03G0886700;TraesCS2A03G0892400;TraesCS2B03G0823400
GO:1901663	quinone biosynthetic process	0.0008288	0.0009376	46	4 (8.7%)	TraesCS4A03G1008500;TraesCS2A03G0886700;TraesCS2A03G0892400;TraesCS2B03G0823400
GO:0042430	indole-containing compound metabolic process	0.001184	0.001339	86	5 (5.81%)	TraesCS3D03G0068800;TraesCS3A03G0085500;TraesCS3B03G0095000;TraesCS5B03G1092400;TraesCS5D03G1101600
GO:0008652	cellular amino acid biosynthetic process	0.001229	0.00139	338	10 (2.96%)	TraesCS2A03G1166300;TraesCS3A03G0717500;TraesCS3B03G0932400;TraesCS3B03G0095000;TraesCS2D03G1115800;TraesCS2D03G1290800;TraesCS3B03G0822900;TraesCS5D03G1101600;TraesCS4B03G0619200;TraesCS2B03G1322200
GO:0009637	response to blue light	0.001317	0.001489	52	4 (7.69%)	TraesCS3D03G0404000;TraesCS5A03G0549100;TraesCS5D03G0345600;TraesCS5D03G0512700
GO:0044283	small molecule biosynthetic process	0.001464	0.001655	1101	21 (1.91%)	TraesCS2A03G1166300;TraesCS4A03G1008500;TraesCS1B03G0134900;TraesCS3B03G0095000;TraesCS7A03G0643600;TraesCS2D03G1115800;TraesCS2D03G1290800;TraesCS5D03G1101600;TraesCS4B03G0619200;TraesCS2A03G0892400;TraesCS2B03G0823400;TraesCS2B03G1322200;TraesCS3A03G0717500;TraesCS7A03G1293800;TraesCS3B03G0932400;TraesCS4B03G0780900;TraesCS5D03G0255000;TraesCS2A03G0886700;TraesCS3B03G0822900;TraesCS5A03G0242500…
GO:0009768	photosynthesis, light harvesting in photosystem I	0.001684	0.001903	26	3 (11.54%)	TraesCS5A03G0584700;TraesCS5A03G0549100;TraesCS5D03G0512700
GO:0010206	photosystem II repair	0.001695	0.001915	7	2 (28.57%)	TraesCS7A03G1001800;TraesCS7D03G0958000
GO:0006399	tRNA metabolic process	0.001986	0.002243	487	12 (2.46%)	TraesCS2A03G1095300;TraesCS2D03G0603200;TraesCS2A03G0378800;TraesCS3D03G0838400;TraesCS5B03G0904300;TraesCS1A03G0407200;TraesCS2B03G0725100;TraesCS1D03G0376300;TraesCS2A03G0590900;TraesCS2B03G0677200;TraesCS2D03G0571800;TraesCS5D03G0823700
GO:0006778	porphyrin-containing compound metabolic process	0.002106	0.002378	143	6 (4.2%)	TraesCS5A03G0855000;TraesCS7D03G0141900;TraesCS6D03G0889800;TraesCS7A03G0154300;TraesCS6B03G1245200;TraesCS6A03G0252200
GO:0009266	response to temperature stimulus	0.002512	0.002836	312	9 (2.88%)	TraesCS5B03G0460200;TraesCS3A03G0788000;TraesCS2B03G1021700;TraesCS4B03G0780900;TraesCS2D03G0174000;TraesCS2D03G0858100;TraesCS2B03G1007000;TraesCS2D03G0869000;TraesCS4B03G0837800
GO:0006779	porphyrin-containing compound biosynthetic process	0.002623	0.00296	103	5 (4.85%)	TraesCS7D03G0141900;TraesCS6D03G0889800;TraesCS7A03G0154300;TraesCS6B03G1245200;TraesCS6A03G0252200
GO:1901605	alpha-amino acid metabolic process	0.002773	0.003129	575	13 (2.26%)	TraesCS2A03G1166300;TraesCS3D03G0068800;TraesCS3B03G0095000;TraesCS2D03G1115800;TraesCS2D03G1290800;TraesCS5B03G1092400;TraesCS5D03G1101600;TraesCS4B03G0619200;TraesCS2B03G1322200;TraesCS3A03G0717500;TraesCS3A03G0085500;TraesCS3B03G0932400;TraesCS3B03G0822900
GO:0009110	vitamin biosynthetic process	0.003045	0.003435	154	6 (3.9%)	TraesCS4A03G1008500;TraesCS1B03G0134900;TraesCS7A03G0643600;TraesCS2A03G0886700;TraesCS2A03G0892400;TraesCS1D03G0681800
GO:0032890	regulation of organic acid transport	0.003085	0.003479	32	3 (9.38%)	TraesCS6B03G0509800;TraesCS6A03G0420200;TraesCS7D03G1148000
GO:0051952	regulation of amine transport	0.003085	0.003479	32	3 (9.38%)	TraesCS6B03G0509800;TraesCS6A03G0420200;TraesCS7D03G1148000
GO:0051955	regulation of amino acid transport	0.003085	0.003479	32	3 (9.38%)	TraesCS6B03G0509800;TraesCS6A03G0420200;TraesCS7D03G1148000
GO:1903789	regulation of amino acid transmembrane transport	0.003085	0.003479	32	3 (9.38%)	TraesCS6B03G0509800;TraesCS6A03G0420200;TraesCS7D03G1148000
GO:0080143	regulation of amino acid export	0.003085	0.003479	32	3 (9.38%)	TraesCS6B03G0509800;TraesCS6A03G0420200;TraesCS7D03G1148000
GO:0043094	cellular metabolic compound salvage	0.003218	0.003629	108	5 (4.63%)	TraesCS2D03G0129100;TraesCS2D03G0129300;TraesCS1B03G0812500;TraesCS2B03G0179600;TraesCS2D03G0580700
GO:0019752	carboxylic acid metabolic process	0.003447	0.003885	1916	30 (1.57%)	TraesCS7A03G0643600;TraesCS2D03G1290800;TraesCS1A03G0407200;TraesCS5B03G1092400;TraesCS5D03G1101600;TraesCS1D03G0376300;TraesCS2B03G0677200;TraesCS2B03G1322200;TraesCS3A03G0717500;TraesCS7A03G1293800;TraesCS3B03G0932400;TraesCS4B03G0780900;TraesCS5B03G0904300;TraesCS2D03G0019300;TraesCS5A03G0242500;TraesCS2A03G1166300;TraesCS2D03G0603200;TraesCS3D03G0068800;TraesCS1B03G0134900;TraesCS3B03G0095000…
GO:0070681	glutaminyl-tRNAGln biosynthesis via transamidation	0.003567	0.00402	10	2 (20%)	TraesCS2D03G0603200;TraesCS2B03G0725100
GO:0006423	cysteinyl-tRNA aminoacylation	0.003567	0.00402	10	2 (20%)	TraesCS5B03G0904300;TraesCS5D03G0823700
GO:0006766	vitamin metabolic process	0.003673	0.004138	160	6 (3.75%)	TraesCS4A03G1008500;TraesCS1B03G0134900;TraesCS7A03G0643600;TraesCS2A03G0886700;TraesCS2A03G0892400;TraesCS1D03G0681800
GO:0033013	tetrapyrrole metabolic process	0.003673	0.004138	160	6 (3.75%)	TraesCS5A03G0855000;TraesCS7D03G0141900;TraesCS6D03G0889800;TraesCS7A03G0154300;TraesCS6B03G1245200;TraesCS6A03G0252200
GO:0046394	carboxylic acid biosynthetic process	0.003756	0.004231	812	16 (1.97%)	TraesCS2A03G1166300;TraesCS1B03G0134900;TraesCS3B03G0095000;TraesCS7A03G0643600;TraesCS2D03G1115800;TraesCS2D03G1290800;TraesCS5D03G1101600;TraesCS4B03G0619200;TraesCS2B03G1322200;TraesCS3A03G0717500;TraesCS7A03G1293800;TraesCS3B03G0932400;TraesCS4B03G0780900;TraesCS5D03G0255000;TraesCS3B03G0822900;TraesCS5A03G0242500
GO:0043436	oxoacid metabolic process	0.00393	0.004426	1934	30 (1.55%)	TraesCS7A03G0643600;TraesCS2D03G1290800;TraesCS1A03G0407200;TraesCS5B03G1092400;TraesCS5D03G1101600;TraesCS1D03G0376300;TraesCS2B03G0677200;TraesCS2B03G1322200;TraesCS3A03G0717500;TraesCS7A03G1293800;TraesCS3B03G0932400;TraesCS4B03G0780900;TraesCS5B03G0904300;TraesCS2D03G0019300;TraesCS5A03G0242500;TraesCS2A03G1166300;TraesCS2D03G0603200;TraesCS3D03G0068800;TraesCS1B03G0134900;TraesCS3B03G0095000…
GO:0046656	folic acid biosynthetic process	0.004333	0.004879	11	2 (18.18%)	TraesCS1B03G0134900;TraesCS7A03G0643600
GO:0042180	cellular ketone metabolic process	0.005015	0.005646	75	4 (5.33%)	TraesCS4A03G1008500;TraesCS2A03G0886700;TraesCS2A03G0892400;TraesCS2B03G0823400
GO:0006082	organic acid metabolic process	0.005247	0.005905	1975	30 (1.52%)	TraesCS7A03G0643600;TraesCS2D03G1290800;TraesCS1A03G0407200;TraesCS5B03G1092400;TraesCS5D03G1101600;TraesCS1D03G0376300;TraesCS2B03G0677200;TraesCS2B03G1322200;TraesCS3A03G0717500;TraesCS7A03G1293800;TraesCS3B03G0932400;TraesCS4B03G0780900;TraesCS5B03G0904300;TraesCS2D03G0019300;TraesCS5A03G0242500;TraesCS2A03G1166300;TraesCS2D03G0603200;TraesCS3D03G0068800;TraesCS1B03G0134900;TraesCS3B03G0095000…
GO:0033014	tetrapyrrole biosynthetic process	0.005583	0.006282	123	5 (4.07%)	TraesCS7D03G0141900;TraesCS6D03G0889800;TraesCS7A03G0154300;TraesCS6B03G1245200;TraesCS6A03G0252200
GO:0006950	response to stress	0.00583	0.006558	3133	43 (1.37%)	TraesCS2B03G0721900;TraesCS2A03G1039900;TraesCS2D03G0977800;TraesCS5D03G0444000;TraesCS2B03G0958000;TraesCS2B03G1160400;TraesCS7D03G0199700;TraesCS2B03G1007000;TraesCS6D03G0031400;TraesCS2B03G1322200;TraesCS7B03G0147000;TraesCS7D03G1103800;TraesCS5B03G0893500;TraesCS7D03G0341000;TraesCS2A03G0219600;TraesCS3A03G0788000;TraesCS2B03G1021700;TraesCS4B03G0780900;TraesCS6B03G1278500;TraesCS7A03G0352200…
GO:0006418	tRNA aminoacylation for protein translation	0.005908	0.006644	233	7 (3%)	TraesCS5B03G0904300;TraesCS1A03G0407200;TraesCS1D03G0376300;TraesCS2A03G0590900;TraesCS2B03G0677200;TraesCS2D03G0571800;TraesCS5D03G0823700
GO:0009735	response to cytokinin	0.006026	0.006775	79	4 (5.06%)	TraesCS2A03G1166300;TraesCS2D03G1115800;TraesCS3B03G1162300;TraesCS2B03G1322200
GO:0006656	phosphatidylcholine biosynthetic process	0.006072	0.006825	13	2 (15.38%)	TraesCS1A03G0896800;TraesCS1B03G1053700
GO:0010431	seed maturation	0.006072	0.006825	13	2 (15.38%)	TraesCS7D03G0558500;TraesCS7B03G0380600
GO:0010038	response to metal ion	0.006589	0.007405	128	5 (3.91%)	TraesCS2A03G1166300;TraesCS2D03G1115800;TraesCS2B03G1269400;TraesCS2B03G1322200;TraesCS4B03G0837800
GO:0046654	tetrahydrofolate biosynthetic process	0.007041	0.007911	14	2 (14.29%)	TraesCS1B03G0134900;TraesCS7A03G0643600
GO:0016053	organic acid biosynthetic process	0.007257	0.008152	872	16 (1.83%)	TraesCS2A03G1166300;TraesCS1B03G0134900;TraesCS3B03G0095000;TraesCS7A03G0643600;TraesCS2D03G1115800;TraesCS2D03G1290800;TraesCS5D03G1101600;TraesCS4B03G0619200;TraesCS2B03G1322200;TraesCS3A03G0717500;TraesCS7A03G1293800;TraesCS3B03G0932400;TraesCS4B03G0780900;TraesCS5D03G0255000;TraesCS3B03G0822900;TraesCS5A03G0242500
GO:0006535	cysteine biosynthetic process from serine	0.007598	0.008532	44	3 (6.82%)	TraesCS3A03G0717500;TraesCS3B03G0932400;TraesCS3B03G0822900
GO:0010218	response to far red light	0.008075	0.009067	15	2 (13.33%)	TraesCS5A03G0549100;TraesCS5D03G0512700
GO:0030091	protein repair	0.008075	0.009067	15	2 (13.33%)	TraesCS7A03G1001800;TraesCS7D03G0958000
GO:0046686	response to cadmium ion	0.008433	0.009467	87	4 (4.6%)	TraesCS2A03G1166300;TraesCS2D03G1115800;TraesCS2B03G1322200;TraesCS4B03G0837800
GO:0007623	circadian rhythm	0.008592	0.009643	46	3 (6.52%)	TraesCS6B03G1261000;TraesCS3B03G0745800;TraesCS3A03G0656700
GO:0042407	cristae formation	0.009129	0.01	1	1 (100%)	TraesCS5B03G0904300
GO:0046655	folic acid metabolic process	0.009174	0.01	16	2 (12.5%)	TraesCS1B03G0134900;TraesCS7A03G0643600
GO:0010114	response to red light	0.009174	0.01	16	2 (12.5%)	TraesCS5A03G0549100;TraesCS5D03G0512700
GO:0019344	cysteine biosynthetic process	0.009659	0.01	48	3 (6.25%)	TraesCS3A03G0717500;TraesCS3B03G0932400;TraesCS3B03G0822900
GO:0034660	ncRNA metabolic process	0.01	0.01	775	14 (1.81%)	TraesCS1B03G0650600;TraesCS2D03G0603200;TraesCS1A03G0407200;TraesCS2D03G1002600;TraesCS1D03G0376300;TraesCS2B03G0677200;TraesCS2D03G0571800;TraesCS5D03G0823700;TraesCS2A03G1095300;TraesCS2A03G0378800;TraesCS3D03G0838400;TraesCS5B03G0904300;TraesCS2B03G0725100;TraesCS2A03G0590900
GO:0043933	protein-containing complex subunit organization	0.01	0.01	1005	17 (1.69%)	TraesCS7B03G1062800;TraesCS5B03G1102900;TraesCSU03G0295800;TraesCS1A03G0737200;TraesCS5D03G0991900;TraesCS5B03G0893500;TraesCS3A03G0788000;TraesCS6B03G0199900;TraesCS5A03G0926200;TraesCS5B03G1099900;TraesCS4A03G0456500;TraesCS3B03G0805500;TraesCS5D03G0234500;TraesCS2D03G0899800;TraesCS5A03G1047100;TraesCS5D03G0989900;TraesCS5A03G1045500
GO:0034622	cellular protein-containing complex assembly	0.01	0.01	841	15 (1.78%)	TraesCS7B03G1062800;TraesCS5B03G1102900;TraesCS1A03G0737200;TraesCS5D03G0991900;TraesCS5B03G0893500;TraesCS3A03G0788000;TraesCS6B03G0199900;TraesCS5A03G0926200;TraesCS5B03G1099900;TraesCS3B03G0805500;TraesCS5D03G0234500;TraesCS2D03G0899800;TraesCS5A03G1047100;TraesCS5D03G0989900;TraesCS5A03G1045500
GO:0009414	response to water deprivation	0.01	0.02	274	7 (2.55%)	TraesCS5B03G0460200;TraesCS5B03G0893500;TraesCS3A03G0788000;TraesCS6B03G0199900;TraesCS7B03G0698500;TraesCS1A03G0765700;TraesCS1A03G0737200
GO:0044275	cellular carbohydrate catabolic process	0.01	0.02	100	4 (4%)	TraesCS1B03G1247100;TraesCS1D03G1012800;TraesCS7A03G0097100;TraesCS2A03G0327100
GO:0009658	chloroplast organization	0.01	0.01	142	5 (3.52%)	TraesCS3A03G0788000;TraesCS2B03G1021700;TraesCS2D03G0430200;TraesCSU03G0295800;TraesCS2D03G0869000
GO:0006099	tricarboxylic acid cycle	0.01	0.02	101	4 (3.96%)	TraesCS3D03G0317900;TraesCS3A03G0316700;TraesCS7A03G0847000;TraesCS3B03G0401400
GO:0046219	indolalkylamine biosynthetic process	0.01	0.02	20	2 (10%)	TraesCS3B03G0095000;TraesCS5D03G1101600
GO:0000162	tryptophan biosynthetic process	0.01	0.02	20	2 (10%)	TraesCS3B03G0095000;TraesCS5D03G1101600
GO:0009638	phototropism	0.01	0.01	18	2 (11.11%)	TraesCS3D03G0404000;TraesCS5D03G0345600
GO:0098869	cellular oxidant detoxification	0.01	0.01	147	5 (3.4%)	TraesCS6B03G1278500;TraesCS6D03G0910500;TraesCS6A03G1030700;TraesCS4B03G0662400;TraesCS7D03G0199700
GO:0000305	response to oxygen radical	0.01	0.01	19	2 (10.53%)	TraesCS4B03G0662400;TraesCS7D03G0199700
GO:0000303	response to superoxide	0.01	0.01	19	2 (10.53%)	TraesCS4B03G0662400;TraesCS7D03G0199700
GO:0034614	cellular response to reactive oxygen species	0.01	0.01	19	2 (10.53%)	TraesCS4B03G0662400;TraesCS7D03G0199700
GO:0071450	cellular response to oxygen radical	0.01	0.01	19	2 (10.53%)	TraesCS4B03G0662400;TraesCS7D03G0199700
GO:0071451	cellular response to superoxide	0.01	0.01	19	2 (10.53%)	TraesCS4B03G0662400;TraesCS7D03G0199700
GO:0019430	removal of superoxide radicals	0.01	0.01	19	2 (10.53%)	TraesCS4B03G0662400;TraesCS7D03G0199700
GO:0032879	regulation of localization	0.01	0.02	103	4 (3.88%)	TraesCS7B03G0698500;TraesCS6B03G0509800;TraesCS6A03G0420200;TraesCS7D03G1148000
GO:0005975	carbohydrate metabolic process	0.02	0.02	2685	36 (1.34%)	TraesCS3B03G1318800;TraesCS7D03G0848600;TraesCS3B03G1196500;TraesCS5B03G0387400;TraesCS5B03G0664600;TraesCS5A03G0101700;TraesCS5D03G0658800;TraesCS5A03G0927500;TraesCS1A03G0142800;TraesCS6D03G0533400;TraesCS4A03G0099900;TraesCS5B03G0980800;TraesCS1D03G1012800;TraesCS2D03G0019300;TraesCS7B03G0378500;TraesCS3D03G1055100;TraesCS1D03G0130600;TraesCS5A03G0691300;TraesCS2D03G0223800;TraesCS3B03G0672700…
GO:0043067	regulation of programmed cell death	0.02	0.03	26	2 (7.69%)	TraesCS1A03G0706000;TraesCS5B03G0904300
GO:0051276	chromosome organization	0.02	0.02	592	11 (1.86%)	TraesCS5B03G0893500;TraesCS7B03G1062800;TraesCS6B03G0199900;TraesCS5B03G1102900;TraesCS5B03G1099900;TraesCS2D03G0899800;TraesCS5A03G1047100;TraesCS5D03G0989900;TraesCS5A03G1045500;TraesCS1A03G0737200;TraesCS5D03G0991900
GO:0065003	protein-containing complex assembly	0.02	0.02	913	15 (1.64%)	TraesCS7B03G1062800;TraesCS5B03G1102900;TraesCS1A03G0737200;TraesCS5D03G0991900;TraesCS5B03G0893500;TraesCS3A03G0788000;TraesCS6B03G0199900;TraesCS5A03G0926200;TraesCS5B03G1099900;TraesCS3B03G0805500;TraesCS5D03G0234500;TraesCS2D03G0899800;TraesCS5A03G1047100;TraesCS5D03G0989900;TraesCS5A03G1045500
GO:0009415	response to water	0.02	0.03	308	7 (2.27%)	TraesCS5B03G0460200;TraesCS5B03G0893500;TraesCS3A03G0788000;TraesCS6B03G0199900;TraesCS7B03G0698500;TraesCS1A03G0765700;TraesCS1A03G0737200
GO:0009651	response to salt stress	0.02	0.02	217	6 (2.76%)	TraesCS2A03G1166300;TraesCS5B03G0460200;TraesCS3A03G0788000;TraesCS2D03G1115800;TraesCS1A03G0765700;TraesCS2B03G1322200
GO:0009084	glutamine family amino acid biosynthetic process	0.02	0.02	63	3 (4.76%)	TraesCS2A03G1166300;TraesCS2D03G1115800;TraesCS2B03G1322200
GO:0009409	response to cold	0.02	0.02	161	5 (3.11%)	TraesCS5B03G0460200;TraesCS4B03G0780900;TraesCS2D03G0858100;TraesCS2B03G1007000;TraesCS4B03G0837800
GO:0000376	RNA splicing, via transesterification reactions with guanosine as nucleophile	0.02	0.02	2	1 (50%)	TraesCS2D03G0752600
GO:0000372	Group I intron splicing	0.02	0.02	2	1 (50%)	TraesCS2D03G0752600
GO:0000373	Group II intron splicing	0.02	0.03	26	2 (7.69%)	TraesCS7D03G1284700;TraesCS2D03G0752600
GO:0044106	cellular amine metabolic process	0.02	0.02	162	5 (3.09%)	TraesCS3D03G0068800;TraesCS3A03G0085500;TraesCS3B03G0095000;TraesCS5B03G1092400;TraesCS5D03G1101600
GO:0006576	cellular biogenic amine metabolic process	0.02	0.02	162	5 (3.09%)	TraesCS3D03G0068800;TraesCS3A03G0085500;TraesCS3B03G0095000;TraesCS5B03G1092400;TraesCS5D03G1101600
GO:0009953	dorsal/ventral pattern formation	0.02	0.02	2	1 (50%)	TraesCS3B03G0380300
GO:0009799	specification of symmetry	0.02	0.02	2	1 (50%)	TraesCS3B03G0380300
GO:0009855	determination of bilateral symmetry	0.02	0.02	2	1 (50%)	TraesCS3B03G0380300
GO:0048262	determination of dorsal/ventral asymmetry	0.02	0.02	2	1 (50%)	TraesCS3B03G0380300
GO:0048263	determination of dorsal identity	0.02	0.02	2	1 (50%)	TraesCS3B03G0380300
GO:0009636	response to toxic substance	0.02	0.02	167	5 (2.99%)	TraesCS6B03G1278500;TraesCS6D03G0910500;TraesCS6A03G1030700;TraesCS4B03G0662400;TraesCS7D03G0199700
GO:0098754	detoxification	0.02	0.02	157	5 (3.18%)	TraesCS6B03G1278500;TraesCS6D03G0910500;TraesCS6A03G1030700;TraesCS4B03G0662400;TraesCS7D03G0199700
GO:0097237	cellular response to toxic substance	0.02	0.02	157	5 (3.18%)	TraesCS6B03G1278500;TraesCS6D03G0910500;TraesCS6A03G1030700;TraesCS4B03G0662400;TraesCS7D03G0199700
GO:1990748	cellular detoxification	0.02	0.02	157	5 (3.18%)	TraesCS6B03G1278500;TraesCS6D03G0910500;TraesCS6A03G1030700;TraesCS4B03G0662400;TraesCS7D03G0199700
GO:0042440	pigment metabolic process	0.02	0.03	176	5 (2.84%)	TraesCS5A03G0855000;TraesCS7D03G0141900;TraesCS6D03G0889800;TraesCS7A03G0154300;TraesCS6B03G1245200
GO:0034762	regulation of transmembrane transport	0.02	0.02	57	3 (5.26%)	TraesCS6B03G0509800;TraesCS6A03G0420200;TraesCS7D03G1148000
GO:0001101	response to acid chemical	0.03	0.03	312	7 (2.24%)	TraesCS5B03G0460200;TraesCS5B03G0893500;TraesCS3A03G0788000;TraesCS6B03G0199900;TraesCS7B03G0698500;TraesCS1A03G0765700;TraesCS1A03G0737200
GO:0006970	response to osmotic stress	0.03	0.03	249	6 (2.41%)	TraesCS2A03G1166300;TraesCS5B03G0460200;TraesCS3A03G0788000;TraesCS2D03G1115800;TraesCS1A03G0765700;TraesCS2B03G1322200
GO:0006575	cellular modified amino acid metabolic process	0.03	0.03	464	9 (1.94%)	TraesCS6A03G0152600;TraesCS7B03G0253000;TraesCS1B03G0134900;TraesCS6B03G0216500;TraesCS7A03G0643600;TraesCS7D03G0114600;TraesCS2D03G0740600;TraesCS6D03G0136800;TraesCS2B03G1334300
GO:0009396	folic acid-containing compound biosynthetic process	0.03	0.03	29	2 (6.9%)	TraesCS1B03G0134900;TraesCS7A03G0643600
GO:0046653	tetrahydrofolate metabolic process	0.03	0.03	29	2 (6.9%)	TraesCS1B03G0134900;TraesCS7A03G0643600
GO:0043100	pyrimidine nucleobase salvage	0.03	0.03	3	1 (33.33%)	TraesCS1B03G0812500
GO:0046107	uracil biosynthetic process	0.03	0.03	3	1 (33.33%)	TraesCS1B03G0812500
GO:0006223	uracil salvage	0.03	0.03	3	1 (33.33%)	TraesCS1B03G0812500
GO:0005982	starch metabolic process	0.03	0.03	72	3 (4.17%)	TraesCS1B03G1247100;TraesCS1D03G1012800;TraesCS2A03G0327100
GO:0009251	glucan catabolic process	0.03	0.04	75	3 (4%)	TraesCS1B03G1247100;TraesCS1D03G1012800;TraesCS2A03G0327100
GO:0044247	cellular polysaccharide catabolic process	0.03	0.03	73	3 (4.11%)	TraesCS1B03G1247100;TraesCS1D03G1012800;TraesCS2A03G0327100
GO:0042044	fluid transport	0.03	0.03	27	2 (7.41%)	TraesCS2A03G0130000;TraesCS2D03G0860000
GO:0006833	water transport	0.03	0.03	27	2 (7.41%)	TraesCS2A03G0130000;TraesCS2D03G0860000
GO:0006541	glutamine metabolic process	0.03	0.03	73	3 (4.11%)	TraesCS2A03G1166300;TraesCS2D03G1115800;TraesCS2B03G1322200
GO:0032543	mitochondrial translation	0.03	0.04	31	2 (6.45%)	TraesCS2D03G0603200;TraesCS2B03G0725100
GO:0010236	plastoquinone biosynthetic process	0.03	0.03	3	1 (33.33%)	TraesCS2B03G0823400
GO:0006164	purine nucleotide biosynthetic process	0.03	0.03	324	7 (2.16%)	TraesCS4D03G0073100;TraesCS4A03G0652000;TraesCS4A03G0712500;TraesCS2D03G0019300;TraesCS3A03G1066800;TraesCS7D03G0887100;TraesCS4B03G0960100
GO:0009308	amine metabolic process	0.03	0.03	245	6 (2.45%)	TraesCS3D03G0068800;TraesCS3A03G0085500;TraesCS3B03G0095000;TraesCS5B03G1092400;TraesCS5D03G1101600;TraesCS4D03G0667600
GO:0006563	L-serine metabolic process	0.03	0.03	74	3 (4.05%)	TraesCS3A03G0717500;TraesCS3B03G0932400;TraesCS3B03G0822900
GO:0006534	cysteine metabolic process	0.03	0.04	75	3 (4%)	TraesCS3A03G0717500;TraesCS3B03G0932400;TraesCS3B03G0822900
GO:0009070	serine family amino acid biosynthetic process	0.03	0.04	78	3 (3.85%)	TraesCS3A03G0717500;TraesCS3B03G0932400;TraesCS3B03G0822900
GO:0048564	photosystem I assembly	0.03	0.03	28	2 (7.14%)	TraesCS3A03G0788000;TraesCS5D03G0234500
GO:0042435	indole-containing compound biosynthetic process	0.03	0.03	30	2 (6.67%)	TraesCS3B03G0095000;TraesCS5D03G1101600
GO:0080060	integument development	0.03	0.03	3	1 (33.33%)	TraesCS3B03G0380300
GO:0090322	regulation of superoxide metabolic process	0.03	0.03	3	1 (33.33%)	TraesCS3B03G0932400
GO:0006801	superoxide metabolic process	0.03	0.03	28	2 (7.14%)	TraesCS4B03G0662400;TraesCS7D03G0199700
GO:0046176	aldonic acid catabolic process	0.03	0.03	3	1 (33.33%)	TraesCS7A03G0097100
GO:0046177	D-gluconate catabolic process	0.03	0.03	3	1 (33.33%)	TraesCS7A03G0097100
GO:2000071	regulation of defense response by callose deposition	0.03	0.03	3	1 (33.33%)	TraesCS7B03G0698500
GO:0042559	pteridine-containing compound biosynthetic process	0.04	0.05	37	2 (5.41%)	TraesCS1B03G0134900;TraesCS7A03G0643600
GO:0043650	dicarboxylic acid biosynthetic process	0.04	0.04	33	2 (6.06%)	TraesCS1B03G0134900;TraesCS7A03G0643600
GO:0019860	uracil metabolic process	0.04	0.05	5	1 (20%)	TraesCS1B03G0812500
GO:0048830	adventitious root development	0.04	0.04	4	1 (25%)	TraesCS2B03G0852800
GO:0072522	purine-containing compound biosynthetic process	0.04	0.05	349	7 (2.01%)	TraesCS4D03G0073100;TraesCS4A03G0652000;TraesCS4A03G0712500;TraesCS2D03G0019300;TraesCS3A03G1066800;TraesCS7D03G0887100;TraesCS4B03G0960100
GO:0046271	phenylpropanoid catabolic process	0.04	0.05	85	3 (3.53%)	TraesCS3B03G0992200;TraesCS3D03G0795800;TraesCS3A03G0869200
GO:0046274	lignin catabolic process	0.04	0.05	85	3 (3.53%)	TraesCS3B03G0992200;TraesCS3D03G0795800;TraesCS3A03G0869200
GO:0009161	ribonucleoside monophosphate metabolic process	0.04	0.05	84	3 (3.57%)	TraesCS4A03G0712500;TraesCS7B03G0810500;TraesCS4B03G0960100
GO:0009156	ribonucleoside monophosphate biosynthetic process	0.04	0.05	83	3 (3.61%)	TraesCS4A03G0712500;TraesCS7B03G0810500;TraesCS4B03G0960100
GO:0009639	response to red or far red light	0.04	0.05	86	3 (3.49%)	TraesCS5A03G0549100;TraesCS5D03G0512700;TraesCS4D03G0257500
GO:0080148	negative regulation of response to water deprivation	0.04	0.05	5	1 (20%)	TraesCS5B03G0460200
GO:0015833	peptide transport	0.05	0.05	88	3 (3.41%)	TraesCS1B03G0649800;TraesCS1A03G0070900;TraesCS1A03G0556700
GO:0006857	oligopeptide transport	0.05	0.05	88	3 (3.41%)	TraesCS1B03G0649800;TraesCS1A03G0070900;TraesCS1A03G0556700
GO:0009451	RNA modification	0.05	0.05	355	7 (1.97%)	TraesCS2A03G1095300;TraesCS7B03G1217900;TraesCS2A03G0378800;TraesCS2D03G0977900;TraesCS2B03G1157700;TraesCS3B03G0647600;TraesCS7A03G1299900
GO:0009408	response to heat	0.05	0.05	147	4 (2.72%)	TraesCS3A03G0788000;TraesCS2B03G1021700;TraesCS2D03G0174000;TraesCS2D03G0869000
GO:0009072	aromatic amino acid family metabolic process	0.05	0.05	214	5 (2.34%)	TraesCS3D03G0068800;TraesCS3A03G0085500;TraesCS3B03G0095000;TraesCS5B03G1092400;TraesCS5D03G1101600
GO:0000097	sulfur amino acid biosynthetic process	0.05	0.05	90	3 (3.33%)	TraesCS3A03G0717500;TraesCS3B03G0932400;TraesCS3B03G0822900
GO:0006415	translational termination	0.05	0.05	39	2 (5.13%)	TraesCS4A03G0456500;TraesCSU03G0295800
GO:0034599	cellular response to oxidative stress	0.05	0.05	39	2 (5.13%)	TraesCS4B03G0662400;TraesCS7D03G0199700
GO:0045489	pectin biosynthetic process	0.05	0.05	39	2 (5.13%)	TraesCS5B03G0664600;TraesCS5A03G0639300
GO:0051049	regulation of transport	0.05	0.05	90	3 (3.33%)	TraesCS6B03G0509800;TraesCS6A03G0420200;TraesCS7D03G1148000
GO:0046148	pigment biosynthetic process	0.05	0.05	148	4 (2.7%)	TraesCS7D03G0141900;TraesCS6D03G0889800;TraesCS7A03G0154300;TraesCS6B03G1245200
GO:0009845	seed germination	0.05	0.05	39	2 (5.13%)	TraesCS7D03G0558500;TraesCS7B03G0380600

## Sheet: P0100BP
Gene Count:	234
Background Gene Count:	75477
Ontology:	E:\GOAnalyzer\Deployment\Data\gofiles\go-basic.obo
Annotation:	E:\GOAnalyzer\Deployment\data\gofiles\Gene-GO_association.wheat2022
Hierarchy:	biological_process
Correction:	BH FDR p-value adjustment
Max Path Length From Leaf:	N/A
Min Path Length From Root:	3
GO ID	Description	P-Value	Corrected P-Value	Total Genes	Matched Gene Counts	Matched Genes
GO:0110102	ribulose bisphosphate carboxylase complex assembly	9.512e-05	0.0001028	5	2 (40%)	TraesCS5A03G1085400;TraesCS5D03G1037500
GO:0006575	cellular modified amino acid metabolic process	0.0001133	0.0001224	464	8 (1.72%)	TraesCS3D03G0280000;TraesCS2B03G1071900;TraesCS2D03G0080400;TraesCS3A03G0294000;TraesCS3B03G0056000;TraesCS7D03G0100700;TraesCS2D03G0908600;TraesCS3D03G0279900
GO:0043289	apocarotenoid biosynthetic process	0.0001424	0.0001539	6	2 (33.33%)	TraesCS2A03G0784800;TraesCS2D03G0723400
GO:1902645	tertiary alcohol biosynthetic process	0.0001424	0.0001539	6	2 (33.33%)	TraesCS2A03G0784800;TraesCS2D03G0723400
GO:0009688	abscisic acid biosynthetic process	0.0001424	0.0001539	6	2 (33.33%)	TraesCS2A03G0784800;TraesCS2D03G0723400
GO:0009439	cyanate metabolic process	0.0001424	0.0001539	6	2 (33.33%)	TraesCS4A03G0013100;TraesCS4D03G0700800
GO:0006749	glutathione metabolic process	0.0002731	0.000295	399	7 (1.75%)	TraesCS3D03G0280000;TraesCS2B03G1071900;TraesCS2D03G0080400;TraesCS3A03G0294000;TraesCS7D03G0100700;TraesCS2D03G0908600;TraesCS3D03G0279900
GO:0043288	apocarotenoid metabolic process	0.0003396	0.0003668	9	2 (22.22%)	TraesCS2A03G0784800;TraesCS2D03G0723400
GO:1902644	tertiary alcohol metabolic process	0.0003396	0.0003668	9	2 (22.22%)	TraesCS2A03G0784800;TraesCS2D03G0723400
GO:0009687	abscisic acid metabolic process	0.0003396	0.0003668	9	2 (22.22%)	TraesCS2A03G0784800;TraesCS2D03G0723400
GO:0006790	sulfur compound metabolic process	0.0007443	0.0008037	770	9 (1.17%)	TraesCS3D03G0280000;TraesCS2B03G1119500;TraesCS3B03G1202800;TraesCS2B03G1071900;TraesCS2D03G0080400;TraesCS3A03G0294000;TraesCS7D03G0100700;TraesCS2D03G0908600;TraesCS3D03G0279900
GO:0006351	transcription, DNA-templated	0.0008679	0.000937	1683	14 (0.83%)	TraesCS4D03G0705500;TraesCS7A03G0745600;TraesCS7A03G0604100;TraesCS7A03G0411400;TraesCS1A03G1038500;TraesCS2A03G0995100;TraesCS1D03G0590300;TraesCS1D03G0940900;TraesCS7D03G0709800;TraesCS2A03G0773600;TraesCS3B03G0992800;TraesCS2D03G0931400;TraesCS5D03G0012700;TraesCS7B03G0215800
GO:0097659	nucleic acid-templated transcription	0.0008778	0.0009474	1685	14 (0.83%)	TraesCS4D03G0705500;TraesCS7A03G0745600;TraesCS7A03G0604100;TraesCS7A03G0411400;TraesCS1A03G1038500;TraesCS2A03G0995100;TraesCS1D03G0590300;TraesCS1D03G0940900;TraesCS7D03G0709800;TraesCS2A03G0773600;TraesCS3B03G0992800;TraesCS2D03G0931400;TraesCS5D03G0012700;TraesCS7B03G0215800
GO:0032774	RNA biosynthetic process	0.000913	0.0009852	1692	14 (0.83%)	TraesCS4D03G0705500;TraesCS7A03G0745600;TraesCS7A03G0604100;TraesCS7A03G0411400;TraesCS1A03G1038500;TraesCS2A03G0995100;TraesCS1D03G0590300;TraesCS1D03G0940900;TraesCS7D03G0709800;TraesCS2A03G0773600;TraesCS3B03G0992800;TraesCS2D03G0931400;TraesCS5D03G0012700;TraesCS7B03G0215800
GO:0045944	positive regulation of transcription by RNA polymerase II	0.001548	0.00167	267	5 (1.87%)	TraesCS7A03G0411400;TraesCS7D03G0591000;TraesCS7A03G0604100;TraesCS2A03G0773600;TraesCS7B03G0215800
GO:0016106	sesquiterpenoid biosynthetic process	0.001581	0.001705	19	2 (10.53%)	TraesCS2A03G0784800;TraesCS2D03G0723400
GO:0006796	phosphate-containing compound metabolic process	0.001777	0.001916	6989	36 (0.52%)	TraesCS6D03G0650700;TraesCS5D03G0415000;TraesCSU03G0166600;TraesCS6D03G0554400;TraesCS7A03G1315200;TraesCS3A03G0036900;TraesCS7A03G0983600;TraesCS3B03G0923500;TraesCS3D03G1106900;TraesCS7D03G0376400;TraesCS6D03G0310700;TraesCS7B03G0873600;TraesCS1A03G0402900;TraesCS5D03G0889500;TraesCS3B03G1330900;TraesCS3B03G1202800;TraesCS2B03G0831400;TraesCS3B03G0418100;TraesCS7D03G1242100;TraesCS2A03G1242000;…
GO:0006793	phosphorus metabolic process	0.00187	0.002016	7010	36 (0.51%)	TraesCS6D03G0650700;TraesCS5D03G0415000;TraesCSU03G0166600;TraesCS6D03G0554400;TraesCS7A03G1315200;TraesCS3A03G0036900;TraesCS7A03G0983600;TraesCS3B03G0923500;TraesCS3D03G1106900;TraesCS7D03G0376400;TraesCS6D03G0310700;TraesCS7B03G0873600;TraesCS1A03G0402900;TraesCS5D03G0889500;TraesCS3B03G1330900;TraesCS3B03G1202800;TraesCS2B03G0831400;TraesCS3B03G0418100;TraesCS7D03G1242100;TraesCS2A03G1242000;…
GO:0006357	regulation of transcription by RNA polymerase II	0.002019	0.002177	563	7 (1.24%)	TraesCS7A03G0411400;TraesCS7D03G0591000;TraesCS7A03G0604100;TraesCS2A03G0773600;TraesCS1D03G0591900;TraesCS4B03G0943100;TraesCS7B03G0215800
GO:0006714	sesquiterpenoid metabolic process	0.002122	0.002287	22	2 (9.09%)	TraesCS2A03G0784800;TraesCS2D03G0723400
GO:0006721	terpenoid metabolic process	0.002155	0.002322	173	4 (2.31%)	TraesCS2A03G0784800;TraesCS2D03G0723400;TraesCS2D03G0956000;TraesCS3D03G0675100
GO:0018130	heterocycle biosynthetic process	0.004146	0.004466	2659	17 (0.64%)	TraesCS4D03G0705500;TraesCS2B03G1119500;TraesCS7A03G0745600;TraesCS5A03G0900400;TraesCS7A03G0604100;TraesCS7A03G0411400;TraesCS1A03G1038500;TraesCS2A03G0995100;TraesCS3B03G1202800;TraesCS1D03G0590300;TraesCS1D03G0940900;TraesCS7D03G0709800;TraesCS2A03G0773600;TraesCS3B03G0992800;TraesCS2D03G0931400;TraesCS5D03G0012700;TraesCS7B03G0215800
GO:0016101	diterpenoid metabolic process	0.006251	0.006732	38	2 (5.26%)	TraesCS2D03G0956000;TraesCS3D03G0675100
GO:0061077	chaperone-mediated protein folding	0.006251	0.006732	38	2 (5.26%)	TraesCS5A03G1085400;TraesCS5D03G1037500
GO:0044255	cellular lipid metabolic process	0.007166	0.007715	1282	10 (0.78%)	TraesCS2A03G0784800;TraesCS2D03G0723400;TraesCS2D03G0956000;TraesCS3D03G0675100;TraesCS3B03G0056000;TraesCS5A03G0650500;TraesCS1D03G0848200;TraesCS7A03G0983600;TraesCS7D03G0376400;TraesCS2A03G0146700
GO:0120255	olefinic compound biosynthetic process	0.007949	0.008556	43	2 (4.65%)	TraesCS2A03G0784800;TraesCS2D03G0723400
GO:0016310	phosphorylation	0.008137	0.008756	5575	28 (0.5%)	TraesCS6D03G0650700;TraesCSU03G0166600;TraesCS6D03G0554400;TraesCS7A03G1315200;TraesCS3A03G0036900;TraesCS3B03G0923500;TraesCS3D03G1106900;TraesCS6D03G0310700;TraesCS1A03G0402900;TraesCS5D03G0889500;TraesCS3B03G1330900;TraesCS3B03G1202800;TraesCS2B03G0831400;TraesCS3B03G0418100;TraesCS7D03G1242100;TraesCS2A03G1242000;TraesCS3A03G0736500;TraesCSU03G0165900;TraesCS7A03G1033200;TraesCS3A03G0827700;T…
GO:1901362	organic cyclic compound biosynthetic process	0.008798	0.009466	2877	17 (0.59%)	TraesCS4D03G0705500;TraesCS2B03G1119500;TraesCS7A03G0745600;TraesCS5A03G0900400;TraesCS7A03G0604100;TraesCS7A03G0411400;TraesCS1A03G1038500;TraesCS2A03G0995100;TraesCS3B03G1202800;TraesCS1D03G0590300;TraesCS1D03G0940900;TraesCS7D03G0709800;TraesCS2A03G0773600;TraesCS3B03G0992800;TraesCS2D03G0931400;TraesCS5D03G0012700;TraesCS7B03G0215800
GO:0120254	olefinic compound metabolic process	0.009055	0.009741	46	2 (4.35%)	TraesCS2A03G0784800;TraesCS2D03G0723400
GO:0006720	isoprenoid metabolic process	0.009155	0.009846	261	4 (1.53%)	TraesCS2A03G0784800;TraesCS2D03G0723400;TraesCS2D03G0956000;TraesCS3D03G0675100
GO:0006593	ornithine catabolic process	0.009272	0.00997	3	1 (33.33%)	TraesCS5A03G0900400
GO:0009413	response to flooding	0.009272	0.00997	3	1 (33.33%)	TraesCS5A03G0900400
GO:0019544	arginine catabolic process to glutamate	0.009272	0.00997	3	1 (33.33%)	TraesCS5A03G0900400
GO:0006468	protein phosphorylation	0.01	0.01	5255	26 (0.49%)	TraesCS6D03G0650700;TraesCSU03G0166600;TraesCS6D03G0554400;TraesCS7A03G1315200;TraesCS3A03G0036900;TraesCS3B03G0923500;TraesCS3D03G1106900;TraesCS6D03G0310700;TraesCS1A03G0402900;TraesCS5D03G0889500;TraesCS3B03G1330900;TraesCS2B03G0831400;TraesCS3B03G0418100;TraesCS7D03G1242100;TraesCS2A03G1242000;TraesCS3A03G0736500;TraesCSU03G0165900;TraesCS7A03G1033200;TraesCS3A03G0827700;TraesCS3D03G0759500;T…
GO:2001141	regulation of RNA biosynthetic process	0.01	0.02	4290	22 (0.51%)	TraesCS4D03G0705500;TraesCS7D03G0591000;TraesCS2D03G1256000;TraesCS7A03G0604100;TraesCS1A03G0628500;TraesCS7A03G0411400;TraesCS1A03G1038500;TraesCS2A03G0995100;TraesCS4B03G0755800;TraesCS3D03G1067000;TraesCS1D03G0590300;TraesCS5D03G0680800;TraesCS1D03G0940900;TraesCS5A03G0711900;TraesCS3A03G0486500;TraesCS2A03G0238300;TraesCS2A03G0773600;TraesCS1D03G0591900;TraesCS2D03G0931400;TraesCS4B03G0943100…
GO:1903506	regulation of nucleic acid-templated transcription	0.01	0.02	4290	22 (0.51%)	TraesCS4D03G0705500;TraesCS7D03G0591000;TraesCS2D03G1256000;TraesCS7A03G0604100;TraesCS1A03G0628500;TraesCS7A03G0411400;TraesCS1A03G1038500;TraesCS2A03G0995100;TraesCS4B03G0755800;TraesCS3D03G1067000;TraesCS1D03G0590300;TraesCS5D03G0680800;TraesCS1D03G0940900;TraesCS5A03G0711900;TraesCS3A03G0486500;TraesCS2A03G0238300;TraesCS2A03G0773600;TraesCS1D03G0591900;TraesCS2D03G0931400;TraesCS4B03G0943100…
GO:0006355	regulation of transcription, DNA-templated	0.01	0.02	4287	22 (0.51%)	TraesCS4D03G0705500;TraesCS7D03G0591000;TraesCS2D03G1256000;TraesCS7A03G0604100;TraesCS1A03G0628500;TraesCS7A03G0411400;TraesCS1A03G1038500;TraesCS2A03G0995100;TraesCS4B03G0755800;TraesCS3D03G1067000;TraesCS1D03G0590300;TraesCS5D03G0680800;TraesCS1D03G0940900;TraesCS5A03G0711900;TraesCS3A03G0486500;TraesCS2A03G0238300;TraesCS2A03G0773600;TraesCS1D03G0591900;TraesCS2D03G0931400;TraesCS4B03G0943100…
GO:1901700	response to oxygen-containing compound	0.01	0.02	819	7 (0.85%)	TraesCS5A03G0943300;TraesCS3D03G1067000;TraesCS6B03G0794800;TraesCS6D03G0480400;TraesCS5A03G0900400;TraesCS1A03G0631000;TraesCS2D03G0317100
GO:0009741	response to brassinosteroid	0.01	0.02	58	2 (3.45%)	TraesCS5A03G0900400;TraesCS1A03G0631000
GO:0034654	nucleobase-containing compound biosynthetic process	0.01	0.01	2248	14 (0.62%)	TraesCS4D03G0705500;TraesCS7A03G0745600;TraesCS7A03G0604100;TraesCS7A03G0411400;TraesCS1A03G1038500;TraesCS2A03G0995100;TraesCS1D03G0590300;TraesCS1D03G0940900;TraesCS7D03G0709800;TraesCS2A03G0773600;TraesCS3B03G0992800;TraesCS2D03G0931400;TraesCS5D03G0012700;TraesCS7B03G0215800
GO:0006629	lipid metabolic process	0.01	0.01	2008	13 (0.65%)	TraesCS7A03G0983600;TraesCS7B03G0427700;TraesCS7D03G0376400;TraesCS4B03G0547100;TraesCS2A03G0784800;TraesCS2D03G0723400;TraesCS2D03G0956000;TraesCS3D03G0675100;TraesCS3B03G0056000;TraesCS5A03G0650500;TraesCS1D03G0848200;TraesCS5B03G0491400;TraesCS2A03G0146700
GO:1902680	positive regulation of RNA biosynthetic process	0.01	0.01	432	5 (1.16%)	TraesCS7A03G0411400;TraesCS7D03G0591000;TraesCS7A03G0604100;TraesCS2A03G0773600;TraesCS7B03G0215800
GO:1903508	positive regulation of nucleic acid-templated transcription	0.01	0.01	432	5 (1.16%)	TraesCS7A03G0411400;TraesCS7D03G0591000;TraesCS7A03G0604100;TraesCS2A03G0773600;TraesCS7B03G0215800
GO:0045893	positive regulation of transcription, DNA-templated	0.01	0.01	432	5 (1.16%)	TraesCS7A03G0411400;TraesCS7D03G0591000;TraesCS7A03G0604100;TraesCS2A03G0773600;TraesCS7B03G0215800
GO:0006066	alcohol metabolic process	0.01	0.01	159	3 (1.89%)	TraesCS2A03G0784800;TraesCS2D03G0723400;TraesCS3B03G1202800
GO:0016114	terpenoid biosynthetic process	0.01	0.01	147	3 (2.04%)	TraesCS2A03G0784800;TraesCS2D03G0723400;TraesCS2D03G0956000
GO:0009448	gamma-aminobutyric acid metabolic process	0.01	0.01	4	1 (25%)	TraesCS2B03G1119500
GO:0006285	base-excision repair, AP site formation	0.01	0.01	4	1 (25%)	TraesCS4B03G0188100
GO:0015977	carbon fixation	0.01	0.01	51	2 (3.92%)	TraesCS5A03G1085400;TraesCS5D03G1037500
GO:0044237	cellular metabolic process	0.02	0.02	20463	78 (0.38%)	TraesCS1A03G0929500;TraesCS6D03G0480400;TraesCS5D03G0415000;TraesCS6D03G0554400;TraesCS3A03G0036900;TraesCS7A03G0604100;TraesCS3B03G0923500;TraesCS3D03G1106900;TraesCS7D03G0376400;TraesCS1A03G0402900;TraesCS3A03G0030800;TraesCS2A03G0784800;TraesCS3D03G0784700;TraesCS5D03G0889500;TraesCS3B03G0227300;TraesCS3B03G1202800;TraesCS2B03G1071900;TraesCS2A03G0773600;TraesCS5D03G1037500;TraesCS7D03G1242100…
GO:0019219	regulation of nucleobase-containing compound metabolic process	0.02	0.02	4433	22 (0.5%)	TraesCS4D03G0705500;TraesCS7D03G0591000;TraesCS2D03G1256000;TraesCS7A03G0604100;TraesCS1A03G0628500;TraesCS7A03G0411400;TraesCS1A03G1038500;TraesCS2A03G0995100;TraesCS4B03G0755800;TraesCS3D03G1067000;TraesCS1D03G0590300;TraesCS5D03G0680800;TraesCS1D03G0940900;TraesCS5A03G0711900;TraesCS3A03G0486500;TraesCS2A03G0238300;TraesCS2A03G0773600;TraesCS1D03G0591900;TraesCS2D03G0931400;TraesCS4B03G0943100…
GO:0051252	regulation of RNA metabolic process	0.02	0.02	4387	22 (0.5%)	TraesCS4D03G0705500;TraesCS7D03G0591000;TraesCS2D03G1256000;TraesCS7A03G0604100;TraesCS1A03G0628500;TraesCS7A03G0411400;TraesCS1A03G1038500;TraesCS2A03G0995100;TraesCS4B03G0755800;TraesCS3D03G1067000;TraesCS1D03G0590300;TraesCS5D03G0680800;TraesCS1D03G0940900;TraesCS5A03G0711900;TraesCS3A03G0486500;TraesCS2A03G0238300;TraesCS2A03G0773600;TraesCS1D03G0591900;TraesCS2D03G0931400;TraesCS4B03G0943100…
GO:0019438	aromatic compound biosynthetic process	0.02	0.02	2655	15 (0.56%)	TraesCS4D03G0705500;TraesCS7A03G0745600;TraesCS7A03G0604100;TraesCS7A03G0411400;TraesCS1A03G1038500;TraesCS2A03G0995100;TraesCS3B03G1202800;TraesCS1D03G0590300;TraesCS1D03G0940900;TraesCS7D03G0709800;TraesCS2A03G0773600;TraesCS3B03G0992800;TraesCS2D03G0931400;TraesCS5D03G0012700;TraesCS7B03G0215800
GO:0006644	phospholipid metabolic process	0.02	0.02	471	5 (1.06%)	TraesCS3B03G0056000;TraesCS5A03G0650500;TraesCS1D03G0848200;TraesCS7A03G0983600;TraesCS7D03G0376400
GO:0009891	positive regulation of biosynthetic process	0.02	0.02	478	5 (1.05%)	TraesCS7A03G0411400;TraesCS7D03G0591000;TraesCS7A03G0604100;TraesCS2A03G0773600;TraesCS7B03G0215800
GO:0010557	positive regulation of macromolecule biosynthetic process	0.02	0.02	468	5 (1.07%)	TraesCS7A03G0411400;TraesCS7D03G0591000;TraesCS7A03G0604100;TraesCS2A03G0773600;TraesCS7B03G0215800
GO:0031328	positive regulation of cellular biosynthetic process	0.02	0.02	474	5 (1.05%)	TraesCS7A03G0411400;TraesCS7D03G0591000;TraesCS7A03G0604100;TraesCS2A03G0773600;TraesCS7B03G0215800
GO:0045935	positive regulation of nucleobase-containing compound metabolic process	0.02	0.02	471	5 (1.06%)	TraesCS7A03G0411400;TraesCS7D03G0591000;TraesCS7A03G0604100;TraesCS2A03G0773600;TraesCS7B03G0215800
GO:0051254	positive regulation of RNA metabolic process	0.02	0.02	465	5 (1.08%)	TraesCS7A03G0411400;TraesCS7D03G0591000;TraesCS7A03G0604100;TraesCS2A03G0773600;TraesCS7B03G0215800
GO:0046165	alcohol biosynthetic process	0.02	0.02	71	2 (2.82%)	TraesCS2A03G0784800;TraesCS2D03G0723400
GO:0006768	biotin metabolic process	0.02	0.03	8	1 (12.5%)	TraesCS2B03G1119500
GO:0009102	biotin biosynthetic process	0.02	0.03	8	1 (12.5%)	TraesCS2B03G1119500
GO:0010035	response to inorganic substance	0.02	0.03	519	5 (0.96%)	TraesCS5A03G0943300;TraesCS6B03G0794800;TraesCS6D03G0480400;TraesCS5A03G0900400;TraesCS2D03G0317100
GO:0006658	phosphatidylserine metabolic process	0.02	0.02	6	1 (16.67%)	TraesCS3B03G0056000
GO:0006659	phosphatidylserine biosynthetic process	0.02	0.02	6	1 (16.67%)	TraesCS3B03G0056000
GO:0051014	actin filament severing	0.02	0.02	7	1 (14.29%)	TraesCS4D03G0394100
GO:0051646	mitochondrion localization	0.02	0.02	6	1 (16.67%)	TraesCS5A03G0900400
GO:0002213	defense response to insect	0.02	0.03	8	1 (12.5%)	TraesCS7B03G0427700
GO:0050789	regulation of biological process	0.03	0.03	7510	33 (0.44%)	TraesCS6B03G0931500;TraesCS7A03G0604100;TraesCS7A03G0411400;TraesCS2A03G0995100;TraesCS3D03G1067000;TraesCS2A03G0439800;TraesCS1D03G0590300;TraesCS5D03G0680800;TraesCS1D03G0940900;TraesCS3A03G0486500;TraesCS2A03G0238300;TraesCS2A03G0773600;TraesCS4D03G0394100;TraesCS4B03G0943100;TraesCS7B03G0215800;TraesCS4D03G0675600;TraesCS4D03G0705500;TraesCS7D03G0591000;TraesCS2D03G1256000;TraesCS3A03G0736500…
GO:0010468	regulation of gene expression	0.03	0.03	4846	23 (0.47%)	TraesCS4D03G0705500;TraesCS7D03G0591000;TraesCS2D03G1256000;TraesCS6B03G0931500;TraesCS7A03G0604100;TraesCS1A03G0628500;TraesCS7A03G0411400;TraesCS1A03G1038500;TraesCS2A03G0995100;TraesCS4B03G0755800;TraesCS3D03G1067000;TraesCS1D03G0590300;TraesCS5D03G0680800;TraesCS1D03G0940900;TraesCS5A03G0711900;TraesCS3A03G0486500;TraesCS2A03G0238300;TraesCS2A03G0773600;TraesCS1D03G0591900;TraesCS2D03G0931400…
GO:0009889	regulation of biosynthetic process	0.03	0.03	4605	22 (0.48%)	TraesCS4D03G0705500;TraesCS7D03G0591000;TraesCS2D03G1256000;TraesCS7A03G0604100;TraesCS1A03G0628500;TraesCS7A03G0411400;TraesCS1A03G1038500;TraesCS2A03G0995100;TraesCS4B03G0755800;TraesCS3D03G1067000;TraesCS1D03G0590300;TraesCS5D03G0680800;TraesCS1D03G0940900;TraesCS5A03G0711900;TraesCS3A03G0486500;TraesCS2A03G0238300;TraesCS2A03G0773600;TraesCS1D03G0591900;TraesCS2D03G0931400;TraesCS4B03G0943100…
GO:0010556	regulation of macromolecule biosynthetic process	0.03	0.03	4551	22 (0.48%)	TraesCS4D03G0705500;TraesCS7D03G0591000;TraesCS2D03G1256000;TraesCS7A03G0604100;TraesCS1A03G0628500;TraesCS7A03G0411400;TraesCS1A03G1038500;TraesCS2A03G0995100;TraesCS4B03G0755800;TraesCS3D03G1067000;TraesCS1D03G0590300;TraesCS5D03G0680800;TraesCS1D03G0940900;TraesCS5A03G0711900;TraesCS3A03G0486500;TraesCS2A03G0238300;TraesCS2A03G0773600;TraesCS1D03G0591900;TraesCS2D03G0931400;TraesCS4B03G0943100…
GO:0031326	regulation of cellular biosynthetic process	0.03	0.03	4599	22 (0.48%)	TraesCS4D03G0705500;TraesCS7D03G0591000;TraesCS2D03G1256000;TraesCS7A03G0604100;TraesCS1A03G0628500;TraesCS7A03G0411400;TraesCS1A03G1038500;TraesCS2A03G0995100;TraesCS4B03G0755800;TraesCS3D03G1067000;TraesCS1D03G0590300;TraesCS5D03G0680800;TraesCS1D03G0940900;TraesCS5A03G0711900;TraesCS3A03G0486500;TraesCS2A03G0238300;TraesCS2A03G0773600;TraesCS1D03G0591900;TraesCS2D03G0931400;TraesCS4B03G0943100…
GO:2000112	regulation of cellular macromolecule biosynthetic process	0.03	0.03	4546	22 (0.48%)	TraesCS4D03G0705500;TraesCS7D03G0591000;TraesCS2D03G1256000;TraesCS7A03G0604100;TraesCS1A03G0628500;TraesCS7A03G0411400;TraesCS1A03G1038500;TraesCS2A03G0995100;TraesCS4B03G0755800;TraesCS3D03G1067000;TraesCS1D03G0590300;TraesCS5D03G0680800;TraesCS1D03G0940900;TraesCS5A03G0711900;TraesCS3A03G0486500;TraesCS2A03G0238300;TraesCS2A03G0773600;TraesCS1D03G0591900;TraesCS2D03G0931400;TraesCS4B03G0943100…
GO:0016311	dephosphorylation	0.03	0.04	392	4 (1.02%)	TraesCS5D03G0415000;TraesCS1D03G0848200;TraesCS1D03G0591900;TraesCS7B03G0873600
GO:0008299	isoprenoid biosynthetic process	0.03	0.04	229	3 (1.31%)	TraesCS2A03G0784800;TraesCS2D03G0723400;TraesCS2D03G0956000
GO:0042357	thiamine diphosphate metabolic process	0.03	0.03	10	1 (10%)	TraesCS3B03G1202800
GO:0009229	thiamine diphosphate biosynthetic process	0.03	0.03	10	1 (10%)	TraesCS3B03G1202800
GO:0055129	L-proline biosynthetic process	0.03	0.04	11	1 (9.09%)	TraesCS5A03G0900400
GO:0000038	very long-chain fatty acid metabolic process	0.03	0.03	10	1 (10%)	TraesCS7A03G0983600
GO:0071704	organic substance metabolic process	0.04	0.05	22718	83 (0.37%)	TraesCS6D03G0480400;TraesCS6D03G0554400;TraesCS3A03G0036900;TraesCS7A03G0604100;TraesCS3B03G0923500;TraesCS3D03G1106900;TraesCS7D03G0376400;TraesCS1A03G0402900;TraesCS3A03G0030800;TraesCS2A03G0784800;TraesCS5D03G0889500;TraesCS3B03G0227300;TraesCS3B03G1202800;TraesCS2B03G1071900;TraesCS4B03G0920700;TraesCS5B03G0491400;TraesCS2A03G0773600;TraesCS5D03G1037500;TraesCS7D03G1242100;TraesCS3D03G0100300…
GO:0060255	regulation of macromolecule metabolic process	0.04	0.04	5293	24 (0.45%)	TraesCS4D03G0705500;TraesCS7D03G0591000;TraesCS2D03G1256000;TraesCS6B03G0931500;TraesCS7A03G0604100;TraesCS1A03G0628500;TraesCS7A03G0411400;TraesCS1A03G1038500;TraesCS2A03G0995100;TraesCS7B03G0862000;TraesCS4B03G0755800;TraesCS3D03G1067000;TraesCS1D03G0590300;TraesCS5D03G0680800;TraesCS1D03G0940900;TraesCS5A03G0711900;TraesCS3A03G0486500;TraesCS2A03G0238300;TraesCS2A03G0773600;TraesCS1D03G0591900…
GO:0050794	regulation of cellular process	0.04	0.04	6861	30 (0.44%)	TraesCS7A03G0604100;TraesCS7A03G0411400;TraesCS2A03G0995100;TraesCS3D03G1067000;TraesCS2A03G0439800;TraesCS1D03G0590300;TraesCS5D03G0680800;TraesCS1D03G0940900;TraesCS3A03G0486500;TraesCS2A03G0238300;TraesCS2A03G0773600;TraesCS4D03G0394100;TraesCS4B03G0943100;TraesCS7B03G0215800;TraesCS4D03G0675600;TraesCS4D03G0705500;TraesCS7D03G0591000;TraesCS2D03G1256000;TraesCS3A03G0736500;TraesCS4B03G0547100…
GO:0051171	regulation of nitrogen compound metabolic process	0.04	0.04	4980	23 (0.46%)	TraesCS4D03G0705500;TraesCS7D03G0591000;TraesCS2D03G1256000;TraesCS7A03G0604100;TraesCS1A03G0628500;TraesCS7A03G0411400;TraesCS1A03G1038500;TraesCS2A03G0995100;TraesCS7B03G0862000;TraesCS4B03G0755800;TraesCS3D03G1067000;TraesCS1D03G0590300;TraesCS5D03G0680800;TraesCS1D03G0940900;TraesCS5A03G0711900;TraesCS3A03G0486500;TraesCS2A03G0238300;TraesCS2A03G0773600;TraesCS1D03G0591900;TraesCS2D03G0931400…
GO:0080090	regulation of primary metabolic process	0.04	0.04	5012	23 (0.46%)	TraesCS4D03G0705500;TraesCS7D03G0591000;TraesCS2D03G1256000;TraesCS7A03G0604100;TraesCS1A03G0628500;TraesCS7A03G0411400;TraesCS1A03G1038500;TraesCS2A03G0995100;TraesCS7B03G0862000;TraesCS4B03G0755800;TraesCS3D03G1067000;TraesCS1D03G0590300;TraesCS5D03G0680800;TraesCS1D03G0940900;TraesCS5A03G0711900;TraesCS3A03G0486500;TraesCS2A03G0238300;TraesCS2A03G0773600;TraesCS1D03G0591900;TraesCS2D03G0931400…
GO:0009893	positive regulation of metabolic process	0.04	0.05	615	5 (0.81%)	TraesCS7A03G0411400;TraesCS7D03G0591000;TraesCS7A03G0604100;TraesCS2A03G0773600;TraesCS7B03G0215800
GO:0010604	positive regulation of macromolecule metabolic process	0.04	0.04	599	5 (0.83%)	TraesCS7A03G0411400;TraesCS7D03G0591000;TraesCS7A03G0604100;TraesCS2A03G0773600;TraesCS7B03G0215800
GO:0031325	positive regulation of cellular metabolic process	0.04	0.04	592	5 (0.84%)	TraesCS7A03G0411400;TraesCS7D03G0591000;TraesCS7A03G0604100;TraesCS2A03G0773600;TraesCS7B03G0215800
GO:0051173	positive regulation of nitrogen compound metabolic process	0.04	0.04	584	5 (0.86%)	TraesCS7A03G0411400;TraesCS7D03G0591000;TraesCS7A03G0604100;TraesCS2A03G0773600;TraesCS7B03G0215800
GO:0010193	response to ozone	0.04	0.04	13	1 (7.69%)	TraesCS2D03G0317100
GO:0008654	phospholipid biosynthetic process	0.04	0.05	251	3 (1.2%)	TraesCS3B03G0056000;TraesCS5A03G0650500;TraesCS7D03G0376400
GO:0016042	lipid catabolic process	0.04	0.04	239	3 (1.26%)	TraesCS3D03G0675100;TraesCS7B03G0427700;TraesCS4B03G0547100
GO:0016115	terpenoid catabolic process	0.04	0.05	14	1 (7.14%)	TraesCS3D03G0675100
GO:0016103	diterpenoid catabolic process	0.04	0.05	14	1 (7.14%)	TraesCS3D03G0675100
GO:0045487	gibberellin catabolic process	0.04	0.05	14	1 (7.14%)	TraesCS3D03G0675100
GO:0051693	actin filament capping	0.04	0.04	12	1 (8.33%)	TraesCS4D03G0394100
GO:2000012	regulation of auxin polar transport	0.04	0.04	13	1 (7.69%)	TraesCS4D03G0394100
GO:0006591	ornithine metabolic process	0.04	0.05	14	1 (7.14%)	TraesCS5A03G0900400
GO:0015706	nitrate transport	0.04	0.04	13	1 (7.69%)	TraesCS6D03G0480400
GO:0007165	signal transduction	0.05	0.05	1278	8 (0.63%)	TraesCS3A03G0827700;TraesCS3D03G0759500;TraesCS3B03G0843100;TraesCS3D03G1067000;TraesCS1D03G0940900;TraesCS3A03G0736500;TraesCS4B03G0547100;TraesCS6D03G0142300
GO:0006082	organic acid metabolic process	0.05	0.05	1975	11 (0.56%)	TraesCS2A03G0784800;TraesCS2D03G0723400;TraesCS2B03G1119500;TraesCS3D03G0675100;TraesCS6D03G0480400;TraesCS4A03G0013100;TraesCS5A03G0900400;TraesCS7A03G0983600;TraesCS2A03G0146700;TraesCS2D03G0866000;TraesCS4D03G0700800
GO:0010496	intercellular transport	0.05	0.05	15	1 (6.67%)	TraesCS3B03G1352600
GO:0010497	plasmodesmata-mediated intercellular transport	0.05	0.05	15	1 (6.67%)	TraesCS3B03G1352600
GO:0071370	cellular response to gibberellin stimulus	0.05	0.05	16	1 (6.25%)	TraesCS3D03G1067000
GO:0010476	gibberellin mediated signaling pathway	0.05	0.05	16	1 (6.25%)	TraesCS3D03G1067000
GO:0009740	gibberellic acid mediated signaling pathway	0.05	0.05	15	1 (6.67%)	TraesCS3D03G1067000
GO:1901879	regulation of protein depolymerization	0.05	0.05	16	1 (6.25%)	TraesCS4D03G0394100
GO:0030834	regulation of actin filament depolymerization	0.05	0.05	16	1 (6.25%)	TraesCS4D03G0394100
GO:1901880	negative regulation of protein depolymerization	0.05	0.05	15	1 (6.67%)	TraesCS4D03G0394100
GO:0030835	negative regulation of actin filament depolymerization	0.05	0.05	15	1 (6.67%)	TraesCS4D03G0394100
GO:0031333	negative regulation of protein-containing complex assembly	0.05	0.05	15	1 (6.67%)	TraesCS4D03G0394100
GO:0032272	negative regulation of protein polymerization	0.05	0.05	15	1 (6.67%)	TraesCS4D03G0394100
GO:0030837	negative regulation of actin filament polymerization	0.05	0.05	15	1 (6.67%)	TraesCS4D03G0394100
GO:0006527	arginine catabolic process	0.05	0.05	16	1 (6.25%)	TraesCS5A03G0900400
GO:0042538	hyperosmotic salinity response	0.05	0.05	15	1 (6.67%)	TraesCS5A03G0900400
GO:0006561	proline biosynthetic process	0.05	0.05	15	1 (6.67%)	TraesCS5A03G0900400
GO:0010167	response to nitrate	0.05	0.05	16	1 (6.25%)	TraesCS6D03G0480400

## Sheet: P0200BP
Gene Count:	353
Background Gene Count:	75477
Ontology:	E:\GOAnalyzer\Deployment\Data\gofiles\go-basic.obo
Annotation:	E:\GOAnalyzer\Deployment\data\gofiles\Gene-GO_association.wheat2022
Hierarchy:	biological_process
Correction:	BH FDR p-value adjustment
Max Path Length From Leaf:	N/A
Min Path Length From Root:	3
GO ID	Description	P-Value	Corrected P-Value	Total Genes	Matched Gene Counts	Matched Genes
GO:0048598	embryonic morphogenesis	4.043e-07	4.489e-07	4	3 (75%)	TraesCS3A03G0312100;TraesCS3B03G0370200;TraesCS3D03G0289600
GO:0048826	cotyledon morphogenesis	4.043e-07	4.489e-07	4	3 (75%)	TraesCS3A03G0312100;TraesCS3B03G0370200;TraesCS3D03G0289600
GO:0010588	cotyledon vascular tissue pattern formation	4.043e-07	4.489e-07	4	3 (75%)	TraesCS3A03G0312100;TraesCS3B03G0370200;TraesCS3D03G0289600
GO:0010016	shoot system morphogenesis	3.877e-06	4.303e-06	50	5 (10%)	TraesCS3A03G0312100;TraesCS3B03G0370200;TraesCS3D03G0289600;TraesCS7B03G0019600;TraesCS7A03G0262100
GO:0010305	leaf vascular tissue pattern formation	8.345e-06	9.26e-06	9	3 (33.33%)	TraesCS3A03G0312100;TraesCS3B03G0370200;TraesCS3D03G0289600
GO:0005975	carbohydrate metabolic process	1.236e-05	1.371e-05	2685	30 (1.12%)	TraesCS5B03G0123100;TraesCS3B03G1196400;TraesCS4B03G0301000;TraesCS2A03G0193500;TraesCS6B03G0801800;TraesCS2D03G0366700;TraesCS6B03G1090700;TraesCS5D03G0627300;TraesCS4A03G1016800;TraesCS6D03G0598000;TraesCS5B03G0159600;TraesCS2B03G1501600;TraesCS2D03G0869600;TraesCS7D03G0035800;TraesCS7A03G0040100;TraesCS5B03G0692600;TraesCS4A03G0170100;TraesCS3A03G0883700;TraesCS7A03G1148400;TraesCS5D03G1216600…
GO:0010087	phloem or xylem histogenesis	1.339e-05	1.486e-05	31	4 (12.9%)	TraesCS2B03G1252900;TraesCS3A03G0312100;TraesCS3B03G0370200;TraesCS3D03G0289600
GO:1900865	chloroplast RNA modification	1.628e-05	1.805e-05	11	3 (27.27%)	TraesCS3A03G0312100;TraesCS3B03G0370200;TraesCS3D03G0289600
GO:0048825	cotyledon development	2.163e-05	2.398e-05	12	3 (25%)	TraesCS3A03G0312100;TraesCS3B03G0370200;TraesCS3D03G0289600
GO:0009965	leaf morphogenesis	2.802e-05	3.105e-05	13	3 (23.08%)	TraesCS3A03G0312100;TraesCS3B03G0370200;TraesCS3D03G0289600
GO:0010051	xylem and phloem pattern formation	4.427e-05	4.905e-05	15	3 (20%)	TraesCS3A03G0312100;TraesCS3B03G0370200;TraesCS3D03G0289600
GO:0000165	MAPK cascade	7.856e-05	8.704e-05	18	3 (16.67%)	TraesCS7A03G0995000;TraesCS7B03G0831100;TraesCS7D03G0951500
GO:0010187	negative regulation of seed germination	0.0001301	0.0001441	4	2 (50%)	TraesCS7B03G0019600;TraesCS7A03G0262100
GO:1900140	regulation of seedling development	0.0003386	0.000375	29	3 (10.34%)	TraesCS5B03G1217900;TraesCS7B03G0019600;TraesCS7A03G0262100
GO:0010029	regulation of seed germination	0.0003386	0.000375	29	3 (10.34%)	TraesCS5B03G1217900;TraesCS7B03G0019600;TraesCS7A03G0262100
GO:0042335	cuticle development	0.000451	0.0004993	7	2 (28.57%)	TraesCS7B03G0019600;TraesCS7A03G0262100
GO:1901668	regulation of superoxide dismutase activity	0.0007684	0.0008504	9	2 (22.22%)	TraesCS5A03G0550000;TraesCS7D03G0366000
GO:1901671	positive regulation of superoxide dismutase activity	0.0007684	0.0008504	9	2 (22.22%)	TraesCS5A03G0550000;TraesCS7D03G0366000
GO:0009934	regulation of meristem structural organization	0.0009575	0.00106	10	2 (20%)	TraesCS7B03G0019600;TraesCS7A03G0262100
GO:0003002	regionalization	0.001017	0.001125	42	3 (7.14%)	TraesCS3A03G0312100;TraesCS3B03G0370200;TraesCS3D03G0289600
GO:0048581	negative regulation of post-embryonic development	0.001017	0.001125	42	3 (7.14%)	TraesCS7B03G0019600;TraesCS7A03G0262100;TraesCS4A03G0164900
GO:2000026	regulation of multicellular organismal development	0.001543	0.001707	177	5 (2.82%)	TraesCS3B03G0967400;TraesCS5B03G1217900;TraesCS7B03G0019600;TraesCS7A03G0262100;TraesCS4A03G0164900
GO:0048580	regulation of post-embryonic development	0.001543	0.001707	177	5 (2.82%)	TraesCS3B03G0967400;TraesCS5B03G1217900;TraesCS7B03G0019600;TraesCS7A03G0262100;TraesCS4A03G0164900
GO:0009793	embryo development ending in seed dormancy	0.001829	0.002022	184	5 (2.72%)	TraesCS3A03G0312100;TraesCS5B03G1217900;TraesCS3B03G0370200;TraesCS5B03G0760100;TraesCS3D03G0289600
GO:0009790	embryo development	0.001962	0.002169	187	5 (2.67%)	TraesCS3A03G0312100;TraesCS5B03G1217900;TraesCS3B03G0370200;TraesCS5B03G0760100;TraesCS3D03G0289600
GO:0007389	pattern specification process	0.001998	0.002209	53	3 (5.66%)	TraesCS3A03G0312100;TraesCS3B03G0370200;TraesCS3D03G0289600
GO:0051353	positive regulation of oxidoreductase activity	0.0022	0.002431	15	2 (13.33%)	TraesCS5A03G0550000;TraesCS7D03G0366000
GO:0009926	auxin polar transport	0.0022	0.002431	15	2 (13.33%)	TraesCS7B03G0019600;TraesCS7A03G0262100
GO:0051241	negative regulation of multicellular organismal process	0.002716	0.003001	59	3 (5.08%)	TraesCS7B03G0019600;TraesCS7A03G0262100;TraesCS4A03G0164900
GO:0042793	plastid transcription	0.003176	0.003508	18	2 (11.11%)	TraesCS1D03G1003400;TraesCS3D03G0796400
GO:0019566	arabinose metabolic process	0.003176	0.003508	18	2 (11.11%)	TraesCS7A03G0978800;TraesCS4B03G0301000
GO:0046373	L-arabinose metabolic process	0.003176	0.003508	18	2 (11.11%)	TraesCS7A03G0978800;TraesCS4B03G0301000
GO:0051093	negative regulation of developmental process	0.003422	0.003779	64	3 (4.69%)	TraesCS7B03G0019600;TraesCS7A03G0262100;TraesCS4A03G0164900
GO:0051341	regulation of oxidoreductase activity	0.003539	0.003907	19	2 (10.53%)	TraesCS5A03G0550000;TraesCS7D03G0366000
GO:0090698	post-embryonic plant morphogenesis	0.00406	0.004481	68	3 (4.41%)	TraesCS3A03G0312100;TraesCS3B03G0370200;TraesCS3D03G0289600
GO:1902584	positive regulation of response to water deprivation	0.004319	0.004766	21	2 (9.52%)	TraesCS7B03G0019600;TraesCS7A03G0262100
GO:0051239	regulation of multicellular organismal process	0.004409	0.004864	226	5 (2.21%)	TraesCS3B03G0967400;TraesCS5B03G1217900;TraesCS7B03G0019600;TraesCS7A03G0262100;TraesCS4A03G0164900
GO:0048316	seed development	0.004575	0.005046	228	5 (2.19%)	TraesCS3A03G0312100;TraesCS5B03G1217900;TraesCS3B03G0370200;TraesCS5B03G0760100;TraesCS3D03G0289600
GO:0055085	transmembrane transport	0.005366	0.005917	3222	26 (0.81%)	TraesCS2D03G0709100;TraesCS7B03G0254600;TraesCS7B03G0772800;TraesCS1D03G1000900;TraesCS6B03G0761200;TraesCS2A03G0392600;TraesCS7B03G0839200;TraesCS2B03G0395600;TraesCS3A03G0876800;TraesCS4A03G1016800;TraesCS1B03G1236400;TraesCS2D03G0307900;TraesCS4D03G0799400;TraesCS4B03G0767200;TraesCS4D03G0688500;TraesCS6D03G0183600;TraesCS7D03G0268500;TraesCS2B03G0690200;TraesCS6B03G0821200;TraesCS5B03G0349100…
GO:0010154	fruit development	0.005376	0.005927	237	5 (2.11%)	TraesCS3A03G0312100;TraesCS5B03G1217900;TraesCS3B03G0370200;TraesCS5B03G0760100;TraesCS3D03G0289600
GO:0009914	hormone transport	0.005624	0.006199	24	2 (8.33%)	TraesCS7B03G0019600;TraesCS7A03G0262100
GO:0060918	auxin transport	0.005624	0.006199	24	2 (8.33%)	TraesCS7B03G0019600;TraesCS7A03G0262100
GO:1901700	response to oxygen-containing compound	0.005697	0.006278	819	10 (1.22%)	TraesCS1A03G0514200;TraesCS5B03G1217900;TraesCS5A03G0438600;TraesCS2D03G0481700;TraesCS7B03G0900400;TraesCS1B03G0870100;TraesCS7B03G0019600;TraesCS6B03G0173000;TraesCS2B03G1233700;TraesCS7A03G0262100
GO:2000070	regulation of response to water deprivation	0.006582	0.007251	26	2 (7.69%)	TraesCS7B03G0019600;TraesCS7A03G0262100
GO:0048366	leaf development	0.006838	0.007532	82	3 (3.66%)	TraesCS3A03G0312100;TraesCS3B03G0370200;TraesCS3D03G0289600
GO:0050793	regulation of developmental process	0.007617	0.008387	363	6 (1.65%)	TraesCS3B03G0967400;TraesCS5B03G1217900;TraesCS1D03G0512000;TraesCS7B03G0019600;TraesCS7A03G0262100;TraesCS4A03G0164900
GO:0048367	shoot system development	0.008116	0.008935	262	5 (1.91%)	TraesCS3A03G0312100;TraesCS3B03G0370200;TraesCS3D03G0289600;TraesCS7B03G0019600;TraesCS7A03G0262100
GO:0009964	negative regulation of flavonoid biosynthetic process	0.009332	0.01	2	1 (50%)	TraesCS3D03G0764100
GO:0098755	maintenance of seed dormancy by absisic acid	0.009332	0.01	2	1 (50%)	TraesCS5B03G1217900
GO:0033993	response to lipid	0.01	0.01	399	6 (1.5%)	TraesCS1A03G0514200;TraesCS5B03G1217900;TraesCS5A03G0438600;TraesCS7B03G0900400;TraesCS1B03G0870100;TraesCS2B03G1233700
GO:0071396	cellular response to lipid	0.01	0.01	192	4 (2.08%)	TraesCS1A03G0514200;TraesCS5A03G0438600;TraesCS1B03G0870100;TraesCS2B03G1233700
GO:0097306	cellular response to alcohol	0.01	0.01	105	3 (2.86%)	TraesCS1A03G0514200;TraesCS1B03G0870100;TraesCS2B03G1233700
GO:0071215	cellular response to abscisic acid stimulus	0.01	0.01	105	3 (2.86%)	TraesCS1A03G0514200;TraesCS1B03G0870100;TraesCS2B03G1233700
GO:0009738	abscisic acid-activated signaling pathway	0.01	0.01	97	3 (3.09%)	TraesCS1A03G0514200;TraesCS1B03G0870100;TraesCS2B03G1233700
GO:0005996	monosaccharide metabolic process	0.01	0.01	292	5 (1.71%)	TraesCS7B03G0600400;TraesCS7A03G0978800;TraesCS4B03G0301000;TraesCS2A03G0193500;TraesCS2D03G0193800
GO:0006260	DNA replication	0.01	0.01	281	5 (1.78%)	TraesCS2D03G0831300;TraesCS3A03G0596000;TraesCS3D03G0550800;TraesCS5A03G0905200;TraesCS4A03G0621000
GO:1901657	glycosyl compound metabolic process	0.01	0.01	99	3 (3.03%)	TraesCS3A03G0359000;TraesCS6D03G0509900;TraesCS3D03G0347400
GO:0009116	nucleoside metabolic process	0.01	0.01	96	3 (3.12%)	TraesCS3A03G0359000;TraesCS6D03G0509900;TraesCS3D03G0347400
GO:0019321	pentose metabolic process	0.01	0.01	34	2 (5.88%)	TraesCS7A03G0978800;TraesCS4B03G0301000
GO:0006821	chloride transport	0.01	0.01	34	2 (5.88%)	TraesCS6B03G0314900;TraesCS6D03G0183600
GO:0006722	triterpenoid metabolic process	0.01	0.01	36	2 (5.56%)	TraesCS6D03G0213300;TraesCS6D03G0213700
GO:0016104	triterpenoid biosynthetic process	0.01	0.01	36	2 (5.56%)	TraesCS6D03G0213300;TraesCS6D03G0213700
GO:0042254	ribosome biogenesis	0.02	0.02	447	6 (1.34%)	TraesCS1A03G0147100;TraesCS1D03G0951000;TraesCS2B03G0912100;TraesCS2B03G1148900;TraesCS2D03G1269200;TraesCS7A03G1300000
GO:0007165	signal transduction	0.02	0.02	1278	12 (0.94%)	TraesCS7A03G0995000;TraesCS5D03G0876900;TraesCS1A03G0514200;TraesCS5A03G0576600;TraesCS1B03G0870100;TraesCS2D03G0433200;TraesCS7B03G0831100;TraesCS5D03G0362000;TraesCS6D03G0529100;TraesCS7D03G0951500;TraesCS1D03G0164800;TraesCS2B03G1233700
GO:0009635	response to herbicide	0.02	0.03	5	1 (20%)	TraesCS1D03G0462000
GO:0006012	galactose metabolic process	0.02	0.02	43	2 (4.65%)	TraesCS2A03G0193500;TraesCS2D03G0193800
GO:0009888	tissue development	0.02	0.02	220	4 (1.82%)	TraesCS2B03G1252900;TraesCS3A03G0312100;TraesCS3B03G0370200;TraesCS3D03G0289600
GO:0009620	response to fungus	0.02	0.02	127	3 (2.36%)	TraesCS2B03G1453900;TraesCS2D03G0061200;TraesCS2B03G1453800
GO:0050832	defense response to fungus	0.02	0.02	115	3 (2.61%)	TraesCS2B03G1453900;TraesCS2D03G0061200;TraesCS2B03G1453800
GO:0006272	leading strand elongation	0.02	0.02	4	1 (25%)	TraesCS2D03G0831300
GO:0009653	anatomical structure morphogenesis	0.02	0.02	311	5 (1.61%)	TraesCS3A03G0312100;TraesCS3B03G0370200;TraesCS3D03G0289600;TraesCS7B03G0019600;TraesCS7A03G0262100
GO:1901661	quinone metabolic process	0.02	0.02	46	2 (4.35%)	TraesCS3D03G0567300;TraesCS7D03G0732500
GO:0042181	ketone biosynthetic process	0.02	0.02	46	2 (4.35%)	TraesCS3D03G0567300;TraesCS7D03G0732500
GO:1901663	quinone biosynthetic process	0.02	0.02	46	2 (4.35%)	TraesCS3D03G0567300;TraesCS7D03G0732500
GO:0009962	regulation of flavonoid biosynthetic process	0.02	0.02	4	1 (25%)	TraesCS3D03G0764100
GO:2000242	negative regulation of reproductive process	0.02	0.02	40	2 (5%)	TraesCS4A03G0164900;TraesCS5B03G0284000
GO:0051447	negative regulation of meiotic cell cycle	0.02	0.03	5	1 (20%)	TraesCS5B03G0284000
GO:0045835	negative regulation of meiotic nuclear division	0.02	0.03	5	1 (20%)	TraesCS5B03G0284000
GO:0045128	negative regulation of reciprocal meiotic recombination	0.02	0.02	4	1 (25%)	TraesCS5B03G0284000
GO:0097437	maintenance of dormancy	0.02	0.03	5	1 (20%)	TraesCS5B03G1217900
GO:0010231	maintenance of seed dormancy	0.02	0.03	5	1 (20%)	TraesCS5B03G1217900
GO:1901701	cellular response to oxygen-containing compound	0.03	0.03	249	4 (1.61%)	TraesCS1A03G0514200;TraesCS5A03G0438600;TraesCS1B03G0870100;TraesCS2B03G1233700
GO:0035556	intracellular signal transduction	0.03	0.03	499	6 (1.2%)	TraesCS7A03G0995000;TraesCS2D03G0433200;TraesCS7B03G0831100;TraesCS6D03G0529100;TraesCS7D03G0951500;TraesCS1D03G0164800
GO:0009658	chloroplast organization	0.03	0.03	142	3 (2.11%)	TraesCS1D03G1003400;TraesCS1D03G0512000;TraesCS3D03G0796400
GO:0010817	regulation of hormone levels	0.03	0.03	144	3 (2.08%)	TraesCS2D03G0146000;TraesCS7B03G0019600;TraesCS7A03G0262100
GO:1905392	plant organ morphogenesis	0.03	0.03	135	3 (2.22%)	TraesCS3A03G0312100;TraesCS3B03G0370200;TraesCS3D03G0289600
GO:0048827	phyllome development	0.03	0.03	145	3 (2.07%)	TraesCS3A03G0312100;TraesCS3B03G0370200;TraesCS3D03G0289600
GO:0009233	menaquinone metabolic process	0.03	0.03	6	1 (16.67%)	TraesCS3D03G0567300
GO:0009234	menaquinone biosynthetic process	0.03	0.03	6	1 (16.67%)	TraesCS3D03G0567300
GO:0017062	respiratory chain complex III assembly	0.03	0.03	6	1 (16.67%)	TraesCS3D03G1186400
GO:0034551	mitochondrial respiratory chain complex III assembly	0.03	0.03	6	1 (16.67%)	TraesCS3D03G1186400
GO:0070542	response to fatty acid	0.03	0.04	62	2 (3.23%)	TraesCS5A03G0438600;TraesCS7B03G0900400
GO:0009753	response to jasmonic acid	0.03	0.04	61	2 (3.28%)	TraesCS5A03G0438600;TraesCS7B03G0900400
GO:0010520	regulation of reciprocal meiotic recombination	0.03	0.03	6	1 (16.67%)	TraesCS5B03G0284000
GO:0022611	dormancy process	0.03	0.03	6	1 (16.67%)	TraesCS5B03G1217900
GO:0010162	seed dormancy process	0.03	0.03	6	1 (16.67%)	TraesCS5B03G1217900
GO:0006595	polyamine metabolic process	0.03	0.03	55	2 (3.64%)	TraesCS7A03G0856200;TraesCS7B03G0654200
GO:0006596	polyamine biosynthetic process	0.03	0.03	53	2 (3.77%)	TraesCS7A03G0856200;TraesCS7B03G0654200
GO:0042221	response to chemical	0.04	0.04	1733	14 (0.81%)	TraesCS5D03G0876900;TraesCS1A03G0514200;TraesCS3B03G1020400;TraesCS7B03G0019600;TraesCS6B03G0173000;TraesCS2B03G1233700;TraesCS1D03G0462000;TraesCS5B03G1217900;TraesCS5A03G0438600;TraesCS2D03G0481700;TraesCS6D03G0720300;TraesCS7B03G0900400;TraesCS1B03G0870100;TraesCS7A03G0262100
GO:0071495	cellular response to endogenous stimulus	0.04	0.05	409	5 (1.22%)	TraesCS5D03G0876900;TraesCS1A03G0514200;TraesCS5A03G0438600;TraesCS1B03G0870100;TraesCS2B03G1233700
GO:0032870	cellular response to hormone stimulus	0.04	0.05	408	5 (1.23%)	TraesCS5D03G0876900;TraesCS1A03G0514200;TraesCS5A03G0438600;TraesCS1B03G0870100;TraesCS2B03G1233700
GO:1905183	negative regulation of protein serine/threonine phosphatase activity	0.04	0.05	9	1 (11.11%)	TraesCS1A03G0514200
GO:0006364	rRNA processing	0.04	0.05	278	4 (1.44%)	TraesCS1D03G0951000;TraesCS2B03G0912100;TraesCS2B03G1148900;TraesCS7A03G1300000
GO:0006749	glutathione metabolic process	0.04	0.04	399	5 (1.25%)	TraesCS5B03G0674600;TraesCS2B03G1436800;TraesCS5A03G1177200;TraesCS4B03G0779400;TraesCS7A03G1072300
GO:0048731	system development	0.04	0.04	658	7 (1.06%)	TraesCS3A03G0312100;TraesCS5B03G1217900;TraesCS3B03G0370200;TraesCS5B03G0760100;TraesCS3D03G0289600;TraesCS7B03G0019600;TraesCS7A03G0262100
GO:0061458	reproductive system development	0.04	0.05	407	5 (1.23%)	TraesCS3A03G0312100;TraesCS5B03G1217900;TraesCS3B03G0370200;TraesCS5B03G0760100;TraesCS3D03G0289600
GO:0048608	reproductive structure development	0.04	0.05	407	5 (1.23%)	TraesCS3A03G0312100;TraesCS5B03G1217900;TraesCS3B03G0370200;TraesCS5B03G0760100;TraesCS3D03G0289600
GO:0006766	vitamin metabolic process	0.04	0.04	160	3 (1.88%)	TraesCS4D03G0818300;TraesCS3B03G1273000;TraesCS7D03G0732500
GO:0009110	vitamin biosynthetic process	0.04	0.04	154	3 (1.95%)	TraesCS4D03G0818300;TraesCS3B03G1273000;TraesCS7D03G0732500
GO:0008614	pyridoxine metabolic process	0.04	0.05	9	1 (11.11%)	TraesCS4D03G0818300
GO:0008615	pyridoxine biosynthetic process	0.04	0.05	9	1 (11.11%)	TraesCS4D03G0818300
GO:0043096	purine nucleobase salvage	0.04	0.05	9	1 (11.11%)	TraesCS6D03G0509900
GO:0046083	adenine metabolic process	0.04	0.05	9	1 (11.11%)	TraesCS6D03G0509900
GO:0046084	adenine biosynthetic process	0.04	0.05	9	1 (11.11%)	TraesCS6D03G0509900
GO:0006168	adenine salvage	0.04	0.05	9	1 (11.11%)	TraesCS6D03G0509900
GO:0097305	response to alcohol	0.05	0.05	284	4 (1.41%)	TraesCS1A03G0514200;TraesCS5B03G1217900;TraesCS1B03G0870100;TraesCS2B03G1233700
GO:0009737	response to abscisic acid	0.05	0.05	284	4 (1.41%)	TraesCS1A03G0514200;TraesCS5B03G1217900;TraesCS1B03G0870100;TraesCS2B03G1233700
GO:0016072	rRNA metabolic process	0.05	0.05	285	4 (1.4%)	TraesCS1D03G0951000;TraesCS2B03G0912100;TraesCS2B03G1148900;TraesCS7A03G1300000
GO:0042180	cellular ketone metabolic process	0.05	0.05	75	2 (2.67%)	TraesCS3D03G0567300;TraesCS7D03G0732500
GO:0040020	regulation of meiotic nuclear division	0.05	0.05	10	1 (10%)	TraesCS5B03G0284000

## Sheet: P1000BP
Gene Count:	375
Background Gene Count:	75477
Ontology:	E:\GOAnalyzer\Deployment\Data\gofiles\go-basic.obo
Annotation:	E:\GOAnalyzer\Deployment\data\gofiles\Gene-GO_association.wheat2022
Hierarchy:	biological_process
Correction:	BH FDR p-value adjustment
Max Path Length From Leaf:	N/A
Min Path Length From Root:	3
GO ID	Description	P-Value	Corrected P-Value	Total Genes	Matched Gene Counts	Matched Genes
GO:0030244	cellulose biosynthetic process	3.449e-13	3.783e-13	108	12 (11.11%)	TraesCS1B03G0493300;TraesCS7B03G0538200;TraesCS7D03G0700000;TraesCS2A03G0447600;TraesCS7A03G0733400;TraesCS1D03G0371000;TraesCS2B03G0829200;TraesCS2D03G0455400;TraesCS5D03G0536900;TraesCS5B03G0582100;TraesCS2B03G0570300;TraesCS5A03G0570800
GO:0009250	glucan biosynthetic process	6.772e-12	7.426e-12	217	14 (6.45%)	TraesCS2A03G0908100;TraesCS5B03G0469300;TraesCS2A03G0447600;TraesCS1D03G0371000;TraesCS2B03G0829200;TraesCS2D03G0455400;TraesCS5A03G0570800;TraesCS1B03G0493300;TraesCS7B03G0538200;TraesCS7D03G0700000;TraesCS7A03G0733400;TraesCS5D03G0536900;TraesCS5B03G0582100;TraesCS2B03G0570300
GO:0051274	beta-glucan biosynthetic process	1.394e-11	1.528e-11	147	12 (8.16%)	TraesCS1B03G0493300;TraesCS7B03G0538200;TraesCS7D03G0700000;TraesCS2A03G0447600;TraesCS7A03G0733400;TraesCS1D03G0371000;TraesCS2B03G0829200;TraesCS2D03G0455400;TraesCS5D03G0536900;TraesCS5B03G0582100;TraesCS2B03G0570300;TraesCS5A03G0570800
GO:0030243	cellulose metabolic process	4.699e-11	5.151e-11	163	12 (7.36%)	TraesCS1B03G0493300;TraesCS7B03G0538200;TraesCS7D03G0700000;TraesCS2A03G0447600;TraesCS7A03G0733400;TraesCS1D03G0371000;TraesCS2B03G0829200;TraesCS2D03G0455400;TraesCS5D03G0536900;TraesCS5B03G0582100;TraesCS2B03G0570300;TraesCS5A03G0570800
GO:0044262	cellular carbohydrate metabolic process	1.2e-10	1.315e-10	711	21 (2.95%)	TraesCS2A03G0908100;TraesCS3B03G0993400;TraesCS5B03G0469300;TraesCS4D03G0841300;TraesCS2A03G0447600;TraesCS1D03G0371000;TraesCS2B03G0829200;TraesCS2D03G0455400;TraesCSU03G0234700;TraesCS5A03G0570800;TraesCS1B03G0493300;TraesCS7B03G0538200;TraesCS2B03G0351500;TraesCS7D03G0700000;TraesCS7A03G0733400;TraesCS5D03G0536900;TraesCS2A03G0256000;TraesCS2D03G0266300;TraesCS5B03G0582100;TraesCS2A03G0349200;…
GO:0033692	cellular polysaccharide biosynthetic process	1.367e-10	1.498e-10	272	14 (5.15%)	TraesCS2A03G0908100;TraesCS5B03G0469300;TraesCS2A03G0447600;TraesCS1D03G0371000;TraesCS2B03G0829200;TraesCS2D03G0455400;TraesCS5A03G0570800;TraesCS1B03G0493300;TraesCS7B03G0538200;TraesCS7D03G0700000;TraesCS7A03G0733400;TraesCS5D03G0536900;TraesCS5B03G0582100;TraesCS2B03G0570300
GO:0006073	cellular glucan metabolic process	1.409e-10	1.544e-10	443	17 (3.84%)	TraesCS2A03G0908100;TraesCS3B03G0993400;TraesCS5B03G0469300;TraesCS4D03G0841300;TraesCS2A03G0447600;TraesCS1D03G0371000;TraesCS2B03G0829200;TraesCS2D03G0455400;TraesCSU03G0234700;TraesCS5A03G0570800;TraesCS1B03G0493300;TraesCS7B03G0538200;TraesCS7D03G0700000;TraesCS7A03G0733400;TraesCS5D03G0536900;TraesCS5B03G0582100;TraesCS2B03G0570300
GO:0044042	glucan metabolic process	1.51e-10	1.653e-10	445	17 (3.82%)	TraesCS2A03G0908100;TraesCS3B03G0993400;TraesCS5B03G0469300;TraesCS4D03G0841300;TraesCS2A03G0447600;TraesCS1D03G0371000;TraesCS2B03G0829200;TraesCS2D03G0455400;TraesCSU03G0234700;TraesCS5A03G0570800;TraesCS1B03G0493300;TraesCS7B03G0538200;TraesCS7D03G0700000;TraesCS7A03G0733400;TraesCS5D03G0536900;TraesCS5B03G0582100;TraesCS2B03G0570300
GO:0051273	beta-glucan metabolic process	5.627e-10	6.161e-10	202	12 (5.94%)	TraesCS1B03G0493300;TraesCS7B03G0538200;TraesCS7D03G0700000;TraesCS2A03G0447600;TraesCS7A03G0733400;TraesCS1D03G0371000;TraesCS2B03G0829200;TraesCS2D03G0455400;TraesCS5D03G0536900;TraesCS5B03G0582100;TraesCS2B03G0570300;TraesCS5A03G0570800
GO:0000271	polysaccharide biosynthetic process	6.623e-10	7.249e-10	307	14 (4.56%)	TraesCS2A03G0908100;TraesCS5B03G0469300;TraesCS2A03G0447600;TraesCS1D03G0371000;TraesCS2B03G0829200;TraesCS2D03G0455400;TraesCS5A03G0570800;TraesCS1B03G0493300;TraesCS7B03G0538200;TraesCS7D03G0700000;TraesCS7A03G0733400;TraesCS5D03G0536900;TraesCS5B03G0582100;TraesCS2B03G0570300
GO:0044264	cellular polysaccharide metabolic process	1.264e-09	1.383e-09	512	17 (3.32%)	TraesCS2A03G0908100;TraesCS3B03G0993400;TraesCS5B03G0469300;TraesCS4D03G0841300;TraesCS2A03G0447600;TraesCS1D03G0371000;TraesCS2B03G0829200;TraesCS2D03G0455400;TraesCSU03G0234700;TraesCS5A03G0570800;TraesCS1B03G0493300;TraesCS7B03G0538200;TraesCS7D03G0700000;TraesCS7A03G0733400;TraesCS5D03G0536900;TraesCS5B03G0582100;TraesCS2B03G0570300
GO:0016051	carbohydrate biosynthetic process	1.891e-09	2.069e-09	458	16 (3.49%)	TraesCS2A03G0908100;TraesCS5B03G0469300;TraesCS2A03G0447600;TraesCS1D03G0371000;TraesCS2B03G0829200;TraesCS2D03G0455400;TraesCS5A03G0570800;TraesCS1B03G0493300;TraesCS2B03G0179300;TraesCS7B03G0538200;TraesCS2A03G0132200;TraesCS7D03G0700000;TraesCS7A03G0733400;TraesCS5D03G0536900;TraesCS5B03G0582100;TraesCS2B03G0570300
GO:0034637	cellular carbohydrate biosynthetic process	4.413e-09	4.826e-09	356	14 (3.93%)	TraesCS2A03G0908100;TraesCS5B03G0469300;TraesCS2A03G0447600;TraesCS1D03G0371000;TraesCS2B03G0829200;TraesCS2D03G0455400;TraesCS5A03G0570800;TraesCS1B03G0493300;TraesCS7B03G0538200;TraesCS7D03G0700000;TraesCS7A03G0733400;TraesCS5D03G0536900;TraesCS5B03G0582100;TraesCS2B03G0570300
GO:0005976	polysaccharide metabolic process	7.922e-08	8.663e-08	680	17 (2.5%)	TraesCS2A03G0908100;TraesCS3B03G0993400;TraesCS5B03G0469300;TraesCS4D03G0841300;TraesCS2A03G0447600;TraesCS1D03G0371000;TraesCS2B03G0829200;TraesCS2D03G0455400;TraesCSU03G0234700;TraesCS5A03G0570800;TraesCS1B03G0493300;TraesCS7B03G0538200;TraesCS7D03G0700000;TraesCS7A03G0733400;TraesCS5D03G0536900;TraesCS5B03G0582100;TraesCS2B03G0570300
GO:0009832	plant-type cell wall biogenesis	8.703e-07	9.514e-07	102	7 (6.86%)	TraesCS5D03G0253700;TraesCS5B03G0257900;TraesCS7D03G0700000;TraesCS2D03G0455400;TraesCS5D03G0536900;TraesCS5A03G0240400;TraesCS5A03G0570800
GO:0000025	maltose catabolic process	2.407e-06	2.63e-06	6	3 (50%)	TraesCS2B03G0351500;TraesCS2A03G0256000;TraesCS2D03G0266300
GO:0071555	cell wall organization	9.522e-06	1.041e-05	676	14 (2.07%)	TraesCS5D03G0253700;TraesCS4D03G0841300;TraesCS5B03G0257900;TraesCS2A03G0447600;TraesCS2B03G0829200;TraesCS2D03G0455400;TraesCSU03G0234700;TraesCS5A03G0570800;TraesCS7B03G0538200;TraesCS7D03G0700000;TraesCS5D03G0536900;TraesCS5A03G0240400;TraesCS3D03G0758100;TraesCS2B03G0570300
GO:0015711	organic anion transport	9.758e-06	1.066e-05	97	6 (6.19%)	TraesCS2A03G0922100;TraesCS2D03G0861600;TraesCS3D03G0055200;TraesCS4B03G0597200;TraesCS3B03G0111100;TraesCS3B03G0076700
GO:0000023	maltose metabolic process	9.996e-06	1.092e-05	9	3 (33.33%)	TraesCS2B03G0351500;TraesCS2A03G0256000;TraesCS2D03G0266300
GO:0045229	external encapsulating structure organization	1.588e-05	1.734e-05	708	14 (1.98%)	TraesCS5D03G0253700;TraesCS4D03G0841300;TraesCS5B03G0257900;TraesCS2A03G0447600;TraesCS2B03G0829200;TraesCS2D03G0455400;TraesCSU03G0234700;TraesCS5A03G0570800;TraesCS7B03G0538200;TraesCS7D03G0700000;TraesCS5D03G0536900;TraesCS5A03G0240400;TraesCS3D03G0758100;TraesCS2B03G0570300
GO:0006820	anion transport	1.739e-05	1.899e-05	290	9 (3.1%)	TraesCS2A03G0922100;TraesCS7A03G0212600;TraesCS2D03G0861600;TraesCS3D03G0055200;TraesCS4B03G0597200;TraesCS5D03G1120000;TraesCS3B03G0111100;TraesCS7A03G0537300;TraesCS3B03G0076700
GO:1901264	carbohydrate derivative transport	2.552e-05	2.785e-05	69	5 (7.25%)	TraesCS2A03G0922100;TraesCS2D03G0861600;TraesCS3D03G0055200;TraesCS3B03G0111100;TraesCS3B03G0076700
GO:0071669	plant-type cell wall organization or biogenesis	3.076e-05	3.357e-05	240	8 (3.33%)	TraesCS5D03G0253700;TraesCS5B03G0257900;TraesCS7D03G0700000;TraesCS2D03G0455400;TraesCS5D03G0536900;TraesCS5A03G0240400;TraesCS3D03G0758100;TraesCS5A03G0570800
GO:0015866	ADP transport	4.252e-05	4.639e-05	14	3 (21.43%)	TraesCS3D03G0055200;TraesCS3B03G0111100;TraesCS3B03G0076700
GO:0140021	mitochondrial ADP transmembrane transport	4.252e-05	4.639e-05	14	3 (21.43%)	TraesCS3D03G0055200;TraesCS3B03G0111100;TraesCS3B03G0076700
GO:1990544	mitochondrial ATP transmembrane transport	4.252e-05	4.639e-05	14	3 (21.43%)	TraesCS3D03G0055200;TraesCS3B03G0111100;TraesCS3B03G0076700
GO:0042546	cell wall biogenesis	4.43e-05	4.832e-05	327	9 (2.75%)	TraesCS5D03G0253700;TraesCS4D03G0841300;TraesCS5B03G0257900;TraesCS7D03G0700000;TraesCS2D03G0455400;TraesCS5D03G0536900;TraesCSU03G0234700;TraesCS5A03G0240400;TraesCS5A03G0570800
GO:0009313	oligosaccharide catabolic process	5.296e-05	5.775e-05	15	3 (20%)	TraesCS2B03G0351500;TraesCS2A03G0256000;TraesCS2D03G0266300
GO:0046352	disaccharide catabolic process	5.296e-05	5.775e-05	15	3 (20%)	TraesCS2B03G0351500;TraesCS2A03G0256000;TraesCS2D03G0266300
GO:1901679	nucleotide transmembrane transport	6.494e-05	7.08e-05	16	3 (18.75%)	TraesCS3D03G0055200;TraesCS3B03G0111100;TraesCS3B03G0076700
GO:0015790	UDP-xylose transmembrane transport	7.362e-05	8.024e-05	3	2 (66.67%)	TraesCS2A03G0922100;TraesCS2D03G0861600
GO:0015867	ATP transport	7.856e-05	8.562e-05	17	3 (17.65%)	TraesCS3D03G0055200;TraesCS3B03G0111100;TraesCS3B03G0076700
GO:0055085	transmembrane transport	8.418e-05	9.172e-05	3222	33 (1.02%)	TraesCS6B03G1024400;TraesCS5B03G0102800;TraesCS6D03G0319100;TraesCS2A03G0414000;TraesCS4A03G0081700;TraesCS5B03G1019300;TraesCS6D03G0772400;TraesCS3B03G0518600;TraesCS2A03G0922100;TraesCS2D03G0861600;TraesCS4B03G0664600;TraesCS7B03G0265800;TraesCS7B03G0376000;TraesCS2D03G1304100;TraesCS5D03G0923500;TraesCS4B03G0700400;TraesCS2A03G1336700;TraesCS2D03G0431000;TraesCS7A03G0212600;TraesCS6D03G0771400…
GO:0005975	carbohydrate metabolic process	9.346e-05	0.0001018	2685	29 (1.08%)	TraesCS5B03G0469300;TraesCS2A03G0447600;TraesCS2D03G0455400;TraesCS2A03G0930400;TraesCS5A03G0570800;TraesCS1B03G0493300;TraesCS7B03G0538200;TraesCS2B03G0351500;TraesCS7D03G0700000;TraesCS2A03G0349200;TraesCS2A03G0908100;TraesCS6D03G0051900;TraesCS2A03G0194000;TraesCS3B03G0993400;TraesCS4D03G0841300;TraesCS1D03G0371000;TraesCS2B03G0829200;TraesCSU03G0234700;TraesCS2B03G0179300;TraesCS2A03G0132200;…
GO:0015865	purine nucleotide transport	9.393e-05	0.0001023	18	3 (16.67%)	TraesCS3D03G0055200;TraesCS3B03G0111100;TraesCS3B03G0076700
GO:0015868	purine ribonucleotide transport	9.393e-05	0.0001023	18	3 (16.67%)	TraesCS3D03G0055200;TraesCS3B03G0111100;TraesCS3B03G0076700
GO:0051503	adenine nucleotide transport	9.393e-05	0.0001023	18	3 (16.67%)	TraesCS3D03G0055200;TraesCS3B03G0111100;TraesCS3B03G0076700
GO:0072530	purine-containing compound transmembrane transport	0.0001747	0.0001902	22	3 (13.64%)	TraesCS3D03G0055200;TraesCS3B03G0111100;TraesCS3B03G0076700
GO:0098656	anion transmembrane transport	0.0001812	0.0001972	104	5 (4.81%)	TraesCS2A03G0922100;TraesCS2D03G0861600;TraesCS3D03G0055200;TraesCS3B03G0111100;TraesCS3B03G0076700
GO:0006629	lipid metabolic process	0.0002186	0.0002379	2008	23 (1.15%)	TraesCS4D03G0131000;TraesCS1A03G0676700;TraesCS4B03G0597200;TraesCS7D03G0971000;TraesCS3D03G0045300;TraesCS5A03G0051400;TraesCS3A03G0034800;TraesCS3B03G0701900;TraesCS2B03G1326100;TraesCS3D03G0694700;TraesCS5B03G0577600;TraesCS4A03G0130200;TraesCS2D03G0448100;TraesCS3D03G0218600;TraesCS6D03G0850400;TraesCS4B03G0020700;TraesCS1D03G0614900;TraesCS1A03G0657000;TraesCS2A03G0234100;TraesCS2B03G0830300…
GO:0071554	cell wall organization or biogenesis	0.0002821	0.000307	931	14 (1.5%)	TraesCS5D03G0253700;TraesCS4D03G0841300;TraesCS5B03G0257900;TraesCS2A03G0447600;TraesCS2B03G0829200;TraesCS2D03G0455400;TraesCSU03G0234700;TraesCS5A03G0570800;TraesCS7B03G0538200;TraesCS7D03G0700000;TraesCS5D03G0536900;TraesCS5A03G0240400;TraesCS3D03G0758100;TraesCS2B03G0570300
GO:0006862	nucleotide transport	0.0004932	0.0005365	31	3 (9.68%)	TraesCS3D03G0055200;TraesCS3B03G0111100;TraesCS3B03G0076700
GO:0015931	nucleobase-containing compound transport	0.0005631	0.0006124	133	5 (3.76%)	TraesCS2A03G0922100;TraesCS2D03G0861600;TraesCS3D03G0055200;TraesCS3B03G0111100;TraesCS3B03G0076700
GO:0016114	terpenoid biosynthetic process	0.0008843	0.0009614	147	5 (3.4%)	TraesCS7D03G0971000;TraesCS1D03G0614900;TraesCS1A03G0657000;TraesCS5A03G0051400;TraesCS1B03G0745100
GO:0043062	extracellular structure organization	0.001296	0.001408	43	3 (6.98%)	TraesCS5D03G0253700;TraesCS5B03G0257900;TraesCS5A03G0240400
GO:0030198	extracellular matrix organization	0.001296	0.001408	43	3 (6.98%)	TraesCS5D03G0253700;TraesCS5B03G0257900;TraesCS5A03G0240400
GO:0070726	cell wall assembly	0.001296	0.001408	43	3 (6.98%)	TraesCS5D03G0253700;TraesCS5B03G0257900;TraesCS5A03G0240400
GO:0071668	plant-type cell wall assembly	0.001296	0.001408	43	3 (6.98%)	TraesCS5D03G0253700;TraesCS5B03G0257900;TraesCS5A03G0240400
GO:0010215	cellulose microfibril organization	0.001296	0.001408	43	3 (6.98%)	TraesCS5D03G0253700;TraesCS5B03G0257900;TraesCS5A03G0240400
GO:0009833	plant-type primary cell wall biogenesis	0.001315	0.001429	11	2 (18.18%)	TraesCS7D03G0700000;TraesCS2D03G0455400
GO:0000281	mitotic cytokinesis	0.001572	0.001708	12	2 (16.67%)	TraesCS7D03G0700000;TraesCS2D03G0455400
GO:0044275	cellular carbohydrate catabolic process	0.001616	0.001755	100	4 (4%)	TraesCS3B03G0993400;TraesCS2B03G0351500;TraesCS2A03G0256000;TraesCS2D03G0266300
GO:0006468	protein phosphorylation	0.001707	0.001853	5255	42 (0.8%)	TraesCS2A03G1337900;TraesCS1A03G0954700;TraesCS7B03G1062900;TraesCSU03G0275600;TraesCS2A03G1358300;TraesCS3A03G0047400;TraesCS5D03G1195500;TraesCS5A03G1010100;TraesCS3B03G0055300;TraesCS6B03G1295100;TraesCS4D03G0174300;TraesCS2B03G1559800;TraesCS2D03G1193900;TraesCS1B03G1211700;TraesCS1D03G0107200;TraesCS2D03G1082200;TraesCS6D03G0244500;TraesCS7B03G0808000;TraesCS5A03G0133700;TraesCS6D03G0246400;…
GO:0006721	terpenoid metabolic process	0.001817	0.001973	173	5 (2.89%)	TraesCS7D03G0971000;TraesCS1D03G0614900;TraesCS1A03G0657000;TraesCS5A03G0051400;TraesCS1B03G0745100
GO:0008610	lipid biosynthetic process	0.001995	0.002166	1018	13 (1.28%)	TraesCS7D03G0971000;TraesCS3D03G0045300;TraesCS5A03G0051400;TraesCS3A03G0034800;TraesCS3D03G0694700;TraesCS5B03G0577600;TraesCS4A03G0130200;TraesCS2D03G0448100;TraesCS3D03G0218600;TraesCS6D03G0850400;TraesCS1D03G0614900;TraesCS1A03G0657000;TraesCS1B03G0745100
GO:0042445	hormone metabolic process	0.002069	0.002246	107	4 (3.74%)	TraesCS4A03G0793900;TraesCS7B03G1227600;TraesCS4A03G0793700;TraesCS3D03G0218600
GO:0097502	mannosylation	0.002154	0.002337	14	2 (14.29%)	TraesCS7D03G0700000;TraesCS2D03G0455400
GO:0042446	hormone biosynthetic process	0.002775	0.00301	56	3 (5.36%)	TraesCS4A03G0793900;TraesCS4A03G0793700;TraesCS3D03G0218600
GO:0016310	phosphorylation	0.002903	0.003148	5575	43 (0.77%)	TraesCS2A03G1337900;TraesCS1A03G0954700;TraesCS7B03G1062900;TraesCSU03G0275600;TraesCS2A03G1358300;TraesCS3A03G0047400;TraesCS1D03G0610200;TraesCS5D03G1195500;TraesCS5A03G1010100;TraesCS3B03G0055300;TraesCS6B03G1295100;TraesCS4D03G0174300;TraesCS2B03G1559800;TraesCS2D03G1193900;TraesCS1B03G1211700;TraesCS1D03G0107200;TraesCS2D03G1082200;TraesCS6D03G0244500;TraesCS7B03G0808000;TraesCS5A03G0133700;…
GO:0051234	establishment of localization	0.003515	0.003812	5635	43 (0.76%)	TraesCS6B03G1024400;TraesCS5B03G0102800;TraesCS6D03G0319100;TraesCS2A03G0414000;TraesCS4A03G0081700;TraesCS5B03G1019300;TraesCS6D03G0772400;TraesCS3B03G0518600;TraesCS2A03G0922100;TraesCS3A03G0954300;TraesCS2D03G0861600;TraesCS4B03G0664600;TraesCS7B03G0265800;TraesCS7B03G0376000;TraesCS2D03G1304100;TraesCS5D03G0923500;TraesCS4B03G0700400;TraesCS3A03G0109600;TraesCS4B03G0711100;TraesCS2A03G1202600…
GO:0003333	amino acid transmembrane transport	0.003574	0.003874	18	2 (11.11%)	TraesCS2A03G0256100;TraesCS2D03G0266400
GO:0061640	cytoskeleton-dependent cytokinesis	0.003574	0.003874	18	2 (11.11%)	TraesCS7D03G0700000;TraesCS2D03G0455400
GO:0005984	disaccharide metabolic process	0.004167	0.004516	130	4 (3.08%)	TraesCS2B03G0351500;TraesCS2A03G0256000;TraesCS2D03G0266300;TraesCS2A03G0349200
GO:0006810	transport	0.005277	0.005718	5601	42 (0.75%)	TraesCS6B03G1024400;TraesCS5B03G0102800;TraesCS6D03G0319100;TraesCS2A03G0414000;TraesCS4A03G0081700;TraesCS5B03G1019300;TraesCS6D03G0772400;TraesCS3B03G0518600;TraesCS2A03G0922100;TraesCS3A03G0954300;TraesCS2D03G0861600;TraesCS4B03G0664600;TraesCS7B03G0265800;TraesCS7B03G0376000;TraesCS2D03G1304100;TraesCS5D03G0923500;TraesCS4B03G0700400;TraesCS3A03G0109600;TraesCS4B03G0711100;TraesCS2A03G1202600…
GO:0019685	photosynthesis, dark reaction	0.005325	0.005769	22	2 (9.09%)	TraesCS2B03G0179300;TraesCS2A03G0132200
GO:0019253	reductive pentose-phosphate cycle	0.005325	0.005769	22	2 (9.09%)	TraesCS2B03G0179300;TraesCS2A03G0132200
GO:0009690	cytokinin metabolic process	0.005417	0.005867	71	3 (4.23%)	TraesCS4A03G0793900;TraesCS7B03G1227600;TraesCS4A03G0793700
GO:0044255	cellular lipid metabolic process	0.005454	0.005906	1282	14 (1.09%)	TraesCS4D03G0131000;TraesCS4B03G0597200;TraesCS7D03G0971000;TraesCS3D03G0045300;TraesCS5A03G0051400;TraesCS3A03G0034800;TraesCS3B03G0701900;TraesCS3D03G0694700;TraesCS4A03G0130200;TraesCS6D03G0850400;TraesCS1D03G0614900;TraesCS1A03G0657000;TraesCS3D03G0571200;TraesCS1B03G0745100
GO:0015748	organophosphate ester transport	0.005852	0.006335	73	3 (4.11%)	TraesCS3D03G0055200;TraesCS3B03G0111100;TraesCS3B03G0076700
GO:0010817	regulation of hormone levels	0.005971	0.006462	144	4 (2.78%)	TraesCS4A03G0793900;TraesCS7B03G1227600;TraesCS4A03G0793700;TraesCS3D03G0218600
GO:0008299	isoprenoid biosynthetic process	0.005987	0.006479	229	5 (2.18%)	TraesCS7D03G0971000;TraesCS1D03G0614900;TraesCS1A03G0657000;TraesCS5A03G0051400;TraesCS1B03G0745100
GO:0034754	cellular hormone metabolic process	0.006307	0.006823	75	3 (4%)	TraesCS4A03G0793900;TraesCS7B03G1227600;TraesCS4A03G0793700
GO:0016129	phytosteroid biosynthetic process	0.006321	0.006837	24	2 (8.33%)	TraesCS3D03G0218600;TraesCS5A03G0051400
GO:1990542	mitochondrial transmembrane transport	0.006783	0.007335	77	3 (3.9%)	TraesCS3D03G0055200;TraesCS3B03G0111100;TraesCS3B03G0076700
GO:0050667	homocysteine metabolic process	0.006848	0.007404	25	2 (8%)	TraesCS1A03G0487700;TraesCS1B03G0584600
GO:0019346	transsulfuration	0.006848	0.007404	25	2 (8%)	TraesCS1A03G0487700;TraesCS1B03G0584600
GO:0009092	homoserine metabolic process	0.007395	0.007993	26	2 (7.69%)	TraesCS1A03G0487700;TraesCS1B03G0584600
GO:0090481	pyrimidine nucleotide-sugar transmembrane transport	0.007395	0.007993	26	2 (7.69%)	TraesCS2A03G0922100;TraesCS2D03G0861600
GO:0016128	phytosteroid metabolic process	0.007395	0.007993	26	2 (7.69%)	TraesCS3D03G0218600;TraesCS5A03G0051400
GO:0009311	oligosaccharide metabolic process	0.007536	0.008144	154	4 (2.6%)	TraesCS2B03G0351500;TraesCS2A03G0256000;TraesCS2D03G0266300;TraesCS2A03G0349200
GO:0006796	phosphate-containing compound metabolic process	0.009192	0.009931	6989	49 (0.7%)	TraesCS4D03G0131000;TraesCS1A03G0954700;TraesCS2A03G1358300;TraesCS3A03G0047400;TraesCS5D03G1195500;TraesCS5A03G1010100;TraesCS3B03G0701900;TraesCS3B03G0718700;TraesCS1B03G1211700;TraesCS6D03G0244500;TraesCS7B03G0808000;TraesCS5A03G0133700;TraesCS6D03G0246400;TraesCS1B03G0006500;TraesCS1B03G0264000;TraesCS3D03G0121000;TraesCS5A03G1233400;TraesCS7B03G0872200;TraesCS3B03G0099400;TraesCS3D03G0039500…
GO:0006793	phosphorus metabolic process	0.00969	0.01	7010	49 (0.7%)	TraesCS4D03G0131000;TraesCS1A03G0954700;TraesCS2A03G1358300;TraesCS3A03G0047400;TraesCS5D03G1195500;TraesCS5A03G1010100;TraesCS3B03G0701900;TraesCS3B03G0718700;TraesCS1B03G1211700;TraesCS6D03G0244500;TraesCS7B03G0808000;TraesCS5A03G0133700;TraesCS6D03G0246400;TraesCS1B03G0006500;TraesCS1B03G0264000;TraesCS3D03G0121000;TraesCS5A03G1233400;TraesCS7B03G0872200;TraesCS3B03G0099400;TraesCS3D03G0039500…
GO:0006720	isoprenoid metabolic process	0.01	0.01	261	5 (1.92%)	TraesCS7D03G0971000;TraesCS1D03G0614900;TraesCS1A03G0657000;TraesCS5A03G0051400;TraesCS1B03G0745100
GO:0009765	photosynthesis, light harvesting	0.01	0.01	99	3 (3.03%)	TraesCS7B03G0270600;TraesCS1B03G1053500;TraesCS7A03G0459000
GO:0006694	steroid biosynthetic process	0.01	0.01	90	3 (3.33%)	TraesCS2D03G0448100;TraesCS3D03G0218600;TraesCS5A03G0051400
GO:0000910	cytokinesis	0.01	0.01	34	2 (5.88%)	TraesCS7D03G0700000;TraesCS2D03G0455400
GO:0008643	carbohydrate transport	0.01	0.01	95	3 (3.16%)	TraesCS3A03G0954300;TraesCS5D03G0116600;TraesCS6D03G0025600
GO:0009664	plant-type cell wall organization	0.01	0.01	177	4 (2.26%)	TraesCS5D03G0253700;TraesCS5B03G0257900;TraesCS5A03G0240400;TraesCS3D03G0758100
GO:0009691	cytokinin biosynthetic process	0.01	0.01	34	2 (5.88%)	TraesCS4A03G0793900;TraesCS4A03G0793700
GO:0009834	plant-type secondary cell wall biogenesis	0.01	0.01	34	2 (5.88%)	TraesCS5D03G0536900;TraesCS5A03G0570800
GO:0009853	photorespiration	0.02	0.02	40	2 (5%)	TraesCS2B03G0179300;TraesCS2A03G0132200
GO:0015849	organic acid transport	0.02	0.02	106	3 (2.83%)	TraesCS4B03G0597200;TraesCS2A03G0256100;TraesCS2D03G0266400
GO:0006865	amino acid transport	0.02	0.02	42	2 (4.76%)	TraesCS2A03G0256100;TraesCS2D03G0266400
GO:1903825	organic acid transmembrane transport	0.02	0.02	38	2 (5.26%)	TraesCS2A03G0256100;TraesCS2D03G0266400
GO:1905039	carboxylic acid transmembrane transport	0.02	0.02	38	2 (5.26%)	TraesCS2A03G0256100;TraesCS2D03G0266400
GO:0015780	nucleotide-sugar transmembrane transport	0.02	0.02	38	2 (5.26%)	TraesCS2A03G0922100;TraesCS2D03G0861600
GO:0008202	steroid metabolic process	0.02	0.03	123	3 (2.44%)	TraesCS2D03G0448100;TraesCS3D03G0218600;TraesCS5A03G0051400
GO:0016126	sterol biosynthetic process	0.02	0.02	43	2 (4.65%)	TraesCS2D03G0448100;TraesCS5A03G0051400
GO:0006112	energy reserve metabolic process	0.02	0.02	38	2 (5.26%)	TraesCS3B03G0993400;TraesCS5B03G0469300
GO:0005977	glycogen metabolic process	0.02	0.02	38	2 (5.26%)	TraesCS3B03G0993400;TraesCS5B03G0469300
GO:0005980	glycogen catabolic process	0.02	0.02	4	1 (25%)	TraesCS3B03G0993400
GO:0032259	methylation	0.02	0.02	418	6 (1.44%)	TraesCS3B03G1510700;TraesCS4D03G0017700;TraesCS6D03G0743600;TraesCS5B03G1018300;TraesCS4B03G0025600;TraesCS4A03G0760000
GO:0006817	phosphate ion transport	0.02	0.03	48	2 (4.17%)	TraesCS5D03G1120000;TraesCS7A03G0537300
GO:0009611	response to wounding	0.03	0.04	244	4 (1.64%)	TraesCS1D03G0051000;TraesCS1D03G0051100;TraesCS1A03G0098700;TraesCS1B03G0067900
GO:0015977	carbon fixation	0.03	0.03	51	2 (3.92%)	TraesCS2B03G0179300;TraesCS2A03G0132200
GO:0019252	starch biosynthetic process	0.03	0.03	53	2 (3.77%)	TraesCS2A03G0908100;TraesCS5B03G0469300
GO:0009658	chloroplast organization	0.03	0.04	142	3 (2.11%)	TraesCS3B03G0946900;TraesCS3A03G0825100;TraesCS3B03G0457500
GO:0051202	phytochromobilin metabolic process	0.03	0.04	7	1 (14.29%)	TraesCS3A03G1145700
GO:0010024	phytochromobilin biosynthetic process	0.03	0.04	7	1 (14.29%)	TraesCS3A03G1145700
GO:0006658	phosphatidylserine metabolic process	0.03	0.03	6	1 (16.67%)	TraesCS3D03G0045300
GO:0042398	cellular modified amino acid biosynthetic process	0.03	0.03	56	2 (3.57%)	TraesCS3D03G0045300;TraesCS7D03G1022100
GO:0006659	phosphatidylserine biosynthetic process	0.03	0.03	6	1 (16.67%)	TraesCS3D03G0045300
GO:0048465	corolla development	0.03	0.03	6	1 (16.67%)	TraesCS3D03G0218600
GO:0048441	petal development	0.03	0.03	6	1 (16.67%)	TraesCS3D03G0218600
GO:1901617	organic hydroxy compound biosynthetic process	0.04	0.04	153	3 (1.96%)	TraesCS2D03G0448100;TraesCS3D03G0218600;TraesCS5A03G0051400
GO:0006928	movement of cell or subcellular component	0.05	0.05	165	3 (1.82%)	TraesCS2B03G1030300;TraesCS2D03G0877400;TraesCS2A03G1125000
GO:0007018	microtubule-based movement	0.05	0.05	161	3 (1.86%)	TraesCS2B03G1030300;TraesCS2D03G0877400;TraesCS2A03G1125000
GO:0015698	inorganic anion transport	0.05	0.05	161	3 (1.86%)	TraesCS7A03G0212600;TraesCS5D03G1120000;TraesCS7A03G0537300

## Sheet: P2000BP
Gene Count:	127
Background Gene Count:	75477
Ontology:	E:\GOAnalyzer\Deployment\Data\gofiles\go-basic.obo
Annotation:	E:\GOAnalyzer\Deployment\data\gofiles\Gene-GO_association.wheat2022
Hierarchy:	biological_process
Correction:	BH FDR p-value adjustment
Max Path Length From Leaf:	N/A
Min Path Length From Root:	3
GO ID	Description	P-Value	Corrected P-Value	Total Genes	Matched Gene Counts	Matched Genes
GO:0060567	negative regulation of DNA-templated transcription, termination	4.652e-09	5.07e-09	3	3 (100%)	TraesCS3B03G1129700;TraesCS3A03G0980900;TraesCS3D03G0916100
GO:0031554	regulation of DNA-templated transcription, termination	9.27e-08	1.01e-07	6	3 (50%)	TraesCS3B03G1129700;TraesCS3A03G0980900;TraesCS3D03G0916100
GO:0009845	seed germination	6.006e-07	6.543e-07	39	4 (10.26%)	TraesCS3B03G1129700;TraesCS5D03G1101100;TraesCS3A03G0980900;TraesCS3D03G0916100
GO:0090351	seedling development	1.289e-06	1.404e-06	47	4 (8.51%)	TraesCS3B03G1129700;TraesCS5D03G1101100;TraesCS3A03G0980900;TraesCS3D03G0916100
GO:0043242	negative regulation of protein-containing complex disassembly	3.727e-06	4.058e-06	18	3 (16.67%)	TraesCS3B03G1129700;TraesCS3A03G0980900;TraesCS3D03G0916100
GO:0050789	regulation of biological process	1.641e-05	1.786e-05	7510	29 (0.39%)	TraesCS3B03G1129700;TraesCS2D03G0432300;TraesCS2A03G1350000;TraesCS3A03G0980900;TraesCS6D03G0533600;TraesCS5A03G0239500;TraesCS5B03G0257100;TraesCS3D03G0823900;TraesCS5D03G0858000;TraesCS5B03G1052500;TraesCS3A03G0585900;TraesCS4B03G0945200;TraesCS5B03G0791700;TraesCS5A03G0244600;TraesCS5A03G1006300;TraesCS2D03G0999400;TraesCS5B03G0793300;TraesCS5D03G0718800;TraesCS3D03G0916100;TraesCS4A03G0260800…
GO:0009631	cold acclimation	1.646e-05	1.792e-05	29	3 (10.34%)	TraesCS3B03G1129700;TraesCS3A03G0980900;TraesCS3D03G0916100
GO:0043244	regulation of protein-containing complex disassembly	2.446e-05	2.662e-05	33	3 (9.09%)	TraesCS3B03G1129700;TraesCS3A03G0980900;TraesCS3D03G0916100
GO:0050794	regulation of cellular process	2.471e-05	2.688e-05	6861	27 (0.39%)	TraesCS3B03G1129700;TraesCS2D03G0432300;TraesCS2A03G1350000;TraesCS3A03G0980900;TraesCS6D03G0533600;TraesCS5A03G0239500;TraesCS5B03G0257100;TraesCS3D03G0823900;TraesCS5D03G0858000;TraesCS5B03G1052500;TraesCS3A03G0585900;TraesCS4B03G0945200;TraesCS5B03G0791700;TraesCS5A03G0244600;TraesCS5A03G1006300;TraesCS2D03G0999400;TraesCS5B03G0793300;TraesCS5D03G0718800;TraesCS3D03G0916100;TraesCS4A03G0260800…
GO:0060255	regulation of macromolecule metabolic process	7.223e-05	7.855e-05	5293	22 (0.42%)	TraesCS3B03G1129700;TraesCS2D03G0999400;TraesCS5B03G0793300;TraesCS5D03G0718800;TraesCS2A03G1350000;TraesCS3A03G0980900;TraesCS3D03G0916100;TraesCS4A03G0260800;TraesCS6D03G0533600;TraesCS1B03G0665600;TraesCS3B03G0666300;TraesCS3D03G0823900;TraesCS5D03G0858000;TraesCS2B03G1431800;TraesCS3B03G0784600;TraesCS5B03G1052500;TraesCS3A03G0585900;TraesCS4B03G0945200;TraesCS5B03G0529700;TraesCS5B03G0791700…
GO:2000112	regulation of cellular macromolecule biosynthetic process	7.465e-05	8.116e-05	4546	20 (0.44%)	TraesCS3B03G1129700;TraesCS5B03G0793300;TraesCS5D03G0718800;TraesCS2A03G1350000;TraesCS3A03G0980900;TraesCS3D03G0916100;TraesCS4A03G0260800;TraesCS6D03G0533600;TraesCS1B03G0665600;TraesCS3B03G0666300;TraesCS3D03G0823900;TraesCS5D03G0858000;TraesCS2B03G1431800;TraesCS3B03G0784600;TraesCS5B03G1052500;TraesCS3A03G0585900;TraesCS4B03G0945200;TraesCS5B03G0791700;TraesCS5A03G1006300;TraesCS3A03G0393200
GO:0010556	regulation of macromolecule biosynthetic process	7.578e-05	8.237e-05	4551	20 (0.44%)	TraesCS3B03G1129700;TraesCS5B03G0793300;TraesCS5D03G0718800;TraesCS2A03G1350000;TraesCS3A03G0980900;TraesCS3D03G0916100;TraesCS4A03G0260800;TraesCS6D03G0533600;TraesCS1B03G0665600;TraesCS3B03G0666300;TraesCS3D03G0823900;TraesCS5D03G0858000;TraesCS2B03G1431800;TraesCS3B03G0784600;TraesCS5B03G1052500;TraesCS3A03G0585900;TraesCS4B03G0945200;TraesCS5B03G0791700;TraesCS5A03G1006300;TraesCS3A03G0393200
GO:0031326	regulation of cellular biosynthetic process	8.742e-05	9.5e-05	4599	20 (0.43%)	TraesCS3B03G1129700;TraesCS5B03G0793300;TraesCS5D03G0718800;TraesCS2A03G1350000;TraesCS3A03G0980900;TraesCS3D03G0916100;TraesCS4A03G0260800;TraesCS6D03G0533600;TraesCS1B03G0665600;TraesCS3B03G0666300;TraesCS3D03G0823900;TraesCS5D03G0858000;TraesCS2B03G1431800;TraesCS3B03G0784600;TraesCS5B03G1052500;TraesCS3A03G0585900;TraesCS4B03G0945200;TraesCS5B03G0791700;TraesCS5A03G1006300;TraesCS3A03G0393200
GO:0009889	regulation of biosynthetic process	8.898e-05	9.668e-05	4605	20 (0.43%)	TraesCS3B03G1129700;TraesCS5B03G0793300;TraesCS5D03G0718800;TraesCS2A03G1350000;TraesCS3A03G0980900;TraesCS3D03G0916100;TraesCS4A03G0260800;TraesCS6D03G0533600;TraesCS1B03G0665600;TraesCS3B03G0666300;TraesCS3D03G0823900;TraesCS5D03G0858000;TraesCS2B03G1431800;TraesCS3B03G0784600;TraesCS5B03G1052500;TraesCS3A03G0585900;TraesCS4B03G0945200;TraesCS5B03G0791700;TraesCS5A03G1006300;TraesCS3A03G0393200
GO:0051129	negative regulation of cellular component organization	9.68e-05	0.0001051	52	3 (5.77%)	TraesCS3B03G1129700;TraesCS3A03G0980900;TraesCS3D03G0916100
GO:0019222	regulation of metabolic process	0.0001031	0.000112	5424	22 (0.41%)	TraesCS3B03G1129700;TraesCS2D03G0999400;TraesCS5B03G0793300;TraesCS5D03G0718800;TraesCS2A03G1350000;TraesCS3A03G0980900;TraesCS3D03G0916100;TraesCS4A03G0260800;TraesCS6D03G0533600;TraesCS1B03G0665600;TraesCS3B03G0666300;TraesCS3D03G0823900;TraesCS5D03G0858000;TraesCS2B03G1431800;TraesCS3B03G0784600;TraesCS5B03G1052500;TraesCS3A03G0585900;TraesCS4B03G0945200;TraesCS5B03G0529700;TraesCS5B03G0791700…
GO:0006355	regulation of transcription, DNA-templated	0.0001047	0.0001137	4287	19 (0.44%)	TraesCS3B03G1129700;TraesCS5B03G0793300;TraesCS5D03G0718800;TraesCS2A03G1350000;TraesCS3A03G0980900;TraesCS3D03G0916100;TraesCS4A03G0260800;TraesCS6D03G0533600;TraesCS1B03G0665600;TraesCS3B03G0666300;TraesCS3D03G0823900;TraesCS5D03G0858000;TraesCS2B03G1431800;TraesCS3B03G0784600;TraesCS5B03G1052500;TraesCS3A03G0585900;TraesCS5B03G0791700;TraesCS5A03G1006300;TraesCS3A03G0393200
GO:2001141	regulation of RNA biosynthetic process	0.0001057	0.0001147	4290	19 (0.44%)	TraesCS3B03G1129700;TraesCS5B03G0793300;TraesCS5D03G0718800;TraesCS2A03G1350000;TraesCS3A03G0980900;TraesCS3D03G0916100;TraesCS4A03G0260800;TraesCS6D03G0533600;TraesCS1B03G0665600;TraesCS3B03G0666300;TraesCS3D03G0823900;TraesCS5D03G0858000;TraesCS2B03G1431800;TraesCS3B03G0784600;TraesCS5B03G1052500;TraesCS3A03G0585900;TraesCS5B03G0791700;TraesCS5A03G1006300;TraesCS3A03G0393200
GO:1903506	regulation of nucleic acid-templated transcription	0.0001057	0.0001147	4290	19 (0.44%)	TraesCS3B03G1129700;TraesCS5B03G0793300;TraesCS5D03G0718800;TraesCS2A03G1350000;TraesCS3A03G0980900;TraesCS3D03G0916100;TraesCS4A03G0260800;TraesCS6D03G0533600;TraesCS1B03G0665600;TraesCS3B03G0666300;TraesCS3D03G0823900;TraesCS5D03G0858000;TraesCS2B03G1431800;TraesCS3B03G0784600;TraesCS5B03G1052500;TraesCS3A03G0585900;TraesCS5B03G0791700;TraesCS5A03G1006300;TraesCS3A03G0393200
GO:0034654	nucleobase-containing compound biosynthetic process	0.0001142	0.000124	2248	13 (0.58%)	TraesCS7D03G0596600;TraesCS5B03G0793300;TraesCS7A03G1223100;TraesCS5D03G0718800;TraesCS6D03G0533600;TraesCS1B03G0665600;TraesCS3D03G0823900;TraesCS2B03G1431800;TraesCS6B03G0147700;TraesCS7B03G1108000;TraesCS5B03G0791700;TraesCS5A03G1006300;TraesCS3A03G0393200
GO:0031323	regulation of cellular metabolic process	0.0001225	0.0001329	5099	21 (0.41%)	TraesCS3B03G1129700;TraesCS2D03G0999400;TraesCS5B03G0793300;TraesCS5D03G0718800;TraesCS2A03G1350000;TraesCS3A03G0980900;TraesCS3D03G0916100;TraesCS4A03G0260800;TraesCS6D03G0533600;TraesCS1B03G0665600;TraesCS3B03G0666300;TraesCS3D03G0823900;TraesCS5D03G0858000;TraesCS2B03G1431800;TraesCS3B03G0784600;TraesCS5B03G1052500;TraesCS3A03G0585900;TraesCS4B03G0945200;TraesCS5B03G0791700;TraesCS5A03G1006300…
GO:0006351	transcription, DNA-templated	0.0001379	0.0001496	1683	11 (0.65%)	TraesCS2B03G1431800;TraesCS5B03G0793300;TraesCS7A03G1223100;TraesCS5D03G0718800;TraesCS7B03G1108000;TraesCS6D03G0533600;TraesCS5B03G0791700;TraesCS1B03G0665600;TraesCS5A03G1006300;TraesCS3A03G0393200;TraesCS3D03G0823900
GO:0097659	nucleic acid-templated transcription	0.0001393	0.0001511	1685	11 (0.65%)	TraesCS2B03G1431800;TraesCS5B03G0793300;TraesCS7A03G1223100;TraesCS5D03G0718800;TraesCS7B03G1108000;TraesCS6D03G0533600;TraesCS5B03G0791700;TraesCS1B03G0665600;TraesCS5A03G1006300;TraesCS3A03G0393200;TraesCS3D03G0823900
GO:0051252	regulation of RNA metabolic process	0.0001411	0.000153	4387	19 (0.43%)	TraesCS3B03G1129700;TraesCS5B03G0793300;TraesCS5D03G0718800;TraesCS2A03G1350000;TraesCS3A03G0980900;TraesCS3D03G0916100;TraesCS4A03G0260800;TraesCS6D03G0533600;TraesCS1B03G0665600;TraesCS3B03G0666300;TraesCS3D03G0823900;TraesCS5D03G0858000;TraesCS2B03G1431800;TraesCS3B03G0784600;TraesCS5B03G1052500;TraesCS3A03G0585900;TraesCS5B03G0791700;TraesCS5A03G1006300;TraesCS3A03G0393200
GO:0032774	RNA biosynthetic process	0.0001444	0.0001565	1692	11 (0.65%)	TraesCS2B03G1431800;TraesCS5B03G0793300;TraesCS7A03G1223100;TraesCS5D03G0718800;TraesCS7B03G1108000;TraesCS6D03G0533600;TraesCS5B03G0791700;TraesCS1B03G0665600;TraesCS5A03G1006300;TraesCS3A03G0393200;TraesCS3D03G0823900
GO:0019219	regulation of nucleobase-containing compound metabolic process	0.0001613	0.0001748	4433	19 (0.43%)	TraesCS3B03G1129700;TraesCS5B03G0793300;TraesCS5D03G0718800;TraesCS2A03G1350000;TraesCS3A03G0980900;TraesCS3D03G0916100;TraesCS4A03G0260800;TraesCS6D03G0533600;TraesCS1B03G0665600;TraesCS3B03G0666300;TraesCS3D03G0823900;TraesCS5D03G0858000;TraesCS2B03G1431800;TraesCS3B03G0784600;TraesCS5B03G1052500;TraesCS3A03G0585900;TraesCS5B03G0791700;TraesCS5A03G1006300;TraesCS3A03G0393200
GO:0019438	aromatic compound biosynthetic process	0.0001616	0.0001751	2655	14 (0.53%)	TraesCS7D03G0596600;TraesCS5B03G0793300;TraesCS7A03G1223100;TraesCS5D03G0718800;TraesCS6D03G0533600;TraesCS1B03G0665600;TraesCS3D03G0823900;TraesCS2B03G1431800;TraesCS6B03G0147700;TraesCS3B03G0699500;TraesCS7B03G1108000;TraesCS5B03G0791700;TraesCS5A03G1006300;TraesCS3A03G0393200
GO:0018130	heterocycle biosynthetic process	0.0001641	0.0001778	2659	14 (0.53%)	TraesCS7D03G0596600;TraesCS5B03G0793300;TraesCS7A03G1223100;TraesCS5D03G0718800;TraesCS6D03G0533600;TraesCS1B03G0665600;TraesCS3D03G0823900;TraesCS2B03G1431800;TraesCS6B03G0147700;TraesCS3B03G0699500;TraesCS7B03G1108000;TraesCS5B03G0791700;TraesCS5A03G1006300;TraesCS3A03G0393200
GO:0009409	response to cold	0.000168	0.000182	161	4 (2.48%)	TraesCS3B03G1129700;TraesCS3A03G0980900;TraesCS3D03G0916100;TraesCS4A03G0260800
GO:0010468	regulation of gene expression	0.0001763	0.0001909	4846	20 (0.41%)	TraesCS3B03G1129700;TraesCS5B03G0793300;TraesCS5D03G0718800;TraesCS2A03G1350000;TraesCS3A03G0980900;TraesCS3D03G0916100;TraesCS4A03G0260800;TraesCS6D03G0533600;TraesCS1B03G0665600;TraesCS3B03G0666300;TraesCS3D03G0823900;TraesCS5D03G0858000;TraesCS2B03G1431800;TraesCS3B03G0784600;TraesCS5B03G1052500;TraesCS3A03G0585900;TraesCS5B03G0529700;TraesCS5B03G0791700;TraesCS5A03G1006300;TraesCS3A03G0393200
GO:0051171	regulation of nitrogen compound metabolic process	0.0002522	0.000273	4980	20 (0.4%)	TraesCS3B03G1129700;TraesCS2D03G0999400;TraesCS5B03G0793300;TraesCS5D03G0718800;TraesCS2A03G1350000;TraesCS3A03G0980900;TraesCS3D03G0916100;TraesCS4A03G0260800;TraesCS6D03G0533600;TraesCS1B03G0665600;TraesCS3B03G0666300;TraesCS3D03G0823900;TraesCS5D03G0858000;TraesCS2B03G1431800;TraesCS3B03G0784600;TraesCS5B03G1052500;TraesCS3A03G0585900;TraesCS5B03G0791700;TraesCS5A03G1006300;TraesCS3A03G0393200
GO:0016115	terpenoid catabolic process	0.0002523	0.000273	14	2 (14.29%)	TraesCS1D03G0303600;TraesCS3B03G0397400
GO:0016103	diterpenoid catabolic process	0.0002523	0.000273	14	2 (14.29%)	TraesCS1D03G0303600;TraesCS3B03G0397400
GO:0045487	gibberellin catabolic process	0.0002523	0.000273	14	2 (14.29%)	TraesCS1D03G0303600;TraesCS3B03G0397400
GO:0080090	regulation of primary metabolic process	0.0002741	0.0002966	5012	20 (0.4%)	TraesCS3B03G1129700;TraesCS2D03G0999400;TraesCS5B03G0793300;TraesCS5D03G0718800;TraesCS2A03G1350000;TraesCS3A03G0980900;TraesCS3D03G0916100;TraesCS4A03G0260800;TraesCS6D03G0533600;TraesCS1B03G0665600;TraesCS3B03G0666300;TraesCS3D03G0823900;TraesCS5D03G0858000;TraesCS2B03G1431800;TraesCS3B03G0784600;TraesCS5B03G1052500;TraesCS3A03G0585900;TraesCS5B03G0791700;TraesCS5A03G1006300;TraesCS3A03G0393200
GO:1901362	organic cyclic compound biosynthetic process	0.0003643	0.0003941	2877	14 (0.49%)	TraesCS7D03G0596600;TraesCS5B03G0793300;TraesCS7A03G1223100;TraesCS5D03G0718800;TraesCS6D03G0533600;TraesCS1B03G0665600;TraesCS3D03G0823900;TraesCS2B03G1431800;TraesCS6B03G0147700;TraesCS3B03G0699500;TraesCS7B03G1108000;TraesCS5B03G0791700;TraesCS5A03G1006300;TraesCS3A03G0393200
GO:1901700	response to oxygen-containing compound	0.000501	0.0005419	819	7 (0.85%)	TraesCS3B03G1129700;TraesCS2D03G0999400;TraesCS2D03G0432300;TraesCS5D03G1101100;TraesCS3A03G0980900;TraesCS3D03G0916100;TraesCS4A03G0260800
GO:0009651	response to salt stress	0.0005209	0.0005632	217	4 (1.84%)	TraesCS3B03G1129700;TraesCS3A03G0980900;TraesCS3D03G0916100;TraesCS4A03G0260800
GO:0008300	isoprenoid catabolic process	0.0006347	0.0006862	22	2 (9.09%)	TraesCS1D03G0303600;TraesCS3B03G0397400
GO:0006970	response to osmotic stress	0.0008696	0.0009399	249	4 (1.61%)	TraesCS3B03G1129700;TraesCS3A03G0980900;TraesCS3D03G0916100;TraesCS4A03G0260800
GO:0009685	gibberellin metabolic process	0.001348	0.001457	32	2 (6.25%)	TraesCS1D03G0303600;TraesCS3B03G0397400
GO:0097305	response to alcohol	0.001411	0.001524	284	4 (1.41%)	TraesCS2D03G0999400;TraesCS2D03G0432300;TraesCS5D03G1101100;TraesCS4A03G0260800
GO:0009737	response to abscisic acid	0.001411	0.001524	284	4 (1.41%)	TraesCS2D03G0999400;TraesCS2D03G0432300;TraesCS5D03G1101100;TraesCS4A03G0260800
GO:0016101	diterpenoid metabolic process	0.001898	0.00205	38	2 (5.26%)	TraesCS1D03G0303600;TraesCS3B03G0397400
GO:0009266	response to temperature stimulus	0.001986	0.002145	312	4 (1.28%)	TraesCS3B03G1129700;TraesCS3A03G0980900;TraesCS3D03G0916100;TraesCS4A03G0260800
GO:0042026	protein refolding	0.002424	0.002618	43	2 (4.65%)	TraesCS5D03G0843000;TraesCS5B03G0926900
GO:0009628	response to abiotic stimulus	0.002429	0.002622	1079	7 (0.65%)	TraesCS3B03G1129700;TraesCS3A03G0980900;TraesCS3D03G0916100;TraesCS4A03G0260800;TraesCS1D03G0303600;TraesCS3B03G0397400;TraesCS5B03G0893800
GO:0007275	multicellular organism development	0.00257	0.002773	1090	7 (0.64%)	TraesCS3B03G1129700;TraesCS3D03G0036200;TraesCS5D03G1101100;TraesCS3A03G0980900;TraesCS3D03G0916100;TraesCS2D03G0195800;TraesCS7B03G0877800
GO:0045892	negative regulation of transcription, DNA-templated	0.002852	0.003077	166	3 (1.81%)	TraesCS3B03G1129700;TraesCS3A03G0980900;TraesCS3D03G0916100
GO:0044271	cellular nitrogen compound biosynthetic process	0.002995	0.00323	4399	16 (0.36%)	TraesCS3A03G0396300;TraesCS7D03G0596600;TraesCS5B03G0793300;TraesCS7A03G1223100;TraesCS5D03G0718800;TraesCS6D03G0533600;TraesCS1B03G0665600;TraesCS3D03G0823900;TraesCS2B03G1431800;TraesCS6B03G0147700;TraesCS3B03G0699500;TraesCS7B03G1108000;TraesCS5B03G0791700;TraesCS5A03G1006300;TraesCS5D03G1189100;TraesCS3A03G0393200
GO:1902679	negative regulation of RNA biosynthetic process	0.003	0.003235	169	3 (1.78%)	TraesCS3B03G1129700;TraesCS3A03G0980900;TraesCS3D03G0916100
GO:1903507	negative regulation of nucleic acid-templated transcription	0.003	0.003235	169	3 (1.78%)	TraesCS3B03G1129700;TraesCS3A03G0980900;TraesCS3D03G0916100
GO:0098755	maintenance of seed dormancy by absisic acid	0.003362	0.003625	2	1 (50%)	TraesCS5D03G1101100
GO:0051253	negative regulation of RNA metabolic process	0.003807	0.004103	184	3 (1.63%)	TraesCS3B03G1129700;TraesCS3A03G0980900;TraesCS3D03G0916100
GO:0000278	mitotic cell cycle	0.003865	0.004165	185	3 (1.62%)	TraesCS5B03G1204400;TraesCS1D03G0735500;TraesCS1A03G0768600
GO:0048856	anatomical structure development	0.004438	0.004782	1205	7 (0.58%)	TraesCS3B03G1129700;TraesCS3D03G0036200;TraesCS5D03G1101100;TraesCS3A03G0980900;TraesCS3D03G0916100;TraesCS2D03G0195800;TraesCS7B03G0877800
GO:0033993	response to lipid	0.004771	0.005139	399	4 (1%)	TraesCS2D03G0999400;TraesCS2D03G0432300;TraesCS5D03G1101100;TraesCS4A03G0260800
GO:0019310	inositol catabolic process	0.005039	0.005427	3	1 (33.33%)	TraesCS7B03G0737900
GO:0045934	negative regulation of nucleobase-containing compound metabolic process	0.005072	0.00546	204	3 (1.47%)	TraesCS3B03G1129700;TraesCS3A03G0980900;TraesCS3D03G0916100
GO:0048285	organelle fission	0.005351	0.00576	208	3 (1.44%)	TraesCS5B03G1204400;TraesCS2D03G0595300;TraesCS2D03G0195800
GO:0051128	regulation of cellular component organization	0.005423	0.005836	209	3 (1.44%)	TraesCS3B03G1129700;TraesCS3A03G0980900;TraesCS3D03G0916100
GO:0007049	cell cycle	0.005474	0.00589	415	4 (0.96%)	TraesCS5B03G1204400;TraesCS1D03G0735500;TraesCS2D03G0195800;TraesCS1A03G0768600
GO:0007349	cellularization	0.006714	0.007222	4	1 (25%)	TraesCS2D03G0195800
GO:0009558	embryo sac cellularization	0.006714	0.007222	4	1 (25%)	TraesCS2D03G0195800
GO:0048523	negative regulation of cellular process	0.007253	0.007801	711	5 (0.7%)	TraesCS3B03G1129700;TraesCS2D03G0999400;TraesCS2D03G0432300;TraesCS3A03G0980900;TraesCS3D03G0916100
GO:0009611	response to wounding	0.008287	0.008911	244	3 (1.23%)	TraesCS2B03G0445800;TraesCS2A03G0325500;TraesCS6B03G0223800
GO:0042450	arginine biosynthetic process via ornithine	0.008385	0.009014	5	1 (20%)	TraesCS4D03G0461700
GO:0050000	chromosome localization	0.008385	0.009014	5	1 (20%)	TraesCS5B03G1204400
GO:0051303	establishment of chromosome localization	0.008385	0.009014	5	1 (20%)	TraesCS5B03G1204400
GO:0051310	metaphase plate congression	0.008385	0.009014	5	1 (20%)	TraesCS5B03G1204400
GO:0007080	mitotic metaphase plate congression	0.008385	0.009014	5	1 (20%)	TraesCS5B03G1204400
GO:0051315	attachment of mitotic spindle microtubules to kinetochore	0.008385	0.009014	5	1 (20%)	TraesCS5B03G1204400
GO:0097437	maintenance of dormancy	0.008385	0.009014	5	1 (20%)	TraesCS5D03G1101100
GO:0010231	maintenance of seed dormancy	0.008385	0.009014	5	1 (20%)	TraesCS5D03G1101100
GO:0019751	polyol metabolic process	0.008745	0.009398	83	2 (2.41%)	TraesCS3B03G0699500;TraesCS7B03G0737900
GO:0042221	response to chemical	0.009234	0.009922	1733	8 (0.46%)	TraesCS3B03G1129700;TraesCS2D03G0999400;TraesCS2D03G0432300;TraesCS5D03G1101100;TraesCS3A03G0980900;TraesCS3D03G0916100;TraesCS4A03G0260800;TraesCS6B03G1017200
GO:0048609	multicellular organismal reproductive process	0.009783	0.01	88	2 (2.27%)	TraesCS5D03G1101100;TraesCS2D03G0195800
GO:0006720	isoprenoid metabolic process	0.009944	0.01	261	3 (1.15%)	TraesCS1D03G0303600;TraesCS2D03G0466100;TraesCS3B03G0397400
GO:0044275	cellular carbohydrate catabolic process	0.01	0.01	100	2 (2%)	TraesCS1A03G0176100;TraesCS7B03G0737900
GO:0044249	cellular biosynthetic process	0.01	0.01	6840	20 (0.29%)	TraesCS3A03G0396300;TraesCS1A03G0248900;TraesCS4D03G0461700;TraesCS7D03G0596600;TraesCS5B03G0793300;TraesCS7A03G1223100;TraesCS5D03G0718800;TraesCS6D03G0533600;TraesCS1B03G0665600;TraesCS3D03G0823900;TraesCS2B03G1431800;TraesCS6B03G0147700;TraesCS3B03G0699500;TraesCS4B03G0945200;TraesCS7B03G1108000;TraesCS2D03G0466100;TraesCS5B03G0791700;TraesCS5A03G1006300;TraesCS5D03G1189100;TraesCS3A03G0393200
GO:1901576	organic substance biosynthetic process	0.01	0.01	7032	20 (0.28%)	TraesCS3A03G0396300;TraesCS1A03G0248900;TraesCS4D03G0461700;TraesCS7D03G0596600;TraesCS5B03G0793300;TraesCS7A03G1223100;TraesCS5D03G0718800;TraesCS6D03G0533600;TraesCS1B03G0665600;TraesCS3D03G0823900;TraesCS2B03G1431800;TraesCS6B03G0147700;TraesCS3B03G0699500;TraesCS4B03G0945200;TraesCS7B03G1108000;TraesCS2D03G0466100;TraesCS5B03G0791700;TraesCS5A03G1006300;TraesCS5D03G1189100;TraesCS3A03G0393200
GO:0016070	RNA metabolic process	0.01	0.02	3477	12 (0.35%)	TraesCS2B03G1431800;TraesCS5B03G0793300;TraesCS7A03G1223100;TraesCS5D03G0718800;TraesCS2B03G1305800;TraesCS7B03G1108000;TraesCS6D03G0533600;TraesCS5B03G0791700;TraesCS1B03G0665600;TraesCS5A03G1006300;TraesCS3A03G0393200;TraesCS3D03G0823900
GO:0044282	small molecule catabolic process	0.01	0.02	302	3 (0.99%)	TraesCS1D03G0303600;TraesCS3B03G0397400;TraesCS7B03G0737900
GO:0044242	cellular lipid catabolic process	0.01	0.01	90	2 (2.22%)	TraesCS1D03G0303600;TraesCS3B03G0397400
GO:0032504	multicellular organism reproduction	0.01	0.01	91	2 (2.2%)	TraesCS5D03G1101100;TraesCS2D03G0195800
GO:0033206	meiotic cytokinesis	0.01	0.01	6	1 (16.67%)	TraesCS2D03G0195800
GO:0007112	male meiosis cytokinesis	0.01	0.01	6	1 (16.67%)	TraesCS2D03G0195800
GO:0097306	cellular response to alcohol	0.01	0.01	105	2 (1.9%)	TraesCS2D03G0999400;TraesCS2D03G0432300
GO:0071215	cellular response to abscisic acid stimulus	0.01	0.01	105	2 (1.9%)	TraesCS2D03G0999400;TraesCS2D03G0432300
GO:0009738	abscisic acid-activated signaling pathway	0.01	0.01	97	2 (2.06%)	TraesCS2D03G0999400;TraesCS2D03G0432300
GO:0031324	negative regulation of cellular metabolic process	0.01	0.01	546	4 (0.73%)	TraesCS3B03G1129700;TraesCS2D03G0999400;TraesCS3A03G0980900;TraesCS3D03G0916100
GO:0051172	negative regulation of nitrogen compound metabolic process	0.01	0.01	524	4 (0.76%)	TraesCS3B03G1129700;TraesCS2D03G0999400;TraesCS3A03G0980900;TraesCS3D03G0916100
GO:0080163	regulation of protein serine/threonine phosphatase activity	0.01	0.01	7	1 (14.29%)	TraesCS2D03G0999400
GO:0010035	response to inorganic substance	0.01	0.01	519	4 (0.77%)	TraesCS3B03G1129700;TraesCS3A03G0980900;TraesCS3D03G0916100;TraesCS4A03G0260800
GO:0009414	response to water deprivation	0.01	0.01	274	3 (1.09%)	TraesCS3B03G1129700;TraesCS3A03G0980900;TraesCS3D03G0916100
GO:0009791	post-embryonic development	0.01	0.01	532	4 (0.75%)	TraesCS3B03G1129700;TraesCS5D03G1101100;TraesCS3A03G0980900;TraesCS3D03G0916100
GO:0008608	attachment of spindle microtubules to kinetochore	0.01	0.01	8	1 (12.5%)	TraesCS5B03G1204400
GO:0022611	dormancy process	0.01	0.01	6	1 (16.67%)	TraesCS5D03G1101100
GO:0010162	seed dormancy process	0.01	0.01	6	1 (16.67%)	TraesCS5D03G1101100
GO:0015939	pantothenate metabolic process	0.01	0.01	6	1 (16.67%)	TraesCS5D03G1189100
GO:0015940	pantothenate biosynthetic process	0.01	0.01	6	1 (16.67%)	TraesCS5D03G1189100
GO:0080022	primary root development	0.01	0.01	6	1 (16.67%)	TraesCS7B03G0877800
GO:0009058	biosynthetic process	0.02	0.03	7451	20 (0.27%)	TraesCS3A03G0396300;TraesCS1A03G0248900;TraesCS4D03G0461700;TraesCS7D03G0596600;TraesCS5B03G0793300;TraesCS7A03G1223100;TraesCS5D03G0718800;TraesCS6D03G0533600;TraesCS1B03G0665600;TraesCS3D03G0823900;TraesCS2B03G1431800;TraesCS6B03G0147700;TraesCS3B03G0699500;TraesCS4B03G0945200;TraesCS7B03G1108000;TraesCS2D03G0466100;TraesCS5B03G0791700;TraesCS5A03G1006300;TraesCS5D03G1189100;TraesCS3A03G0393200
GO:0009416	response to light stimulus	0.02	0.03	364	3 (0.82%)	TraesCS1D03G0303600;TraesCS3B03G0397400;TraesCS5B03G0893800
GO:1900457	regulation of brassinosteroid mediated signaling pathway	0.02	0.02	14	1 (7.14%)	TraesCS2D03G0432300
GO:1900458	negative regulation of brassinosteroid mediated signaling pathway	0.02	0.02	9	1 (11.11%)	TraesCS2D03G0432300
GO:0001101	response to acid chemical	0.02	0.02	312	3 (0.96%)	TraesCS3B03G1129700;TraesCS3A03G0980900;TraesCS3D03G0916100
GO:0009415	response to water	0.02	0.02	308	3 (0.97%)	TraesCS3B03G1129700;TraesCS3A03G0980900;TraesCS3D03G0916100
GO:0009890	negative regulation of biosynthetic process	0.02	0.02	332	3 (0.9%)	TraesCS3B03G1129700;TraesCS3A03G0980900;TraesCS3D03G0916100
GO:0010558	negative regulation of macromolecule biosynthetic process	0.02	0.02	312	3 (0.96%)	TraesCS3B03G1129700;TraesCS3A03G0980900;TraesCS3D03G0916100
GO:0031327	negative regulation of cellular biosynthetic process	0.02	0.02	329	3 (0.91%)	TraesCS3B03G1129700;TraesCS3A03G0980900;TraesCS3D03G0916100
GO:2000113	negative regulation of cellular macromolecule biosynthetic process	0.02	0.02	309	3 (0.97%)	TraesCS3B03G1129700;TraesCS3A03G0980900;TraesCS3D03G0916100
GO:0034311	diol metabolic process	0.02	0.02	11	1 (9.09%)	TraesCS3B03G0699500
GO:0034312	diol biosynthetic process	0.02	0.02	11	1 (9.09%)	TraesCS3B03G0699500
GO:0046146	tetrahydrobiopterin metabolic process	0.02	0.02	9	1 (11.11%)	TraesCS3B03G0699500
GO:0006729	tetrahydrobiopterin biosynthetic process	0.02	0.02	9	1 (11.11%)	TraesCS3B03G0699500
GO:0006591	ornithine metabolic process	0.02	0.02	14	1 (7.14%)	TraesCS4D03G0461700
GO:0051238	sequestering of metal ion	0.02	0.02	9	1 (11.11%)	TraesCS5A03G0417900
GO:0097577	sequestering of iron ion	0.02	0.02	9	1 (11.11%)	TraesCS5A03G0417900
GO:0006880	intracellular sequestering of iron ion	0.02	0.02	9	1 (11.11%)	TraesCS5A03G0417900
GO:0010431	seed maturation	0.02	0.02	13	1 (7.69%)	TraesCS5D03G1101100
GO:0046037	GMP metabolic process	0.02	0.02	9	1 (11.11%)	TraesCS6B03G0147700
GO:0006177	GMP biosynthetic process	0.02	0.02	9	1 (11.11%)	TraesCS6B03G0147700
GO:0010496	intercellular transport	0.02	0.03	15	1 (6.67%)	TraesCS7B03G0313200
GO:0010497	plasmodesmata-mediated intercellular transport	0.02	0.03	15	1 (6.67%)	TraesCS7B03G0313200
GO:0006020	inositol metabolic process	0.02	0.02	12	1 (8.33%)	TraesCS7B03G0737900
GO:0000226	microtubule cytoskeleton organization	0.03	0.04	170	2 (1.18%)	TraesCS1D03G0735500;TraesCS1A03G0768600
GO:1901360	organic cyclic compound metabolic process	0.03	0.03	6141	17 (0.28%)	TraesCS7D03G0596600;TraesCS5B03G0793300;TraesCS7A03G1223100;TraesCS5D03G0718800;TraesCS2B03G1305800;TraesCS6D03G0533600;TraesCS1B03G0665600;TraesCS5B03G0893800;TraesCS3D03G0823900;TraesCS2B03G1431800;TraesCS6B03G0147700;TraesCS6D03G0675000;TraesCS3B03G0699500;TraesCS7B03G1108000;TraesCS5B03G0791700;TraesCS5A03G1006300;TraesCS3A03G0393200
GO:0009314	response to radiation	0.03	0.03	379	3 (0.79%)	TraesCS1D03G0303600;TraesCS3B03G0397400;TraesCS5B03G0893800
GO:0006721	terpenoid metabolic process	0.03	0.04	173	2 (1.16%)	TraesCS1D03G0303600;TraesCS3B03G0397400
[truncated: 36 more rows]

## Sheet: P1111BP
Gene Count:	566
Background Gene Count:	75477
[truncated: 176 more rows]

[truncated: 1 more sheets: P2222BP]
