# Supplementary material for: Computational genomics insights into cold acclimation in wheat
Source: Front Genet. 2022 Oct 20;13:1015673. doi: 10.3389/fgene.2022.1015673 (PMC9632429; doi:10.3389/fgene.2022.1015673)
Supplement: Supplementary file 3 [file Table3.XLSX]

## Sheet: Lists
Supplementary File S3 | Details of the group of 63 WHGs, 64 SHGs and others two groups presented in Figure 2.
Gene_ID				delta LT50
				>1.8	37
	Gene name	Description	DEFE pattern	<-1.8	13
TraesCS1A03G0908000		non-specific lipid-transfer protein 2-like	P0101∩C11∩K00	10.7993
TraesCS1B03G0752200	OsGSTU16	Similar to Glutathione S-transferase GST 41 (EC 2.5.1.18)	P0101∩C11∩K00	-3.86629
TraesCS1B03G0841700		Phosphatidylethanolamine-binding protein PEBP domain containing protein	P0101∩C11∩K00	127.102
TraesCS1B03G1066700		non-specific lipid-transfer protein 2-like	P0101∩C11∩K00	2.54817
TraesCS1B03G1168700	COR413-TM1	Cold acclimation protein COR413-TM1, Cold-regulated 413 inner membrane protein 1, chloroplastic	P0101∩C11∩K00	7.43808
TraesCS1D03G0066300	OEP161	Outer envelope pore protein 16-1, chloroplastic	P0101∩C11∩K00	31.6275
TraesCS1D03G0421900		low-temperature-induced 65 kDa protein-like isoform X1	P0101∩C11∩K00	14.0392
TraesCS2A03G0069900		Pectinesterase inhibitor domain containing protein	P0101∩C11∩K00	0.184375
TraesCS2A03G0367000	GL7	TON1 RECRUIT MOTIF (TRM)-containing protein, Regulation of grain size and shap	P0101∩C11∩K00	-3.31912
TraesCS2A03G0593000		high mobility group nucleosome-binding domain-containing protein 5-like	P0101∩C11∩K00	1.26481
TraesCS2A03G0862400		Zinc finger, RING/FYVE/PHD-type domain containing protein	P0101∩C11∩K00	0.393238
TraesCS2A03G0994800	ERF039	Ethylene-responsive transcription factor ERF039	P0101∩C11∩K00	1.00845
TraesCS2A03G1086200			P0101∩C11∩K00	191.753
TraesCS2B03G0102400		Pectinesterase inhibitor domain containing protein	P0101∩C11∩K00	10.2701
TraesCS2B03G0488200	GL7	TON1 RECRUIT MOTIF (TRM)-containing protein, Regulation of grain size and shap	P0101∩C11∩K00	-6.07597
TraesCS2B03G0580500		Protein of unknown function DUF1218 family protein	P0101∩C11∩K00	-23.8499
TraesCS2D03G0347900		Hypothetical conserved gene	P0101∩C11∩K00	-2.043
TraesCS2D03G0389100	DHFR	putative anthocyanidin reductase	P0101∩C11∩K00	-7.13659
TraesCS2D03G0746300	OsATL13	amino acid transporter AVT1I-like	P0101∩C11∩K00	-0.233183
TraesCS2D03G0826700		Similar to gibberellin receptor GID1L2	P0101∩C11∩K00	4.8344
TraesCS2D03G1058400	CHL	chloroplastic lipocalin-like	P0101∩C11∩K00	23.4462
TraesCS2D03G1214900		geraniol 8-hydroxylase-like	P0101∩C11∩K00	1.52575
TraesCS3A03G0832100	OsGELP26	Lipase, GDSL domain containing protein	P0101∩C11∩K00	6.74197
TraesCS3A03G1036100		Non-specific serine/threonine protein kinase	P0101∩C11∩K00	-117.236
TraesCS3B03G1352700	GER8	Similar to Germin-like protein 1-3	P0101∩C11∩K00	-10.2482
TraesCS3D03G0047400			P0101∩C11∩K00	-0.765745
TraesCS3D03G0865700	BGLU42	Beta-glucosidase 42	P0101∩C11∩K00	1.74171
TraesCS3D03G0964600		Non-specific serine/threonine protein kinase	P0101∩C11∩K00	-17.3748
TraesCS4A03G0856100		leucine-rich repeat receptor-like protein kinase PEPR1	P0101∩C11∩K00	413.157
TraesCS4A03G0858900		phytosulfokine receptor 2	P0101∩C11∩K00	63.0299
TraesCS4B03G0828000		uncharacterized protein LOC123093546 isoform X1	P0101∩C11∩K00	1741.88
TraesCS4B03G0940000		acid phosphatase 1-like	P0101∩C11∩K00	38.2788
TraesCS4D03G0229100		Basic-leucine zipper (BZIP) transcription factor family protein	P0101∩C11∩K00	26.446
TraesCS4D03G0668900		embryonic protein DC-8-like isoform X1	P0101∩C11∩K00	116.7
TraesCS4D03G0738600			P0101∩C11∩K00	1789.24
TraesCS4D03G0748700	DEFL8	Defensin-like protein 1	P0101∩C11∩K00	20.7509
TraesCS5A03G0028100			P0101∩C11∩K00	6.81812
TraesCS5A03G0532400	MYB20	Transcription factor MYB20	P0101∩C11∩K00	24.6171
TraesCS5A03G0564900			P0101∩C11∩K00	-0.435347
TraesCS5A03G0796200		noroxomaritidine synthase 2-like	P0101∩C11∩K00	6.1361
TraesCS5A03G0796300		noroxomaritidine synthase 2-like	P0101∩C11∩K00	19.7135
TraesCS5A03G1073800		probable lactoylglutathione lyase, chloroplastic	P0101∩C11∩K00	39.0999
TraesCS5A03G1113800		Cytochrome P450 family protein	P0101∩C11∩K00	37.3638
TraesCS5A03G1156200			P0101∩C11∩K00	4331.57
TraesCS5B03G0571900		AAA-ATPase At5g57480	P0101∩C11∩K00	6.58793
TraesCS5B03G0828400		noroxomaritidine synthase 2-like	P0101∩C11∩K00	9.50503
TraesCS5B03G0828500		noroxomaritidine synthase 2-like	P0101∩C11∩K00	-23.003
TraesCS5D03G0225200		uncharacterized protein LOC123124437	P0101∩C11∩K00	-149.209
TraesCS5D03G0752600		noroxomaritidine synthase 2-like	P0101∩C11∩K00	-4.54538
TraesCS5D03G1149600		phytosulfokine receptor 2-like	P0101∩C11∩K00	8.96975
TraesCS5D03G1149800		phytosulfokine receptor 1-like	P0101∩C11∩K00	-153.878
TraesCS6B03G0877600		galactan beta-1,4-galactosyltransferase GALS1-like	P0101∩C11∩K00	1.989
TraesCS6D03G0772300		filaggrin-2-like	P0101∩C11∩K00	14.278
TraesCS6D03G0772500	DHN3	dehydrin DHN4-like	P0101∩C11∩K00	-0.678732
TraesCS7A03G0380300		probable apyrase 3	P0101∩C11∩K00	159.026
TraesCS7A03G0517200	OsEnS-122	TB2/DP1 and HVA22 related protein family protein	P0101∩C11∩K00	5.85243
TraesCS7A03G1216800	OsbHLH158	Basic helix-loop-helix dimerisation region bHLH domain containing protein	P0101∩C11∩K00	2.18592
TraesCS7B03G0198800	LYP6	Lysin motif-containing protein, Pattern recognition receptor, Peptidoglycan and chitin perception in innate immunit	P0101∩C11∩K00	1.18775
TraesCS7B03G0888400		uncharacterized protein LOC123162191	P0101∩C11∩K00	0.793181
TraesCS7D03G0087400		late embryogenesis abundant protein 6-like	P0101∩C11∩K00	8.47803
TraesCS7D03G0109900		uncharacterized protein LOC123168984	P0101∩C11∩K00	-0.430977
TraesCS7D03G0446000		Similar to Pyruvate dehydrogenase E1 alpha subunit (EC 1.2.4.1)	P0101∩C11∩K00	1.94906
TraesCS7D03G0803900	OsLEA33	Seed maturation protein domain containing protein	P0101∩C11∩K00	18.1636
TraesCS1A03G0114500		geraniol 8-hydroxylase-like	P1010∩C22∩K00	-0.0718324
TraesCS1A03G0186700			P1010∩C22∩K01	-0.154661
TraesCS1A03G0205600			P1010∩C22∩K02	-0.0179991
TraesCS1A03G0836400	FT3-A1	protein RICE FLOWERING LOCUS T 1-like	P1010∩C22∩K03	-0.0591821
TraesCS1D03G0036500			P1010∩C22∩K04	-0.205839
TraesCS1D03G0805300	FT3-D1	protein RICE FLOWERING LOCUS T 1-like	P1010∩C22∩K05	0.0076017
TraesCS2A03G0062000		putative disease resistance protein RGA1	P1010∩C22∩K06	-0.19357
TraesCS2A03G0362900	MADS18	MADS-box transcription factor 18-like isoform X2	P1010∩C22∩K07	-0.0230533
TraesCS2A03G0643000	DEP	MADS-box transcription factor 15 isoform X1	P1010∩C22∩K08	-0.00496048
TraesCS2A03G1015600		acyclic sesquiterpene synthase-like isoform X2	P1010∩C22∩K09	-0.107129
TraesCS2A03G1132800		G-type lectin S-receptor-like serine/threonine-protein kinase B120	P1010∩C22∩K10	-0.164747
TraesCS2A03G1151600		uncharacterized protein LOC123186258	P1010∩C22∩K11	-0.115856
TraesCS2B03G0260600	wsi76	WSI76 protein induced by water stress	P1010∩C22∩K12	0.00208125
TraesCS2B03G0727900			P1010∩C22∩K13	-0.00819362
TraesCS2B03G1411500		wall-associated receptor kinase 2-like	P1010∩C22∩K14	-0.138938
TraesCS2D03G0033000		L-type lectin-domain containing receptor kinase IX.1-like	P1010∩C22∩K15	-0.0873409
TraesCS2D03G0044500		Alpha/beta hydrolase fold-3 domain containing protein	P1010∩C22∩K16	-0.0114588
TraesCS2D03G0045100	OsPKS14	bisdemethoxycurcumin synthase-like	P1010∩C22∩K17	0.000796516
TraesCS2D03G0241000		flowering-promoting factor 1-like protein 5	P1010∩C22∩K18	-0.121455
TraesCS2D03G0605600	DEP	MADS-box transcription factor 15-like	P1010∩C22∩K19	0.00182334
TraesCS2D03G0725900		uncharacterized protein LOC123049441	P1010∩C22∩K20	-0.116704
TraesCS2D03G0955800	TaKSL5	acyclic sesquiterpene synthase isoform X1	P1010∩C22∩K21	0.0849673
TraesCS2D03G1013200	OsPUP13	Domain of unknown function DUF250 domain containing protein	P1010∩C22∩K22	-0.0114467
TraesCS2D03G1100000		uncharacterized protein LOC123050236	P1010∩C22∩K23	-0.148745
TraesCS2D03G1305500	prx64	Similar to Peroxidase (EC 1.11.1.7)	P1010∩C22∩K24	-0.0175613
TraesCS3A03G0079600			P1010∩C22∩K25	-0.174462
TraesCS3A03G0331600	OsFTL1	Similar to ZCN14 protein	P1010∩C22∩K26	-0.0254094
TraesCS3A03G1159700		uncharacterized protein LOC123059434	P1010∩C22∩K27	-0.156655
TraesCS3B03G0035200	MFT-3B-1	protein MOTHER of FT and TFL1 homolog 2-like	P1010∩C22∩K28	-0.0167824
TraesCS3B03G0309700	OsWRKY107	probable WRKY transcription factor 72	P1010∩C22∩K29	-0.13659
TraesCS3D03G0118500			P1010∩C22∩K30	-0.0445362
TraesCS3D03G0884400	GA20ox-D2	gibberellin 20 oxidase 2-like	P1010∩C22∩K31	0.118969
TraesCS3D03G0935000	OsSPL2	Similar to SBP-domain protein 4	P1010∩C22∩K32	-0.104318
TraesCS4B03G0673800			P1010∩C22∩K33	-0.00518189
TraesCS4B03G0768300		cytochrome P450 716A1-like isoform X2	P1010∩C22∩K34	-0.0129146
TraesCS4B03G0923500		12-oxophytodienoate reductase 1-like	P1010∩C22∩K35	-0.0387764
TraesCS4B03G0970200		protein RICE FLOWERING LOCUS T 1-like	P1010∩C22∩K36	0.00112788
TraesCS4B03G0972000		protein RICE FLOWERING LOCUS T 1-like	P1010∩C22∩K37	0.0015944
TraesCS4D03G0674800	OsATL15	Amino acid transporter, transmembrane domain containing protein	P1010∩C22∩K38	0.0180227
TraesCS5A03G0568100	SAMDC1	S-adenosylmethionine decarboxylase proenzyme-like isoform X1	P1010∩C22∩K39	0.0900512
TraesCS5A03G1040500			P1010∩C22∩K40	-0.0336718
TraesCS5A03G1142000		DIMBOA UDP-glucosyltransferase BX8-like	P1010∩C22∩K41	-0.165835
TraesCS5B03G0492200		probable kinase CHARK	P1010∩C22∩K42	-0.165847
TraesCS5B03G0598900		vacuolar-processing enzyme-like	P1010∩C22∩K43	-0.103061
TraesCS5B03G0715800		probable sarcosine oxidase	P1010∩C22∩K44	-0.135722
TraesCS5B03G1345500		cysteine-rich receptor-like protein kinase 10 isoform X1	P1010∩C22∩K45	-0.205246
TraesCS5D03G0047300		uncharacterized protein LOC123119139	P1010∩C22∩K46	-0.14308
TraesCS5D03G0104900		lipoxygenase 2.2, chloroplastic-like	P1010∩C22∩K47	-0.0207123
TraesCS5D03G0455000		probable kinase CHARK	P1010∩C22∩K48	-0.0532448
TraesCS5D03G0534100	SAMDC1	S-adenosylmethionine decarboxylase proenzyme-like	P1010∩C22∩K49	-0.0684864
TraesCS5D03G1127500		Harpin-induced 1 domain containing protein	P1010∩C22∩K50	-0.10347
TraesCS6B03G0007800	OsWAK16	Protein kinase, catalytic domain domain containing protein	P1010∩C22∩K51	-0.125049
TraesCS6B03G0405500		putative linoleate 9S-lipoxygenase 3	P1010∩C22∩K52	0.015266
TraesCS6D03G0102300		S-(+)-linalool synthase, chloroplastic-like isoform X1	P1010∩C22∩K53	0.10345
TraesCS6D03G0135100		S-(+)-linalool synthase, chloroplastic-like	P1010∩C22∩K54	-0.202132
TraesCS6D03G0269100			P1010∩C22∩K55	0.0041569
TraesCS6D03G0269200			P1010∩C22∩K56	0.03966
TraesCS7A03G0272100	HD3A	Florigen, Heading dat	P1010∩C22∩K57	0.0029869
TraesCS7B03G0031800	HD3A	protein HEADING DATE 3A	P1010∩C22∩K58	0.000613857
TraesCS7B03G0110500		flavonol synthase/flavanone 3-hydroxylase-like	P1010∩C22∩K59	-0.128479
TraesCS7D03G0003200	Hfr-1	2OG-Fe(II) oxygenase domain containing protein	P1010∩C22∩K60	-0.103724
TraesCS7D03G0250300	HD3A	protein HEADING DATE 3A	P1010∩C22∩K61	0.0013161
TraesCS7D03G1105900		ABC transporter G family member 41-like	P1010∩C22∩K62	-0.144318
TraesCSU03G0238600		uncharacterized protein LOC123175974	P1010∩C22∩K63	-0.0330267
TraesCS1B03G0711800	OsANN3	annexin D4-like	P0202∩C22∩K00	0.0896955
TraesCS2D03G0983200			P0202∩C22∩K00	0.0183655
TraesCS3B03G1158700		uncharacterized protein LOC123066234	P0202∩C22∩K00	0.00233451
TraesCS5B03G0835100	OsPIP2	probable aquaporin PIP2-7	P0202∩C22∩K00	0.0696532
TraesCS7A03G0020800	WIVRV	sucrose:sucrose 1-fructosyltransferase	P0202∩C22∩K00	-0.117773
TraesCS7A03G0523600		uncharacterized protein LOC123152691	P0202∩C22∩K00	-0.046721
TraesCS7D03G0081000		3-ketoacyl-CoA synthase 5-like	P0202∩C22∩K00	-0.163281
TraesCS5A03G0609000		2-hydroxyisoflavanone dehydratase-like	P2020∩C11∩K00	-20.2972
TraesCS5D03G0251400		glutaredoxin-C15-like	P2020∩C11∩K00	10.2542

## Sheet: geneTraitCor_R
		Cold	Cold_winter_habit	Cold_spring_habit	DGDG(34:2)	DGDG(34:1)	DGDG(36:5)	DGDG(36:4)	DGDG(36:3)	DGDG(36:2)	DGDG(36:1)	DGDG(38:5)	DGDG(38:4)	MGDG(34:5)	MGDG(34:4)	MGDG(34:3)	MGDG(34:2)	MGDG(34:1)	MGDG(36:6)	MGDG(36:5)	MGDG(36:4)	MGDG(36:3)	MGDG(36:2)	MGDG(38:6)	MGDG(38:5)	Total_MGDG	PG(16:1)	PG(32:1)	PG(34:4)	PG(34:3)	PG(34:2)	PG(34:1)	PG(34:0)	PG(36:6)	PG(36:5)	PG(36:4)	PG(36:2)	PG(36:1)	Total_PG_Ealier	Total_PG_All	LPG(18:3)	LPG(18:2)	LPC(16:0)	LPC(18:3)	LPC(18:2)	LPC(18:1)	LPC(20:1)	Total_LysoPC	LPE(18:3)
TraesCS1A03G0908000	P0101++C11++K00	0.697841	0.968003	-0.162206	-0.839081	-0.747759	-0.709719	-0.647973	-0.718979	-0.785202	-0.731091	-0.7392	-0.299589	-0.735917	-0.698317	-0.723752	-0.696881	-0.684384	-0.74146	-0.692766	-0.687873	-0.713217	-0.700485	-0.743632	-0.757527	-0.740572	-0.898088	-0.724706	-0.74775	0.887226	0.792208	-0.798923	-0.563273	0.860862	0.704434	0.656888	0.327991	0.215238	-0.658066	-0.873365	0.654248	0.187533	0.346959	0.404527	0.37169	0.535434	-0.389218	0.378037	0.625111
TraesCS1B03G0752200	P0101++C11++K00	0.561024	0.906941	-0.259126	-0.689513	-0.592417	-0.561211	-0.471115	-0.568659	-0.642085	-0.609967	-0.628169	-0.1943	-0.574508	-0.553908	-0.591735	-0.576025	-0.595962	-0.582336	-0.545853	-0.544474	-0.577746	-0.543222	-0.596725	-0.621602	-0.58254	-0.844113	-0.597701	-0.623257	0.899773	0.850816	-0.671191	-0.378849	0.87261	0.644798	0.68004	0.381988	0.307941	-0.488696	-0.797624	0.543829	0.117989	0.228233	0.252584	0.242375	0.344041	-0.353191	0.241015	0.494938
TraesCS1B03G0841700	P0101++C11++K00	0.40357	0.696412	-0.230409	-0.509778	-0.376186	-0.401994	-0.3037	-0.422185	-0.465501	-0.387144	-0.49662	-0.056475	-0.396046	-0.395816	-0.432599	-0.429938	-0.366074	-0.42636	-0.371739	-0.376912	-0.399782	-0.328074	-0.425816	-0.435462	-0.422374	-0.72827	-0.431654	-0.480748	0.844742	0.827935	-0.496743	-0.131367	0.829832	0.537463	0.63028	0.407647	0.368561	-0.317756	-0.669557	0.360841	-0.00531696	0.133001	0.0823155	0.0700725	0.165175	-0.256807	0.0897404	0.333142
TraesCS1B03G1066700	P0101++C11++K00	0.468394	0.70473	-0.163875	-0.577918	-0.428864	-0.476482	-0.384832	-0.500747	-0.537258	-0.431093	-0.568952	-0.10228	-0.469168	-0.46571	-0.498129	-0.493554	-0.390171	-0.510244	-0.438018	-0.442801	-0.458615	-0.390238	-0.501463	-0.50547	-0.503937	-0.781993	-0.492666	-0.549895	0.884357	0.838143	-0.556749	-0.183216	0.872213	0.578094	0.636598	0.39087	0.350801	-0.394043	-0.728414	0.392015	-0.00976348	0.185619	0.123428	0.0948216	0.236704	-0.274651	0.128723	0.382482
TraesCS1B03G1168700	P0101++C11++K00	0.478846	0.752887	-0.199963	-0.600209	-0.439321	-0.495521	-0.403201	-0.519935	-0.545192	-0.474956	-0.589729	-0.125909	-0.494889	-0.479892	-0.504765	-0.487128	-0.422716	-0.532739	-0.44917	-0.447714	-0.462139	-0.400971	-0.510417	-0.533366	-0.524444	-0.794182	-0.503919	-0.56328	0.892713	0.85071	-0.565142	-0.193043	0.87385	0.582539	0.669423	0.378927	0.327293	-0.408516	-0.74126	0.399935	-0.0221541	0.175025	0.11938	0.0835406	0.238358	-0.335578	0.118789	0.391439
TraesCS1D03G0066300	P0101++C11++K00	0.470695	0.850191	-0.30668	-0.592197	-0.464679	-0.476033	-0.374256	-0.484967	-0.527664	-0.521718	-0.561065	-0.115231	-0.485605	-0.46262	-0.48969	-0.460643	-0.506575	-0.495607	-0.443529	-0.436157	-0.460353	-0.417953	-0.484298	-0.532823	-0.49213	-0.778236	-0.501566	-0.538507	0.867169	0.859113	-0.566171	-0.241461	0.838756	0.58402	0.710064	0.396275	0.329635	-0.386584	-0.723918	0.447382	0.0489204	0.150527	0.14473	0.13005	0.225911	-0.367123	0.137218	0.408106
TraesCS1D03G0421900	P0101++C11++K00	0.49228	0.791312	-0.222876	-0.607695	-0.485246	-0.489965	-0.394735	-0.506208	-0.56408	-0.480209	-0.571507	-0.113027	-0.489981	-0.483256	-0.52175	-0.516299	-0.463544	-0.514535	-0.465072	-0.46949	-0.494755	-0.43579	-0.520066	-0.528075	-0.512164	-0.800362	-0.520849	-0.562904	0.890211	0.854048	-0.593858	-0.249541	0.873523	0.602396	0.659757	0.409352	0.3524	-0.410326	-0.746783	0.451893	0.0525441	0.19257	0.169472	0.156867	0.264553	-0.286276	0.170244	0.420145
TraesCS2A03G0069900	P0101++C11++K00	0.511399	0.857527	-0.267014	-0.650494	-0.512604	-0.523766	-0.433647	-0.543579	-0.586941	-0.554225	-0.604605	-0.171412	-0.53556	-0.511105	-0.539353	-0.518472	-0.5123	-0.557951	-0.4887	-0.485461	-0.510715	-0.461575	-0.545715	-0.574973	-0.552275	-0.817041	-0.542545	-0.588582	0.895079	0.85347	-0.612303	-0.275153	0.868121	0.603778	0.684326	0.374211	0.296736	-0.442835	-0.766636	0.463964	0.0279366	0.180761	0.170179	0.145439	0.279549	-0.378299	0.161226	0.43412
TraesCS2A03G0367000	P0101++C11++K00	0.513087	0.762637	-0.170175	-0.605459	-0.664816	-0.504029	-0.500435	-0.479343	-0.562117	-0.633159	-0.43855	-0.301308	-0.558208	-0.504627	-0.515082	-0.47788	-0.65128	-0.49744	-0.537592	-0.524242	-0.556609	-0.619658	-0.526633	-0.553374	-0.50835	-0.473853	-0.530904	-0.483156	0.345573	0.290198	-0.582565	-0.668272	0.31413	0.422951	0.321503	0.104367	-0.0379304	-0.51489	-0.490841	0.588653	0.358607	0.28727	0.485711	0.495137	0.51908	-0.280175	0.4379	0.523288
TraesCS2A03G0593000	P0101++C11++K00	0.491088	0.806168	-0.239109	-0.598516	-0.666337	-0.47912	-0.467372	-0.454355	-0.566232	-0.65252	-0.424954	-0.347656	-0.533338	-0.480673	-0.503412	-0.479308	-0.699455	-0.476588	-0.51884	-0.509532	-0.552933	-0.621232	-0.523258	-0.550938	-0.488008	-0.493559	-0.518016	-0.467391	0.374185	0.306465	-0.58409	-0.670121	0.338921	0.411377	0.311551	0.0798433	-0.0598337	-0.486174	-0.502275	0.576413	0.32942	0.238939	0.449475	0.477072	0.485413	-0.312021	0.403704	0.494945
TraesCS2A03G0862400	P0101++C11++K00	0.683187	0.92693	-0.138053	-0.817272	-0.716231	-0.689921	-0.620697	-0.704706	-0.768617	-0.683933	-0.734309	-0.245965	-0.706972	-0.684043	-0.716727	-0.700351	-0.623502	-0.720375	-0.674029	-0.67463	-0.702253	-0.663557	-0.729698	-0.728061	-0.720067	-0.916588	-0.714104	-0.74448	0.936255	0.847572	-0.784816	-0.49468	0.914277	0.723182	0.673112	0.385966	0.294604	-0.634217	-0.884657	0.636733	0.170086	0.349707	0.375412	0.340963	0.497929	-0.337369	0.357876	0.6068
TraesCS2A03G0994800	P0101++C11++K00	0.566618	0.898591	-0.244317	-0.724715	-0.601705	-0.578653	-0.504282	-0.605242	-0.660992	-0.616985	-0.643023	-0.23262	-0.598645	-0.572686	-0.606139	-0.594648	-0.550972	-0.620452	-0.554172	-0.555686	-0.590021	-0.536456	-0.620359	-0.626465	-0.616038	-0.852419	-0.602798	-0.645594	0.906734	0.835908	-0.678199	-0.354849	0.878287	0.635092	0.65076	0.362806	0.266008	-0.51508	-0.809337	0.523688	0.0597498	0.228524	0.24009	0.213186	0.359296	-0.377422	0.226152	0.486922
TraesCS2A03G1086200	P0101++C11++K00	0.392634	0.679209	-0.225834	-0.494265	-0.360146	-0.390443	-0.290976	-0.409926	-0.451676	-0.37092	-0.486702	-0.0445752	-0.382603	-0.384016	-0.420531	-0.418038	-0.352673	-0.413461	-0.359588	-0.364793	-0.386339	-0.314131	-0.412459	-0.422713	-0.409481	-0.717743	-0.419842	-0.46923	0.837503	0.824083	-0.483543	-0.11707	0.823671	0.529782	0.627093	0.408677	0.37416	-0.305028	-0.658422	0.349171	-0.00909595	0.127833	0.0726242	0.0608151	0.153164	-0.247815	0.081393	0.322887
TraesCS2B03G0102400	P0101++C11++K00	0.543169	0.888164	-0.260967	-0.679527	-0.562949	-0.546986	-0.458342	-0.562117	-0.623083	-0.577569	-0.616881	-0.18072	-0.560012	-0.538296	-0.572648	-0.557049	-0.551166	-0.575556	-0.523212	-0.522721	-0.552432	-0.507962	-0.577546	-0.597364	-0.573018	-0.834981	-0.57512	-0.611464	0.899445	0.852803	-0.651141	-0.335228	0.874082	0.628716	0.679459	0.384736	0.301588	-0.472238	-0.786994	0.511218	0.0795112	0.211151	0.221196	0.205458	0.324135	-0.356262	0.211233	0.472062
TraesCS2B03G0488200	P0101++C11++K00	0.550441	0.912944	-0.27735	-0.688726	-0.582702	-0.559444	-0.471111	-0.569341	-0.638376	-0.630688	-0.631707	-0.23021	-0.575595	-0.548355	-0.582811	-0.563692	-0.608756	-0.587362	-0.538069	-0.534031	-0.567241	-0.538583	-0.595394	-0.630654	-0.585338	-0.840861	-0.589646	-0.618869	0.895506	0.838155	-0.661337	-0.371512	0.863983	0.627508	0.673045	0.346455	0.271973	-0.485208	-0.794264	0.523763	0.0826896	0.205374	0.228384	0.213748	0.329788	-0.39698	0.214221	0.477536
TraesCS2B03G0580500	P0101++C11++K00	0.452177	0.760493	-0.238363	-0.566084	-0.43673	-0.451247	-0.353633	-0.468939	-0.52003	-0.444866	-0.539268	-0.0928276	-0.449688	-0.443608	-0.480458	-0.474352	-0.428351	-0.476359	-0.422551	-0.426337	-0.450393	-0.388083	-0.477075	-0.489704	-0.472892	-0.769991	-0.480366	-0.525798	0.871357	0.844943	-0.550917	-0.198414	0.85434	0.572111	0.652785	0.40487	0.352951	-0.368	-0.713653	0.410687	0.0229243	0.159809	0.126745	0.11466	0.21787	-0.285877	0.129608	0.380486
TraesCS2D03G0347900	P0101++C11++K00	0.473892	0.741165	-0.193962	-0.581888	-0.450673	-0.474955	-0.379784	-0.493372	-0.542037	-0.451308	-0.563608	-0.0977307	-0.470217	-0.467362	-0.504118	-0.499561	-0.424465	-0.500913	-0.445645	-0.450232	-0.471962	-0.407529	-0.502942	-0.510208	-0.497441	-0.78624	-0.50222	-0.549413	0.885555	0.848463	-0.568255	-0.209848	0.870865	0.58987	0.648855	0.406765	0.364715	-0.39362	-0.731911	0.421481	0.027802	0.187715	0.144388	0.125526	0.241024	-0.271483	0.148279	0.397398
TraesCS2D03G0389100	P0101++C11++K00	0.530399	0.955796	-0.343344	-0.69944	-0.595205	-0.551478	-0.473612	-0.565216	-0.646244	-0.684002	-0.618654	-0.342235	-0.579366	-0.534624	-0.56696	-0.548516	-0.671126	-0.59514	-0.526873	-0.520762	-0.559069	-0.554155	-0.59975	-0.646514	-0.589836	-0.818783	-0.572406	-0.601494	0.849705	0.764702	-0.655861	-0.411622	0.809716	0.572429	0.617004	0.238838	0.139944	-0.482619	-0.775227	0.496982	0.0310013	0.150643	0.203814	0.194867	0.329852	-0.489721	0.181235	0.448197
TraesCS2D03G0746300	P0101++C11++K00	0.720711	0.981525	-0.149319	-0.837832	-0.790254	-0.714746	-0.653146	-0.709305	-0.789335	-0.737811	-0.724255	-0.250473	-0.742541	-0.711512	-0.741278	-0.712171	-0.712576	-0.723803	-0.718548	-0.713472	-0.743485	-0.736937	-0.745616	-0.75637	-0.730075	-0.878826	-0.7485	-0.748437	0.851254	0.779461	-0.817826	-0.626625	0.826406	0.730511	0.661063	0.373743	0.262788	-0.67217	-0.859688	0.722955	0.30262	0.395175	0.484774	0.464909	0.575173	-0.323695	0.456487	0.674296
TraesCS2D03G0826700	P0101++C11++K00	0.574173	0.89469	-0.231693	-0.705728	-0.59277	-0.58427	-0.496673	-0.595383	-0.659263	-0.626301	-0.657218	-0.222077	-0.596239	-0.572556	-0.60602	-0.587517	-0.596032	-0.612986	-0.560065	-0.556968	-0.585672	-0.552788	-0.618681	-0.647468	-0.610589	-0.860678	-0.610563	-0.643802	0.915758	0.851693	-0.679591	-0.376567	0.88817	0.649097	0.67985	0.359298	0.291459	-0.509775	-0.815334	0.533367	0.0868313	0.23487	0.244202	0.22226	0.353358	-0.378214	0.23191	0.496406
TraesCS2D03G1058400	P0101++C11++K00	0.527555	0.966514	-0.357346	-0.681567	-0.606516	-0.524518	-0.44243	-0.531936	-0.623381	-0.634411	-0.575257	-0.24487	-0.55238	-0.519429	-0.559481	-0.545787	-0.641267	-0.54899	-0.518386	-0.517036	-0.561286	-0.541187	-0.568902	-0.596952	-0.549861	-0.798325	-0.56634	-0.581766	0.833024	0.785893	-0.655026	-0.414662	0.798374	0.592648	0.636037	0.329542	0.218441	-0.461262	-0.754192	0.540425	0.121709	0.17584	0.249328	0.257793	0.335345	-0.398418	0.230157	0.472445
TraesCS2D03G1214900	P0101++C11++K00	0.6059	0.943298	-0.243665	-0.736866	-0.658275	-0.604867	-0.521798	-0.608868	-0.69436	-0.665617	-0.659424	-0.236852	-0.622766	-0.59938	-0.639265	-0.624419	-0.652512	-0.624619	-0.597832	-0.596615	-0.633626	-0.609263	-0.648763	-0.669842	-0.626825	-0.86592	-0.645158	-0.661857	0.898776	0.834167	-0.720151	-0.458286	0.870081	0.66992	0.667473	0.366495	0.285697	-0.541231	-0.825378	0.596763	0.162168	0.266061	0.313146	0.304311	0.405757	-0.358776	0.296815	0.541917
TraesCS3A03G0832100	P0101++C11++K00	0.562413	0.829354	-0.179935	-0.681622	-0.557157	-0.565722	-0.476823	-0.582226	-0.637788	-0.545702	-0.63996	-0.154814	-0.568534	-0.557214	-0.592526	-0.582337	-0.511429	-0.593789	-0.539316	-0.542029	-0.564902	-0.5114	-0.59672	-0.603056	-0.591162	-0.852275	-0.590633	-0.632899	0.923438	0.867174	-0.661326	-0.322405	0.906206	0.651213	0.675981	0.405284	0.342747	-0.49039	-0.804793	0.508894	0.0800853	0.249674	0.231456	0.207086	0.342107	-0.305876	0.227451	0.483864
TraesCS3A03G1036100	P0101++C11++K00	0.525324	0.893712	-0.28712	-0.660945	-0.55601	-0.523444	-0.432416	-0.535697	-0.608129	-0.566347	-0.591668	-0.176737	-0.536724	-0.516574	-0.555226	-0.543813	-0.558791	-0.548532	-0.505457	-0.506527	-0.539924	-0.498656	-0.558488	-0.577431	-0.547409	-0.820053	-0.558274	-0.589299	0.884668	0.843024	-0.639598	-0.33627	0.859269	0.614909	0.668562	0.382207	0.297367	-0.449221	-0.770314	0.506919	0.0881773	0.193646	0.214829	0.209963	0.3093	-0.348023	0.205729	0.459387
TraesCS3B03G1352700	P0101++C11++K00	0.560814	0.971359	-0.323786	-0.715711	-0.728292	-0.555887	-0.513247	-0.550865	-0.674751	-0.754836	-0.556642	-0.381256	-0.604812	-0.560659	-0.602982	-0.593064	-0.758354	-0.572626	-0.585213	-0.582423	-0.643722	-0.664845	-0.62853	-0.65055	-0.580776	-0.717696	-0.612796	-0.588674	0.668361	0.581397	-0.691249	-0.611831	0.623744	0.552331	0.475904	0.198867	0.0744746	-0.536909	-0.699913	0.625444	0.242113	0.231348	0.393383	0.412605	0.454101	-0.396925	0.356083	0.528525
TraesCS3D03G0047400	P0101++C11++K00	0.620556	0.874198	-0.157642	-0.744426	-0.621726	-0.631813	-0.548207	-0.645337	-0.703081	-0.622124	-0.700017	-0.218324	-0.638716	-0.618723	-0.650087	-0.633062	-0.582515	-0.663395	-0.603335	-0.602319	-0.623057	-0.586338	-0.664108	-0.679069	-0.660236	-0.892317	-0.649503	-0.688987	0.9403	0.861863	-0.71868	-0.403334	0.920047	0.682686	0.683587	0.372067	0.305265	-0.559133	-0.850791	0.555477	0.0992546	0.287224	0.281684	0.249248	0.408754	-0.349664	0.271183	0.535184
TraesCS3D03G0865700	P0101++C11++K00	0.591067	0.899667	-0.217161	-0.711367	-0.74916	-0.581401	-0.557235	-0.564265	-0.672628	-0.72377	-0.544151	-0.346504	-0.631553	-0.584095	-0.611904	-0.588106	-0.737331	-0.584489	-0.614566	-0.607325	-0.652285	-0.695791	-0.629798	-0.648358	-0.595111	-0.642903	-0.623619	-0.586251	0.545812	0.466971	-0.691825	-0.692301	0.510641	0.535232	0.425063	0.174416	0.038196	-0.577596	-0.644282	0.656674	0.336403	0.305623	0.488937	0.501022	0.542635	-0.329448	0.445868	0.578231
TraesCS3D03G0964600	P0101++C11++K00	0.542161	0.888205	-0.262171	-0.675293	-0.5671	-0.541885	-0.451869	-0.554674	-0.625143	-0.572497	-0.610351	-0.18112	-0.55344	-0.534309	-0.572336	-0.561009	-0.559728	-0.568077	-0.522359	-0.523649	-0.554894	-0.513073	-0.577117	-0.593542	-0.566677	-0.834136	-0.574244	-0.607108	0.896958	0.848753	-0.653991	-0.346101	0.87307	0.628142	0.671093	0.383709	0.302495	-0.467928	-0.785512	0.515259	0.0902599	0.211144	0.22639	0.217063	0.326634	-0.343765	0.217643	0.472623
TraesCS4A03G0856100	P0101++C11++K00	0.574901	0.975954	-0.312115	-0.719483	-0.707869	-0.569582	-0.521591	-0.561637	-0.662117	-0.711032	-0.562781	-0.320798	-0.616564	-0.566077	-0.595042	-0.568284	-0.728796	-0.583216	-0.583538	-0.575796	-0.619681	-0.645425	-0.609955	-0.641095	-0.588966	-0.711654	-0.606719	-0.590426	0.659496	0.598113	-0.689507	-0.603274	0.621663	0.558626	0.529977	0.229061	0.082681	-0.539509	-0.695296	0.621629	0.252339	0.243852	0.398228	0.410428	0.470875	-0.394797	0.360473	0.546852
TraesCS4A03G0858900	P0101++C11++K00	0.530813	0.877245	-0.264315	-0.657486	-0.55067	-0.526929	-0.43406	-0.538219	-0.604974	-0.551555	-0.596017	-0.147822	-0.537134	-0.520895	-0.558727	-0.545879	-0.53966	-0.548242	-0.508584	-0.509634	-0.540458	-0.49383	-0.557064	-0.573973	-0.547689	-0.822753	-0.562239	-0.593862	0.892305	0.857501	-0.639236	-0.325391	0.869258	0.627318	0.681566	0.406794	0.328577	-0.451416	-0.772978	0.511677	0.100136	0.20949	0.221474	0.213338	0.310807	-0.324863	0.214252	0.466926
TraesCS4B03G0828000	P0101++C11++K00	0.458516	0.79321	-0.263761	-0.577736	-0.456706	-0.455347	-0.357906	-0.471409	-0.528496	-0.466654	-0.53931	-0.102452	-0.457785	-0.449192	-0.487509	-0.480563	-0.454043	-0.478695	-0.430942	-0.434267	-0.462357	-0.40291	-0.483295	-0.497911	-0.476277	-0.774258	-0.488989	-0.529675	0.870562	0.846752	-0.562156	-0.220157	0.850827	0.57724	0.658114	0.40678	0.346809	-0.373948	-0.718308	0.429709	0.0399622	0.158924	0.140611	0.133045	0.226094	-0.29688	0.141058	0.391296
TraesCS4B03G0940000	P0101++C11++K00	0.45034	0.75768	-0.237672	-0.556898	-0.432651	-0.447485	-0.347439	-0.461669	-0.510832	-0.444962	-0.536315	-0.0744114	-0.445308	-0.440771	-0.477213	-0.467916	-0.428438	-0.466907	-0.420959	-0.42323	-0.447573	-0.385196	-0.469514	-0.487077	-0.464641	-0.765238	-0.480212	-0.52184	0.869204	0.852057	-0.545402	-0.194725	0.851318	0.577494	0.664119	0.419431	0.374503	-0.363243	-0.708802	0.41772	0.0394942	0.164548	0.13159	0.119601	0.211127	-0.277102	0.13451	0.383742
TraesCS4D03G0229100	P0101++C11++K00	0.612324	0.997446	-0.290396	-0.75993	-0.722602	-0.611604	-0.551888	-0.608815	-0.708156	-0.732408	-0.626856	-0.323483	-0.650251	-0.606249	-0.639805	-0.617175	-0.73584	-0.63116	-0.617425	-0.611711	-0.654595	-0.665949	-0.657853	-0.686391	-0.635209	-0.796965	-0.648828	-0.644889	0.769472	0.695162	-0.73143	-0.582553	0.733014	0.617438	0.587995	0.269502	0.142552	-0.569845	-0.772496	0.634194	0.220453	0.262895	0.383764	0.386467	0.472906	-0.406293	0.351497	0.566214
TraesCS4D03G0668900	P0101++C11++K00	0.409731	0.691353	-0.218237	-0.511162	-0.37859	-0.40698	-0.308017	-0.42587	-0.468397	-0.384047	-0.500981	-0.0473123	-0.399628	-0.400948	-0.437571	-0.434348	-0.363818	-0.429251	-0.377154	-0.382297	-0.403881	-0.331859	-0.429121	-0.438035	-0.425708	-0.730951	-0.436898	-0.485277	0.847296	0.832048	-0.500601	-0.134631	0.833624	0.544515	0.634792	0.415742	0.379567	-0.322485	-0.672659	0.366787	0.00414188	0.142927	0.0901882	0.0771521	0.171313	-0.246653	0.0981912	0.340278
TraesCS4D03G0738600	P0101++C11++K00	0.491001	0.850439	-0.28348	-0.619755	-0.507721	-0.487861	-0.393035	-0.501818	-0.567728	-0.518709	-0.56383	-0.139514	-0.49639	-0.481629	-0.520541	-0.511272	-0.51002	-0.511734	-0.467292	-0.469446	-0.501069	-0.450755	-0.519584	-0.536982	-0.510119	-0.797781	-0.523162	-0.558381	0.878567	0.847394	-0.601261	-0.278998	0.855435	0.596316	0.665996	0.396374	0.322288	-0.409846	-0.744526	0.470155	0.065612	0.17356	0.177376	0.172448	0.265959	-0.324963	0.172801	0.425334
TraesCS4D03G0748700	P0101++C11++K00	0.481344	0.861291	-0.305483	-0.620191	-0.512027	-0.47762	-0.38556	-0.494177	-0.568511	-0.521768	-0.551272	-0.162347	-0.488859	-0.472562	-0.51452	-0.510713	-0.517925	-0.505663	-0.459616	-0.463917	-0.499593	-0.450305	-0.517505	-0.529897	-0.503824	-0.792141	-0.514805	-0.549754	0.86948	0.831261	-0.599792	-0.284805	0.845343	0.581688	0.644742	0.377808	0.29488	-0.402815	-0.738522	0.463439	0.0545325	0.157237	0.170453	0.171197	0.263165	-0.33437	0.165226	0.414439
TraesCS5A03G0028100	P0101++C11++K00	0.588278	0.881653	-0.202368	-0.714375	-0.602975	-0.59016	-0.503524	-0.603156	-0.66861	-0.592805	-0.655798	-0.185748	-0.598968	-0.582234	-0.618562	-0.606062	-0.565464	-0.616593	-0.569335	-0.570771	-0.597781	-0.554126	-0.624636	-0.634635	-0.615336	-0.867013	-0.618658	-0.653346	0.922833	0.862595	-0.693327	-0.378724	0.90208	0.665566	0.680537	0.395765	0.320959	-0.518637	-0.822251	0.547586	0.111069	0.26144	0.267362	0.247542	0.376073	-0.328263	0.258503	0.513914
TraesCS5A03G0532400	P0101++C11++K00	0.545467	0.905294	-0.275442	-0.679543	-0.576527	-0.544441	-0.454383	-0.55501	-0.627459	-0.585832	-0.610146	-0.185626	-0.558329	-0.536894	-0.574497	-0.560675	-0.57663	-0.568619	-0.52676	-0.52679	-0.559267	-0.521568	-0.578557	-0.599154	-0.567823	-0.832768	-0.578286	-0.607648	0.891211	0.846036	-0.658189	-0.36052	0.865565	0.629373	0.675411	0.381949	0.29699	-0.471029	-0.784916	0.525852	0.102429	0.210969	0.235298	0.227982	0.331479	-0.352292	0.224671	0.479299
TraesCS5A03G0564900	P0101++C11++K00	0.5002	0.763514	-0.185933	-0.613462	-0.480555	-0.504176	-0.411347	-0.523205	-0.574617	-0.480383	-0.590364	-0.127332	-0.500944	-0.494913	-0.531187	-0.526237	-0.451994	-0.533763	-0.473614	-0.477974	-0.499143	-0.439616	-0.534991	-0.541741	-0.529731	-0.809107	-0.528089	-0.576064	0.899598	0.850273	-0.596874	-0.243245	0.884524	0.604559	0.650831	0.39397	0.346752	-0.424031	-0.756594	0.44003	0.0302921	0.202561	0.163699	0.142255	0.271559	-0.28905	0.165506	0.41885
TraesCS5A03G0796200	P0101++C11++K00	0.624695	0.991837	-0.270501	-0.759011	-0.731098	-0.616433	-0.55724	-0.607614	-0.707538	-0.708566	-0.618371	-0.291044	-0.653984	-0.610816	-0.642043	-0.616111	-0.731989	-0.628153	-0.624922	-0.619028	-0.656247	-0.674055	-0.652855	-0.678054	-0.633819	-0.780948	-0.651685	-0.642367	0.741367	0.678423	-0.737808	-0.610632	0.710309	0.620787	0.590147	0.283822	0.147353	-0.576112	-0.760144	0.65232	0.264423	0.285964	0.417389	0.424466	0.501649	-0.372823	0.384956	0.588243
TraesCS5A03G0796300	P0101++C11++K00	0.473931	0.968777	-0.421529	-0.63619	-0.610772	-0.484613	-0.431802	-0.478598	-0.566684	-0.716238	-0.500469	-0.355527	-0.53853	-0.474794	-0.497239	-0.459948	-0.725373	-0.505301	-0.487865	-0.471691	-0.520881	-0.556096	-0.520356	-0.590832	-0.507113	-0.647219	-0.517813	-0.504778	0.614785	0.566272	-0.590087	-0.507671	0.561765	0.472824	0.517409	0.160186	0.0240791	-0.44469	-0.624109	0.526932	0.154406	0.127299	0.278613	0.290987	0.342938	-0.493713	0.237103	0.442696
TraesCS5A03G1073800	P0101++C11++K00	0.474972	0.81547	-0.26702	-0.59921	-0.480976	-0.472882	-0.377399	-0.488983	-0.549536	-0.492471	-0.554218	-0.123553	-0.477782	-0.466794	-0.505557	-0.498377	-0.477734	-0.497669	-0.449848	-0.452931	-0.482781	-0.426315	-0.504002	-0.518698	-0.495404	-0.787939	-0.506954	-0.546151	0.877712	0.847398	-0.581533	-0.245695	0.856408	0.587253	0.659006	0.400088	0.335562	-0.393523	-0.733323	0.447167	0.0474413	0.167578	0.156738	0.148844	0.245418	-0.309967	0.155082	0.406697
TraesCS5A03G1113800	P0101++C11++K00	0.593445	0.945175	-0.259923	-0.717675	-0.741645	-0.574781	-0.536095	-0.559713	-0.667399	-0.697834	-0.545841	-0.284433	-0.622299	-0.579929	-0.611875	-0.588556	-0.718827	-0.574151	-0.606208	-0.601127	-0.647429	-0.67254	-0.616734	-0.631131	-0.585216	-0.680634	-0.623811	-0.59187	0.609001	0.55547	-0.700981	-0.652418	0.575812	0.569385	0.495984	0.254364	0.108873	-0.559817	-0.672839	0.667977	0.340601	0.298085	0.472331	0.490088	0.518552	-0.315484	0.433974	0.58428
TraesCS5A03G1156200	P0101++C11++K00	0.457941	0.793178	-0.264393	-0.577708	-0.456745	-0.45492	-0.357644	-0.471168	-0.528767	-0.467102	-0.539005	-0.104578	-0.457412	-0.448765	-0.48728	-0.480735	-0.454616	-0.478641	-0.430568	-0.434022	-0.462321	-0.403008	-0.483524	-0.497916	-0.476174	-0.77421	-0.488591	-0.529359	0.870399	0.845713	-0.562042	-0.220313	0.850597	0.576319	0.656479	0.404962	0.344953	-0.373668	-0.718217	0.428863	0.0385186	0.157905	0.139756	0.132382	0.225761	-0.297761	0.140205	0.390355
TraesCS5B03G0571900	P0101++C11++K00	0.495543	0.797271	-0.225067	-0.613576	-0.491547	-0.497098	-0.402059	-0.512524	-0.575352	-0.500732	-0.581714	-0.144975	-0.497171	-0.488119	-0.527174	-0.52244	-0.487921	-0.524505	-0.471193	-0.474937	-0.500746	-0.449389	-0.531989	-0.544927	-0.521557	-0.807742	-0.526457	-0.568128	0.893803	0.846284	-0.599922	-0.26379	0.875435	0.599262	0.651154	0.38279	0.330429	-0.416855	-0.75416	0.449349	0.0403418	0.186764	0.165334	0.152813	0.267445	-0.308048	0.165093	0.418041
TraesCS5B03G0828400	P0101++C11++K00	0.574462	0.994997	-0.331666	-0.726483	-0.667177	-0.571189	-0.498738	-0.573444	-0.667434	-0.679562	-0.602425	-0.274516	-0.604971	-0.565392	-0.601231	-0.581237	-0.688485	-0.592783	-0.56964	-0.565867	-0.608068	-0.603169	-0.612589	-0.640938	-0.595074	-0.802048	-0.60924	-0.615933	0.805756	0.750167	-0.697953	-0.500261	0.770975	0.609869	0.625291	0.310053	0.183778	-0.516904	-0.76729	0.592051	0.17556	0.220355	0.319397	0.325734	0.408284	-0.403384	0.2935	0.525259
TraesCS5B03G0828500	P0101++C11++K00	0.514571	0.98039	-0.386214	-0.689639	-0.643048	-0.524677	-0.477281	-0.530369	-0.610522	-0.701684	-0.533718	-0.345871	-0.578264	-0.516329	-0.538241	-0.50642	-0.69118	-0.555764	-0.521986	-0.511046	-0.556163	-0.573062	-0.560605	-0.605302	-0.555415	-0.6884	-0.549337	-0.549994	0.655756	0.597055	-0.632555	-0.51316	0.609637	0.50551	0.530609	0.194117	0.0340902	-0.48751	-0.666421	0.544903	0.147158	0.163263	0.302595	0.306395	0.391532	-0.473174	0.262905	0.475081
TraesCS5D03G0225200	P0101++C11++K00	0.584676	0.965723	-0.290598	-0.73327	-0.719496	-0.585662	-0.543928	-0.579539	-0.681522	-0.727958	-0.576947	-0.364172	-0.633178	-0.579239	-0.606628	-0.581523	-0.742954	-0.606034	-0.596769	-0.589061	-0.630981	-0.664904	-0.631193	-0.66136	-0.610313	-0.713138	-0.615709	-0.601642	0.649471	0.567957	-0.699392	-0.626653	0.611836	0.549712	0.501752	0.187059	0.0405646	-0.558923	-0.700021	0.615791	0.235335	0.248144	0.402861	0.411037	0.491781	-0.412602	0.363367	0.548387
TraesCS5D03G0752600	P0101++C11++K00	0.623384	0.974591	-0.254769	-0.76129	-0.747753	-0.620844	-0.575207	-0.612412	-0.710752	-0.740881	-0.613388	-0.33427	-0.664801	-0.61678	-0.645167	-0.617874	-0.745383	-0.634779	-0.634111	-0.626416	-0.667153	-0.692696	-0.662954	-0.689494	-0.640813	-0.751097	-0.655476	-0.640198	0.692402	0.615966	-0.732881	-0.640447	0.656823	0.599257	0.540548	0.237298	0.100915	-0.592624	-0.73799	0.65655	0.271831	0.293279	0.438662	0.440959	0.519921	-0.385222	0.400746	0.58908
TraesCS5D03G1149600	P0101++C11++K00	0.664401	0.937019	-0.169835	-0.776456	-0.694123	-0.655842	-0.57373	-0.657877	-0.725654	-0.648098	-0.697288	-0.162283	-0.670369	-0.653056	-0.687488	-0.664653	-0.619237	-0.665863	-0.64856	-0.647095	-0.674877	-0.637343	-0.681346	-0.689535	-0.669919	-0.892235	-0.693026	-0.710426	0.92101	0.873855	-0.761854	-0.481615	0.900418	0.729743	0.71553	0.446556	0.359662	-0.59375	-0.856922	0.653586	0.231506	0.346458	0.383758	0.363193	0.469597	-0.294661	0.368508	0.609798
TraesCS5D03G1149800	P0101++C11++K00	0.54955	0.909228	-0.274663	-0.686429	-0.583735	-0.548884	-0.460379	-0.560439	-0.634641	-0.590555	-0.613164	-0.194858	-0.563484	-0.541473	-0.579559	-0.56707	-0.580774	-0.574747	-0.531537	-0.532181	-0.565201	-0.52789	-0.585269	-0.603516	-0.573797	-0.83587	-0.582295	-0.612021	0.89168	0.842289	-0.663966	-0.368057	0.866105	0.6298	0.670111	0.376675	0.288828	-0.476842	-0.788567	0.528425	0.101288	0.212744	0.239162	0.232012	0.338639	-0.354781	0.228119	0.482136
TraesCS6B03G0877600	P0101++C11++K00	0.610497	0.86989	-0.164949	-0.732183	-0.624012	-0.616887	-0.532777	-0.628831	-0.697414	-0.62263	-0.685822	-0.217158	-0.623347	-0.608263	-0.645777	-0.635223	-0.586903	-0.644679	-0.597029	-0.598356	-0.625521	-0.58616	-0.658712	-0.669059	-0.643627	-0.886841	-0.64545	-0.679009	0.937656	0.859175	-0.713903	-0.40347	0.916426	0.681119	0.668914	0.377349	0.318816	-0.547728	-0.844141	0.560489	0.112323	0.283945	0.283961	0.258461	0.398127	-0.331609	0.274826	0.529114
TraesCS6D03G0772300	P0101++C11++K00	0.588616	0.992217	-0.312542	-0.73649	-0.709094	-0.584496	-0.529065	-0.579753	-0.678793	-0.712942	-0.588894	-0.313094	-0.627536	-0.579923	-0.610995	-0.58592	-0.726452	-0.601227	-0.593308	-0.586737	-0.629773	-0.646608	-0.625689	-0.655379	-0.605873	-0.752962	-0.621231	-0.612379	0.715902	0.652854	-0.706431	-0.584299	0.679114	0.585817	0.565945	0.256266	0.11498	-0.54693	-0.731375	0.623765	0.233193	0.24651	0.384224	0.39313	0.465195	-0.401109	0.34962	0.552465
TraesCS6D03G0772500	P0101++C11++K00	0.675903	0.922786	-0.14232	-0.803148	-0.704721	-0.683815	-0.608924	-0.693021	-0.766472	-0.686301	-0.734519	-0.264732	-0.696878	-0.673642	-0.707873	-0.692242	-0.650226	-0.712931	-0.666593	-0.666229	-0.691814	-0.666782	-0.725857	-0.734196	-0.712526	-0.917243	-0.706957	-0.734926	0.936394	0.841402	-0.779764	-0.503006	0.914802	0.713851	0.669072	0.358452	0.279396	-0.622602	-0.883127	0.623665	0.159577	0.33456	0.359891	0.330808	0.486941	-0.351514	0.343537	0.595107
TraesCS7A03G0380300	P0101++C11++K00	0.563934	0.994952	-0.343777	-0.715276	-0.663907	-0.561979	-0.488888	-0.56163	-0.661315	-0.694992	-0.596631	-0.292507	-0.596357	-0.556266	-0.593873	-0.574465	-0.707195	-0.582203	-0.563396	-0.558645	-0.604229	-0.604987	-0.608275	-0.643404	-0.58514	-0.79518	-0.604139	-0.606494	0.798444	0.739698	-0.68966	-0.503439	0.760478	0.600815	0.614593	0.291965	0.174916	-0.50816	-0.759946	0.588078	0.172889	0.208345	0.311891	0.321004	0.39495	-0.415618	0.285188	0.514954
TraesCS7A03G0517200	P0101++C11++K00	0.558159	0.833831	-0.189324	-0.683035	-0.557149	-0.564008	-0.476601	-0.582172	-0.638474	-0.554513	-0.639413	-0.171694	-0.568408	-0.555051	-0.590369	-0.58082	-0.51705	-0.595199	-0.536823	-0.539407	-0.563712	-0.511318	-0.597835	-0.605393	-0.59193	-0.851529	-0.588067	-0.631336	0.921818	0.860732	-0.659396	-0.321855	0.902875	0.644249	0.668522	0.39147	0.327269	-0.489387	-0.803986	0.502899	0.0674633	0.240566	0.223886	0.199163	0.338063	-0.32041	0.21895	0.477166
TraesCS7A03G1216800	P0101++C11++K00	0.707774	0.949641	-0.132374	-0.8139	-0.816394	-0.699589	-0.659257	-0.683299	-0.77132	-0.767188	-0.67877	-0.290225	-0.738388	-0.700245	-0.725874	-0.692103	-0.747183	-0.698542	-0.720981	-0.712167	-0.746833	-0.767059	-0.733131	-0.749086	-0.708938	-0.787644	-0.738192	-0.713983	0.714132	0.638491	-0.796468	-0.707861	0.684671	0.678648	0.566715	0.29939	0.182819	-0.679771	-0.784344	0.74409	0.372799	0.410301	0.548067	0.534681	0.613467	-0.30987	0.50983	0.682304
TraesCS7B03G0198800	P0101++C11++K00	0.639728	0.924894	-0.1862	-0.766259	-0.672067	-0.644341	-0.56387	-0.651856	-0.723265	-0.671411	-0.700753	-0.233007	-0.658844	-0.63686	-0.672229	-0.654187	-0.635431	-0.667695	-0.630093	-0.628277	-0.658607	-0.627906	-0.682973	-0.699632	-0.668388	-0.894219	-0.675829	-0.700314	0.927428	0.853737	-0.744296	-0.460877	0.901844	0.698809	0.682835	0.379686	0.305032	-0.580027	-0.856133	0.608129	0.158162	0.304081	0.330993	0.307118	0.436814	-0.351036	0.315371	0.567675
TraesCS7B03G0888400	P0101++C11++K00	0.625897	0.865587	-0.142864	-0.740443	-0.632044	-0.627673	-0.542386	-0.638136	-0.707628	-0.603885	-0.691603	-0.195741	-0.631161	-0.618906	-0.656538	-0.646897	-0.578558	-0.652883	-0.607848	-0.610701	-0.633733	-0.593742	-0.665737	-0.669004	-0.652352	-0.893748	-0.654456	-0.688415	0.941813	0.86599	-0.727199	-0.415629	0.925694	0.693933	0.676682	0.395197	0.332531	-0.557857	-0.851766	0.572001	0.131417	0.303689	0.30234	0.27815	0.419512	-0.305887	0.294966	0.546084
TraesCS7D03G0087400	P0101++C11++K00	0.459727	0.712719	-0.181872	-0.566597	-0.419275	-0.469559	-0.374554	-0.490394	-0.523656	-0.4441	-0.566323	-0.0986851	-0.463364	-0.457805	-0.488377	-0.477866	-0.402016	-0.499617	-0.430741	-0.432138	-0.448835	-0.384067	-0.490064	-0.506916	-0.493677	-0.776542	-0.487601	-0.541695	0.882367	0.844701	-0.545466	-0.175311	0.866392	0.576189	0.651496	0.391678	0.358495	-0.384013	-0.722031	0.39117	-0.00780421	0.175536	0.114706	0.0854096	0.218362	-0.291025	0.118592	0.376939
TraesCS7D03G0109900	P0101++C11++K00	0.545431	0.766786	-0.136977	-0.672052	-0.515456	-0.568469	-0.485988	-0.594921	-0.63278	-0.539232	-0.65718	-0.207094	-0.567394	-0.551478	-0.57936	-0.569137	-0.478489	-0.61458	-0.523957	-0.525206	-0.539699	-0.487989	-0.600745	-0.611709	-0.605907	-0.847728	-0.572561	-0.632391	0.923245	0.837148	-0.636631	-0.278993	0.90613	0.618803	0.640896	0.337762	0.289458	-0.490012	-0.800901	0.443463	-0.0132208	0.227996	0.175775	0.132746	0.321835	-0.348098	0.172689	0.442812
TraesCS7D03G0446000	P0101++C11++K00	0.625705	0.886707	-0.164205	-0.748035	-0.637308	-0.629083	-0.545848	-0.641387	-0.704309	-0.617126	-0.690282	-0.195043	-0.637553	-0.620963	-0.655703	-0.641168	-0.579929	-0.655188	-0.608391	-0.609341	-0.634	-0.591459	-0.662926	-0.669732	-0.654299	-0.890628	-0.655172	-0.689362	0.937478	0.868529	-0.726411	-0.413725	0.918033	0.693619	0.687268	0.401245	0.327986	-0.560409	-0.849598	0.578281	0.133104	0.299731	0.304598	0.277817	0.418389	-0.322392	0.294322	0.549335
TraesCS7D03G0803900	P0101++C11++K00	0.436491	0.704768	-0.200752	-0.542613	-0.405349	-0.438602	-0.342315	-0.459022	-0.502479	-0.41356	-0.532608	-0.0807731	-0.431678	-0.430394	-0.466234	-0.463019	-0.387306	-0.46588	-0.406075	-0.410991	-0.43135	-0.363341	-0.464352	-0.472727	-0.461338	-0.756604	-0.463893	-0.514764	0.865766	0.834655	-0.52846	-0.162913	0.851828	0.559758	0.634549	0.399341	0.36245	-0.354972	-0.700058	0.380698	-0.00143444	0.159124	0.105339	0.0871214	0.200366	-0.265285	0.111746	0.359376
TraesCS1A03G0114500	P1010++C22++K00	0.600143	-0.250908	0.943894	-0.441422	-0.426186	-0.61634	-0.667469	-0.603284	-0.519147	-0.162709	-0.559898	0.0556194	-0.565909	-0.614003	-0.583649	-0.562125	0.0176211	-0.593998	-0.606613	-0.607345	-0.533879	-0.51459	-0.582499	-0.489294	-0.600706	-0.343923	-0.562859	-0.573784	0.237399	0.102958	-0.471642	-0.426066	0.294208	0.478973	0.0796702	0.187233	0.307289	-0.65679	-0.406955	0.422335	0.365953	0.737457	0.59712	0.452416	0.676883	0.351223	0.601393	0.558022
TraesCS1A03G0186700	P1010++C22++K00	0.620456	-0.275554	0.991995	-0.392079	-0.442574	-0.58807	-0.630856	-0.549436	-0.450991	-0.062235	-0.491228	0.339891	-0.535558	-0.609124	-0.579289	-0.541407	0.10655	-0.505417	-0.614518	-0.61426	-0.541331	-0.492212	-0.512222	-0.402175	-0.527534	-0.276265	-0.573645	-0.547246	0.172898	0.151217	-0.459545	-0.433141	0.240378	0.553196	0.167509	0.427831	0.546716	-0.639217	-0.346892	0.549598	0.629484	0.855936	0.745038	0.615142	0.708786	0.579358	0.753017	0.652648
TraesCS1A03G0205600	P1010++C22++K00	0.540635	-0.337879	0.962151	-0.35019	-0.376488	-0.535412	-0.58024	-0.516233	-0.444325	-0.0933816	-0.486327	0.162957	-0.476214	-0.551564	-0.537501	-0.532022	0.0930616	-0.489216	-0.552593	-0.560188	-0.50217	-0.453648	-0.515434	-0.40458	-0.50411	-0.294564	-0.520352	-0.514122	0.220042	0.117822	-0.410201	-0.348488	0.278259	0.476623	0.0556773	0.273181	0.440296	-0.583954	-0.352387	0.418641	0.424305	0.740738	0.589559	0.459332	0.601357	0.479337	0.604223	0.52234
TraesCS1A03G0836400	P1010++C22++K00	0.556296	-0.310006	0.952362	-0.291433	-0.373173	-0.487514	-0.515575	-0.436443	-0.336565	0.082979	-0.374512	0.550703	-0.430427	-0.522335	-0.497471	-0.458232	0.211109	-0.370408	-0.533009	-0.536182	-0.464451	-0.391418	-0.386182	-0.262992	-0.400491	-0.191757	-0.498492	-0.455275	0.112372	0.1777	-0.386303	-0.356172	0.189415	0.541593	0.210048	0.574935	0.683892	-0.536421	-0.257389	0.554395	0.738052	0.849832	0.752302	0.648871	0.644456	0.726372	0.768934	0.635235
TraesCS1D03G0036500	P1010++C22++K00	0.637262	-0.246896	0.982743	-0.418712	-0.476211	-0.604633	-0.650422	-0.565731	-0.487161	-0.0851415	-0.501759	0.282691	-0.553561	-0.623542	-0.598173	-0.568118	0.0595313	-0.528235	-0.633463	-0.636148	-0.564816	-0.529518	-0.54166	-0.425647	-0.549987	-0.291439	-0.588345	-0.56026	0.171608	0.126826	-0.48901	-0.487101	0.240459	0.548514	0.139468	0.384202	0.49099	-0.658815	-0.363166	0.558978	0.62573	0.852901	0.759305	0.638364	0.742144	0.559232	0.765816	0.66256
TraesCS1D03G0805300	P1010++C22++K00	0.5452	-0.333564	0.963107	-0.283343	-0.348683	-0.485944	-0.514777	-0.439619	-0.32498	0.0793898	-0.38374	0.543781	-0.42803	-0.518519	-0.489394	-0.44642	0.233141	-0.374457	-0.523383	-0.524222	-0.450658	-0.371896	-0.381812	-0.265463	-0.402197	-0.192638	-0.49093	-0.455397	0.123518	0.184957	-0.368956	-0.31755	0.197764	0.535576	0.213772	0.565958	0.68646	-0.531981	-0.257335	0.528857	0.698545	0.839823	0.722399	0.606989	0.620177	0.705165	0.739187	0.616216
TraesCS2A03G0062000	P1010++C22++K00	0.674368	-0.187463	0.966156	-0.443084	-0.511105	-0.629618	-0.66656	-0.583284	-0.489937	-0.106907	-0.520899	0.379616	-0.582575	-0.656315	-0.628537	-0.582503	0.0579982	-0.532523	-0.667025	-0.664934	-0.597033	-0.544319	-0.546039	-0.437382	-0.559155	-0.318187	-0.628856	-0.590147	0.209234	0.212536	-0.515766	-0.491538	0.27449	0.618408	0.237082	0.505647	0.60886	-0.681313	-0.389697	0.638742	0.720715	0.903574	0.818396	0.693853	0.756875	0.594318	0.822705	0.724582
TraesCS2A03G0362900	P1010++C22++K00	0.557428	-0.304215	0.947877	-0.294831	-0.359257	-0.499078	-0.525456	-0.450522	-0.324173	0.0526714	-0.397488	0.565676	-0.445047	-0.532625	-0.499256	-0.445257	0.223889	-0.381938	-0.536281	-0.5325	-0.460039	-0.377427	-0.384434	-0.279712	-0.410508	-0.202218	-0.506653	-0.468274	0.136737	0.215356	-0.37505	-0.315922	0.206112	0.558057	0.25555	0.598957	0.718984	-0.543063	-0.267379	0.554526	0.721696	0.851725	0.736674	0.615056	0.619454	0.692172	0.750324	0.635866
TraesCS2A03G0643000	P1010++C22++K00	0.545711	-0.293523	0.923656	-0.278886	-0.351601	-0.480403	-0.503219	-0.42871	-0.301958	0.0665689	-0.375841	0.604651	-0.427842	-0.517241	-0.484671	-0.428042	0.232801	-0.355365	-0.522527	-0.518185	-0.448204	-0.361174	-0.360192	-0.257146	-0.385868	-0.18822	-0.495294	-0.451644	0.127665	0.227161	-0.362685	-0.304117	0.196254	0.559305	0.273092	0.631886	0.748163	-0.523843	-0.252161	0.563494	0.74832	0.847666	0.740349	0.624302	0.604076	0.709997	0.754184	0.635685
TraesCS2A03G1015600	P1010++C22++K00	0.570185	-0.256421	0.914814	-0.306482	-0.407354	-0.496214	-0.524335	-0.439203	-0.340448	0.0411801	-0.374198	0.56304	-0.447283	-0.535437	-0.510004	-0.462163	0.174228	-0.368972	-0.551163	-0.550638	-0.48574	-0.414589	-0.390077	-0.276164	-0.402244	-0.190626	-0.518015	-0.462395	0.103756	0.188325	-0.400424	-0.389232	0.174283	0.560725	0.237084	0.603444	0.703176	-0.549016	-0.258694	0.602437	0.794207	0.862918	0.791241	0.691432	0.657329	0.718845	0.802352	0.66528
TraesCS2A03G1132800	P1010++C22++K00	0.676066	-0.195164	0.975818	-0.480693	-0.502027	-0.665363	-0.708105	-0.63376	-0.548316	-0.167416	-0.583306	0.188264	-0.615064	-0.673373	-0.643331	-0.607574	-0.000529544	-0.608105	-0.675449	-0.673773	-0.599242	-0.572189	-0.607147	-0.509343	-0.624058	-0.368954	-0.632538	-0.620069	0.252934	0.173034	-0.533067	-0.50058	0.315093	0.575584	0.174231	0.3355	0.447954	-0.708652	-0.4373	0.554245	0.547947	0.844122	0.730678	0.59224	0.75552	0.453432	0.733764	0.672228
TraesCS2A03G1151600	P1010++C22++K00	0.466832	-0.270959	0.81001	-0.189763	-0.337379	-0.37562	-0.392323	-0.306368	-0.227616	0.0758958	-0.261288	0.626716	-0.329114	-0.426972	-0.413822	-0.370661	0.184151	-0.225179	-0.454937	-0.45413	-0.409106	-0.33401	-0.277377	-0.178501	-0.265453	-0.106116	-0.433908	-0.35383	0.0433012	0.173998	-0.305774	-0.31976	0.104108	0.507568	0.2203	0.633519	0.758654	-0.429736	-0.166237	0.575081	0.829578	0.788273	0.741073	0.66978	0.53502	0.754831	0.754856	0.592225
TraesCS2B03G0260600	P1010++C22++K00	0.51406	-0.384308	0.977893	-0.257794	-0.323223	-0.470129	-0.509206	-0.426761	-0.310019	0.0544551	-0.375458	0.468429	-0.413838	-0.498989	-0.467086	-0.425827	0.226055	-0.368849	-0.503924	-0.502446	-0.43054	-0.364056	-0.377239	-0.271312	-0.394099	-0.159047	-0.468379	-0.434361	0.0822159	0.115132	-0.335429	-0.307701	0.150595	0.486771	0.146433	0.475716	0.615633	-0.521715	-0.227238	0.481445	0.641468	0.809868	0.686424	0.563177	0.595735	0.661943	0.700375	0.57274
TraesCS2B03G0727900	P1010++C22++K00	0.544456	-0.314342	0.943025	-0.382367	-0.359573	-0.561831	-0.614471	-0.551994	-0.460351	-0.0979953	-0.508357	0.0778366	-0.508455	-0.558144	-0.525446	-0.506697	0.0779062	-0.542419	-0.547241	-0.549051	-0.471803	-0.449766	-0.524186	-0.429139	-0.54733	-0.289452	-0.50254	-0.518964	0.191221	0.0629298	-0.411393	-0.364617	0.250917	0.425755	0.0438763	0.165607	0.288213	-0.601221	-0.351179	0.358615	0.324624	0.697686	0.544902	0.4017	0.626272	0.366528	0.552549	0.501774
TraesCS2B03G1411500	P1010++C22++K00	0.548022	-0.200926	0.833727	-0.283118	-0.385292	-0.464541	-0.479887	-0.403318	-0.288755	0.0493379	-0.345226	0.659105	-0.421669	-0.509359	-0.481036	-0.417684	0.193087	-0.321518	-0.523039	-0.517061	-0.457675	-0.369428	-0.336805	-0.239409	-0.357531	-0.181522	-0.500007	-0.438164	0.118348	0.260588	-0.37386	-0.335644	0.18182	0.580652	0.324511	0.701206	0.791354	-0.5092	-0.243904	0.625029	0.83598	0.846096	0.782245	0.68571	0.604346	0.722598	0.791942	0.667034
TraesCS2D03G0033000	P1010++C22++K00	0.565648	-0.286176	0.93933	-0.405073	-0.387875	-0.581859	-0.634928	-0.569336	-0.484079	-0.120739	-0.523036	0.0611597	-0.530321	-0.577302	-0.544956	-0.525079	0.0457123	-0.561587	-0.569152	-0.570517	-0.493379	-0.478831	-0.54513	-0.451235	-0.567091	-0.302994	-0.522484	-0.535463	0.194659	0.0622318	-0.435499	-0.402713	0.254184	0.437746	0.0488891	0.159877	0.275354	-0.622193	-0.366327	0.382026	0.343595	0.709703	0.568895	0.428312	0.653542	0.357096	0.574407	0.523827
TraesCS2D03G0044500	P1010++C22++K00	0.563233	-0.307545	0.95791	-0.303251	-0.363745	-0.508327	-0.536428	-0.461307	-0.335514	0.0446128	-0.408148	0.545261	-0.453787	-0.540232	-0.506538	-0.453821	0.217946	-0.395174	-0.543174	-0.539642	-0.466153	-0.385973	-0.396605	-0.291274	-0.42279	-0.209453	-0.512391	-0.476503	0.14135	0.209602	-0.381565	-0.322589	0.210939	0.557318	0.24709	0.582137	0.703502	-0.552571	-0.275168	0.550486	0.708474	0.852983	0.734812	0.610703	0.627055	0.68197	0.748245	0.636006
TraesCS2D03G0045100	P1010++C22++K00	0.523778	-0.295267	0.900073	-0.387728	-0.350247	-0.554009	-0.608862	-0.551463	-0.470739	-0.126734	-0.511269	-0.0159677	-0.503411	-0.543751	-0.512756	-0.500909	0.0424409	-0.553093	-0.530866	-0.533532	-0.459023	-0.449123	-0.532127	-0.443074	-0.553595	-0.298332	-0.48546	-0.51086	0.197742	0.0370857	-0.406071	-0.363163	0.252875	0.388285	0.00781125	0.0821658	0.198848	-0.590753	-0.356775	0.313276	0.241718	0.642611	0.490862	0.349913	0.605094	0.289373	0.496769	0.460928
TraesCS2D03G0241000	P1010++C22++K00	0.601288	-0.262711	0.957019	-0.432405	-0.423966	-0.611172	-0.663641	-0.595144	-0.504661	-0.137802	-0.544859	0.0998873	-0.561113	-0.611112	-0.578083	-0.552465	0.0408402	-0.581259	-0.60445	-0.604652	-0.528442	-0.506213	-0.567216	-0.470554	-0.589546	-0.322941	-0.558703	-0.56571	0.212572	0.0953746	-0.465162	-0.427304	0.27224	0.4812	0.0858892	0.215763	0.329328	-0.654087	-0.38882	0.434741	0.402438	0.755204	0.619798	0.475714	0.686751	0.385828	0.623968	0.570478
TraesCS2D03G0605600	P1010++C22++K00	0.531528	-0.313622	0.927378	-0.262883	-0.335815	-0.464875	-0.487687	-0.413931	-0.28993	0.088579	-0.361076	0.608727	-0.410169	-0.501875	-0.470872	-0.418364	0.248069	-0.340694	-0.507199	-0.504656	-0.434165	-0.346431	-0.347102	-0.239779	-0.371019	-0.176325	-0.479673	-0.437159	0.117979	0.21584	-0.349607	-0.291183	0.1887	0.545702	0.257529	0.625163	0.743428	-0.508461	-0.2394	0.546491	0.738173	0.838068	0.727468	0.614363	0.592999	0.721858	0.743338	0.620395
TraesCS2D03G0725900	P1010++C22++K00	0.563985	-0.336845	0.988078	-0.357941	-0.395673	-0.542507	-0.594338	-0.516343	-0.438507	-0.0255224	-0.454631	0.23698	-0.486199	-0.557928	-0.53488	-0.520854	0.122708	-0.485417	-0.56157	-0.56956	-0.4974	-0.458654	-0.495819	-0.370038	-0.502087	-0.246397	-0.515674	-0.503272	0.13936	0.0657264	-0.421643	-0.406228	0.210497	0.469403	0.0546592	0.303177	0.421546	-0.597108	-0.314224	0.450847	0.510387	0.783053	0.662286	0.540792	0.673528	0.545332	0.67448	0.568307
TraesCS2D03G0955800	P1010++C22++K00	0.477	-0.223435	0.774227	-0.19969	-0.307528	-0.390302	-0.395377	-0.321202	-0.198872	0.0913105	-0.279536	0.715666	-0.347271	-0.43444	-0.402929	-0.329887	0.219605	-0.235303	-0.448953	-0.437586	-0.3788	-0.293885	-0.247644	-0.174416	-0.272417	-0.11885	-0.43159	-0.363039	0.0731731	0.253522	-0.296064	-0.265845	0.131959	0.535702	0.339911	0.711972	0.814276	-0.426327	-0.176339	0.579838	0.830133	0.788678	0.725543	0.637019	0.515837	0.720028	0.736205	0.610794
TraesCS2D03G1013200	P1010++C22++K00	0.609787	-0.255869	0.95999	-0.430514	-0.415935	-0.61427	-0.655906	-0.594264	-0.506725	-0.114232	-0.553163	0.134708	-0.557706	-0.612102	-0.580763	-0.554894	0.042437	-0.579413	-0.60493	-0.605818	-0.524842	-0.502214	-0.564231	-0.468649	-0.588115	-0.344451	-0.561921	-0.570501	0.244011	0.136668	-0.473578	-0.419696	0.308429	0.501469	0.122796	0.248268	0.366421	-0.647859	-0.4058	0.438881	0.411231	0.760385	0.615889	0.475961	0.683685	0.402943	0.624219	0.578675
TraesCS2D03G1100000	P1010++C22++K00	0.587258	-0.280343	0.95845	-0.3408	-0.454791	-0.530385	-0.571302	-0.478401	-0.417855	-0.047803	-0.42144	0.37557	-0.478578	-0.566444	-0.554283	-0.531683	0.0844605	-0.424919	-0.590275	-0.595917	-0.54134	-0.493319	-0.474818	-0.353002	-0.456222	-0.228871	-0.552985	-0.497527	0.121696	0.118972	-0.439436	-0.461633	0.188107	0.541229	0.122894	0.456109	0.589248	-0.594722	-0.299053	0.584294	0.722283	0.853431	0.781728	0.682941	0.689217	0.660149	0.792138	0.647556
TraesCS2D03G1305500	P1010++C22++K00	0.704513	-0.155972	0.969473	-0.474157	-0.523492	-0.665121	-0.694493	-0.619036	-0.516115	-0.13438	-0.56678	0.382385	-0.616082	-0.687806	-0.656742	-0.602976	0.0409138	-0.569353	-0.693858	-0.68857	-0.616722	-0.561526	-0.573789	-0.475425	-0.594538	-0.366439	-0.659351	-0.626865	0.267114	0.271851	-0.542727	-0.489175	0.330974	0.656824	0.293422	0.53073	0.639238	-0.707314	-0.434945	0.65554	0.711782	0.918044	0.818031	0.683826	0.764747	0.566886	0.822265	0.747525
TraesCS3A03G0079600	P1010++C22++K00	0.592522	-0.303299	0.987484	-0.367785	-0.435917	-0.556254	-0.60414	-0.517674	-0.44702	-0.040062	-0.454693	0.290316	-0.501723	-0.578011	-0.557409	-0.537367	0.094197	-0.479013	-0.590391	-0.596778	-0.528107	-0.491268	-0.502071	-0.378069	-0.501528	-0.247624	-0.545217	-0.514944	0.13224	0.0855432	-0.446253	-0.454464	0.203455	0.508074	0.089023	0.363483	0.481479	-0.614403	-0.318353	0.519104	0.60999	0.82671	0.730106	0.617229	0.705607	0.591091	0.740502	0.619486
TraesCS3A03G0331600	P1010++C22++K00	0.542215	-0.293271	0.919367	-0.395971	-0.365543	-0.566967	-0.621102	-0.560956	-0.476547	-0.124463	-0.518466	0.0191705	-0.515818	-0.559483	-0.527807	-0.51246	0.0479735	-0.558108	-0.547901	-0.550027	-0.474563	-0.46043	-0.538691	-0.447088	-0.560651	-0.302631	-0.502488	-0.523441	0.200653	0.052222	-0.418573	-0.375284	0.257473	0.411888	0.027655	0.119292	0.236792	-0.605201	-0.362979	0.342514	0.283253	0.672807	0.523055	0.380754	0.624279	0.319158	0.529001	0.487849
TraesCS3A03G1159700	P1010++C22++K00	0.601403	-0.251435	0.945876	-0.429488	-0.414514	-0.616554	-0.663145	-0.595849	-0.505699	-0.153045	-0.557305	0.0799787	-0.564717	-0.609848	-0.573761	-0.542071	0.0102546	-0.586971	-0.6033	-0.599691	-0.519075	-0.511076	-0.567597	-0.488022	-0.593979	-0.330421	-0.557736	-0.565179	0.219327	0.0994586	-0.464	-0.434116	0.277441	0.477377	0.101436	0.190542	0.311034	-0.651384	-0.394628	0.424571	0.385995	0.74078	0.603336	0.458809	0.678546	0.350079	0.606548	0.565207
TraesCS3B03G0035200	P1010++C22++K00	0.554719	-0.29621	0.936745	-0.290254	-0.359091	-0.492983	-0.517789	-0.44276	-0.31649	0.0563827	-0.389459	0.583102	-0.439878	-0.52813	-0.495129	-0.439659	0.225317	-0.37195	-0.532751	-0.528634	-0.457422	-0.373027	-0.375709	-0.271782	-0.401521	-0.197574	-0.504131	-0.462938	0.133578	0.221837	-0.372133	-0.313992	0.202504	0.56087	0.265103	0.615231	0.732907	-0.536899	-0.262368	0.562002	0.736817	0.852017	0.741572	0.622524	0.615348	0.700084	0.755071	0.638793
TraesCS3B03G0309700	P1010++C22++K00	0.578491	-0.225081	0.893065	-0.45011	-0.419263	-0.60595	-0.660285	-0.601274	-0.53268	-0.181239	-0.556022	-0.044915	-0.558846	-0.596156	-0.568137	-0.556203	-0.019184	-0.604783	-0.587026	-0.590211	-0.518457	-0.514008	-0.589114	-0.497124	-0.60654	-0.349901	-0.540498	-0.56175	0.236316	0.0664297	-0.469357	-0.433465	0.290661	0.433067	0.0344366	0.094107	0.197023	-0.644199	-0.409729	0.372442	0.278778	0.676019	0.542447	0.404271	0.663219	0.27323	0.545076	0.515196
TraesCS3D03G0118500	P1010++C22++K00	0.604412	-0.298831	0.996746	-0.377602	-0.419367	-0.571891	-0.613844	-0.536725	-0.440627	-0.0277764	-0.477895	0.340917	-0.515668	-0.591363	-0.563025	-0.5314	0.130914	-0.494323	-0.594473	-0.597244	-0.521545	-0.470478	-0.498777	-0.381224	-0.514924	-0.269866	-0.553022	-0.532891	0.171311	0.143773	-0.446365	-0.410971	0.24296	0.535921	0.151461	0.416551	0.533724	-0.620879	-0.338224	0.519793	0.600261	0.839538	0.719342	0.592087	0.69557	0.587727	0.730751	0.630405
TraesCS3D03G0884400	P1010++C22++K00	0.686904	-0.192283	0.985452	-0.487433	-0.495044	-0.668317	-0.702545	-0.640827	-0.547173	-0.129285	-0.591859	0.260488	-0.612816	-0.680615	-0.653311	-0.619704	0.047671	-0.607369	-0.677125	-0.678764	-0.603089	-0.551393	-0.603796	-0.492734	-0.623931	-0.400464	-0.640464	-0.635073	0.30773	0.247244	-0.542456	-0.457147	0.374868	0.614475	0.226735	0.419586	0.531614	-0.705683	-0.463276	0.5664	0.558673	0.863453	0.729512	0.588732	0.74707	0.49796	0.73854	0.68563
TraesCS3D03G0935000	P1010++C22++K00	0.533097	-0.252541	0.868108	-0.421699	-0.375715	-0.569795	-0.62985	-0.574296	-0.499707	-0.161541	-0.525612	-0.0779147	-0.525348	-0.557385	-0.52696	-0.518573	0.0114725	-0.581937	-0.54299	-0.546812	-0.475611	-0.469595	-0.557522	-0.465711	-0.579915	-0.317775	-0.495548	-0.526551	0.208588	0.0278078	-0.427392	-0.386491	0.260506	0.380959	-0.00619665	0.0437349	0.140103	-0.608802	-0.376363	0.311441	0.207789	0.625171	0.48405	0.34345	0.620911	0.239269	0.486418	0.460229
TraesCS4B03G0673800	P1010++C22++K00	0.552967	-0.357567	0.996078	-0.318357	-0.361817	-0.514227	-0.55463	-0.480174	-0.38734	0.0477731	-0.421489	0.37792	-0.452686	-0.53531	-0.510152	-0.487209	0.188252	-0.435388	-0.538065	-0.544971	-0.467897	-0.411605	-0.442354	-0.315004	-0.456033	-0.222857	-0.496936	-0.478671	0.134541	0.115531	-0.395299	-0.35828	0.211759	0.493362	0.117083	0.414397	0.535384	-0.56275	-0.288268	0.469105	0.579736	0.807203	0.678624	0.560595	0.650211	0.629546	0.695876	0.581813
TraesCS4B03G0768300	P1010++C22++K00	0.557474	-0.219261	0.862976	-0.29079	-0.421243	-0.459414	-0.479537	-0.396809	-0.329589	0.0835087	-0.325867	0.612339	-0.409707	-0.50768	-0.496687	-0.46331	0.167539	-0.320045	-0.532933	-0.540412	-0.484779	-0.40851	-0.363512	-0.229746	-0.358466	-0.183642	-0.502759	-0.434711	0.0994221	0.204563	-0.406273	-0.40663	0.175329	0.565017	0.238172	0.655156	0.737566	-0.514635	-0.246661	0.629122	0.853208	0.854087	0.811384	0.741401	0.65408	0.780703	0.827114	0.670338
TraesCS4B03G0923500	P1010++C22++K00	0.628093	-0.211151	0.936411	-0.475138	-0.447449	-0.645142	-0.691373	-0.633356	-0.547989	-0.179285	-0.591399	0.0542944	-0.594418	-0.64042	-0.609405	-0.585241	-0.000336576	-0.625312	-0.630364	-0.630702	-0.55494	-0.534018	-0.607876	-0.515761	-0.631017	-0.384133	-0.588041	-0.603778	0.280589	0.145633	-0.502438	-0.438187	0.338039	0.508308	0.118628	0.207147	0.31897	-0.679794	-0.444901	0.441387	0.364471	0.748218	0.604688	0.457544	0.695385	0.333733	0.60885	0.581211
TraesCS4B03G0970200	P1010++C22++K00	0.559856	-0.323233	0.969699	-0.302638	-0.356243	-0.509698	-0.539567	-0.46533	-0.339176	0.0453805	-0.413327	0.523261	-0.453605	-0.539351	-0.505267	-0.455047	0.221167	-0.402203	-0.540633	-0.537691	-0.462578	-0.384298	-0.40166	-0.295517	-0.428277	-0.21111	-0.508848	-0.477368	0.142906	0.198858	-0.37867	-0.317089	0.213081	0.547953	0.231526	0.558145	0.683474	-0.553555	-0.276738	0.53301	0.682051	0.84628	0.720446	0.593383	0.6247	0.671136	0.734526	0.624737
TraesCS4B03G0972000	P1010++C22++K00	0.578122	-0.331316	0.998874	-0.34468	-0.373455	-0.549274	-0.588018	-0.515486	-0.39832	-0.00252577	-0.464266	0.385391	-0.491508	-0.568367	-0.534204	-0.494287	0.177958	-0.468974	-0.565585	-0.564781	-0.486033	-0.424474	-0.462983	-0.355107	-0.488625	-0.250168	-0.527998	-0.512418	0.168705	0.160462	-0.40798	-0.348441	0.238487	0.527846	0.174012	0.44187	0.570702	-0.59316	-0.316689	0.493259	0.582556	0.827692	0.687461	0.550597	0.651877	0.59152	0.700203	0.606916
TraesCS4D03G0674800	P1010++C22++K00	0.607708	-0.290713	0.992434	-0.372863	-0.426311	-0.575433	-0.613509	-0.535379	-0.436057	-0.0652565	-0.489511	0.354119	-0.520092	-0.598934	-0.571956	-0.534791	0.113592	-0.488473	-0.604675	-0.603852	-0.53482	-0.479166	-0.502572	-0.397591	-0.511735	-0.279375	-0.569342	-0.540896	0.190374	0.173848	-0.445249	-0.403996	0.255092	0.560004	0.177557	0.445129	0.585812	-0.624337	-0.346843	0.545072	0.626706	0.851442	0.72938	0.598012	0.67825	0.586981	0.739562	0.640654
TraesCS5A03G0568100	P1010++C22++K00	0.510848	-0.283702	0.873578	-0.238616	-0.320234	-0.434657	-0.449383	-0.379299	-0.251327	0.102734	-0.330066	0.673337	-0.383291	-0.476536	-0.445994	-0.386575	0.259551	-0.298135	-0.48303	-0.478272	-0.412612	-0.31569	-0.305878	-0.206242	-0.331173	-0.160643	-0.461509	-0.411793	0.115462	0.251019	-0.328137	-0.261607	0.182706	0.551817	0.301661	0.685458	0.798001	-0.474716	-0.220163	0.560437	0.774002	0.824802	0.724456	0.618613	0.557631	0.736865	0.740133	0.617878
TraesCS5A03G1040500	P1010++C22++K00	0.619218	-0.264647	0.979659	-0.379378	-0.429177	-0.578159	-0.614597	-0.537005	-0.416339	-0.0384293	-0.478888	0.443339	-0.527518	-0.605173	-0.570581	-0.519535	0.15257	-0.480662	-0.60707	-0.603186	-0.530174	-0.460379	-0.48009	-0.37433	-0.505371	-0.268399	-0.571998	-0.542349	0.182169	0.207432	-0.444972	-0.389907	0.248351	0.583566	0.235727	0.526678	0.642493	-0.626079	-0.337921	0.577546	0.681094	0.876941	0.761323	0.626193	0.689036	0.618829	0.769579	0.67184
TraesCS5A03G1142000	P1010++C22++K00	0.457137	-0.285922	0.813779	-0.362098	-0.315649	-0.507048	-0.568471	-0.514629	-0.457103	-0.167851	-0.481131	-0.174776	-0.462898	-0.488962	-0.463084	-0.465422	-0.0112314	-0.533552	-0.476614	-0.480807	-0.416228	-0.42867	-0.516823	-0.439798	-0.528158	-0.275625	-0.430411	-0.463929	0.17024	-0.0410407	-0.365987	-0.348831	0.214883	0.296818	-0.0850693	-0.0746136	0.0395511	-0.544369	-0.329365	0.22201	0.106164	0.530643	0.389063	0.257563	0.542582	0.168598	0.391601	0.367055
TraesCS5B03G0492200	P1010++C22++K00	0.680133	-0.193119	0.978469	-0.459998	-0.515409	-0.644106	-0.684141	-0.603182	-0.515825	-0.12054	-0.541294	0.319149	-0.595262	-0.665984	-0.639255	-0.599926	0.0424916	-0.560072	-0.674611	-0.674521	-0.604758	-0.558659	-0.571574	-0.459687	-0.583643	-0.33718	-0.634068	-0.60371	0.224027	0.197472	-0.52816	-0.501626	0.290242	0.607839	0.20976	0.454013	0.558159	-0.695059	-0.408137	0.61626	0.671148	0.8919	0.798618	0.671241	0.766579	0.561964	0.803383	0.712885
TraesCS5B03G0598900	P1010++C22++K00	0.592031	-0.300125	0.983743	-0.403774	-0.405503	-0.586825	-0.63713	-0.569115	-0.469774	-0.0732562	-0.512714	0.204899	-0.533057	-0.595678	-0.564386	-0.539658	0.111778	-0.542566	-0.588778	-0.5919	-0.515492	-0.471208	-0.532482	-0.419747	-0.554518	-0.298769	-0.545589	-0.548392	0.201064	0.117598	-0.446065	-0.389387	0.266881	0.496911	0.104409	0.301895	0.417326	-0.632857	-0.364683	0.449689	0.457964	0.78425	0.64201	0.500221	0.67753	0.475851	0.651141	0.579913
TraesCS5B03G0715800	P1010++C22++K00	0.584065	-0.217692	0.892112	-0.457615	-0.417757	-0.614498	-0.666106	-0.611344	-0.537429	-0.189864	-0.570718	-0.0431682	-0.566697	-0.603693	-0.5746	-0.560287	-0.018543	-0.614828	-0.591867	-0.593974	-0.521619	-0.513342	-0.595605	-0.507295	-0.615789	-0.366646	-0.54768	-0.572505	0.260134	0.0909176	-0.473788	-0.42124	0.313236	0.44493	0.0545278	0.104519	0.211338	-0.649149	-0.424702	0.372759	0.267512	0.676782	0.534383	0.391432	0.657456	0.26159	0.537325	0.517237
TraesCS5B03G1345500	P1010++C22++K00	0.645478	-0.23874	0.984073	-0.447389	-0.46748	-0.633067	-0.680388	-0.604835	-0.509517	-0.122381	-0.547075	0.221066	-0.582912	-0.643531	-0.611156	-0.576216	0.0540768	-0.575499	-0.642994	-0.642381	-0.566577	-0.530697	-0.570119	-0.46528	-0.591177	-0.327991	-0.598859	-0.588623	0.215695	0.146238	-0.4964	-0.461247	0.279898	0.548	0.151754	0.341668	0.450759	-0.680052	-0.397718	0.526397	0.540521	0.833678	0.714661	0.574857	0.732698	0.481644	0.719187	0.646955
TraesCS5D03G0047300	P1010++C22++K00	0.592675	-0.221102	0.905464	-0.452115	-0.430282	-0.618866	-0.66964	-0.607445	-0.538781	-0.201191	-0.570523	-0.0340706	-0.570311	-0.609328	-0.580957	-0.563868	-0.0400126	-0.609439	-0.603263	-0.603681	-0.531912	-0.531839	-0.598447	-0.515649	-0.613114	-0.358122	-0.558185	-0.572683	0.244026	0.0803472	-0.4783	-0.449464	0.296822	0.453136	0.0538782	0.108566	0.225741	-0.65563	-0.418692	0.395944	0.309111	0.695227	0.56265	0.423056	0.670152	0.279029	0.564597	0.534105
TraesCS5D03G0104900	P1010++C22++K00	0.577543	-0.330261	0.997151	-0.341678	-0.375776	-0.54745	-0.586989	-0.512221	-0.392579	-0.00696393	-0.460291	0.395889	-0.491228	-0.568242	-0.53336	-0.490922	0.178933	-0.463665	-0.566385	-0.564505	-0.487157	-0.424272	-0.458895	-0.352954	-0.484265	-0.243094	-0.52916	-0.510341	0.160948	0.159374	-0.404869	-0.349204	0.229283	0.530236	0.177493	0.451636	0.581399	-0.593077	-0.310723	0.501927	0.597668	0.832863	0.696254	0.558795	0.651111	0.597037	0.707961	0.611444
TraesCS5D03G0455000	P1010++C22++K00	0.612031	-0.290257	0.996969	-0.388048	-0.429968	-0.583714	-0.625549	-0.548618	-0.454429	-0.0570782	-0.495193	0.315362	-0.527906	-0.602719	-0.575361	-0.543728	0.109649	-0.507973	-0.606384	-0.60819	-0.535009	-0.485895	-0.515826	-0.403149	-0.528421	-0.285475	-0.566409	-0.545822	0.187679	0.151091	-0.455709	-0.418575	0.25613	0.544056	0.152672	0.405013	0.531197	-0.632554	-0.353446	0.525408	0.592123	0.840703	0.71855	0.588332	0.696232	0.568383	0.728952	0.633441
TraesCS5D03G0534100	P1010++C22++K00	0.629837	-0.171717	0.89899	-0.378707	-0.461921	-0.562719	-0.587912	-0.507213	-0.392727	-0.0308144	-0.441955	0.554804	-0.520303	-0.599196	-0.566606	-0.503115	0.130194	-0.437266	-0.609928	-0.603396	-0.537075	-0.46265	-0.444003	-0.343327	-0.469319	-0.255218	-0.57899	-0.527454	0.167396	0.25787	-0.456898	-0.421347	0.231941	0.620932	0.31646	0.641659	0.727075	-0.609957	-0.323946	0.658832	0.81084	0.896456	0.826218	0.711962	0.698189	0.666568	0.831265	0.722988
TraesCS5D03G1127500	P1010++C22++K00	0.610264	-0.269434	0.974106	-0.421242	-0.428665	-0.608193	-0.657601	-0.584026	-0.491613	-0.111211	-0.531227	0.166964	-0.556374	-0.612012	-0.57847	-0.548126	0.0557336	-0.563026	-0.6091	-0.60871	-0.530219	-0.505655	-0.552349	-0.453319	-0.574946	-0.307334	-0.56286	-0.560435	0.194676	0.103513	-0.465494	-0.438221	0.258304	0.499135	0.107885	0.268044	0.38146	-0.652246	-0.375362	0.465841	0.468894	0.78615	0.658583	0.519056	0.700938	0.440689	0.663782	0.596691
TraesCS6B03G0007800	P1010++C22++K00	0.660056	-0.209985	0.972152	-0.462778	-0.481217	-0.646949	-0.698865	-0.618466	-0.49671	-0.135559	-0.548034	0.272752	-0.606151	-0.660166	-0.616881	-0.563602	0.0732328	-0.582021	-0.656011	-0.649109	-0.571766	-0.526738	-0.561018	-0.46411	-0.598523	-0.312607	-0.610832	-0.597773	0.195579	0.158392	-0.496524	-0.459909	0.25542	0.56561	0.195836	0.392994	0.481423	-0.697143	-0.387838	0.561703	0.586508	0.859385	0.750714	0.599803	0.74783	0.481849	0.748908	0.678907
TraesCS6B03G0405500	P1010++C22++K00	0.513132	-0.189519	0.782033	-0.246921	-0.377501	-0.423475	-0.435173	-0.355917	-0.260405	0.0324136	-0.308108	0.650874	-0.383155	-0.474004	-0.454389	-0.396314	0.162935	-0.271857	-0.496429	-0.490803	-0.444359	-0.360192	-0.308822	-0.218986	-0.311495	-0.157903	-0.478628	-0.402558	0.0993953	0.249126	-0.34901	-0.332917	0.156097	0.562372	0.305927	0.694342	0.798892	-0.471231	-0.217234	0.625925	0.853538	0.814901	0.770042	0.688543	0.562681	0.722386	0.779398	0.64241
TraesCS6D03G0102300	P1010++C22++K00	0.602441	-0.178447	0.874086	-0.342846	-0.436032	-0.526281	-0.543705	-0.467494	-0.35688	-0.0021671	-0.410364	0.605564	-0.481542	-0.567869	-0.540356	-0.47923	0.151475	-0.391149	-0.580674	-0.575359	-0.514021	-0.429947	-0.407115	-0.306361	-0.425795	-0.241179	-0.555884	-0.49898	0.169957	0.282665	-0.431061	-0.383998	0.23412	0.620372	0.332382	0.684328	0.779637	-0.570945	-0.305148	0.65507	0.82853	0.882337	0.810931	0.705234	0.657295	0.698795	0.819605	0.706122
TraesCS6D03G0135100	P1010++C22++K00	0.600452	-0.177669	0.871012	-0.343808	-0.454513	-0.527542	-0.551474	-0.466063	-0.367003	-0.0401499	-0.408456	0.551956	-0.486404	-0.569667	-0.544396	-0.486051	0.111832	-0.393445	-0.588461	-0.582533	-0.526706	-0.455418	-0.420216	-0.323725	-0.42903	-0.228412	-0.561026	-0.496219	0.142695	0.238592	-0.433383	-0.420493	0.202448	0.604257	0.291468	0.635191	0.736769	-0.579505	-0.295941	0.660146	0.832374	0.877718	0.822224	0.71971	0.666781	0.678932	0.827335	0.703408
TraesCS6D03G0269100	P1010++C22++K00	0.401895	-0.216345	0.680413	-0.133667	-0.279082	-0.29633	-0.298953	-0.226393	-0.137958	0.134162	-0.181774	0.734806	-0.257191	-0.353125	-0.339062	-0.286295	0.23008	-0.134118	-0.377983	-0.374942	-0.335993	-0.242603	-0.177034	-0.0881563	-0.175953	-0.0637036	-0.366655	-0.283875	0.0286076	0.225353	-0.245303	-0.234253	0.0848018	0.485415	0.28828	0.72074	0.815756	-0.340691	-0.11461	0.557581	0.843839	0.724244	0.692583	0.637102	0.44746	0.759944	0.706947	0.553443
TraesCS6D03G0269200	P1010++C22++K00	0.412843	-0.212912	0.689621	-0.144413	-0.291886	-0.305697	-0.309037	-0.235742	-0.151705	0.132666	-0.188669	0.729803	-0.265828	-0.362845	-0.350359	-0.300266	0.224135	-0.143926	-0.388702	-0.387106	-0.348001	-0.255299	-0.189246	-0.0953399	-0.186051	-0.0722565	-0.376306	-0.293233	0.0336575	0.225414	-0.258248	-0.249276	0.0916035	0.492426	0.284666	0.720896	0.813832	-0.351316	-0.123708	0.566444	0.85087	0.733906	0.70424	0.650203	0.462908	0.767101	0.719019	0.563298
TraesCS7A03G0272100	P1010++C22++K00	0.56335	-0.320669	0.97117	-0.306593	-0.360248	-0.51216	-0.541433	-0.468034	-0.345101	0.0470445	-0.415768	0.521106	-0.455238	-0.541895	-0.509225	-0.461163	0.218751	-0.405255	-0.543517	-0.541649	-0.466621	-0.388218	-0.406223	-0.297272	-0.431376	-0.217059	-0.511718	-0.480668	0.148835	0.202199	-0.384269	-0.321237	0.220066	0.550999	0.230872	0.558933	0.683479	-0.555823	-0.282149	0.534845	0.682033	0.847843	0.722032	0.596537	0.628934	0.674233	0.736823	0.626971
TraesCS7B03G0031800	P1010++C22++K00	0.536862	-0.305449	0.925364	-0.268899	-0.34281	-0.469711	-0.492538	-0.418461	-0.294742	0.08292	-0.36474	0.608787	-0.415747	-0.507016	-0.475995	-0.422788	0.242925	-0.344981	-0.512657	-0.509925	-0.439839	-0.352102	-0.351572	-0.24432	-0.375536	-0.180358	-0.485112	-0.441872	0.120816	0.219541	-0.355287	-0.297473	0.191209	0.550734	0.262102	0.629178	0.745437	-0.513591	-0.243711	0.553829	0.744231	0.84202	0.733809	0.620754	0.598449	0.720799	0.749135	0.62668
TraesCS7B03G0110500	P1010++C22++K00	0.451449	-0.263417	0.784705	-0.368478	-0.311713	-0.503083	-0.561772	-0.513802	-0.46343	-0.164594	-0.480409	-0.199657	-0.459032	-0.481563	-0.457267	-0.46346	-0.0235883	-0.537192	-0.467675	-0.473496	-0.408279	-0.424678	-0.516858	-0.439045	-0.529767	-0.287416	-0.421477	-0.46071	0.18327	-0.0364414	-0.369767	-0.347642	0.228683	0.286047	-0.0855836	-0.0950191	0.00749488	-0.535991	-0.337784	0.204548	0.0735636	0.504962	0.364965	0.238587	0.536291	0.141536	0.368149	0.353435
TraesCS7D03G0003200	P1010++C22++K00	0.49531	-0.336645	0.90858	-0.344867	-0.358696	-0.521831	-0.583955	-0.50966	-0.451195	-0.167483	-0.478539	-0.0516632	-0.47312	-0.521143	-0.500368	-0.497399	0.0062545	-0.508518	-0.522844	-0.525917	-0.46788	-0.466929	-0.523893	-0.43907	-0.514977	-0.253555	-0.479071	-0.480868	0.144026	-0.0266195	-0.380352	-0.389342	0.190949	0.365579	-0.0649991	0.0439125	0.199962	-0.574229	-0.316147	0.326349	0.284183	0.642402	0.511295	0.380068	0.584468	0.315026	0.51539	0.444291
TraesCS7D03G0250300	P1010++C22++K00	0.420085	-0.24766	0.732733	-0.148403	-0.256516	-0.322829	-0.324923	-0.260096	-0.141035	0.165638	-0.213697	0.771915	-0.278837	-0.374004	-0.349153	-0.287262	0.288535	-0.167251	-0.38638	-0.381174	-0.328305	-0.222452	-0.184189	-0.0939879	-0.205004	-0.0826498	-0.373959	-0.308634	0.0581182	0.258815	-0.247161	-0.192034	0.119722	0.503637	0.326131	0.748659	0.841654	-0.359443	-0.133907	0.539715	0.81182	0.746841	0.67992	0.603701	0.455867	0.763256	0.696512	0.561694
TraesCS7D03G1105900	P1010++C22++K00	0.621002	-0.263119	0.980191	-0.431117	-0.439272	-0.618225	-0.667674	-0.59471	-0.497308	-0.122098	-0.541817	0.18154	-0.567292	-0.624752	-0.591153	-0.55881	0.060395	-0.570536	-0.621086	-0.620177	-0.543692	-0.511439	-0.561009	-0.460973	-0.583302	-0.318208	-0.57684	-0.573605	0.209586	0.123918	-0.473689	-0.435	0.27176	0.517883	0.12425	0.293987	0.410412	-0.663476	-0.386521	0.483295	0.48341	0.801804	0.671457	0.527757	0.705184	0.448744	0.676309	0.610393
TraesCSU03G0238600	P1010++C22++K00	0.563155	-0.190598	0.840873	-0.462014	-0.397684	-0.604368	-0.65046	-0.609937	-0.544482	-0.206105	-0.580131	-0.108766	-0.555989	-0.587661	-0.562269	-0.555505	-0.0397683	-0.622077	-0.570865	-0.574689	-0.505111	-0.498755	-0.599128	-0.516083	-0.618505	-0.397396	-0.531103	-0.56913	0.30492	0.11216	-0.469537	-0.390368	0.354354	0.42559	0.0521249	0.0575643	0.163326	-0.629846	-0.447112	0.326213	0.176951	0.619071	0.464754	0.323634	0.618138	0.191468	0.469273	0.474641
TraesCS1B03G0711800	P0202++C22++K00	-0.449222	-0.786579	0.267862	0.513938	0.438608	0.419783	0.325616	0.389736	0.486375	0.313759	0.418229	0.0970784	0.420449	0.380507	0.395071	0.365964	0.552784	0.42138	0.386846	0.383047	0.360226	0.429771	0.389739	0.42824	0.419238	0.587876	0.398072	0.409629	-0.560463	-0.559027	0.539285	0.457964	-0.573087	-0.426406	-0.558653	-0.218689	-0.0585459	0.332174	0.554035	-0.401487	-0.167977	-0.135131	-0.229831	-0.280056	-0.366062	0.272628	-0.220956	-0.414516
TraesCS2D03G0983200	P0202++C22++K00	-0.66082	-0.788331	0.0252817	0.655883	0.568745	0.686746	0.586496	0.626956	0.641241	0.662493	0.734616	0.165094	0.681756	0.633245	0.613845	0.51057	0.731495	0.660117	0.636324	0.592356	0.556358	0.650363	0.616665	0.766712	0.660563	0.763657	0.658044	0.652561	-0.73486	-0.713658	0.670178	0.565183	-0.715712	-0.654801	-0.756023	-0.253885	-0.253552	0.585347	0.747253	-0.587327	-0.268461	-0.360573	-0.380578	-0.329857	-0.473439	0.400792	-0.352896	-0.609487
TraesCS3B03G1158700	P0202++C22++K00	-0.75433	-0.700189	-0.170837	0.82709	0.616021	0.818941	0.798561	0.845673	0.641845	0.660735	0.828733	-0.0553375	0.857426	0.800259	0.724751	0.574323	0.288545	0.831652	0.734464	0.683753	0.646041	0.554089	0.679961	0.749466	0.820747	0.765292	0.753357	0.817049	-0.77158	-0.812398	0.678257	0.319027	-0.739102	-0.772164	-0.851707	-0.55614	-0.459146	0.771107	0.781899	-0.657656	-0.246803	-0.569614	-0.487293	-0.290025	-0.562551	0.319774	-0.441544	-0.720041
TraesCS5B03G0835100	P0202++C22++K00	-0.918448	-0.791915	-0.268618	0.913963	0.936696	0.893309	0.853182	0.860061	0.904717	0.767635	0.865447	0.0827504	0.89993	0.910016	0.933097	0.889233	0.656754	0.847276	0.931096	0.923206	0.937324	0.910488	0.902159	0.879528	0.869413	0.914022	0.948938	0.913331	-0.848477	-0.785584	0.939281	0.777666	-0.842629	-0.925708	-0.676306	-0.547805	-0.534999	0.884419	0.927311	-0.945136	-0.613235	-0.740866	-0.794125	-0.726317	-0.806104	0.0342349	-0.768803	-0.907715
TraesCS7A03G0020800	P0202++C22++K00	-0.414057	-0.605152	0.127041	0.559387	0.268517	0.490663	0.451864	0.539009	0.400212	0.333759	0.527737	0.107428	0.517022	0.430394	0.361832	0.259773	0.202927	0.571266	0.352964	0.319483	0.258873	0.237475	0.374942	0.44781	0.537817	0.549001	0.359233	0.474242	-0.570384	-0.561875	0.407977	0.105544	-0.558374	-0.369264	-0.615696	-0.183551	0.00261437	0.401649	0.533776	-0.200668	0.188524	-0.122791	-0.0458395	0.0696425	-0.274864	0.49635	-0.0178894	-0.319887
TraesCS7A03G0523600	P0202++C22++K00	-0.552004	-0.866591	0.229192	0.68051	0.541283	0.638646	0.573836	0.634833	0.599874	0.877872	0.734771	0.39517	0.677515	0.59776	0.573321	0.468684	0.714069	0.671981	0.575624	0.524021	0.538315	0.573079	0.61632	0.789659	0.660601	0.766086	0.617889	0.643157	-0.782626	-0.713622	0.587937	0.381236	-0.708639	-0.574734	-0.693459	-0.141699	-0.134207	0.559573	0.74468	-0.48765	-0.00322583	-0.1994	-0.201409	-0.101582	-0.298462	0.676312	-0.153469	-0.466219
TraesCS7D03G0081000	P0202++C22++K00	-0.191408	-0.673699	0.45268	0.195074	0.27702	0.119229	-0.0135089	0.0381202	0.287464	0.235262	0.155384	0.154862	0.0970328	0.0934334	0.168363	0.199036	0.692562	0.0738496	0.156603	0.16608	0.189055	0.326908	0.175827	0.245768	0.0896175	0.407718	0.188049	0.126236	-0.405774	-0.403358	0.341762	0.427699	-0.410225	-0.236797	-0.347283	-0.058355	-0.028159	0.0293233	0.348238	-0.271635	-0.190317	0.0909427	-0.0722894	-0.237601	-0.0975459	0.194083	-0.0826677	-0.185224
TraesCS5A03G0609000	P2020++C11++K00	-0.613507	0.021767	-0.730184	0.394171	0.560243	0.473744	0.475859	0.406976	0.500895	-0.127874	0.310828	-0.420781	0.41281	0.513691	0.552957	0.595451	0.046752	0.360528	0.567374	0.610083	0.561574	0.545699	0.457508	0.249742	0.399621	0.300009	0.523299	0.45188	-0.162857	-0.17295	0.568815	0.653855	-0.270152	-0.546614	-0.134106	-0.522434	-0.508191	0.523534	0.346146	-0.653195	-0.840412	-0.783822	-0.836903	-0.869499	-0.792012	-0.77819	-0.865617	-0.693489
TraesCS5D03G0251400	P2020++C11++K00	-0.735789	-0.167793	-0.681824	0.519268	0.638657	0.670845	0.648927	0.573032	0.632813	0.266327	0.570487	-0.136837	0.619056	0.664592	0.667342	0.633132	0.408836	0.5654	0.717048	0.713534	0.64889	0.73604	0.622282	0.582519	0.595253	0.460655	0.678541	0.602051	-0.299362	-0.2574	0.66452	0.801578	-0.36311	-0.629617	-0.311696	-0.323016	-0.391771	0.675831	0.508564	-0.711531	-0.752956	-0.775092	-0.817336	-0.793178	-0.816255	-0.371307	-0.816892	-0.767619
Positive	P0101++C11++K00	2	58	0	0	0	0	0	0	0	0	0	0	0	0	0	0	0	0	0	0	0	0	0	0	0	0	0	0	53	49	0	0	51	4	2	0	0	0	0	2	0	0	0	0	0	0	0	0
Negative	P0101++C11++K00	0	0	0	25	13	2	0	2	11	12	4	0	4	1	5	1	13	4	2	2	3	2	5	5	5	57	5	6	0	0	15	1	0	0	0	0	0	0	50	0	0	0	0	0	0	0	0	0
Positive	P1010++C22++K00	0	0	62	0	0	0	0	0	0	0	0	4	0	0	0	0	0	0	0	0	0	0	0	0	0	0	0	0	0	0	0	0	0	0	0	4	17	0	0	0	23	53	35	3	9	14	38	4
Negative	P1010++C22++K00	0	0	0	0	0	0	1	0	0	0	0	0	0	0	0	0	0	0	0	0	0	0	0	0	0	0	0	0	0	0	0	0	0	0	0	0	0	2	0	0	0	0	0	0	0	0	0	0
[truncated: 103 more columns]

## Sheet: GO_P0101∩C11∩K00 
Gene Count:	49
Background Gene Count:	75477
Ontology:	E:\GOAnalyzer\Deployment\Data\gofiles\go-basic.obo
Annotation:	E:\GOAnalyzer\Deployment\data\gofiles\Gene-GO_association.wheat2022
Hierarchy:	All
Correction:	BH FDR p-value adjustment
Max Path Length From Leaf:	N/A
Min Path Length From Root:	3
GO ID	Description	P-Value	Corrected P-Value	Total Genes	Matched Gene Counts	Matched Genes
GO:0010876	lipid localization	0.02	0.02	300	2 (0.67%)	TraesCS1A03G0908000;TraesCS1B03G1066700	0
GO:0006869	lipid transport	0.02	0.02	291	2 (0.69%)	TraesCS1A03G0908000;TraesCS1B03G1066700	0
GO:0051513	regulation of monopolar cell growth	1.482e-05	1.559e-05	9	2 (22.22%)	TraesCS2B03G0488200;TraesCS2A03G0367000	0
GO:0051510	regulation of unidimensional cell growth	2.714e-05	2.854e-05	12	2 (16.67%)	TraesCS2B03G0488200;TraesCS2A03G0367000	0
GO:0001558	regulation of cell growth	0.0001434	0.0001508	27	2 (7.41%)	TraesCS2B03G0488200;TraesCS2A03G0367000	0
GO:0022604	regulation of cell morphogenesis	0.0001544	0.0001623	28	2 (7.14%)	TraesCS2B03G0488200;TraesCS2A03G0367000	0
GO:0022603	regulation of anatomical structure morphogenesis	0.0005782	0.0006071	54	2 (3.7%)	TraesCS2B03G0488200;TraesCS2A03G0367000	0
GO:0048638	regulation of developmental growth	0.001701	0.001785	93	2 (2.15%)	TraesCS2B03G0488200;TraesCS2A03G0367000	0
GO:0040008	regulation of growth	0.005596	0.005863	171	2 (1.17%)	TraesCS2B03G0488200;TraesCS2A03G0367000	0
GO:0051128	regulation of cellular component organization	0.008238	0.008623	209	2 (0.96%)	TraesCS2B03G0488200;TraesCS2A03G0367000	0
GO:0050793	regulation of developmental process	0.001725	0.00181	363	3 (0.83%)	TraesCS2B03G0488200;TraesCS2A03G0367000;TraesCS3B03G1352700	1
GO:0016491	oxidoreductase activity	0.02	0.03	6583	9 (0.14%)	TraesCS2D03G0389100;TraesCS5A03G0796200;TraesCS5A03G1113800;TraesCS7D03G0446000;TraesCS5D03G0752600;TraesCS5B03G0828500;TraesCS5A03G0796300;TraesCS5B03G0828400;TraesCS2D03G1214900	1
GO:0010496	intercellular transport	0.009695	0.01	15	1 (6.67%)	TraesCS3B03G1352700	0
GO:0010497	plasmodesmata-mediated intercellular transport	0.009695	0.01	15	1 (6.67%)	TraesCS3B03G1352700	0
GO:2000280	regulation of root development	0.01	0.01	17	1 (5.88%)	TraesCS3B03G1352700	0
GO:0008422	beta-glucosidase activity	0.02	0.02	36	1 (2.78%)	TraesCS3D03G0865700	0
GO:0051275	beta-glucan catabolic process	0.04	0.04	55	1 (1.82%)	TraesCS3D03G0865700	0
GO:0030245	cellulose catabolic process	0.04	0.04	55	1 (1.82%)	TraesCS3D03G0865700	0
GO:0009251	glucan catabolic process	0.05	0.05	75	1 (1.33%)	TraesCS3D03G0865700	0
GO:0044247	cellular polysaccharide catabolic process	0.05	0.05	73	1 (1.37%)	TraesCS3D03G0865700	0
GO:0015926	glucosidase activity	0.05	0.05	71	1 (1.41%)	TraesCS3D03G0865700	0
GO:0046914	transition metal ion binding	0.001756	0.001841	4352	9 (0.21%)	TraesCS5A03G0796200;TraesCS5A03G1113800;TraesCS2A03G0862400;TraesCS5D03G0752600;TraesCS3B03G1352700;TraesCS5B03G0828500;TraesCS5A03G0796300;TraesCS5B03G0828400;TraesCS2D03G1214900	0
GO:0005506	iron ion binding	0.0001573	0.0001653	1804	7 (0.39%)	TraesCS5A03G0796200;TraesCS5A03G1113800;TraesCS5D03G0752600;TraesCS5B03G0828500;TraesCS5A03G0796300;TraesCS5B03G0828400;TraesCS2D03G1214900	0
GO:0016705	oxidoreductase activity, acting on paired donors, with incorporation or reduction of molecular oxygen	0.0001799	0.0001889	1844	7 (0.38%)	TraesCS5A03G0796200;TraesCS5A03G1113800;TraesCS5D03G0752600;TraesCS5B03G0828500;TraesCS5A03G0796300;TraesCS5B03G0828400;TraesCS2D03G1214900	0
GO:0020037	heme binding	0.0009726	0.001021	2447	7 (0.29%)	TraesCS5A03G0796200;TraesCS5A03G1113800;TraesCS5D03G0752600;TraesCS5B03G0828500;TraesCS5A03G0796300;TraesCS5B03G0828400;TraesCS2D03G1214900	0
GO:0046906	tetrapyrrole binding	0.001182	0.001241	2531	7 (0.28%)	TraesCS5A03G0796200;TraesCS5A03G1113800;TraesCS5D03G0752600;TraesCS5B03G0828500;TraesCS5A03G0796300;TraesCS5B03G0828400;TraesCS2D03G1214900	0
GO:0004462	lactoylglutathione lyase activity	0.01	0.01	18	1 (5.56%)	TraesCS5A03G1073800	0
GO:0016846	carbon-sulfur lyase activity	0.03	0.03	51	1 (1.96%)	TraesCS5A03G1073800	0
GO:0009631	cold acclimation	0.0001658	0.0001741	29	2 (6.9%)	TraesCS6D03G0772500;TraesCS6D03G0772300	0
GO:0009409	response to cold	0.004979	0.005218	161	2 (1.24%)	TraesCS6D03G0772500;TraesCS6D03G0772300	0
GO:0009414	response to water deprivation	0.01	0.01	274	2 (0.73%)	TraesCS6D03G0772500;TraesCS6D03G0772300	0
GO:0001101	response to acid chemical	0.02	0.02	312	2 (0.64%)	TraesCS6D03G0772500;TraesCS6D03G0772300	0
GO:0009415	response to water	0.02	0.02	308	2 (0.65%)	TraesCS6D03G0772500;TraesCS6D03G0772300	0
GO:0009266	response to temperature stimulus	0.02	0.02	312	2 (0.64%)	TraesCS6D03G0772500;TraesCS6D03G0772300	0
GO:0010035	response to inorganic substance	0.04	0.05	519	2 (0.39%)	TraesCS6D03G0772500;TraesCS6D03G0772300	0
GO:0097305	response to alcohol	3.639e-05	3.827e-05	284	4 (1.41%)	TraesCS7A03G0517200;TraesCS6D03G0772500;TraesCS6D03G0772300;TraesCS1D03G0421900	0
GO:0009737	response to abscisic acid	3.639e-05	3.827e-05	284	4 (1.41%)	TraesCS7A03G0517200;TraesCS6D03G0772500;TraesCS6D03G0772300;TraesCS1D03G0421900	0
GO:0033993	response to lipid	0.0001351	0.000142	399	4 (1%)	TraesCS7A03G0517200;TraesCS6D03G0772500;TraesCS6D03G0772300;TraesCS1D03G0421900	0
GO:1901700	response to oxygen-containing compound	0.00198	0.002076	819	4 (0.49%)	TraesCS7A03G0517200;TraesCS6D03G0772500;TraesCS6D03G0772300;TraesCS1D03G0421900	0
GO:0009725	response to hormone	0.004352	0.004563	1021	4 (0.39%)	TraesCS7A03G0517200;TraesCS6D03G0772500;TraesCS6D03G0772300;TraesCS1D03G0421900	0
GO:0009719	response to endogenous stimulus	0.004367	0.004578	1022	4 (0.39%)	TraesCS7A03G0517200;TraesCS6D03G0772500;TraesCS6D03G0772300;TraesCS1D03G0421900	0
GO:0010033	response to organic substance	0.006981	0.007309	1169	4 (0.34%)	TraesCS7A03G0517200;TraesCS6D03G0772500;TraesCS6D03G0772300;TraesCS1D03G0421900	0
GO:0042221	response to chemical	0.03	0.03	1733	4 (0.23%)	TraesCS7A03G0517200;TraesCS6D03G0772500;TraesCS6D03G0772300;TraesCS1D03G0421900	0
GO:0009793	embryo development ending in seed dormancy	0.006447	0.006753	184	2 (1.09%)	TraesCS7D03G0109900;TraesCS7D03G0087400	0
GO:0009790	embryo development	0.006651	0.006965	187	2 (1.07%)	TraesCS7D03G0109900;TraesCS7D03G0087400	0
GO:0048316	seed development	0.009732	0.01	228	2 (0.88%)	TraesCS7D03G0109900;TraesCS7D03G0087400	0
GO:0010154	fruit development	0.01	0.01	237	2 (0.84%)	TraesCS7D03G0109900;TraesCS7D03G0087400	0
GO:0061458	reproductive system development	0.03	0.03	407	2 (0.49%)	TraesCS7D03G0109900;TraesCS7D03G0087400	1
GO:0048608	reproductive structure development	0.03	0.03	407	2 (0.49%)	TraesCS7D03G0109900;TraesCS7D03G0087400	1
GO:0003006	developmental process involved in reproduction	0.04	0.04	463	2 (0.43%)	TraesCS7D03G0109900;TraesCS7D03G0087400	1
GO:0009791	post-embryonic development	0.05	0.05	532	2 (0.38%)	TraesCS7D03G0109900;TraesCS7D03G0087400	1
GO:0006086	acetyl-CoA biosynthetic process from pyruvate	0.01	0.01	20	1 (5%)	TraesCS7D03G0446000	0
GO:0004738	pyruvate dehydrogenase activity	0.01	0.01	20	1 (5%)	TraesCS7D03G0446000	0
GO:0004739	pyruvate dehydrogenase (acetyl-transferring) activity	0.01	0.01	20	1 (5%)	TraesCS7D03G0446000	0
GO:0035384	thioester biosynthetic process	0.02	0.02	33	1 (3.03%)	TraesCS7D03G0446000	0
GO:0071616	acyl-CoA biosynthetic process	0.02	0.02	33	1 (3.03%)	TraesCS7D03G0446000	0
GO:0006085	acetyl-CoA biosynthetic process	0.02	0.02	26	1 (3.85%)	TraesCS7D03G0446000	0
GO:0016624	oxidoreductase activity, acting on the aldehyde or oxo group of donors, disulfide as acceptor	0.02	0.02	31	1 (3.23%)	TraesCS7D03G0446000	0
GO:0006084	acetyl-CoA metabolic process	0.03	0.03	46	1 (2.17%)	TraesCS7D03G0446000	0
GO:0033866	nucleoside bisphosphate biosynthetic process	0.03	0.03	48	1 (2.08%)	TraesCS7D03G0446000	0
GO:0034030	ribonucleoside bisphosphate biosynthetic process	0.03	0.03	48	1 (2.08%)	TraesCS7D03G0446000	0
GO:0034033	purine nucleoside bisphosphate biosynthetic process	0.03	0.03	48	1 (2.08%)	TraesCS7D03G0446000	0
GO:0035383	thioester metabolic process	0.04	0.04	64	1 (1.56%)	TraesCS7D03G0446000	0
GO:0006637	acyl-CoA metabolic process	0.04	0.04	64	1 (1.56%)	TraesCS7D03G0446000	0

## Sheet: GO_P0202∩C22∩K00 
Gene Count:	5
Background Gene Count:	75477
Ontology:	E:\GOAnalyzer\Deployment\Data\gofiles\go-basic.obo
Annotation:	E:\GOAnalyzer\Deployment\data\gofiles\Gene-GO_association.wheat2022
Hierarchy:	All
Correction:	BH FDR p-value adjustment
Max Path Length From Leaf:	N/A
Min Path Length From Root:	3
GO ID	Description	P-Value	Corrected P-Value	Total Genes	Matched Gene Counts	Matched Genes
GO:0005544	calcium-dependent phospholipid binding	0.002978	0.003004	45	1 (2.22%)	TraesCS1B03G0711800
GO:0005543	phospholipid binding	0.009372	0.009451	142	1 (0.7%)	TraesCS1B03G0711800
GO:0008289	lipid binding	0.03	0.03	519	1 (0.19%)	TraesCS1B03G0711800
GO:0022803	passive transmembrane transporter activity	0.03	0.03	490	1 (0.2%)	TraesCS5B03G0835100
GO:0015267	channel activity	0.03	0.03	490	1 (0.2%)	TraesCS5B03G0835100
GO:0090599	alpha-glucosidase activity	0.002052	0.002071	31	1 (3.23%)	TraesCS7A03G0020800
GO:0004575	sucrose alpha-glucosidase activity	0.002052	0.002071	31	1 (3.23%)	TraesCS7A03G0020800
GO:0004564	beta-fructofuranosidase activity	0.002316	0.002338	35	1 (2.86%)	TraesCS7A03G0020800
GO:0015926	glucosidase activity	0.004695	0.004736	71	1 (1.41%)	TraesCS7A03G0020800
GO:0016020	membrane	0.01	0.01	17900	4 (0.02%)	TraesCS7A03G0020800;TraesCS7D03G0081000;TraesCS3B03G1158700;TraesCS5B03G0835100
GO:0006633	fatty acid biosynthetic process	0.02	0.02	305	1 (0.33%)	TraesCS7D03G0081000
GO:0006631	fatty acid metabolic process	0.03	0.03	382	1 (0.26%)	TraesCS7D03G0081000
GO:0072330	monocarboxylic acid biosynthetic process	0.03	0.03	382	1 (0.26%)	TraesCS7D03G0081000
GO:0032787	monocarboxylic acid metabolic process	0.05	0.05	737	1 (0.14%)	TraesCS7D03G0081000

## Sheet: GO_P1010∩C22∩K00 
Gene Count:	51
Background Gene Count:	75477
Ontology:	E:\GOAnalyzer\Deployment\Data\gofiles\go-basic.obo
Annotation:	E:\GOAnalyzer\Deployment\data\gofiles\Gene-GO_association.wheat2022
Hierarchy:	All
Correction:	BH FDR p-value adjustment
Max Path Length From Leaf:	N/A
Min Path Length From Root:	3
GO ID	Description	P-Value	Corrected P-Value	Total Genes	Matched Gene Counts	Matched Genes
GO:0043167	ion binding	8.407e-05	8.886e-05	20480	27 (0.13%)	TraesCS1A03G0186700;TraesCS5B03G0492200;TraesCS5D03G0104900;TraesCS3D03G0118500;TraesCS4B03G0768300;TraesCS7D03G1105900;TraesCS7B03G0110500;TraesCS6D03G0269100;TraesCS1D03G0036500;TraesCS5D03G0455000;TraesCS3D03G0884400;TraesCS5B03G1345500;TraesCS6D03G0135100;TraesCS6B03G0405500;TraesCS2A03G1015600;TraesCS6D03G0269200;TraesCS1A03G0114500;TraesCS2D03G0955800;TraesCS6B03G0007800;TraesCS2A03G0062000…	0
GO:0032774	RNA biosynthetic process	0.03	0.03	1692	4 (0.24%)	TraesCS2A03G0643000;TraesCS2A03G0362900;TraesCS4B03G0673800;TraesCS2B03G0727900	0
GO:0097659	nucleic acid-templated transcription	0.03	0.03	1685	4 (0.24%)	TraesCS2A03G0643000;TraesCS2A03G0362900;TraesCS4B03G0673800;TraesCS2B03G0727900	0
GO:0006351	transcription, DNA-templated	0.03	0.03	1683	4 (0.24%)	TraesCS2A03G0643000;TraesCS2A03G0362900;TraesCS4B03G0673800;TraesCS2B03G0727900	0
GO:0035250	UDP-galactosyltransferase activity	0.007408	0.007748	11	1 (9.09%)	TraesCS2B03G0260600	0
GO:0047216	inositol 3-alpha-galactosyltransferase activity	0.007408	0.007748	11	1 (9.09%)	TraesCS2B03G0260600	0
GO:0006012	galactose metabolic process	0.03	0.03	43	1 (2.33%)	TraesCS2B03G0260600	0
GO:0030639	polyketide biosynthetic process	0.009419	0.009838	14	1 (7.14%)	TraesCS2D03G0045100	0
GO:0030638	polyketide metabolic process	0.01	0.01	16	1 (6.25%)	TraesCS2D03G0045100	0
GO:0000977	RNA polymerase II transcription regulatory region sequence-specific DNA binding	2.109e-05	2.233e-05	237	4 (1.69%)	TraesCS2D03G0605600;TraesCS2A03G0643000;TraesCS2A03G0362900;TraesCS2B03G0727900	0
GO:0045944	positive regulation of transcription by RNA polymerase II	3.357e-05	3.553e-05	267	4 (1.5%)	TraesCS2D03G0605600;TraesCS2A03G0643000;TraesCS2A03G0362900;TraesCS2B03G0727900	0
GO:0001067	transcription regulatory region nucleic acid binding	0.0001021	0.0001078	356	4 (1.12%)	TraesCS2D03G0605600;TraesCS2A03G0643000;TraesCS2A03G0362900;TraesCS2B03G0727900	0
GO:0000976	transcription cis-regulatory region binding	0.0001021	0.0001078	356	4 (1.12%)	TraesCS2D03G0605600;TraesCS2A03G0643000;TraesCS2A03G0362900;TraesCS2B03G0727900	0
GO:1990837	sequence-specific double-stranded DNA binding	0.0001135	0.0001199	366	4 (1.09%)	TraesCS2D03G0605600;TraesCS2A03G0643000;TraesCS2A03G0362900;TraesCS2B03G0727900	0
GO:1902680	positive regulation of RNA biosynthetic process	0.0002138	0.0002254	432	4 (0.93%)	TraesCS2D03G0605600;TraesCS2A03G0643000;TraesCS2A03G0362900;TraesCS2B03G0727900	0
GO:1903508	positive regulation of nucleic acid-templated transcription	0.0002138	0.0002254	432	4 (0.93%)	TraesCS2D03G0605600;TraesCS2A03G0643000;TraesCS2A03G0362900;TraesCS2B03G0727900	0
GO:0045893	positive regulation of transcription, DNA-templated	0.0002138	0.0002254	432	4 (0.93%)	TraesCS2D03G0605600;TraesCS2A03G0643000;TraesCS2A03G0362900;TraesCS2B03G0727900	0
GO:0051254	positive regulation of RNA metabolic process	0.0002826	0.0002978	465	4 (0.86%)	TraesCS2D03G0605600;TraesCS2A03G0643000;TraesCS2A03G0362900;TraesCS2B03G0727900	0
GO:0010557	positive regulation of macromolecule biosynthetic process	0.0002896	0.0003051	468	4 (0.85%)	TraesCS2D03G0605600;TraesCS2A03G0643000;TraesCS2A03G0362900;TraesCS2B03G0727900	0
GO:0045935	positive regulation of nucleobase-containing compound metabolic process	0.0002967	0.0003124	471	4 (0.85%)	TraesCS2D03G0605600;TraesCS2A03G0643000;TraesCS2A03G0362900;TraesCS2B03G0727900	0
GO:0031328	positive regulation of cellular biosynthetic process	0.0003039	0.0003199	474	4 (0.84%)	TraesCS2D03G0605600;TraesCS2A03G0643000;TraesCS2A03G0362900;TraesCS2B03G0727900	0
GO:0009891	positive regulation of biosynthetic process	0.0003137	0.0003301	478	4 (0.84%)	TraesCS2D03G0605600;TraesCS2A03G0643000;TraesCS2A03G0362900;TraesCS2B03G0727900	0
GO:0006357	regulation of transcription by RNA polymerase II	0.0005798	0.0006099	563	4 (0.71%)	TraesCS2D03G0605600;TraesCS2A03G0643000;TraesCS2A03G0362900;TraesCS2B03G0727900	0
GO:0051173	positive regulation of nitrogen compound metabolic process	0.0006646	0.0006985	584	4 (0.68%)	TraesCS2D03G0605600;TraesCS2A03G0643000;TraesCS2A03G0362900;TraesCS2B03G0727900	0
GO:0031325	positive regulation of cellular metabolic process	0.0006991	0.0007346	592	4 (0.68%)	TraesCS2D03G0605600;TraesCS2A03G0643000;TraesCS2A03G0362900;TraesCS2B03G0727900	0
GO:0010604	positive regulation of macromolecule metabolic process	0.0007303	0.0007672	599	4 (0.67%)	TraesCS2D03G0605600;TraesCS2A03G0643000;TraesCS2A03G0362900;TraesCS2B03G0727900	0
GO:0009893	positive regulation of metabolic process	0.0008054	0.0008458	615	4 (0.65%)	TraesCS2D03G0605600;TraesCS2A03G0643000;TraesCS2A03G0362900;TraesCS2B03G0727900	0
GO:0048522	positive regulation of cellular process	0.001311	0.001375	702	4 (0.57%)	TraesCS2D03G0605600;TraesCS2A03G0643000;TraesCS2A03G0362900;TraesCS2B03G0727900	0
GO:0003690	double-stranded DNA binding	0.001735	0.001819	758	4 (0.53%)	TraesCS2D03G0605600;TraesCS2A03G0643000;TraesCS2A03G0362900;TraesCS2B03G0727900	0
GO:0048518	positive regulation of biological process	0.002851	0.002987	870	4 (0.46%)	TraesCS2D03G0605600;TraesCS2A03G0643000;TraesCS2A03G0362900;TraesCS2B03G0727900	0
GO:0046983	protein dimerization activity	0.04	0.04	1834	4 (0.22%)	TraesCS2D03G0605600;TraesCS2A03G0643000;TraesCS2A03G0362900;TraesCS2B03G0727900	0
GO:0043565	sequence-specific DNA binding	0.0009369	0.0009836	1116	5 (0.45%)	TraesCS2D03G0605600;TraesCS3B03G0309700;TraesCS2A03G0643000;TraesCS2A03G0362900;TraesCS2B03G0727900	0
GO:0003700	DNA-binding transcription factor activity	0.01	0.02	2146	5 (0.23%)	TraesCS2D03G0605600;TraesCS3B03G0309700;TraesCS2A03G0643000;TraesCS2A03G0362900;TraesCS2B03G0727900	0
GO:0050789	regulation of biological process	0.01	0.01	7510	11 (0.15%)	TraesCS2D03G0605600;TraesCS3B03G0309700;TraesCS7D03G0250300;TraesCS2A03G0643000;TraesCS7B03G0031800;TraesCS2A03G0362900;TraesCS4B03G0673800;TraesCS3A03G0331600;TraesCS2B03G0727900;TraesCS7A03G0272100;TraesCS2D03G0241000	0
GO:0097159	organic cyclic compound binding	0.04	0.04	24589	23 (0.09%)	TraesCS2D03G0605600;TraesCS6B03G0007800;TraesCS2A03G0062000;TraesCS2B03G1411500;TraesCS1A03G0186700;TraesCS3D03G0935000;TraesCS5B03G0492200;TraesCS2A03G0362900;TraesCS3D03G0118500;TraesCS4B03G0768300;TraesCS7D03G1105900;TraesCS3B03G0309700;TraesCS1D03G0036500;TraesCS2A03G0643000;TraesCS5D03G0455000;TraesCS2A03G1132800;TraesCS4B03G0673800;TraesCS4B03G0923500;TraesCS2B03G0727900;TraesCS2D03G0033000…	0
GO:1901363	heterocyclic compound binding	0.04	0.04	24588	23 (0.09%)	TraesCS2D03G0605600;TraesCS6B03G0007800;TraesCS2A03G0062000;TraesCS2B03G1411500;TraesCS1A03G0186700;TraesCS3D03G0935000;TraesCS5B03G0492200;TraesCS2A03G0362900;TraesCS3D03G0118500;TraesCS4B03G0768300;TraesCS7D03G1105900;TraesCS3B03G0309700;TraesCS1D03G0036500;TraesCS2A03G0643000;TraesCS5D03G0455000;TraesCS2A03G1132800;TraesCS4B03G0673800;TraesCS4B03G0923500;TraesCS2B03G0727900;TraesCS2D03G0033000…	0
GO:0016102	diterpenoid biosynthetic process	0.02	0.02	24	1 (4.17%)	TraesCS2D03G0955800	0
GO:0016101	diterpenoid metabolic process	0.03	0.03	38	1 (2.63%)	TraesCS2D03G0955800	0
GO:0016829	lyase activity	6.799e-06	7.211e-06	1052	7 (0.67%)	TraesCS2D03G0955800;TraesCS5A03G0568100;TraesCS5A03G1040500;TraesCS5D03G0534100;TraesCS6D03G0135100;TraesCS2A03G1015600;TraesCS6D03G0102300	0
GO:1901576	organic substance biosynthetic process	0.006486	0.006784	7032	11 (0.16%)	TraesCS2D03G0955800;TraesCS5A03G0568100;TraesCS5D03G0534100;TraesCS2A03G0643000;TraesCS5D03G0104900;TraesCS2A03G0362900;TraesCS4B03G0673800;TraesCS2B03G0727900;TraesCS2D03G0045100;TraesCS6B03G0405500;TraesCS6D03G0269200	0
GO:0009058	biosynthetic process	0.009891	0.01	7451	11 (0.15%)	TraesCS2D03G0955800;TraesCS5A03G0568100;TraesCS5D03G0534100;TraesCS2A03G0643000;TraesCS5D03G0104900;TraesCS2A03G0362900;TraesCS4B03G0673800;TraesCS2B03G0727900;TraesCS2D03G0045100;TraesCS6B03G0405500;TraesCS6D03G0269200	0
GO:0044249	cellular biosynthetic process	0.01	0.02	6840	10 (0.15%)	TraesCS2D03G0955800;TraesCS5A03G0568100;TraesCS5D03G0534100;TraesCS2A03G0643000;TraesCS5D03G0104900;TraesCS2A03G0362900;TraesCS4B03G0673800;TraesCS2B03G0727900;TraesCS6B03G0405500;TraesCS6D03G0269200	0
GO:0016835	carbon-oxygen lyase activity	1.337e-05	1.417e-05	447	5 (1.12%)	TraesCS2D03G0955800;TraesCS5A03G1040500;TraesCS6D03G0135100;TraesCS2A03G1015600;TraesCS6D03G0102300	0
GO:0046872	metal ion binding	4.137e-05	4.377e-05	8842	17 (0.19%)	TraesCS2D03G0955800;TraesCS6B03G0007800;TraesCS2B03G1411500;TraesCS3D03G0935000;TraesCS5D03G0104900;TraesCS3D03G0118500;TraesCS4B03G0768300;TraesCS6D03G0102300;TraesCS7B03G0110500;TraesCS6D03G0269100;TraesCS3D03G0884400;TraesCS6D03G0135100;TraesCS6B03G0405500;TraesCS2A03G1015600;TraesCS6D03G0269200;TraesCS1A03G0114500;TraesCS2D03G1305500	0
GO:0043169	cation binding	4.578e-05	4.842e-05	8912	17 (0.19%)	TraesCS2D03G0955800;TraesCS6B03G0007800;TraesCS2B03G1411500;TraesCS3D03G0935000;TraesCS5D03G0104900;TraesCS3D03G0118500;TraesCS4B03G0768300;TraesCS6D03G0102300;TraesCS7B03G0110500;TraesCS6D03G0269100;TraesCS3D03G0884400;TraesCS6D03G0135100;TraesCS6B03G0405500;TraesCS2A03G1015600;TraesCS6D03G0269200;TraesCS1A03G0114500;TraesCS2D03G1305500	0
GO:0044237	cellular metabolic process	0.02	0.02	20463	21 (0.1%)	TraesCS2D03G0955800;TraesCS6B03G0007800;TraesCS5A03G1040500;TraesCS7D03G0250300;TraesCS2B03G1411500;TraesCS5B03G0492200;TraesCS5D03G0104900;TraesCS2A03G0362900;TraesCS5B03G0598900;TraesCS5A03G0568100;TraesCS5D03G0534100;TraesCS2A03G0643000;TraesCS5D03G0455000;TraesCS2A03G1132800;TraesCS4B03G0673800;TraesCS2B03G0727900;TraesCS2D03G0033000;TraesCS5B03G1345500;TraesCS6B03G0405500;TraesCS6D03G0269200…	0
GO:0010333	terpene synthase activity	7.644e-06	8.105e-06	183	4 (2.19%)	TraesCS2D03G0955800;TraesCS6D03G0135100;TraesCS2A03G1015600;TraesCS6D03G0102300	0
GO:0016838	carbon-oxygen lyase activity, acting on phosphates	9.426e-06	9.99e-06	193	4 (2.07%)	TraesCS2D03G0955800;TraesCS6D03G0135100;TraesCS2A03G1015600;TraesCS6D03G0102300	0
GO:0000287	magnesium ion binding	0.0003039	0.0003199	474	4 (0.84%)	TraesCS2D03G0955800;TraesCS6D03G0135100;TraesCS2A03G1015600;TraesCS6D03G0102300	0
GO:0015860	purine nucleoside transmembrane transport	0.003374	0.003534	5	1 (20%)	TraesCS2D03G1013200	0
GO:0015858	nucleoside transport	0.008749	0.009146	13	1 (7.69%)	TraesCS2D03G1013200	0
GO:1901642	nucleoside transmembrane transport	0.008749	0.009146	13	1 (7.69%)	TraesCS2D03G1013200	0
GO:0072530	purine-containing compound transmembrane transport	0.01	0.02	22	1 (4.55%)	TraesCS2D03G1013200	0
GO:0005337	nucleoside transmembrane transporter activity	0.04	0.04	65	1 (1.54%)	TraesCS2D03G1013200	0
GO:0015211	purine nucleoside transmembrane transporter activity	0.04	0.04	57	1 (1.75%)	TraesCS2D03G1013200	0
GO:1901264	carbohydrate derivative transport	0.05	0.05	69	1 (1.45%)	TraesCS2D03G1013200	0
GO:0044106	cellular amine metabolic process	0.0001874	0.0001976	162	3 (1.85%)	TraesCS5A03G0568100;TraesCS5A03G1040500;TraesCS5D03G0534100	0
GO:0006576	cellular biogenic amine metabolic process	0.0001874	0.0001976	162	3 (1.85%)	TraesCS5A03G0568100;TraesCS5A03G1040500;TraesCS5D03G0534100	0
GO:0009308	amine metabolic process	0.0006271	0.0006593	245	3 (1.22%)	TraesCS5A03G0568100;TraesCS5A03G1040500;TraesCS5D03G0534100	0
GO:0044281	small molecule metabolic process	0.005336	0.005585	3180	7 (0.22%)	TraesCS5A03G0568100;TraesCS5A03G1040500;TraesCS5D03G0534100;TraesCS5D03G0104900;TraesCS2B03G0260600;TraesCS6B03G0405500;TraesCS6D03G0269200	0
GO:0046499	S-adenosylmethioninamine metabolic process	1.25e-05	1.325e-05	8	2 (25%)	TraesCS5A03G0568100;TraesCS5D03G0534100	0
GO:0006557	S-adenosylmethioninamine biosynthetic process	1.25e-05	1.325e-05	8	2 (25%)	TraesCS5A03G0568100;TraesCS5D03G0534100	0
GO:0006597	spermine biosynthetic process	1.607e-05	1.702e-05	9	2 (22.22%)	TraesCS5A03G0568100;TraesCS5D03G0534100	0
GO:0004014	adenosylmethionine decarboxylase activity	1.607e-05	1.702e-05	9	2 (22.22%)	TraesCS5A03G0568100;TraesCS5D03G0534100	0
GO:0008215	spermine metabolic process	2.007e-05	2.126e-05	10	2 (20%)	TraesCS5A03G0568100;TraesCS5D03G0534100	0
GO:0034404	nucleobase-containing small molecule biosynthetic process	6.048e-05	6.396e-05	17	2 (11.76%)	TraesCS5A03G0568100;TraesCS5D03G0534100	0
GO:0009163	nucleoside biosynthetic process	6.048e-05	6.396e-05	17	2 (11.76%)	TraesCS5A03G0568100;TraesCS5D03G0534100	0
GO:0042451	purine nucleoside biosynthetic process	6.048e-05	6.396e-05	17	2 (11.76%)	TraesCS5A03G0568100;TraesCS5D03G0534100	0
GO:0042455	ribonucleoside biosynthetic process	6.048e-05	6.396e-05	17	2 (11.76%)	TraesCS5A03G0568100;TraesCS5D03G0534100	0
GO:0046129	purine ribonucleoside biosynthetic process	6.048e-05	6.396e-05	17	2 (11.76%)	TraesCS5A03G0568100;TraesCS5D03G0534100	0
GO:1901659	glycosyl compound biosynthetic process	7.598e-05	8.033e-05	19	2 (10.53%)	TraesCS5A03G0568100;TraesCS5D03G0534100	0
GO:0008216	spermidine metabolic process	8.439e-05	8.918e-05	20	2 (10%)	TraesCS5A03G0568100;TraesCS5D03G0534100	0
GO:0008295	spermidine biosynthetic process	8.439e-05	8.918e-05	20	2 (10%)	TraesCS5A03G0568100;TraesCS5D03G0534100	0
GO:0042278	purine nucleoside metabolic process	0.0002477	0.0002611	34	2 (5.88%)	TraesCS5A03G0568100;TraesCS5D03G0534100	0
GO:0046128	purine ribonucleoside metabolic process	0.0002477	0.0002611	34	2 (5.88%)	TraesCS5A03G0568100;TraesCS5D03G0534100	0
GO:0009119	ribonucleoside metabolic process	0.0002936	0.0003093	37	2 (5.41%)	TraesCS5A03G0568100;TraesCS5D03G0534100	0
GO:0006596	polyamine biosynthetic process	0.0006034	0.0006345	53	2 (3.77%)	TraesCS5A03G0568100;TraesCS5D03G0534100	0
GO:0006595	polyamine metabolic process	0.0006497	0.0006829	55	2 (3.64%)	TraesCS5A03G0568100;TraesCS5D03G0534100	0
GO:0009116	nucleoside metabolic process	0.00196	0.002055	96	2 (2.08%)	TraesCS5A03G0568100;TraesCS5D03G0534100	0
GO:1901657	glycosyl compound metabolic process	0.002082	0.002183	99	2 (2.02%)	TraesCS5A03G0568100;TraesCS5D03G0534100	0
GO:0009309	amine biosynthetic process	0.002338	0.00245	105	2 (1.9%)	TraesCS5A03G0568100;TraesCS5D03G0534100	0
GO:0042401	cellular biogenic amine biosynthetic process	0.002338	0.00245	105	2 (1.9%)	TraesCS5A03G0568100;TraesCS5D03G0534100	0
GO:0044272	sulfur compound biosynthetic process	0.009817	0.01	220	2 (0.91%)	TraesCS5A03G0568100;TraesCS5D03G0534100	0
GO:0016831	carboxy-lyase activity	0.01	0.01	247	2 (0.81%)	TraesCS5A03G0568100;TraesCS5D03G0534100	0
GO:0072522	purine-containing compound biosynthetic process	0.02	0.02	349	2 (0.57%)	TraesCS5A03G0568100;TraesCS5D03G0534100	0
GO:0016830	carbon-carbon lyase activity	0.02	0.02	327	2 (0.61%)	TraesCS5A03G0568100;TraesCS5D03G0534100	0
GO:0034654	nucleobase-containing compound biosynthetic process	0.003971	0.004159	2248	6 (0.27%)	TraesCS5A03G0568100;TraesCS5D03G0534100;TraesCS2A03G0643000;TraesCS2A03G0362900;TraesCS4B03G0673800;TraesCS2B03G0727900	0
GO:0019438	aromatic compound biosynthetic process	0.008767	0.009163	2655	6 (0.23%)	TraesCS5A03G0568100;TraesCS5D03G0534100;TraesCS2A03G0643000;TraesCS2A03G0362900;TraesCS4B03G0673800;TraesCS2B03G0727900	0
GO:0018130	heterocycle biosynthetic process	0.008829	0.009225	2659	6 (0.23%)	TraesCS5A03G0568100;TraesCS5D03G0534100;TraesCS2A03G0643000;TraesCS2A03G0362900;TraesCS4B03G0673800;TraesCS2B03G0727900	0
GO:1901362	organic cyclic compound biosynthetic process	0.01	0.01	2877	6 (0.21%)	TraesCS5A03G0568100;TraesCS5D03G0534100;TraesCS2A03G0643000;TraesCS2A03G0362900;TraesCS4B03G0673800;TraesCS2B03G0727900	0
GO:0044283	small molecule biosynthetic process	0.0008822	0.0009263	1101	5 (0.45%)	TraesCS5A03G0568100;TraesCS5D03G0534100;TraesCS5D03G0104900;TraesCS6B03G0405500;TraesCS6D03G0269200	0
GO:0004834	tryptophan synthase activity	0.02	0.02	31	1 (3.23%)	TraesCS5A03G1040500	0
GO:0006586	indolalkylamine metabolic process	0.05	0.05	73	1 (1.37%)	TraesCS5A03G1040500	0
GO:0006568	tryptophan metabolic process	0.05	0.05	73	1 (1.37%)	TraesCS5A03G1040500	0
GO:0006082	organic acid metabolic process	0.04	0.05	1975	4 (0.2%)	TraesCS5A03G1040500;TraesCS5D03G0104900;TraesCS6B03G0405500;TraesCS6D03G0269200	0
GO:0043436	oxoacid metabolic process	0.04	0.04	1934	4 (0.21%)	TraesCS5A03G1040500;TraesCS5D03G0104900;TraesCS6B03G0405500;TraesCS6D03G0269200	0
GO:0019752	carboxylic acid metabolic process	0.04	0.04	1916	4 (0.21%)	TraesCS5A03G1040500;TraesCS5D03G0104900;TraesCS6B03G0405500;TraesCS6D03G0269200	0
GO:0031408	oxylipin biosynthetic process	3.275e-06	3.476e-06	42	3 (7.14%)	TraesCS5D03G0104900;TraesCS6B03G0405500;TraesCS6D03G0269200	0
GO:0031407	oxylipin metabolic process	3.519e-06	3.734e-06	43	3 (6.98%)	TraesCS5D03G0104900;TraesCS6B03G0405500;TraesCS6D03G0269200	0
GO:0016053	organic acid biosynthetic process	0.02	0.02	872	3 (0.34%)	TraesCS5D03G0104900;TraesCS6B03G0405500;TraesCS6D03G0269200	0
GO:0046394	carboxylic acid biosynthetic process	0.02	0.02	812	3 (0.37%)	TraesCS5D03G0104900;TraesCS6B03G0405500;TraesCS6D03G0269200	0
GO:0030247	polysaccharide binding	0.05	0.05	514	2 (0.39%)	TraesCS6B03G0007800;TraesCS2B03G1411500	0
GO:0030246	carbohydrate binding	0.007826	0.008183	1160	4 (0.34%)	TraesCS6B03G0007800;TraesCS2B03G1411500;TraesCS2D03G0033000;TraesCS7D03G0003200	0
GO:0016310	phosphorylation	0.03	0.03	5575	8 (0.14%)	TraesCS6B03G0007800;TraesCS7D03G0250300;TraesCS5D03G0455000;TraesCS2B03G1411500;TraesCS2A03G1132800;TraesCS5B03G0492200;TraesCS2D03G0033000;TraesCS5B03G1345500	0
GO:0016301	kinase activity	0.04	0.04	5884	8 (0.14%)	TraesCS6B03G0007800;TraesCS7D03G0250300;TraesCS5D03G0455000;TraesCS2B03G1411500;TraesCS2A03G1132800;TraesCS5B03G0492200;TraesCS2D03G0033000;TraesCS5B03G1345500	0
GO:0016702	oxidoreductase activity, acting on single donors with incorporation of molecular oxygen, incorporation of two atoms of oxygen	2.429e-06	2.58e-06	137	4 (2.92%)	TraesCS6D03G0269100;TraesCS5D03G0104900;TraesCS6B03G0405500;TraesCS6D03G0269200	0
GO:0016701	oxidoreductase activity, acting on single donors with incorporation of molecular oxygen	6.702e-06	7.11e-06	177	4 (2.26%)	TraesCS6D03G0269100;TraesCS5D03G0104900;TraesCS6B03G0405500;TraesCS6D03G0269200	0
GO:0051213	dioxygenase activity	9.047e-06	9.591e-06	191	4 (2.09%)	TraesCS6D03G0269100;TraesCS5D03G0104900;TraesCS6B03G0405500;TraesCS6D03G0269200	0
GO:0016491	oxidoreductase activity	0.001206	0.001265	6583	12 (0.18%)	TraesCS7B03G0110500;TraesCS6D03G0269100;TraesCS5D03G0104900;TraesCS3D03G0118500;TraesCS3D03G0884400;TraesCS4B03G0923500;TraesCS4B03G0768300;TraesCS6B03G0405500;TraesCS6D03G0269200;TraesCS1A03G0114500;TraesCS5B03G0715800;TraesCS2D03G1305500	1
GO:0022414	reproductive process	0.001199	0.001259	1180	5 (0.42%)	TraesCS7D03G0250300;TraesCS2A03G1132800;TraesCS7B03G0031800;TraesCS3A03G0331600;TraesCS7A03G0272100	0
GO:0010229	inflorescence development	4.052e-05	4.288e-05	14	2 (14.29%)	TraesCS7D03G0250300;TraesCS7B03G0031800	0
GO:0048506	regulation of timing of meristematic phase transition	9.323e-05	9.85e-05	21	2 (9.52%)	TraesCS7D03G0250300;TraesCS7B03G0031800	0
GO:0048510	regulation of timing of transition from vegetative to reproductive phase	9.323e-05	9.85e-05	21	2 (9.52%)	TraesCS7D03G0250300;TraesCS7B03G0031800	0
GO:0040034	regulation of development, heterochronic	0.0001224	0.0001292	24	2 (8.33%)	TraesCS7D03G0250300;TraesCS7B03G0031800	0
GO:0048509	regulation of meristem development	0.0001673	0.0001765	28	2 (7.14%)	TraesCS7D03G0250300;TraesCS7B03G0031800	0
GO:0090567	reproductive shoot system development	0.005254	0.005501	159	2 (1.26%)	TraesCS7D03G0250300;TraesCS7B03G0031800	0
GO:0048367	shoot system development	0.01	0.01	262	2 (0.76%)	TraesCS7D03G0250300;TraesCS7B03G0031800	0
GO:0008429	phosphatidylethanolamine binding	2.77e-12	2.947e-12	6	4 (66.67%)	TraesCS7D03G0250300;TraesCS7B03G0031800;TraesCS3A03G0331600;TraesCS7A03G0272100	0
GO:0048573	photoperiodism, flowering	7.11e-10	7.565e-10	19	4 (21.05%)	TraesCS7D03G0250300;TraesCS7B03G0031800;TraesCS3A03G0331600;TraesCS7A03G0272100	0
GO:0009648	photoperiodism	1.621e-09	1.724e-09	23	4 (17.39%)	TraesCS7D03G0250300;TraesCS7B03G0031800;TraesCS3A03G0331600;TraesCS7A03G0272100	0
GO:0010228	vegetative to reproductive phase transition of meristem	1.494e-08	1.588e-08	39	4 (10.26%)	TraesCS7D03G0250300;TraesCS7B03G0031800;TraesCS3A03G0331600;TraesCS7A03G0272100	0
GO:0005543	phospholipid binding	2.801e-06	2.974e-06	142	4 (2.82%)	TraesCS7D03G0250300;TraesCS7B03G0031800;TraesCS3A03G0331600;TraesCS7A03G0272100	0
GO:0009416	response to light stimulus	0.0001112	0.0001174	364	4 (1.1%)	TraesCS7D03G0250300;TraesCS7B03G0031800;TraesCS3A03G0331600;TraesCS7A03G0272100	0
GO:0009314	response to radiation	0.0001298	0.000137	379	4 (1.06%)	TraesCS7D03G0250300;TraesCS7B03G0031800;TraesCS3A03G0331600;TraesCS7A03G0272100	0
GO:0061458	reproductive system development	0.0001704	0.0001798	407	4 (0.98%)	TraesCS7D03G0250300;TraesCS7B03G0031800;TraesCS3A03G0331600;TraesCS7A03G0272100	1
GO:0048608	reproductive structure development	0.0001704	0.0001798	407	4 (0.98%)	TraesCS7D03G0250300;TraesCS7B03G0031800;TraesCS3A03G0331600;TraesCS7A03G0272100	1
GO:0003006	developmental process involved in reproduction	0.000278	0.0002931	463	4 (0.86%)	TraesCS7D03G0250300;TraesCS7B03G0031800;TraesCS3A03G0331600;TraesCS7A03G0272100	1
GO:0008289	lipid binding	0.0004276	0.00045	519	4 (0.77%)	TraesCS7D03G0250300;TraesCS7B03G0031800;TraesCS3A03G0331600;TraesCS7A03G0272100	0
GO:0009791	post-embryonic development	0.0004692	0.0004936	532	4 (0.75%)	TraesCS7D03G0250300;TraesCS7B03G0031800;TraesCS3A03G0331600;TraesCS7A03G0272100	1
GO:0048731	system development	0.001034	0.001085	658	4 (0.61%)	TraesCS7D03G0250300;TraesCS7B03G0031800;TraesCS3A03G0331600;TraesCS7A03G0272100	0
GO:0009628	response to abiotic stimulus	0.006094	0.006378	1079	4 (0.37%)	TraesCS7D03G0250300;TraesCS7B03G0031800;TraesCS3A03G0331600;TraesCS7A03G0272100	0
GO:0007275	multicellular organism development	0.006313	0.006605	1090	4 (0.37%)	TraesCS7D03G0250300;TraesCS7B03G0031800;TraesCS3A03G0331600;TraesCS7A03G0272100	0
GO:0048856	anatomical structure development	0.008915	0.009314	1205	4 (0.33%)	TraesCS7D03G0250300;TraesCS7B03G0031800;TraesCS3A03G0331600;TraesCS7A03G0272100	0
GO:0009909	regulation of flower development	6.038e-09	6.421e-09	94	5 (5.32%)	TraesCS7D03G0250300;TraesCS7B03G0031800;TraesCS3A03G0331600;TraesCS7A03G0272100;TraesCS2D03G0241000	0
GO:0048831	regulation of shoot system development	7.456e-09	7.927e-09	98	5 (5.1%)	TraesCS7D03G0250300;TraesCS7B03G0031800;TraesCS3A03G0331600;TraesCS7A03G0272100;TraesCS2D03G0241000	0
GO:2000026	regulation of multicellular organismal development	1.442e-07	1.533e-07	177	5 (2.82%)	TraesCS7D03G0250300;TraesCS7B03G0031800;TraesCS3A03G0331600;TraesCS7A03G0272100;TraesCS2D03G0241000	0
GO:0048580	regulation of post-embryonic development	1.442e-07	1.533e-07	177	5 (2.82%)	TraesCS7D03G0250300;TraesCS7B03G0031800;TraesCS3A03G0331600;TraesCS7A03G0272100;TraesCS2D03G0241000	0
GO:2000241	regulation of reproductive process	1.656e-07	1.76e-07	182	5 (2.75%)	TraesCS7D03G0250300;TraesCS7B03G0031800;TraesCS3A03G0331600;TraesCS7A03G0272100;TraesCS2D03G0241000	0
GO:0051239	regulation of multicellular organismal process	4.834e-07	5.135e-07	226	5 (2.21%)	TraesCS7D03G0250300;TraesCS7B03G0031800;TraesCS3A03G0331600;TraesCS7A03G0272100;TraesCS2D03G0241000	0
GO:0050793	regulation of developmental process	4.903e-06	5.202e-06	363	5 (1.38%)	TraesCS7D03G0250300;TraesCS7B03G0031800;TraesCS3A03G0331600;TraesCS7A03G0272100;TraesCS2D03G0241000	1

## Sheet: GO_P2020∩C11∩K00 
Gene Count:	2
Background Gene Count:	75477
Ontology:	E:\GOAnalyzer\Deployment\Data\gofiles\go-basic.obo
Annotation:	E:\GOAnalyzer\Deployment\data\gofiles\Gene-GO_association.wheat2022
Hierarchy:	All
Correction:	BH FDR p-value adjustment
Max Path Length From Leaf:	N/A
Min Path Length From Root:	3
GO ID	Description	P-Value	Corrected P-Value	Total Genes	Matched Gene Counts	Matched Genes
GO:0015035	protein-disulfide reductase activity	0.007485	0.007509	283	1 (0.35%)	TraesCS5D03G0251400
GO:0015036	disulfide oxidoreductase activity	0.007538	0.00756	285	1 (0.35%)	TraesCS5D03G0251400
GO:0045454	cell redox homeostasis	0.008382	0.008405	317	1 (0.32%)	TraesCS5D03G0251400
GO:0016667	oxidoreductase activity, acting on a sulfur group of donors	0.008857	0.00888	335	1 (0.3%)	TraesCS5D03G0251400
GO:0019725	cellular homeostasis	0.01	0.01	474	1 (0.21%)	TraesCS5D03G0251400
GO:0065008	regulation of biological quality	0.02	0.02	877	1 (0.11%)	TraesCS5D03G0251400
GO:0042592	homeostatic process	0.02	0.02	572	1 (0.17%)	TraesCS5D03G0251400
GO:0009055	electron transfer activity	0.02	0.02	945	1 (0.11%)	TraesCS5D03G0251400

## Sheet: WHGs_edges
fromNode	toNode	weight
PG(34:3)	TraesCS7B03G0888400	0.293235
TraesCS1B03G0752200	TraesCS7B03G0888400	0.346664	1	1
TraesCS1B03G0841700	TraesCS7B03G0888400	0.299939	1	1
TraesCS1B03G1066700	TraesCS7B03G0888400	0.302947	1	1
TraesCS1D03G0066300	TraesCS7B03G0888400	0.344084	1	1
TraesCS1D03G0421900	TraesCS7B03G0888400	0.333031	1	1
TraesCS2A03G0069900	TraesCS7B03G0888400	0.342077	1	1
TraesCS2A03G0862400	TraesCS7B03G0888400	0.328805	1	1
TraesCS2A03G0994800	TraesCS7B03G0888400	0.335272	1	1
TraesCS2A03G1086200	TraesCS7B03G0888400	0.294036	1	1
TraesCS2B03G0102400	TraesCS7B03G0888400	0.346792	1	1
TraesCS2B03G0488200	TraesCS7B03G0888400	0.346039	1	1
TraesCS2B03G0580500	TraesCS7B03G0888400	0.323289	1	1
TraesCS2D03G0347900	TraesCS7B03G0888400	0.31803	1	1
TraesCS2D03G0389100	TraesCS7B03G0888400	0.326116	1	1
TraesCS2D03G0826700	TraesCS7B03G0888400	0.342797	1	1
TraesCS2D03G1058400	TraesCS7B03G0888400	0.326729	1	1
TraesCS2D03G1214900	TraesCS7B03G0888400	0.330796	1	1
TraesCS3A03G0832100	TraesCS7B03G0888400	0.344161	1	1
TraesCS3A03G1036100	TraesCS7B03G0888400	0.350187	1	1
TraesCS3D03G0047400	TraesCS7B03G0888400	0.334684	1	1
TraesCS3D03G0964600	TraesCS7B03G0888400	0.348518	1	1
TraesCS4A03G0858900	TraesCS7B03G0888400	0.348678	1	1
TraesCS4B03G0828000	TraesCS7B03G0888400	0.332591	1	1
TraesCS4B03G0940000	TraesCS7B03G0888400	0.323304	1	1
TraesCS4D03G0668900	TraesCS7B03G0888400	0.299595	1	1
TraesCS4D03G0738600	TraesCS7B03G0888400	0.346031	1	1
TraesCS4D03G0748700	TraesCS7B03G0888400	0.347204	1	1
TraesCS5A03G0028100	TraesCS7B03G0888400	0.340683	1	1
TraesCS5A03G0532400	TraesCS7B03G0888400	0.348932	1	1
TraesCS5A03G0564900	TraesCS7B03G0888400	0.329813	1	1
TraesCS5A03G1073800	TraesCS7B03G0888400	0.338321	1	1
TraesCS5A03G1156200	TraesCS7B03G0888400	0.332559	1	1
TraesCS5B03G0571900	TraesCS7B03G0888400	0.335198	1	1
TraesCS5D03G1149600	TraesCS7B03G0888400	0.329353	1	1
TraesCS5D03G1149800	TraesCS7B03G0888400	0.348137	1	1
TraesCS6B03G0877600	TraesCS7B03G0888400	0.333179	1	1
TraesCS6D03G0772500	TraesCS7B03G0888400	0.330371	1	1
TraesCS7A03G0517200	TraesCS7B03G0888400	0.342809	1	1
TraesCS7D03G0087400	TraesCS7B03G0888400	0.306432	1	1
TraesCS7D03G0109900	TraesCS7B03G0888400	0.312614	1	1
TraesCS7D03G0446000	TraesCS7B03G0888400	0.33562	1	1
TraesCS7D03G0803900	TraesCS7B03G0888400	0.305036	1	1
TraesCS7B03G0198800	TraesCS7B03G0888400	0.336338	1	1
TraesCS1B03G1168700	TraesCS7B03G0888400	0.31458	1	1
TraesCS1B03G1168700	TraesCS1D03G0066300	0.339653	1	1
TraesCS1B03G1168700	TraesCS1D03G0421900	0.348559	1	1
TraesCS1B03G1168700	TraesCS2A03G0069900	0.338385	1	1
TraesCS1B03G1168700	TraesCS2A03G0994800	0.310514	1	1
TraesCS1B03G1168700	TraesCS2A03G1086200	0.362278	1	1
TraesCS1B03G1168700	TraesCS2B03G0102400	0.322805	1	1
TraesCS1B03G1168700	TraesCS2B03G0488200	0.308752	1	1
TraesCS1B03G1168700	TraesCS2B03G0580500	0.356021	1	1
TraesCS1B03G1168700	TraesCS2D03G0347900	0.357886	1	1
TraesCS1B03G1168700	TraesCS2D03G0826700	0.314514	1	1
TraesCS1B03G1168700	TraesCS3A03G0832100	0.348269	1	1
TraesCS1B03G1168700	TraesCS3A03G1036100	0.319471	1	1
TraesCS1B03G1168700	TraesCS3D03G0047400	0.310353	1	1
TraesCS1B03G1168700	TraesCS3D03G0964600	0.320417	1	1
TraesCS1B03G1168700	TraesCS4A03G0858900	0.324561	1	1
TraesCS1B03G1168700	TraesCS4B03G0828000	0.351067	1	1
TraesCS1B03G1168700	TraesCS4B03G0940000	0.356426	1	1
TraesCS1B03G1168700	TraesCS4D03G0668900	0.361603	1	1
TraesCS1B03G1168700	TraesCS4D03G0738600	0.333984	1	1
TraesCS1B03G1168700	TraesCS4D03G0748700	0.330427	1	1
TraesCS1B03G1168700	TraesCS5A03G0028100	0.315693	1	1
TraesCS1B03G1168700	TraesCS5A03G0532400	0.312659	1	1
TraesCS1B03G1168700	TraesCS5A03G0564900	0.360127	1	1
TraesCS1B03G1168700	TraesCS5A03G1073800	0.344416	1	1
TraesCS1B03G1168700	TraesCS5A03G1156200	0.351064	1	1
TraesCS1B03G1168700	TraesCS5B03G0571900	0.348661	1	1
TraesCS1B03G1168700	TraesCS5D03G1149800	0.309857	1	1
TraesCS1B03G1168700	TraesCS6B03G0877600	0.315405	1	1
TraesCS1B03G1168700	TraesCS7A03G0517200	0.346211	1	1
TraesCS1B03G1168700	TraesCS7D03G0087400	0.354409	1	1
TraesCS1B03G1168700	TraesCS7D03G0109900	0.342532	1	1
TraesCS1B03G1168700	TraesCS7D03G0446000	0.304837	1	1
TraesCS1B03G1168700	TraesCS7D03G0803900	0.358706	1	1
TraesCS1B03G1168700	TraesCS1B03G0752200	0.308263	1	1
TraesCS1B03G1168700	TraesCS1B03G0841700	0.361584	1	1
TraesCS1B03G1168700	TraesCS1B03G1066700	0.352074	1	1
TraesCS1B03G0752200	TraesCS1B03G1066700	0.289468	1	1
TraesCS1B03G0841700	TraesCS1B03G1066700	0.363885	1	1
TraesCS1B03G0752200	TraesCS1D03G0066300	0.327333	1	1
TraesCS1B03G0841700	TraesCS1D03G0066300	0.318072	1	1
TraesCS1B03G1066700	TraesCS1D03G0066300	0.327105	1	1
TraesCS1B03G0752200	TraesCS1D03G0421900	0.340326	1	1
TraesCS1B03G0841700	TraesCS1D03G0421900	0.357835	1	1
TraesCS1B03G0752200	TraesCS2A03G0069900	0.333113	1	1
TraesCS1B03G0841700	TraesCS2A03G0069900	0.313722	1	1
TraesCS1A03G0908000	TraesCS2A03G0862400	0.293924	1	1
TraesCS1B03G0752200	TraesCS2A03G0862400	0.310865	1	1
TraesCS1B03G0752200	TraesCS2A03G0994800	0.324139	1	1
TraesCS1B03G0841700	TraesCS2A03G1086200	0.34334	1	1
TraesCS1B03G0752200	TraesCS2B03G0102400	0.334188	1	1
TraesCS1B03G0841700	TraesCS2B03G0102400	0.290324	1	1
TraesCS1B03G0752200	TraesCS2B03G0488200	0.329732	1	1
TraesCS1B03G0752200	TraesCS2B03G0580500	0.320103	1	1
TraesCS1B03G0841700	TraesCS2B03G0580500	0.355872	1	1
TraesCS1B03G0752200	TraesCS2D03G0347900	0.318349	1	1
TraesCS1B03G0841700	TraesCS2D03G0347900	0.368522	1	1
TraesCS1B03G0752200	TraesCS2D03G0389100	0.326391	1	1
TraesCS1B03G0752200	TraesCS2D03G0826700	0.33865	1	1
TraesCS1B03G0752200	TraesCS2D03G1058400	0.329747	1	1
TraesCS1B03G0752200	TraesCS2D03G1214900	0.329028	1	1
TraesCS1B03G0752200	TraesCS3A03G0832100	0.350962	1	1
TraesCS1B03G0841700	TraesCS3A03G0832100	0.34737	1	1
TraesCS1B03G0752200	TraesCS3A03G1036100	0.330459	1	1
TraesCS1B03G0841700	TraesCS3A03G1036100	0.289521	1	1
TraesCS1B03G0752200	TraesCS3D03G0047400	0.342389	1	1
TraesCS1B03G0841700	TraesCS3D03G0047400	0.289331	1	1
TraesCS1B03G0752200	TraesCS3D03G0964600	0.335983	1	1
TraesCS1B03G0841700	TraesCS3D03G0964600	0.289054	1	1
TraesCS1B03G0752200	TraesCS4A03G0858900	0.337668	1	1
TraesCS1B03G0841700	TraesCS4A03G0858900	0.296731	1	1
TraesCS1B03G0752200	TraesCS4B03G0828000	0.330087	1	1
TraesCS1B03G0841700	TraesCS4B03G0828000	0.342109	1	1
TraesCS1B03G0752200	TraesCS4B03G0940000	0.316924	1	1
TraesCS1B03G0841700	TraesCS4B03G0940000	0.349541	1	1
TraesCS1B03G0841700	TraesCS4D03G0668900	0.340215	1	1
TraesCS1B03G0752200	TraesCS4D03G0738600	0.338178	1	1
TraesCS1B03G0841700	TraesCS4D03G0738600	0.312196	1	1
TraesCS1B03G0752200	TraesCS4D03G0748700	0.33097	1	1
TraesCS1B03G0841700	TraesCS4D03G0748700	0.307828	1	1
TraesCS1B03G0752200	TraesCS5A03G0028100	0.346017	1	1
TraesCS1B03G0841700	TraesCS5A03G0028100	0.298087	1	1
TraesCS1B03G0752200	TraesCS5A03G0532400	0.328388	1	1
TraesCS1B03G0752200	TraesCS5A03G0564900	0.330965	1	1
TraesCS1B03G0841700	TraesCS5A03G0564900	0.370954	1	1
TraesCS1B03G0752200	TraesCS5A03G1073800	0.339115	1	1
TraesCS1B03G0841700	TraesCS5A03G1073800	0.33738	1	1
TraesCS1B03G0752200	TraesCS5A03G1156200	0.330265	1	1
TraesCS1B03G0841700	TraesCS5A03G1156200	0.342388	1	1
TraesCS1B03G0752200	TraesCS5B03G0571900	0.343936	1	1
TraesCS1B03G0841700	TraesCS5B03G0571900	0.357599	1	1
TraesCS1A03G0908000	TraesCS5B03G0828400	0.291387	1	1
TraesCS1B03G0752200	TraesCS5D03G1149600	0.320226	1	1
TraesCS1B03G0752200	TraesCS5D03G1149800	0.327065	1	1
TraesCS1B03G0752200	TraesCS6B03G0877600	0.350737	1	1
TraesCS1B03G0841700	TraesCS6B03G0877600	0.30247	1	1
TraesCS1A03G0908000	TraesCS6D03G0772500	0.294387	1	1
TraesCS1B03G0752200	TraesCS6D03G0772500	0.311119	1	1
TraesCS1A03G0908000	TraesCS7A03G0380300	0.291331	1	1
TraesCS1B03G0752200	TraesCS7A03G0517200	0.350513	1	1
TraesCS1B03G0841700	TraesCS7A03G0517200	0.344363	1	1
TraesCS1A03G0908000	TraesCS7B03G0198800	0.292644	1	1
TraesCS1B03G0752200	TraesCS7B03G0198800	0.329363	1	1
TraesCS1B03G1066700	TraesCS1D03G0421900	0.342287	1	1
TraesCS1D03G0066300	TraesCS1D03G0421900	0.362203	1	1
TraesCS1B03G1066700	TraesCS2A03G0069900	0.326028	1	1
TraesCS1D03G0066300	TraesCS2A03G0069900	0.349166	1	1
TraesCS1D03G0421900	TraesCS2A03G0069900	0.357332	1	1
TraesCS2A03G0069900	TraesCS2A03G0862400	0.294195	1	1
TraesCS1B03G1066700	TraesCS2A03G0994800	0.292214	1	1
TraesCS1D03G0066300	TraesCS2A03G0994800	0.322475	1	1
TraesCS1D03G0421900	TraesCS2A03G0994800	0.33568	1	1
TraesCS2A03G0069900	TraesCS2A03G0994800	0.330527	1	1
TraesCS2A03G0862400	TraesCS2A03G0994800	0.304943	1	1
TraesCS1B03G1066700	TraesCS2A03G1086200	0.366647	1	1
TraesCS1D03G0066300	TraesCS2A03G1086200	0.306	1	1
TraesCS1D03G0421900	TraesCS2A03G1086200	0.356856	1	1
TraesCS2A03G0069900	TraesCS2A03G1086200	0.309213	1	1
TraesCS1B03G1066700	TraesCS2B03G0102400	0.306674	1	1
TraesCS1D03G0066300	TraesCS2B03G0102400	0.341506	1	1
TraesCS1D03G0421900	TraesCS2B03G0102400	0.348965	1	1
TraesCS2A03G0069900	TraesCS2B03G0102400	0.33516	1	1
TraesCS2A03G0862400	TraesCS2B03G0102400	0.307489	1	1
TraesCS2A03G0994800	TraesCS2B03G0102400	0.329328	1	1
TraesCS1D03G0066300	TraesCS2B03G0488200	0.319944	1	1
TraesCS1D03G0421900	TraesCS2B03G0488200	0.340374	1	1
TraesCS2A03G0069900	TraesCS2B03G0488200	0.336942	1	1
TraesCS2A03G0862400	TraesCS2B03G0488200	0.313431	1	1
TraesCS2A03G0994800	TraesCS2B03G0488200	0.326474	1	1
TraesCS2B03G0102400	TraesCS2B03G0488200	0.338153	1	1
TraesCS1B03G1066700	TraesCS2B03G0580500	0.350524	1	1
TraesCS1D03G0066300	TraesCS2B03G0580500	0.352343	1	1
TraesCS1D03G0421900	TraesCS2B03G0580500	0.359191	1	1
TraesCS2A03G0069900	TraesCS2B03G0580500	0.344982	1	1
TraesCS2A03G0994800	TraesCS2B03G0580500	0.315534	1	1
TraesCS2A03G1086200	TraesCS2B03G0580500	0.356566	1	1
TraesCS2B03G0102400	TraesCS2B03G0580500	0.331809	1	1
TraesCS2B03G0488200	TraesCS2B03G0580500	0.319794	1	1
TraesCS1B03G1066700	TraesCS2D03G0347900	0.354935	1	1
TraesCS1D03G0066300	TraesCS2D03G0347900	0.351448	1	1
TraesCS1D03G0421900	TraesCS2D03G0347900	0.354561	1	1
TraesCS2A03G0069900	TraesCS2D03G0347900	0.34702	1	1
TraesCS2A03G0994800	TraesCS2D03G0347900	0.316369	1	1
TraesCS2A03G1086200	TraesCS2D03G0347900	0.369837	1	1
TraesCS2B03G0102400	TraesCS2D03G0347900	0.33189	1	1
TraesCS2B03G0488200	TraesCS2D03G0347900	0.317236	1	1
TraesCS2B03G0580500	TraesCS2D03G0347900	0.360677	1	1
TraesCS1D03G0066300	TraesCS2D03G0389100	0.289395	1	1
TraesCS1D03G0421900	TraesCS2D03G0389100	0.294328	1	1
TraesCS2A03G0069900	TraesCS2D03G0389100	0.314779	1	1
TraesCS2A03G0862400	TraesCS2D03G0389100	0.32888	1	1
TraesCS2A03G0994800	TraesCS2D03G0389100	0.320084	1	1
TraesCS2B03G0102400	TraesCS2D03G0389100	0.326658	1	1
TraesCS2B03G0488200	TraesCS2D03G0389100	0.322871	1	1
TraesCS1B03G1066700	TraesCS2D03G0826700	0.297143	1	1
TraesCS1D03G0066300	TraesCS2D03G0826700	0.340434	1	1
TraesCS1D03G0421900	TraesCS2D03G0826700	0.34136	1	1
TraesCS2A03G0069900	TraesCS2D03G0826700	0.332273	1	1
TraesCS2A03G0862400	TraesCS2D03G0826700	0.31699	1	1
TraesCS2A03G0994800	TraesCS2D03G0826700	0.32737	1	1
TraesCS2B03G0102400	TraesCS2D03G0826700	0.336456	1	1
TraesCS2B03G0488200	TraesCS2D03G0826700	0.33998	1	1
TraesCS2B03G0580500	TraesCS2D03G0826700	0.321654	1	1
TraesCS2D03G0347900	TraesCS2D03G0826700	0.322526	1	1
TraesCS2D03G0389100	TraesCS2D03G0826700	0.330121	1	1
TraesCS1D03G0066300	TraesCS2D03G1058400	0.29252	1	1
TraesCS1D03G0421900	TraesCS2D03G1058400	0.292008	1	1
TraesCS2A03G0069900	TraesCS2D03G1058400	0.311178	1	1
TraesCS2A03G0862400	TraesCS2D03G1058400	0.330628	1	1
TraesCS2A03G0994800	TraesCS2D03G1058400	0.324809	1	1
TraesCS2B03G0102400	TraesCS2D03G1058400	0.326406	1	1
TraesCS2B03G0488200	TraesCS2D03G1058400	0.326733	1	1
TraesCS2D03G0826700	TraesCS2D03G1058400	0.334379	1	1
TraesCS1D03G0066300	TraesCS2D03G1214900	0.291087	1	1
TraesCS1D03G0421900	TraesCS2D03G1214900	0.305796	1	1
TraesCS2A03G0069900	TraesCS2D03G1214900	0.315499	1	1
TraesCS2A03G0862400	TraesCS2D03G1214900	0.322444	1	1
TraesCS2A03G0994800	TraesCS2D03G1214900	0.314583	1	1
TraesCS2B03G0102400	TraesCS2D03G1214900	0.32815	1	1
TraesCS2B03G0488200	TraesCS2D03G1214900	0.320661	1	1
TraesCS2D03G0389100	TraesCS2D03G1214900	0.316179	1	1
TraesCS2D03G0826700	TraesCS2D03G1214900	0.331606	1	1
TraesCS2D03G1058400	TraesCS2D03G1214900	0.330645	1	1
TraesCS1B03G1066700	TraesCS3A03G0832100	0.341918	1	1
TraesCS1D03G0066300	TraesCS3A03G0832100	0.366337	1	1
TraesCS1D03G0421900	TraesCS3A03G0832100	0.361016	1	1
TraesCS2A03G0069900	TraesCS3A03G0832100	0.357504	1	1
TraesCS2A03G0862400	TraesCS3A03G0832100	0.316585	1	1
TraesCS2A03G0994800	TraesCS3A03G0832100	0.349497	1	1
TraesCS2A03G1086200	TraesCS3A03G0832100	0.343746	1	1
TraesCS2B03G0102400	TraesCS3A03G0832100	0.355239	1	1
TraesCS2B03G0488200	TraesCS3A03G0832100	0.352051	1	1
TraesCS2B03G0580500	TraesCS3A03G0832100	0.359823	1	1
TraesCS2D03G0347900	TraesCS3A03G0832100	0.353761	1	1
TraesCS2D03G0389100	TraesCS3A03G0832100	0.318409	1	1
TraesCS2D03G0826700	TraesCS3A03G0832100	0.353358	1	1
TraesCS2D03G1058400	TraesCS3A03G0832100	0.312965	1	1
TraesCS2D03G1214900	TraesCS3A03G0832100	0.329015	1	1
TraesCS1B03G1066700	TraesCS3A03G1036100	0.302846	1	1
TraesCS1D03G0066300	TraesCS3A03G1036100	0.327858	1	1
TraesCS1D03G0421900	TraesCS3A03G1036100	0.34858	1	1
TraesCS2A03G0069900	TraesCS3A03G1036100	0.336586	1	1
TraesCS2A03G0862400	TraesCS3A03G1036100	0.303342	1	1
TraesCS2A03G0994800	TraesCS3A03G1036100	0.329406	1	1
TraesCS2B03G0102400	TraesCS3A03G1036100	0.338549	1	1
TraesCS2B03G0488200	TraesCS3A03G1036100	0.331692	1	1
TraesCS2B03G0580500	TraesCS3A03G1036100	0.3315	1	1
TraesCS2D03G0347900	TraesCS3A03G1036100	0.330056	1	1
TraesCS2D03G0389100	TraesCS3A03G1036100	0.321894	1	1
TraesCS2D03G0826700	TraesCS3A03G1036100	0.343627	1	1
TraesCS2D03G1058400	TraesCS3A03G1036100	0.324802	1	1
TraesCS2D03G1214900	TraesCS3A03G1036100	0.323154	1	1
TraesCS3A03G0832100	TraesCS3A03G1036100	0.355745	1	1
TraesCS1B03G1066700	TraesCS3D03G0047400	0.296728	1	1
TraesCS1D03G0066300	TraesCS3D03G0047400	0.338602	1	1
TraesCS1D03G0421900	TraesCS3D03G0047400	0.329696	1	1
TraesCS2A03G0069900	TraesCS3D03G0047400	0.33786	1	1
TraesCS2A03G0862400	TraesCS3D03G0047400	0.323472	1	1
TraesCS2A03G0994800	TraesCS3D03G0047400	0.332724	1	1
TraesCS2B03G0102400	TraesCS3D03G0047400	0.342575	1	1
TraesCS2B03G0488200	TraesCS3D03G0047400	0.343279	1	1
TraesCS2B03G0580500	TraesCS3D03G0047400	0.31433	1	1
TraesCS2D03G0347900	TraesCS3D03G0047400	0.315427	1	1
TraesCS2D03G0389100	TraesCS3D03G0047400	0.328718	1	1
TraesCS2D03G0826700	TraesCS3D03G0047400	0.339253	1	1
TraesCS2D03G1058400	TraesCS3D03G0047400	0.326668	1	1
TraesCS2D03G1214900	TraesCS3D03G0047400	0.326052	1	1
TraesCS3A03G0832100	TraesCS3D03G0047400	0.347221	1	1
TraesCS3A03G1036100	TraesCS3D03G0047400	0.345529	1	1
TraesCS1B03G1066700	TraesCS3D03G0964600	0.304929	1	1
TraesCS1D03G0066300	TraesCS3D03G0964600	0.339014	1	1
TraesCS1D03G0421900	TraesCS3D03G0964600	0.347565	1	1
TraesCS2A03G0069900	TraesCS3D03G0964600	0.332711	1	1
TraesCS2A03G0862400	TraesCS3D03G0964600	0.308277	1	1
TraesCS2A03G0994800	TraesCS3D03G0964600	0.329742	1	1
TraesCS2B03G0102400	TraesCS3D03G0964600	0.332134	1	1
TraesCS2B03G0488200	TraesCS3D03G0964600	0.339638	1	1
TraesCS2B03G0580500	TraesCS3D03G0964600	0.330341	1	1
TraesCS2D03G0347900	TraesCS3D03G0964600	0.330474	1	1
TraesCS2D03G0389100	TraesCS3D03G0964600	0.327624	1	1
TraesCS2D03G0826700	TraesCS3D03G0964600	0.338166	1	1
TraesCS2D03G1058400	TraesCS3D03G0964600	0.328353	1	1
TraesCS2D03G1214900	TraesCS3D03G0964600	0.330288	1	1
TraesCS3A03G0832100	TraesCS3D03G0964600	0.353605	1	1
TraesCS3A03G1036100	TraesCS3D03G0964600	0.336492	1	1
TraesCS3D03G0047400	TraesCS3D03G0964600	0.343755	1	1
TraesCS1B03G1066700	TraesCS4A03G0858900	0.310679	1	1
TraesCS1D03G0066300	TraesCS4A03G0858900	0.340593	1	1
TraesCS1D03G0421900	TraesCS4A03G0858900	0.351354	1	1
TraesCS2A03G0069900	TraesCS4A03G0858900	0.335968	1	1
TraesCS2A03G0862400	TraesCS4A03G0858900	0.301798	1	1
TraesCS2A03G0994800	TraesCS4A03G0858900	0.329395	1	1
TraesCS2B03G0102400	TraesCS4A03G0858900	0.335368	1	1
TraesCS2B03G0488200	TraesCS4A03G0858900	0.340468	1	1
TraesCS2B03G0580500	TraesCS4A03G0858900	0.335922	1	1
TraesCS2D03G0347900	TraesCS4A03G0858900	0.336122	1	1
TraesCS2D03G0389100	TraesCS4A03G0858900	0.32257	1	1
TraesCS2D03G0826700	TraesCS4A03G0858900	0.339358	1	1
TraesCS2D03G1058400	TraesCS4A03G0858900	0.325932	1	1
TraesCS2D03G1214900	TraesCS4A03G0858900	0.327755	1	1
TraesCS3A03G0832100	TraesCS4A03G0858900	0.357928	1	1
TraesCS3A03G1036100	TraesCS4A03G0858900	0.336188	1	1
TraesCS3D03G0047400	TraesCS4A03G0858900	0.342941	1	1
TraesCS3D03G0964600	TraesCS4A03G0858900	0.333385	1	1
TraesCS1B03G1066700	TraesCS4B03G0828000	0.341185	1	1
TraesCS1D03G0066300	TraesCS4B03G0828000	0.354277	1	1
TraesCS1D03G0421900	TraesCS4B03G0828000	0.360151	1	1
TraesCS2A03G0069900	TraesCS4B03G0828000	0.346099	1	1
TraesCS2A03G0994800	TraesCS4B03G0828000	0.323335	1	1
TraesCS2A03G1086200	TraesCS4B03G0828000	0.341276	1	1
TraesCS2B03G0102400	TraesCS4B03G0828000	0.337846	1	1
TraesCS2B03G0488200	TraesCS4B03G0828000	0.330704	1	1
TraesCS2B03G0580500	TraesCS4B03G0828000	0.351216	1	1
TraesCS2D03G0347900	TraesCS4B03G0828000	0.356632	1	1
TraesCS2D03G0826700	TraesCS4B03G0828000	0.328874	1	1
TraesCS2D03G1214900	TraesCS4B03G0828000	0.295748	1	1
TraesCS3A03G0832100	TraesCS4B03G0828000	0.364496	1	1
TraesCS3A03G1036100	TraesCS4B03G0828000	0.338857	1	1
TraesCS3D03G0047400	TraesCS4B03G0828000	0.324307	1	1
TraesCS3D03G0964600	TraesCS4B03G0828000	0.336382	1	1
TraesCS4A03G0858900	TraesCS4B03G0828000	0.340796	1	1
TraesCS1B03G1066700	TraesCS4B03G0940000	0.350946	1	1
TraesCS1D03G0066300	TraesCS4B03G0940000	0.349239	1	1
TraesCS1D03G0421900	TraesCS4B03G0940000	0.361302	1	1
TraesCS2A03G0069900	TraesCS4B03G0940000	0.340073	1	1
TraesCS2A03G0994800	TraesCS4B03G0940000	0.310254	1	1
TraesCS2A03G1086200	TraesCS4B03G0940000	0.350312	1	1
TraesCS2B03G0102400	TraesCS4B03G0940000	0.327534	1	1
TraesCS2B03G0488200	TraesCS4B03G0940000	0.316333	1	1
TraesCS2B03G0580500	TraesCS4B03G0940000	0.352787	1	1
TraesCS2D03G0347900	TraesCS4B03G0940000	0.362439	1	1
TraesCS2D03G0826700	TraesCS4B03G0940000	0.317334	1	1
TraesCS3A03G0832100	TraesCS4B03G0940000	0.360617	1	1
TraesCS3A03G1036100	TraesCS4B03G0940000	0.327805	1	1
TraesCS3D03G0047400	TraesCS4B03G0940000	0.313837	1	1
TraesCS3D03G0964600	TraesCS4B03G0940000	0.326205	1	1
TraesCS4A03G0858900	TraesCS4B03G0940000	0.332253	1	1
TraesCS4B03G0828000	TraesCS4B03G0940000	0.346976	1	1
TraesCS2D03G0746300	TraesCS4D03G0229100	0.293198	1	1
TraesCS1B03G1066700	TraesCS4D03G0668900	0.364706	1	1
TraesCS1D03G0066300	TraesCS4D03G0668900	0.316335	1	1
TraesCS1D03G0421900	TraesCS4D03G0668900	0.357458	1	1
TraesCS2A03G0069900	TraesCS4D03G0668900	0.31209	1	1
TraesCS2A03G1086200	TraesCS4D03G0668900	0.343248	1	1
TraesCS2B03G0580500	TraesCS4D03G0668900	0.355581	1	1
TraesCS2D03G0347900	TraesCS4D03G0668900	0.368797	1	1
TraesCS3A03G0832100	TraesCS4D03G0668900	0.346994	1	1
TraesCS4A03G0858900	TraesCS4D03G0668900	0.295166	1	1
TraesCS4B03G0828000	TraesCS4D03G0668900	0.341303	1	1
TraesCS4B03G0940000	TraesCS4D03G0668900	0.349273	1	1
TraesCS1B03G1066700	TraesCS4D03G0738600	0.324234	1	1
TraesCS1D03G0066300	TraesCS4D03G0738600	0.343672	1	1
TraesCS1D03G0421900	TraesCS4D03G0738600	0.356589	1	1
TraesCS2A03G0069900	TraesCS4D03G0738600	0.343147	1	1
TraesCS2A03G0994800	TraesCS4D03G0738600	0.330156	1	1
TraesCS2A03G1086200	TraesCS4D03G0738600	0.307765	1	1
TraesCS2B03G0102400	TraesCS4D03G0738600	0.338927	1	1
TraesCS2B03G0488200	TraesCS4D03G0738600	0.340626	1	1
TraesCS2B03G0580500	TraesCS4D03G0738600	0.345601	1	1
TraesCS2D03G0347900	TraesCS4D03G0738600	0.347057	1	1
TraesCS2D03G0389100	TraesCS4D03G0738600	0.313166	1	1
TraesCS2D03G0826700	TraesCS4D03G0738600	0.337753	1	1
TraesCS2D03G1058400	TraesCS4D03G0738600	0.315604	1	1
TraesCS2D03G1214900	TraesCS4D03G0738600	0.318386	1	1
TraesCS3A03G0832100	TraesCS4D03G0738600	0.365109	1	1
TraesCS3A03G1036100	TraesCS4D03G0738600	0.340906	1	1
TraesCS3D03G0047400	TraesCS4D03G0738600	0.339557	1	1
TraesCS3D03G0964600	TraesCS4D03G0738600	0.337366	1	1
TraesCS4A03G0858900	TraesCS4D03G0738600	0.3384	1	1
TraesCS4B03G0828000	TraesCS4D03G0738600	0.346536	1	1
TraesCS4B03G0940000	TraesCS4D03G0738600	0.34173	1	1
TraesCS4D03G0668900	TraesCS4D03G0738600	0.310686	1	1
TraesCS1B03G1066700	TraesCS4D03G0748700	0.319221	1	1
TraesCS1D03G0066300	TraesCS4D03G0748700	0.3324	1	1
TraesCS1D03G0421900	TraesCS4D03G0748700	0.354735	1	1
TraesCS2A03G0069900	TraesCS4D03G0748700	0.344625	1	1
TraesCS2A03G0994800	TraesCS4D03G0748700	0.327034	1	1
TraesCS2A03G1086200	TraesCS4D03G0748700	0.295472	1	1
TraesCS2B03G0102400	TraesCS4D03G0748700	0.340087	1	1
TraesCS2B03G0488200	TraesCS4D03G0748700	0.334185	1	1
TraesCS2B03G0580500	TraesCS4D03G0748700	0.342799	1	1
TraesCS2D03G0347900	TraesCS4D03G0748700	0.343211	1	1
TraesCS2D03G0389100	TraesCS4D03G0748700	0.312092	1	1
TraesCS2D03G0826700	TraesCS4D03G0748700	0.341064	1	1
TraesCS2D03G1058400	TraesCS4D03G0748700	0.314569	1	1
TraesCS2D03G1214900	TraesCS4D03G0748700	0.314563	1	1
TraesCS3A03G0832100	TraesCS4D03G0748700	0.364585	1	1
TraesCS3A03G1036100	TraesCS4D03G0748700	0.332838	1	1
TraesCS3D03G0047400	TraesCS4D03G0748700	0.341224	1	1
TraesCS3D03G0964600	TraesCS4D03G0748700	0.338074	1	1
TraesCS4A03G0858900	TraesCS4D03G0748700	0.337802	1	1
TraesCS4B03G0828000	TraesCS4D03G0748700	0.345281	1	1
TraesCS4B03G0940000	TraesCS4D03G0748700	0.3388	1	1
TraesCS4D03G0668900	TraesCS4D03G0748700	0.305995	1	1
TraesCS4D03G0738600	TraesCS4D03G0748700	0.337116	1	1
TraesCS1B03G1066700	TraesCS5A03G0028100	0.301635	1	1
TraesCS1D03G0066300	TraesCS5A03G0028100	0.349738	1	1
TraesCS1D03G0421900	TraesCS5A03G0028100	0.339933	1	1
TraesCS2A03G0069900	TraesCS5A03G0028100	0.341682	1	1
TraesCS2A03G0862400	TraesCS5A03G0028100	0.32505	1	1
TraesCS2A03G0994800	TraesCS5A03G0028100	0.337711	1	1
TraesCS2A03G1086200	TraesCS5A03G0028100	0.291886	1	1
TraesCS2B03G0102400	TraesCS5A03G0028100	0.345895	1	1
TraesCS2B03G0488200	TraesCS5A03G0028100	0.345887	1	1
TraesCS2B03G0580500	TraesCS5A03G0028100	0.321664	1	1
TraesCS2D03G0347900	TraesCS5A03G0028100	0.324243	1	1
TraesCS2D03G0389100	TraesCS5A03G0028100	0.331071	1	1
TraesCS2D03G0826700	TraesCS5A03G0028100	0.340089	1	1
TraesCS2D03G1058400	TraesCS5A03G0028100	0.333673	1	1
TraesCS2D03G1214900	TraesCS5A03G0028100	0.337039	1	1
TraesCS3A03G0832100	TraesCS5A03G0028100	0.351268	1	1
TraesCS3A03G1036100	TraesCS5A03G0028100	0.351995	1	1
TraesCS3D03G0047400	TraesCS5A03G0028100	0.335721	1	1
TraesCS3D03G0964600	TraesCS5A03G0028100	0.347627	1	1
TraesCS4A03G0858900	TraesCS5A03G0028100	0.349362	1	1
TraesCS4B03G0828000	TraesCS5A03G0028100	0.333674	1	1
TraesCS4B03G0940000	TraesCS5A03G0028100	0.322748	1	1
TraesCS4D03G0668900	TraesCS5A03G0028100	0.296958	1	1
TraesCS4D03G0738600	TraesCS5A03G0028100	0.34847	1	1
TraesCS4D03G0748700	TraesCS5A03G0028100	0.350833	1	1
TraesCS1B03G1066700	TraesCS5A03G0532400	0.294107	1	1
TraesCS1D03G0066300	TraesCS5A03G0532400	0.324186	1	1
TraesCS1D03G0421900	TraesCS5A03G0532400	0.343359	1	1
TraesCS2A03G0069900	TraesCS5A03G0532400	0.334712	1	1
TraesCS2A03G0862400	TraesCS5A03G0532400	0.309388	1	1
TraesCS2A03G0994800	TraesCS5A03G0532400	0.327411	1	1
TraesCS2B03G0102400	TraesCS5A03G0532400	0.334466	1	1
TraesCS2B03G0488200	TraesCS5A03G0532400	0.327462	1	1
TraesCS2B03G0580500	TraesCS5A03G0532400	0.32413	1	1
TraesCS2D03G0347900	TraesCS5A03G0532400	0.322217	1	1
TraesCS2D03G0389100	TraesCS5A03G0532400	0.323092	1	1
TraesCS2D03G0826700	TraesCS5A03G0532400	0.341523	1	1
TraesCS2D03G1058400	TraesCS5A03G0532400	0.325708	1	1
TraesCS2D03G1214900	TraesCS5A03G0532400	0.323938	1	1
TraesCS3A03G0832100	TraesCS5A03G0532400	0.352254	1	1
TraesCS3A03G1036100	TraesCS5A03G0532400	0.327402	1	1
TraesCS3D03G0047400	TraesCS5A03G0532400	0.344813	1	1
TraesCS3D03G0964600	TraesCS5A03G0532400	0.335675	1	1
TraesCS4A03G0858900	TraesCS5A03G0532400	0.337795	1	1
TraesCS4B03G0828000	TraesCS5A03G0532400	0.333293	1	1
TraesCS4B03G0940000	TraesCS5A03G0532400	0.320509	1	1
TraesCS4D03G0738600	TraesCS5A03G0532400	0.33965	1	1
TraesCS4D03G0748700	TraesCS5A03G0532400	0.332259	1	1
TraesCS5A03G0028100	TraesCS5A03G0532400	0.34941	1	1
TraesCS1B03G1066700	TraesCS5A03G0564900	0.359785	1	1
TraesCS1D03G0066300	TraesCS5A03G0564900	0.357128	1	1
TraesCS1D03G0421900	TraesCS5A03G0564900	0.35975	1	1
TraesCS2A03G0069900	TraesCS5A03G0564900	0.355544	1	1
TraesCS2A03G0994800	TraesCS5A03G0564900	0.330334	1	1
TraesCS2A03G1086200	TraesCS5A03G0564900	0.371073	1	1
TraesCS2B03G0102400	TraesCS5A03G0564900	0.343122	1	1
TraesCS2B03G0488200	TraesCS5A03G0564900	0.330554	1	1
TraesCS2B03G0580500	TraesCS5A03G0564900	0.367929	1	1
TraesCS2D03G0347900	TraesCS5A03G0564900	0.3643	1	1
TraesCS2D03G0826700	TraesCS5A03G0564900	0.335853	1	1
TraesCS2D03G1214900	TraesCS5A03G0564900	0.292313	1	1
TraesCS3A03G0832100	TraesCS5A03G0564900	0.353239	1	1
TraesCS3A03G1036100	TraesCS5A03G0564900	0.3407	1	1
TraesCS3D03G0047400	TraesCS5A03G0564900	0.330505	1	1
TraesCS3D03G0964600	TraesCS5A03G0564900	0.341556	1	1
TraesCS4A03G0858900	TraesCS5A03G0564900	0.345542	1	1
TraesCS4B03G0828000	TraesCS5A03G0564900	0.364689	1	1
TraesCS4B03G0940000	TraesCS5A03G0564900	0.369003	1	1
TraesCS4D03G0668900	TraesCS5A03G0564900	0.371152	1	1
TraesCS4D03G0738600	TraesCS5A03G0564900	0.353483	1	1
TraesCS4D03G0748700	TraesCS5A03G0564900	0.350305	1	1
TraesCS5A03G0028100	TraesCS5A03G0564900	0.337025	1	1
TraesCS5A03G0532400	TraesCS5A03G0564900	0.33439	1	1
TraesCS1B03G1066700	TraesCS5A03G1073800	0.335149	1	1
TraesCS1D03G0066300	TraesCS5A03G1073800	0.356028	1	1
TraesCS1D03G0421900	TraesCS5A03G1073800	0.356447	1	1
TraesCS2A03G0069900	TraesCS5A03G1073800	0.349365	1	1
TraesCS2A03G0994800	TraesCS5A03G1073800	0.332537	1	1
TraesCS2A03G1086200	TraesCS5A03G1073800	0.335354	1	1
TraesCS2B03G0102400	TraesCS5A03G1073800	0.34447	1	1
TraesCS2B03G0488200	TraesCS5A03G1073800	0.340477	1	1
TraesCS2B03G0580500	TraesCS5A03G1073800	0.34941	1	1
TraesCS2D03G0347900	TraesCS5A03G1073800	0.353686	1	1
TraesCS2D03G0389100	TraesCS5A03G1073800	0.301723	1	1
TraesCS2D03G0826700	TraesCS5A03G1073800	0.337221	1	1
TraesCS2D03G1058400	TraesCS5A03G1073800	0.302122	1	1
TraesCS2D03G1214900	TraesCS5A03G1073800	0.309655	1	1
TraesCS3A03G0832100	TraesCS5A03G1073800	0.365012	1	1
TraesCS3A03G1036100	TraesCS5A03G1073800	0.34564	1	1
TraesCS3D03G0047400	TraesCS5A03G1073800	0.330798	1	1
TraesCS3D03G0964600	TraesCS5A03G1073800	0.342932	1	1
TraesCS4A03G0858900	TraesCS5A03G1073800	0.345983	1	1
TraesCS4B03G0828000	TraesCS5A03G1073800	0.347066	1	1
TraesCS4B03G0940000	TraesCS5A03G1073800	0.345185	1	1
TraesCS4D03G0668900	TraesCS5A03G1073800	0.33631	1	1
TraesCS4D03G0738600	TraesCS5A03G1073800	0.348657	1	1
TraesCS4D03G0748700	TraesCS5A03G1073800	0.348367	1	1
TraesCS5A03G0028100	TraesCS5A03G1073800	0.339415	1	1
TraesCS5A03G0532400	TraesCS5A03G1073800	0.341613	1	1
TraesCS5A03G0564900	TraesCS5A03G1073800	0.358942	1	1
TraesCS1B03G1066700	TraesCS5A03G1156200	0.341202	1	1
TraesCS1D03G0066300	TraesCS5A03G1156200	0.354416	1	1
TraesCS1D03G0421900	TraesCS5A03G1156200	0.360102	1	1
TraesCS2A03G0069900	TraesCS5A03G1156200	0.346341	1	1
TraesCS2A03G0994800	TraesCS5A03G1156200	0.32363	1	1
TraesCS2A03G1086200	TraesCS5A03G1156200	0.341552	1	1
TraesCS2B03G0102400	TraesCS5A03G1156200	0.338053	1	1
TraesCS2B03G0488200	TraesCS5A03G1156200	0.330918	1	1
TraesCS2B03G0580500	TraesCS5A03G1156200	0.351156	1	1
TraesCS2D03G0347900	TraesCS5A03G1156200	0.356595	1	1
TraesCS2D03G0826700	TraesCS5A03G1156200	0.329108	1	1
TraesCS2D03G1214900	TraesCS5A03G1156200	0.295888	1	1
TraesCS3A03G0832100	TraesCS5A03G1156200	0.364462	1	1
TraesCS3A03G1036100	TraesCS5A03G1156200	0.339051	1	1
TraesCS3D03G0047400	TraesCS5A03G1156200	0.324294	1	1
TraesCS3D03G0964600	TraesCS5A03G1156200	0.33659	1	1
TraesCS4A03G0858900	TraesCS5A03G1156200	0.340975	1	1
TraesCS4B03G0828000	TraesCS5A03G1156200	0.344912	1	1
TraesCS4B03G0940000	TraesCS5A03G1156200	0.346893	1	1
TraesCS4D03G0668900	TraesCS5A03G1156200	0.34157	1	1
TraesCS4D03G0738600	TraesCS5A03G1156200	0.346757	1	1
TraesCS4D03G0748700	TraesCS5A03G1156200	0.345529	1	1
TraesCS5A03G0028100	TraesCS5A03G1156200	0.33362	1	1
TraesCS5A03G0532400	TraesCS5A03G1156200	0.333469	1	1
TraesCS5A03G0564900	TraesCS5A03G1156200	0.364685	1	1
TraesCS5A03G1073800	TraesCS5A03G1156200	0.347013	1	1
TraesCS1B03G1066700	TraesCS5B03G0571900	0.343461	1	1
TraesCS1D03G0066300	TraesCS5B03G0571900	0.362786	1	1
TraesCS1D03G0421900	TraesCS5B03G0571900	0.35495	1	1
TraesCS2A03G0069900	TraesCS5B03G0571900	0.359387	1	1
TraesCS2A03G0994800	TraesCS5B03G0571900	0.339818	1	1
TraesCS2A03G1086200	TraesCS5B03G0571900	0.356224	1	1
TraesCS2B03G0102400	TraesCS5B03G0571900	0.351851	1	1
TraesCS2B03G0488200	TraesCS5B03G0571900	0.344706	1	1
TraesCS2B03G0580500	TraesCS5B03G0571900	0.360489	1	1
TraesCS2D03G0347900	TraesCS5B03G0571900	0.353539	1	1
TraesCS2D03G0389100	TraesCS5B03G0571900	0.300868	1	1
TraesCS2D03G0826700	TraesCS5B03G0571900	0.345735	1	1
TraesCS2D03G1058400	TraesCS5B03G0571900	0.296447	1	1
TraesCS2D03G1214900	TraesCS5B03G0571900	0.311005	1	1
TraesCS3A03G0832100	TraesCS5B03G0571900	0.360819	1	1
TraesCS3A03G1036100	TraesCS5B03G0571900	0.351185	1	1
TraesCS3D03G0047400	TraesCS5B03G0571900	0.334562	1	1
TraesCS3D03G0964600	TraesCS5B03G0571900	0.350445	1	1
TraesCS4A03G0858900	TraesCS5B03G0571900	0.353326	1	1
TraesCS4B03G0828000	TraesCS5B03G0571900	0.361887	1	1
TraesCS4B03G0940000	TraesCS5B03G0571900	0.362301	1	1
TraesCS4D03G0668900	TraesCS5B03G0571900	0.357113	1	1
TraesCS4D03G0738600	TraesCS5B03G0571900	0.357662	1	1
TraesCS4D03G0748700	TraesCS5B03G0571900	0.356152	1	1
TraesCS5A03G0028100	TraesCS5B03G0571900	0.343511	1	1
TraesCS5A03G0532400	TraesCS5B03G0571900	0.346537	1	1
TraesCS5A03G0564900	TraesCS5B03G0571900	0.357769	1	1
TraesCS5A03G1073800	TraesCS5B03G0571900	0.358421	1	1
TraesCS5A03G1156200	TraesCS5B03G0571900	0.361871	1	1
TraesCS2A03G0862400	TraesCS5B03G0828400	0.311921	1	1
TraesCS2D03G1214900	TraesCS5B03G0828400	0.300104	1	1
TraesCS1D03G0421900	TraesCS5D03G1149600	0.293191	1	1
TraesCS2A03G0069900	TraesCS5D03G1149600	0.303315	1	1
TraesCS2A03G0862400	TraesCS5D03G1149600	0.310201	1	1
TraesCS2A03G0994800	TraesCS5D03G1149600	0.30629	1	1
TraesCS2B03G0102400	TraesCS5D03G1149600	0.318172	1	1
TraesCS2B03G0488200	TraesCS5D03G1149600	0.310437	1	1
TraesCS2D03G0389100	TraesCS5D03G1149600	0.316448	1	1
TraesCS2D03G0826700	TraesCS5D03G1149600	0.323533	1	1
TraesCS2D03G1058400	TraesCS5D03G1149600	0.332347	1	1
TraesCS2D03G1214900	TraesCS5D03G1149600	0.314808	1	1
TraesCS3A03G0832100	TraesCS5D03G1149600	0.32147	1	1
TraesCS3A03G1036100	TraesCS5D03G1149600	0.311698	1	1
TraesCS3D03G0047400	TraesCS5D03G1149600	0.321554	1	1
TraesCS3D03G0964600	TraesCS5D03G1149600	0.320071	1	1
TraesCS4A03G0858900	TraesCS5D03G1149600	0.317095	1	1
TraesCS4D03G0738600	TraesCS5D03G1149600	0.304242	1	1
TraesCS4D03G0748700	TraesCS5D03G1149600	0.299224	1	1
TraesCS5A03G0028100	TraesCS5D03G1149600	0.331322	1	1
TraesCS5A03G0532400	TraesCS5D03G1149600	0.314456	1	1
TraesCS5A03G1073800	TraesCS5D03G1149600	0.294636	1	1
TraesCS5B03G0571900	TraesCS5D03G1149600	0.2976	1	1
TraesCS5B03G0828400	TraesCS5D03G1149600	0.309362	1	1
TraesCS1B03G1066700	TraesCS5D03G1149800	0.290802	1	1
TraesCS1D03G0066300	TraesCS5D03G1149800	0.321098	1	1
TraesCS1D03G0421900	TraesCS5D03G1149800	0.340746	1	1
TraesCS2A03G0069900	TraesCS5D03G1149800	0.333784	1	1
TraesCS2A03G0862400	TraesCS5D03G1149800	0.311295	1	1
TraesCS2A03G0994800	TraesCS5D03G1149800	0.326893	1	1
TraesCS2B03G0102400	TraesCS5D03G1149800	0.33405	1	1
TraesCS2B03G0488200	TraesCS5D03G1149800	0.325128	1	1
TraesCS2B03G0580500	TraesCS5D03G1149800	0.320846	1	1
TraesCS2D03G0347900	TraesCS5D03G1149800	0.318901	1	1
TraesCS2D03G0389100	TraesCS5D03G1149800	0.323087	1	1
TraesCS2D03G0826700	TraesCS5D03G1149800	0.340378	1	1
TraesCS2D03G1058400	TraesCS5D03G1149800	0.32509	1	1
TraesCS2D03G1214900	TraesCS5D03G1149800	0.32313	1	1
TraesCS3A03G0832100	TraesCS5D03G1149800	0.351123	1	1
TraesCS3A03G1036100	TraesCS5D03G1149800	0.327341	1	1
TraesCS3D03G0047400	TraesCS5D03G1149800	0.344314	1	1
TraesCS3D03G0964600	TraesCS5D03G1149800	0.335652	1	1
TraesCS4A03G0858900	TraesCS5D03G1149800	0.337193	1	1
TraesCS4B03G0828000	TraesCS5D03G1149800	0.330468	1	1
TraesCS4B03G0940000	TraesCS5D03G1149800	0.317058	1	1
TraesCS4D03G0738600	TraesCS5D03G1149800	0.33817	1	1
TraesCS4D03G0748700	TraesCS5D03G1149800	0.331194	1	1
TraesCS5A03G0028100	TraesCS5D03G1149800	0.348128	1	1
TraesCS5A03G0532400	TraesCS5D03G1149800	0.322586	1	1
TraesCS5A03G0564900	TraesCS5D03G1149800	0.331649	1	1
TraesCS5A03G1073800	TraesCS5D03G1149800	0.339305	1	1
TraesCS5A03G1156200	TraesCS5D03G1149800	0.330652	1	1
TraesCS5B03G0571900	TraesCS5D03G1149800	0.344178	1	1
TraesCS5D03G1149600	TraesCS5D03G1149800	0.313983	1	1
TraesCS1B03G1066700	TraesCS6B03G0877600	0.302719	1	1
TraesCS1D03G0066300	TraesCS6B03G0877600	0.349091	1	1
TraesCS1D03G0421900	TraesCS6B03G0877600	0.33538	1	1
TraesCS2A03G0069900	TraesCS6B03G0877600	0.345742	1	1
TraesCS2A03G0862400	TraesCS6B03G0877600	0.330696	1	1
TraesCS2A03G0994800	TraesCS6B03G0877600	0.33886	1	1
TraesCS2A03G1086200	TraesCS6B03G0877600	0.296217	1	1
TraesCS2B03G0102400	TraesCS6B03G0877600	0.350294	1	1
TraesCS2B03G0488200	TraesCS6B03G0877600	0.350779	1	1
TraesCS2B03G0580500	TraesCS6B03G0877600	0.326079	1	1
TraesCS2D03G0347900	TraesCS6B03G0877600	0.319524	1	1
TraesCS2D03G0389100	TraesCS6B03G0877600	0.331735	1	1
TraesCS2D03G0826700	TraesCS6B03G0877600	0.345671	1	1
TraesCS2D03G1058400	TraesCS6B03G0877600	0.333186	1	1
TraesCS2D03G1214900	TraesCS6B03G0877600	0.336321	1	1
TraesCS3A03G0832100	TraesCS6B03G0877600	0.346744	1	1
TraesCS3A03G1036100	TraesCS6B03G0877600	0.354657	1	1
TraesCS3D03G0047400	TraesCS6B03G0877600	0.335928	1	1
TraesCS3D03G0964600	TraesCS6B03G0877600	0.352011	1	1
TraesCS4A03G0858900	TraesCS6B03G0877600	0.352501	1	1
TraesCS4B03G0828000	TraesCS6B03G0877600	0.336638	1	1
TraesCS4B03G0940000	TraesCS6B03G0877600	0.32658	1	1
TraesCS4D03G0668900	TraesCS6B03G0877600	0.301656	1	1
TraesCS4D03G0738600	TraesCS6B03G0877600	0.350722	1	1
TraesCS4D03G0748700	TraesCS6B03G0877600	0.352612	1	1
TraesCS5A03G0028100	TraesCS6B03G0877600	0.341921	1	1
TraesCS5A03G0532400	TraesCS6B03G0877600	0.352839	1	1
TraesCS5A03G0564900	TraesCS6B03G0877600	0.332636	1	1
TraesCS5A03G1073800	TraesCS6B03G0877600	0.342681	1	1
TraesCS5A03G1156200	TraesCS6B03G0877600	0.336643	1	1
TraesCS5B03G0571900	TraesCS6B03G0877600	0.337744	1	1
TraesCS5D03G1149600	TraesCS6B03G0877600	0.331913	1	1
TraesCS5D03G1149800	TraesCS6B03G0877600	0.351905	1	1
TraesCS2D03G0746300	TraesCS6D03G0772300	0.292488	1	1
TraesCS2A03G0069900	TraesCS6D03G0772500	0.294943	1	1
TraesCS2A03G0862400	TraesCS6D03G0772500	0.304147	1	1
TraesCS2A03G0994800	TraesCS6D03G0772500	0.30202	1	1
TraesCS2B03G0102400	TraesCS6D03G0772500	0.307173	1	1
TraesCS2B03G0488200	TraesCS6D03G0772500	0.313743	1	1
TraesCS2D03G0389100	TraesCS6D03G0772500	0.327673	1	1
TraesCS2D03G0826700	TraesCS6D03G0772500	0.317152	1	1
TraesCS2D03G1058400	TraesCS6D03G0772500	0.327093	1	1
TraesCS2D03G1214900	TraesCS6D03G0772500	0.320707	1	1
TraesCS3A03G0832100	TraesCS6D03G0772500	0.318855	1	1
TraesCS3A03G1036100	TraesCS6D03G0772500	0.304045	1	1
TraesCS3D03G0047400	TraesCS6D03G0772500	0.324697	1	1
TraesCS3D03G0964600	TraesCS6D03G0772500	0.308352	1	1
TraesCS4A03G0858900	TraesCS6D03G0772500	0.301926	1	1
TraesCS4D03G0738600	TraesCS6D03G0772500	0.289517	1	1
TraesCS5A03G0028100	TraesCS6D03G0772500	0.325398	1	1
TraesCS5A03G0532400	TraesCS6D03G0772500	0.309808	1	1
TraesCS5B03G0571900	TraesCS6D03G0772500	0.29231	1	1
TraesCS5B03G0828400	TraesCS6D03G0772500	0.3057	1	1
TraesCS5D03G1149600	TraesCS6D03G0772500	0.307776	1	1
TraesCS5D03G1149800	TraesCS6D03G0772500	0.311525	1	1
TraesCS6B03G0877600	TraesCS6D03G0772500	0.331605	1	1
TraesCS2A03G0862400	TraesCS7A03G0380300	0.309857	1	1
TraesCS2D03G1214900	TraesCS7A03G0380300	0.301289	1	1
TraesCS5D03G1149600	TraesCS7A03G0380300	0.308714	1	1
TraesCS6D03G0772500	TraesCS7A03G0380300	0.303532	1	1
TraesCS1B03G1066700	TraesCS7A03G0517200	0.339051	1	1
TraesCS1D03G0066300	TraesCS7A03G0517200	0.365409	1	1
TraesCS1D03G0421900	TraesCS7A03G0517200	0.359163	1	1
TraesCS2A03G0069900	TraesCS7A03G0517200	0.357177	1	1
TraesCS2A03G0862400	TraesCS7A03G0517200	0.317439	1	1
TraesCS2A03G0994800	TraesCS7A03G0517200	0.350002	1	1
TraesCS2A03G1086200	TraesCS7A03G0517200	0.340445	1	1
TraesCS2B03G0102400	TraesCS7A03G0517200	0.35443	1	1
TraesCS2B03G0488200	TraesCS7A03G0517200	0.352207	1	1
TraesCS2B03G0580500	TraesCS7A03G0517200	0.357604	1	1
TraesCS2D03G0347900	TraesCS7A03G0517200	0.35124	1	1
TraesCS2D03G0389100	TraesCS7A03G0517200	0.32078	1	1
TraesCS2D03G0826700	TraesCS7A03G0517200	0.353033	1	1
TraesCS2D03G1058400	TraesCS7A03G0517200	0.314479	1	1
TraesCS2D03G1214900	TraesCS7A03G0517200	0.329739	1	1
TraesCS3A03G0832100	TraesCS7A03G0517200	0.349422	1	1
TraesCS3A03G1036100	TraesCS7A03G0517200	0.35585	1	1
TraesCS3D03G0047400	TraesCS7A03G0517200	0.346421	1	1
TraesCS3D03G0964600	TraesCS7A03G0517200	0.353029	1	1
TraesCS4A03G0858900	TraesCS7A03G0517200	0.357472	1	1
TraesCS4B03G0828000	TraesCS7A03G0517200	0.362824	1	1
TraesCS4B03G0940000	TraesCS7A03G0517200	0.358231	1	1
TraesCS4D03G0668900	TraesCS7A03G0517200	0.343766	1	1
TraesCS4D03G0738600	TraesCS7A03G0517200	0.364405	1	1
TraesCS4D03G0748700	TraesCS7A03G0517200	0.36435	1	1
TraesCS5A03G0028100	TraesCS7A03G0517200	0.350248	1	1
TraesCS5A03G0532400	TraesCS7A03G0517200	0.35167	1	1
TraesCS5A03G0564900	TraesCS7A03G0517200	0.351109	1	1
TraesCS5A03G1073800	TraesCS7A03G0517200	0.36379	1	1
TraesCS5A03G1156200	TraesCS7A03G0517200	0.362815	1	1
TraesCS5B03G0571900	TraesCS7A03G0517200	0.359286	1	1
TraesCS5D03G1149600	TraesCS7A03G0517200	0.321299	1	1
TraesCS5D03G1149800	TraesCS7A03G0517200	0.350714	1	1
TraesCS6B03G0877600	TraesCS7A03G0517200	0.345871	1	1
TraesCS6D03G0772500	TraesCS7A03G0517200	0.319472	1	1
TraesCS1D03G0066300	TraesCS7B03G0198800	0.306913	1	1
TraesCS1D03G0421900	TraesCS7B03G0198800	0.309418	1	1
TraesCS2A03G0069900	TraesCS7B03G0198800	0.314846	1	1
TraesCS2A03G0862400	TraesCS7B03G0198800	0.314032	1	1
TraesCS2A03G0994800	TraesCS7B03G0198800	0.313465	1	1
TraesCS2B03G0102400	TraesCS7B03G0198800	0.324657	1	1
TraesCS2B03G0488200	TraesCS7B03G0198800	0.331167	1	1
TraesCS2D03G0389100	TraesCS7B03G0198800	0.33757	1	1
TraesCS2D03G0826700	TraesCS7B03G0198800	0.329839	1	1
TraesCS2D03G1058400	TraesCS7B03G0198800	0.345343	1	1
TraesCS2D03G1214900	TraesCS7B03G0198800	0.331057	1	1
TraesCS3A03G0832100	TraesCS7B03G0198800	0.334761	1	1
TraesCS3A03G1036100	TraesCS7B03G0198800	0.32581	1	1
TraesCS3D03G0047400	TraesCS7B03G0198800	0.328995	1	1
TraesCS3D03G0964600	TraesCS7B03G0198800	0.326211	1	1
TraesCS4A03G0858900	TraesCS7B03G0198800	0.323016	1	1
TraesCS4B03G0828000	TraesCS7B03G0198800	0.295943	1	1
TraesCS4D03G0738600	TraesCS7B03G0198800	0.314382	1	1
TraesCS4D03G0748700	TraesCS7B03G0198800	0.312151	1	1
TraesCS5A03G0028100	TraesCS7B03G0198800	0.337619	1	1
TraesCS5A03G0532400	TraesCS7B03G0198800	0.328991	1	1
TraesCS5A03G0564900	TraesCS7B03G0198800	0.30068	1	1
TraesCS5A03G1073800	TraesCS7B03G0198800	0.308785	1	1
TraesCS5A03G1156200	TraesCS7B03G0198800	0.296108	1	1
TraesCS5B03G0571900	TraesCS7B03G0198800	0.314987	1	1
TraesCS5B03G0828400	TraesCS7B03G0198800	0.309186	1	1
TraesCS5D03G1149600	TraesCS7B03G0198800	0.317387	1	1
TraesCS5D03G1149800	TraesCS7B03G0198800	0.329528	1	1
TraesCS6B03G0877600	TraesCS7B03G0198800	0.340196	1	1
TraesCS6D03G0772500	TraesCS7B03G0198800	0.311898	1	1
TraesCS7A03G0380300	TraesCS7B03G0198800	0.308435	1	1
TraesCS7A03G0517200	TraesCS7B03G0198800	0.335153	1	1
TraesCS1B03G0752200	TraesCS7D03G0087400	0.296908	1	1
TraesCS1B03G0841700	TraesCS7D03G0087400	0.365822	1	1
TraesCS1B03G1066700	TraesCS7D03G0087400	0.354917	1	1
TraesCS1D03G0066300	TraesCS7D03G0087400	0.335408	1	1
TraesCS1D03G0421900	TraesCS7D03G0087400	0.347648	1	1
TraesCS2A03G0069900	TraesCS7D03G0087400	0.331952	1	1
TraesCS2A03G0994800	TraesCS7D03G0087400	0.2974	1	1
TraesCS2A03G1086200	TraesCS7D03G0087400	0.368343	1	1
TraesCS2B03G0102400	TraesCS7D03G0087400	0.313067	1	1
TraesCS2B03G0488200	TraesCS7D03G0087400	0.295837	1	1
TraesCS2B03G0580500	TraesCS7D03G0087400	0.353255	1	1
TraesCS2D03G0347900	TraesCS7D03G0087400	0.357487	1	1
TraesCS2D03G0826700	TraesCS7D03G0087400	0.303248	1	1
TraesCS3A03G0832100	TraesCS7D03G0087400	0.346212	1	1
TraesCS3A03G1036100	TraesCS7D03G0087400	0.310071	1	1
TraesCS3D03G0047400	TraesCS7D03G0087400	0.299216	1	1
TraesCS3D03G0964600	TraesCS7D03G0087400	0.311306	1	1
TraesCS4A03G0858900	TraesCS7D03G0087400	0.317441	1	1
TraesCS4B03G0828000	TraesCS7D03G0087400	0.345624	1	1
TraesCS4B03G0940000	TraesCS7D03G0087400	0.354478	1	1
TraesCS4D03G0668900	TraesCS7D03G0087400	0.366355	1	1
TraesCS4D03G0738600	TraesCS7D03G0087400	0.330899	1	1
TraesCS4D03G0748700	TraesCS7D03G0087400	0.326086	1	1
TraesCS5A03G0028100	TraesCS7D03G0087400	0.306157	1	1
TraesCS5A03G0532400	TraesCS7D03G0087400	0.30128	1	1
TraesCS5A03G0564900	TraesCS7D03G0087400	0.363213	1	1
TraesCS5A03G1073800	TraesCS7D03G0087400	0.340826	1	1
TraesCS5A03G1156200	TraesCS7D03G0087400	0.345608	1	1
TraesCS5B03G0571900	TraesCS7D03G0087400	0.34879	1	1
TraesCS5D03G1149800	TraesCS7D03G0087400	0.29777	1	1
TraesCS6B03G0877600	TraesCS7D03G0087400	0.307421	1	1
TraesCS7A03G0517200	TraesCS7D03G0087400	0.343484	1	1
TraesCS1B03G0752200	TraesCS7D03G0109900	0.300415	1	1
TraesCS1B03G0752200	TraesCS7D03G0446000	0.348155	1	1
TraesCS1B03G0752200	TraesCS7D03G0803900	0.289917	1	1
TraesCS1B03G0841700	TraesCS7D03G0109900	0.340125	1	1
TraesCS1B03G0841700	TraesCS7D03G0803900	0.357502	1	1
TraesCS1B03G1066700	TraesCS7D03G0109900	0.3449	1	1
TraesCS1B03G1066700	TraesCS7D03G0446000	0.289898	1	1
TraesCS1B03G1066700	TraesCS7D03G0803900	0.360589	1	1
TraesCS1D03G0066300	TraesCS7D03G0109900	0.324366	1	1
TraesCS1D03G0066300	TraesCS7D03G0446000	0.341411	1	1
TraesCS1D03G0066300	TraesCS7D03G0803900	0.330694	1	1
TraesCS1D03G0421900	TraesCS7D03G0109900	0.338533	1	1
TraesCS1D03G0421900	TraesCS7D03G0446000	0.328739	1	1
TraesCS1D03G0421900	TraesCS7D03G0803900	0.353483	1	1
TraesCS2A03G0069900	TraesCS7D03G0109900	0.324634	1	1
TraesCS2A03G0069900	TraesCS7D03G0446000	0.338301	1	1
TraesCS2A03G0069900	TraesCS7D03G0803900	0.325047	1	1
TraesCS2A03G0862400	TraesCS7D03G0446000	0.328783	1	1
TraesCS2A03G0994800	TraesCS7D03G0109900	0.308494	1	1
TraesCS2A03G0994800	TraesCS7D03G0446000	0.335735	1	1
TraesCS2A03G1086200	TraesCS7D03G0109900	0.339002	1	1
TraesCS2A03G1086200	TraesCS7D03G0803900	0.360438	1	1
TraesCS2B03G0102400	TraesCS7D03G0109900	0.311933	1	1
TraesCS2B03G0102400	TraesCS7D03G0446000	0.345868	1	1
TraesCS2B03G0102400	TraesCS7D03G0803900	0.305944	1	1
TraesCS2B03G0488200	TraesCS7D03G0109900	0.301826	1	1
TraesCS2B03G0488200	TraesCS7D03G0446000	0.348377	1	1
TraesCS2B03G0580500	TraesCS7D03G0109900	0.341976	1	1
TraesCS2B03G0580500	TraesCS7D03G0446000	0.311401	1	1
TraesCS2B03G0580500	TraesCS7D03G0803900	0.349382	1	1
TraesCS2D03G0347900	TraesCS7D03G0109900	0.34347	1	1
TraesCS2D03G0347900	TraesCS7D03G0446000	0.311605	1	1
TraesCS2D03G0347900	TraesCS7D03G0803900	0.363673	1	1
TraesCS2D03G0389100	TraesCS7D03G0446000	0.33566	1	1
TraesCS2D03G0826700	TraesCS7D03G0109900	0.310611	1	1
TraesCS2D03G0826700	TraesCS7D03G0446000	0.341921	1	1
TraesCS2D03G0826700	TraesCS7D03G0803900	0.294851	1	1
TraesCS2D03G1058400	TraesCS7D03G0446000	0.339038	1	1
TraesCS2D03G1214900	TraesCS7D03G0446000	0.334519	1	1
TraesCS3A03G0832100	TraesCS7D03G0109900	0.333267	1	1
TraesCS3A03G0832100	TraesCS7D03G0446000	0.346568	1	1
TraesCS3A03G0832100	TraesCS7D03G0803900	0.348161	1	1
TraesCS3A03G1036100	TraesCS7D03G0109900	0.309615	1	1
TraesCS3A03G1036100	TraesCS7D03G0446000	0.350443	1	1
TraesCS3A03G1036100	TraesCS7D03G0803900	0.303962	1	1
TraesCS3D03G0047400	TraesCS7D03G0109900	0.316132	1	1
TraesCS3D03G0047400	TraesCS7D03G0446000	0.327041	1	1
TraesCS3D03G0047400	TraesCS7D03G0803900	0.294868	1	1
TraesCS3D03G0964600	TraesCS7D03G0109900	0.310845	1	1
TraesCS3D03G0964600	TraesCS7D03G0446000	0.347449	1	1
TraesCS3D03G0964600	TraesCS7D03G0803900	0.304549	1	1
TraesCS4A03G0858900	TraesCS7D03G0109900	0.31468	1	1
TraesCS4A03G0858900	TraesCS7D03G0446000	0.347062	1	1
TraesCS4A03G0858900	TraesCS7D03G0803900	0.311479	1	1
TraesCS4B03G0828000	TraesCS7D03G0109900	0.337153	1	1
TraesCS4B03G0828000	TraesCS7D03G0446000	0.323813	1	1
TraesCS4B03G0828000	TraesCS7D03G0803900	0.342022	1	1
TraesCS4B03G0940000	TraesCS7D03G0109900	0.339905	1	1
TraesCS4B03G0940000	TraesCS7D03G0446000	0.311789	1	1
TraesCS4B03G0940000	TraesCS7D03G0803900	0.347358	1	1
TraesCS4D03G0668900	TraesCS7D03G0109900	0.340574	1	1
TraesCS4D03G0668900	TraesCS7D03G0803900	0.357918	1	1
TraesCS4D03G0738600	TraesCS7D03G0109900	0.326013	1	1
TraesCS4D03G0738600	TraesCS7D03G0446000	0.342206	1	1
TraesCS4D03G0738600	TraesCS7D03G0803900	0.326114	1	1
TraesCS4D03G0748700	TraesCS7D03G0109900	0.323284	1	1
TraesCS4D03G0748700	TraesCS7D03G0446000	0.344589	1	1
TraesCS4D03G0748700	TraesCS7D03G0803900	0.321434	1	1
TraesCS5A03G0028100	TraesCS7D03G0109900	0.312416	1	1
TraesCS5A03G0028100	TraesCS7D03G0446000	0.33772	1	1
TraesCS5A03G0028100	TraesCS7D03G0803900	0.299989	1	1
TraesCS5A03G0532400	TraesCS7D03G0109900	0.302806	1	1
TraesCS5A03G0532400	TraesCS7D03G0446000	0.350184	1	1
TraesCS5A03G0532400	TraesCS7D03G0803900	0.294513	1	1
TraesCS5A03G0564900	TraesCS7D03G0109900	0.348433	1	1
TraesCS5A03G0564900	TraesCS7D03G0446000	0.326535	1	1
TraesCS5A03G0564900	TraesCS7D03G0803900	0.368281	1	1
TraesCS5A03G1073800	TraesCS7D03G0109900	0.334007	1	1
TraesCS5A03G1073800	TraesCS7D03G0446000	0.331251	1	1
TraesCS5A03G1073800	TraesCS7D03G0803900	0.336601	1	1
TraesCS5A03G1156200	TraesCS7D03G0109900	0.337255	1	1
TraesCS5A03G1156200	TraesCS7D03G0446000	0.323761	1	1
TraesCS5A03G1156200	TraesCS7D03G0803900	0.342006	1	1
TraesCS5B03G0571900	TraesCS7D03G0109900	0.338984	1	1
TraesCS5B03G0571900	TraesCS7D03G0446000	0.333108	1	1
TraesCS5B03G0571900	TraesCS7D03G0803900	0.354062	1	1
TraesCS5D03G1149600	TraesCS7D03G0446000	0.330999	1	1
TraesCS5D03G1149800	TraesCS7D03G0109900	0.30156	1	1
TraesCS5D03G1149800	TraesCS7D03G0446000	0.349694	1	1
TraesCS5D03G1149800	TraesCS7D03G0803900	0.290784	1	1
TraesCS6B03G0877600	TraesCS7D03G0109900	0.313103	1	1
TraesCS6B03G0877600	TraesCS7D03G0446000	0.337487	1	1
TraesCS6B03G0877600	TraesCS7D03G0803900	0.306512	1	1
TraesCS6D03G0772500	TraesCS7D03G0446000	0.328713	1	1
TraesCS7A03G0517200	TraesCS7D03G0109900	0.33108	1	1
TraesCS7A03G0517200	TraesCS7D03G0446000	0.345759	1	1
TraesCS7A03G0517200	TraesCS7D03G0803900	0.345236	1	1
TraesCS7B03G0198800	TraesCS7D03G0446000	0.335218	1	1
TraesCS7D03G0087400	TraesCS7D03G0109900	0.344555	1	1
TraesCS7D03G0087400	TraesCS7D03G0446000	0.293361	1	1
TraesCS7D03G0087400	TraesCS7D03G0803900	0.361156	1	1
TraesCS7D03G0109900	TraesCS7D03G0446000	0.308834	1	1
TraesCS7D03G0109900	TraesCS7D03G0803900	0.344292	1	1
TraesCS7D03G0446000	TraesCS7D03G0803900	0.289032	1	1

## Sheet: WHGs_nodes
nodeName	Alt_nodeName	Degree	Internal_Degree	Association Strength
PG(34:3)	PG(34:3)	98	1		entire net	subnet
TraesCS2A03G0069900	LOC123184339	523	44	average degree	452.712	33.5
TraesCS3A03G0832100	OsGELP26	766	44	Strength	0.0350939	0.644231
TraesCS5A03G0028100	LOC123101984	523	44
TraesCS6B03G0877600	LOC123137977	604	44
TraesCS7A03G0517200	OsEnS-122	753	44
TraesCS7B03G0888400	LOC123162191	613	45
TraesCS4A03G0858900	LOC606392	455	43
TraesCS4D03G0738600	TraesCS4D03G0738600	507	43
TraesCS5B03G0571900	LOC123112031	725	43
TraesCS1D03G0421900	LOC123181190	714	42
TraesCS2B03G0102400	LOC123040109	438	42
TraesCS3A03G1036100	LOC123059100	403	42
TraesCS3D03G0047400	TraesCS3D03G0047400	518	42
TraesCS3D03G0964600	LOC123075337	435	42
TraesCS4D03G0748700	DEFL8	441	42
TraesCS5A03G1073800	LOC123108113	612	42
TraesCS1B03G0752200	OsGSTU16	390	41
TraesCS1D03G0066300	OEP161	404	41
TraesCS2D03G0826700	LOC123049588	435	41
TraesCS5A03G0532400	MYB20	373	41
TraesCS5D03G1149800	LOC123126137	366	41
TraesCS7D03G0446000	LOC123167622	507	41
TraesCS2A03G0994800	OsERF#034	371	40
TraesCS2B03G0488200	GL7	363	39
TraesCS4B03G0828000	LOC123093546	624	39
TraesCS5A03G0564900	TraesCS5A03G0564900	785	39
TraesCS5A03G1156200	TraesCS5A03G1156200	626	39
TraesCS1B03G1168700	COR413-TM1	702	37
TraesCS2B03G0580500	LOC123041161	680	37
TraesCS2D03G0347900	LOC123052005	745	37
TraesCS4B03G0940000	LOC123089634	645	37
TraesCS7D03G0087400	LOC123166160	720	37
TraesCS7D03G0109900	LOC123168984	724	37
TraesCS1B03G1066700	LOC123097683	730	36
TraesCS7B03G0198800	LYP6	326	36
TraesCS2D03G1214900	LOC123050553	267	35
TraesCS7D03G0803900	OsLEA33	677	35
TraesCS5D03G1149600	LOC123123737	226	31
TraesCS1B03G0841700	LOC123094021	592	30
TraesCS2D03G0389100	DHFR	173	29
TraesCS2D03G1058400	CHL	180	29
TraesCS6D03G0772500	DHN3	238	29
TraesCS2A03G0862400	LOC123185659	230	27
TraesCS4D03G0668900	LOC123098555	590	26
TraesCS2A03G1086200	TraesCS2A03G1086200	562	25
TraesCS5B03G0828400	LOC123116687	54	6
TraesCS7A03G0380300	LOC123152142	50	6
TraesCS1A03G0908000	LOC123180622	32	5	average degree
TraesCS2D03G0746300	OsATL13	18	2
TraesCS4D03G0229100	TraesCS4D03G0229100	5	1
TraesCS6D03G0772300	LOC123145840	3	1

## Sheet: SHGs_edges
fromNode	toNode	weight
TraesCS1A03G0114500	TraesCS2B03G0727900	0.289862
TraesCS1A03G0114500	TraesCS3B03G0309700	0.292422
TraesCS1A03G0114500	TraesCS5D03G0047300	0.296612
TraesCS1A03G0205600	TraesCS2A03G1132800	0.293222
TraesCS2A03G1132800	TraesCS2D03G0725900	0.299186
TraesCS2A03G1132800	TraesCS3D03G0118500	0.293939
TraesCS2A03G1132800	TraesCS4B03G0673800	0.296079
TraesCS2A03G1132800	TraesCS4B03G0972000	0.298908
TraesCS2A03G1132800	TraesCS5B03G0598900	0.299154
TraesCS2A03G1132800	TraesCS5B03G1345500	0.290268
TraesCS2A03G1132800	TraesCS5D03G0104900	0.293337
TraesCS2A03G1132800	TraesCS5D03G0455000	0.296203
TraesCS2A03G1132800	TraesCS5D03G1127500	0.288918
TraesCS2A03G1132800	TraesCS7D03G1105900	0.29297
TraesCS2D03G0033000	TraesCS3B03G0309700	0.296885
TraesCS2D03G0033000	TraesCS4B03G0923500	0.289992
TraesCS2D03G0033000	TraesCS5D03G0047300	0.302936
TraesCS2D03G0045100	TraesCS3B03G0309700	0.30919
TraesCS2D03G0045100	TraesCS5B03G0715800	0.300473
TraesCS2D03G0045100	TraesCS5D03G0047300	0.309641
TraesCS2D03G0241000	TraesCS5D03G0047300	0.292197
TraesCS2D03G1013200	TraesCS3B03G0309700	0.289616
TraesCS2D03G1013200	TraesCS5D03G0047300	0.295134
TraesCS3A03G0331600	TraesCS3B03G0309700	0.306937
TraesCS3A03G0331600	TraesCS4B03G0923500	0.291345
TraesCS3A03G0331600	TraesCS5B03G0715800	0.29736
TraesCS3A03G0331600	TraesCS5D03G0047300	0.309898
TraesCS3A03G1159700	TraesCS2B03G0727900	0.293915
TraesCS3A03G1159700	TraesCS3B03G0309700	0.294236
TraesCS3A03G1159700	TraesCS5D03G0047300	0.298693
TraesCS3B03G0309700	TraesCS2B03G0727900	0.30314
TraesCS3B03G0309700	TraesCS3D03G0935000	0.304223
TraesCS3B03G0309700	TraesCS4B03G0923500	0.296451
TraesCS3B03G0309700	TraesCS5A03G1142000	0.293826
TraesCS3B03G0309700	TraesCS5B03G0715800	0.298572
TraesCS3B03G0309700	TraesCS5D03G0047300	0.299481
TraesCS3B03G0309700	TraesCS7D03G0003200	0.296855
TraesCS3D03G0935000	TraesCS5B03G0715800	0.295223
TraesCS3D03G0935000	TraesCS5D03G0047300	0.302002
TraesCS4B03G0923500	TraesCS2B03G0727900	0.297629
TraesCS4B03G0923500	TraesCS5D03G0047300	0.299427
TraesCS5B03G0715800	TraesCS2B03G0727900	0.293219
TraesCS5B03G0715800	TraesCS5D03G0047300	0.299473
TraesCS5D03G0047300	TraesCS2B03G0727900	0.309025
TraesCS5D03G0047300	TraesCS7D03G0003200	0.302118

## Sheet: SHGs_nodes
nodeName	Alt_nodeName	Degree	Internal_Degree	Association Strength
TraesCS3B03G0309700	OsWRKY107	467	13		entire net	subnet
TraesCS5D03G0047300	LOC123119139	468	13	average degree	312.704	3.33333
TraesCS2A03G1132800	LOC123186223	337	11	Strength	0.0242406	0.123457
TraesCS2B03G0727900	TraesCS2B03G0727900	369	6
TraesCS5B03G0715800	LOC123112502	384	6
TraesCS4B03G0923500	LOC123089582	384	5
TraesCS3A03G0331600	OsFTL1	368	4
TraesCS1A03G0114500	LOC123080620	411	3
TraesCS2D03G0033000	LOC123048195	412	3
TraesCS2D03G0045100	OsPKS14	348	3
TraesCS3A03G1159700	LOC123059434	424	3
TraesCS3D03G0935000	OsSPL2	369	3
TraesCS2D03G1013200	OsPUP13	342	2
TraesCS7D03G0003200	LOC542941	335	2
TraesCS1A03G0205600	TraesCS1A03G0205600	135	1
TraesCS2D03G0241000	LOC123048737	410	1
TraesCS2D03G0725900	LOC123049441	270	1
TraesCS3D03G0118500	TraesCS3D03G0118500	160	1
TraesCS4B03G0673800	TraesCS4B03G0673800	97	1
TraesCS4B03G0972000	LOC123089732	96	1
TraesCS5A03G1142000	LOC123105724	258	1
TraesCS5B03G0598900	LOC123112133	311	1
TraesCS5B03G1345500	LOC123117847	309	1
TraesCS5D03G0104900	LOC123119305	76	1
TraesCS5D03G0455000	LOC123124713	170	1
TraesCS5D03G1127500	LOC123126093	382	1
TraesCS7D03G1105900	LOC123166574	351	1
