# Supplementary material for: Computational genomics insights into cold acclimation in wheat
Source: Front Genet. 2022 Oct 20;13:1015673. doi: 10.3389/fgene.2022.1015673 (PMC9632429; doi:10.3389/fgene.2022.1015673)
Supplement: Supplementary file 4 [file Table6.XLSX]

## Sheet: VRN genes
Supplemental File S7 | The network property of the 214 genes in the immediate neighbourhood of three homoeologs of the VRN1 gene (VRN-A1, VRN-B1, VRN-D1).
Gene_ID
			KEGG Description	Tair10_Gene name
VRN1 and VRN3
TraesCS5A03G0935400	VRN-A1	this is the main vernalization gene	MADS-box transcription factor, plant	AP1
TraesCS5B03G0986000	VRN-B1		MADS-box transcription factor, plant	AP1
TraesCS5D03G0894800	VRN-D1		MADS-box transcription factor, plant	AP1
TraesCS7B03G0031800	VRN-B3		Flowering locus T	FT
VRN2 homologs:
TraesCS4B03G0958300	VRN-B2		transcription factor GHD7-like
TraesCS4D03G0834500	VRN-D2a		transcription factor GHD7-like
TraesCS4D03G0834600	VRN-D2b		transcription factor GHD7-like
TraesCS5A03G1265900	VRN-A2b		transcription factor GHD7-like

## Sheet: Vernalization_nodes
nodeName	ClusterMembership	Degree	subnet	Association Strength
TraesCS5B03G0986000	red	150	150		entire net	subnet
TraesCS5D03G0894800	red	139	139	average degree	673.774	180.359
TraesCS5A03G0935400	red	106	106	Strength	0.0531535	0.83115
TraesCS1B03G0341500	red	615	212
TraesCS1B03G0735800	red	819	209
TraesCS1B03G0859500	red	927	216
TraesCS1B03G1127300	brown	1035	197
TraesCS1D03G0167300	red	434	184
TraesCS1D03G0530600	red	857	213
TraesCS2A03G0723800	red	789	214
TraesCS2A03G0777700	red	916	215
TraesCS2A03G1165300	purple	489	166
TraesCS2B03G1040500	red	558	210
TraesCS2B03G1133600	red	665	214
TraesCS2B03G1411400	red	604	216
TraesCS2B03G1489900	brown	904	211
TraesCS2D03G0056900	purple	722	209
TraesCS2D03G0454600	red	963	216
TraesCS2D03G0906200	red	966	207
TraesCS2D03G1127500	red	935	216
TraesCS3A03G0016400	red	727	214
TraesCS3A03G0032300	brown	1114	212
TraesCS3A03G0997000	brown	1114	207
TraesCS3A03G1032900	red	1192	210
TraesCS3A03G1049400	red	919	215
TraesCS3A03G1122300	red	753	215
TraesCS3D03G0013700	red	666	214
TraesCS3D03G0606900	brown	1108	195
TraesCS3D03G0826300	red	609	206
TraesCS3D03G0873600	red	941	212
TraesCS3D03G0953100	red	867	214
TraesCS3D03G1045000	purple	462	158
TraesCS3D03G1153700	red	836	215
TraesCS4A03G0085000	red	1047	201
TraesCS4A03G0536600	red	501	195
TraesCS4A03G0683400	red	700	216
TraesCS4A03G1010300	red	911	216
TraesCS4B03G0722900	red	1024	216
TraesCS4B03G0799600	red	849	208
TraesCS4B03G0975700	red	847	214
TraesCS4D03G0222900	red	762	209
TraesCS4D03G0434100	red	908	216
TraesCS4D03G0718000	red	902	214
TraesCS5A03G0009300	red	711	213
TraesCS5A03G1289300	red	863	213
TraesCS5B03G0371300	purple	335	170
TraesCS5B03G0872400	red	615	213
TraesCS5B03G1136500	red	743	213
TraesCS5B03G1216200	red	1015	207
TraesCS5D03G0011500	red	844	202
TraesCS5D03G0011700	red	1047	216
TraesCS5D03G0460100	purple	710	209
TraesCS5D03G0528000	purple	753	195
TraesCS6B03G0366500	red	794	213
TraesCS6B03G0366600	red	530	174
TraesCS6D03G0690500	red	1005	214
TraesCS7A03G0769100	purple	814	213
TraesCS7B03G0222700	red	954	214
TraesCS7D03G0440800	red	656	203
TraesCS7D03G0548000	brown	1055	206
TraesCS7D03G1058600	red	950	216
TraesCS7D03G1073000	red	555	193
TraesCSU03G0103400	red	649	212
TraesCS1A03G0511000	red	508	181
TraesCS1A03G0685800	red	925	202
TraesCS1B03G0386500	purple	297	171
TraesCS1B03G1206000	green	788	185
TraesCS1B03G1216400	purple	446	131
TraesCS1D03G0989700	purple	534	183
TraesCS1D03G0990500	purple	324	156
TraesCS2A03G0019100	green	740	181
TraesCS2A03G0055900	red	848	196
TraesCS2A03G0078500	red	1125	215
TraesCS2B03G1436700	purple	604	151
TraesCS2B03G1464900	purple	609	165
TraesCS2D03G0049300	green	585	192
TraesCS2D03G0098100	red	347	186
TraesCS2D03G0176600	green	554	156
TraesCS2D03G0213200	purple	279	154
TraesCS2D03G0667000	brown	1137	198
TraesCS2D03G0798600	red	1054	215
TraesCS2D03G0859400	red	452	154
TraesCS2D03G1330100	red	477	190
TraesCS3A03G0940900	red	391	187
TraesCS3A03G1118700	red	938	215
TraesCS3B03G0017200	red	370	193
TraesCS3B03G0027700	red	518	202
TraesCS3B03G1071700	red	522	211
TraesCS3B03G1298900	red	1073	215
TraesCS3D03G0064900	red	365	168
TraesCS3D03G0216400	brown	924	175
TraesCS3D03G0308400	red	422	182
TraesCS3D03G0874000	brown	752	170
TraesCS3D03G1180800	red	511	211
TraesCS4A03G0110700	green	931	208
TraesCS4A03G0788400	brown	577	175
TraesCS4A03G0976800	red	359	185
TraesCS4A03G1139100	red	467	179
TraesCS4B03G0057900	red	276	178
TraesCS4B03G0261400	red	702	204
TraesCS4B03G0975200	red	536	175
TraesCS4D03G0436500	purple	634	148
TraesCS5A03G0236500	green	864	206
TraesCS5A03G0579100	red	213	126
TraesCS5B03G0112300	red	378	187
TraesCS5B03G0143700	red	955	215
TraesCS5B03G0735200	purple	665	166
TraesCS5D03G0009400	red	998	208
TraesCS5D03G0011800	red	1034	215
TraesCS5D03G0592100	red	448	180
TraesCS5D03G0738500	red	701	198
TraesCS5D03G0739200	red	929	215
TraesCS5D03G0839500	purple	390	150
TraesCS5D03G0974200	purple	679	191
TraesCS6B03G0405600	red	611	201
TraesCS6B03G1088100	red	1058	215
TraesCS6D03G0066600	green	947	190
TraesCS6D03G0666000	red	381	177
TraesCS7A03G1158100	red	440	176
TraesCS7D03G0120400	purple	334	141
TraesCS7D03G0736900	green	867	185
TraesCS7D03G0815900	red	1121	215
TraesCSU03G0017300	green	637	160
TraesCSU03G0241100	red	394	198
TraesCS1A03G0206000	brown	576	164
TraesCS1A03G0393100	lightyellow	598	205
TraesCS1B03G1192600	brown	885	165
TraesCS1D03G0596100	red	619	190
TraesCS1D03G0650100	purple	437	117
TraesCS1D03G0845800	red	904	191
TraesCS1D03G0860000	brown	828	170
TraesCS1D03G0990300	purple	454	148
TraesCS2A03G0055700	red	406	159
TraesCS2A03G0056200	purple	408	136
TraesCS2A03G0101400	red	502	168
TraesCS2A03G0101800	red	276	182
TraesCS2A03G0133500	purple	270	125
TraesCS2A03G0182300	purple	518	167
TraesCS2A03G0259400	red	938	212
TraesCS2A03G0279100	brown	504	154
TraesCS2A03G0298400	red	518	137
TraesCS2A03G1132800	red	337	144
TraesCS2A03G1356900	purple	675	174
TraesCS2B03G0030300	red	343	156
TraesCS2B03G0083000	brown	774	182
TraesCS2B03G0753300	red	734	184
TraesCS2B03G1132500	purple	469	165
TraesCS2D03G0041800	red	538	170
TraesCS2D03G0289300	purple	376	103
TraesCS2D03G0721200	brown	848	157
TraesCS2D03G0916400	red	410	153
TraesCS2D03G1206400	brown	596	152
TraesCS2D03G1234100	purple	409	160
TraesCS2D03G1306400	purple	400	134
TraesCS3A03G0007900	brown	1040	182
TraesCS3A03G0019800	brown	588	154
TraesCS3A03G0322800	red	525	159
TraesCS3A03G0663900	brown	942	160
TraesCS3A03G0941700	purple	302	124
TraesCS3A03G1251300	purple	529	135
TraesCS3B03G0027400	brown	523	146
TraesCS3B03G0345200	red	495	152
TraesCS3B03G0761500	green	656	157
TraesCS3B03G0904400	purple	179	106
TraesCS3B03G0973700	red	970	212
TraesCS3B03G1088600	purple	420	144
TraesCS3B03G1319000	brown	955	176
TraesCS3D03G0016800	brown	590	134
TraesCS3D03G0873700	brown	874	183
TraesCS3D03G0960800	brown	1101	195
TraesCS3D03G1072400	green	937	207
TraesCS4A03G0081500	brown	731	169
TraesCS4A03G0141900	red	213	154
TraesCS4A03G0280400	green	983	199
TraesCS4A03G0776600	purple	570	122
TraesCS4B03G0491700	purple	323	133
TraesCS4B03G0894400	red	1076	214
TraesCS4D03G0159700	red	391	151
TraesCS4D03G0192800	red	1020	200
TraesCS4D03G0585200	red	996	207
TraesCS5A03G0592700	brown	596	154
TraesCS5A03G0597200	purple	338	125
TraesCS5A03G0963300	brown	546	135
TraesCS5A03G1054300	brown	773	187
TraesCS5A03G1118600	purple	332	122
TraesCS5A03G1161000	brown	781	149
TraesCS5B03G0032700	red	992	200
TraesCS5B03G0641700	purple	423	157
TraesCS5B03G0812100	red	360	165
TraesCS5B03G0989700	brown	1003	169
TraesCS5B03G1265700	red	907	212
TraesCS5B03G1276400	lightyellow	813	211
TraesCS5D03G0011600	brown	917	156
TraesCS5D03G0151700	brown	993	172
TraesCS5D03G0152600	brown	600	143
TraesCS5D03G0556000	red	508	166
TraesCS5D03G0591500	purple	282	149
TraesCS5D03G0992800	brown	866	164
TraesCS6A03G0996000	purple	290	128
TraesCS6B03G0086800	brown	904	162
TraesCS6B03G0928600	purple	588	146
TraesCS6D03G0012800	purple	272	100
TraesCS6D03G0633900	brown	836	173
TraesCS7A03G0214300	green	941	197
TraesCS7A03G0353100	red	584	165
TraesCS7A03G0889900	green	618	155
TraesCS7B03G0193600	green	768	158
TraesCS7B03G0394000	red	390	158
TraesCS7B03G0598800	purple	513	130
TraesCS7B03G0714300	brown	1065	166
TraesCS7D03G0112900	red	240	170
TraesCS7D03G0130300	red	917	205
TraesCS7D03G0841700	red	487	148
TraesCS7D03G0910600	brown	1093	193
TraesCS7D03G1107900	red	443	136
TraesCSU03G0036600	red	524	167
TraesCSU03G0261200	red	332	167

## Sheet: Vernalization_edges
fromNode	toNode	weight
TraesCS5A03G0935400	TraesCS1A03G0511000	0.299833
TraesCS5A03G0935400	TraesCS1B03G0341500	0.310587
TraesCS5A03G0935400	TraesCS1B03G0735800	0.296859
TraesCS5A03G0935400	TraesCS1B03G0859500	0.298217
TraesCS5A03G0935400	TraesCS1B03G1127300	0.297122
TraesCS5A03G0935400	TraesCS1B03G1206000	0.308607
TraesCS5A03G0935400	TraesCS1B03G1216400	0.291795
TraesCS5A03G0935400	TraesCS1D03G0167300	0.292902
TraesCS5A03G0935400	TraesCS1D03G0530600	0.297651
TraesCS5A03G0935400	TraesCS1D03G0596100	0.298275
TraesCS5A03G0935400	TraesCS1D03G0989700	0.300105
TraesCS5A03G0935400	TraesCS2A03G0019100	0.306614
TraesCS5A03G0935400	TraesCS2A03G0078500	0.296457
TraesCS5A03G0935400	TraesCS2A03G0279100	0.289469
TraesCS5A03G0935400	TraesCS2A03G0723800	0.306893
TraesCS5A03G0935400	TraesCS2A03G0777700	0.310349
TraesCS5A03G0935400	TraesCS2A03G1165300	0.304268
TraesCS5A03G0935400	TraesCS2B03G0753300	0.302764
TraesCS5A03G0935400	TraesCS2B03G1040500	0.310544
TraesCS5A03G0935400	TraesCS2B03G1133600	0.29465
TraesCS5A03G0935400	TraesCS2B03G1411400	0.30728
TraesCS5A03G0935400	TraesCS2B03G1436700	0.29239
TraesCS5A03G0935400	TraesCS2B03G1464900	0.295672
TraesCS5A03G0935400	TraesCS2B03G1489900	0.304347
TraesCS5A03G0935400	TraesCS2D03G0049300	0.319744
TraesCS5A03G0935400	TraesCS2D03G0056900	0.298654
TraesCS5A03G0935400	TraesCS2D03G0176600	0.297004
TraesCS5A03G0935400	TraesCS2D03G0454600	0.331748
TraesCS5A03G0935400	TraesCS2D03G0667000	0.294797
TraesCS5A03G0935400	TraesCS2D03G0798600	0.306601
TraesCS5A03G0935400	TraesCS2D03G0906200	0.296462
TraesCS5A03G0935400	TraesCS2D03G0916400	0.29396
TraesCS5A03G0935400	TraesCS2D03G1127500	0.320834
TraesCS5A03G0935400	TraesCS2D03G1206400	0.293046
TraesCS5A03G0935400	TraesCS3A03G0016400	0.290384
TraesCS5A03G0935400	TraesCS3A03G0032300	0.29745
TraesCS5A03G0935400	TraesCS3A03G0997000	0.310102
TraesCS5A03G0935400	TraesCS3A03G1032900	0.300429
TraesCS5A03G0935400	TraesCS3A03G1049400	0.304278
TraesCS5A03G0935400	TraesCS3A03G1118700	0.29253
TraesCS5A03G0935400	TraesCS3A03G1122300	0.312903
TraesCS5A03G0935400	TraesCS3B03G0761500	0.306754
TraesCS5A03G0935400	TraesCS3B03G0973700	0.296135
TraesCS5A03G0935400	TraesCS3B03G1298900	0.297519
TraesCS5A03G0935400	TraesCS3D03G0013700	0.291451
TraesCS5A03G0935400	TraesCS3D03G0606900	0.297246
TraesCS5A03G0935400	TraesCS3D03G0826300	0.315745
TraesCS5A03G0935400	TraesCS3D03G0873600	0.302851
TraesCS5A03G0935400	TraesCS3D03G0953100	0.304801
TraesCS5A03G0935400	TraesCS3D03G1045000	0.302289
TraesCS5A03G0935400	TraesCS3D03G1072400	0.300421
TraesCS5A03G0935400	TraesCS3D03G1153700	0.296354
TraesCS5A03G0935400	TraesCS4A03G0085000	0.304117
TraesCS5A03G0935400	TraesCS4A03G0110700	0.289821
TraesCS5A03G0935400	TraesCS4A03G0280400	0.294537
TraesCS5A03G0935400	TraesCS4A03G0536600	0.304009
TraesCS5A03G0935400	TraesCS4A03G0683400	0.307473
TraesCS5A03G0935400	TraesCS4A03G1010300	0.322742
TraesCS5A03G0935400	TraesCS4B03G0261400	0.310097
TraesCS5A03G0935400	TraesCS4B03G0722900	0.324641
TraesCS5A03G0935400	TraesCS4B03G0799600	0.321938
TraesCS5A03G0935400	TraesCS4B03G0975700	0.295476
TraesCS5A03G0935400	TraesCS4D03G0222900	0.307525
TraesCS5A03G0935400	TraesCS4D03G0434100	0.329255
TraesCS5A03G0935400	TraesCS4D03G0436500	0.29282
TraesCS5A03G0935400	TraesCS4D03G0585200	0.296612
TraesCS5A03G0935400	TraesCS4D03G0718000	0.311179
TraesCS5A03G0935400	TraesCS5A03G0009300	0.307757
TraesCS5A03G0935400	TraesCS5A03G0236500	0.318179
TraesCS5A03G0935400	TraesCS5A03G1289300	0.293563
TraesCS5A03G0935400	TraesCS5B03G0143700	0.297759
TraesCS5A03G0935400	TraesCS5B03G0371300	0.2929
TraesCS5A03G0935400	TraesCS5B03G0735200	0.297501
TraesCS5A03G0935400	TraesCS5B03G0872400	0.294771
TraesCS5A03G0935400	TraesCS5B03G1136500	0.318989
TraesCS5A03G0935400	TraesCS5B03G1216200	0.30872
TraesCS5A03G0935400	TraesCS5D03G0009400	0.293855
TraesCS5A03G0935400	TraesCS5D03G0011500	0.29587
TraesCS5A03G0935400	TraesCS5D03G0011700	0.306155
TraesCS5A03G0935400	TraesCS5D03G0011800	0.299493
TraesCS5A03G0935400	TraesCS5D03G0460100	0.295029
TraesCS5A03G0935400	TraesCS5D03G0528000	0.310315
TraesCS5A03G0935400	TraesCS5D03G0739200	0.296194
TraesCS5A03G0935400	TraesCS5D03G0974200	0.295672
TraesCS5A03G0935400	TraesCS6B03G0366500	0.301685
TraesCS5A03G0935400	TraesCS6B03G0366600	0.290023
TraesCS5A03G0935400	TraesCS6B03G0405600	0.289312
TraesCS5A03G0935400	TraesCS6B03G0928600	0.293067
TraesCS5A03G0935400	TraesCS6B03G1088100	0.300395
TraesCS5A03G0935400	TraesCS6D03G0066600	0.298856
TraesCS5A03G0935400	TraesCS6D03G0690500	0.302194
TraesCS5A03G0935400	TraesCS7A03G0769100	0.298972
TraesCS5A03G0935400	TraesCS7A03G0889900	0.296707
TraesCS5A03G0935400	TraesCS7B03G0193600	0.290799
TraesCS5A03G0935400	TraesCS7B03G0222700	0.301005
TraesCS5A03G0935400	TraesCS7D03G0130300	0.289162
TraesCS5A03G0935400	TraesCS7D03G0440800	0.294726
TraesCS5A03G0935400	TraesCS7D03G0548000	0.293939
TraesCS5A03G0935400	TraesCS7D03G0736900	0.301963
TraesCS5A03G0935400	TraesCS7D03G0815900	0.28967
TraesCS5A03G0935400	TraesCS7D03G0910600	0.294536
TraesCS5A03G0935400	TraesCS7D03G1058600	0.314263
TraesCS5A03G0935400	TraesCS7D03G1073000	0.309421
TraesCS5A03G0935400	TraesCS7D03G1107900	0.296072
TraesCS5A03G0935400	TraesCSU03G0017300	0.300669
TraesCS5A03G0935400	TraesCSU03G0103400	0.293953
TraesCS5B03G0986000	TraesCS1A03G0393100	0.289734
TraesCS5B03G0986000	TraesCS1A03G0685800	0.29797
TraesCS5B03G0986000	TraesCS1B03G0341500	0.323939
TraesCS5B03G0986000	TraesCS1B03G0386500	0.302879
TraesCS5B03G0986000	TraesCS1B03G0735800	0.306238
TraesCS5B03G0986000	TraesCS1B03G0859500	0.308032
TraesCS5B03G0986000	TraesCS1B03G1127300	0.298245
TraesCS5B03G0986000	TraesCS1B03G1206000	0.305281
TraesCS5B03G0986000	TraesCS1B03G1216400	0.295605
TraesCS5B03G0986000	TraesCS1D03G0167300	0.312423
TraesCS5B03G0986000	TraesCS1D03G0530600	0.310675
TraesCS5B03G0986000	TraesCS1D03G0650100	0.294355
TraesCS5B03G0986000	TraesCS1D03G0989700	0.308083
TraesCS5B03G0986000	TraesCS1D03G0990300	0.304722
TraesCS5B03G0986000	TraesCS1D03G0990500	0.309848
TraesCS5B03G0986000	TraesCS2A03G0019100	0.298227
TraesCS5B03G0986000	TraesCS2A03G0055900	0.291845
TraesCS5B03G0986000	TraesCS2A03G0056200	0.291377
TraesCS5B03G0986000	TraesCS2A03G0078500	0.289652
TraesCS5B03G0986000	TraesCS2A03G0133500	0.28962
TraesCS5B03G0986000	TraesCS2A03G0182300	0.308757
TraesCS5B03G0986000	TraesCS2A03G0259400	0.289256
TraesCS5B03G0986000	TraesCS2A03G0723800	0.301277
TraesCS5B03G0986000	TraesCS2A03G0777700	0.315676
TraesCS5B03G0986000	TraesCS2A03G1165300	0.301209
TraesCS5B03G0986000	TraesCS2A03G1356900	0.301082
TraesCS5B03G0986000	TraesCS2B03G1040500	0.310376
TraesCS5B03G0986000	TraesCS2B03G1132500	0.295534
TraesCS5B03G0986000	TraesCS2B03G1133600	0.308726
TraesCS5B03G0986000	TraesCS2B03G1411400	0.320679
TraesCS5B03G0986000	TraesCS2B03G1436700	0.293231
TraesCS5B03G0986000	TraesCS2B03G1464900	0.298746
TraesCS5B03G0986000	TraesCS2B03G1489900	0.309193
TraesCS5B03G0986000	TraesCS2D03G0049300	0.289621
TraesCS5B03G0986000	TraesCS2D03G0056900	0.30529
TraesCS5B03G0986000	TraesCS2D03G0098100	0.296231
TraesCS5B03G0986000	TraesCS2D03G0176600	0.293473
TraesCS5B03G0986000	TraesCS2D03G0213200	0.303005
TraesCS5B03G0986000	TraesCS2D03G0289300	0.289127
TraesCS5B03G0986000	TraesCS2D03G0454600	0.318681
TraesCS5B03G0986000	TraesCS2D03G0798600	0.299556
TraesCS5B03G0986000	TraesCS2D03G0859400	0.292832
TraesCS5B03G0986000	TraesCS2D03G0906200	0.307682
TraesCS5B03G0986000	TraesCS2D03G1127500	0.319145
TraesCS5B03G0986000	TraesCS2D03G1234100	0.303534
TraesCS5B03G0986000	TraesCS2D03G1306400	0.292279
TraesCS5B03G0986000	TraesCS2D03G1330100	0.301192
TraesCS5B03G0986000	TraesCS3A03G0016400	0.299534
TraesCS5B03G0986000	TraesCS3A03G0032300	0.3012
TraesCS5B03G0986000	TraesCS3A03G0940900	0.295543
TraesCS5B03G0986000	TraesCS3A03G0941700	0.299709
TraesCS5B03G0986000	TraesCS3A03G0997000	0.293788
TraesCS5B03G0986000	TraesCS3A03G1032900	0.293147
TraesCS5B03G0986000	TraesCS3A03G1049400	0.308735
TraesCS5B03G0986000	TraesCS3A03G1118700	0.294516
TraesCS5B03G0986000	TraesCS3A03G1122300	0.325744
TraesCS5B03G0986000	TraesCS3A03G1251300	0.29325
TraesCS5B03G0986000	TraesCS3B03G0017200	0.304009
TraesCS5B03G0986000	TraesCS3B03G0027700	0.312313
TraesCS5B03G0986000	TraesCS3B03G0904400	0.297064
TraesCS5B03G0986000	TraesCS3B03G1071700	0.30886
TraesCS5B03G0986000	TraesCS3B03G1088600	0.302053
TraesCS5B03G0986000	TraesCS3B03G1298900	0.298318
TraesCS5B03G0986000	TraesCS3D03G0013700	0.303267
TraesCS5B03G0986000	TraesCS3D03G0064900	0.301569
TraesCS5B03G0986000	TraesCS3D03G0216400	0.290372
TraesCS5B03G0986000	TraesCS3D03G0308400	0.313202
TraesCS5B03G0986000	TraesCS3D03G0606900	0.289625
TraesCS5B03G0986000	TraesCS3D03G0826300	0.295281
TraesCS5B03G0986000	TraesCS3D03G0873600	0.313273
TraesCS5B03G0986000	TraesCS3D03G0874000	0.291731
TraesCS5B03G0986000	TraesCS3D03G0953100	0.309267
TraesCS5B03G0986000	TraesCS3D03G1045000	0.313858
TraesCS5B03G0986000	TraesCS3D03G1153700	0.302363
TraesCS5B03G0986000	TraesCS3D03G1180800	0.30468
TraesCS5B03G0986000	TraesCS4A03G0085000	0.304812
TraesCS5B03G0986000	TraesCS4A03G0110700	0.294966
TraesCS5B03G0986000	TraesCS4A03G0536600	0.296363
TraesCS5B03G0986000	TraesCS4A03G0683400	0.321442
TraesCS5B03G0986000	TraesCS4A03G0776600	0.289093
TraesCS5B03G0986000	TraesCS4A03G0788400	0.292626
TraesCS5B03G0986000	TraesCS4A03G0976800	0.289974
TraesCS5B03G0986000	TraesCS4A03G1010300	0.321947
TraesCS5B03G0986000	TraesCS4A03G1139100	0.290868
TraesCS5B03G0986000	TraesCS4B03G0057900	0.293168
TraesCS5B03G0986000	TraesCS4B03G0261400	0.29429
TraesCS5B03G0986000	TraesCS4B03G0491700	0.301636
TraesCS5B03G0986000	TraesCS4B03G0722900	0.310579
TraesCS5B03G0986000	TraesCS4B03G0799600	0.308963
TraesCS5B03G0986000	TraesCS4B03G0894400	0.295851
TraesCS5B03G0986000	TraesCS4B03G0975200	0.289467
TraesCS5B03G0986000	TraesCS4B03G0975700	0.304652
TraesCS5B03G0986000	TraesCS4D03G0192800	0.291801
TraesCS5B03G0986000	TraesCS4D03G0222900	0.311457
TraesCS5B03G0986000	TraesCS4D03G0434100	0.313323
TraesCS5B03G0986000	TraesCS4D03G0436500	0.298371
TraesCS5B03G0986000	TraesCS4D03G0718000	0.310866
TraesCS5B03G0986000	TraesCS5A03G0009300	0.318949
TraesCS5B03G0986000	TraesCS5A03G0236500	0.306085
TraesCS5B03G0986000	TraesCS5A03G0579100	0.290102
TraesCS5B03G0986000	TraesCS5A03G0597200	0.298787
TraesCS5B03G0986000	TraesCS5A03G1118600	0.292349
TraesCS5B03G0986000	TraesCS5A03G1289300	0.296502
TraesCS5B03G0986000	TraesCS5B03G0112300	0.30546
TraesCS5B03G0986000	TraesCS5B03G0143700	0.306981
TraesCS5B03G0986000	TraesCS5B03G0371300	0.304421
TraesCS5B03G0986000	TraesCS5B03G0641700	0.298692
TraesCS5B03G0986000	TraesCS5B03G0735200	0.310309
TraesCS5B03G0986000	TraesCS5B03G0872400	0.313705
TraesCS5B03G0986000	TraesCS5B03G1136500	0.323286
TraesCS5B03G0986000	TraesCS5B03G1216200	0.305378
TraesCS5B03G0986000	TraesCS5B03G1265700	0.289283
TraesCS5B03G0986000	TraesCS5B03G1276400	0.299104
TraesCS5B03G0986000	TraesCS5D03G0009400	0.292187
TraesCS5B03G0986000	TraesCS5D03G0011500	0.30011
TraesCS5B03G0986000	TraesCS5D03G0011700	0.307407
TraesCS5B03G0986000	TraesCS5D03G0011800	0.291628
TraesCS5B03G0986000	TraesCS5D03G0460100	0.307071
TraesCS5B03G0986000	TraesCS5D03G0528000	0.313095
TraesCS5B03G0986000	TraesCS5D03G0591500	0.292817
TraesCS5B03G0986000	TraesCS5D03G0592100	0.291915
TraesCS5B03G0986000	TraesCS5D03G0738500	0.304444
TraesCS5B03G0986000	TraesCS5D03G0739200	0.306276
TraesCS5B03G0986000	TraesCS5D03G0839500	0.302341
TraesCS5B03G0986000	TraesCS5D03G0974200	0.308594
TraesCS5B03G0986000	TraesCS6A03G0996000	0.289165
TraesCS5B03G0986000	TraesCS6B03G0366500	0.302096
TraesCS5B03G0986000	TraesCS6B03G0366600	0.301754
TraesCS5B03G0986000	TraesCS6B03G0405600	0.300496
TraesCS5B03G0986000	TraesCS6B03G1088100	0.302498
TraesCS5B03G0986000	TraesCS6D03G0012800	0.288996
TraesCS5B03G0986000	TraesCS6D03G0066600	0.292578
TraesCS5B03G0986000	TraesCS6D03G0666000	0.290217
TraesCS5B03G0986000	TraesCS6D03G0690500	0.304033
TraesCS5B03G0986000	TraesCS7A03G0214300	0.290714
TraesCS5B03G0986000	TraesCS7A03G0353100	0.290553
TraesCS5B03G0986000	TraesCS7A03G0769100	0.308514
TraesCS5B03G0986000	TraesCS7A03G1158100	0.294418
TraesCS5B03G0986000	TraesCS7B03G0222700	0.305871
TraesCS5B03G0986000	TraesCS7B03G0598800	0.298832
TraesCS5B03G0986000	TraesCS7D03G0120400	0.300575
TraesCS5B03G0986000	TraesCS7D03G0440800	0.311084
TraesCS5B03G0986000	TraesCS7D03G0548000	0.300987
TraesCS5B03G0986000	TraesCS7D03G0736900	0.301722
TraesCS5B03G0986000	TraesCS7D03G0815900	0.292931
TraesCS5B03G0986000	TraesCS7D03G1058600	0.30745
TraesCS5B03G0986000	TraesCS7D03G1073000	0.293107
TraesCS5B03G0986000	TraesCSU03G0017300	0.296187
TraesCS5B03G0986000	TraesCSU03G0103400	0.305903
TraesCS5B03G0986000	TraesCSU03G0241100	0.302417
TraesCS5D03G0894800	TraesCS1A03G0206000	0.308538
TraesCS5D03G0894800	TraesCS1A03G0511000	0.29182
TraesCS5D03G0894800	TraesCS1A03G0685800	0.300437
TraesCS5D03G0894800	TraesCS1B03G0341500	0.316729
TraesCS5D03G0894800	TraesCS1B03G0386500	0.305069
TraesCS5D03G0894800	TraesCS1B03G0735800	0.316923
TraesCS5D03G0894800	TraesCS1B03G0859500	0.294532
TraesCS5D03G0894800	TraesCS1B03G1127300	0.311554
TraesCS5D03G0894800	TraesCS1B03G1192600	0.296359
TraesCS5D03G0894800	TraesCS1D03G0167300	0.324027
TraesCS5D03G0894800	TraesCS1D03G0530600	0.312716
TraesCS5D03G0894800	TraesCS1D03G0845800	0.295908
TraesCS5D03G0894800	TraesCS1D03G0860000	0.301832
TraesCS5D03G0894800	TraesCS1D03G0990500	0.298298
TraesCS5D03G0894800	TraesCS2A03G0055700	0.301144
TraesCS5D03G0894800	TraesCS2A03G0055900	0.300494
TraesCS5D03G0894800	TraesCS2A03G0101400	0.30789
TraesCS5D03G0894800	TraesCS2A03G0101800	0.29664
TraesCS5D03G0894800	TraesCS2A03G0298400	0.304675
TraesCS5D03G0894800	TraesCS2A03G0723800	0.30688
TraesCS5D03G0894800	TraesCS2A03G0777700	0.31726
TraesCS5D03G0894800	TraesCS2A03G1132800	0.290114
TraesCS5D03G0894800	TraesCS2A03G1165300	0.292042
TraesCS5D03G0894800	TraesCS2B03G0030300	0.30387
TraesCS5D03G0894800	TraesCS2B03G0083000	0.298715
TraesCS5D03G0894800	TraesCS2B03G1040500	0.301378
TraesCS5D03G0894800	TraesCS2B03G1133600	0.314582
TraesCS5D03G0894800	TraesCS2B03G1411400	0.324383
TraesCS5D03G0894800	TraesCS2B03G1489900	0.319411
TraesCS5D03G0894800	TraesCS2D03G0041800	0.308397
TraesCS5D03G0894800	TraesCS2D03G0056900	0.29001
TraesCS5D03G0894800	TraesCS2D03G0098100	0.306328
TraesCS5D03G0894800	TraesCS2D03G0213200	0.304064
TraesCS5D03G0894800	TraesCS2D03G0454600	0.305552
TraesCS5D03G0894800	TraesCS2D03G0667000	0.28934
TraesCS5D03G0894800	TraesCS2D03G0721200	0.300811
TraesCS5D03G0894800	TraesCS2D03G0859400	0.31047
TraesCS5D03G0894800	TraesCS2D03G0906200	0.309263
TraesCS5D03G0894800	TraesCS2D03G1127500	0.312564
TraesCS5D03G0894800	TraesCS2D03G1330100	0.313925
TraesCS5D03G0894800	TraesCS3A03G0007900	0.298402
TraesCS5D03G0894800	TraesCS3A03G0016400	0.296744
TraesCS5D03G0894800	TraesCS3A03G0019800	0.301143
TraesCS5D03G0894800	TraesCS3A03G0032300	0.300737
TraesCS5D03G0894800	TraesCS3A03G0322800	0.301554
TraesCS5D03G0894800	TraesCS3A03G0663900	0.290939
TraesCS5D03G0894800	TraesCS3A03G0940900	0.306278
TraesCS5D03G0894800	TraesCS3A03G0997000	0.294711
TraesCS5D03G0894800	TraesCS3A03G1032900	0.292275
TraesCS5D03G0894800	TraesCS3A03G1049400	0.310085
TraesCS5D03G0894800	TraesCS3A03G1122300	0.319402
TraesCS5D03G0894800	TraesCS3B03G0017200	0.31003
TraesCS5D03G0894800	TraesCS3B03G0027400	0.30044
TraesCS5D03G0894800	TraesCS3B03G0027700	0.31781
TraesCS5D03G0894800	TraesCS3B03G0345200	0.311695
TraesCS5D03G0894800	TraesCS3B03G1071700	0.314363
TraesCS5D03G0894800	TraesCS3B03G1319000	0.296454
TraesCS5D03G0894800	TraesCS3D03G0013700	0.303785
TraesCS5D03G0894800	TraesCS3D03G0016800	0.289066
TraesCS5D03G0894800	TraesCS3D03G0064900	0.307147
TraesCS5D03G0894800	TraesCS3D03G0216400	0.296263
TraesCS5D03G0894800	TraesCS3D03G0308400	0.314419
TraesCS5D03G0894800	TraesCS3D03G0606900	0.300534
TraesCS5D03G0894800	TraesCS3D03G0826300	0.295211
TraesCS5D03G0894800	TraesCS3D03G0873600	0.316017
TraesCS5D03G0894800	TraesCS3D03G0873700	0.300036
TraesCS5D03G0894800	TraesCS3D03G0874000	0.311608
TraesCS5D03G0894800	TraesCS3D03G0953100	0.319664
TraesCS5D03G0894800	TraesCS3D03G0960800	0.296678
TraesCS5D03G0894800	TraesCS3D03G1045000	0.298493
TraesCS5D03G0894800	TraesCS3D03G1153700	0.291613
TraesCS5D03G0894800	TraesCS3D03G1180800	0.307948
TraesCS5D03G0894800	TraesCS4A03G0081500	0.29276
TraesCS5D03G0894800	TraesCS4A03G0085000	0.309406
TraesCS5D03G0894800	TraesCS4A03G0141900	0.294309
TraesCS5D03G0894800	TraesCS4A03G0536600	0.290753
TraesCS5D03G0894800	TraesCS4A03G0683400	0.328113
TraesCS5D03G0894800	TraesCS4A03G0788400	0.310861
TraesCS5D03G0894800	TraesCS4A03G0976800	0.295253
TraesCS5D03G0894800	TraesCS4A03G1010300	0.318212
TraesCS5D03G0894800	TraesCS4A03G1139100	0.307625
TraesCS5D03G0894800	TraesCS4B03G0057900	0.300371
TraesCS5D03G0894800	TraesCS4B03G0722900	0.308665
TraesCS5D03G0894800	TraesCS4B03G0799600	0.311813
TraesCS5D03G0894800	TraesCS4B03G0975200	0.309847
TraesCS5D03G0894800	TraesCS4B03G0975700	0.303725
TraesCS5D03G0894800	TraesCS4D03G0159700	0.295896
TraesCS5D03G0894800	TraesCS4D03G0222900	0.298454
TraesCS5D03G0894800	TraesCS4D03G0434100	0.309862
TraesCS5D03G0894800	TraesCS4D03G0718000	0.293441
TraesCS5D03G0894800	TraesCS5A03G0009300	0.314216
TraesCS5D03G0894800	TraesCS5A03G0579100	0.292904
TraesCS5D03G0894800	TraesCS5A03G0592700	0.292315
TraesCS5D03G0894800	TraesCS5A03G0963300	0.300169
TraesCS5D03G0894800	TraesCS5A03G1054300	0.302906
TraesCS5D03G0894800	TraesCS5A03G1161000	0.297495
TraesCS5D03G0894800	TraesCS5A03G1289300	0.289889
TraesCS5D03G0894800	TraesCS5B03G0032700	0.289101
TraesCS5D03G0894800	TraesCS5B03G0112300	0.317695
TraesCS5D03G0894800	TraesCS5B03G0371300	0.290318
TraesCS5D03G0894800	TraesCS5B03G0812100	0.310123
TraesCS5D03G0894800	TraesCS5B03G0872400	0.318153
TraesCS5D03G0894800	TraesCS5B03G0989700	0.301101
TraesCS5D03G0894800	TraesCS5B03G1136500	0.317871
TraesCS5D03G0894800	TraesCS5B03G1216200	0.311557
TraesCS5D03G0894800	TraesCS5D03G0011500	0.312025
TraesCS5D03G0894800	TraesCS5D03G0011600	0.289835
TraesCS5D03G0894800	TraesCS5D03G0011700	0.30227
TraesCS5D03G0894800	TraesCS5D03G0151700	0.291155
TraesCS5D03G0894800	TraesCS5D03G0152600	0.306304
TraesCS5D03G0894800	TraesCS5D03G0460100	0.295317
TraesCS5D03G0894800	TraesCS5D03G0528000	0.291085
TraesCS5D03G0894800	TraesCS5D03G0556000	0.30315
TraesCS5D03G0894800	TraesCS5D03G0592100	0.308343
TraesCS5D03G0894800	TraesCS5D03G0738500	0.313239
TraesCS5D03G0894800	TraesCS5D03G0839500	0.290582
TraesCS5D03G0894800	TraesCS5D03G0992800	0.290128
TraesCS5D03G0894800	TraesCS6B03G0086800	0.289636
TraesCS5D03G0894800	TraesCS6B03G0366500	0.295089
TraesCS5D03G0894800	TraesCS6B03G0366600	0.320443
TraesCS5D03G0894800	TraesCS6D03G0633900	0.292674
TraesCS5D03G0894800	TraesCS6D03G0666000	0.305932
TraesCS5D03G0894800	TraesCS6D03G0690500	0.310265
TraesCS5D03G0894800	TraesCS7A03G0769100	0.289143
TraesCS5D03G0894800	TraesCS7A03G1158100	0.312126
TraesCS5D03G0894800	TraesCS7B03G0222700	0.305606
TraesCS5D03G0894800	TraesCS7B03G0394000	0.2986
TraesCS5D03G0894800	TraesCS7B03G0714300	0.290755
TraesCS5D03G0894800	TraesCS7D03G0112900	0.290293
TraesCS5D03G0894800	TraesCS7D03G0120400	0.28981
TraesCS5D03G0894800	TraesCS7D03G0440800	0.294175
TraesCS5D03G0894800	TraesCS7D03G0548000	0.303056
TraesCS5D03G0894800	TraesCS7D03G0841700	0.303968
TraesCS5D03G0894800	TraesCS7D03G1058600	0.31016
TraesCS5D03G0894800	TraesCS7D03G1073000	0.299764
TraesCS5D03G0894800	TraesCSU03G0036600	0.304986
TraesCS5D03G0894800	TraesCSU03G0103400	0.301901
TraesCS5D03G0894800	TraesCSU03G0241100	0.307038
TraesCS5D03G0894800	TraesCSU03G0261200	0.296385
TraesCS1B03G0341500	TraesCS1B03G0735800	0.326181
TraesCS1B03G0341500	TraesCS1B03G0859500	0.326777
TraesCS1B03G0341500	TraesCS1B03G1127300	0.323633
TraesCS1B03G0341500	TraesCS1D03G0167300	0.309293
TraesCS1B03G0341500	TraesCS1D03G0530600	0.322997
TraesCS1B03G0341500	TraesCS2A03G0723800	0.327859
TraesCS1B03G0341500	TraesCS2A03G0777700	0.322272
TraesCS1B03G0341500	TraesCS2A03G1165300	0.321253
TraesCS1B03G0341500	TraesCS2B03G1040500	0.321517
TraesCS1B03G0341500	TraesCS2B03G1133600	0.323595
TraesCS1B03G0341500	TraesCS2B03G1411400	0.32263
TraesCS1B03G0341500	TraesCS2B03G1489900	0.328675
TraesCS1B03G0341500	TraesCS2D03G0056900	0.318018
TraesCS1B03G0341500	TraesCS2D03G0454600	0.334102
TraesCS1B03G0341500	TraesCS2D03G0906200	0.317103
TraesCS1B03G0341500	TraesCS2D03G1127500	0.329145
TraesCS1B03G0341500	TraesCS3A03G0016400	0.321819
TraesCS1B03G0341500	TraesCS3A03G0032300	0.324103
TraesCS1B03G0341500	TraesCS3A03G0997000	0.322443
TraesCS1B03G0341500	TraesCS3A03G1032900	0.322001
TraesCS1B03G0341500	TraesCS3A03G1049400	0.329869
TraesCS1B03G0341500	TraesCS3A03G1122300	0.325354
TraesCS1B03G0341500	TraesCS3D03G0013700	0.321622
TraesCS1B03G0341500	TraesCS3D03G0606900	0.320844
TraesCS1B03G0341500	TraesCS3D03G0826300	0.315418
TraesCS1B03G0341500	TraesCS3D03G0873600	0.323988
TraesCS1B03G0341500	TraesCS3D03G0953100	0.329976
TraesCS1B03G0341500	TraesCS3D03G1045000	0.312895
TraesCS1B03G0341500	TraesCS3D03G1153700	0.320193
TraesCS1B03G0341500	TraesCS4A03G0085000	0.317213
TraesCS1B03G0341500	TraesCS4A03G0536600	0.323013
TraesCS1B03G0341500	TraesCS4A03G0683400	0.324833
TraesCS1B03G0341500	TraesCS4A03G1010300	0.327556
TraesCS1B03G0341500	TraesCS4B03G0722900	0.329704
TraesCS1B03G0341500	TraesCS4B03G0799600	0.317472
TraesCS1B03G0341500	TraesCS4B03G0975700	0.324507
TraesCS1B03G0341500	TraesCS4D03G0222900	0.324577
TraesCS1B03G0341500	TraesCS4D03G0434100	0.326001
TraesCS1B03G0341500	TraesCS4D03G0718000	0.333627
TraesCS1B03G0341500	TraesCS5A03G0009300	0.32781
TraesCS1B03G0341500	TraesCS5A03G1289300	0.322826
TraesCS1B03G0341500	TraesCS5B03G0371300	0.315856
TraesCS1B03G0341500	TraesCS5B03G0872400	0.319753
TraesCS1B03G0341500	TraesCS5B03G1136500	0.32771
TraesCS1B03G0341500	TraesCS5B03G1216200	0.324412
TraesCS1B03G0341500	TraesCS5D03G0011500	0.326265
TraesCS1B03G0341500	TraesCS5D03G0011700	0.328199
TraesCS1B03G0341500	TraesCS5D03G0460100	0.321355
TraesCS1B03G0341500	TraesCS5D03G0528000	0.320974
TraesCS1B03G0341500	TraesCS6B03G0366500	0.323861
TraesCS1B03G0341500	TraesCS6B03G0366600	0.306046
TraesCS1B03G0341500	TraesCS6D03G0690500	0.330946
TraesCS1B03G0341500	TraesCS7A03G0769100	0.324248
TraesCS1B03G0341500	TraesCS7B03G0222700	0.324863
TraesCS1B03G0341500	TraesCS7D03G0440800	0.312959
TraesCS1B03G0341500	TraesCS7D03G0548000	0.318856
TraesCS1B03G0341500	TraesCS7D03G1058600	0.332052
TraesCS1B03G0341500	TraesCS7D03G1073000	0.313751
TraesCS1B03G0341500	TraesCSU03G0103400	0.32108
TraesCS1B03G0735800	TraesCS1B03G0859500	0.332579
TraesCS1B03G0735800	TraesCS1B03G1127300	0.339025
TraesCS1B03G0735800	TraesCS1D03G0167300	0.319537
TraesCS1B03G0735800	TraesCS1D03G0530600	0.332872
TraesCS1B03G0735800	TraesCS2A03G0723800	0.326835
TraesCS1B03G0735800	TraesCS2A03G0777700	0.340593
TraesCS1B03G0735800	TraesCS2A03G1165300	0.305288
TraesCS1B03G0735800	TraesCS2B03G1040500	0.331145
TraesCS1B03G0735800	TraesCS2B03G1133600	0.327071
TraesCS1B03G0735800	TraesCS2B03G1411400	0.323651
TraesCS1B03G0735800	TraesCS2B03G1489900	0.331607
TraesCS1B03G0735800	TraesCS2D03G0056900	0.32335
TraesCS1B03G0735800	TraesCS2D03G0454600	0.334485
TraesCS1B03G0735800	TraesCS2D03G0906200	0.342979
TraesCS1B03G0735800	TraesCS2D03G1127500	0.340269
TraesCS1B03G0735800	TraesCS3A03G0016400	0.328301
TraesCS1B03G0735800	TraesCS3A03G0032300	0.349063
TraesCS1B03G0735800	TraesCS3A03G0997000	0.347686
TraesCS1B03G0735800	TraesCS3A03G1032900	0.350507
TraesCS1B03G0735800	TraesCS3A03G1049400	0.333656
TraesCS1B03G0735800	TraesCS3A03G1122300	0.326763
TraesCS1B03G0735800	TraesCS3D03G0013700	0.328153
TraesCS1B03G0735800	TraesCS3D03G0606900	0.342302
TraesCS1B03G0735800	TraesCS3D03G0826300	0.320816
TraesCS1B03G0735800	TraesCS3D03G0873600	0.34025
TraesCS1B03G0735800	TraesCS3D03G0953100	0.329343
TraesCS1B03G0735800	TraesCS3D03G1045000	0.301941
TraesCS1B03G0735800	TraesCS3D03G1153700	0.329847
TraesCS1B03G0735800	TraesCS4A03G0085000	0.347697
TraesCS1B03G0735800	TraesCS4A03G0536600	0.317256
TraesCS1B03G0735800	TraesCS4A03G0683400	0.323747
TraesCS1B03G0735800	TraesCS4A03G1010300	0.337326
TraesCS1B03G0735800	TraesCS4B03G0722900	0.341831
TraesCS1B03G0735800	TraesCS4B03G0799600	0.336321
TraesCS1B03G0735800	TraesCS4B03G0975700	0.3307
TraesCS1B03G0735800	TraesCS4D03G0222900	0.319995
TraesCS1B03G0735800	TraesCS4D03G0434100	0.334129
TraesCS1B03G0735800	TraesCS4D03G0718000	0.334336
TraesCS1B03G0735800	TraesCS5A03G0009300	0.325694
TraesCS1B03G0735800	TraesCS5A03G1289300	0.329852
TraesCS1B03G0735800	TraesCS5B03G0371300	0.309239
TraesCS1B03G0735800	TraesCS5B03G0872400	0.327157
TraesCS1B03G0735800	TraesCS5B03G1136500	0.326705
TraesCS1B03G0735800	TraesCS5B03G1216200	0.341596
TraesCS1B03G0735800	TraesCS5D03G0011500	0.328602
TraesCS1B03G0735800	TraesCS5D03G0011700	0.343826
TraesCS1B03G0735800	TraesCS5D03G0460100	0.319202
TraesCS1B03G0735800	TraesCS5D03G0528000	0.315074
TraesCS1B03G0735800	TraesCS6B03G0366500	0.330589
TraesCS1B03G0735800	TraesCS6B03G0366600	0.32055
TraesCS1B03G0735800	TraesCS6D03G0690500	0.338542
TraesCS1B03G0735800	TraesCS7A03G0769100	0.323513
TraesCS1B03G0735800	TraesCS7B03G0222700	0.339806
TraesCS1B03G0735800	TraesCS7D03G0440800	0.313632
TraesCS1B03G0735800	TraesCS7D03G0548000	0.345841
TraesCS1B03G0735800	TraesCS7D03G1058600	0.333869
TraesCS1B03G0735800	TraesCS7D03G1073000	0.319457
TraesCS1B03G0735800	TraesCSU03G0103400	0.32679
TraesCS1B03G0859500	TraesCS1B03G1127300	0.331311
TraesCS1B03G0859500	TraesCS1D03G0167300	0.318259
TraesCS1B03G0859500	TraesCS1D03G0530600	0.330169
TraesCS1B03G0859500	TraesCS2A03G0723800	0.339909
TraesCS1B03G0859500	TraesCS2A03G0777700	0.323555
TraesCS1B03G0859500	TraesCS2A03G1165300	0.331688
TraesCS1B03G0859500	TraesCS2B03G1040500	0.327293
TraesCS1B03G0859500	TraesCS2B03G1133600	0.338598
TraesCS1B03G0859500	TraesCS2B03G1411400	0.334171
TraesCS1B03G0859500	TraesCS2B03G1489900	0.331831
TraesCS1B03G0859500	TraesCS2D03G0056900	0.337347
TraesCS1B03G0859500	TraesCS2D03G0454600	0.330447
TraesCS1B03G0859500	TraesCS2D03G0906200	0.32194
TraesCS1B03G0859500	TraesCS2D03G1127500	0.325278
TraesCS1B03G0859500	TraesCS3A03G0016400	0.342826
TraesCS1B03G0859500	TraesCS3A03G0032300	0.338951
TraesCS1B03G0859500	TraesCS3A03G0997000	0.335639
TraesCS1B03G0859500	TraesCS3A03G1032900	0.339677
TraesCS1B03G0859500	TraesCS3A03G1049400	0.337246
TraesCS1B03G0859500	TraesCS3A03G1122300	0.331268
TraesCS1B03G0859500	TraesCS3D03G0013700	0.341831
TraesCS1B03G0859500	TraesCS3D03G0606900	0.332517
TraesCS1B03G0859500	TraesCS3D03G0826300	0.333715
TraesCS1B03G0859500	TraesCS3D03G0873600	0.329662
TraesCS1B03G0859500	TraesCS3D03G0953100	0.332687
TraesCS1B03G0859500	TraesCS3D03G1045000	0.319237
TraesCS1B03G0859500	TraesCS3D03G1153700	0.336602
TraesCS1B03G0859500	TraesCS4A03G0085000	0.321253
TraesCS1B03G0859500	TraesCS4A03G0536600	0.337149
TraesCS1B03G0859500	TraesCS4A03G0683400	0.330258
TraesCS1B03G0859500	TraesCS4A03G1010300	0.320896
TraesCS1B03G0859500	TraesCS4B03G0722900	0.335433
TraesCS1B03G0859500	TraesCS4B03G0799600	0.323272
TraesCS1B03G0859500	TraesCS4B03G0975700	0.337298
TraesCS1B03G0859500	TraesCS4D03G0222900	0.339116
TraesCS1B03G0859500	TraesCS4D03G0434100	0.329941
TraesCS1B03G0859500	TraesCS4D03G0718000	0.340547
TraesCS1B03G0859500	TraesCS5A03G0009300	0.338802
TraesCS1B03G0859500	TraesCS5A03G1289300	0.340814
TraesCS1B03G0859500	TraesCS5B03G0371300	0.313101
TraesCS1B03G0859500	TraesCS5B03G0872400	0.33395
TraesCS1B03G0859500	TraesCS5B03G1136500	0.335664
TraesCS1B03G0859500	TraesCS5B03G1216200	0.330499
TraesCS1B03G0859500	TraesCS5D03G0011500	0.333561
TraesCS1B03G0859500	TraesCS5D03G0011700	0.33971
TraesCS1B03G0859500	TraesCS5D03G0460100	0.339466
TraesCS1B03G0859500	TraesCS5D03G0528000	0.327097
TraesCS1B03G0859500	TraesCS6B03G0366500	0.342121
TraesCS1B03G0859500	TraesCS6B03G0366600	0.317052
TraesCS1B03G0859500	TraesCS6D03G0690500	0.339986
TraesCS1B03G0859500	TraesCS7A03G0769100	0.331339
TraesCS1B03G0859500	TraesCS7B03G0222700	0.333934
TraesCS1B03G0859500	TraesCS7D03G0440800	0.319843
TraesCS1B03G0859500	TraesCS7D03G0548000	0.331601
TraesCS1B03G0859500	TraesCS7D03G1058600	0.337154
TraesCS1B03G0859500	TraesCS7D03G1073000	0.328994
TraesCS1B03G0859500	TraesCSU03G0103400	0.342047
TraesCS1B03G1127300	TraesCS1D03G0167300	0.321427
TraesCS1B03G1127300	TraesCS1D03G0530600	0.336003
TraesCS1B03G1127300	TraesCS2A03G0723800	0.337815
TraesCS1B03G1127300	TraesCS2A03G0777700	0.344652
TraesCS1B03G1127300	TraesCS2A03G1165300	0.300044
TraesCS1B03G1127300	TraesCS2B03G1040500	0.330313
TraesCS1B03G1127300	TraesCS2B03G1133600	0.33431
TraesCS1B03G1127300	TraesCS2B03G1411400	0.323827
TraesCS1B03G1127300	TraesCS2B03G1489900	0.335329
TraesCS1B03G1127300	TraesCS2D03G0056900	0.320575
TraesCS1B03G1127300	TraesCS2D03G0454600	0.334389
TraesCS1B03G1127300	TraesCS2D03G0906200	0.34051
TraesCS1B03G1127300	TraesCS2D03G1127500	0.343133
TraesCS1B03G1127300	TraesCS3A03G0016400	0.330211
TraesCS1B03G1127300	TraesCS3A03G0032300	0.344083
TraesCS1B03G1127300	TraesCS3A03G0997000	0.34483
TraesCS1B03G1127300	TraesCS3A03G1032900	0.348106
TraesCS1B03G1127300	TraesCS3A03G1049400	0.337102
TraesCS1B03G1127300	TraesCS3A03G1122300	0.325535
TraesCS1B03G1127300	TraesCS3D03G0013700	0.329971
TraesCS1B03G1127300	TraesCS3D03G0606900	0.341559
TraesCS1B03G1127300	TraesCS3D03G0826300	0.323963
TraesCS1B03G1127300	TraesCS3D03G0873600	0.338592
TraesCS1B03G1127300	TraesCS3D03G0953100	0.338495
TraesCS1B03G1127300	TraesCS3D03G1045000	0.293346
TraesCS1B03G1127300	TraesCS3D03G1153700	0.331183
TraesCS1B03G1127300	TraesCS4A03G0085000	0.344341
TraesCS1B03G1127300	TraesCS4A03G0536600	0.314976
TraesCS1B03G1127300	TraesCS4A03G0683400	0.32616
TraesCS1B03G1127300	TraesCS4A03G1010300	0.339747
TraesCS1B03G1127300	TraesCS4B03G0722900	0.340371
TraesCS1B03G1127300	TraesCS4B03G0799600	0.344738
TraesCS1B03G1127300	TraesCS4B03G0975700	0.334666
TraesCS1B03G1127300	TraesCS4D03G0222900	0.317396
TraesCS1B03G1127300	TraesCS4D03G0434100	0.339046
TraesCS1B03G1127300	TraesCS4D03G0718000	0.336495
TraesCS1B03G1127300	TraesCS5A03G0009300	0.324496
TraesCS1B03G1127300	TraesCS5A03G1289300	0.333332
TraesCS1B03G1127300	TraesCS5B03G0371300	0.304805
TraesCS1B03G1127300	TraesCS5B03G0872400	0.328351
TraesCS1B03G1127300	TraesCS5B03G1136500	0.325614
TraesCS1B03G1127300	TraesCS5B03G1216200	0.341601
TraesCS1B03G1127300	TraesCS5D03G0011500	0.343098
TraesCS1B03G1127300	TraesCS5D03G0011700	0.338702
TraesCS1B03G1127300	TraesCS5D03G0460100	0.316876
TraesCS1B03G1127300	TraesCS5D03G0528000	0.309864
TraesCS1B03G1127300	TraesCS6B03G0366500	0.332065
TraesCS1B03G1127300	TraesCS6B03G0366600	0.333516
TraesCS1B03G1127300	TraesCS6D03G0690500	0.336305
TraesCS1B03G1127300	TraesCS7A03G0769100	0.321449
TraesCS1B03G1127300	TraesCS7B03G0222700	0.339602
TraesCS1B03G1127300	TraesCS7D03G0440800	0.311332
TraesCS1B03G1127300	TraesCS7D03G0548000	0.340619
TraesCS1B03G1127300	TraesCS7D03G1058600	0.33604
TraesCS1B03G1127300	TraesCS7D03G1073000	0.328481
TraesCS1B03G1127300	TraesCSU03G0103400	0.326169
TraesCS1D03G0167300	TraesCS1D03G0530600	0.31973
TraesCS1D03G0167300	TraesCS2A03G0723800	0.311727
TraesCS1D03G0167300	TraesCS2A03G0777700	0.328506
TraesCS1D03G0167300	TraesCS2B03G1040500	0.306607
TraesCS1D03G0167300	TraesCS2B03G1133600	0.309864
TraesCS1D03G0167300	TraesCS2B03G1411400	0.306482
TraesCS1D03G0167300	TraesCS2B03G1489900	0.322059
TraesCS1D03G0167300	TraesCS2D03G0056900	0.302491
TraesCS1D03G0167300	TraesCS2D03G0454600	0.326814
TraesCS1D03G0167300	TraesCS2D03G0906200	0.328094
TraesCS1D03G0167300	TraesCS2D03G1127500	0.335016
TraesCS1D03G0167300	TraesCS3A03G0016400	0.303018
TraesCS1D03G0167300	TraesCS3A03G0032300	0.327665
TraesCS1D03G0167300	TraesCS3A03G0997000	0.325119
TraesCS1D03G0167300	TraesCS3A03G1032900	0.326907
TraesCS1D03G0167300	TraesCS3A03G1049400	0.318614
TraesCS1D03G0167300	TraesCS3A03G1122300	0.318771
TraesCS1D03G0167300	TraesCS3D03G0013700	0.302473
TraesCS1D03G0167300	TraesCS3D03G0606900	0.320482
TraesCS1D03G0167300	TraesCS3D03G0826300	0.295599
TraesCS1D03G0167300	TraesCS3D03G0873600	0.326733
TraesCS1D03G0167300	TraesCS3D03G0953100	0.321724
TraesCS1D03G0167300	TraesCS3D03G1045000	0.289673
TraesCS1D03G0167300	TraesCS3D03G1153700	0.31075
TraesCS1D03G0167300	TraesCS4A03G0085000	0.331933
TraesCS1D03G0167300	TraesCS4A03G0536600	0.289746
TraesCS1D03G0167300	TraesCS4A03G0683400	0.314077
TraesCS1D03G0167300	TraesCS4A03G1010300	0.334607
TraesCS1D03G0167300	TraesCS4B03G0722900	0.327771
TraesCS1D03G0167300	TraesCS4B03G0799600	0.322631
TraesCS1D03G0167300	TraesCS4B03G0975700	0.313493
TraesCS1D03G0167300	TraesCS4D03G0222900	0.304077
TraesCS1D03G0167300	TraesCS4D03G0434100	0.324131
TraesCS1D03G0167300	TraesCS4D03G0718000	0.319042
TraesCS1D03G0167300	TraesCS5A03G0009300	0.311265
TraesCS1D03G0167300	TraesCS5A03G1289300	0.308426
TraesCS1D03G0167300	TraesCS5B03G0371300	0.303539
TraesCS1D03G0167300	TraesCS5B03G0872400	0.307462
TraesCS1D03G0167300	TraesCS5B03G1136500	0.31406
TraesCS1D03G0167300	TraesCS5B03G1216200	0.326102
TraesCS1D03G0167300	TraesCS5D03G0011500	0.319015
TraesCS1D03G0167300	TraesCS5D03G0011700	0.325278
TraesCS1D03G0167300	TraesCS5D03G0460100	0.301482
TraesCS1D03G0167300	TraesCS5D03G0528000	0.303246
TraesCS1D03G0167300	TraesCS6B03G0366500	0.307469
TraesCS1D03G0167300	TraesCS6B03G0366600	0.307978
TraesCS1D03G0167300	TraesCS6D03G0690500	0.321182
TraesCS1D03G0167300	TraesCS7A03G0769100	0.311129
TraesCS1D03G0167300	TraesCS7B03G0222700	0.322034
TraesCS1D03G0167300	TraesCS7D03G0440800	0.307341
TraesCS1D03G0167300	TraesCS7D03G0548000	0.326175
TraesCS1D03G0167300	TraesCS7D03G1058600	0.319694
TraesCS1D03G0167300	TraesCS7D03G1073000	0.296347
TraesCS1D03G0167300	TraesCSU03G0103400	0.301444
TraesCS1D03G0530600	TraesCS2A03G0723800	0.332571
TraesCS1D03G0530600	TraesCS2A03G0777700	0.332251
TraesCS1D03G0530600	TraesCS2A03G1165300	0.309095
TraesCS1D03G0530600	TraesCS2B03G1040500	0.327992
TraesCS1D03G0530600	TraesCS2B03G1133600	0.334753
TraesCS1D03G0530600	TraesCS2B03G1411400	0.32721
TraesCS1D03G0530600	TraesCS2B03G1489900	0.331682
TraesCS1D03G0530600	TraesCS2D03G0056900	0.323483
TraesCS1D03G0530600	TraesCS2D03G0454600	0.328926
TraesCS1D03G0530600	TraesCS2D03G0906200	0.33587
TraesCS1D03G0530600	TraesCS2D03G1127500	0.334381
TraesCS1D03G0530600	TraesCS3A03G0016400	0.33133
TraesCS1D03G0530600	TraesCS3A03G0032300	0.341274
TraesCS1D03G0530600	TraesCS3A03G0997000	0.337413
TraesCS1D03G0530600	TraesCS3A03G1032900	0.34147
TraesCS1D03G0530600	TraesCS3A03G1049400	0.328532
TraesCS1D03G0530600	TraesCS3A03G1122300	0.323176
TraesCS1D03G0530600	TraesCS3D03G0013700	0.333572
TraesCS1D03G0530600	TraesCS3D03G0606900	0.336544
TraesCS1D03G0530600	TraesCS3D03G0826300	0.320609
TraesCS1D03G0530600	TraesCS3D03G0873600	0.332078
TraesCS1D03G0530600	TraesCS3D03G0953100	0.332029
TraesCS1D03G0530600	TraesCS3D03G1045000	0.301402
TraesCS1D03G0530600	TraesCS3D03G1153700	0.328395
TraesCS1D03G0530600	TraesCS4A03G0085000	0.338193
TraesCS1D03G0530600	TraesCS4A03G0536600	0.318231
TraesCS1D03G0530600	TraesCS4A03G0683400	0.325225
TraesCS1D03G0530600	TraesCS4A03G1010300	0.329344
TraesCS1D03G0530600	TraesCS4B03G0722900	0.332226
TraesCS1D03G0530600	TraesCS4B03G0799600	0.326712
TraesCS1D03G0530600	TraesCS4B03G0975700	0.328634
TraesCS1D03G0530600	TraesCS4D03G0222900	0.317736
TraesCS1D03G0530600	TraesCS4D03G0434100	0.325608
TraesCS1D03G0530600	TraesCS4D03G0718000	0.334104
TraesCS1D03G0530600	TraesCS5A03G0009300	0.325395
TraesCS1D03G0530600	TraesCS5A03G1289300	0.326262
TraesCS1D03G0530600	TraesCS5B03G0371300	0.308794
TraesCS1D03G0530600	TraesCS5B03G0872400	0.329969
TraesCS1D03G0530600	TraesCS5B03G1136500	0.321602
TraesCS1D03G0530600	TraesCS5B03G1216200	0.329721
TraesCS1D03G0530600	TraesCS5D03G0011500	0.334471
TraesCS1D03G0530600	TraesCS5D03G0011700	0.337628
TraesCS1D03G0530600	TraesCS5D03G0460100	0.318532
TraesCS1D03G0530600	TraesCS5D03G0528000	0.316659
TraesCS1D03G0530600	TraesCS6B03G0366500	0.327037
TraesCS1D03G0530600	TraesCS6B03G0366600	0.322997
TraesCS1D03G0530600	TraesCS6D03G0690500	0.337546
TraesCS1D03G0530600	TraesCS7A03G0769100	0.325532
TraesCS1D03G0530600	TraesCS7B03G0222700	0.33242
TraesCS1D03G0530600	TraesCS7D03G0440800	0.314077
TraesCS1D03G0530600	TraesCS7D03G0548000	0.337922
TraesCS1D03G0530600	TraesCS7D03G1058600	0.329911
TraesCS1D03G0530600	TraesCS7D03G1073000	0.321434
TraesCS1D03G0530600	TraesCSU03G0103400	0.32978
TraesCS2A03G0723800	TraesCS2A03G0777700	0.342973
TraesCS2A03G0723800	TraesCS2A03G1165300	0.315722
TraesCS2A03G0723800	TraesCS2B03G1040500	0.336836
TraesCS2A03G0723800	TraesCS2B03G1133600	0.322137
TraesCS2A03G0723800	TraesCS2B03G1411400	0.322154
TraesCS2A03G0723800	TraesCS2B03G1489900	0.333354
TraesCS2A03G0723800	TraesCS2D03G0056900	0.326195
TraesCS2A03G0723800	TraesCS2D03G0454600	0.347
TraesCS2A03G0723800	TraesCS2D03G0906200	0.339046
TraesCS2A03G0723800	TraesCS2D03G1127500	0.3412
TraesCS2A03G0723800	TraesCS3A03G0016400	0.326326
TraesCS2A03G0723800	TraesCS3A03G0032300	0.349839
TraesCS2A03G0723800	TraesCS3A03G0997000	0.351775
TraesCS2A03G0723800	TraesCS3A03G1032900	0.353222
TraesCS2A03G0723800	TraesCS3A03G1049400	0.339215
TraesCS2A03G0723800	TraesCS3A03G1122300	0.326249
TraesCS2A03G0723800	TraesCS3D03G0013700	0.325004
TraesCS2A03G0723800	TraesCS3D03G0606900	0.341425
TraesCS2A03G0723800	TraesCS3D03G0826300	0.327436
TraesCS2A03G0723800	TraesCS3D03G0873600	0.339162
TraesCS2A03G0723800	TraesCS3D03G0953100	0.331576
TraesCS2A03G0723800	TraesCS3D03G1045000	0.307723
TraesCS2A03G0723800	TraesCS3D03G1153700	0.332608
TraesCS2A03G0723800	TraesCS4A03G0085000	0.344394
TraesCS2A03G0723800	TraesCS4A03G0536600	0.327456
TraesCS2A03G0723800	TraesCS4A03G0683400	0.320188
TraesCS2A03G0723800	TraesCS4A03G1010300	0.34134
TraesCS2A03G0723800	TraesCS4B03G0722900	0.349101
TraesCS2A03G0723800	TraesCS4B03G0799600	0.34139
TraesCS2A03G0723800	TraesCS4B03G0975700	0.331698
TraesCS2A03G0723800	TraesCS4D03G0222900	0.326041
TraesCS2A03G0723800	TraesCS4D03G0434100	0.345333
TraesCS2A03G0723800	TraesCS4D03G0718000	0.341511
TraesCS2A03G0723800	TraesCS5A03G0009300	0.325419
TraesCS2A03G0723800	TraesCS5A03G1289300	0.33362
TraesCS2A03G0723800	TraesCS5B03G0371300	0.311799
TraesCS2A03G0723800	TraesCS5B03G0872400	0.321203
TraesCS2A03G0723800	TraesCS5B03G1136500	0.329607
TraesCS2A03G0723800	TraesCS5B03G1216200	0.346292
TraesCS2A03G0723800	TraesCS5D03G0011500	0.330778
TraesCS2A03G0723800	TraesCS5D03G0011700	0.347679
TraesCS2A03G0723800	TraesCS5D03G0460100	0.321333
TraesCS2A03G0723800	TraesCS5D03G0528000	0.322111
TraesCS2A03G0723800	TraesCS6B03G0366500	0.331683
TraesCS2A03G0723800	TraesCS6B03G0366600	0.313649
TraesCS2A03G0723800	TraesCS6D03G0690500	0.340817
TraesCS2A03G0723800	TraesCS7A03G0769100	0.32826
TraesCS2A03G0723800	TraesCS7B03G0222700	0.341089
TraesCS2A03G0723800	TraesCS7D03G0440800	0.312508
TraesCS2A03G0723800	TraesCS7D03G0548000	0.343009
TraesCS2A03G0723800	TraesCS7D03G1058600	0.34144
TraesCS2A03G0723800	TraesCS7D03G1073000	0.323889
TraesCS2A03G0723800	TraesCSU03G0103400	0.325471
TraesCS2A03G0777700	TraesCS2A03G1165300	0.319746
TraesCS2A03G0777700	TraesCS2B03G1040500	0.328564
TraesCS2A03G0777700	TraesCS2B03G1133600	0.342137
TraesCS2A03G0777700	TraesCS2B03G1411400	0.336559
TraesCS2A03G0777700	TraesCS2B03G1489900	0.339794
TraesCS2A03G0777700	TraesCS2D03G0056900	0.322408
TraesCS2A03G0777700	TraesCS2D03G0454600	0.326066
TraesCS2A03G0777700	TraesCS2D03G0906200	0.329424
TraesCS2A03G0777700	TraesCS2D03G1127500	0.33092
TraesCS2A03G0777700	TraesCS3A03G0016400	0.337894
TraesCS2A03G0777700	TraesCS3A03G0032300	0.340008
TraesCS2A03G0777700	TraesCS3A03G0997000	0.340436
TraesCS2A03G0777700	TraesCS3A03G1032900	0.340582
TraesCS2A03G0777700	TraesCS3A03G1049400	0.337106
TraesCS2A03G0777700	TraesCS3A03G1122300	0.325852
TraesCS2A03G0777700	TraesCS3D03G0013700	0.340423
TraesCS2A03G0777700	TraesCS3D03G0606900	0.345445
TraesCS2A03G0777700	TraesCS3D03G0826300	0.332675
TraesCS2A03G0777700	TraesCS3D03G0873600	0.334316
TraesCS2A03G0777700	TraesCS3D03G0953100	0.340346
TraesCS2A03G0777700	TraesCS3D03G1045000	0.30565
TraesCS2A03G0777700	TraesCS3D03G1153700	0.326483
TraesCS2A03G0777700	TraesCS4A03G0085000	0.333619
TraesCS2A03G0777700	TraesCS4A03G0536600	0.329755
TraesCS2A03G0777700	TraesCS4A03G0683400	0.334304
TraesCS2A03G0777700	TraesCS4A03G1010300	0.326902
TraesCS2A03G0777700	TraesCS4B03G0722900	0.336193
TraesCS2A03G0777700	TraesCS4B03G0799600	0.329377
TraesCS2A03G0777700	TraesCS4B03G0975700	0.335508
TraesCS2A03G0777700	TraesCS4D03G0222900	0.324343
TraesCS2A03G0777700	TraesCS4D03G0434100	0.328549
TraesCS2A03G0777700	TraesCS4D03G0718000	0.333111
TraesCS2A03G0777700	TraesCS5A03G0009300	0.332969
TraesCS2A03G0777700	TraesCS5A03G1289300	0.3329
TraesCS2A03G0777700	TraesCS5B03G0371300	0.309966
TraesCS2A03G0777700	TraesCS5B03G0872400	0.33707
TraesCS2A03G0777700	TraesCS5B03G1136500	0.330685
TraesCS2A03G0777700	TraesCS5B03G1216200	0.337664
TraesCS2A03G0777700	TraesCS5D03G0011500	0.343286
TraesCS2A03G0777700	TraesCS5D03G0011700	0.336397
TraesCS2A03G0777700	TraesCS5D03G0460100	0.324608
TraesCS2A03G0777700	TraesCS5D03G0528000	0.312698
TraesCS2A03G0777700	TraesCS6B03G0366500	0.33492
TraesCS2A03G0777700	TraesCS6B03G0366600	0.333245
TraesCS2A03G0777700	TraesCS6D03G0690500	0.344805
TraesCS2A03G0777700	TraesCS7A03G0769100	0.319185
TraesCS2A03G0777700	TraesCS7B03G0222700	0.335696
TraesCS2A03G0777700	TraesCS7D03G0440800	0.308133
TraesCS2A03G0777700	TraesCS7D03G0548000	0.336219
TraesCS2A03G0777700	TraesCS7D03G1058600	0.338992
TraesCS2A03G0777700	TraesCS7D03G1073000	0.334408
TraesCS2A03G0777700	TraesCSU03G0103400	0.336524
TraesCS2A03G1165300	TraesCS2B03G1040500	0.318991
TraesCS2A03G1165300	TraesCS2B03G1133600	0.305283
TraesCS2A03G1165300	TraesCS2B03G1411400	0.309427
TraesCS2A03G1165300	TraesCS2B03G1489900	0.310597
TraesCS2A03G1165300	TraesCS2D03G0056900	0.323299
TraesCS2A03G1165300	TraesCS2D03G0454600	0.347056
TraesCS2A03G1165300	TraesCS2D03G0906200	0.308422
TraesCS2A03G1165300	TraesCS2D03G1127500	0.327054
TraesCS2A03G1165300	TraesCS3A03G0016400	0.306722
TraesCS2A03G1165300	TraesCS3A03G0032300	0.317436
TraesCS2A03G1165300	TraesCS3A03G0997000	0.31746
TraesCS2A03G1165300	TraesCS3A03G1032900	0.31872
TraesCS2A03G1165300	TraesCS3A03G1049400	0.318237
TraesCS2A03G1165300	TraesCS3A03G1122300	0.324456
TraesCS2A03G1165300	TraesCS3D03G0013700	0.304124
TraesCS2A03G1165300	TraesCS3D03G0606900	0.298292
TraesCS2A03G1165300	TraesCS3D03G0826300	0.310623
TraesCS2A03G1165300	TraesCS3D03G0873600	0.312855
TraesCS2A03G1165300	TraesCS3D03G0953100	0.311736
TraesCS2A03G1165300	TraesCS3D03G1045000	0.311175
TraesCS2A03G1165300	TraesCS3D03G1153700	0.320591
TraesCS2A03G1165300	TraesCS4A03G0085000	0.308963
TraesCS2A03G1165300	TraesCS4A03G0536600	0.31005
TraesCS2A03G1165300	TraesCS4A03G0683400	0.310084
TraesCS2A03G1165300	TraesCS4A03G1010300	0.330911
TraesCS2A03G1165300	TraesCS4B03G0722900	0.329928
TraesCS2A03G1165300	TraesCS4B03G0799600	0.322407
TraesCS2A03G1165300	TraesCS4B03G0975700	0.310547
TraesCS2A03G1165300	TraesCS4D03G0222900	0.32959
TraesCS2A03G1165300	TraesCS4D03G0434100	0.334656
TraesCS2A03G1165300	TraesCS4D03G0718000	0.342196
TraesCS2A03G1165300	TraesCS5A03G0009300	0.319808
TraesCS2A03G1165300	TraesCS5A03G1289300	0.315732
TraesCS2A03G1165300	TraesCS5B03G0371300	0.312167
TraesCS2A03G1165300	TraesCS5B03G0872400	0.300559
TraesCS2A03G1165300	TraesCS5B03G1136500	0.327572
TraesCS2A03G1165300	TraesCS5B03G1216200	0.317437
TraesCS2A03G1165300	TraesCS5D03G0011500	0.30528
TraesCS2A03G1165300	TraesCS5D03G0011700	0.325206
TraesCS2A03G1165300	TraesCS5D03G0460100	0.319893
TraesCS2A03G1165300	TraesCS5D03G0528000	0.33568
TraesCS2A03G1165300	TraesCS6B03G0366500	0.318239
TraesCS2A03G1165300	TraesCS6D03G0690500	0.311609
TraesCS2A03G1165300	TraesCS7A03G0769100	0.329913
TraesCS2A03G1165300	TraesCS7B03G0222700	0.31433
TraesCS2A03G1165300	TraesCS7D03G0440800	0.321294
TraesCS2A03G1165300	TraesCS7D03G0548000	0.308217
TraesCS2A03G1165300	TraesCS7D03G1058600	0.321087
TraesCS2A03G1165300	TraesCS7D03G1073000	0.304957
TraesCS2A03G1165300	TraesCSU03G0103400	0.307992
TraesCS2B03G1040500	TraesCS2B03G1133600	0.328973
TraesCS2B03G1040500	TraesCS2B03G1411400	0.328985
TraesCS2B03G1040500	TraesCS2B03G1489900	0.334597
TraesCS2B03G1040500	TraesCS2D03G0056900	0.325322
TraesCS2B03G1040500	TraesCS2D03G0454600	0.333983
TraesCS2B03G1040500	TraesCS2D03G0906200	0.318577
TraesCS2B03G1040500	TraesCS2D03G1127500	0.324492
TraesCS2B03G1040500	TraesCS3A03G0016400	0.328104
TraesCS2B03G1040500	TraesCS3A03G0032300	0.330332
TraesCS2B03G1040500	TraesCS3A03G0997000	0.331922
TraesCS2B03G1040500	TraesCS3A03G1032900	0.3294
TraesCS2B03G1040500	TraesCS3A03G1049400	0.33757
TraesCS2B03G1040500	TraesCS3A03G1122300	0.33069
TraesCS2B03G1040500	TraesCS3D03G0013700	0.327609
TraesCS2B03G1040500	TraesCS3D03G0606900	0.328529
TraesCS2B03G1040500	TraesCS3D03G0826300	0.324937
TraesCS2B03G1040500	TraesCS3D03G0873600	0.329159
TraesCS2B03G1040500	TraesCS3D03G0953100	0.336536
TraesCS2B03G1040500	TraesCS3D03G1045000	0.308222
TraesCS2B03G1040500	TraesCS3D03G1153700	0.327108
TraesCS2B03G1040500	TraesCS4A03G0085000	0.319763
TraesCS2B03G1040500	TraesCS4A03G0536600	0.322604
TraesCS2B03G1040500	TraesCS4A03G0683400	0.330032
TraesCS2B03G1040500	TraesCS4A03G1010300	0.322941
TraesCS2B03G1040500	TraesCS4B03G0722900	0.338762
TraesCS2B03G1040500	TraesCS4B03G0799600	0.328448
TraesCS2B03G1040500	TraesCS4B03G0975700	0.33047
TraesCS2B03G1040500	TraesCS4D03G0222900	0.332366
TraesCS2B03G1040500	TraesCS4D03G0434100	0.336533
TraesCS2B03G1040500	TraesCS4D03G0718000	0.332164
TraesCS2B03G1040500	TraesCS5A03G0009300	0.333866
TraesCS2B03G1040500	TraesCS5A03G1289300	0.330093
TraesCS2B03G1040500	TraesCS5B03G0371300	0.300954
TraesCS2B03G1040500	TraesCS5B03G0872400	0.324361
TraesCS2B03G1040500	TraesCS5B03G1136500	0.335799
TraesCS2B03G1040500	TraesCS5B03G1216200	0.333133
TraesCS2B03G1040500	TraesCS5D03G0011500	0.332788
TraesCS2B03G1040500	TraesCS5D03G0011700	0.335122
TraesCS2B03G1040500	TraesCS5D03G0460100	0.326792
TraesCS2B03G1040500	TraesCS5D03G0528000	0.321779
TraesCS2B03G1040500	TraesCS6B03G0366500	0.332024
TraesCS2B03G1040500	TraesCS6B03G0366600	0.310841
TraesCS2B03G1040500	TraesCS6D03G0690500	0.337411
TraesCS2B03G1040500	TraesCS7A03G0769100	0.320722
TraesCS2B03G1040500	TraesCS7B03G0222700	0.331382
TraesCS2B03G1040500	TraesCS7D03G0440800	0.306067
TraesCS2B03G1040500	TraesCS7D03G0548000	0.32391
TraesCS2B03G1040500	TraesCS7D03G1058600	0.340662
TraesCS2B03G1040500	TraesCS7D03G1073000	0.321102
TraesCS2B03G1040500	TraesCSU03G0103400	0.327233
TraesCS2B03G1133600	TraesCS2B03G1411400	0.317536
TraesCS2B03G1133600	TraesCS2B03G1489900	0.330447
TraesCS2B03G1133600	TraesCS2D03G0056900	0.3221
TraesCS2B03G1133600	TraesCS2D03G0454600	0.340399
TraesCS2B03G1133600	TraesCS2D03G0906200	0.341715
TraesCS2B03G1133600	TraesCS2D03G1127500	0.341432
TraesCS2B03G1133600	TraesCS3A03G0016400	0.3226
TraesCS2B03G1133600	TraesCS3A03G0032300	0.347422
TraesCS2B03G1133600	TraesCS3A03G0997000	0.344609
TraesCS2B03G1133600	TraesCS3A03G1032900	0.346845
TraesCS2B03G1133600	TraesCS3A03G1049400	0.336162
TraesCS2B03G1133600	TraesCS3A03G1122300	0.328548
TraesCS2B03G1133600	TraesCS3D03G0013700	0.320466
TraesCS2B03G1133600	TraesCS3D03G0606900	0.33625
TraesCS2B03G1133600	TraesCS3D03G0826300	0.312698
TraesCS2B03G1133600	TraesCS3D03G0873600	0.340711
TraesCS2B03G1133600	TraesCS3D03G0953100	0.329094
TraesCS2B03G1133600	TraesCS3D03G1045000	0.304455
TraesCS2B03G1133600	TraesCS3D03G1153700	0.332764
TraesCS2B03G1133600	TraesCS4A03G0085000	0.343907
TraesCS2B03G1133600	TraesCS4A03G0536600	0.315261
TraesCS2B03G1133600	TraesCS4A03G0683400	0.318673
TraesCS2B03G1133600	TraesCS4A03G1010300	0.338377
TraesCS2B03G1133600	TraesCS4B03G0722900	0.342762
TraesCS2B03G1133600	TraesCS4B03G0799600	0.333964
TraesCS2B03G1133600	TraesCS4B03G0975700	0.33227
TraesCS2B03G1133600	TraesCS4D03G0222900	0.320058
TraesCS2B03G1133600	TraesCS4D03G0434100	0.337194
TraesCS2B03G1133600	TraesCS4D03G0718000	0.336828
TraesCS2B03G1133600	TraesCS5A03G0009300	0.323982
TraesCS2B03G1133600	TraesCS5A03G1289300	0.3317
TraesCS2B03G1133600	TraesCS5B03G0371300	0.30901
TraesCS2B03G1133600	TraesCS5B03G0872400	0.318966
TraesCS2B03G1133600	TraesCS5B03G1136500	0.324779
TraesCS2B03G1133600	TraesCS5B03G1216200	0.339764
TraesCS2B03G1133600	TraesCS5D03G0011500	0.328994
TraesCS2B03G1133600	TraesCS5D03G0011700	0.345848
TraesCS2B03G1133600	TraesCS5D03G0460100	0.317987
TraesCS2B03G1133600	TraesCS5D03G0528000	0.317286
TraesCS2B03G1133600	TraesCS6B03G0366500	0.32855
TraesCS2B03G1133600	TraesCS6B03G0366600	0.308093
TraesCS2B03G1133600	TraesCS6D03G0690500	0.337449
TraesCS2B03G1133600	TraesCS7A03G0769100	0.330004
TraesCS2B03G1133600	TraesCS7B03G0222700	0.340989
TraesCS2B03G1133600	TraesCS7D03G0440800	0.314036
TraesCS2B03G1133600	TraesCS7D03G0548000	0.343486
TraesCS2B03G1133600	TraesCS7D03G1058600	0.335055
TraesCS2B03G1133600	TraesCS7D03G1073000	0.309485
TraesCS2B03G1133600	TraesCSU03G0103400	0.321269
TraesCS2B03G1411400	TraesCS2B03G1489900	0.325867
TraesCS2B03G1411400	TraesCS2D03G0056900	0.320671
TraesCS2B03G1411400	TraesCS2D03G0454600	0.34221
TraesCS2B03G1411400	TraesCS2D03G0906200	0.332014
TraesCS2B03G1411400	TraesCS2D03G1127500	0.339737
TraesCS2B03G1411400	TraesCS3A03G0016400	0.316278
TraesCS2B03G1411400	TraesCS3A03G0032300	0.336076
TraesCS2B03G1411400	TraesCS3A03G0997000	0.334101
TraesCS2B03G1411400	TraesCS3A03G1032900	0.335281
TraesCS2B03G1411400	TraesCS3A03G1049400	0.32997
TraesCS2B03G1411400	TraesCS3A03G1122300	0.329231
TraesCS2B03G1411400	TraesCS3D03G0013700	0.313759
TraesCS2B03G1411400	TraesCS3D03G0606900	0.323766
TraesCS2B03G1411400	TraesCS3D03G0826300	0.309519
TraesCS2B03G1411400	TraesCS3D03G0873600	0.332745
TraesCS2B03G1411400	TraesCS3D03G0953100	0.326856
TraesCS2B03G1411400	TraesCS3D03G1045000	0.310981
TraesCS2B03G1411400	TraesCS3D03G1153700	0.32652
TraesCS2B03G1411400	TraesCS4A03G0085000	0.334107
TraesCS2B03G1411400	TraesCS4A03G0536600	0.315
TraesCS2B03G1411400	TraesCS4A03G0683400	0.319262
TraesCS2B03G1411400	TraesCS4A03G1010300	0.339278
TraesCS2B03G1411400	TraesCS4B03G0722900	0.338294
TraesCS2B03G1411400	TraesCS4B03G0799600	0.33197
TraesCS2B03G1411400	TraesCS4B03G0975700	0.324508
TraesCS2B03G1411400	TraesCS4D03G0222900	0.322024
TraesCS2B03G1411400	TraesCS4D03G0434100	0.336698
TraesCS2B03G1411400	TraesCS4D03G0718000	0.337649
TraesCS2B03G1411400	TraesCS5A03G0009300	0.323671
TraesCS2B03G1411400	TraesCS5A03G1289300	0.323709
TraesCS2B03G1411400	TraesCS5B03G0371300	0.318033
TraesCS2B03G1411400	TraesCS5B03G0872400	0.314455
TraesCS2B03G1411400	TraesCS5B03G1136500	0.327371
TraesCS2B03G1411400	TraesCS5B03G1216200	0.33316
TraesCS2B03G1411400	TraesCS5D03G0011500	0.324289
TraesCS2B03G1411400	TraesCS5D03G0011700	0.337354
TraesCS2B03G1411400	TraesCS5D03G0460100	0.317369
TraesCS2B03G1411400	TraesCS5D03G0528000	0.322546
TraesCS2B03G1411400	TraesCS6B03G0366500	0.323371
TraesCS2B03G1411400	TraesCS6B03G0366600	0.305258
TraesCS2B03G1411400	TraesCS6D03G0690500	0.328561
TraesCS2B03G1411400	TraesCS7A03G0769100	0.328122
TraesCS2B03G1411400	TraesCS7B03G0222700	0.331657
TraesCS2B03G1411400	TraesCS7D03G0440800	0.317386
TraesCS2B03G1411400	TraesCS7D03G0548000	0.331548
TraesCS2B03G1411400	TraesCS7D03G1058600	0.330249
TraesCS2B03G1411400	TraesCS7D03G1073000	0.308804
TraesCS2B03G1411400	TraesCSU03G0103400	0.314742
TraesCS2B03G1489900	TraesCS2D03G0056900	0.32431
TraesCS2B03G1489900	TraesCS2D03G0454600	0.337276
TraesCS2B03G1489900	TraesCS2D03G0906200	0.337124
TraesCS2B03G1489900	TraesCS2D03G1127500	0.340594
TraesCS2B03G1489900	TraesCS3A03G0016400	0.328788
TraesCS2B03G1489900	TraesCS3A03G0032300	0.344902
TraesCS2B03G1489900	TraesCS3A03G0997000	0.344589
TraesCS2B03G1489900	TraesCS3A03G1032900	0.348152
TraesCS2B03G1489900	TraesCS3A03G1049400	0.333997
TraesCS2B03G1489900	TraesCS3A03G1122300	0.328441
TraesCS2B03G1489900	TraesCS3D03G0013700	0.328421
TraesCS2B03G1489900	TraesCS3D03G0606900	0.338628
TraesCS2B03G1489900	TraesCS3D03G0826300	0.32673
TraesCS2B03G1489900	TraesCS3D03G0873600	0.334575
TraesCS2B03G1489900	TraesCS3D03G0953100	0.331766
TraesCS2B03G1489900	TraesCS3D03G1045000	0.305227
TraesCS2B03G1489900	TraesCS3D03G1153700	0.330465
TraesCS2B03G1489900	TraesCS4A03G0085000	0.343133
TraesCS2B03G1489900	TraesCS4A03G0536600	0.321772
TraesCS2B03G1489900	TraesCS4A03G0683400	0.32694
TraesCS2B03G1489900	TraesCS4A03G1010300	0.339088
TraesCS2B03G1489900	TraesCS4B03G0722900	0.339341
TraesCS2B03G1489900	TraesCS4B03G0799600	0.341351
TraesCS2B03G1489900	TraesCS4B03G0975700	0.331269
TraesCS2B03G1489900	TraesCS4D03G0222900	0.323287
TraesCS2B03G1489900	TraesCS4D03G0434100	0.338875
TraesCS2B03G1489900	TraesCS4D03G0718000	0.338856
TraesCS2B03G1489900	TraesCS5A03G0009300	0.327268
TraesCS2B03G1489900	TraesCS5A03G1289300	0.331006
TraesCS2B03G1489900	TraesCS5B03G0371300	0.314668
TraesCS2B03G1489900	TraesCS5B03G0872400	0.327572
TraesCS2B03G1489900	TraesCS5B03G1136500	0.329651
TraesCS2B03G1489900	TraesCS5B03G1216200	0.339898
TraesCS2B03G1489900	TraesCS5D03G0011500	0.334164
TraesCS2B03G1489900	TraesCS5D03G0011700	0.338936
TraesCS2B03G1489900	TraesCS5D03G0460100	0.321381
TraesCS2B03G1489900	TraesCS5D03G0528000	0.31807
TraesCS2B03G1489900	TraesCS6B03G0366500	0.331584
TraesCS2B03G1489900	TraesCS6B03G0366600	0.328201
TraesCS2B03G1489900	TraesCS6D03G0690500	0.334531
TraesCS2B03G1489900	TraesCS7A03G0769100	0.324721
TraesCS2B03G1489900	TraesCS7B03G0222700	0.334075
TraesCS2B03G1489900	TraesCS7D03G0440800	0.317615
TraesCS2B03G1489900	TraesCS7D03G0548000	0.340325
TraesCS2B03G1489900	TraesCS7D03G1058600	0.333365
TraesCS2B03G1489900	TraesCS7D03G1073000	0.327351
TraesCS2B03G1489900	TraesCSU03G0103400	0.32712
TraesCS2D03G0056900	TraesCS2D03G0454600	0.338624
TraesCS2D03G0056900	TraesCS2D03G0906200	0.320718
TraesCS2D03G0056900	TraesCS2D03G1127500	0.32932
TraesCS2D03G0056900	TraesCS3A03G0016400	0.326777
TraesCS2D03G0056900	TraesCS3A03G0032300	0.32921
TraesCS2D03G0056900	TraesCS3A03G0997000	0.326264
TraesCS2D03G0056900	TraesCS3A03G1032900	0.328459
TraesCS2D03G0056900	TraesCS3A03G1049400	0.3308
TraesCS2D03G0056900	TraesCS3A03G1122300	0.323
TraesCS2D03G0056900	TraesCS3D03G0013700	0.325874
TraesCS2D03G0056900	TraesCS3D03G0606900	0.320833
TraesCS2D03G0056900	TraesCS3D03G0826300	0.318659
TraesCS2D03G0056900	TraesCS3D03G0873600	0.323665
TraesCS2D03G0056900	TraesCS3D03G0953100	0.32571
TraesCS2D03G0056900	TraesCS3D03G1045000	0.313102
TraesCS2D03G0056900	TraesCS3D03G1153700	0.328477
TraesCS2D03G0056900	TraesCS4A03G0085000	0.318813
TraesCS2D03G0056900	TraesCS4A03G0536600	0.326918
TraesCS2D03G0056900	TraesCS4A03G0683400	0.316017
TraesCS2D03G0056900	TraesCS4A03G1010300	0.324758
TraesCS2D03G0056900	TraesCS4B03G0722900	0.330337
TraesCS2D03G0056900	TraesCS4B03G0799600	0.314008
TraesCS2D03G0056900	TraesCS4B03G0975700	0.328319
TraesCS2D03G0056900	TraesCS4D03G0222900	0.327607
TraesCS2D03G0056900	TraesCS4D03G0434100	0.324634
TraesCS2D03G0056900	TraesCS4D03G0718000	0.340008
TraesCS2D03G0056900	TraesCS5A03G0009300	0.327038
TraesCS2D03G0056900	TraesCS5A03G1289300	0.331226
TraesCS2D03G0056900	TraesCS5B03G0371300	0.31214
TraesCS2D03G0056900	TraesCS5B03G0872400	0.318093
TraesCS2D03G0056900	TraesCS5B03G1136500	0.323771
TraesCS2D03G0056900	TraesCS5B03G1216200	0.32135
TraesCS2D03G0056900	TraesCS5D03G0011500	0.324074
TraesCS2D03G0056900	TraesCS5D03G0011700	0.334203
TraesCS2D03G0056900	TraesCS5D03G0460100	0.326413
TraesCS2D03G0056900	TraesCS5D03G0528000	0.327744
TraesCS2D03G0056900	TraesCS6B03G0366500	0.329618
TraesCS2D03G0056900	TraesCS6B03G0366600	0.297731
TraesCS2D03G0056900	TraesCS6D03G0690500	0.332131
TraesCS2D03G0056900	TraesCS7A03G0769100	0.335925
TraesCS2D03G0056900	TraesCS7B03G0222700	0.328349
TraesCS2D03G0056900	TraesCS7D03G0440800	0.317742
TraesCS2D03G0056900	TraesCS7D03G0548000	0.3223
TraesCS2D03G0056900	TraesCS7D03G1058600	0.331776
TraesCS2D03G0056900	TraesCS7D03G1073000	0.312583
TraesCS2D03G0056900	TraesCSU03G0103400	0.327722
TraesCS2D03G0454600	TraesCS2D03G0906200	0.320695
TraesCS2D03G0454600	TraesCS2D03G1127500	0.328177
TraesCS2D03G0454600	TraesCS3A03G0016400	0.341593
TraesCS2D03G0454600	TraesCS3A03G0032300	0.337349
TraesCS2D03G0454600	TraesCS3A03G0997000	0.339902
TraesCS2D03G0454600	TraesCS3A03G1032900	0.3405
TraesCS2D03G0454600	TraesCS3A03G1049400	0.338897
TraesCS2D03G0454600	TraesCS3A03G1122300	0.335545
TraesCS2D03G0454600	TraesCS3D03G0013700	0.341829
TraesCS2D03G0454600	TraesCS3D03G0606900	0.335583
TraesCS2D03G0454600	TraesCS3D03G0826300	0.34905
TraesCS2D03G0454600	TraesCS3D03G0873600	0.330179
TraesCS2D03G0454600	TraesCS3D03G0953100	0.337364
TraesCS2D03G0454600	TraesCS3D03G1045000	0.331669
TraesCS2D03G0454600	TraesCS3D03G1153700	0.334966
TraesCS2D03G0454600	TraesCS4A03G0085000	0.322975
TraesCS2D03G0454600	TraesCS4A03G0536600	0.350083
TraesCS2D03G0454600	TraesCS4A03G0683400	0.337261
TraesCS2D03G0454600	TraesCS4A03G1010300	0.326699
TraesCS2D03G0454600	TraesCS4B03G0722900	0.343563
TraesCS2D03G0454600	TraesCS4B03G0799600	0.332561
TraesCS2D03G0454600	TraesCS4B03G0975700	0.335738
TraesCS2D03G0454600	TraesCS4D03G0222900	0.344625
TraesCS2D03G0454600	TraesCS4D03G0434100	0.340006
TraesCS2D03G0454600	TraesCS4D03G0718000	0.342035
TraesCS2D03G0454600	TraesCS5A03G0009300	0.342711
TraesCS2D03G0454600	TraesCS5A03G1289300	0.339032
TraesCS2D03G0454600	TraesCS5B03G0371300	0.324532
TraesCS2D03G0454600	TraesCS5B03G0872400	0.335604
TraesCS2D03G0454600	TraesCS5B03G1136500	0.343703
TraesCS2D03G0454600	TraesCS5B03G1216200	0.336106
TraesCS2D03G0454600	TraesCS5D03G0011500	0.33584
TraesCS2D03G0454600	TraesCS5D03G0011700	0.34004
TraesCS2D03G0454600	TraesCS5D03G0460100	0.34077
TraesCS2D03G0454600	TraesCS5D03G0528000	0.33264
TraesCS2D03G0454600	TraesCS6B03G0366500	0.343416
TraesCS2D03G0454600	TraesCS6B03G0366600	0.326204
TraesCS2D03G0454600	TraesCS6D03G0690500	0.34235
TraesCS2D03G0454600	TraesCS7A03G0769100	0.327728
TraesCS2D03G0454600	TraesCS7B03G0222700	0.33374
TraesCS2D03G0454600	TraesCS7D03G0440800	0.32004
TraesCS2D03G0454600	TraesCS7D03G0548000	0.329373
TraesCS2D03G0454600	TraesCS7D03G1058600	0.344408
TraesCS2D03G0454600	TraesCS7D03G1073000	0.344758
TraesCS2D03G0454600	TraesCSU03G0103400	0.342725
TraesCS2D03G0906200	TraesCS2D03G1127500	0.332214
TraesCS2D03G0906200	TraesCS3A03G0016400	0.338144
TraesCS2D03G0906200	TraesCS3A03G0032300	0.337915
TraesCS2D03G0906200	TraesCS3A03G0997000	0.336002
TraesCS2D03G0906200	TraesCS3A03G1032900	0.338533
TraesCS2D03G0906200	TraesCS3A03G1049400	0.3364
TraesCS2D03G0906200	TraesCS3A03G1122300	0.325242
TraesCS2D03G0906200	TraesCS3D03G0013700	0.340028
TraesCS2D03G0906200	TraesCS3D03G0606900	0.342545
TraesCS2D03G0906200	TraesCS3D03G0826300	0.325422
TraesCS2D03G0906200	TraesCS3D03G0873600	0.333692
TraesCS2D03G0906200	TraesCS3D03G0953100	0.340306
TraesCS2D03G0906200	TraesCS3D03G1045000	0.297806
TraesCS2D03G0906200	TraesCS3D03G1153700	0.327985
TraesCS2D03G0906200	TraesCS4A03G0085000	0.330644
TraesCS2D03G0906200	TraesCS4A03G0536600	0.318387
TraesCS2D03G0906200	TraesCS4A03G0683400	0.33238
TraesCS2D03G0906200	TraesCS4A03G1010300	0.324687
TraesCS2D03G0906200	TraesCS4B03G0722900	0.330628
TraesCS2D03G0906200	TraesCS4B03G0799600	0.326014
TraesCS2D03G0906200	TraesCS4B03G0975700	0.337689
TraesCS2D03G0906200	TraesCS4D03G0222900	0.319556
TraesCS2D03G0906200	TraesCS4D03G0434100	0.324814
TraesCS2D03G0906200	TraesCS4D03G0718000	0.326575
TraesCS2D03G0906200	TraesCS5A03G0009300	0.330781
TraesCS2D03G0906200	TraesCS5A03G1289300	0.334135
TraesCS2D03G0906200	TraesCS5B03G0371300	0.301663
TraesCS2D03G0906200	TraesCS5B03G0872400	0.337276
TraesCS2D03G0906200	TraesCS5B03G1136500	0.325601
TraesCS2D03G0906200	TraesCS5B03G1216200	0.33009
TraesCS2D03G0906200	TraesCS5D03G0011500	0.344535
TraesCS2D03G0906200	TraesCS5D03G0011700	0.331894
TraesCS2D03G0906200	TraesCS5D03G0460100	0.323133
TraesCS2D03G0906200	TraesCS5D03G0528000	0.306117
TraesCS2D03G0906200	TraesCS6B03G0366500	0.333775
TraesCS2D03G0906200	TraesCS6B03G0366600	0.33316
TraesCS2D03G0906200	TraesCS6D03G0690500	0.339292
TraesCS2D03G0906200	TraesCS7A03G0769100	0.318292
TraesCS2D03G0906200	TraesCS7B03G0222700	0.335751
TraesCS2D03G0906200	TraesCS7D03G0440800	0.308456
TraesCS2D03G0906200	TraesCS7D03G0548000	0.335963
TraesCS2D03G0906200	TraesCS7D03G1058600	0.335401
TraesCS2D03G0906200	TraesCS7D03G1073000	0.326724
TraesCS2D03G0906200	TraesCSU03G0103400	0.335235
TraesCS2D03G1127500	TraesCS3A03G0016400	0.337952
TraesCS2D03G1127500	TraesCS3A03G0032300	0.342393
TraesCS2D03G1127500	TraesCS3A03G0997000	0.343384
TraesCS2D03G1127500	TraesCS3A03G1032900	0.34437
TraesCS2D03G1127500	TraesCS3A03G1049400	0.33673
TraesCS2D03G1127500	TraesCS3A03G1122300	0.333853
TraesCS2D03G1127500	TraesCS3D03G0013700	0.339869
TraesCS2D03G1127500	TraesCS3D03G0606900	0.344816
TraesCS2D03G1127500	TraesCS3D03G0826300	0.337617
TraesCS2D03G1127500	TraesCS3D03G0873600	0.337396
TraesCS2D03G1127500	TraesCS3D03G0953100	0.33977
TraesCS2D03G1127500	TraesCS3D03G1045000	0.319311
TraesCS2D03G1127500	TraesCS3D03G1153700	0.331141
TraesCS2D03G1127500	TraesCS4A03G0085000	0.336002
TraesCS2D03G1127500	TraesCS4A03G0536600	0.331531
TraesCS2D03G1127500	TraesCS4A03G0683400	0.338233
TraesCS2D03G1127500	TraesCS4A03G1010300	0.325153
TraesCS2D03G1127500	TraesCS4B03G0722900	0.341908
TraesCS2D03G1127500	TraesCS4B03G0799600	0.332072
TraesCS2D03G1127500	TraesCS4B03G0975700	0.336448
TraesCS2D03G1127500	TraesCS4D03G0222900	0.330894
TraesCS2D03G1127500	TraesCS4D03G0434100	0.3343
TraesCS2D03G1127500	TraesCS4D03G0718000	0.320885
TraesCS2D03G1127500	TraesCS5A03G0009300	0.337618
TraesCS2D03G1127500	TraesCS5A03G1289300	0.334517
TraesCS2D03G1127500	TraesCS5B03G0371300	0.309255
TraesCS2D03G1127500	TraesCS5B03G0872400	0.338537
TraesCS2D03G1127500	TraesCS5B03G1136500	0.336182
TraesCS2D03G1127500	TraesCS5B03G1216200	0.338126
TraesCS2D03G1127500	TraesCS5D03G0011500	0.340418
TraesCS2D03G1127500	TraesCS5D03G0011700	0.340307
TraesCS2D03G1127500	TraesCS5D03G0460100	0.330821
TraesCS2D03G1127500	TraesCS5D03G0528000	0.319518
TraesCS2D03G1127500	TraesCS6B03G0366500	0.337182
TraesCS2D03G1127500	TraesCS6B03G0366600	0.336061
TraesCS2D03G1127500	TraesCS6D03G0690500	0.344394
TraesCS2D03G1127500	TraesCS7A03G0769100	0.321307
TraesCS2D03G1127500	TraesCS7B03G0222700	0.337496
TraesCS2D03G1127500	TraesCS7D03G0440800	0.314765
TraesCS2D03G1127500	TraesCS7D03G0548000	0.339146
TraesCS2D03G1127500	TraesCS7D03G1058600	0.340114
TraesCS2D03G1127500	TraesCS7D03G1073000	0.336556
TraesCS2D03G1127500	TraesCSU03G0103400	0.338126
TraesCS3A03G0016400	TraesCS3A03G0032300	0.347021
TraesCS3A03G0016400	TraesCS3A03G0997000	0.343297
TraesCS3A03G0016400	TraesCS3A03G1032900	0.347071
TraesCS3A03G0016400	TraesCS3A03G1049400	0.333844
TraesCS3A03G0016400	TraesCS3A03G1122300	0.325957
TraesCS3A03G0016400	TraesCS3D03G0013700	0.323622
TraesCS3A03G0016400	TraesCS3D03G0606900	0.330592
TraesCS3A03G0016400	TraesCS3D03G0826300	0.312561
TraesCS3A03G0016400	TraesCS3D03G0873600	0.336712
TraesCS3A03G0016400	TraesCS3D03G0953100	0.329974
TraesCS3A03G0016400	TraesCS3D03G1045000	0.304072
TraesCS3A03G0016400	TraesCS3D03G1153700	0.336172
TraesCS3A03G0016400	TraesCS4A03G0085000	0.338735
TraesCS3A03G0016400	TraesCS4A03G0536600	0.315204
TraesCS3A03G0016400	TraesCS4A03G0683400	0.314023
TraesCS3A03G0016400	TraesCS4A03G1010300	0.333667
TraesCS3A03G0016400	TraesCS4B03G0722900	0.340709
TraesCS3A03G0016400	TraesCS4B03G0799600	0.328741
TraesCS3A03G0016400	TraesCS4B03G0975700	0.331135
TraesCS3A03G0016400	TraesCS4D03G0222900	0.322214
TraesCS3A03G0016400	TraesCS4D03G0434100	0.334875
TraesCS3A03G0016400	TraesCS4D03G0718000	0.340752
TraesCS3A03G0016400	TraesCS5A03G0009300	0.321888
TraesCS3A03G0016400	TraesCS5A03G1289300	0.334319
TraesCS3A03G0016400	TraesCS5B03G0371300	0.305589
TraesCS3A03G0016400	TraesCS5B03G0872400	0.317157
TraesCS3A03G0016400	TraesCS5B03G1136500	0.321982
TraesCS3A03G0016400	TraesCS5B03G1216200	0.334873
TraesCS3A03G0016400	TraesCS5D03G0011500	0.330665
TraesCS3A03G0016400	TraesCS5D03G0011700	0.34688
TraesCS3A03G0016400	TraesCS5D03G0460100	0.320255
TraesCS3A03G0016400	TraesCS5D03G0528000	0.32175
TraesCS3A03G0016400	TraesCS6B03G0366500	0.330087
TraesCS3A03G0016400	TraesCS6B03G0366600	0.304242
TraesCS3A03G0016400	TraesCS6D03G0690500	0.336088
TraesCS3A03G0016400	TraesCS7A03G0769100	0.335449
TraesCS3A03G0016400	TraesCS7B03G0222700	0.339554
TraesCS3A03G0016400	TraesCS7D03G0440800	0.315452
TraesCS3A03G0016400	TraesCS7D03G0548000	0.341234
TraesCS3A03G0016400	TraesCS7D03G1058600	0.331758
TraesCS3A03G0016400	TraesCS7D03G1073000	0.311069
TraesCS3A03G0016400	TraesCSU03G0103400	0.322161
TraesCS3A03G0032300	TraesCS3A03G0997000	0.341382
TraesCS3A03G0032300	TraesCS3A03G1032900	0.342381
TraesCS3A03G0032300	TraesCS3A03G1049400	0.345946
TraesCS3A03G0032300	TraesCS3A03G1122300	0.329658
TraesCS3A03G0032300	TraesCS3D03G0013700	0.347268
TraesCS3A03G0032300	TraesCS3D03G0606900	0.343738
TraesCS3A03G0032300	TraesCS3D03G0826300	0.335959
TraesCS3A03G0032300	TraesCS3D03G0873600	0.338742
TraesCS3A03G0032300	TraesCS3D03G0953100	0.347948
TraesCS3A03G0032300	TraesCS3D03G1045000	0.300697
TraesCS3A03G0032300	TraesCS3D03G1153700	0.337431
TraesCS3A03G0032300	TraesCS4A03G0085000	0.337767
TraesCS3A03G0032300	TraesCS4A03G0536600	0.328794
TraesCS3A03G0032300	TraesCS4A03G0683400	0.33696
TraesCS3A03G0032300	TraesCS4A03G1010300	0.336713
TraesCS3A03G0032300	TraesCS4B03G0722900	0.33973
TraesCS3A03G0032300	TraesCS4B03G0799600	0.336595
TraesCS3A03G0032300	TraesCS4B03G0975700	0.345479
TraesCS3A03G0032300	TraesCS4D03G0222900	0.329417
TraesCS3A03G0032300	TraesCS4D03G0434100	0.335472
TraesCS3A03G0032300	TraesCS4D03G0718000	0.343626
TraesCS3A03G0032300	TraesCS5A03G0009300	0.337249
TraesCS3A03G0032300	TraesCS5A03G1289300	0.344775
TraesCS3A03G0032300	TraesCS5B03G0371300	0.307559
TraesCS3A03G0032300	TraesCS5B03G0872400	0.340961
TraesCS3A03G0032300	TraesCS5B03G1136500	0.332198
TraesCS3A03G0032300	TraesCS5B03G1216200	0.339141
TraesCS3A03G0032300	TraesCS5D03G0011500	0.352082
TraesCS3A03G0032300	TraesCS5D03G0011700	0.3406
TraesCS3A03G0032300	TraesCS5D03G0460100	0.332342
TraesCS3A03G0032300	TraesCS5D03G0528000	0.320514
TraesCS3A03G0032300	TraesCS6B03G0366500	0.343233
TraesCS3A03G0032300	TraesCS6B03G0366600	0.335013
TraesCS3A03G0032300	TraesCS6D03G0690500	0.348826
TraesCS3A03G0032300	TraesCS7A03G0769100	0.332948
TraesCS3A03G0032300	TraesCS7B03G0222700	0.342958
TraesCS3A03G0032300	TraesCS7D03G0440800	0.320537
TraesCS3A03G0032300	TraesCS7D03G0548000	0.336992
TraesCS3A03G0032300	TraesCS7D03G1058600	0.346168
TraesCS3A03G0032300	TraesCS7D03G1073000	0.336329
TraesCS3A03G0032300	TraesCSU03G0103400	0.342403
TraesCS3A03G0997000	TraesCS3A03G1032900	0.346946
TraesCS3A03G0997000	TraesCS3A03G1049400	0.344363
TraesCS3A03G0997000	TraesCS3A03G1122300	0.325428
TraesCS3A03G0997000	TraesCS3D03G0013700	0.343805
TraesCS3A03G0997000	TraesCS3D03G0606900	0.348571
TraesCS3A03G0997000	TraesCS3D03G0826300	0.340257
TraesCS3A03G0997000	TraesCS3D03G0873600	0.335523
TraesCS3A03G0997000	TraesCS3D03G0953100	0.348015
TraesCS3A03G0997000	TraesCS3D03G1045000	0.296764
TraesCS3A03G0997000	TraesCS3D03G1153700	0.334818
TraesCS3A03G0997000	TraesCS4A03G0085000	0.338831
TraesCS3A03G0997000	TraesCS4A03G0536600	0.330149
TraesCS3A03G0997000	TraesCS4A03G0683400	0.33484
TraesCS3A03G0997000	TraesCS4A03G1010300	0.338048
TraesCS3A03G0997000	TraesCS4B03G0722900	0.341161
TraesCS3A03G0997000	TraesCS4B03G0799600	0.341322
TraesCS3A03G0997000	TraesCS4B03G0975700	0.341932
TraesCS3A03G0997000	TraesCS4D03G0222900	0.326166
TraesCS3A03G0997000	TraesCS4D03G0434100	0.339526
TraesCS3A03G0997000	TraesCS4D03G0718000	0.343927
TraesCS3A03G0997000	TraesCS5A03G0009300	0.333651
TraesCS3A03G0997000	TraesCS5A03G1289300	0.34152
TraesCS3A03G0997000	TraesCS5B03G0371300	0.306357
TraesCS3A03G0997000	TraesCS5B03G0872400	0.3369
TraesCS3A03G0997000	TraesCS5B03G1136500	0.330479
TraesCS3A03G0997000	TraesCS5B03G1216200	0.340027
TraesCS3A03G0997000	TraesCS5D03G0011500	0.35229
TraesCS3A03G0997000	TraesCS5D03G0011700	0.339418
TraesCS3A03G0997000	TraesCS5D03G0460100	0.326889
TraesCS3A03G0997000	TraesCS5D03G0528000	0.318595
TraesCS3A03G0997000	TraesCS6B03G0366500	0.340956
TraesCS3A03G0997000	TraesCS6B03G0366600	0.335278
TraesCS3A03G0997000	TraesCS6D03G0690500	0.348128
TraesCS3A03G0997000	TraesCS7A03G0769100	0.328915
TraesCS3A03G0997000	TraesCS7B03G0222700	0.340359
TraesCS3A03G0997000	TraesCS7D03G0440800	0.315361
TraesCS3A03G0997000	TraesCS7D03G0548000	0.336044
TraesCS3A03G0997000	TraesCS7D03G1058600	0.347359
TraesCS3A03G0997000	TraesCS7D03G1073000	0.341284
TraesCS3A03G0997000	TraesCSU03G0103400	0.338319
TraesCS3A03G1032900	TraesCS3A03G1049400	0.347907
TraesCS3A03G1032900	TraesCS3A03G1122300	0.32909
TraesCS3A03G1032900	TraesCS3D03G0013700	0.346627
TraesCS3A03G1032900	TraesCS3D03G0606900	0.349017
TraesCS3A03G1032900	TraesCS3D03G0826300	0.340872
TraesCS3A03G1032900	TraesCS3D03G0873600	0.33971
TraesCS3A03G1032900	TraesCS3D03G0953100	0.350521
TraesCS3A03G1032900	TraesCS3D03G1045000	0.298853
TraesCS3A03G1032900	TraesCS3D03G1153700	0.337235
TraesCS3A03G1032900	TraesCS4A03G0085000	0.340217
TraesCS3A03G1032900	TraesCS4A03G0536600	0.330239
TraesCS3A03G1032900	TraesCS4A03G0683400	0.337537
TraesCS3A03G1032900	TraesCS4A03G1010300	0.339771
TraesCS3A03G1032900	TraesCS4B03G0722900	0.344178
TraesCS3A03G1032900	TraesCS4B03G0799600	0.339761
TraesCS3A03G1032900	TraesCS4B03G0975700	0.346002
TraesCS3A03G1032900	TraesCS4D03G0222900	0.330251
TraesCS3A03G1032900	TraesCS4D03G0434100	0.339045
TraesCS3A03G1032900	TraesCS4D03G0718000	0.34497
TraesCS3A03G1032900	TraesCS5A03G0009300	0.336826
TraesCS3A03G1032900	TraesCS5A03G1289300	0.346286
TraesCS3A03G1032900	TraesCS5B03G0371300	0.306172
TraesCS3A03G1032900	TraesCS5B03G0872400	0.339462
TraesCS3A03G1032900	TraesCS5B03G1136500	0.332506
TraesCS3A03G1032900	TraesCS5B03G1216200	0.343543
TraesCS3A03G1032900	TraesCS5D03G0011500	0.354261
TraesCS3A03G1032900	TraesCS5D03G0011700	0.342907
TraesCS3A03G1032900	TraesCS5D03G0460100	0.332423
TraesCS3A03G1032900	TraesCS5D03G0528000	0.320001
TraesCS3A03G1032900	TraesCS6B03G0366500	0.34412
TraesCS3A03G1032900	TraesCS6B03G0366600	0.336597
TraesCS3A03G1032900	TraesCS6D03G0690500	0.352222
TraesCS3A03G1032900	TraesCS7A03G0769100	0.33227
TraesCS3A03G1032900	TraesCS7B03G0222700	0.344364
TraesCS3A03G1032900	TraesCS7D03G0440800	0.320801
TraesCS3A03G1032900	TraesCS7D03G0548000	0.339322
TraesCS3A03G1032900	TraesCS7D03G1058600	0.350295
TraesCS3A03G1032900	TraesCS7D03G1073000	0.341165
TraesCS3A03G1032900	TraesCSU03G0103400	0.341388
TraesCS3A03G1049400	TraesCS3A03G1122300	0.327978
TraesCS3A03G1049400	TraesCS3D03G0013700	0.335526
TraesCS3A03G1049400	TraesCS3D03G0606900	0.337657
TraesCS3A03G1049400	TraesCS3D03G0826300	0.329208
TraesCS3A03G1049400	TraesCS3D03G0873600	0.334498
TraesCS3A03G1049400	TraesCS3D03G0953100	0.334565
TraesCS3A03G1049400	TraesCS3D03G1045000	0.308671
TraesCS3A03G1049400	TraesCS3D03G1153700	0.334566
TraesCS3A03G1049400	TraesCS4A03G0085000	0.339841
TraesCS3A03G1049400	TraesCS4A03G0536600	0.328027
TraesCS3A03G1049400	TraesCS4A03G0683400	0.327424
TraesCS3A03G1049400	TraesCS4A03G1010300	0.334653
TraesCS3A03G1049400	TraesCS4B03G0722900	0.340144
TraesCS3A03G1049400	TraesCS4B03G0799600	0.336529
TraesCS3A03G1049400	TraesCS4B03G0975700	0.330555
TraesCS3A03G1049400	TraesCS4D03G0222900	0.327717
TraesCS3A03G1049400	TraesCS4D03G0434100	0.336453
TraesCS3A03G1049400	TraesCS4D03G0718000	0.344925
TraesCS3A03G1049400	TraesCS5A03G0009300	0.327992
TraesCS3A03G1049400	TraesCS5A03G1289300	0.33354
TraesCS3A03G1049400	TraesCS5B03G0371300	0.314153
TraesCS3A03G1049400	TraesCS5B03G0872400	0.32992
TraesCS3A03G1049400	TraesCS5B03G1136500	0.329954
TraesCS3A03G1049400	TraesCS5B03G1216200	0.337671
TraesCS3A03G1049400	TraesCS5D03G0011500	0.336651
TraesCS3A03G1049400	TraesCS5D03G0011700	0.343095
TraesCS3A03G1049400	TraesCS5D03G0460100	0.325125
TraesCS3A03G1049400	TraesCS5D03G0528000	0.325541
TraesCS3A03G1049400	TraesCS6B03G0366500	0.334569
TraesCS3A03G1049400	TraesCS6B03G0366600	0.323479
TraesCS3A03G1049400	TraesCS6D03G0690500	0.339916
TraesCS3A03G1049400	TraesCS7A03G0769100	0.331193
TraesCS3A03G1049400	TraesCS7B03G0222700	0.336378
TraesCS3A03G1049400	TraesCS7D03G0440800	0.318311
TraesCS3A03G1049400	TraesCS7D03G0548000	0.339828
TraesCS3A03G1049400	TraesCS7D03G1058600	0.335091
TraesCS3A03G1049400	TraesCS7D03G1073000	0.329998
TraesCS3A03G1049400	TraesCSU03G0103400	0.332001
TraesCS3A03G1122300	TraesCS3D03G0013700	0.328292
TraesCS3A03G1122300	TraesCS3D03G0606900	0.324174
TraesCS3A03G1122300	TraesCS3D03G0826300	0.323471
TraesCS3A03G1122300	TraesCS3D03G0873600	0.324709
TraesCS3A03G1122300	TraesCS3D03G0953100	0.328958
TraesCS3A03G1122300	TraesCS3D03G1045000	0.315969
TraesCS3A03G1122300	TraesCS3D03G1153700	0.322595
TraesCS3A03G1122300	TraesCS4A03G0085000	0.32541
TraesCS3A03G1122300	TraesCS4A03G0536600	0.326999
TraesCS3A03G1122300	TraesCS4A03G0683400	0.323844
TraesCS3A03G1122300	TraesCS4A03G1010300	0.330754
TraesCS3A03G1122300	TraesCS4B03G0722900	0.328649
TraesCS3A03G1122300	TraesCS4B03G0799600	0.318092
TraesCS3A03G1122300	TraesCS4B03G0975700	0.324402
TraesCS3A03G1122300	TraesCS4D03G0222900	0.323443
TraesCS3A03G1122300	TraesCS4D03G0434100	0.325459
TraesCS3A03G1122300	TraesCS4D03G0718000	0.333624
TraesCS3A03G1122300	TraesCS5A03G0009300	0.327344
TraesCS3A03G1122300	TraesCS5A03G1289300	0.322667
TraesCS3A03G1122300	TraesCS5B03G0371300	0.322812
TraesCS3A03G1122300	TraesCS5B03G0872400	0.325657
TraesCS3A03G1122300	TraesCS5B03G1136500	0.325586
TraesCS3A03G1122300	TraesCS5B03G1216200	0.323121
TraesCS3A03G1122300	TraesCS5D03G0011500	0.326614
TraesCS3A03G1122300	TraesCS5D03G0011700	0.331525
TraesCS3A03G1122300	TraesCS5D03G0460100	0.322981
TraesCS3A03G1122300	TraesCS5D03G0528000	0.325202
TraesCS3A03G1122300	TraesCS6B03G0366500	0.324259
TraesCS3A03G1122300	TraesCS6B03G0366600	0.315404
TraesCS3A03G1122300	TraesCS6D03G0690500	0.332247
TraesCS3A03G1122300	TraesCS7A03G0769100	0.327914
TraesCS3A03G1122300	TraesCS7B03G0222700	0.325691
TraesCS3A03G1122300	TraesCS7D03G0440800	0.318618
TraesCS3A03G1122300	TraesCS7D03G0548000	0.324929
TraesCS3A03G1122300	TraesCS7D03G1058600	0.330288
TraesCS3A03G1122300	TraesCS7D03G1073000	0.321218
TraesCS3A03G1122300	TraesCSU03G0103400	0.328398
TraesCS3D03G0013700	TraesCS3D03G0606900	0.332692
TraesCS3D03G0013700	TraesCS3D03G0826300	0.309479
TraesCS3D03G0013700	TraesCS3D03G0873600	0.338994
TraesCS3D03G0013700	TraesCS3D03G0953100	0.329725
TraesCS3D03G0013700	TraesCS3D03G1045000	0.303705
TraesCS3D03G0013700	TraesCS3D03G1153700	0.335825
TraesCS3D03G0013700	TraesCS4A03G0085000	0.340973
TraesCS3D03G0013700	TraesCS4A03G0536600	0.314192
TraesCS3D03G0013700	TraesCS4A03G0683400	0.314947
TraesCS3D03G0013700	TraesCS4A03G1010300	0.335853
TraesCS3D03G0013700	TraesCS4B03G0722900	0.341944
TraesCS3D03G0013700	TraesCS4B03G0799600	0.331432
TraesCS3D03G0013700	TraesCS4B03G0975700	0.332512
TraesCS3D03G0013700	TraesCS4D03G0222900	0.322593
TraesCS3D03G0013700	TraesCS4D03G0434100	0.336409
TraesCS3D03G0013700	TraesCS4D03G0718000	0.340131
TraesCS3D03G0013700	TraesCS5A03G0009300	0.32408
TraesCS3D03G0013700	TraesCS5A03G1289300	0.334082
TraesCS3D03G0013700	TraesCS5B03G0371300	0.306104
TraesCS3D03G0013700	TraesCS5B03G0872400	0.315211
TraesCS3D03G0013700	TraesCS5B03G1136500	0.324489
TraesCS3D03G0013700	TraesCS5B03G1216200	0.33699
TraesCS3D03G0013700	TraesCS5D03G0011500	0.330257
TraesCS3D03G0013700	TraesCS5D03G0011700	0.347022
TraesCS3D03G0013700	TraesCS5D03G0460100	0.320492
TraesCS3D03G0013700	TraesCS5D03G0528000	0.321298
TraesCS3D03G0013700	TraesCS6B03G0366500	0.330607
TraesCS3D03G0013700	TraesCS6B03G0366600	0.303614
TraesCS3D03G0013700	TraesCS6D03G0690500	0.335393
TraesCS3D03G0013700	TraesCS7A03G0769100	0.334388
TraesCS3D03G0013700	TraesCS7B03G0222700	0.340836
TraesCS3D03G0013700	TraesCS7D03G0440800	0.31557
TraesCS3D03G0013700	TraesCS7D03G0548000	0.342353
TraesCS3D03G0013700	TraesCS7D03G1058600	0.333576
TraesCS3D03G0013700	TraesCS7D03G1073000	0.307823
TraesCS3D03G0013700	TraesCSU03G0103400	0.320562
TraesCS3D03G0606900	TraesCS3D03G0826300	0.325751
TraesCS3D03G0606900	TraesCS3D03G0873600	0.339626
TraesCS3D03G0606900	TraesCS3D03G0953100	0.341711
TraesCS3D03G0606900	TraesCS3D03G1045000	0.289248
TraesCS3D03G0606900	TraesCS3D03G1153700	0.332801
TraesCS3D03G0606900	TraesCS4A03G0085000	0.346965
TraesCS3D03G0606900	TraesCS4A03G0536600	0.312709
TraesCS3D03G0606900	TraesCS4A03G0683400	0.326685
TraesCS3D03G0606900	TraesCS4A03G1010300	0.340142
TraesCS3D03G0606900	TraesCS4B03G0722900	0.342535
TraesCS3D03G0606900	TraesCS4B03G0799600	0.345621
TraesCS3D03G0606900	TraesCS4B03G0975700	0.335593
TraesCS3D03G0606900	TraesCS4D03G0222900	0.316476
TraesCS3D03G0606900	TraesCS4D03G0434100	0.340097
TraesCS3D03G0606900	TraesCS4D03G0718000	0.337479
TraesCS3D03G0606900	TraesCS5A03G0009300	0.323079
TraesCS3D03G0606900	TraesCS5A03G1289300	0.335272
TraesCS3D03G0606900	TraesCS5B03G0371300	0.300794
TraesCS3D03G0606900	TraesCS5B03G0872400	0.32859
TraesCS3D03G0606900	TraesCS5B03G1136500	0.323891
TraesCS3D03G0606900	TraesCS5B03G1216200	0.34298
TraesCS3D03G0606900	TraesCS5D03G0011500	0.347133
TraesCS3D03G0606900	TraesCS5D03G0011700	0.341158
TraesCS3D03G0606900	TraesCS5D03G0460100	0.316092
TraesCS3D03G0606900	TraesCS5D03G0528000	0.309201
TraesCS3D03G0606900	TraesCS6B03G0366500	0.333202
TraesCS3D03G0606900	TraesCS6B03G0366600	0.333939
TraesCS3D03G0606900	TraesCS6D03G0690500	0.340331
TraesCS3D03G0606900	TraesCS7A03G0769100	0.322431
TraesCS3D03G0606900	TraesCS7B03G0222700	0.341582
TraesCS3D03G0606900	TraesCS7D03G0440800	0.310403
TraesCS3D03G0606900	TraesCS7D03G0548000	0.342197
TraesCS3D03G0606900	TraesCS7D03G1058600	0.336961
TraesCS3D03G0606900	TraesCS7D03G1073000	0.330664
TraesCS3D03G0606900	TraesCSU03G0103400	0.325405
TraesCS3D03G0826300	TraesCS3D03G0873600	0.327013
TraesCS3D03G0826300	TraesCS3D03G0953100	0.327108
TraesCS3D03G0826300	TraesCS3D03G1045000	0.304106
TraesCS3D03G0826300	TraesCS3D03G1153700	0.324431
TraesCS3D03G0826300	TraesCS4A03G0085000	0.331122
TraesCS3D03G0826300	TraesCS4A03G0536600	0.316956
TraesCS3D03G0826300	TraesCS4A03G0683400	0.314974
TraesCS3D03G0826300	TraesCS4A03G1010300	0.340245
TraesCS3D03G0826300	TraesCS4B03G0722900	0.343716
TraesCS3D03G0826300	TraesCS4B03G0799600	0.336303
TraesCS3D03G0826300	TraesCS4B03G0975700	0.320284
TraesCS3D03G0826300	TraesCS4D03G0222900	0.323325
TraesCS3D03G0826300	TraesCS4D03G0434100	0.343755
TraesCS3D03G0826300	TraesCS4D03G0718000	0.340568
TraesCS3D03G0826300	TraesCS5A03G0009300	0.319122
TraesCS3D03G0826300	TraesCS5A03G1289300	0.323586
TraesCS3D03G0826300	TraesCS5B03G0371300	0.31011
TraesCS3D03G0826300	TraesCS5B03G0872400	0.30533
TraesCS3D03G0826300	TraesCS5B03G1136500	0.32557
TraesCS3D03G0826300	TraesCS5B03G1216200	0.336158
TraesCS3D03G0826300	TraesCS5D03G0011500	0.323611
TraesCS3D03G0826300	TraesCS5D03G0011700	0.337254
TraesCS3D03G0826300	TraesCS5D03G0460100	0.315369
TraesCS3D03G0826300	TraesCS5D03G0528000	0.323051
TraesCS3D03G0826300	TraesCS6B03G0366500	0.322882
TraesCS3D03G0826300	TraesCS6B03G0366600	0.301253
TraesCS3D03G0826300	TraesCS6D03G0690500	0.328861
TraesCS3D03G0826300	TraesCS7A03G0769100	0.325487
TraesCS3D03G0826300	TraesCS7B03G0222700	0.328405
TraesCS3D03G0826300	TraesCS7D03G0440800	0.314497
TraesCS3D03G0826300	TraesCS7D03G0548000	0.327875
TraesCS3D03G0826300	TraesCS7D03G1058600	0.334258
TraesCS3D03G0826300	TraesCS7D03G1073000	0.315864
TraesCS3D03G0826300	TraesCSU03G0103400	0.309317
TraesCS3D03G0873600	TraesCS3D03G0953100	0.338335
TraesCS3D03G0873600	TraesCS3D03G1045000	0.301195
TraesCS3D03G0873600	TraesCS3D03G1153700	0.329615
TraesCS3D03G0873600	TraesCS4A03G0085000	0.337022
TraesCS3D03G0873600	TraesCS4A03G0536600	0.322334
TraesCS3D03G0873600	TraesCS4A03G0683400	0.331758
TraesCS3D03G0873600	TraesCS4A03G1010300	0.3312
TraesCS3D03G0873600	TraesCS4B03G0722900	0.32932
TraesCS3D03G0873600	TraesCS4B03G0799600	0.330284
TraesCS3D03G0873600	TraesCS4B03G0975700	0.334831
TraesCS3D03G0873600	TraesCS4D03G0222900	0.320455
TraesCS3D03G0873600	TraesCS4D03G0434100	0.328426
TraesCS3D03G0873600	TraesCS4D03G0718000	0.335545
TraesCS3D03G0873600	TraesCS5A03G0009300	0.330512
TraesCS3D03G0873600	TraesCS5A03G1289300	0.331657
TraesCS3D03G0873600	TraesCS5B03G0371300	0.31069
TraesCS3D03G0873600	TraesCS5B03G0872400	0.335839
TraesCS3D03G0873600	TraesCS5B03G1136500	0.326103
TraesCS3D03G0873600	TraesCS5B03G1216200	0.329391
TraesCS3D03G0873600	TraesCS5D03G0011500	0.341993
TraesCS3D03G0873600	TraesCS5D03G0011700	0.333951
TraesCS3D03G0873600	TraesCS5D03G0460100	0.322977
TraesCS3D03G0873600	TraesCS5D03G0528000	0.316599
TraesCS3D03G0873600	TraesCS6B03G0366500	0.332408
TraesCS3D03G0873600	TraesCS6B03G0366600	0.331214
TraesCS3D03G0873600	TraesCS6D03G0690500	0.338831
TraesCS3D03G0873600	TraesCS7A03G0769100	0.326242
TraesCS3D03G0873600	TraesCS7B03G0222700	0.331478
TraesCS3D03G0873600	TraesCS7D03G0440800	0.31587
TraesCS3D03G0873600	TraesCS7D03G0548000	0.335713
TraesCS3D03G0873600	TraesCS7D03G1058600	0.334054
TraesCS3D03G0873600	TraesCS7D03G1073000	0.328355
TraesCS3D03G0873600	TraesCSU03G0103400	0.334663
TraesCS3D03G0953100	TraesCS3D03G1045000	0.306279
TraesCS3D03G0953100	TraesCS3D03G1153700	0.331445
TraesCS3D03G0953100	TraesCS4A03G0085000	0.346033
TraesCS3D03G0953100	TraesCS4A03G0536600	0.323671
TraesCS3D03G0953100	TraesCS4A03G0683400	0.326911
TraesCS3D03G0953100	TraesCS4A03G1010300	0.338776
TraesCS3D03G0953100	TraesCS4B03G0722900	0.343016
TraesCS3D03G0953100	TraesCS4B03G0799600	0.341779
TraesCS3D03G0953100	TraesCS4B03G0975700	0.332026
TraesCS3D03G0953100	TraesCS4D03G0222900	0.324246
TraesCS3D03G0953100	TraesCS4D03G0434100	0.339131
TraesCS3D03G0953100	TraesCS4D03G0718000	0.339607
TraesCS3D03G0953100	TraesCS5A03G0009300	0.328261
TraesCS3D03G0953100	TraesCS5A03G1289300	0.331891
TraesCS3D03G0953100	TraesCS5B03G0371300	0.314287
TraesCS3D03G0953100	TraesCS5B03G0872400	0.328445
TraesCS3D03G0953100	TraesCS5B03G1136500	0.330787
TraesCS3D03G0953100	TraesCS5B03G1216200	0.343144
TraesCS3D03G0953100	TraesCS5D03G0011500	0.332162
TraesCS3D03G0953100	TraesCS5D03G0011700	0.342866
TraesCS3D03G0953100	TraesCS5D03G0460100	0.321947
TraesCS3D03G0953100	TraesCS5D03G0528000	0.319089
TraesCS3D03G0953100	TraesCS6B03G0366500	0.333044
TraesCS3D03G0953100	TraesCS6B03G0366600	0.325233
TraesCS3D03G0953100	TraesCS6D03G0690500	0.33816
TraesCS3D03G0953100	TraesCS7A03G0769100	0.325256
TraesCS3D03G0953100	TraesCS7B03G0222700	0.33815
TraesCS3D03G0953100	TraesCS7D03G0440800	0.316031
TraesCS3D03G0953100	TraesCS7D03G0548000	0.343429
TraesCS3D03G0953100	TraesCS7D03G1058600	0.335297
TraesCS3D03G0953100	TraesCS7D03G1073000	0.325836
TraesCS3D03G0953100	TraesCSU03G0103400	0.328575
TraesCS3D03G1045000	TraesCS3D03G1153700	0.308292
TraesCS3D03G1045000	TraesCS4A03G0085000	0.295576
TraesCS3D03G1045000	TraesCS4A03G0536600	0.305395
TraesCS3D03G1045000	TraesCS4A03G0683400	0.310173
TraesCS3D03G1045000	TraesCS4A03G1010300	0.31936
TraesCS3D03G1045000	TraesCS4B03G0722900	0.311144
TraesCS3D03G1045000	TraesCS4B03G0799600	0.302592
TraesCS3D03G1045000	TraesCS4B03G0975700	0.303989
TraesCS3D03G1045000	TraesCS4D03G0222900	0.319567
TraesCS3D03G1045000	TraesCS4D03G0434100	0.314819
TraesCS3D03G1045000	TraesCS4D03G0718000	0.32966
TraesCS3D03G1045000	TraesCS5A03G0009300	0.317015
TraesCS3D03G1045000	TraesCS5A03G1289300	0.304451
TraesCS3D03G1045000	TraesCS5B03G0371300	0.314031
TraesCS3D03G1045000	TraesCS5B03G0872400	0.302741
TraesCS3D03G1045000	TraesCS5B03G1136500	0.318926
TraesCS3D03G1045000	TraesCS5B03G1216200	0.299417
TraesCS3D03G1045000	TraesCS5D03G0011500	0.299364
TraesCS3D03G1045000	TraesCS5D03G0011700	0.309779
TraesCS3D03G1045000	TraesCS5D03G0460100	0.314261
TraesCS3D03G1045000	TraesCS5D03G0528000	0.328319
TraesCS3D03G1045000	TraesCS6B03G0366500	0.308322
TraesCS3D03G1045000	TraesCS6D03G0690500	0.305728
TraesCS3D03G1045000	TraesCS7A03G0769100	0.323005
TraesCS3D03G1045000	TraesCS7B03G0222700	0.301709
TraesCS3D03G1045000	TraesCS7D03G0440800	0.317292
TraesCS3D03G1045000	TraesCS7D03G0548000	0.294278
TraesCS3D03G1045000	TraesCS7D03G1058600	0.311839
TraesCS3D03G1045000	TraesCS7D03G1073000	0.296837
TraesCS3D03G1045000	TraesCSU03G0103400	0.30714
TraesCS3D03G1153700	TraesCS4A03G0085000	0.327706
TraesCS3D03G1153700	TraesCS4A03G0536600	0.327881
TraesCS3D03G1153700	TraesCS4A03G0683400	0.321698
TraesCS3D03G1153700	TraesCS4A03G1010300	0.325526
TraesCS3D03G1153700	TraesCS4B03G0722900	0.333618
TraesCS3D03G1153700	TraesCS4B03G0799600	0.316729
TraesCS3D03G1153700	TraesCS4B03G0975700	0.332245
TraesCS3D03G1153700	TraesCS4D03G0222900	0.328642
TraesCS3D03G1153700	TraesCS4D03G0434100	0.324436
TraesCS3D03G1153700	TraesCS4D03G0718000	0.33871
TraesCS3D03G1153700	TraesCS5A03G0009300	0.330651
TraesCS3D03G1153700	TraesCS5A03G1289300	0.333877
TraesCS3D03G1153700	TraesCS5B03G0371300	0.308534
TraesCS3D03G1153700	TraesCS5B03G0872400	0.327697
TraesCS3D03G1153700	TraesCS5B03G1136500	0.326648
TraesCS3D03G1153700	TraesCS5B03G1216200	0.328122
TraesCS3D03G1153700	TraesCS5D03G0011500	0.33174
TraesCS3D03G1153700	TraesCS5D03G0011700	0.338619
TraesCS3D03G1153700	TraesCS5D03G0460100	0.32951
TraesCS3D03G1153700	TraesCS5D03G0528000	0.325486
TraesCS3D03G1153700	TraesCS6B03G0366500	0.334923
TraesCS3D03G1153700	TraesCS6B03G0366600	0.309957
TraesCS3D03G1153700	TraesCS6D03G0690500	0.339367
TraesCS3D03G1153700	TraesCS7A03G0769100	0.331677
TraesCS3D03G1153700	TraesCS7B03G0222700	0.334209
TraesCS3D03G1153700	TraesCS7D03G0440800	0.316157
TraesCS3D03G1153700	TraesCS7D03G0548000	0.331424
TraesCS3D03G1153700	TraesCS7D03G1058600	0.335406
TraesCS3D03G1153700	TraesCS7D03G1073000	0.320129
TraesCS3D03G1153700	TraesCSU03G0103400	0.335284
TraesCS4A03G0085000	TraesCS4A03G0536600	0.320196
TraesCS4A03G0085000	TraesCS4A03G0683400	0.335771
TraesCS4A03G0085000	TraesCS4A03G1010300	0.329173
TraesCS4A03G0085000	TraesCS4B03G0722900	0.336012
TraesCS4A03G0085000	TraesCS4B03G0799600	0.3328
TraesCS4A03G0085000	TraesCS4B03G0975700	0.339359
TraesCS4A03G0085000	TraesCS4D03G0222900	0.318792
TraesCS4A03G0085000	TraesCS4D03G0434100	0.329986
TraesCS4A03G0085000	TraesCS4D03G0718000	0.327248
TraesCS4A03G0085000	TraesCS5A03G0009300	0.330988
TraesCS4A03G0085000	TraesCS5A03G1289300	0.335144
TraesCS4A03G0085000	TraesCS5B03G0371300	0.301533
TraesCS4A03G0085000	TraesCS5B03G0872400	0.338656
TraesCS4A03G0085000	TraesCS5B03G1136500	0.326891
TraesCS4A03G0085000	TraesCS5B03G1216200	0.336801
TraesCS4A03G0085000	TraesCS5D03G0011500	0.350372
TraesCS4A03G0085000	TraesCS5D03G0011700	0.334201
TraesCS4A03G0085000	TraesCS5D03G0460100	0.321445
TraesCS4A03G0085000	TraesCS5D03G0528000	0.303398
TraesCS4A03G0085000	TraesCS6B03G0366500	0.334668
TraesCS4A03G0085000	TraesCS6B03G0366600	0.340363
TraesCS4A03G0085000	TraesCS6D03G0690500	0.344505
TraesCS4A03G0085000	TraesCS7A03G0769100	0.315583
TraesCS4A03G0085000	TraesCS7B03G0222700	0.338769
TraesCS4A03G0085000	TraesCS7D03G0440800	0.306313
TraesCS4A03G0085000	TraesCS7D03G0548000	0.335807
TraesCS4A03G0085000	TraesCS7D03G1058600	0.340762
TraesCS4A03G0085000	TraesCS7D03G1073000	0.334005
TraesCS4A03G0085000	TraesCSU03G0103400	0.334974
TraesCS4A03G0536600	TraesCS4A03G0683400	0.316255
TraesCS4A03G0536600	TraesCS4A03G1010300	0.333994
TraesCS4A03G0536600	TraesCS4B03G0722900	0.338147
TraesCS4A03G0536600	TraesCS4B03G0799600	0.331777
TraesCS4A03G0536600	TraesCS4B03G0975700	0.319936
TraesCS4A03G0536600	TraesCS4D03G0222900	0.33139
TraesCS4A03G0536600	TraesCS4D03G0434100	0.34128
TraesCS4A03G0536600	TraesCS4D03G0718000	0.346822
TraesCS4A03G0536600	TraesCS5A03G0009300	0.323777
TraesCS4A03G0536600	TraesCS5A03G1289300	0.324946
TraesCS4A03G0536600	TraesCS5B03G0371300	0.305053
TraesCS4A03G0536600	TraesCS5B03G0872400	0.308773
TraesCS4A03G0536600	TraesCS5B03G1136500	0.330773
TraesCS4A03G0536600	TraesCS5B03G1216200	0.328456
TraesCS4A03G0536600	TraesCS5D03G0011500	0.319415
TraesCS4A03G0536600	TraesCS5D03G0011700	0.334625
TraesCS4A03G0536600	TraesCS5D03G0460100	0.322156
TraesCS4A03G0536600	TraesCS5D03G0528000	0.33399
TraesCS4A03G0536600	TraesCS6B03G0366500	0.326277
TraesCS4A03G0536600	TraesCS6B03G0366600	0.29536
TraesCS4A03G0536600	TraesCS6D03G0690500	0.324622
TraesCS4A03G0536600	TraesCS7A03G0769100	0.332237
TraesCS4A03G0536600	TraesCS7B03G0222700	0.325066
TraesCS4A03G0536600	TraesCS7D03G0440800	0.317544
TraesCS4A03G0536600	TraesCS7D03G0548000	0.319649
TraesCS4A03G0536600	TraesCS7D03G1058600	0.33017
TraesCS4A03G0536600	TraesCS7D03G1073000	0.312683
TraesCS4A03G0536600	TraesCSU03G0103400	0.314249
TraesCS4A03G0683400	TraesCS4A03G1010300	0.338491
TraesCS4A03G0683400	TraesCS4B03G0722900	0.336478
TraesCS4A03G0683400	TraesCS4B03G0799600	0.329615
TraesCS4A03G0683400	TraesCS4B03G0975700	0.321545
TraesCS4A03G0683400	TraesCS4D03G0222900	0.316249
TraesCS4A03G0683400	TraesCS4D03G0434100	0.333281
TraesCS4A03G0683400	TraesCS4D03G0718000	0.331435
TraesCS4A03G0683400	TraesCS5A03G0009300	0.318364
TraesCS4A03G0683400	TraesCS5A03G1289300	0.320016
TraesCS4A03G0683400	TraesCS5B03G0371300	0.319524
TraesCS4A03G0683400	TraesCS5B03G0872400	0.316075
TraesCS4A03G0683400	TraesCS5B03G1136500	0.322232
TraesCS4A03G0683400	TraesCS5B03G1216200	0.333685
TraesCS4A03G0683400	TraesCS5D03G0011500	0.324577
TraesCS4A03G0683400	TraesCS5D03G0011700	0.335316
TraesCS4A03G0683400	TraesCS5D03G0460100	0.312956
TraesCS4A03G0683400	TraesCS5D03G0528000	0.315757
TraesCS4A03G0683400	TraesCS6B03G0366500	0.318041
TraesCS4A03G0683400	TraesCS6B03G0366600	0.315634
TraesCS4A03G0683400	TraesCS6D03G0690500	0.328616
TraesCS4A03G0683400	TraesCS7A03G0769100	0.321887
TraesCS4A03G0683400	TraesCS7B03G0222700	0.329874
TraesCS4A03G0683400	TraesCS7D03G0440800	0.313559
TraesCS4A03G0683400	TraesCS7D03G0548000	0.332709
TraesCS4A03G0683400	TraesCS7D03G1058600	0.328469
TraesCS4A03G0683400	TraesCS7D03G1073000	0.316268
TraesCS4A03G0683400	TraesCSU03G0103400	0.316136
TraesCS4A03G1010300	TraesCS4B03G0722900	0.338487
TraesCS4A03G1010300	TraesCS4B03G0799600	0.331437
TraesCS4A03G1010300	TraesCS4B03G0975700	0.331614
TraesCS4A03G1010300	TraesCS4D03G0222900	0.330061
TraesCS4A03G1010300	TraesCS4D03G0434100	0.334027
TraesCS4A03G1010300	TraesCS4D03G0718000	0.324842
TraesCS4A03G1010300	TraesCS5A03G0009300	0.335136
TraesCS4A03G1010300	TraesCS5A03G1289300	0.329852
TraesCS4A03G1010300	TraesCS5B03G0371300	0.315727
TraesCS4A03G1010300	TraesCS5B03G0872400	0.335056
TraesCS4A03G1010300	TraesCS5B03G1136500	0.335239
TraesCS4A03G1010300	TraesCS5B03G1216200	0.336539
TraesCS4A03G1010300	TraesCS5D03G0011500	0.337634
TraesCS4A03G1010300	TraesCS5D03G0011700	0.334166
TraesCS4A03G1010300	TraesCS5D03G0460100	0.328724
TraesCS4A03G1010300	TraesCS5D03G0528000	0.316765
TraesCS4A03G1010300	TraesCS6B03G0366500	0.33273
TraesCS4A03G1010300	TraesCS6B03G0366600	0.336885
TraesCS4A03G1010300	TraesCS6D03G0690500	0.340992
TraesCS4A03G1010300	TraesCS7A03G0769100	0.315815
TraesCS4A03G1010300	TraesCS7B03G0222700	0.330719
TraesCS4A03G1010300	TraesCS7D03G0440800	0.312788
TraesCS4A03G1010300	TraesCS7D03G0548000	0.331953
TraesCS4A03G1010300	TraesCS7D03G1058600	0.338622
TraesCS4A03G1010300	TraesCS7D03G1073000	0.340401
TraesCS4A03G1010300	TraesCSU03G0103400	0.334129
TraesCS4B03G0722900	TraesCS4B03G0799600	0.339026
TraesCS4B03G0722900	TraesCS4B03G0975700	0.337263
TraesCS4B03G0722900	TraesCS4D03G0222900	0.331846
TraesCS4B03G0722900	TraesCS4D03G0434100	0.340134
TraesCS4B03G0722900	TraesCS4D03G0718000	0.346752
TraesCS4B03G0722900	TraesCS5A03G0009300	0.336541
TraesCS4B03G0722900	TraesCS5A03G1289300	0.337327
TraesCS4B03G0722900	TraesCS5B03G0371300	0.320074
TraesCS4B03G0722900	TraesCS5B03G0872400	0.336379
TraesCS4B03G0722900	TraesCS5B03G1136500	0.335168
TraesCS4B03G0722900	TraesCS5B03G1216200	0.335429
TraesCS4B03G0722900	TraesCS5D03G0011500	0.344736
TraesCS4B03G0722900	TraesCS5D03G0011700	0.337122
TraesCS4B03G0722900	TraesCS5D03G0460100	0.330712
TraesCS4B03G0722900	TraesCS5D03G0528000	0.328183
TraesCS4B03G0722900	TraesCS6B03G0366500	0.339427
TraesCS4B03G0722900	TraesCS6B03G0366600	0.333301
TraesCS4B03G0722900	TraesCS6D03G0690500	0.342961
TraesCS4B03G0722900	TraesCS7A03G0769100	0.332171
TraesCS4B03G0722900	TraesCS7B03G0222700	0.333454
TraesCS4B03G0722900	TraesCS7D03G0440800	0.32227
TraesCS4B03G0722900	TraesCS7D03G0548000	0.333638
TraesCS4B03G0722900	TraesCS7D03G1058600	0.343751
TraesCS4B03G0722900	TraesCS7D03G1073000	0.343362
TraesCS4B03G0722900	TraesCSU03G0103400	0.33889
TraesCS4B03G0799600	TraesCS4B03G0975700	0.327514
TraesCS4B03G0799600	TraesCS4D03G0222900	0.320085
TraesCS4B03G0799600	TraesCS4D03G0434100	0.331763
TraesCS4B03G0799600	TraesCS4D03G0718000	0.331277
TraesCS4B03G0799600	TraesCS5A03G0009300	0.32604
TraesCS4B03G0799600	TraesCS5A03G1289300	0.325013
TraesCS4B03G0799600	TraesCS5B03G0371300	0.30976
TraesCS4B03G0799600	TraesCS5B03G0872400	0.327766
TraesCS4B03G0799600	TraesCS5B03G1136500	0.326846
TraesCS4B03G0799600	TraesCS5B03G1216200	0.340324
TraesCS4B03G0799600	TraesCS5D03G0011500	0.34066
TraesCS4B03G0799600	TraesCS5D03G0011700	0.333579
TraesCS4B03G0799600	TraesCS5D03G0460100	0.317165
TraesCS4B03G0799600	TraesCS5D03G0528000	0.310093
TraesCS4B03G0799600	TraesCS6B03G0366500	0.327432
TraesCS4B03G0799600	TraesCS6B03G0366600	0.329666
TraesCS4B03G0799600	TraesCS6D03G0690500	0.344671
TraesCS4B03G0799600	TraesCS7A03G0769100	0.312438
TraesCS4B03G0799600	TraesCS7B03G0222700	0.331962
TraesCS4B03G0799600	TraesCS7D03G0440800	0.302448
TraesCS4B03G0799600	TraesCS7D03G0548000	0.330971
TraesCS4B03G0799600	TraesCS7D03G1058600	0.342747
TraesCS4B03G0799600	TraesCS7D03G1073000	0.338819
TraesCS4B03G0799600	TraesCSU03G0103400	0.327697
TraesCS4B03G0975700	TraesCS4D03G0222900	0.322533
TraesCS4B03G0975700	TraesCS4D03G0434100	0.330241
TraesCS4B03G0975700	TraesCS4D03G0718000	0.33872
TraesCS4B03G0975700	TraesCS5A03G0009300	0.324512
TraesCS4B03G0975700	TraesCS5A03G1289300	0.330076
TraesCS4B03G0975700	TraesCS5B03G0371300	0.308276
TraesCS4B03G0975700	TraesCS5B03G0872400	0.326776
TraesCS4B03G0975700	TraesCS5B03G1136500	0.323984
TraesCS4B03G0975700	TraesCS5B03G1216200	0.33313
TraesCS4B03G0975700	TraesCS5D03G0011500	0.333249
TraesCS4B03G0975700	TraesCS5D03G0011700	0.343284
TraesCS4B03G0975700	TraesCS5D03G0460100	0.321647
TraesCS4B03G0975700	TraesCS5D03G0528000	0.321859
TraesCS4B03G0975700	TraesCS6B03G0366500	0.330754
TraesCS4B03G0975700	TraesCS6B03G0366600	0.316304
TraesCS4B03G0975700	TraesCS6D03G0690500	0.338409
TraesCS4B03G0975700	TraesCS7A03G0769100	0.32986
TraesCS4B03G0975700	TraesCS7B03G0222700	0.336802
TraesCS4B03G0975700	TraesCS7D03G0440800	0.315773
TraesCS4B03G0975700	TraesCS7D03G0548000	0.340665
TraesCS4B03G0975700	TraesCS7D03G1058600	0.331963
TraesCS4B03G0975700	TraesCS7D03G1073000	0.319759
TraesCS4B03G0975700	TraesCSU03G0103400	0.329416
TraesCS4D03G0222900	TraesCS4D03G0434100	0.331464
TraesCS4D03G0222900	TraesCS4D03G0718000	0.343722
TraesCS4D03G0222900	TraesCS5A03G0009300	0.324458
TraesCS4D03G0222900	TraesCS5A03G1289300	0.325279
TraesCS4D03G0222900	TraesCS5B03G0371300	0.320888
TraesCS4D03G0222900	TraesCS5B03G0872400	0.315802
TraesCS4D03G0222900	TraesCS5B03G1136500	0.323104
TraesCS4D03G0222900	TraesCS5B03G1216200	0.320531
TraesCS4D03G0222900	TraesCS5D03G0011500	0.320771
TraesCS4D03G0222900	TraesCS5D03G0011700	0.334369
TraesCS4D03G0222900	TraesCS5D03G0460100	0.323727
TraesCS4D03G0222900	TraesCS5D03G0528000	0.333009
TraesCS4D03G0222900	TraesCS6B03G0366500	0.324542
TraesCS4D03G0222900	TraesCS6B03G0366600	0.29997
TraesCS4D03G0222900	TraesCS6D03G0690500	0.328874
TraesCS4D03G0222900	TraesCS7A03G0769100	0.336236
TraesCS4D03G0222900	TraesCS7B03G0222700	0.323405
TraesCS4D03G0222900	TraesCS7D03G0440800	0.321655
TraesCS4D03G0222900	TraesCS7D03G0548000	0.320938
TraesCS4D03G0222900	TraesCS7D03G1058600	0.330947
TraesCS4D03G0222900	TraesCS7D03G1073000	0.318241
TraesCS4D03G0222900	TraesCSU03G0103400	0.324605
TraesCS4D03G0434100	TraesCS4D03G0718000	0.342051
TraesCS4D03G0434100	TraesCS5A03G0009300	0.333621
TraesCS4D03G0434100	TraesCS5A03G1289300	0.331064
TraesCS4D03G0434100	TraesCS5B03G0371300	0.320378
TraesCS4D03G0434100	TraesCS5B03G0872400	0.331111
TraesCS4D03G0434100	TraesCS5B03G1136500	0.334439
TraesCS4D03G0434100	TraesCS5B03G1216200	0.337329
TraesCS4D03G0434100	TraesCS5D03G0011500	0.337052
TraesCS4D03G0434100	TraesCS5D03G0011700	0.33507
TraesCS4D03G0434100	TraesCS5D03G0460100	0.328056
TraesCS4D03G0434100	TraesCS5D03G0528000	0.325183
TraesCS4D03G0434100	TraesCS6B03G0366500	0.334802
TraesCS4D03G0434100	TraesCS6B03G0366600	0.328256
TraesCS4D03G0434100	TraesCS6D03G0690500	0.343035
TraesCS4D03G0434100	TraesCS7A03G0769100	0.324532
TraesCS4D03G0434100	TraesCS7B03G0222700	0.33116
TraesCS4D03G0434100	TraesCS7D03G0440800	0.315858
TraesCS4D03G0434100	TraesCS7D03G0548000	0.328451
TraesCS4D03G0434100	TraesCS7D03G1058600	0.343209
TraesCS4D03G0434100	TraesCS7D03G1073000	0.34322
TraesCS4D03G0434100	TraesCSU03G0103400	0.334586
TraesCS4D03G0718000	TraesCS5A03G0009300	0.340373
TraesCS4D03G0718000	TraesCS5A03G1289300	0.34246
TraesCS4D03G0718000	TraesCS5B03G0371300	0.309693
TraesCS4D03G0718000	TraesCS5B03G0872400	0.332547
TraesCS4D03G0718000	TraesCS5B03G1136500	0.341121
TraesCS4D03G0718000	TraesCS5B03G1216200	0.340223
TraesCS4D03G0718000	TraesCS5D03G0011500	0.336496
TraesCS4D03G0718000	TraesCS5D03G0011700	0.346995
TraesCS4D03G0718000	TraesCS5D03G0460100	0.339958
TraesCS4D03G0718000	TraesCS5D03G0528000	0.333929
TraesCS4D03G0718000	TraesCS6B03G0366500	0.342982
TraesCS4D03G0718000	TraesCS6B03G0366600	0.316859
TraesCS4D03G0718000	TraesCS6D03G0690500	0.345751
TraesCS4D03G0718000	TraesCS7A03G0769100	0.332516
TraesCS4D03G0718000	TraesCS7B03G0222700	0.340405
TraesCS4D03G0718000	TraesCS7D03G0440800	0.31585
TraesCS4D03G0718000	TraesCS7D03G0548000	0.334874
TraesCS4D03G0718000	TraesCS7D03G1058600	0.347501
TraesCS4D03G0718000	TraesCS7D03G1073000	0.335549
TraesCS4D03G0718000	TraesCSU03G0103400	0.341799
TraesCS5A03G0009300	TraesCS5A03G1289300	0.326929
TraesCS5A03G0009300	TraesCS5B03G0371300	0.320774
TraesCS5A03G0009300	TraesCS5B03G0872400	0.320143
TraesCS5A03G0009300	TraesCS5B03G1136500	0.324997
TraesCS5A03G0009300	TraesCS5B03G1216200	0.328544
TraesCS5A03G0009300	TraesCS5D03G0011500	0.326405
TraesCS5A03G0009300	TraesCS5D03G0011700	0.339499
TraesCS5A03G0009300	TraesCS5D03G0460100	0.320984
TraesCS5A03G0009300	TraesCS5D03G0528000	0.327924
TraesCS5A03G0009300	TraesCS6B03G0366500	0.325119
TraesCS5A03G0009300	TraesCS6B03G0366600	0.308988
TraesCS5A03G0009300	TraesCS6D03G0690500	0.331706
TraesCS5A03G0009300	TraesCS7A03G0769100	0.334277
TraesCS5A03G0009300	TraesCS7B03G0222700	0.331612
TraesCS5A03G0009300	TraesCS7D03G0440800	0.320047
TraesCS5A03G0009300	TraesCS7D03G0548000	0.331557
TraesCS5A03G0009300	TraesCS7D03G1058600	0.329972
TraesCS5A03G0009300	TraesCS7D03G1073000	0.317167
TraesCS5A03G0009300	TraesCSU03G0103400	0.323814
TraesCS5A03G1289300	TraesCS5B03G0371300	0.306516
TraesCS5A03G1289300	TraesCS5B03G0872400	0.325476
TraesCS5A03G1289300	TraesCS5B03G1136500	0.323115
TraesCS5A03G1289300	TraesCS5B03G1216200	0.330854
TraesCS5A03G1289300	TraesCS5D03G0011500	0.332827
TraesCS5A03G1289300	TraesCS5D03G0011700	0.344075
TraesCS5A03G1289300	TraesCS5D03G0460100	0.32493
TraesCS5A03G1289300	TraesCS5D03G0528000	0.326214
[truncated: 17,570 more rows]
