# Supplementary material for: Computational genomics insights into cold acclimation in wheat
Source: Front Genet. 2022 Oct 20;13:1015673. doi: 10.3389/fgene.2022.1015673 (PMC9632429; doi:10.3389/fgene.2022.1015673)
Supplement: Supplementary file 6 [file Table4.XLSX]

## Sheet: Lists
Supplementary File S4 | Details of cold hardy genes and anti-hardy genes presented in Figure 4.
Gene_ID
	Gene name	Description
TraesCS1A03G0304900		Conserved hypothetical protein
TraesCS1B03G0360800		RING finger and transmembrane domain-containing protein 2-like
TraesCS1B03G0654800	SGPP	haloacid dehalogenase-like hydrolase domain-containing protein Sgpp
TraesCS1B03G0874000		transcription factor GAMYB-like isoform X1
TraesCS1B03G0882400	Oc2*	cysteine proteinase inhibitor-like
TraesCS1D03G0221500		glutathione S-transferase 4-like
TraesCS1D03G0686300		probable membrane-associated kinase regulator 4
TraesCS1D03G0737600	Oc2*	cysteine proteinase inhibitor
TraesCS1D03G0944000	OsRab11C3	ras-related protein RABA1f-like
TraesCS2A03G0054400		HR-like lesion-inducer family protein
TraesCS2A03G0325900		uncharacterized protein LOC123187869
TraesCS2A03G1236100		pectinesterase inhibitor 8-like
TraesCS2B03G0082600		HR-like lesion-inducer family protein
TraesCS2B03G0514500		interferon-related developmental regulator 2-like
TraesCS2B03G0690600	OsRLCK223	probable receptor-like protein kinase At1g49730 isoform X1
TraesCS2B03G1308500	SAPK1	Serine/threonine protein kinase, Hyperosmotic stress respons
TraesCS2D03G0055600		HR-like lesion-inducer family protein
TraesCS2D03G0234900		UDP-glucuronic acid decarboxylase 4-like
TraesCS2D03G0404700		interferon-related developmental regulator 2-like
TraesCS2D03G0812700	OsHCT1	hydroxycinnamoyltransferase 1-like
TraesCS2D03G0911500		protein RKD5-like
TraesCS3B03G0014400
TraesCS3B03G0141200		non-specific lipid-transfer protein 4.1-like
TraesCS3B03G0987700	P5CS2	delta-1-pyrroline-5-carboxylate synthase 2-like
TraesCS3D03G0047400
TraesCS3D03G0413100		cysteine proteinase inhibitor 12-like
TraesCS3D03G0949700	ONAC041	NAC domain-containing protein 83-like
TraesCS4A03G0180900		Harpin-induced 1 domain containing protein
TraesCS4A03G0266600	CK1	CBL-interacting protein kinase 31-like isoform X2
TraesCS4A03G0679200		glucan endo-1,3-beta-glucosidase 7-like
TraesCS4A03G1138500		probable glutathione S-transferase GSTU6
TraesCS4B03G0915000	OsSub25	subtilisin-like protease 4
TraesCS4B03G1005300		DIBOA-glucoside dioxygenase BX6-like
TraesCS4D03G0736900		probable serine/threonine-protein kinase At1g01540
TraesCS5A03G0248600		auxin-binding protein 4
TraesCS5A03G0434000
TraesCS5A03G0564300		low molecular mass early light-inducible protein HV90, chloroplastic-like
TraesCS5A03G0864400	OsRCI2-11	low temperature-induced protein lt101.2-like
TraesCS5A03G0968800		protein AE7-like 1
TraesCS5A03G1126300		actin-depolymerizing factor 3
TraesCS5B03G0149900		tuliposide A-converting enzyme 2, chloroplastic-like
TraesCS5B03G1309300		Nucleotide-diphospho-sugar transferase domain containing protein
TraesCS5B03G1309400		Nucleotide-diphospho-sugar transferase domain containing protein
TraesCS5B03G1367500		serine/threonine-protein phosphatase PP1-like
TraesCS5D03G0169500	OsIAA3	auxin-responsive protein IAA31-like
TraesCS5D03G0230900		uncharacterized protein LOC123119728
TraesCS5D03G0561000		putative ripening-related protein 2
TraesCS5D03G1068400		multiple inositol polyphosphate phosphatase 1
TraesCS6B03G0877600		galactan beta-1,4-galactosyltransferase GALS1-like
TraesCS6D03G0772500	DHN3	Salt-induced YSK2 dehydrin 3
TraesCS7A03G0398900	LYP6	lysM domain-containing GPI-anchored protein LYP6-like
TraesCS7A03G0474100
TraesCS7A03G0546400		alpha-1,3-arabinosyltransferase XAT3-like
TraesCS7A03G0941200		uncharacterized membrane protein At1g16860-like
TraesCS7A03G1041100	NRT2.4	High-affinity nitrate transporter, Nitrate transport, Auxin signalin
TraesCS7B03G0073300	OSENOD93B	early nodulin-93-like
TraesCS7B03G0271100		pyruvate dehydrogenase E1 component subunit alpha-2, mitochondrial-like
TraesCS7B03G0786000		uncharacterized membrane protein At1g16860-like
TraesCS7B03G1059600		Conserved hypothetical protein
TraesCS7D03G0069600		Glutathione transferase
TraesCS7D03G0286800	OsERF#007	ethylene-responsive transcription factor RAP2-9-like
TraesCS7D03G0383800	LYP6	lysM domain-containing GPI-anchored protein LYP6-like
TraesCS7D03G0446000		pyruvate dehydrogenase E1 component subunit alpha-2, mitochondrial-like
TraesCS7D03G0906100		uncharacterized membrane protein At1g16860-like
TraesCS1A03G0891800	OsSNDP6	phosphatidylinositol/phosphatidylcholine transfer protein SFH8-like isoform X1
TraesCS1B03G0956400		acetylserotonin O-methyltransferase 1-like
TraesCS1D03G0390800		serine/threonine-protein kinase tricornered-like
TraesCS2A03G0080500		disease resistance protein Pik-2-like
TraesCS2A03G0408900		uncharacterized protein LOC123188180
TraesCS2A03G0608600		Outer arm dynein light chain 1 protein
TraesCS2A03G0735800	OsalphaCA2	alpha carbonic anhydrase 1, chloroplastic-like isoform X1
TraesCS2A03G0767000		uncharacterized protein LOC123189276
TraesCS2A03G0873900		calcium uptake protein, mitochondrial-like
TraesCS2D03G0196100	ZRP4	Similar to O-methyltransferase ZRP4 (EC 2.1.1.-
TraesCS2D03G0868600
TraesCS2D03G1118600	OsFPPS3	farnesyl pyrophosphate synthase-like isoform X2
TraesCS2D03G1134400	SULTR3	probable sulfate transporter 3.3
TraesCS2D03G1170700	IIP5	Similar to ORW1943Ba0077G13.1 protein
TraesCS3B03G0008000		subtilisin-like protease SBT3.5
TraesCS3B03G0465000		carboxylesterase SOBER1-like isoform X2
TraesCS3D03G0189000		leucine-rich repeat receptor protein kinase HPCA1-like
TraesCS3D03G0584900		putative Peroxidase 48 isoform X1
TraesCS3D03G0597600	OsFPPS1	Farnesyl pyrophosphate synthase 2
TraesCS4A03G0112900		ninja-family protein MODD-like
TraesCS4A03G0337400		receptor protein kinase TMK1-like
TraesCS4B03G0621700	OsACBP5	acyl-CoA-binding domain-containing protein 5-like
TraesCS4B03G0840600		trans-cinnamate:CoA ligase, peroxisomal-like
TraesCS5B03G0347000		uncharacterized protein LOC123111145
TraesCS5B03G0976500	OsMyoXIE	myosin-12-like isoform X1
TraesCS5D03G0344400	OsENA1	Major facilitator superfamily protein
TraesCS5D03G0399000		Alpha/beta hydrolase family protein
TraesCS5D03G0785000	SAUR39	auxin-responsive protein SAUR36-like
TraesCS5D03G0914000	COR413-PM1	cold-regulated 413 plasma membrane protein 1
TraesCS5D03G1198800		putative disease resistance protein RGA3
TraesCS5D03G1228200		ubiquitin-conjugating enzyme E2-23 kDa-like isoform X2
TraesCS6B03G0469400
TraesCS6B03G1137500	BBD2	bifunctional nuclease-like
TraesCS7A03G0007400		signal peptide peptidase-like 2 isoform X1
TraesCS7A03G0292200
TraesCS7A03G1132800		uncharacterized protein LOC123149115
TraesCS7B03G1255800		Serine/threonine-protein kinase
TraesCS7D03G0002800		LRR receptor-like serine/threonine-protein kinase RGI5
TraesCS7D03G1225400		protein NRT1/ PTR FAMILY 8.3 isoform X2

## Sheet: geneTraitCor_R
	Cold	Cold_winter_habit	DGDG(34:6)	DGDG(34:5)	DGDG(34:4)	DGDG(34:3)	DGDG(34:2)	DGDG(34:1)	DGDG(36:6)	DGDG(36:5)	DGDG(36:4)	DGDG(36:3)	DGDG(36:2)	DGDG(36:1)	DGDG(38:6)	DGDG(38:5)	Total_DGDG	MGDG(34:6)	MGDG(34:5)	MGDG(34:4)	MGDG(34:3)	MGDG(34:2)	MGDG(36:6)	MGDG(36:5)	MGDG(36:4)	MGDG(36:3)	MGDG(36:2)	MGDG(38:6)	MGDG(38:5)	MGDG(38:4)	Total_MGDG	PG(16:1)	PG(32:1)	PG(32:0)	PG(34:4)	PG(34:3)	PG(34:2)	PG(34:1)	PG(34:0)	PG(36:6)	PG(36:5)	PG(36:4)	PG(36:3)	Total_PG_Ealier	Total_PG_All	LPG(16:1)	LPG(18:3)	LPC(16:0)	LPC(18:3)
TraesCS1A03G0304900	0.644712	0.728721	-0.575933	-0.712729	-0.665431	-0.717479	-0.811627	-0.672331	-0.479628	-0.684603	-0.655278	-0.735695	-0.796307	-0.641976	-0.712564	-0.739277	-0.660677	-0.608665	-0.694075	-0.674836	-0.710106	-0.733352	-0.768366	-0.651418	-0.666984	-0.690963	-0.640779	-0.774737	-0.720623	-0.798902	-0.757032	-0.885587	-0.677044	0.194103	-0.744049	0.892791	0.687044	-0.751625	-0.44319	0.879692	0.623331	0.447924	0.61716	-0.653175	-0.861973	-0.321963	0.493149	0.325151	0.292774
TraesCS1B03G0360800	0.968069	0.709118	-0.463026	-0.841638	-0.854712	-0.933757	-0.955099	-0.927152	-0.255039	-0.945294	-0.905421	-0.924273	-0.969465	-0.660585	-0.586643	-0.917349	-0.596897	-0.702505	-0.930144	-0.949456	-0.971946	-0.947426	-0.921509	-0.9585	-0.962662	-0.94904	-0.920198	-0.954848	-0.889827	-0.606966	-0.93659	-0.969022	-0.965094	-0.354004	-0.961618	0.900125	0.789801	-0.98703	-0.781633	0.922237	0.939518	0.650565	0.87851	-0.927121	-0.981227	-0.256074	0.897879	0.78337	0.784941
TraesCS1B03G0654800	0.801807	0.833445	-0.586158	-0.783385	-0.747329	-0.804221	-0.878342	-0.774475	-0.352624	-0.810801	-0.743802	-0.814192	-0.859147	-0.691058	-0.608088	-0.850944	-0.609974	-0.666063	-0.808139	-0.800257	-0.825175	-0.800803	-0.828218	-0.790012	-0.788622	-0.793205	-0.759299	-0.835222	-0.824866	-0.664954	-0.829984	-0.980614	-0.821754	0.00539177	-0.852101	0.983968	0.873715	-0.866771	-0.570991	0.977904	0.823544	0.701154	0.773718	-0.755445	-0.96023	-0.36956	0.710777	0.50848	0.489838
TraesCS1B03G0874000	0.638978	0.807	-0.365653	-0.584555	-0.537369	-0.631118	-0.764398	-0.686336	-0.188392	-0.613814	-0.551042	-0.641228	-0.748042	-0.506579	-0.436282	-0.64346	-0.413666	-0.435751	-0.61433	-0.625089	-0.685417	-0.722379	-0.6475	-0.619969	-0.647846	-0.681891	-0.608194	-0.692695	-0.605677	-0.62692	-0.650836	-0.880499	-0.657489	0.200028	-0.692824	0.912048	0.805035	-0.764253	-0.451604	0.916009	0.689086	0.552394	0.706809	-0.575291	-0.843743	-0.177075	0.591959	0.354371	0.368923
TraesCS1B03G0882400	0.807115	0.739735	-0.553386	-0.794543	-0.768857	-0.827832	-0.877636	-0.770163	-0.383381	-0.822271	-0.768244	-0.834319	-0.876574	-0.669342	-0.638771	-0.864411	-0.641157	-0.685126	-0.812423	-0.814119	-0.841651	-0.831517	-0.849291	-0.801265	-0.805864	-0.808411	-0.764308	-0.862685	-0.828261	-0.686563	-0.849803	-0.977087	-0.8288	0.0387498	-0.867125	0.978251	0.832966	-0.866304	-0.559632	0.978393	0.816378	0.631899	0.756354	-0.77765	-0.96124	-0.342984	0.686563	0.538947	0.49264
TraesCS1D03G0221500	0.502502	0.740454	-0.417014	-0.505214	-0.440729	-0.504382	-0.604278	-0.494308	-0.201268	-0.504401	-0.411763	-0.517741	-0.586827	-0.502954	-0.358603	-0.594892	-0.367425	-0.426864	-0.497211	-0.498453	-0.542822	-0.546523	-0.528728	-0.484945	-0.491275	-0.518829	-0.465466	-0.551858	-0.557447	-0.500877	-0.527599	-0.812294	-0.540787	0.389386	-0.578788	0.900259	0.835417	-0.602816	-0.267571	0.884068	0.609732	0.619318	0.553339	-0.429172	-0.760196	-0.28034	0.451941	0.21432	0.17774
TraesCS1D03G0686300	0.798621	0.794089	-0.631973	-0.815939	-0.785199	-0.830011	-0.902447	-0.782486	-0.453244	-0.824362	-0.77852	-0.843507	-0.889311	-0.703483	-0.71209	-0.859894	-0.693307	-0.691138	-0.825536	-0.809499	-0.832291	-0.820362	-0.868811	-0.7945	-0.797562	-0.800687	-0.772458	-0.868508	-0.840461	-0.764461	-0.864892	-0.969501	-0.816099	-0.0129903	-0.861015	0.951777	0.787192	-0.870407	-0.587924	0.946787	0.775568	0.604148	0.756605	-0.7813	-0.955512	-0.368251	0.663211	0.492609	0.469402
TraesCS1D03G0737600	0.829343	0.760324	-0.547431	-0.803095	-0.779522	-0.835057	-0.886903	-0.7819	-0.359868	-0.836328	-0.776368	-0.842081	-0.878671	-0.656256	-0.610358	-0.871219	-0.627909	-0.68082	-0.825398	-0.828542	-0.853148	-0.834645	-0.852422	-0.816288	-0.818923	-0.816571	-0.771344	-0.860986	-0.82893	-0.653089	-0.854838	-0.984935	-0.843891	0.00469063	-0.878124	0.985571	0.864344	-0.881351	-0.573185	0.989031	0.845535	0.678724	0.795144	-0.787663	-0.969635	-0.349735	0.720029	0.5672	0.52541
TraesCS1D03G0944000	0.53291	0.790693	-0.480078	-0.5611	-0.493527	-0.540865	-0.653457	-0.520518	-0.268714	-0.541101	-0.452698	-0.561417	-0.614193	-0.523882	-0.417878	-0.624122	-0.432525	-0.461782	-0.541008	-0.531158	-0.566678	-0.56054	-0.57465	-0.510423	-0.514078	-0.536314	-0.480441	-0.576074	-0.582445	-0.535844	-0.57026	-0.835942	-0.562807	0.356198	-0.610739	0.915861	0.852255	-0.631448	-0.282974	0.898757	0.624736	0.652349	0.601041	-0.464288	-0.786379	-0.333871	0.467235	0.224063	0.191167
TraesCS2A03G0054400	0.75302	0.822718	-0.50245	-0.693527	-0.658026	-0.743656	-0.831901	-0.763567	-0.254064	-0.746348	-0.674833	-0.746652	-0.843472	-0.657021	-0.538126	-0.788729	-0.512019	-0.577465	-0.738563	-0.742797	-0.790227	-0.796367	-0.762475	-0.74574	-0.756122	-0.775572	-0.747954	-0.807703	-0.776647	-0.684481	-0.767922	-0.960174	-0.780479	0.051724	-0.799478	0.966496	0.837935	-0.848078	-0.579666	0.963906	0.782782	0.624961	0.732542	-0.696373	-0.932455	-0.253739	0.684501	0.457806	0.460736
TraesCS2A03G0325900	0.578922	0.762634	-0.483691	-0.599053	-0.542518	-0.585162	-0.683121	-0.548779	-0.288343	-0.58602	-0.499561	-0.604161	-0.655514	-0.51939	-0.440369	-0.66445	-0.46606	-0.487445	-0.578826	-0.574719	-0.609443	-0.604848	-0.617664	-0.554123	-0.559457	-0.573601	-0.51896	-0.619284	-0.614939	-0.556083	-0.613759	-0.863189	-0.602251	0.325885	-0.651734	0.934478	0.857951	-0.668938	-0.318771	0.925239	0.659363	0.653818	0.643909	-0.510597	-0.817594	-0.326417	0.493941	0.280578	0.234992
TraesCS2A03G1236100	0.645904	0.683124	-0.432367	-0.658667	-0.620871	-0.658171	-0.736559	-0.592586	-0.322033	-0.646941	-0.578536	-0.676455	-0.709583	-0.461082	-0.470359	-0.702692	-0.521193	-0.516822	-0.632959	-0.642265	-0.674416	-0.679457	-0.682538	-0.61494	-0.629157	-0.631926	-0.549533	-0.677336	-0.622346	-0.556952	-0.678678	-0.881394	-0.652818	0.291831	-0.71396	0.939517	0.847778	-0.719128	-0.340749	0.947732	0.705979	0.625816	0.720717	-0.58742	-0.846668	-0.305277	0.530639	0.38988	0.318668
TraesCS2B03G0082600	0.736198	0.762177	-0.498673	-0.718338	-0.681594	-0.73931	-0.810093	-0.697087	-0.310713	-0.738493	-0.6664	-0.749599	-0.796052	-0.594657	-0.52716	-0.790657	-0.549934	-0.599395	-0.727331	-0.732547	-0.764974	-0.756252	-0.758387	-0.717736	-0.723899	-0.730307	-0.674058	-0.770069	-0.740948	-0.606603	-0.759506	-0.947485	-0.755306	0.151117	-0.794734	0.980935	0.87979	-0.805636	-0.470444	0.981092	0.7861	0.674847	0.744296	-0.680145	-0.918874	-0.327423	0.642081	0.464476	0.419319
TraesCS2B03G0514500	0.800072	0.850797	-0.521995	-0.750169	-0.712034	-0.781341	-0.861397	-0.774076	-0.267098	-0.792209	-0.717238	-0.788613	-0.83258	-0.65888	-0.523936	-0.82459	-0.538386	-0.631377	-0.789463	-0.789232	-0.81666	-0.78819	-0.791422	-0.782215	-0.781036	-0.788396	-0.74185	-0.804511	-0.790777	-0.582163	-0.79781	-0.969997	-0.818414	0.000227433	-0.838548	0.983159	0.914135	-0.861243	-0.558689	0.979019	0.848949	0.747423	0.788158	-0.735904	-0.947798	-0.351101	0.747109	0.527248	0.51879
TraesCS2B03G0690600	0.53424	0.73341	-0.386819	-0.503497	-0.456891	-0.505397	-0.613998	-0.509993	-0.169995	-0.515266	-0.415719	-0.520873	-0.610362	-0.41512	-0.312223	-0.585306	-0.346282	-0.362857	-0.496973	-0.506768	-0.555685	-0.569163	-0.531722	-0.497783	-0.512009	-0.525449	-0.48152	-0.555102	-0.53443	-0.511829	-0.532376	-0.818854	-0.545518	0.329314	-0.58257	0.89202	0.833418	-0.637685	-0.320006	0.896198	0.625062	0.623208	0.652132	-0.435951	-0.766929	-0.211435	0.471623	0.250948	0.22367
TraesCS2B03G1308500	0.684798	0.885948	-0.543039	-0.674801	-0.61728	-0.6803	-0.794631	-0.688951	-0.28409	-0.68629	-0.607097	-0.695605	-0.7561	-0.638967	-0.512903	-0.738053	-0.506182	-0.559381	-0.692286	-0.678962	-0.712199	-0.695531	-0.708144	-0.667966	-0.669123	-0.68901	-0.647017	-0.717405	-0.715606	-0.61461	-0.708787	-0.923236	-0.710544	0.130012	-0.74216	0.956437	0.879203	-0.777268	-0.468856	0.941603	0.740711	0.699352	0.708318	-0.622159	-0.88809	-0.34823	0.630436	0.367304	0.370571
TraesCS2D03G0055600	0.717211	0.797367	-0.497735	-0.688286	-0.647293	-0.710851	-0.794924	-0.69314	-0.2766	-0.714605	-0.635943	-0.72072	-0.783616	-0.600061	-0.501188	-0.768077	-0.513404	-0.568601	-0.705147	-0.70834	-0.745528	-0.738906	-0.731182	-0.698626	-0.704869	-0.716148	-0.669662	-0.750695	-0.72937	-0.609923	-0.733484	-0.941156	-0.738504	0.147342	-0.771294	0.97505	0.880035	-0.797763	-0.479411	0.972645	0.771975	0.677611	0.733366	-0.652751	-0.908644	-0.308187	0.639399	0.431593	0.404415
TraesCS2D03G0234900	0.80215	0.718068	-0.578448	-0.807448	-0.785845	-0.820987	-0.864783	-0.737115	-0.419588	-0.821043	-0.76296	-0.832401	-0.859221	-0.635007	-0.63791	-0.865822	-0.664561	-0.682198	-0.807116	-0.805996	-0.825418	-0.806853	-0.849068	-0.787427	-0.789033	-0.779784	-0.739402	-0.844256	-0.817936	-0.673263	-0.847037	-0.968959	-0.813084	0.0489783	-0.859342	0.973656	0.837171	-0.850654	-0.534634	0.977978	0.80819	0.653406	0.777548	-0.767557	-0.952594	-0.368838	0.660667	0.534115	0.472121
TraesCS2D03G0404700	0.846724	0.801006	-0.520636	-0.787641	-0.764591	-0.826509	-0.886505	-0.799898	-0.289995	-0.838064	-0.768121	-0.831631	-0.872556	-0.645258	-0.548112	-0.862479	-0.574651	-0.655494	-0.827073	-0.83331	-0.858611	-0.831921	-0.834998	-0.826839	-0.827498	-0.824309	-0.781354	-0.847677	-0.820849	-0.600124	-0.841892	-0.985948	-0.856207	-0.0497059	-0.877445	0.985276	0.900144	-0.895414	-0.599825	0.990963	0.877443	0.733543	0.828429	-0.78548	-0.970097	-0.336498	0.770278	0.592127	0.569626
TraesCS2D03G0812700	0.699721	0.86867	-0.510527	-0.659953	-0.607556	-0.690527	-0.795392	-0.715646	-0.239171	-0.695703	-0.61633	-0.698143	-0.779968	-0.658079	-0.500575	-0.747803	-0.47812	-0.558235	-0.696805	-0.69226	-0.734789	-0.728207	-0.710588	-0.690266	-0.694612	-0.719961	-0.6845	-0.743501	-0.735664	-0.627297	-0.714821	-0.93397	-0.733165	0.110284	-0.753614	0.961261	0.868558	-0.796681	-0.508996	0.947759	0.756177	0.671275	0.694165	-0.63711	-0.899796	-0.300523	0.655662	0.392176	0.400885
TraesCS2D03G0911500	0.640712	0.870388	-0.522809	-0.626475	-0.56928	-0.617617	-0.731926	-0.622577	-0.243382	-0.635371	-0.540378	-0.635298	-0.692968	-0.577028	-0.430783	-0.694507	-0.449896	-0.502181	-0.635055	-0.623534	-0.654351	-0.630315	-0.645841	-0.612428	-0.610466	-0.623208	-0.588015	-0.648083	-0.663675	-0.546952	-0.646917	-0.889893	-0.658824	0.168379	-0.688376	0.93911	0.895598	-0.727524	-0.418624	0.927306	0.717076	0.734787	0.703212	-0.556471	-0.848275	-0.34253	0.594171	0.328513	0.325925
TraesCS3B03G0014400	0.746004	0.780654	-0.39169	-0.629797	-0.605519	-0.733437	-0.830194	-0.816315	-0.164462	-0.7214	-0.667673	-0.724787	-0.879094	-0.636264	-0.517949	-0.742105	-0.442124	-0.511534	-0.712199	-0.73208	-0.804494	-0.852722	-0.741375	-0.751898	-0.780347	-0.817385	-0.79107	-0.83517	-0.750457	-0.743942	-0.75202	-0.934549	-0.779225	-0.00167897	-0.783754	0.914091	0.737836	-0.870407	-0.655942	0.920012	0.751044	0.47593	0.701521	-0.6995	-0.911459	-0.0987993	0.696704	0.469822	0.507474
TraesCS3B03G0141200	0.709638	0.725824	-0.504626	-0.718986	-0.679696	-0.722246	-0.782814	-0.64718	-0.342901	-0.720264	-0.647316	-0.736187	-0.75776	-0.569357	-0.522292	-0.782402	-0.565166	-0.607405	-0.707982	-0.711438	-0.735776	-0.718634	-0.743505	-0.687996	-0.690484	-0.691481	-0.625787	-0.738486	-0.71867	-0.567678	-0.741814	-0.929295	-0.727839	0.211328	-0.777099	0.978155	0.888383	-0.766878	-0.404096	0.976744	0.770072	0.690144	0.725408	-0.656291	-0.8993	-0.368206	0.602223	0.4465	0.376791
TraesCS3B03G0987700	0.578027	0.762236	-0.456908	-0.588762	-0.530687	-0.57639	-0.6716	-0.540888	-0.254797	-0.579695	-0.489308	-0.594333	-0.63573	-0.506125	-0.400804	-0.6567	-0.437988	-0.482427	-0.572447	-0.571491	-0.604088	-0.592485	-0.601275	-0.550452	-0.553631	-0.567425	-0.504436	-0.601272	-0.600589	-0.500421	-0.599303	-0.855697	-0.601435	0.328538	-0.647002	0.934857	0.883413	-0.659871	-0.300308	0.925288	0.675161	0.687152	0.645662	-0.502623	-0.809863	-0.334828	0.51026	0.294438	0.247026
TraesCS3D03G0047400	0.620556	0.874198	-0.563951	-0.640296	-0.575164	-0.625552	-0.744426	-0.621726	-0.30873	-0.631813	-0.548207	-0.645337	-0.703081	-0.622124	-0.505905	-0.700017	-0.499825	-0.533055	-0.638716	-0.618723	-0.650087	-0.633062	-0.663395	-0.603335	-0.602319	-0.623057	-0.586338	-0.664108	-0.679069	-0.613258	-0.660236	-0.892317	-0.649503	0.208997	-0.688987	0.9403	0.861863	-0.71868	-0.403334	0.920047	0.682686	0.683587	0.657899	-0.559133	-0.850791	-0.365168	0.555477	0.287224	0.281684
TraesCS3D03G0413100	0.911536	0.751019	-0.505632	-0.820986	-0.812842	-0.908132	-0.944513	-0.903681	-0.293439	-0.907215	-0.865977	-0.899714	-0.963005	-0.732381	-0.639991	-0.911276	-0.612413	-0.719026	-0.898837	-0.910423	-0.943207	-0.932606	-0.907009	-0.917294	-0.922949	-0.929092	-0.89895	-0.952564	-0.900701	-0.68514	-0.917835	-0.991982	-0.93447	-0.206773	-0.939863	0.94505	0.797027	-0.960108	-0.730081	0.950402	0.895505	0.613564	0.794248	-0.88621	-0.993214	-0.275882	0.834552	0.681065	0.678719
TraesCS3D03G0949700	0.853423	0.743408	-0.370633	-0.697801	-0.698699	-0.796987	-0.860744	-0.844194	-0.13218	-0.808343	-0.740231	-0.788139	-0.902569	-0.562511	-0.446048	-0.805618	-0.448013	-0.535477	-0.78278	-0.815529	-0.869908	-0.886055	-0.789456	-0.833332	-0.853833	-0.857741	-0.829107	-0.858254	-0.776825	-0.620813	-0.805503	-0.960792	-0.854418	-0.133487	-0.851193	0.932809	0.821974	-0.926871	-0.702885	0.959842	0.867709	0.616794	0.84891	-0.77363	-0.946812	-0.128714	0.803174	0.631352	0.645674
TraesCS4A03G0180900	0.671771	0.849963	-0.583949	-0.693408	-0.634879	-0.694128	-0.796537	-0.67687	-0.355117	-0.691635	-0.621247	-0.709812	-0.768463	-0.674012	-0.58472	-0.757373	-0.562752	-0.597365	-0.69762	-0.679984	-0.712522	-0.701828	-0.731056	-0.665299	-0.666402	-0.688109	-0.650705	-0.73954	-0.741236	-0.676194	-0.727623	-0.927517	-0.706727	0.172993	-0.747945	0.959983	0.842327	-0.766978	-0.45486	0.940233	0.712337	0.645836	0.663951	-0.630531	-0.89319	-0.366344	0.585963	0.3432	0.328781
TraesCS4A03G0266600	0.643893	0.918222	-0.639033	-0.673594	-0.606378	-0.665008	-0.79076	-0.680542	-0.361539	-0.668388	-0.598337	-0.683199	-0.756316	-0.721154	-0.608127	-0.731198	-0.555812	-0.580953	-0.685566	-0.652155	-0.683836	-0.668522	-0.712455	-0.64265	-0.639554	-0.667833	-0.654665	-0.720531	-0.744005	-0.716837	-0.707999	-0.904296	-0.68259	0.11087	-0.7168	0.921875	0.801418	-0.753606	-0.486175	0.892281	0.668272	0.629598	0.630508	-0.606351	-0.869325	-0.37351	0.572946	0.281233	0.303736
TraesCS4A03G0679200	0.647082	0.871717	-0.611008	-0.692568	-0.627592	-0.679069	-0.795822	-0.663352	-0.390479	-0.673263	-0.608117	-0.699776	-0.753477	-0.676513	-0.611164	-0.737749	-0.581691	-0.59183	-0.686817	-0.659848	-0.68918	-0.677802	-0.724286	-0.640784	-0.64149	-0.665376	-0.626884	-0.721892	-0.724767	-0.696471	-0.717749	-0.911022	-0.681001	0.181666	-0.729421	0.941968	0.82114	-0.748983	-0.435185	0.918126	0.678646	0.63069	0.650381	-0.613285	-0.876225	-0.386805	0.556115	0.302232	0.295232
TraesCS4A03G1138500	0.774028	0.810091	-0.429083	-0.68873	-0.658125	-0.743103	-0.829552	-0.763004	-0.19294	-0.748784	-0.672448	-0.746039	-0.824637	-0.585594	-0.456942	-0.776219	-0.467542	-0.551995	-0.737352	-0.752684	-0.797121	-0.796434	-0.747033	-0.752783	-0.764624	-0.777335	-0.725183	-0.785217	-0.737067	-0.583923	-0.756119	-0.954487	-0.788543	0.0445229	-0.805486	0.970683	0.889727	-0.853258	-0.556854	0.977861	0.827197	0.685914	0.790107	-0.698313	-0.928019	-0.247047	0.727065	0.515065	0.511549
TraesCS4B03G0915000	0.504759	0.753499	-0.454907	-0.529271	-0.462949	-0.516735	-0.622745	-0.497217	-0.252191	-0.514005	-0.42589	-0.534319	-0.598397	-0.512814	-0.402972	-0.604512	-0.409579	-0.442207	-0.510169	-0.504785	-0.545911	-0.549356	-0.549568	-0.48679	-0.493086	-0.518974	-0.466027	-0.562402	-0.566657	-0.539017	-0.545369	-0.819576	-0.54036	0.39297	-0.586907	0.903765	0.826609	-0.608226	-0.266577	0.886566	0.599039	0.611482	0.562456	-0.438819	-0.76805	-0.302899	0.436873	0.201317	0.163128
TraesCS4B03G1005300	0.658314	0.748331	-0.516328	-0.673617	-0.628502	-0.674062	-0.754527	-0.623326	-0.339376	-0.670851	-0.596028	-0.689581	-0.740016	-0.569822	-0.523809	-0.740156	-0.541731	-0.559438	-0.661056	-0.659204	-0.692533	-0.689795	-0.705943	-0.639975	-0.646498	-0.655863	-0.604978	-0.711225	-0.693278	-0.622454	-0.702384	-0.911222	-0.680698	0.247024	-0.730486	0.959462	0.848363	-0.740412	-0.399167	0.954581	0.71069	0.636969	0.686275	-0.605287	-0.874961	-0.331133	0.549361	0.365221	0.313244
TraesCS4D03G0736900	0.585625	0.871728	-0.483011	-0.567344	-0.496056	-0.590679	-0.714629	-0.636355	-0.20915	-0.588096	-0.50866	-0.599537	-0.691293	-0.65025	-0.461046	-0.657452	-0.411999	-0.498414	-0.598483	-0.587526	-0.636391	-0.638909	-0.614427	-0.584982	-0.590085	-0.633209	-0.593823	-0.654738	-0.659124	-0.604934	-0.616495	-0.869688	-0.636162	0.222232	-0.658002	0.918515	0.828218	-0.703349	-0.415396	0.891152	0.661971	0.617213	0.577544	-0.529807	-0.826502	-0.289233	0.563974	0.263537	0.282849
TraesCS5A03G0248600	0.741165	0.762799	-0.566511	-0.730674	-0.695112	-0.773527	-0.840579	-0.753584	-0.367267	-0.763391	-0.710801	-0.776903	-0.861158	-0.716093	-0.655749	-0.819337	-0.605769	-0.646924	-0.758838	-0.754156	-0.795815	-0.805131	-0.80417	-0.750987	-0.759151	-0.779875	-0.758636	-0.843387	-0.818493	-0.76395	-0.803743	-0.953384	-0.781219	0.0727263	-0.812921	0.950733	0.76621	-0.832798	-0.567917	0.939841	0.741015	0.542042	0.663065	-0.72241	-0.931406	-0.292717	0.629093	0.438222	0.418558
TraesCS5A03G0434000	0.611121	0.834862	-0.549565	-0.639546	-0.575961	-0.625964	-0.735688	-0.605693	-0.323984	-0.62633	-0.545987	-0.645294	-0.69954	-0.607785	-0.512864	-0.700485	-0.510267	-0.537884	-0.630017	-0.61397	-0.646505	-0.635441	-0.663552	-0.595581	-0.596919	-0.617526	-0.573055	-0.665052	-0.672079	-0.615856	-0.659176	-0.8908	-0.642179	0.256013	-0.687712	0.945378	0.854937	-0.707904	-0.376855	0.926593	0.674828	0.660753	0.644039	-0.555569	-0.848876	-0.361212	0.532519	0.285915	0.263488
TraesCS5A03G0564300	0.673917	0.66437	-0.552239	-0.716785	-0.684309	-0.707739	-0.759761	-0.608921	-0.425257	-0.701643	-0.637243	-0.72462	-0.757064	-0.561475	-0.588274	-0.773917	-0.617995	-0.60171	-0.685176	-0.682553	-0.706987	-0.70253	-0.747208	-0.657284	-0.662415	-0.658582	-0.614082	-0.739	-0.719362	-0.656049	-0.739755	-0.906385	-0.690324	0.235349	-0.751529	0.944552	0.802558	-0.738923	-0.398351	0.944869	0.699549	0.595734	0.685434	-0.638158	-0.876779	-0.351837	0.517224	0.393277	0.310495
TraesCS5A03G0864400	0.634234	0.828082	-0.521237	-0.641079	-0.582401	-0.630718	-0.731074	-0.607124	-0.281164	-0.63921	-0.550286	-0.648219	-0.692373	-0.582412	-0.460152	-0.708859	-0.481801	-0.533883	-0.637591	-0.6283	-0.657603	-0.636284	-0.658728	-0.611025	-0.6096	-0.623348	-0.574928	-0.657956	-0.669099	-0.550677	-0.657582	-0.895153	-0.659123	0.232604	-0.698036	0.954669	0.895794	-0.716061	-0.37898	0.940771	0.714384	0.716472	0.677881	-0.563206	-0.853906	-0.364022	0.569935	0.330391	0.30261
TraesCS5A03G0968800	0.92164	0.763655	-0.477378	-0.803147	-0.802593	-0.900252	-0.949668	-0.926368	-0.253596	-0.903078	-0.862235	-0.891125	-0.975055	-0.698084	-0.61187	-0.889433	-0.580874	-0.672395	-0.893483	-0.908168	-0.946587	-0.944776	-0.898153	-0.921595	-0.932716	-0.93755	-0.914995	-0.951815	-0.882556	-0.696428	-0.911241	-0.982114	-0.933405	-0.271702	-0.932274	0.91934	0.773025	-0.978734	-0.777366	0.933109	0.892163	0.593611	0.830592	-0.88612	-0.984897	-0.219667	0.853735	0.692497	0.713436
TraesCS5A03G1126300	0.583575	0.807345	-0.504808	-0.604687	-0.542127	-0.588564	-0.696397	-0.565076	-0.286035	-0.591309	-0.504215	-0.608276	-0.658859	-0.551215	-0.44971	-0.66763	-0.4663	-0.497639	-0.590297	-0.580386	-0.613575	-0.602858	-0.621628	-0.560739	-0.563185	-0.581083	-0.528904	-0.62167	-0.62647	-0.558697	-0.618118	-0.868184	-0.610098	0.299985	-0.656015	0.936628	0.868169	-0.676377	-0.3323	0.921986	0.665117	0.674118	0.642294	-0.515676	-0.822706	-0.345654	0.512195	0.273828	0.242456
TraesCS5B03G0149900	0.550363	0.748201	-0.486276	-0.585698	-0.525635	-0.566493	-0.664938	-0.523825	-0.304427	-0.563399	-0.479571	-0.586714	-0.636103	-0.5164	-0.448221	-0.648108	-0.469099	-0.482432	-0.557825	-0.55139	-0.58603	-0.584208	-0.602382	-0.528331	-0.533921	-0.550618	-0.494172	-0.602131	-0.599546	-0.561277	-0.596606	-0.847592	-0.577438	0.363732	-0.631526	0.924097	0.840175	-0.643564	-0.288485	0.91183	0.630943	0.630485	0.612596	-0.488504	-0.800517	-0.331349	0.459409	0.248531	0.197852
TraesCS5B03G1309300	0.805556	0.771146	-0.509251	-0.772409	-0.74313	-0.798715	-0.85636	-0.748566	-0.311477	-0.803755	-0.733421	-0.807058	-0.834239	-0.616746	-0.539287	-0.841563	-0.577035	-0.648789	-0.792278	-0.798989	-0.822755	-0.797867	-0.809454	-0.784412	-0.785612	-0.783473	-0.725125	-0.813471	-0.786345	-0.577309	-0.813352	-0.972163	-0.818288	0.0533448	-0.851315	0.992607	0.909858	-0.853733	-0.521801	0.996043	0.851393	0.729538	0.798688	-0.747685	-0.951731	-0.357679	0.718034	0.553227	0.508034
TraesCS5B03G1309400	0.611318	0.818531	-0.47864	-0.61011	-0.54993	-0.605138	-0.711566	-0.592596	-0.248477	-0.610051	-0.521459	-0.621992	-0.67185	-0.551344	-0.425293	-0.677812	-0.446623	-0.501012	-0.60851	-0.60356	-0.637554	-0.623834	-0.629314	-0.586797	-0.589307	-0.607271	-0.549691	-0.634241	-0.633841	-0.529225	-0.628975	-0.878528	-0.636393	0.263168	-0.67515	0.944353	0.891437	-0.698955	-0.355843	0.932079	0.700082	0.700948	0.667339	-0.536846	-0.835199	-0.337164	0.557275	0.315095	0.289943
TraesCS5B03G1367500	0.748016	0.817226	-0.606983	-0.736412	-0.698889	-0.7778	-0.863028	-0.784803	-0.378695	-0.770689	-0.721583	-0.782728	-0.881485	-0.751062	-0.689371	-0.816926	-0.616808	-0.642798	-0.77352	-0.759078	-0.801426	-0.810976	-0.815873	-0.76046	-0.768154	-0.792033	-0.787446	-0.856322	-0.835415	-0.815913	-0.815106	-0.952685	-0.78652	-0.0012107	-0.813633	0.93069	0.736171	-0.85137	-0.620994	0.916713	0.726333	0.525791	0.668891	-0.73262	-0.932647	-0.287043	0.641317	0.420667	0.430844
TraesCS5D03G0169500	0.538047	0.771871	-0.480085	-0.568558	-0.503975	-0.547501	-0.653412	-0.516564	-0.278891	-0.54754	-0.459401	-0.568031	-0.617445	-0.516056	-0.421843	-0.631953	-0.442637	-0.467753	-0.544633	-0.536569	-0.571041	-0.564984	-0.581475	-0.514626	-0.51843	-0.537566	-0.481058	-0.581085	-0.58588	-0.535887	-0.576687	-0.838763	-0.566264	0.362627	-0.616383	0.919393	0.85238	-0.632619	-0.279653	0.904412	0.628487	0.650865	0.606329	-0.470063	-0.789786	-0.335273	0.463608	0.233945	0.192316
TraesCS5D03G0230900	0.711126	0.853883	-0.487888	-0.676422	-0.626255	-0.699451	-0.803253	-0.708355	-0.246337	-0.702686	-0.624719	-0.710412	-0.771895	-0.612571	-0.483388	-0.747494	-0.486839	-0.557344	-0.702902	-0.701582	-0.738798	-0.72787	-0.716102	-0.692443	-0.697822	-0.716621	-0.661983	-0.734706	-0.713468	-0.58578	-0.719776	-0.933412	-0.734515	0.125905	-0.76282	0.967515	0.894674	-0.797561	-0.47923	0.959925	0.774448	0.700962	0.733179	-0.643958	-0.900554	-0.317718	0.662631	0.419977	0.415344
TraesCS5D03G0561000	0.730258	0.876958	-0.528243	-0.668186	-0.626151	-0.717956	-0.827087	-0.771716	-0.241785	-0.723575	-0.651518	-0.721518	-0.839104	-0.688793	-0.546355	-0.763759	-0.492682	-0.553257	-0.723184	-0.71849	-0.770049	-0.779097	-0.743251	-0.727503	-0.737495	-0.764935	-0.754483	-0.795724	-0.774585	-0.72269	-0.748712	-0.947121	-0.761888	0.0158398	-0.774099	0.943137	0.808185	-0.842481	-0.608358	0.934226	0.749939	0.602935	0.707607	-0.674229	-0.917509	-0.238426	0.676616	0.408306	0.442369
TraesCS5D03G1068400	0.807446	0.846249	-0.504093	-0.735681	-0.702671	-0.783024	-0.863594	-0.795055	-0.239065	-0.793983	-0.719468	-0.786186	-0.853388	-0.662828	-0.519017	-0.822912	-0.519044	-0.614456	-0.787996	-0.792475	-0.828146	-0.810981	-0.791475	-0.792895	-0.795984	-0.80661	-0.769682	-0.821548	-0.798902	-0.612214	-0.799851	-0.974521	-0.827146	-0.0256239	-0.840273	0.978025	0.892225	-0.877824	-0.59912	0.977	0.847951	0.713413	0.787557	-0.741835	-0.952666	-0.302589	0.757623	0.533937	0.536605
TraesCS6B03G0877600	0.610497	0.86989	-0.529397	-0.614429	-0.548058	-0.612828	-0.732183	-0.624012	-0.268471	-0.616887	-0.532777	-0.628831	-0.697414	-0.62263	-0.480377	-0.685822	-0.464946	-0.517729	-0.623347	-0.608263	-0.645777	-0.635223	-0.644679	-0.597029	-0.598356	-0.625521	-0.58616	-0.658712	-0.669059	-0.601457	-0.643627	-0.886841	-0.64545	0.220356	-0.679009	0.937656	0.859175	-0.713903	-0.40347	0.916426	0.681119	0.668914	0.63754	-0.547728	-0.844141	-0.337334	0.560489	0.283945	0.283961
TraesCS6D03G0772500	0.675903	0.922786	-0.586086	-0.673145	-0.611339	-0.677304	-0.803148	-0.704721	-0.303535	-0.683815	-0.608924	-0.693021	-0.766472	-0.686301	-0.553977	-0.734519	-0.519457	-0.564278	-0.696878	-0.673642	-0.707873	-0.692242	-0.712931	-0.666593	-0.666229	-0.691814	-0.666782	-0.725857	-0.734196	-0.667788	-0.712526	-0.917243	-0.706957	0.0862907	-0.734926	0.936394	0.841402	-0.779764	-0.503006	0.914802	0.713851	0.669072	0.681833	-0.622602	-0.883127	-0.348986	0.623665	0.33456	0.359891
TraesCS7A03G0398900	0.55699	0.836104	-0.484973	-0.568837	-0.496069	-0.566353	-0.684073	-0.573282	-0.244099	-0.564456	-0.480452	-0.581878	-0.644675	-0.592628	-0.439831	-0.642676	-0.426113	-0.490697	-0.571617	-0.559772	-0.599193	-0.592551	-0.594059	-0.545586	-0.547988	-0.581135	-0.527986	-0.610115	-0.619788	-0.554021	-0.592556	-0.852586	-0.599085	0.301457	-0.635473	0.922006	0.853022	-0.661482	-0.332534	0.897217	0.647479	0.650742	0.584362	-0.496052	-0.806069	-0.332346	0.516494	0.243045	0.232546
TraesCS7A03G0474100	0.614817	0.706946	-0.391991	-0.577584	-0.533365	-0.614688	-0.691898	-0.604026	-0.202474	-0.608566	-0.528535	-0.619196	-0.700755	-0.530795	-0.412648	-0.679426	-0.416259	-0.48683	-0.592731	-0.609019	-0.659926	-0.676257	-0.627628	-0.602264	-0.616175	-0.639612	-0.582404	-0.670576	-0.638386	-0.558531	-0.630719	-0.876349	-0.649055	0.287435	-0.680912	0.936185	0.834811	-0.70781	-0.383373	0.933069	0.696058	0.5936	0.629136	-0.550116	-0.835743	-0.233139	0.549015	0.352846	0.311744
TraesCS7A03G0546400	0.936167	0.738678	-0.426221	-0.818548	-0.819323	-0.913266	-0.958752	-0.92184	-0.245243	-0.910468	-0.873799	-0.906265	-0.961457	-0.644125	-0.58047	-0.886454	-0.579742	-0.675973	-0.901076	-0.922577	-0.955246	-0.948398	-0.901147	-0.927244	-0.94005	-0.940143	-0.885322	-0.940774	-0.850775	-0.62393	-0.914711	-0.978109	-0.939365	-0.247352	-0.945952	0.926608	0.80981	-0.978038	-0.732812	0.9464	0.922281	0.630023	0.868478	-0.897387	-0.983545	-0.239464	0.872804	0.738108	0.741743
TraesCS7A03G0941200	0.633796	0.742933	-0.532185	-0.66566	-0.617669	-0.653514	-0.734883	-0.592357	-0.358397	-0.651422	-0.574589	-0.671958	-0.715961	-0.560232	-0.523588	-0.727161	-0.54646	-0.55264	-0.642131	-0.63632	-0.666411	-0.660357	-0.690434	-0.613797	-0.618286	-0.62578	-0.576851	-0.687454	-0.678645	-0.617132	-0.684844	-0.897709	-0.655599	0.27643	-0.710071	0.952221	0.844068	-0.715058	-0.368384	0.945324	0.688144	0.638672	0.670757	-0.581038	-0.85925	-0.34848	0.517686	0.334532	0.276541
TraesCS7A03G1041100	0.701367	0.842701	-0.54738	-0.696071	-0.644643	-0.700314	-0.794232	-0.680247	-0.305126	-0.707234	-0.626463	-0.714536	-0.763968	-0.633263	-0.520829	-0.765878	-0.529818	-0.585336	-0.706008	-0.697233	-0.727019	-0.706798	-0.726854	-0.683666	-0.683116	-0.695752	-0.652913	-0.732435	-0.733825	-0.605523	-0.727065	-0.9356	-0.726133	0.147651	-0.76101	0.973278	0.89146	-0.781	-0.459876	0.9616	0.759423	0.709694	0.715852	-0.639763	-0.901643	-0.362058	0.629261	0.396665	0.376125
TraesCS7B03G0073300	0.575573	0.841153	-0.576833	-0.59577	-0.533905	-0.576376	-0.687815	-0.570005	-0.300279	-0.590644	-0.496799	-0.595013	-0.672375	-0.608189	-0.482496	-0.675107	-0.472621	-0.494884	-0.589187	-0.569209	-0.604575	-0.592441	-0.62201	-0.559203	-0.557096	-0.575306	-0.56495	-0.631036	-0.66589	-0.630596	-0.618002	-0.869637	-0.606591	0.241084	-0.642624	0.92129	0.828935	-0.679541	-0.39192	0.901068	0.636203	0.651701	0.615069	-0.507563	-0.822475	-0.334816	0.498464	0.231058	0.221314
TraesCS7B03G0271100	0.749472	0.683149	-0.544025	-0.769007	-0.742109	-0.774278	-0.817085	-0.676587	-0.410162	-0.769858	-0.708389	-0.787568	-0.807147	-0.589386	-0.597898	-0.826937	-0.636458	-0.651337	-0.753825	-0.756046	-0.77659	-0.762045	-0.801838	-0.73212	-0.73527	-0.727984	-0.673824	-0.793666	-0.766295	-0.632373	-0.798156	-0.943344	-0.763021	0.152297	-0.816966	0.970738	0.843693	-0.799129	-0.453987	0.974221	0.775888	0.646447	0.742424	-0.712264	-0.921143	-0.36906	0.606228	0.488808	0.408648
TraesCS7B03G0786000	0.522585	0.650363	-0.490349	-0.602073	-0.545985	-0.561936	-0.634917	-0.458902	-0.380514	-0.551495	-0.476252	-0.58658	-0.598771	-0.470358	-0.472719	-0.646243	-0.520785	-0.506251	-0.541818	-0.535301	-0.55797	-0.55081	-0.602236	-0.498566	-0.501979	-0.507783	-0.436539	-0.578184	-0.574599	-0.531259	-0.591266	-0.817255	-0.545693	0.436986	-0.618589	0.906572	0.816581	-0.594912	-0.203963	0.896445	0.600966	0.608469	0.586015	-0.475822	-0.772724	-0.37638	0.392454	0.243581	0.148121
TraesCS7B03G1059600	0.808466	0.700613	-0.515945	-0.792432	-0.778223	-0.818498	-0.872159	-0.752577	-0.386588	-0.812894	-0.76106	-0.829641	-0.868114	-0.573427	-0.60829	-0.839729	-0.639315	-0.637776	-0.797105	-0.804553	-0.830787	-0.827711	-0.841837	-0.787219	-0.798532	-0.78937	-0.735757	-0.84339	-0.780518	-0.670712	-0.841236	-0.959304	-0.808223	0.0361716	-0.856128	0.957186	0.819819	-0.864241	-0.546627	0.972632	0.80737	0.620507	0.815622	-0.768731	-0.944683	-0.310526	0.669481	0.555737	0.501648
TraesCS7D03G0069600	0.789147	0.82494	-0.481329	-0.730555	-0.693978	-0.769688	-0.847304	-0.763604	-0.24276	-0.776637	-0.701731	-0.77516	-0.824128	-0.631064	-0.497705	-0.810078	-0.515177	-0.611912	-0.770504	-0.777304	-0.809618	-0.789579	-0.775313	-0.770681	-0.773605	-0.783083	-0.727785	-0.795652	-0.769508	-0.56751	-0.782534	-0.964817	-0.808186	0.0368514	-0.829007	0.984742	0.914612	-0.852856	-0.540357	0.983819	0.845925	0.731432	0.782666	-0.722649	-0.941067	-0.324253	0.738103	0.527712	0.512819
TraesCS7D03G0286800	0.771792	0.727325	-0.622715	-0.789126	-0.765447	-0.786856	-0.83158	-0.698621	-0.432581	-0.796754	-0.728351	-0.800697	-0.832926	-0.640999	-0.632479	-0.854203	-0.65977	-0.666073	-0.780597	-0.772524	-0.789511	-0.764644	-0.824708	-0.755427	-0.751997	-0.738996	-0.720974	-0.81525	-0.816402	-0.684215	-0.820966	-0.956869	-0.782764	0.0607265	-0.82791	0.964814	0.829148	-0.822339	-0.524052	0.965639	0.777349	0.6621	0.755045	-0.730699	-0.935823	-0.381096	0.622921	0.483412	0.422375
TraesCS7D03G0383800	0.524463	0.847836	-0.493	-0.533405	-0.461129	-0.514418	-0.639789	-0.526875	-0.218933	-0.526189	-0.42814	-0.533554	-0.599298	-0.550098	-0.383059	-0.606821	-0.386252	-0.438487	-0.530009	-0.514851	-0.551311	-0.536629	-0.547245	-0.502173	-0.501026	-0.526857	-0.489467	-0.554978	-0.583838	-0.519077	-0.545686	-0.825581	-0.556772	0.299237	-0.590048	0.900183	0.857794	-0.627844	-0.313827	0.877734	0.622211	0.68204	0.591271	-0.443804	-0.773994	-0.328464	0.48956	0.202393	0.19855
TraesCS7D03G0446000	0.625705	0.886707	-0.533261	-0.628325	-0.56261	-0.623667	-0.748035	-0.637308	-0.27137	-0.629083	-0.545848	-0.641387	-0.704309	-0.617126	-0.481516	-0.690282	-0.472034	-0.520091	-0.637553	-0.620963	-0.655703	-0.641168	-0.655188	-0.608391	-0.609341	-0.634	-0.591459	-0.662926	-0.669732	-0.594804	-0.654299	-0.890628	-0.655172	0.193089	-0.689362	0.937478	0.868529	-0.726411	-0.413725	0.918033	0.693619	0.687268	0.664063	-0.560409	-0.849598	-0.346382	0.578281	0.299731	0.304598
TraesCS7D03G0906100	0.679957	0.825758	-0.575403	-0.695262	-0.643329	-0.690858	-0.783406	-0.658627	-0.346221	-0.695338	-0.61694	-0.707185	-0.759585	-0.637034	-0.552548	-0.762412	-0.55515	-0.586694	-0.693501	-0.680596	-0.710236	-0.694492	-0.726415	-0.664931	-0.664791	-0.676883	-0.641414	-0.72912	-0.734241	-0.644637	-0.723545	-0.929403	-0.706321	0.178129	-0.747998	0.967124	0.86381	-0.764649	-0.445739	0.953885	0.727323	0.676216	0.692609	-0.626324	-0.894023	-0.365901	0.586951	0.362311	0.334497
TraesCS1A03G0891800	-0.61997	-0.736547	0.600381	0.770571	0.699096	0.704761	0.786743	0.565776	0.549622	0.674848	0.638399	0.739775	0.667768	0.591651	0.662474	0.739516	0.704716	0.685765	0.698491	0.665272	0.656715	0.613326	0.746529	0.605224	0.597239	0.603333	0.487832	0.668876	0.657753	0.545403	0.729842	0.851977	0.644094	-0.311171	0.737297	-0.917671	-0.838764	0.663654	0.22164	-0.891519	-0.668	-0.671019	-0.633463	0.623113	0.828315	0.565474	-0.48401	-0.340315	-0.248139
TraesCS1B03G0956400	0.170885	-0.342024	0.054871	-0.0980489	-0.15974	-0.17668	-0.000945193	-0.124446	0.0350198	-0.191926	-0.265791	-0.137798	-0.0165975	-0.162012	-0.0746767	-0.111507	-0.0529891	-0.255586	-0.199407	-0.202694	-0.142031	-0.0547499	-0.112819	-0.225013	-0.183995	-0.153342	-0.19748	-0.110871	-0.166315	0.270934	-0.130376	0.2015	-0.184558	-0.741653	-0.109991	-0.330392	-0.30022	-0.0071219	-0.236561	-0.339053	0.0831343	-0.104348	-0.166112	-0.261154	0.122734	-0.0707445	0.230238	0.4054	0.412751
TraesCS1D03G0390800	-0.369857	-0.528223	0.106163	0.375509	0.324567	0.452157	0.608313	0.550351	0.202278	0.358771	0.396453	0.461503	0.565858	0.324445	0.459216	0.338843	0.339635	0.267761	0.395331	0.404229	0.476281	0.587534	0.46466	0.387637	0.448009	0.523186	0.381238	0.524085	0.310511	0.612941	0.459125	0.55885	0.401158	-0.263608	0.463983	-0.559578	-0.368729	0.529284	0.261426	-0.559486	-0.347285	-0.0538413	-0.398892	0.409806	0.543522	0.00156136	-0.325139	-0.172917	-0.216007
TraesCS2A03G0080500	-0.815935	-0.763677	0.492306	0.832449	0.789821	0.875308	0.947721	0.837508	0.413736	0.83557	0.831947	0.884319	0.869131	0.701056	0.709398	0.832273	0.681833	0.747495	0.862636	0.852946	0.866916	0.849764	0.879473	0.825242	0.83198	0.854661	0.742871	0.871498	0.788326	0.622107	0.879209	0.917871	0.845609	0.0491677	0.892974	-0.900887	-0.777286	0.864758	0.52618	-0.887852	-0.811544	-0.584967	-0.720169	0.83676	0.922013	0.409286	-0.739497	-0.589891	-0.571509
TraesCS2A03G0408900	-0.603484	-0.762761	0.339742	0.5812	0.547947	0.600247	0.769035	0.662761	0.265824	0.571106	0.540565	0.625846	0.719485	0.352184	0.465035	0.549997	0.455985	0.343443	0.582731	0.582639	0.633419	0.685855	0.634045	0.564991	0.606213	0.626382	0.537682	0.641471	0.490716	0.658398	0.630241	0.784535	0.5794	-0.108143	0.640309	-0.779739	-0.66524	0.735038	0.439165	-0.803576	-0.588109	-0.438203	-0.771176	0.553016	0.759026	0.132944	-0.519232	-0.327712	-0.364627
TraesCS2A03G0608600	-0.944838	-0.628364	0.355412	0.852107	0.868732	0.92532	0.958363	0.888802	0.293398	0.913219	0.903751	0.927441	0.91244	0.497438	0.561271	0.846896	0.618782	0.664985	0.9085	0.931801	0.940012	0.918557	0.905435	0.916715	0.931177	0.908846	0.809414	0.896054	0.761516	0.500116	0.916116	0.894643	0.913554	0.319521	0.940414	-0.831883	-0.7593	0.944474	0.664935	-0.868967	-0.911231	-0.62236	-0.930893	0.917234	0.916886	0.274616	-0.863266	-0.818605	-0.798247
TraesCS2A03G0735800	-0.593843	-0.678417	0.708156	0.686236	0.660123	0.566256	0.610565	0.413706	0.462267	0.626816	0.520628	0.605213	0.555984	0.445233	0.453483	0.696982	0.58786	0.524793	0.60807	0.568634	0.536953	0.439818	0.630482	0.53286	0.498263	0.438565	0.463396	0.526282	0.635029	0.433966	0.618429	0.761106	0.560429	-0.0611672	0.615419	-0.79973	-0.804553	0.589454	0.315195	-0.800131	-0.624092	-0.807217	-0.718298	0.504687	0.73066	0.518542	-0.438239	-0.309159	-0.229445
TraesCS2A03G0767000	-0.186007	-0.541892	0.457057	0.41878	0.320906	0.339761	0.470104	0.260511	0.526683	0.2672	0.269677	0.379386	0.374438	0.429635	0.593425	0.360231	0.524926	0.394099	0.311318	0.262107	0.281895	0.316154	0.412419	0.203355	0.218371	0.271134	0.165955	0.36705	0.329136	0.597796	0.382453	0.52769	0.241025	-0.605664	0.354657	-0.612287	-0.443475	0.310694	-0.0521443	-0.565348	-0.204545	-0.210262	-0.211409	0.24582	0.487938	0.37124	-0.0448531	0.114524	0.173752
TraesCS2A03G0873900	-0.937972	-0.624852	0.492382	0.918103	0.909899	0.980673	0.969072	0.881946	0.414412	0.959382	0.95949	0.977137	0.914078	0.723315	0.713377	0.941356	0.729179	0.859292	0.968482	0.972056	0.963035	0.908584	0.962733	0.949383	0.940502	0.932702	0.839709	0.946701	0.888705	0.519618	0.969184	0.920398	0.95854	0.26208	0.985263	-0.874013	-0.770468	0.913752	0.617153	-0.871876	-0.919262	-0.641161	-0.76043	0.963287	0.9468	0.448535	-0.850074	-0.796928	-0.741147
TraesCS2D03G0196100	-0.960653	-0.586786	0.533283	0.955978	0.962199	0.978234	0.946358	0.832842	0.450413	0.980551	0.9724	0.983379	0.864598	0.647101	0.672721	0.946743	0.75571	0.862068	0.984632	0.980574	0.942223	0.846278	0.963022	0.948452	0.92505	0.883957	0.801895	0.897655	0.869446	0.405378	0.968263	0.8763	0.949539	0.374246	0.978984	-0.8226	-0.783232	0.888294	0.59872	-0.830522	-0.935841	-0.741899	-0.83184	0.967668	0.910489	0.526367	-0.858745	-0.84949	-0.776478
TraesCS2D03G0868600	-0.871063	-0.591657	0.445423	0.858355	0.837931	0.939205	0.925424	0.860269	0.385093	0.902009	0.919318	0.929122	0.867912	0.764964	0.717307	0.888923	0.688546	0.858659	0.923283	0.924809	0.920655	0.874822	0.913082	0.905016	0.89655	0.910203	0.807175	0.915328	0.857828	0.499169	0.920188	0.859842	0.917422	0.234334	0.937451	-0.815786	-0.697524	0.854591	0.575009	-0.798073	-0.857879	-0.551992	-0.627554	0.924693	0.888946	0.434344	-0.81243	-0.745207	-0.70119
TraesCS2D03G1118600	-0.886546	-0.737898	0.490336	0.863141	0.844802	0.911571	0.968208	0.863719	0.392936	0.889444	0.869401	0.919187	0.921099	0.643324	0.67366	0.878134	0.68395	0.727095	0.895435	0.898917	0.91521	0.89953	0.915862	0.87776	0.887489	0.888359	0.797673	0.910887	0.819549	0.635861	0.918573	0.962995	0.892009	0.11237	0.93446	-0.934198	-0.812083	0.92514	0.602121	-0.94274	-0.87158	-0.62776	-0.835031	0.877456	0.967261	0.359357	-0.784921	-0.669275	-0.639749
TraesCS2D03G1134400	-0.915198	-0.716671	0.642936	0.916777	0.896841	0.955794	0.951296	0.859854	0.456784	0.955514	0.928544	0.954327	0.921595	0.834631	0.75975	0.976261	0.750842	0.879364	0.961905	0.947479	0.940043	0.87391	0.961354	0.933127	0.91201	0.9053	0.87048	0.950273	0.963318	0.61901	0.964971	0.963705	0.950554	0.237281	0.969664	-0.922038	-0.795896	0.909118	0.651474	-0.904153	-0.896161	-0.683222	-0.718581	0.930158	0.977298	0.491362	-0.813919	-0.697605	-0.652995
TraesCS2D03G1170700	-0.943586	-0.711365	0.522288	0.910782	0.904694	0.950004	0.974317	0.86853	0.397737	0.946391	0.917224	0.956322	0.924414	0.64828	0.656716	0.930778	0.705377	0.775957	0.944738	0.948688	0.947424	0.899696	0.947695	0.926996	0.923717	0.904108	0.82669	0.923947	0.86355	0.5604	0.952924	0.969066	0.938496	0.213757	0.972077	-0.933514	-0.848334	0.942322	0.63093	-0.945957	-0.931978	-0.71759	-0.879693	0.923405	0.980598	0.415778	-0.840714	-0.754606	-0.708556
TraesCS3B03G0008000	-0.860845	-0.628722	0.690979	0.980244	0.950485	0.941375	0.918189	0.729856	0.629559	0.931427	0.921846	0.96063	0.804742	0.743741	0.799515	0.954442	0.867615	0.940928	0.950244	0.916806	0.865343	0.755033	0.956591	0.862064	0.826132	0.795038	0.707865	0.855469	0.882733	0.473615	0.948044	0.885222	0.877532	0.137279	0.940387	-0.875102	-0.80794	0.799778	0.438721	-0.852597	-0.852108	-0.754207	-0.708165	0.899881	0.905853	0.691389	-0.713895	-0.679353	-0.566021
TraesCS3B03G0465000	-0.864887	-0.588511	0.161747	0.662332	0.674605	0.851258	0.889998	0.952543	0.0543594	0.814187	0.821831	0.820454	0.929173	0.591444	0.494214	0.751355	0.412179	0.571274	0.811838	0.861167	0.924928	0.974247	0.802407	0.888575	0.925142	0.961854	0.881288	0.916851	0.744207	0.580145	0.826323	0.84522	0.891454	0.323389	0.869148	-0.762177	-0.602879	0.929661	0.765444	-0.785525	-0.834358	-0.36037	-0.709764	0.862078	0.865431	0.0131728	-0.87002	-0.755885	-0.806603
TraesCS3D03G0189000	-0.882453	-0.670529	0.621787	0.942784	0.912858	0.958084	0.953659	0.820459	0.535339	0.936687	0.935052	0.965171	0.87096	0.79503	0.79778	0.947928	0.806615	0.914053	0.958245	0.936402	0.911992	0.836203	0.961881	0.900192	0.878141	0.871711	0.786939	0.913719	0.905182	0.552253	0.959708	0.913844	0.91565	0.17757	0.959396	-0.884943	-0.777022	0.857866	0.536701	-0.862131	-0.865592	-0.669749	-0.690863	0.926208	0.934646	0.574132	-0.770946	-0.693886	-0.623738
TraesCS3D03G0584900	-0.910474	-0.56321	0.542108	0.944836	0.933352	0.97293	0.932043	0.815873	0.491694	0.954908	0.965058	0.974438	0.841803	0.732757	0.740582	0.940095	0.781404	0.92141	0.972319	0.961124	0.922709	0.829825	0.95602	0.92437	0.898042	0.877366	0.779887	0.898011	0.879719	0.420428	0.958444	0.853181	0.931366	0.296401	0.96521	-0.810294	-0.740912	0.842581	0.538526	-0.797217	-0.891765	-0.674315	-0.699752	0.95676	0.889086	0.570455	-0.814356	-0.799065	-0.716602
TraesCS3D03G0597600	-0.689361	-0.574475	0.251059	0.689737	0.66511	0.742091	0.828062	0.708853	0.330581	0.678355	0.689503	0.755412	0.758058	0.396961	0.548667	0.652702	0.560732	0.535209	0.691021	0.710793	0.743189	0.78138	0.739519	0.67481	0.71219	0.731933	0.568586	0.737575	0.552408	0.541041	0.737269	0.794784	0.687599	-0.127401	0.7598	-0.799263	-0.675738	0.756611	0.37542	-0.819387	-0.688863	-0.420597	-0.722513	0.696802	0.7934	0.228122	-0.591573	-0.527909	-0.484012
TraesCS4A03G0112900	0.00311626	-0.645904	0.493848	0.15627	0.0662676	0.000210238	0.175569	-0.0025838	0.27202	0.0286996	-0.0746084	0.0527228	0.108659	0.199784	0.181381	0.141747	0.200294	0.0379089	0.0433689	-0.0192486	-0.00531154	-0.0177795	0.0980252	-0.049745	-0.058074	-0.0465405	-0.0200056	0.0339604	0.136403	0.38633	0.0743571	0.376748	-0.00168761	-0.533336	0.0664028	-0.486137	-0.484682	0.124174	-0.090945	-0.453771	-0.069964	-0.418894	-0.247466	-0.0874207	0.301275	0.282266	0.078866	0.361632	0.353676
TraesCS4A03G0337400	-0.733333	-0.65433	0.49492	0.829724	0.799318	0.783279	0.859993	0.648754	0.529538	0.752878	0.738662	0.819884	0.736236	0.427383	0.631418	0.746795	0.724954	0.641054	0.766753	0.752188	0.738064	0.704684	0.81221	0.690976	0.698212	0.676032	0.538293	0.719388	0.62219	0.511296	0.7995	0.836879	0.704117	-0.0985215	0.801013	-0.854089	-0.790992	0.751744	0.325659	-0.86813	-0.730682	-0.645272	-0.826283	0.72418	0.833716	0.473574	-0.577168	-0.523494	-0.438491
TraesCS4B03G0621700	-0.620958	-0.600814	0.769251	0.808037	0.766101	0.666573	0.660908	0.401204	0.634431	0.699425	0.618839	0.708028	0.563634	0.544919	0.602537	0.797603	0.752848	0.726663	0.691289	0.644872	0.587642	0.463294	0.72551	0.580187	0.532688	0.473951	0.443223	0.583253	0.705912	0.394484	0.705871	0.794814	0.614801	-0.194783	0.699676	-0.864408	-0.855852	0.573354	0.188059	-0.844589	-0.670291	-0.843134	-0.64681	0.587539	0.773856	0.713315	-0.425758	-0.367354	-0.2067
TraesCS4B03G0840600	-0.76782	-0.769944	0.702928	0.866981	0.812704	0.84857	0.890826	0.728725	0.559183	0.832214	0.799265	0.865649	0.826919	0.800977	0.788978	0.893465	0.776381	0.827035	0.850697	0.816809	0.81148	0.758383	0.884468	0.781185	0.763533	0.770306	0.713471	0.845679	0.86803	0.672967	0.875091	0.943641	0.81218	-0.0606469	0.870199	-0.953769	-0.815013	0.800899	0.45957	-0.920686	-0.772178	-0.662994	-0.642058	0.789574	0.93524	0.55688	-0.63373	-0.478513	-0.412969
TraesCS5B03G0347000	-0.483913	-0.468065	0.552107	0.618073	0.611462	0.459406	0.500161	0.249707	0.491538	0.504477	0.422026	0.513969	0.405589	0.132579	0.342229	0.541147	0.560077	0.380923	0.480276	0.451183	0.402684	0.316195	0.524299	0.389018	0.367945	0.281791	0.250541	0.366454	0.404143	0.275385	0.504935	0.597555	0.401595	-0.151095	0.495083	-0.650464	-0.698818	0.451506	0.119816	-0.680812	-0.503328	-0.718248	-0.745065	0.393619	0.573183	0.478888	-0.284913	-0.281722	-0.15509
TraesCS5B03G0976500	-0.811279	-0.734236	0.748132	0.937029	0.901378	0.861987	0.890228	0.675877	0.628294	0.86976	0.826648	0.894659	0.785687	0.669377	0.747464	0.908113	0.833743	0.823002	0.880152	0.83966	0.800087	0.703663	0.904948	0.786055	0.756537	0.718908	0.659447	0.797127	0.833094	0.553289	0.892081	0.916882	0.80648	0.0309223	0.880644	-0.9243	-0.861951	0.791323	0.423004	-0.911112	-0.807774	-0.800142	-0.786415	0.805061	0.915503	0.651512	-0.642417	-0.551749	-0.455039
TraesCS5D03G0344400	-0.905771	-0.664021	0.684065	0.967453	0.954986	0.928261	0.908626	0.74359	0.542748	0.948975	0.913414	0.947038	0.809878	0.683103	0.697614	0.954881	0.801814	0.875704	0.954196	0.92678	0.874353	0.750822	0.940405	0.884134	0.845032	0.794442	0.73972	0.839542	0.881382	0.42474	0.937833	0.893161	0.895723	0.264874	0.939207	-0.86897	-0.84869	0.834594	0.519986	-0.862793	-0.898823	-0.842533	-0.81406	0.898478	0.91228	0.644977	-0.776959	-0.728298	-0.637893
TraesCS5D03G0399000	-0.691397	-0.837393	0.601309	0.672607	0.643919	0.675028	0.792319	0.696864	0.342606	0.692144	0.618646	0.692987	0.804541	0.589855	0.570259	0.726882	0.547825	0.493702	0.685677	0.667662	0.706836	0.713469	0.729114	0.668182	0.678143	0.680376	0.697775	0.744497	0.727142	0.772182	0.726425	0.900045	0.689959	0.00461025	0.722396	-0.881937	-0.736469	0.801333	0.588459	-0.886588	-0.668068	-0.569757	-0.752596	0.628358	0.869691	0.242363	-0.576204	-0.34542	-0.370899
TraesCS5D03G0785000	-0.750029	-0.786246	0.610708	0.856392	0.809591	0.803479	0.900861	0.701824	0.554486	0.782223	0.763801	0.840272	0.768478	0.572516	0.704288	0.78245	0.753429	0.695271	0.811452	0.775392	0.758444	0.708229	0.842303	0.721462	0.717438	0.706501	0.600193	0.752296	0.700639	0.581018	0.8296	0.867369	0.737721	-0.0116445	0.821283	-0.868729	-0.799515	0.781407	0.398273	-0.862559	-0.737051	-0.681948	-0.795597	0.74889	0.86379	0.531971	-0.617502	-0.486303	-0.442671
TraesCS5D03G0914000	-0.720607	-0.776745	0.780928	0.88564	0.833648	0.782378	0.843865	0.608085	0.657679	0.787354	0.741368	0.824202	0.724297	0.650214	0.747714	0.838152	0.820139	0.765096	0.806895	0.752169	0.714439	0.624474	0.843015	0.693346	0.664965	0.635224	0.579878	0.724637	0.770895	0.584544	0.824504	0.878778	0.717607	-0.062324	0.803791	-0.899941	-0.83455	0.725705	0.351518	-0.878437	-0.718119	-0.770119	-0.735653	0.715122	0.86734	0.661489	-0.547293	-0.419011	-0.334712
TraesCS5D03G1198800	-0.210235	-0.546207	0.640649	0.524812	0.441278	0.322997	0.438595	0.12085	0.689582	0.30084	0.264795	0.393291	0.283745	0.279388	0.553959	0.395872	0.638596	0.399348	0.330882	0.256375	0.219653	0.173944	0.427036	0.167142	0.153563	0.135963	0.0557384	0.263333	0.301731	0.457696	0.386747	0.511783	0.198242	-0.559282	0.342631	-0.614012	-0.559907	0.262635	-0.149492	-0.585117	-0.23041	-0.476942	-0.400448	0.217434	0.469472	0.583718	0.00374013	0.10183	0.219451
TraesCS5D03G1228200	-0.381179	-0.775292	0.575132	0.440084	0.354746	0.424883	0.531981	0.440578	0.281603	0.427117	0.342205	0.436059	0.542595	0.680753	0.483775	0.554227	0.391616	0.446405	0.437308	0.403802	0.449693	0.453404	0.47954	0.402831	0.39608	0.446144	0.465884	0.520308	0.603148	0.651939	0.472109	0.74368	0.45973	-0.364355	0.485812	-0.809921	-0.669854	0.512637	0.287902	-0.757853	-0.447606	-0.474225	-0.323312	0.351334	0.688534	0.304533	-0.32478	-0.0166392	-0.0206293
TraesCS6B03G0469400	-0.624716	-0.673902	0.683145	0.844489	0.781434	0.719854	0.78051	0.500381	0.688991	0.698613	0.671868	0.769678	0.616516	0.530989	0.709305	0.751491	0.812397	0.733207	0.72578	0.674872	0.628734	0.544329	0.774794	0.592575	0.569958	0.543751	0.423935	0.627755	0.638894	0.471867	0.750399	0.797485	0.620393	-0.245707	0.736321	-0.856659	-0.815781	0.618702	0.155377	-0.834837	-0.649	-0.728183	-0.674401	0.638049	0.785149	0.697716	-0.442385	-0.367358	-0.239575
TraesCS6B03G1137500	-0.88413	-0.687587	0.671372	0.893381	0.87004	0.921473	0.88973	0.804341	0.440865	0.935343	0.897621	0.916697	0.860467	0.870552	0.725917	0.97387	0.724947	0.903362	0.940347	0.920471	0.900574	0.806675	0.923037	0.908007	0.871191	0.859865	0.844851	0.905151	0.973268	0.535657	0.927951	0.925034	0.930837	0.25481	0.937432	-0.893024	-0.796814	0.852369	0.617208	-0.863394	-0.885007	-0.727506	-0.643867	0.897916	0.938992	0.547092	-0.799629	-0.68093	-0.625728
TraesCS7A03G0007400	-0.847093	-0.606446	0.204257	0.704916	0.726915	0.810725	0.893063	0.863462	0.172053	0.784465	0.783175	0.81072	0.876587	0.359806	0.461864	0.695772	0.480434	0.467813	0.77822	0.815659	0.857809	0.897091	0.792304	0.814627	0.856985	0.853785	0.752056	0.825894	0.619591	0.556568	0.804983	0.821889	0.80568	0.27195	0.829652	-0.748651	-0.642765	0.90489	0.668432	-0.801838	-0.795886	-0.445532	-0.907849	0.807232	0.835981	0.0619233	-0.783997	-0.715305	-0.743603
TraesCS7A03G0292200	-0.958422	-0.658057	0.581255	0.943396	0.946741	0.968287	0.960732	0.845945	0.451642	0.975338	0.944982	0.974497	0.919363	0.668652	0.688851	0.966822	0.75288	0.822532	0.967848	0.966548	0.950857	0.883	0.970765	0.94319	0.92923	0.894323	0.839257	0.93151	0.902939	0.548886	0.974469	0.956798	0.950504	0.269754	0.982971	-0.912525	-0.825349	0.930159	0.640499	-0.924092	-0.933131	-0.73167	-0.86626	0.944745	0.9741	0.463572	-0.830874	-0.779995	-0.71337
TraesCS7A03G1132800	-0.790727	-0.581602	0.629501	0.903706	0.894749	0.80614	0.808407	0.573668	0.584326	0.825939	0.779946	0.845221	0.68423	0.435612	0.594899	0.835604	0.777524	0.728949	0.820257	0.795473	0.736616	0.623954	0.837076	0.73007	0.701099	0.628367	0.545081	0.689601	0.700718	0.35394	0.825146	0.818576	0.740601	0.0595766	0.823885	-0.833994	-0.849306	0.721908	0.331173	-0.849643	-0.797345	-0.840701	-0.866639	0.754904	0.823821	0.631626	-0.610302	-0.616739	-0.482676
TraesCS7B03G1255800	-0.201581	-0.363696	-0.00552699	0.199218	0.14636	0.301356	0.427759	0.409523	0.107815	0.199239	0.239344	0.29753	0.43456	0.28588	0.363989	0.212141	0.203739	0.172337	0.227606	0.24806	0.336334	0.473771	0.306587	0.243637	0.30732	0.401441	0.276747	0.408659	0.211593	0.559836	0.302427	0.429498	0.264149	-0.395784	0.313232	-0.450687	-0.228605	0.372322	0.15494	-0.440153	-0.198589	0.119318	-0.165783	0.257553	0.407437	-0.104629	-0.173794	-0.0383879	-0.0696796
TraesCS7D03G0002800	-0.450685	-0.617053	0.668765	0.728392	0.653652	0.584352	0.679164	0.383933	0.743013	0.54156	0.536356	0.64231	0.518862	0.464168	0.736795	0.60327	0.790713	0.618089	0.580492	0.515483	0.479927	0.432985	0.66492	0.428743	0.418612	0.40939	0.295046	0.520042	0.510005	0.560203	0.630947	0.678196	0.451975	-0.372944	0.588695	-0.737996	-0.639113	0.488395	0.0505893	-0.709452	-0.441762	-0.519596	-0.528114	0.493808	0.658965	0.629134	-0.240356	-0.15979	-0.047447
TraesCS7D03G1225400	-0.169074	-0.540135	0.509156	0.406915	0.336401	0.231362	0.374371	0.0980259	0.527192	0.219056	0.164519	0.297702	0.253592	0.139723	0.390661	0.298774	0.482085	0.224863	0.234186	0.180156	0.168735	0.156391	0.328682	0.107755	0.111121	0.0952405	0.0261188	0.199781	0.201416	0.434961	0.294759	0.480827	0.138128	-0.569442	0.267639	-0.583344	-0.54469	0.251885	-0.123536	-0.575792	-0.200053	-0.437269	-0.446925	0.131485	0.428037	0.409696	0.0163282	0.135889	0.221013
Cold hardy
>0.70672	28	59	0	0	0	0	0	0	0	0	0	0	0	0	0	0	0	0	0	0	0	0	0	0	0	0	0	0	0	0	0	0	0	0	0	64	63	0	0	64	37	8	29	0	0	0	13	2	3
<-0.70672	0	0	0	23	15	29	50	24	0	28	19	33	42	4	2	41	0	1	26	27	36	32	38	25	25	28	23	39	38	7	38	64	33	0	41	0	0	49	4	0	0	0	0	20	64	0	0	0	0
Anti-hardy
>0.70672	0	0	4	24	23	24	27	18	1	22	22	26	24	8	13	25	18	19	23	23	24	20	27	20	20	19	17	23	19	1	26	30	21	0	26	0	0	25	1	0	0	0	0	22	29	1	0	0	0
<-0.70672	22	12	0	0	0	0	0	0	0	0	0	0	0	0	0	0	0	0	0	0	0	0	0	0	0	0	0	0	0	0	0	0	0	1	0	31	24	0	0	31	22	13	22	0	0	0	16	10	8
	50	71	4	47	38	53	77	42	1	50	41	59	66	12	15	66	18	20	49	50	60	52	65	45	45	47	40	62	57	8	64	94	54	1	67	95	87	74	5	95	59	21	51	42	93	1	29	12	11
[truncated: 117 more columns]

## Sheet: GO_Hardy
Gene Count:	51
Background Gene Count:	75477
Ontology:	E:\GOAnalyzer\Deployment\Data\gofiles\go-basic.obo
Annotation:	E:\GOAnalyzer\Deployment\data\gofiles\Gene-GO_association.wheat2022
Hierarchy:	All
Correction:	BH FDR p-value adjustment
Max Path Length From Leaf:	N/A
Min Path Length From Root:	3
GO ID	Description	P-Value	Corrected P-Value	Total Genes	Matched Gene Counts	Matched Genes
GO:0004869	cysteine-type endopeptidase inhibitor activity	4.9e-05	5.205e-05	103	3 (2.91%)	TraesCS1D03G0737600;TraesCS3D03G0413100;TraesCS1B03G0882400
GO:0016624	oxidoreductase activity, acting on the aldehyde or oxo group of donors, disulfide as acceptor	0.0002056	0.0002183	31	2 (6.45%)	TraesCS7D03G0446000;TraesCS7B03G0271100
GO:0016903	oxidoreductase activity, acting on the aldehyde or oxo group of donors	0.00029	0.0003079	188	3 (1.6%)	TraesCS7D03G0446000;TraesCS3B03G0987700;TraesCS7B03G0271100
GO:0004857	enzyme inhibitor activity	0.0002968	0.0003151	865	5 (0.58%)	TraesCS1D03G0737600;TraesCS2A03G1236100;TraesCS1D03G0686300;TraesCS3D03G0413100;TraesCS1B03G0882400
GO:0004364	glutathione transferase activity	0.0006976	0.0007404	57	2 (3.51%)	TraesCS7D03G0069600;TraesCS1D03G0221500
GO:0009414	response to water deprivation	0.0008663	0.0009191	274	3 (1.09%)	TraesCS1B03G0882400;TraesCS6D03G0772500;TraesCS4A03G0180900
GO:0030234	enzyme regulator activity	0.001195	0.001268	1179	5 (0.42%)	TraesCS1D03G0737600;TraesCS2A03G1236100;TraesCS1D03G0686300;TraesCS3D03G0413100;TraesCS1B03G0882400
GO:0009415	response to water	0.001212	0.001286	308	3 (0.97%)	TraesCS1B03G0882400;TraesCS6D03G0772500;TraesCS4A03G0180900
GO:0001101	response to acid chemical	0.001258	0.001334	312	3 (0.96%)	TraesCS1B03G0882400;TraesCS6D03G0772500;TraesCS4A03G0180900
GO:0006790	sulfur compound metabolic process	0.001837	0.001947	770	4 (0.52%)	TraesCS7D03G0069600;TraesCS4A03G1138500;TraesCS1D03G0221500;TraesCS7D03G0446000
GO:0010011	auxin binding	0.002026	0.002147	3	1 (33.33%)	TraesCS5A03G0248600
GO:0006749	glutathione metabolic process	0.00253	0.002681	399	3 (0.75%)	TraesCS7D03G0069600;TraesCS4A03G1138500;TraesCS1D03G0221500
GO:0071229	cellular response to acid chemical	0.0027	0.00286	4	1 (25%)	TraesCS1B03G0882400
GO:0071462	cellular response to water stimulus	0.0027	0.00286	4	1 (25%)	TraesCS1B03G0882400
GO:0042631	cellular response to water deprivation	0.0027	0.00286	4	1 (25%)	TraesCS1B03G0882400
GO:0030414	peptidase inhibitor activity	0.003309	0.003504	439	3 (0.68%)	TraesCS1D03G0737600;TraesCS3D03G0413100;TraesCS1B03G0882400
GO:0061135	endopeptidase regulator activity	0.003309	0.003504	439	3 (0.68%)	TraesCS1D03G0737600;TraesCS3D03G0413100;TraesCS1B03G0882400
GO:0004866	endopeptidase inhibitor activity	0.003309	0.003504	439	3 (0.68%)	TraesCS1D03G0737600;TraesCS3D03G0413100;TraesCS1B03G0882400
GO:0061134	peptidase regulator activity	0.003372	0.003571	442	3 (0.68%)	TraesCS1D03G0737600;TraesCS3D03G0413100;TraesCS1B03G0882400
GO:0006575	cellular modified amino acid metabolic process	0.003862	0.004089	464	3 (0.65%)	TraesCS7D03G0069600;TraesCS4A03G1138500;TraesCS1D03G0221500
GO:0004349	glutamate 5-kinase activity	0.004048	0.004284	6	1 (16.67%)	TraesCS3B03G0987700
GO:0004350	glutamate-5-semialdehyde dehydrogenase activity	0.004048	0.004284	6	1 (16.67%)	TraesCS3B03G0987700
GO:0106035	protein maturation by [4Fe-4S] cluster transfer	0.004048	0.004284	6	1 (16.67%)	TraesCS5A03G0968800
GO:0010035	response to inorganic substance	0.00527	0.005577	519	3 (0.58%)	TraesCS1B03G0882400;TraesCS6D03G0772500;TraesCS4A03G0180900
GO:0009409	response to cold	0.005383	0.005695	161	2 (1.24%)	TraesCS1B03G0882400;TraesCS6D03G0772500
GO:0015112	nitrate transmembrane transporter activity	0.005393	0.005704	8	1 (12.5%)	TraesCS7A03G1041100
GO:0009628	response to abiotic stimulus	0.006094	0.006445	1079	4 (0.37%)	TraesCS2B03G0514500;TraesCS1B03G0882400;TraesCS6D03G0772500;TraesCS4A03G0180900
GO:0008535	respiratory chain complex IV assembly	0.006737	0.007123	10	1 (10%)	TraesCS5D03G0169500
GO:0033617	mitochondrial cytochrome c oxidase assembly	0.006737	0.007123	10	1 (10%)	TraesCS5D03G0169500
GO:0055129	L-proline biosynthetic process	0.007408	0.007831	11	1 (9.09%)	TraesCS3B03G0987700
GO:0070417	cellular response to cold	0.009419	0.009954	14	1 (7.14%)	TraesCS1B03G0882400
GO:0016765	transferase activity, transferring alkyl or aryl (other than methyl) groups	0.01	0.01	252	2 (0.79%)	TraesCS7D03G0069600;TraesCS1D03G0221500
GO:0006560	proline metabolic process	0.01	0.01	21	1 (4.76%)	TraesCS3B03G0987700
GO:0006561	proline biosynthetic process	0.01	0.01	15	1 (6.67%)	TraesCS3B03G0987700
GO:0019202	amino acid kinase activity	0.01	0.02	22	1 (4.55%)	TraesCS3B03G0987700
GO:0097428	protein maturation by iron-sulfur cluster transfer	0.01	0.01	19	1 (5.26%)	TraesCS5A03G0968800
GO:0006086	acetyl-CoA biosynthetic process from pyruvate	0.01	0.01	20	1 (5%)	TraesCS7D03G0446000
GO:0004738	pyruvate dehydrogenase activity	0.01	0.01	20	1 (5%)	TraesCS7D03G0446000
GO:0004739	pyruvate dehydrogenase (acetyl-transferring) activity	0.01	0.01	20	1 (5%)	TraesCS7D03G0446000
GO:0016020	membrane	0.02	0.02	17900	19 (0.11%)	TraesCS2D03G0055600;TraesCS4D03G0736900;TraesCS1D03G0686300;TraesCS5A03G0864400;TraesCS2B03G0082600;TraesCS3B03G0014400;TraesCS3B03G0141200;TraesCS7B03G0073300;TraesCS2A03G0054400;TraesCS2D03G0234900;TraesCS2A03G0325900;TraesCS3D03G0047400;TraesCS1B03G0882400;TraesCS7A03G1041100;TraesCS1B03G0360800;TraesCS4A03G0180900;TraesCS7B03G0786000;TraesCS5B03G1309300;TraesCS7D03G0906100
GO:0009266	response to temperature stimulus	0.02	0.02	312	2 (0.64%)	TraesCS1B03G0882400;TraesCS6D03G0772500
GO:0034605	cellular response to heat	0.02	0.02	25	1 (4%)	TraesCS1B03G0882400
GO:1901700	response to oxygen-containing compound	0.02	0.02	819	3 (0.37%)	TraesCS1B03G0882400;TraesCS6D03G0772500;TraesCS4A03G0180900
GO:0009269	response to desiccation	0.02	0.02	24	1 (4.17%)	TraesCS4A03G0180900
GO:0008154	actin polymerization or depolymerization	0.02	0.02	34	1 (2.94%)	TraesCS5A03G1126300
GO:0051261	protein depolymerization	0.02	0.02	26	1 (3.85%)	TraesCS5A03G1126300
GO:0030042	actin filament depolymerization	0.02	0.02	26	1 (3.85%)	TraesCS5A03G1126300
GO:0033108	mitochondrial respiratory chain complex assembly	0.02	0.03	36	1 (2.78%)	TraesCS5D03G0169500
GO:0009631	cold acclimation	0.02	0.02	29	1 (3.45%)	TraesCS6D03G0772500
GO:0035384	thioester biosynthetic process	0.02	0.02	33	1 (3.03%)	TraesCS7D03G0446000
GO:0071616	acyl-CoA biosynthetic process	0.02	0.02	33	1 (3.03%)	TraesCS7D03G0446000
GO:0006085	acetyl-CoA biosynthetic process	0.02	0.02	26	1 (3.85%)	TraesCS7D03G0446000
GO:0042221	response to chemical	0.03	0.03	1733	4 (0.23%)	TraesCS5D03G0169500;TraesCS1B03G0882400;TraesCS6D03G0772500;TraesCS4A03G0180900
GO:0098588	bounding membrane of organelle	0.03	0.03	944	3 (0.32%)	TraesCS1B03G0882400;TraesCS7A03G1041100;TraesCS5B03G1309300
GO:0005774	vacuolar membrane	0.03	0.03	380	2 (0.53%)	TraesCS1B03G0882400;TraesCS7A03G1041100
GO:0019210	kinase inhibitor activity	0.03	0.03	39	1 (2.56%)	TraesCS1D03G0686300
GO:0016774	phosphotransferase activity, carboxyl group as acceptor	0.03	0.03	39	1 (2.56%)	TraesCS3B03G0987700
GO:0009705	plant-type vacuole membrane	0.03	0.03	47	1 (2.13%)	TraesCS7A03G1041100
GO:0006084	acetyl-CoA metabolic process	0.03	0.03	46	1 (2.17%)	TraesCS7D03G0446000
GO:0033866	nucleoside bisphosphate biosynthetic process	0.03	0.03	48	1 (2.08%)	TraesCS7D03G0446000
GO:0034030	ribonucleoside bisphosphate biosynthetic process	0.03	0.03	48	1 (2.08%)	TraesCS7D03G0446000
GO:0034033	purine nucleoside bisphosphate biosynthetic process	0.03	0.03	48	1 (2.08%)	TraesCS7D03G0446000
GO:0104004	cellular response to environmental stimulus	0.04	0.05	67	1 (1.49%)	TraesCS1B03G0882400
GO:0071214	cellular response to abiotic stimulus	0.04	0.05	67	1 (1.49%)	TraesCS1B03G0882400
GO:0004713	protein tyrosine kinase activity	0.04	0.05	68	1 (1.47%)	TraesCS2B03G0690600
GO:0009084	glutamine family amino acid biosynthetic process	0.04	0.04	63	1 (1.59%)	TraesCS3B03G0987700
GO:0042562	hormone binding	0.04	0.04	53	1 (1.89%)	TraesCS5A03G0248600
GO:0043624	cellular protein complex disassembly	0.04	0.05	68	1 (1.47%)	TraesCS5A03G1126300
GO:0035383	thioester metabolic process	0.04	0.04	64	1 (1.56%)	TraesCS7D03G0446000
GO:0006637	acyl-CoA metabolic process	0.04	0.04	64	1 (1.56%)	TraesCS7D03G0446000
GO:0000325	plant-type vacuole	0.05	0.05	69	1 (1.45%)	TraesCS7A03G1041100

## Sheet: GO_AntiHardy
Gene Count:	31
Background Gene Count:	75477
Ontology:	E:\GOAnalyzer\Deployment\Data\gofiles\go-basic.obo
Annotation:	E:\GOAnalyzer\Deployment\data\gofiles\Gene-GO_association.wheat2022
Hierarchy:	All
Correction:	BH FDR p-value adjustment
Max Path Length From Leaf:	N/A
Min Path Length From Root:	3
GO ID	Description	P-Value	Corrected P-Value	Total Genes	Matched Gene Counts	Matched Genes
GO:0006851	mitochondrial calcium ion transmembrane transport	0.002462	0.002553	6	1 (16.67%)	TraesCS2A03G0873900
GO:0008171	O-methyltransferase activity	0.00346	0.003587	212	2 (0.94%)	TraesCS2D03G0196100;TraesCS1B03G0956400
GO:0008299	isoprenoid biosynthetic process	0.004022	0.004168	229	2 (0.87%)	TraesCS2D03G1118600;TraesCS3D03G0597600
GO:0016765	transferase activity, transferring alkyl or aryl (other than methyl) groups	0.004844	0.005019	252	2 (0.79%)	TraesCS2D03G1118600;TraesCS3D03G0597600
GO:0006720	isoprenoid metabolic process	0.005185	0.005371	261	2 (0.77%)	TraesCS2D03G1118600;TraesCS3D03G0597600
GO:2000012	regulation of auxin polar transport	0.005327	0.005517	13	1 (7.69%)	TraesCS5D03G0785000
GO:0120227	acyl-CoA binding	0.005735	0.005939	14	1 (7.14%)	TraesCS4B03G0621700
GO:1901567	fatty acid derivative binding	0.005735	0.005939	14	1 (7.14%)	TraesCS4B03G0621700
GO:0000062	fatty-acyl-CoA binding	0.005735	0.005939	14	1 (7.14%)	TraesCS4B03G0621700
GO:0048640	negative regulation of developmental growth	0.00696	0.007206	17	1 (5.88%)	TraesCS5D03G0785000
GO:0046621	negative regulation of organ growth	0.00696	0.007206	17	1 (5.88%)	TraesCS5D03G0785000
GO:1901265	nucleoside phosphate binding	0.007727	0.007999	12348	11 (0.09%)	TraesCS5B03G0976500;TraesCS2D03G0868600;TraesCS6B03G0469400;TraesCS4B03G0621700;TraesCS2A03G0080500;TraesCS5D03G1198800;TraesCS5D03G1228200;TraesCS1D03G0390800;TraesCS3D03G0189000;TraesCS4A03G0337400;TraesCS7B03G1255800
GO:0000166	nucleotide binding	0.007727	0.007999	12348	11 (0.09%)	TraesCS5B03G0976500;TraesCS2D03G0868600;TraesCS6B03G0469400;TraesCS4B03G0621700;TraesCS2A03G0080500;TraesCS5D03G1198800;TraesCS5D03G1228200;TraesCS1D03G0390800;TraesCS3D03G0189000;TraesCS4A03G0337400;TraesCS7B03G1255800
GO:0032559	adenyl ribonucleotide binding	0.007896	0.008171	10612	10 (0.09%)	TraesCS5B03G0976500;TraesCS2D03G0868600;TraesCS4B03G0621700;TraesCS2A03G0080500;TraesCS5D03G1198800;TraesCS5D03G1228200;TraesCS1D03G0390800;TraesCS3D03G0189000;TraesCS4A03G0337400;TraesCS7B03G1255800
GO:0030554	adenyl nucleotide binding	0.007943	0.008218	10621	10 (0.09%)	TraesCS5B03G0976500;TraesCS2D03G0868600;TraesCS4B03G0621700;TraesCS2A03G0080500;TraesCS5D03G1198800;TraesCS5D03G1228200;TraesCS1D03G0390800;TraesCS3D03G0189000;TraesCS4A03G0337400;TraesCS7B03G1255800
GO:0045926	negative regulation of growth	0.008998	0.009308	22	1 (4.55%)	TraesCS5D03G0785000
GO:0036094	small molecule binding	0.01	0.01	12835	11 (0.09%)	TraesCS5B03G0976500;TraesCS2D03G0868600;TraesCS6B03G0469400;TraesCS4B03G0621700;TraesCS2A03G0080500;TraesCS5D03G1198800;TraesCS5D03G1228200;TraesCS1D03G0390800;TraesCS3D03G0189000;TraesCS4A03G0337400;TraesCS7B03G1255800
GO:0017076	purine nucleotide binding	0.01	0.01	11272	10 (0.09%)	TraesCS5B03G0976500;TraesCS2D03G0868600;TraesCS4B03G0621700;TraesCS2A03G0080500;TraesCS5D03G1198800;TraesCS5D03G1228200;TraesCS1D03G0390800;TraesCS3D03G0189000;TraesCS4A03G0337400;TraesCS7B03G1255800
GO:0097367	carbohydrate derivative binding	0.01	0.01	11514	10 (0.09%)	TraesCS5B03G0976500;TraesCS2D03G0868600;TraesCS4B03G0621700;TraesCS2A03G0080500;TraesCS5D03G1198800;TraesCS5D03G1228200;TraesCS1D03G0390800;TraesCS3D03G0189000;TraesCS4A03G0337400;TraesCS7B03G1255800
GO:0032553	ribonucleotide binding	0.01	0.01	11399	10 (0.09%)	TraesCS5B03G0976500;TraesCS2D03G0868600;TraesCS4B03G0621700;TraesCS2A03G0080500;TraesCS5D03G1198800;TraesCS5D03G1228200;TraesCS1D03G0390800;TraesCS3D03G0189000;TraesCS4A03G0337400;TraesCS7B03G1255800
GO:0032555	purine ribonucleotide binding	0.01	0.01	11259	10 (0.09%)	TraesCS5B03G0976500;TraesCS2D03G0868600;TraesCS4B03G0621700;TraesCS2A03G0080500;TraesCS5D03G1198800;TraesCS5D03G1228200;TraesCS1D03G0390800;TraesCS3D03G0189000;TraesCS4A03G0337400;TraesCS7B03G1255800
GO:0008272	sulfate transport	0.01	0.01	35	1 (2.86%)	TraesCS2D03G1134400
GO:0015116	sulfate transmembrane transporter activity	0.01	0.01	35	1 (2.86%)	TraesCS2D03G1134400
GO:0022853	active ion transmembrane transporter activity	0.01	0.01	444	2 (0.45%)	TraesCS2D03G1134400;TraesCS6B03G0469400
GO:0008271	secondary active sulfate transmembrane transporter activity	0.01	0.01	35	1 (2.86%)	TraesCS2D03G1134400
GO:0016459	myosin complex	0.01	0.01	35	1 (2.86%)	TraesCS5B03G0976500
GO:0046620	regulation of organ growth	0.01	0.01	30	1 (3.33%)	TraesCS5D03G0785000
GO:0004089	carbonate dehydratase activity	0.02	0.02	56	1 (1.79%)	TraesCS2A03G0735800
GO:0070588	calcium ion transmembrane transport	0.02	0.02	47	1 (2.13%)	TraesCS2A03G0873900
GO:0072348	sulfur compound transport	0.02	0.02	37	1 (2.7%)	TraesCS2D03G1134400
GO:1901682	sulfur compound transmembrane transporter activity	0.02	0.02	37	1 (2.7%)	TraesCS2D03G1134400
GO:0051241	negative regulation of multicellular organismal process	0.02	0.02	59	1 (1.69%)	TraesCS5D03G0785000
GO:0004674	protein serine/threonine kinase activity	0.03	0.03	1608	3 (0.19%)	TraesCS1D03G0390800;TraesCS4A03G0337400;TraesCS7B03G1255800
GO:0006811	ion transport	0.03	0.03	1564	3 (0.19%)	TraesCS2D03G1134400;TraesCS6B03G0469400;TraesCS2A03G0873900
GO:0006816	calcium ion transport	0.03	0.03	65	1 (1.54%)	TraesCS2A03G0873900
GO:1990542	mitochondrial transmembrane transport	0.03	0.03	77	1 (1.3%)	TraesCS2A03G0873900
GO:1901681	sulfur compound binding	0.03	0.03	74	1 (1.35%)	TraesCS4B03G0621700
GO:0051093	negative regulation of developmental process	0.03	0.03	64	1 (1.56%)	TraesCS5D03G0785000
GO:0030001	metal ion transport	0.04	0.04	729	2 (0.27%)	TraesCS6B03G0469400;TraesCS2A03G0873900
GO:0055085	transmembrane transport	0.04	0.04	3222	4 (0.12%)	TraesCS2D03G1134400;TraesCS5D03G0344400;TraesCS2A03G0873900;TraesCS7D03G1225400
GO:0017171	serine hydrolase activity	0.04	0.04	734	2 (0.27%)	TraesCS7A03G0292200;TraesCS3B03G0008000
GO:0008236	serine-type peptidase activity	0.04	0.04	734	2 (0.27%)	TraesCS7A03G0292200;TraesCS3B03G0008000
GO:0033218	amide binding	0.04	0.04	101	1 (0.99%)	TraesCS4B03G0621700
GO:0015629	actin cytoskeleton	0.04	0.04	106	1 (0.94%)	TraesCS5B03G0976500
GO:0048638	regulation of developmental growth	0.04	0.04	93	1 (1.08%)	TraesCS5D03G0785000
GO:0032879	regulation of localization	0.04	0.04	103	1 (0.97%)	TraesCS5D03G0785000
GO:0051049	regulation of transport	0.04	0.04	90	1 (1.11%)	TraesCS5D03G0785000

## Sheet: ColdHardy_nodes
nodeName	Alt_nodeName	Degree	InternalDegree	Association Strength
TraesCS1B03G0360800	LOC123039942	437	4		entire net	subnet
TraesCS1B03G0654800	SGPP	187	32	average degree	353.635	26
TraesCS1B03G0874000	LOC123137611	117	23	Strength	0.0274136	0.412698
TraesCS1B03G0882400	Oc2*	51	5
TraesCS1D03G0221500	LOC123165828	757	32
TraesCS1D03G0737600	Oc2*	94	20
TraesCS1D03G0944000	OsRab11C3	824	37
TraesCS2A03G0054400	TraesCS2A03G0054400	69	18
TraesCS2A03G0325900	LOC123187869	802	41
TraesCS2A03G1236100	LOC123186458	251	21
TraesCS2B03G0082600	TraesCS2B03G0082600	272	39
TraesCS2B03G0514500	SAT32	194	26
TraesCS2B03G0690600	OsRLCK223	453	28
TraesCS2B03G1308500	SAPK1	430	39
TraesCS2D03G0055600	TraesCS2D03G0055600	412	49
TraesCS2D03G0234900	UXS4	28	5
TraesCS2D03G0404700	SAT32	89	17
TraesCS2D03G0812700	OsHCT1	385	38
TraesCS2D03G0911500	LOC123054167	392	31
TraesCS3B03G0141200	LOC123068468	351	29
TraesCS3B03G0987700	P5CS2	830	40
TraesCS3D03G0047400	TraesCS3D03G0047400	518	34
TraesCS3D03G0413100	CYS6	179	6
TraesCS3D03G0949700	ONAC041	18	3
TraesCS4A03G0180900	LOC123085359	364	40
TraesCS4A03G0266600	CK1	148	24
TraesCS4A03G0679200	LOC123087053	220	31
TraesCS4A03G1138500	LOC123088395	72	19
TraesCS4B03G0915000	OsSub25	785	35
TraesCS4B03G1005300	LOC123094051	461	37
TraesCS4D03G0736900	LOC123098809	400	28
TraesCS5A03G0248600	ERABP1	8	2
TraesCS5A03G0434000	TraesCS5A03G0434000	718	45
TraesCS5A03G0564300	LOC123103809	29	6
TraesCS5A03G0864400	OsRCI2-11	760	46
TraesCS5A03G0968800	LOC123105195	189	4
TraesCS5A03G1126300	ADF8	819	43
TraesCS5B03G0149900	LOC123115694	788	36
TraesCS5B03G1309300	LOC123114315	124	24
TraesCS5B03G1309400	LOC123117751	801	45
TraesCS5B03G1367500	LOC123114478	18	1
TraesCS5D03G0169500	OsIAA3	829	37
TraesCS5D03G0230900	EMB2786	476	46
TraesCS5D03G0561000	LOC123124893	39	14
TraesCS5D03G1068400	LOC100038341	137	20
TraesCS6B03G0877600	LOC123137977	604	37
TraesCS6D03G0772500	DHN3	238	28
TraesCS7A03G0398900	LYP6	712	33
TraesCS7A03G0474100	TraesCS7A03G0474100	351	22
TraesCS7A03G0546400	LOC123150876	193	6
TraesCS7A03G0941200	LOC123148313	510	31
TraesCS7A03G1041100	NRT2.4	572	48
TraesCS7B03G0073300	OSENOD93B	344	31
TraesCS7B03G0271100	LOC123160228	35	7
TraesCS7B03G0786000	LOC123159659	481	16
TraesCS7B03G1059600	LOC123155480	12	2
TraesCS7D03G0069600	gstu3	178	29
TraesCS7D03G0286800	RAP2-9	14	4
TraesCS7D03G0383800	LYP6	578	30
TraesCS7D03G0446000	LOC123167622	507	35
TraesCS7D03G0906100	LOC123165469	473	48
PG(34:3)	PG(34:3)	98	21
PG(36:6)	PG(36:6)	54	10

## Sheet: ColdHardy_Edges
fromNode	toNode	weight
TraesCS1B03G0654800	PG(34:3)	0.292686
TraesCS2A03G0325900	PG(34:3)	0.292407
TraesCS2B03G0082600	PG(34:3)	0.315604
TraesCS2B03G0514500	PG(34:3)	0.29043
TraesCS2B03G1308500	PG(34:3)	0.297836
TraesCS2D03G0055600	PG(34:3)	0.318762
TraesCS2D03G0812700	PG(34:3)	0.301271
TraesCS3B03G0141200	PG(34:3)	0.30894
TraesCS3B03G0987700	PG(34:3)	0.291538
TraesCS4A03G0180900	PG(34:3)	0.30175
TraesCS4B03G1005300	PG(34:3)	0.305741
TraesCS5A03G0434000	PG(34:3)	0.299104
TraesCS5A03G0864400	PG(34:3)	0.306798
TraesCS5A03G1126300	PG(34:3)	0.294863
TraesCS5B03G1309300	PG(34:3)	0.297441
TraesCS5B03G1309400	PG(34:3)	0.301303
TraesCS5D03G0230900	PG(34:3)	0.311662
TraesCS7A03G0941200	PG(34:3)	0.296849
TraesCS7A03G1041100	PG(34:3)	0.318752
TraesCS7D03G0069600	PG(34:3)	0.299401
TraesCS7D03G0906100	PG(34:3)	0.312307
TraesCS1B03G0654800	PG(36:6)	0.289608
TraesCS2B03G0082600	PG(36:6)	0.31318
TraesCS2D03G0055600	PG(36:6)	0.311655
TraesCS3B03G0141200	PG(36:6)	0.304852
TraesCS4B03G1005300	PG(36:6)	0.296057
TraesCS5B03G1309300	PG(36:6)	0.301793
TraesCS5D03G0230900	PG(36:6)	0.29642
TraesCS7A03G1041100	PG(36:6)	0.301485
TraesCS7D03G0069600	PG(36:6)	0.296718
TraesCS7D03G0906100	PG(36:6)	0.294655
TraesCS1B03G0654800	TraesCS1D03G0737600	0.296887
TraesCS1B03G0882400	TraesCS1D03G0737600	0.294422
TraesCS1B03G0874000	TraesCS1D03G0944000	0.306634
TraesCS1D03G0221500	TraesCS1D03G0944000	0.359376
TraesCS1B03G0654800	TraesCS2A03G0054400	0.299774
TraesCS1D03G0737600	TraesCS2A03G0054400	0.291302
TraesCS1B03G0874000	TraesCS2A03G0325900	0.306365
TraesCS1D03G0221500	TraesCS2A03G0325900	0.352446
TraesCS1D03G0944000	TraesCS2A03G0325900	0.346566
TraesCS1D03G0221500	TraesCS2A03G1236100	0.305868
TraesCS1D03G0944000	TraesCS2A03G1236100	0.312706
TraesCS2A03G0325900	TraesCS2A03G1236100	0.330003
TraesCS1B03G0654800	TraesCS2B03G0082600	0.303479
TraesCS1B03G0874000	TraesCS2B03G0082600	0.295336
TraesCS1B03G0882400	TraesCS2B03G0082600	0.300948
TraesCS1D03G0737600	TraesCS2B03G0082600	0.309256
TraesCS1D03G0944000	TraesCS2B03G0082600	0.300634
TraesCS2A03G0325900	TraesCS2B03G0082600	0.317931
TraesCS2A03G1236100	TraesCS2B03G0082600	0.3069
TraesCS1B03G0654800	TraesCS2B03G0514500	0.294787
TraesCS2A03G0054400	TraesCS2B03G0514500	0.291092
TraesCS2B03G0082600	TraesCS2B03G0514500	0.294628
TraesCS1D03G0221500	TraesCS2B03G0690600	0.336172
TraesCS1D03G0944000	TraesCS2B03G0690600	0.352207
TraesCS2A03G0325900	TraesCS2B03G0690600	0.355712
TraesCS2A03G1236100	TraesCS2B03G0690600	0.289823
TraesCS2B03G0082600	TraesCS2B03G0690600	0.297455
TraesCS1B03G0654800	TraesCS2B03G1308500	0.307415
TraesCS1B03G0874000	TraesCS2B03G1308500	0.300093
TraesCS1D03G0221500	TraesCS2B03G1308500	0.294332
TraesCS1D03G0944000	TraesCS2B03G1308500	0.321884
TraesCS2A03G0054400	TraesCS2B03G1308500	0.292004
TraesCS2A03G0325900	TraesCS2B03G1308500	0.313958
TraesCS2B03G0514500	TraesCS2B03G1308500	0.31451
TraesCS1B03G0654800	TraesCS2D03G0055600	0.313329
TraesCS1B03G0874000	TraesCS2D03G0055600	0.305707
TraesCS1B03G0882400	TraesCS2D03G0055600	0.296695
TraesCS1D03G0221500	TraesCS2D03G0055600	0.296561
TraesCS1D03G0737600	TraesCS2D03G0055600	0.307776
TraesCS1D03G0944000	TraesCS2D03G0055600	0.310909
TraesCS2A03G0054400	TraesCS2D03G0055600	0.300838
TraesCS2A03G0325900	TraesCS2D03G0055600	0.320658
TraesCS2A03G1236100	TraesCS2D03G0055600	0.300354
TraesCS2B03G0082600	TraesCS2D03G0055600	0.307397
TraesCS2B03G0514500	TraesCS2D03G0055600	0.310554
TraesCS2B03G0690600	TraesCS2D03G0055600	0.310095
TraesCS2B03G1308500	TraesCS2D03G0055600	0.301292
TraesCS1D03G0737600	TraesCS2D03G0234900	0.293509
TraesCS2B03G0082600	TraesCS2D03G0234900	0.300131
TraesCS2D03G0055600	TraesCS2D03G0234900	0.293531
TraesCS1B03G0654800	TraesCS2D03G0404700	0.30538
TraesCS1D03G0737600	TraesCS2D03G0404700	0.289564
TraesCS2A03G0054400	TraesCS2D03G0404700	0.298247
TraesCS2B03G0082600	TraesCS2D03G0404700	0.304468
TraesCS2B03G0514500	TraesCS2D03G0404700	0.303485
TraesCS2B03G1308500	TraesCS2D03G0404700	0.293316
TraesCS2D03G0055600	TraesCS2D03G0404700	0.310661
TraesCS1B03G0654800	TraesCS2D03G0812700	0.309077
TraesCS1B03G0874000	TraesCS2D03G0812700	0.298124
TraesCS1D03G0944000	TraesCS2D03G0812700	0.310213
TraesCS2A03G0054400	TraesCS2D03G0812700	0.296848
TraesCS2A03G0325900	TraesCS2D03G0812700	0.305325
TraesCS2B03G0514500	TraesCS2D03G0812700	0.316028
TraesCS2B03G1308500	TraesCS2D03G0812700	0.311906
TraesCS2D03G0055600	TraesCS2D03G0812700	0.299715
TraesCS2D03G0404700	TraesCS2D03G0812700	0.299507
TraesCS1D03G0221500	TraesCS2D03G0911500	0.312775
TraesCS1D03G0944000	TraesCS2D03G0911500	0.336956
TraesCS2A03G0325900	TraesCS2D03G0911500	0.324972
TraesCS2B03G0514500	TraesCS2D03G0911500	0.292156
TraesCS2B03G0690600	TraesCS2D03G0911500	0.295029
TraesCS2B03G1308500	TraesCS2D03G0911500	0.325476
TraesCS2D03G0055600	TraesCS2D03G0911500	0.307059
TraesCS2D03G0812700	TraesCS2D03G0911500	0.315743
TraesCS1B03G0882400	TraesCS3B03G0141200	0.291166
TraesCS1D03G0221500	TraesCS3B03G0141200	0.301043
TraesCS1D03G0737600	TraesCS3B03G0141200	0.296256
TraesCS1D03G0944000	TraesCS3B03G0141200	0.311415
TraesCS2A03G0325900	TraesCS3B03G0141200	0.329339
TraesCS2A03G1236100	TraesCS3B03G0141200	0.316992
TraesCS2B03G0082600	TraesCS3B03G0141200	0.303292
TraesCS2B03G0690600	TraesCS3B03G0141200	0.307256
TraesCS2D03G0055600	TraesCS3B03G0141200	0.300366
TraesCS2D03G0234900	TraesCS3B03G0141200	0.294284
TraesCS1B03G0874000	TraesCS3B03G0987700	0.308296
TraesCS1D03G0221500	TraesCS3B03G0987700	0.360698
TraesCS1D03G0944000	TraesCS3B03G0987700	0.352969
TraesCS2A03G0325900	TraesCS3B03G0987700	0.347652
TraesCS2A03G1236100	TraesCS3B03G0987700	0.328475
TraesCS2B03G0082600	TraesCS3B03G0987700	0.315706
TraesCS2B03G0690600	TraesCS3B03G0987700	0.361639
TraesCS2B03G1308500	TraesCS3B03G0987700	0.317657
TraesCS2D03G0055600	TraesCS3B03G0987700	0.320894
TraesCS2D03G0812700	TraesCS3B03G0987700	0.308716
TraesCS2D03G0911500	TraesCS3B03G0987700	0.333471
TraesCS3B03G0141200	TraesCS3B03G0987700	0.328147
TraesCS1B03G0654800	TraesCS3D03G0047400	0.292416
TraesCS1B03G0874000	TraesCS3D03G0047400	0.294492
TraesCS1D03G0221500	TraesCS3D03G0047400	0.318232
TraesCS1D03G0944000	TraesCS3D03G0047400	0.342586
TraesCS2A03G0325900	TraesCS3D03G0047400	0.329027
TraesCS2B03G0514500	TraesCS3D03G0047400	0.298902
TraesCS2B03G0690600	TraesCS3D03G0047400	0.305483
TraesCS2B03G1308500	TraesCS3D03G0047400	0.326247
TraesCS2D03G0055600	TraesCS3D03G0047400	0.307023
TraesCS2D03G0812700	TraesCS3D03G0047400	0.316129
TraesCS2D03G0911500	TraesCS3D03G0047400	0.323057
TraesCS3B03G0987700	TraesCS3D03G0047400	0.3339
TraesCS1B03G0360800	TraesCS3D03G0413100	0.344359
TraesCS1B03G0654800	TraesCS3D03G0413100	0.289402
TraesCS1D03G0737600	TraesCS3D03G0413100	0.294567
TraesCS2D03G0404700	TraesCS3D03G0413100	0.289013
TraesCS1B03G0360800	TraesCS3D03G0949700	0.309885
TraesCS1B03G0654800	TraesCS4A03G0180900	0.307112
TraesCS1B03G0874000	TraesCS4A03G0180900	0.29718
TraesCS1D03G0221500	TraesCS4A03G0180900	0.297579
TraesCS1D03G0944000	TraesCS4A03G0180900	0.321241
TraesCS2A03G0054400	TraesCS4A03G0180900	0.291348
TraesCS2A03G0325900	TraesCS4A03G0180900	0.318975
TraesCS2B03G0082600	TraesCS4A03G0180900	0.291763
TraesCS2B03G0514500	TraesCS4A03G0180900	0.300955
TraesCS2B03G1308500	TraesCS4A03G0180900	0.305864
TraesCS2D03G0055600	TraesCS4A03G0180900	0.301855
TraesCS2D03G0812700	TraesCS4A03G0180900	0.301521
TraesCS2D03G0911500	TraesCS4A03G0180900	0.306227
TraesCS3B03G0987700	TraesCS4A03G0180900	0.31743
TraesCS3D03G0047400	TraesCS4A03G0180900	0.316345
TraesCS1B03G0654800	TraesCS4A03G0266600	0.296568
TraesCS1D03G0944000	TraesCS4A03G0266600	0.298424
TraesCS2B03G0514500	TraesCS4A03G0266600	0.292993
TraesCS2B03G1308500	TraesCS4A03G0266600	0.318554
TraesCS2D03G0812700	TraesCS4A03G0266600	0.309968
TraesCS2D03G0911500	TraesCS4A03G0266600	0.296141
TraesCS3D03G0047400	TraesCS4A03G0266600	0.321742
TraesCS4A03G0180900	TraesCS4A03G0266600	0.309064
TraesCS1B03G0654800	TraesCS4A03G0679200	0.293041
TraesCS1D03G0221500	TraesCS4A03G0679200	0.291425
TraesCS1D03G0944000	TraesCS4A03G0679200	0.320722
TraesCS2A03G0325900	TraesCS4A03G0679200	0.314027
TraesCS2B03G1308500	TraesCS4A03G0679200	0.311067
TraesCS2D03G0055600	TraesCS4A03G0679200	0.296935
TraesCS2D03G0812700	TraesCS4A03G0679200	0.303046
TraesCS2D03G0911500	TraesCS4A03G0679200	0.293067
TraesCS3B03G0987700	TraesCS4A03G0679200	0.311603
TraesCS3D03G0047400	TraesCS4A03G0679200	0.321247
TraesCS4A03G0180900	TraesCS4A03G0679200	0.31144
TraesCS4A03G0266600	TraesCS4A03G0679200	0.296266
TraesCS1B03G0654800	TraesCS4A03G1138500	0.29066
TraesCS2B03G0082600	TraesCS4A03G1138500	0.290774
TraesCS2B03G0514500	TraesCS4A03G1138500	0.293159
TraesCS2B03G1308500	TraesCS4A03G1138500	0.293312
TraesCS2D03G0055600	TraesCS4A03G1138500	0.304622
TraesCS2D03G0404700	TraesCS4A03G1138500	0.296386
TraesCS2D03G0812700	TraesCS4A03G1138500	0.297616
TraesCS3B03G0987700	TraesCS4A03G1138500	0.289588
TraesCS1B03G0874000	TraesCS4B03G0915000	0.295287
TraesCS1D03G0221500	TraesCS4B03G0915000	0.352266
TraesCS1D03G0944000	TraesCS4B03G0915000	0.356482
TraesCS2A03G0325900	TraesCS4B03G0915000	0.351003
TraesCS2A03G1236100	TraesCS4B03G0915000	0.313493
TraesCS2B03G0082600	TraesCS4B03G0915000	0.292846
TraesCS2B03G0690600	TraesCS4B03G0915000	0.342704
TraesCS2B03G1308500	TraesCS4B03G0915000	0.301618
TraesCS2D03G0055600	TraesCS4B03G0915000	0.300378
TraesCS2D03G0812700	TraesCS4B03G0915000	0.293408
TraesCS2D03G0911500	TraesCS4B03G0915000	0.317481
TraesCS3B03G0141200	TraesCS4B03G0915000	0.307639
TraesCS3B03G0987700	TraesCS4B03G0915000	0.3567
TraesCS3D03G0047400	TraesCS4B03G0915000	0.325755
TraesCS4A03G0180900	TraesCS4B03G0915000	0.307393
TraesCS4A03G0679200	TraesCS4B03G0915000	0.303893
TraesCS1B03G0654800	TraesCS4B03G1005300	0.292659
TraesCS1B03G0874000	TraesCS4B03G1005300	0.289995
TraesCS1B03G0882400	TraesCS4B03G1005300	0.291914
TraesCS1D03G0221500	TraesCS4B03G1005300	0.308815
TraesCS1D03G0737600	TraesCS4B03G1005300	0.294452
TraesCS1D03G0944000	TraesCS4B03G1005300	0.319904
TraesCS2A03G0325900	TraesCS4B03G1005300	0.331555
TraesCS2A03G1236100	TraesCS4B03G1005300	0.312234
TraesCS2B03G0082600	TraesCS4B03G1005300	0.311179
TraesCS2B03G0690600	TraesCS4B03G1005300	0.317686
TraesCS2D03G0055600	TraesCS4B03G1005300	0.308122
TraesCS2D03G0234900	TraesCS4B03G1005300	0.294824
TraesCS3B03G0141200	TraesCS4B03G1005300	0.315393
TraesCS3B03G0987700	TraesCS4B03G1005300	0.329372
TraesCS4A03G0180900	TraesCS4B03G1005300	0.29714
TraesCS4A03G0679200	TraesCS4B03G1005300	0.290236
TraesCS4B03G0915000	TraesCS4B03G1005300	0.316765
TraesCS1D03G0221500	TraesCS4D03G0736900	0.318379
TraesCS1D03G0944000	TraesCS4D03G0736900	0.332938
TraesCS2A03G0325900	TraesCS4D03G0736900	0.310678
TraesCS2B03G1308500	TraesCS4D03G0736900	0.322782
TraesCS2D03G0055600	TraesCS4D03G0736900	0.294329
TraesCS2D03G0812700	TraesCS4D03G0736900	0.318686
TraesCS2D03G0911500	TraesCS4D03G0736900	0.301265
TraesCS3B03G0987700	TraesCS4D03G0736900	0.319009
TraesCS3D03G0047400	TraesCS4D03G0736900	0.324517
TraesCS4A03G0180900	TraesCS4D03G0736900	0.311658
TraesCS4A03G0266600	TraesCS4D03G0736900	0.305597
TraesCS4A03G0679200	TraesCS4D03G0736900	0.299341
TraesCS4B03G0915000	TraesCS4D03G0736900	0.320743
TraesCS1B03G0654800	TraesCS5A03G0248600	0.289375
TraesCS1D03G0737600	TraesCS5A03G0248600	0.290775
TraesCS1B03G0654800	TraesCS5A03G0434000	0.298016
TraesCS1B03G0874000	TraesCS5A03G0434000	0.307766
TraesCS1D03G0221500	TraesCS5A03G0434000	0.33451
TraesCS1D03G0944000	TraesCS5A03G0434000	0.345709
TraesCS2A03G0054400	TraesCS5A03G0434000	0.293871
TraesCS2A03G0325900	TraesCS5A03G0434000	0.336658
TraesCS2A03G1236100	TraesCS5A03G0434000	0.291923
TraesCS2B03G0082600	TraesCS5A03G0434000	0.305808
TraesCS2B03G0514500	TraesCS5A03G0434000	0.300062
TraesCS2B03G0690600	TraesCS5A03G0434000	0.3299
TraesCS2B03G1308500	TraesCS5A03G0434000	0.329322
TraesCS2D03G0055600	TraesCS5A03G0434000	0.313715
TraesCS2D03G0812700	TraesCS5A03G0434000	0.319194
TraesCS2D03G0911500	TraesCS5A03G0434000	0.328187
TraesCS3B03G0141200	TraesCS5A03G0434000	0.305077
TraesCS3B03G0987700	TraesCS5A03G0434000	0.340322
TraesCS3D03G0047400	TraesCS5A03G0434000	0.335071
TraesCS4A03G0180900	TraesCS5A03G0434000	0.328711
TraesCS4A03G0266600	TraesCS5A03G0434000	0.318954
TraesCS4A03G0679200	TraesCS5A03G0434000	0.330818
TraesCS4A03G1138500	TraesCS5A03G0434000	0.292397
TraesCS4B03G0915000	TraesCS5A03G0434000	0.33629
TraesCS4B03G1005300	TraesCS5A03G0434000	0.308753
TraesCS4D03G0736900	TraesCS5A03G0434000	0.327903
TraesCS2A03G0325900	TraesCS5A03G0564300	0.296886
TraesCS2B03G0082600	TraesCS5A03G0564300	0.294955
TraesCS3B03G0141200	TraesCS5A03G0564300	0.300243
TraesCS4B03G1005300	TraesCS5A03G0564300	0.300929
TraesCS1B03G0654800	TraesCS5A03G0864400	0.300342
TraesCS1B03G0874000	TraesCS5A03G0864400	0.310962
TraesCS1D03G0221500	TraesCS5A03G0864400	0.340918
TraesCS1D03G0944000	TraesCS5A03G0864400	0.346044
TraesCS2A03G0054400	TraesCS5A03G0864400	0.296063
TraesCS2A03G0325900	TraesCS5A03G0864400	0.338001
TraesCS2A03G1236100	TraesCS5A03G0864400	0.296032
TraesCS2B03G0082600	TraesCS5A03G0864400	0.310364
TraesCS2B03G0514500	TraesCS5A03G0864400	0.309883
TraesCS2B03G0690600	TraesCS5A03G0864400	0.342072
TraesCS2B03G1308500	TraesCS5A03G0864400	0.33314
TraesCS2D03G0055600	TraesCS5A03G0864400	0.319416
TraesCS2D03G0812700	TraesCS5A03G0864400	0.323494
TraesCS2D03G0911500	TraesCS5A03G0864400	0.338228
TraesCS3B03G0141200	TraesCS5A03G0864400	0.310054
TraesCS3B03G0987700	TraesCS5A03G0864400	0.345312
TraesCS3D03G0047400	TraesCS5A03G0864400	0.337528
TraesCS4A03G0180900	TraesCS5A03G0864400	0.325586
TraesCS4A03G0266600	TraesCS5A03G0864400	0.31285
TraesCS4A03G0679200	TraesCS5A03G0864400	0.32431
TraesCS4A03G1138500	TraesCS5A03G0864400	0.302742
TraesCS4B03G0915000	TraesCS5A03G0864400	0.339778
TraesCS4B03G1005300	TraesCS5A03G0864400	0.310415
TraesCS4D03G0736900	TraesCS5A03G0864400	0.329788
TraesCS5A03G0434000	TraesCS5A03G0864400	0.333394
TraesCS1B03G0360800	TraesCS5A03G0968800	0.358436
TraesCS3D03G0413100	TraesCS5A03G0968800	0.319557
TraesCS3D03G0949700	TraesCS5A03G0968800	0.292418
TraesCS1B03G0874000	TraesCS5A03G1126300	0.312262
TraesCS1D03G0221500	TraesCS5A03G1126300	0.355642
TraesCS1D03G0944000	TraesCS5A03G1126300	0.354976
TraesCS2A03G0054400	TraesCS5A03G1126300	0.289364
TraesCS2A03G0325900	TraesCS5A03G1126300	0.343674
TraesCS2A03G1236100	TraesCS5A03G1126300	0.313964
TraesCS2B03G0082600	TraesCS5A03G1126300	0.313459
TraesCS2B03G0514500	TraesCS5A03G1126300	0.293611
TraesCS2B03G0690600	TraesCS5A03G1126300	0.35373
TraesCS2B03G1308500	TraesCS5A03G1126300	0.332203
TraesCS2D03G0055600	TraesCS5A03G1126300	0.322127
TraesCS2D03G0812700	TraesCS5A03G1126300	0.321225
TraesCS2D03G0911500	TraesCS5A03G1126300	0.341682
TraesCS3B03G0141200	TraesCS5A03G1126300	0.319383
TraesCS3B03G0987700	TraesCS5A03G1126300	0.348495
TraesCS3D03G0047400	TraesCS5A03G1126300	0.345313
TraesCS4A03G0180900	TraesCS5A03G1126300	0.330201
TraesCS4A03G0266600	TraesCS5A03G1126300	0.310212
TraesCS4A03G0679200	TraesCS5A03G1126300	0.329346
TraesCS4A03G1138500	TraesCS5A03G1126300	0.294009
TraesCS4B03G0915000	TraesCS5A03G1126300	0.354453
TraesCS4B03G1005300	TraesCS5A03G1126300	0.324054
TraesCS4D03G0736900	TraesCS5A03G1126300	0.330354
TraesCS5A03G0434000	TraesCS5A03G1126300	0.34541
TraesCS5A03G0864400	TraesCS5A03G1126300	0.346622
TraesCS1B03G0874000	TraesCS5B03G0149900	0.298966
TraesCS1D03G0221500	TraesCS5B03G0149900	0.35016
TraesCS1D03G0944000	TraesCS5B03G0149900	0.34493
TraesCS2A03G0325900	TraesCS5B03G0149900	0.34492
TraesCS2A03G1236100	TraesCS5B03G0149900	0.328631
TraesCS2B03G0082600	TraesCS5B03G0149900	0.309181
TraesCS2B03G0690600	TraesCS5B03G0149900	0.34899
TraesCS2B03G1308500	TraesCS5B03G0149900	0.302767
TraesCS2D03G0055600	TraesCS5B03G0149900	0.310949
TraesCS2D03G0812700	TraesCS5B03G0149900	0.294008
TraesCS2D03G0911500	TraesCS5B03G0149900	0.314165
TraesCS3B03G0141200	TraesCS5B03G0149900	0.323964
TraesCS3B03G0987700	TraesCS5B03G0149900	0.347234
TraesCS3D03G0047400	TraesCS5B03G0149900	0.321577
TraesCS4A03G0180900	TraesCS5B03G0149900	0.311793
TraesCS4A03G0679200	TraesCS5B03G0149900	0.307436
TraesCS4B03G0915000	TraesCS5B03G0149900	0.348956
TraesCS4B03G1005300	TraesCS5B03G0149900	0.328013
TraesCS4D03G0736900	TraesCS5B03G0149900	0.305277
TraesCS5A03G0434000	TraesCS5B03G0149900	0.332251
TraesCS5A03G0564300	TraesCS5B03G0149900	0.29538
TraesCS5A03G0864400	TraesCS5B03G0149900	0.333264
TraesCS5A03G1126300	TraesCS5B03G0149900	0.344807
TraesCS1B03G0654800	TraesCS5B03G1309300	0.289058
TraesCS1D03G0737600	TraesCS5B03G1309300	0.295739
TraesCS2A03G0325900	TraesCS5B03G1309300	0.294698
TraesCS2B03G0082600	TraesCS5B03G1309300	0.312435
TraesCS2B03G1308500	TraesCS5B03G1309300	0.291918
TraesCS2D03G0055600	TraesCS5B03G1309300	0.317183
TraesCS2D03G0404700	TraesCS5B03G1309300	0.300598
TraesCS2D03G0812700	TraesCS5B03G1309300	0.295584
TraesCS3B03G0141200	TraesCS5B03G1309300	0.304614
TraesCS3B03G0987700	TraesCS5B03G1309300	0.292667
TraesCS4A03G0180900	TraesCS5B03G1309300	0.293336
TraesCS4A03G1138500	TraesCS5B03G1309300	0.289061
TraesCS4B03G1005300	TraesCS5B03G1309300	0.305039
TraesCS5A03G0434000	TraesCS5B03G1309300	0.294922
TraesCS5A03G0864400	TraesCS5B03G1309300	0.303457
TraesCS5A03G1126300	TraesCS5B03G1309300	0.294162
TraesCS1B03G0654800	TraesCS5B03G1309400	0.292133
TraesCS1B03G0874000	TraesCS5B03G1309400	0.312607
TraesCS1D03G0221500	TraesCS5B03G1309400	0.350776
TraesCS1D03G0944000	TraesCS5B03G1309400	0.351427
TraesCS2A03G0054400	TraesCS5B03G1309400	0.293457
TraesCS2A03G0325900	TraesCS5B03G1309400	0.339695
TraesCS2A03G1236100	TraesCS5B03G1309400	0.305288
TraesCS2B03G0082600	TraesCS5B03G1309400	0.312523
TraesCS2B03G0514500	TraesCS5B03G1309400	0.305008
TraesCS2B03G0690600	TraesCS5B03G1309400	0.350094
TraesCS2B03G1308500	TraesCS5B03G1309400	0.336062
TraesCS2D03G0055600	TraesCS5B03G1309400	0.322649
TraesCS2D03G0812700	TraesCS5B03G1309400	0.326204
TraesCS2D03G0911500	TraesCS5B03G1309400	0.345119
TraesCS3B03G0141200	TraesCS5B03G1309400	0.315002
TraesCS3B03G0987700	TraesCS5B03G1309400	0.346816
TraesCS3D03G0047400	TraesCS5B03G1309400	0.344418
TraesCS4A03G0180900	TraesCS5B03G1309400	0.328013
TraesCS4A03G0266600	TraesCS5B03G1309400	0.31146
TraesCS4A03G0679200	TraesCS5B03G1309400	0.326203
TraesCS4A03G1138500	TraesCS5B03G1309400	0.302498
TraesCS4B03G0915000	TraesCS5B03G1309400	0.348101
TraesCS4B03G1005300	TraesCS5B03G1309400	0.31692
TraesCS4D03G0736900	TraesCS5B03G1309400	0.331615
TraesCS5A03G0434000	TraesCS5B03G1309400	0.341014
TraesCS5A03G0864400	TraesCS5B03G1309400	0.345524
TraesCS5A03G1126300	TraesCS5B03G1309400	0.345168
TraesCS5B03G0149900	TraesCS5B03G1309400	0.338419
TraesCS5B03G1309300	TraesCS5B03G1309400	0.299806
TraesCS1B03G0654800	TraesCS5B03G1367500	0.293498
TraesCS1B03G0874000	TraesCS5D03G0169500	0.306006
TraesCS1D03G0221500	TraesCS5D03G0169500	0.36054
TraesCS1D03G0944000	TraesCS5D03G0169500	0.353086
TraesCS2A03G0325900	TraesCS5D03G0169500	0.348335
TraesCS2A03G1236100	TraesCS5D03G0169500	0.322586
TraesCS2B03G0082600	TraesCS5D03G0169500	0.306219
TraesCS2B03G0690600	TraesCS5D03G0169500	0.355989
TraesCS2B03G1308500	TraesCS5D03G0169500	0.316499
TraesCS2D03G0055600	TraesCS5D03G0169500	0.313488
TraesCS2D03G0812700	TraesCS5D03G0169500	0.305778
TraesCS2D03G0911500	TraesCS5D03G0169500	0.331775
TraesCS3B03G0141200	TraesCS5D03G0169500	0.319364
TraesCS3B03G0987700	TraesCS5D03G0169500	0.353315
TraesCS3D03G0047400	TraesCS5D03G0169500	0.33735
TraesCS4A03G0180900	TraesCS5D03G0169500	0.319111
TraesCS4A03G0266600	TraesCS5D03G0169500	0.290001
TraesCS4A03G0679200	TraesCS5D03G0169500	0.316649
TraesCS4B03G0915000	TraesCS5D03G0169500	0.357844
TraesCS4B03G1005300	TraesCS5D03G0169500	0.326117
TraesCS4D03G0736900	TraesCS5D03G0169500	0.32485
TraesCS5A03G0434000	TraesCS5D03G0169500	0.343796
TraesCS5A03G0864400	TraesCS5D03G0169500	0.344391
TraesCS5A03G1126300	TraesCS5D03G0169500	0.35274
TraesCS5B03G0149900	TraesCS5D03G0169500	0.348494
TraesCS5B03G1309400	TraesCS5D03G0169500	0.348094
TraesCS1B03G0654800	TraesCS5D03G0230900	0.312889
TraesCS1B03G0874000	TraesCS5D03G0230900	0.309999
TraesCS1D03G0221500	TraesCS5D03G0230900	0.294081
TraesCS1D03G0737600	TraesCS5D03G0230900	0.291476
TraesCS1D03G0944000	TraesCS5D03G0230900	0.315772
TraesCS2A03G0054400	TraesCS5D03G0230900	0.299596
TraesCS2A03G0325900	TraesCS5D03G0230900	0.314037
TraesCS2B03G0082600	TraesCS5D03G0230900	0.294519
TraesCS2B03G0514500	TraesCS5D03G0230900	0.32118
TraesCS2B03G0690600	TraesCS5D03G0230900	0.299339
TraesCS2B03G1308500	TraesCS5D03G0230900	0.318522
TraesCS2D03G0055600	TraesCS5D03G0230900	0.302207
TraesCS2D03G0404700	TraesCS5D03G0230900	0.3069
TraesCS2D03G0812700	TraesCS5D03G0230900	0.313779
TraesCS2D03G0911500	TraesCS5D03G0230900	0.324832
TraesCS3B03G0987700	TraesCS5D03G0230900	0.318423
TraesCS3D03G0047400	TraesCS5D03G0230900	0.322868
TraesCS4A03G0180900	TraesCS5D03G0230900	0.307722
TraesCS4A03G0266600	TraesCS5D03G0230900	0.307951
TraesCS4A03G0679200	TraesCS5D03G0230900	0.307974
TraesCS4A03G1138500	TraesCS5D03G0230900	0.306089
TraesCS4B03G0915000	TraesCS5D03G0230900	0.298482
TraesCS4B03G1005300	TraesCS5D03G0230900	0.291849
TraesCS4D03G0736900	TraesCS5D03G0230900	0.318715
TraesCS5A03G0434000	TraesCS5D03G0230900	0.321312
TraesCS5A03G0864400	TraesCS5D03G0230900	0.328113
TraesCS5A03G1126300	TraesCS5D03G0230900	0.326845
TraesCS5B03G0149900	TraesCS5D03G0230900	0.302513
TraesCS5B03G1309300	TraesCS5D03G0230900	0.307212
TraesCS5B03G1309400	TraesCS5D03G0230900	0.331885
TraesCS5D03G0169500	TraesCS5D03G0230900	0.312987
TraesCS1B03G0654800	TraesCS5D03G0561000	0.302767
TraesCS2B03G0514500	TraesCS5D03G0561000	0.297225
TraesCS2B03G1308500	TraesCS5D03G0561000	0.299423
TraesCS2D03G0812700	TraesCS5D03G0561000	0.30182
TraesCS3D03G0047400	TraesCS5D03G0561000	0.290302
TraesCS4A03G0180900	TraesCS5D03G0561000	0.29124
TraesCS5A03G0434000	TraesCS5D03G0561000	0.290318
TraesCS5A03G0864400	TraesCS5D03G0561000	0.290095
TraesCS5D03G0230900	TraesCS5D03G0561000	0.298631
TraesCS1B03G0654800	TraesCS5D03G1068400	0.293849
TraesCS2A03G0054400	TraesCS5D03G1068400	0.290348
TraesCS2B03G0082600	TraesCS5D03G1068400	0.290435
TraesCS2B03G0514500	TraesCS5D03G1068400	0.29518
TraesCS2B03G1308500	TraesCS5D03G1068400	0.305665
TraesCS2D03G0055600	TraesCS5D03G1068400	0.305512
TraesCS2D03G0404700	TraesCS5D03G1068400	0.301689
TraesCS2D03G0812700	TraesCS5D03G1068400	0.310597
TraesCS4A03G0180900	TraesCS5D03G1068400	0.293298
TraesCS4A03G1138500	TraesCS5D03G1068400	0.289514
TraesCS5A03G0864400	TraesCS5D03G1068400	0.296602
TraesCS5B03G1309400	TraesCS5D03G1068400	0.290809
TraesCS5D03G0230900	TraesCS5D03G1068400	0.313708
TraesCS5D03G0561000	TraesCS5D03G1068400	0.296403
TraesCS1B03G0654800	TraesCS6B03G0877600	0.291964
TraesCS1B03G0874000	TraesCS6B03G0877600	0.299526
TraesCS1D03G0221500	TraesCS6B03G0877600	0.323217
TraesCS1D03G0944000	TraesCS6B03G0877600	0.343145
TraesCS2A03G0054400	TraesCS6B03G0877600	0.289163
TraesCS2A03G0325900	TraesCS6B03G0877600	0.326936
TraesCS2B03G0514500	TraesCS6B03G0877600	0.302602
TraesCS2B03G0690600	TraesCS6B03G0877600	0.312665
TraesCS2B03G1308500	TraesCS6B03G0877600	0.333351
TraesCS2D03G0055600	TraesCS6B03G0877600	0.306449
TraesCS2D03G0812700	TraesCS6B03G0877600	0.323401
TraesCS2D03G0911500	TraesCS6B03G0877600	0.331833
TraesCS3B03G0987700	TraesCS6B03G0877600	0.333665
TraesCS3D03G0047400	TraesCS6B03G0877600	0.335928
TraesCS4A03G0180900	TraesCS6B03G0877600	0.323294
TraesCS4A03G0266600	TraesCS6B03G0877600	0.327914
TraesCS4A03G0679200	TraesCS6B03G0877600	0.327395
TraesCS4A03G1138500	TraesCS6B03G0877600	0.289028
TraesCS4B03G0915000	TraesCS6B03G0877600	0.328465
TraesCS4D03G0736900	TraesCS6B03G0877600	0.335144
TraesCS5A03G0434000	TraesCS6B03G0877600	0.33317
TraesCS5A03G0864400	TraesCS6B03G0877600	0.337421
TraesCS5A03G1126300	TraesCS6B03G0877600	0.343353
TraesCS5B03G0149900	TraesCS6B03G0877600	0.320264
TraesCS5B03G1309400	TraesCS6B03G0877600	0.343139
TraesCS5D03G0169500	TraesCS6B03G0877600	0.337373
TraesCS5D03G0230900	TraesCS6B03G0877600	0.324118
TraesCS5D03G0561000	TraesCS6B03G0877600	0.295336
TraesCS5D03G1068400	TraesCS6B03G0877600	0.290469
TraesCS1B03G0654800	TraesCS6D03G0772500	0.298487
TraesCS1D03G0944000	TraesCS6D03G0772500	0.301347
TraesCS2A03G0325900	TraesCS6D03G0772500	0.289562
TraesCS2B03G0514500	TraesCS6D03G0772500	0.301778
TraesCS2B03G1308500	TraesCS6D03G0772500	0.321813
TraesCS2D03G0812700	TraesCS6D03G0772500	0.313892
TraesCS2D03G0911500	TraesCS6D03G0772500	0.305397
TraesCS3B03G0987700	TraesCS6D03G0772500	0.290978
TraesCS3D03G0047400	TraesCS6D03G0772500	0.324697
TraesCS4A03G0180900	TraesCS6D03G0772500	0.305772
TraesCS4A03G0266600	TraesCS6D03G0772500	0.305517
TraesCS4A03G0679200	TraesCS6D03G0772500	0.291741
TraesCS4D03G0736900	TraesCS6D03G0772500	0.30758
TraesCS5A03G0434000	TraesCS6D03G0772500	0.320496
TraesCS5A03G0864400	TraesCS6D03G0772500	0.319917
TraesCS5A03G1126300	TraesCS6D03G0772500	0.314481
TraesCS5B03G1309400	TraesCS6D03G0772500	0.319344
TraesCS5D03G0169500	TraesCS6D03G0772500	0.29293
TraesCS5D03G0230900	TraesCS6D03G0772500	0.313094
TraesCS5D03G1068400	TraesCS6D03G0772500	0.291547
TraesCS6B03G0877600	TraesCS6D03G0772500	0.331605
TraesCS1B03G0874000	TraesCS7A03G0398900	0.298722
TraesCS1D03G0221500	TraesCS7A03G0398900	0.342785
TraesCS1D03G0944000	TraesCS7A03G0398900	0.35079
TraesCS2A03G0325900	TraesCS7A03G0398900	0.330019
TraesCS2B03G0690600	TraesCS7A03G0398900	0.324731
TraesCS2B03G1308500	TraesCS7A03G0398900	0.32706
TraesCS2D03G0055600	TraesCS7A03G0398900	0.299248
TraesCS2D03G0812700	TraesCS7A03G0398900	0.317443
TraesCS2D03G0911500	TraesCS7A03G0398900	0.333124
TraesCS3B03G0987700	TraesCS7A03G0398900	0.340102
TraesCS3D03G0047400	TraesCS7A03G0398900	0.340208
TraesCS4A03G0180900	TraesCS7A03G0398900	0.320594
TraesCS4A03G0266600	TraesCS7A03G0398900	0.31501
TraesCS4A03G0679200	TraesCS7A03G0398900	0.323277
TraesCS4B03G0915000	TraesCS7A03G0398900	0.342048
TraesCS4B03G1005300	TraesCS7A03G0398900	0.294785
TraesCS4D03G0736900	TraesCS7A03G0398900	0.342296
TraesCS5A03G0434000	TraesCS7A03G0398900	0.338808
TraesCS5A03G0864400	TraesCS7A03G0398900	0.342533
TraesCS5A03G1126300	TraesCS7A03G0398900	0.345669
TraesCS5B03G0149900	TraesCS7A03G0398900	0.327399
TraesCS5B03G1309400	TraesCS7A03G0398900	0.346755
TraesCS5D03G0169500	TraesCS7A03G0398900	0.345811
TraesCS5D03G0230900	TraesCS7A03G0398900	0.316697
TraesCS6B03G0877600	TraesCS7A03G0398900	0.342657
TraesCS6D03G0772500	TraesCS7A03G0398900	0.317582
TraesCS1D03G0221500	TraesCS7A03G0474100	0.319824
TraesCS1D03G0944000	TraesCS7A03G0474100	0.317997
TraesCS2A03G0325900	TraesCS7A03G0474100	0.324376
TraesCS2A03G1236100	TraesCS7A03G0474100	0.297349
TraesCS2B03G0082600	TraesCS7A03G0474100	0.306302
TraesCS2B03G0690600	TraesCS7A03G0474100	0.30161
TraesCS2D03G0055600	TraesCS7A03G0474100	0.307916
TraesCS3B03G0141200	TraesCS7A03G0474100	0.312545
TraesCS3B03G0987700	TraesCS7A03G0474100	0.327531
TraesCS4B03G0915000	TraesCS7A03G0474100	0.320631
TraesCS4B03G1005300	TraesCS7A03G0474100	0.312155
TraesCS5A03G0434000	TraesCS7A03G0474100	0.306742
TraesCS5A03G0864400	TraesCS7A03G0474100	0.313641
TraesCS5A03G1126300	TraesCS7A03G0474100	0.319879
TraesCS5B03G0149900	TraesCS7A03G0474100	0.321182
TraesCS5B03G1309400	TraesCS7A03G0474100	0.317861
TraesCS5D03G0169500	TraesCS7A03G0474100	0.323447
TraesCS5D03G0230900	TraesCS7A03G0474100	0.290937
TraesCS7A03G0398900	TraesCS7A03G0474100	0.295777
TraesCS1B03G0360800	TraesCS7A03G0546400	0.359854
TraesCS1D03G0737600	TraesCS7A03G0546400	0.290416
TraesCS2D03G0404700	TraesCS7A03G0546400	0.292721
TraesCS3D03G0413100	TraesCS7A03G0546400	0.326978
TraesCS3D03G0949700	TraesCS7A03G0546400	0.292869
TraesCS5A03G0968800	TraesCS7A03G0546400	0.327119
TraesCS1D03G0221500	TraesCS7A03G0941200	0.314648
TraesCS1D03G0944000	TraesCS7A03G0941200	0.325409
TraesCS2A03G0325900	TraesCS7A03G0941200	0.335314
TraesCS2A03G1236100	TraesCS7A03G0941200	0.30972
TraesCS2B03G0082600	TraesCS7A03G0941200	0.30757
TraesCS2B03G0690600	TraesCS7A03G0941200	0.319775
TraesCS2D03G0055600	TraesCS7A03G0941200	0.30759
TraesCS3B03G0141200	TraesCS7A03G0941200	0.315037
TraesCS3B03G0987700	TraesCS7A03G0941200	0.333463
TraesCS4A03G0180900	TraesCS7A03G0941200	0.295632
TraesCS4A03G0679200	TraesCS7A03G0941200	0.289504
TraesCS4B03G0915000	TraesCS7A03G0941200	0.323132
TraesCS4B03G1005300	TraesCS7A03G0941200	0.313333
TraesCS5A03G0434000	TraesCS7A03G0941200	0.309173
TraesCS5A03G0564300	TraesCS7A03G0941200	0.302145
TraesCS5A03G0864400	TraesCS7A03G0941200	0.310575
TraesCS5A03G1126300	TraesCS7A03G0941200	0.32704
TraesCS5B03G0149900	TraesCS7A03G0941200	0.333213
TraesCS5B03G1309300	TraesCS7A03G0941200	0.296374
TraesCS5B03G1309400	TraesCS7A03G0941200	0.318155
TraesCS5D03G0169500	TraesCS7A03G0941200	0.331854
TraesCS5D03G0230900	TraesCS7A03G0941200	0.290477
TraesCS7A03G0398900	TraesCS7A03G0941200	0.297005
TraesCS7A03G0474100	TraesCS7A03G0941200	0.308472
TraesCS1B03G0654800	TraesCS7A03G1041100	0.318635
TraesCS1B03G0874000	TraesCS7A03G1041100	0.312754
TraesCS1D03G0221500	TraesCS7A03G1041100	0.306735
TraesCS1D03G0737600	TraesCS7A03G1041100	0.298852
TraesCS1D03G0944000	TraesCS7A03G1041100	0.324398
TraesCS2A03G0054400	TraesCS7A03G1041100	0.303451
TraesCS2A03G0325900	TraesCS7A03G1041100	0.324704
TraesCS2A03G1236100	TraesCS7A03G1041100	0.290752
TraesCS2B03G0082600	TraesCS7A03G1041100	0.303676
TraesCS2B03G0514500	TraesCS7A03G1041100	0.320809
TraesCS2B03G0690600	TraesCS7A03G1041100	0.312378
TraesCS2B03G1308500	TraesCS7A03G1041100	0.322925
TraesCS2D03G0055600	TraesCS7A03G1041100	0.30941
TraesCS2D03G0404700	TraesCS7A03G1041100	0.308475
TraesCS2D03G0812700	TraesCS7A03G1041100	0.316843
TraesCS2D03G0911500	TraesCS7A03G1041100	0.330728
TraesCS3B03G0141200	TraesCS7A03G1041100	0.294738
TraesCS3B03G0987700	TraesCS7A03G1041100	0.327013
TraesCS3D03G0047400	TraesCS7A03G1041100	0.331509
TraesCS4A03G0180900	TraesCS7A03G1041100	0.317348
TraesCS4A03G0266600	TraesCS7A03G1041100	0.314108
TraesCS4A03G0679200	TraesCS7A03G1041100	0.317642
TraesCS4A03G1138500	TraesCS7A03G1041100	0.306008
TraesCS4B03G0915000	TraesCS7A03G1041100	0.308702
TraesCS4B03G1005300	TraesCS7A03G1041100	0.306821
TraesCS4D03G0736900	TraesCS7A03G1041100	0.321736
TraesCS5A03G0434000	TraesCS7A03G1041100	0.328482
TraesCS5A03G0864400	TraesCS7A03G1041100	0.333336
TraesCS5A03G1126300	TraesCS7A03G1041100	0.334801
TraesCS5B03G0149900	TraesCS7A03G1041100	0.314517
TraesCS5B03G1309300	TraesCS7A03G1041100	0.313019
TraesCS5B03G1309400	TraesCS7A03G1041100	0.336359
TraesCS5D03G0169500	TraesCS7A03G1041100	0.323077
TraesCS5D03G0230900	TraesCS7A03G1041100	0.316556
TraesCS5D03G0561000	TraesCS7A03G1041100	0.299783
TraesCS5D03G1068400	TraesCS7A03G1041100	0.31236
TraesCS6B03G0877600	TraesCS7A03G1041100	0.331186
TraesCS6D03G0772500	TraesCS7A03G1041100	0.316019
TraesCS7A03G0398900	TraesCS7A03G1041100	0.322426
TraesCS7A03G0474100	TraesCS7A03G1041100	0.302227
TraesCS7A03G0941200	TraesCS7A03G1041100	0.30728
TraesCS1D03G0221500	TraesCS7B03G0073300	0.324709
TraesCS1D03G0944000	TraesCS7B03G0073300	0.342768
TraesCS2A03G0325900	TraesCS7B03G0073300	0.33112
TraesCS2B03G0082600	TraesCS7B03G0073300	0.291723
TraesCS2B03G1308500	TraesCS7B03G0073300	0.323755
TraesCS2D03G0055600	TraesCS7B03G0073300	0.311735
TraesCS2D03G0812700	TraesCS7B03G0073300	0.314744
TraesCS2D03G0911500	TraesCS7B03G0073300	0.310846
TraesCS3B03G0987700	TraesCS7B03G0073300	0.335267
TraesCS3D03G0047400	TraesCS7B03G0073300	0.33116
TraesCS4A03G0180900	TraesCS7B03G0073300	0.318405
TraesCS4A03G0266600	TraesCS7B03G0073300	0.29344
TraesCS4A03G0679200	TraesCS7B03G0073300	0.29633
TraesCS4B03G0915000	TraesCS7B03G0073300	0.33113
TraesCS4B03G1005300	TraesCS7B03G0073300	0.300699
TraesCS4D03G0736900	TraesCS7B03G0073300	0.297383
TraesCS5A03G0434000	TraesCS7B03G0073300	0.339916
TraesCS5A03G0864400	TraesCS7B03G0073300	0.343277
TraesCS5A03G1126300	TraesCS7B03G0073300	0.342068
TraesCS5B03G0149900	TraesCS7B03G0073300	0.325411
TraesCS5B03G1309400	TraesCS7B03G0073300	0.34153
TraesCS5D03G0169500	TraesCS7B03G0073300	0.339662
TraesCS5D03G0230900	TraesCS7B03G0073300	0.319961
TraesCS6B03G0877600	TraesCS7B03G0073300	0.334823
TraesCS6D03G0772500	TraesCS7B03G0073300	0.293938
TraesCS7A03G0398900	TraesCS7B03G0073300	0.331827
TraesCS7A03G0941200	TraesCS7B03G0073300	0.299605
TraesCS7A03G1041100	TraesCS7B03G0073300	0.33329
TraesCS1D03G0737600	TraesCS7B03G0271100	0.28905
TraesCS2A03G0325900	TraesCS7B03G0271100	0.291709
TraesCS2B03G0082600	TraesCS7B03G0271100	0.296935
TraesCS2D03G0055600	TraesCS7B03G0271100	0.290662
TraesCS3B03G0141200	TraesCS7B03G0271100	0.302683
TraesCS4B03G1005300	TraesCS7B03G0271100	0.307844
TraesCS7A03G0941200	TraesCS7B03G0271100	0.304444
TraesCS1D03G0221500	TraesCS7B03G0786000	0.325591
TraesCS1D03G0944000	TraesCS7B03G0786000	0.325011
TraesCS2A03G0325900	TraesCS7B03G0786000	0.332692
TraesCS2A03G1236100	TraesCS7B03G0786000	0.302825
TraesCS2B03G0690600	TraesCS7B03G0786000	0.295209
TraesCS3B03G0141200	TraesCS7B03G0786000	0.307791
TraesCS3B03G0987700	TraesCS7B03G0786000	0.332441
TraesCS4B03G0915000	TraesCS7B03G0786000	0.332633
TraesCS4B03G1005300	TraesCS7B03G0786000	0.311986
TraesCS5A03G0434000	TraesCS7B03G0786000	0.298746
TraesCS5A03G0864400	TraesCS7B03G0786000	0.300491
TraesCS5A03G1126300	TraesCS7B03G0786000	0.319344
TraesCS5B03G0149900	TraesCS7B03G0786000	0.337102
TraesCS5B03G1309400	TraesCS7B03G0786000	0.307133
TraesCS5D03G0169500	TraesCS7B03G0786000	0.334709
TraesCS7A03G0941200	TraesCS7B03G0786000	0.317371
TraesCS1D03G0737600	TraesCS7B03G1059600	0.291712
TraesCS2B03G0082600	TraesCS7B03G1059600	0.29277
TraesCS1B03G0654800	TraesCS7D03G0069600	0.296398
TraesCS1D03G0737600	TraesCS7D03G0069600	0.289523
TraesCS2A03G0054400	TraesCS7D03G0069600	0.289388
TraesCS2A03G0325900	TraesCS7D03G0069600	0.289918
TraesCS2B03G0082600	TraesCS7D03G0069600	0.296713
TraesCS2B03G0514500	TraesCS7D03G0069600	0.300668
TraesCS2B03G1308500	TraesCS7D03G0069600	0.305747
TraesCS2D03G0055600	TraesCS7D03G0069600	0.310857
TraesCS2D03G0404700	TraesCS7D03G0069600	0.30683
TraesCS2D03G0812700	TraesCS7D03G0069600	0.308759
TraesCS2D03G0911500	TraesCS7D03G0069600	0.29139
TraesCS3B03G0987700	TraesCS7D03G0069600	0.292459
TraesCS3D03G0047400	TraesCS7D03G0069600	0.293909
TraesCS4A03G0180900	TraesCS7D03G0069600	0.295566
TraesCS4A03G1138500	TraesCS7D03G0069600	0.294165
TraesCS5A03G0434000	TraesCS7D03G0069600	0.300749
TraesCS5A03G0864400	TraesCS7D03G0069600	0.311131
TraesCS5A03G1126300	TraesCS7D03G0069600	0.299404
TraesCS5B03G1309300	TraesCS7D03G0069600	0.292868
TraesCS5B03G1309400	TraesCS7D03G0069600	0.30928
TraesCS5D03G0230900	TraesCS7D03G0069600	0.316441
TraesCS5D03G1068400	TraesCS7D03G0069600	0.298286
TraesCS6B03G0877600	TraesCS7D03G0069600	0.299413
TraesCS6D03G0772500	TraesCS7D03G0069600	0.291386
TraesCS7A03G1041100	TraesCS7D03G0069600	0.316518
TraesCS1D03G0737600	TraesCS7D03G0286800	0.291781
TraesCS2B03G0082600	TraesCS7D03G0286800	0.29239
TraesCS2D03G0055600	TraesCS7D03G0286800	0.28953
TraesCS4B03G1005300	TraesCS7D03G0286800	0.292516
TraesCS1D03G0221500	TraesCS7D03G0383800	0.341142
TraesCS1D03G0944000	TraesCS7D03G0383800	0.35574
TraesCS2A03G0325900	TraesCS7D03G0383800	0.33828
TraesCS2B03G0690600	TraesCS7D03G0383800	0.309131
TraesCS2B03G1308500	TraesCS7D03G0383800	0.324765
TraesCS2D03G0055600	TraesCS7D03G0383800	0.298542
TraesCS2D03G0812700	TraesCS7D03G0383800	0.312617
TraesCS2D03G0911500	TraesCS7D03G0383800	0.328097
TraesCS3B03G0987700	TraesCS7D03G0383800	0.348484
TraesCS3D03G0047400	TraesCS7D03G0383800	0.340574
TraesCS4A03G0180900	TraesCS7D03G0383800	0.308785
TraesCS4A03G0266600	TraesCS7D03G0383800	0.30021
TraesCS4A03G0679200	TraesCS7D03G0383800	0.301982
TraesCS4B03G0915000	TraesCS7D03G0383800	0.343146
TraesCS4D03G0736900	TraesCS7D03G0383800	0.325499
TraesCS5A03G0434000	TraesCS7D03G0383800	0.347195
TraesCS5A03G0864400	TraesCS7D03G0383800	0.355304
TraesCS5A03G1126300	TraesCS7D03G0383800	0.358558
TraesCS5B03G0149900	TraesCS7D03G0383800	0.330288
TraesCS5B03G1309400	TraesCS7D03G0383800	0.360329
TraesCS5D03G0169500	TraesCS7D03G0383800	0.34985
TraesCS5D03G0230900	TraesCS7D03G0383800	0.31903
TraesCS6B03G0877600	TraesCS7D03G0383800	0.350014
TraesCS6D03G0772500	TraesCS7D03G0383800	0.305102
TraesCS7A03G0398900	TraesCS7D03G0383800	0.356262
TraesCS7A03G0941200	TraesCS7D03G0383800	0.290078
TraesCS7A03G1041100	TraesCS7D03G0383800	0.327275
TraesCS7B03G0073300	TraesCS7D03G0383800	0.323223
TraesCS1B03G0654800	TraesCS7D03G0446000	0.290236
TraesCS1B03G0874000	TraesCS7D03G0446000	0.293913
TraesCS1D03G0221500	TraesCS7D03G0446000	0.314439
TraesCS1D03G0944000	TraesCS7D03G0446000	0.339069
TraesCS2A03G0325900	TraesCS7D03G0446000	0.322867
TraesCS2B03G0514500	TraesCS7D03G0446000	0.301848
TraesCS2B03G0690600	TraesCS7D03G0446000	0.299299
TraesCS2B03G1308500	TraesCS7D03G0446000	0.32929
TraesCS2D03G0055600	TraesCS7D03G0446000	0.304518
TraesCS2D03G0812700	TraesCS7D03G0446000	0.319566
TraesCS2D03G0911500	TraesCS7D03G0446000	0.324312
TraesCS3B03G0987700	TraesCS7D03G0446000	0.329606
TraesCS3D03G0047400	TraesCS7D03G0446000	0.327041
TraesCS4A03G0180900	TraesCS7D03G0446000	0.314679
TraesCS4A03G0266600	TraesCS7D03G0446000	0.323634
TraesCS4A03G0679200	TraesCS7D03G0446000	0.319128
TraesCS4B03G0915000	TraesCS7D03G0446000	0.320638
TraesCS4D03G0736900	TraesCS7D03G0446000	0.328341
TraesCS5A03G0434000	TraesCS7D03G0446000	0.332429
TraesCS5A03G0864400	TraesCS7D03G0446000	0.336358
TraesCS5A03G1126300	TraesCS7D03G0446000	0.342055
TraesCS5B03G0149900	TraesCS7D03G0446000	0.314409
TraesCS5B03G1309400	TraesCS7D03G0446000	0.343695
TraesCS5D03G0169500	TraesCS7D03G0446000	0.332329
TraesCS5D03G0230900	TraesCS7D03G0446000	0.325603
TraesCS5D03G0561000	TraesCS7D03G0446000	0.292186
TraesCS5D03G1068400	TraesCS7D03G0446000	0.289787
TraesCS6B03G0877600	TraesCS7D03G0446000	0.337487
TraesCS6D03G0772500	TraesCS7D03G0446000	0.328713
TraesCS7A03G0398900	TraesCS7D03G0446000	0.341451
TraesCS7A03G1041100	TraesCS7D03G0446000	0.33111
TraesCS7B03G0073300	TraesCS7D03G0446000	0.327377
TraesCS7D03G0069600	TraesCS7D03G0446000	0.295901
TraesCS7D03G0383800	TraesCS7D03G0446000	0.341536
TraesCS1B03G0654800	TraesCS7D03G0906100	0.312985
TraesCS1B03G0874000	TraesCS7D03G0906100	0.303244
TraesCS1D03G0221500	TraesCS7D03G0906100	0.303398
TraesCS1D03G0737600	TraesCS7D03G0906100	0.297358
TraesCS1D03G0944000	TraesCS7D03G0906100	0.324897
TraesCS2A03G0054400	TraesCS7D03G0906100	0.298105
TraesCS2A03G0325900	TraesCS7D03G0906100	0.327906
TraesCS2A03G1236100	TraesCS7D03G0906100	0.292456
TraesCS2B03G0082600	TraesCS7D03G0906100	0.30303
TraesCS2B03G0514500	TraesCS7D03G0906100	0.307013
TraesCS2B03G0690600	TraesCS7D03G0906100	0.308656
TraesCS2B03G1308500	TraesCS7D03G0906100	0.308995
TraesCS2D03G0055600	TraesCS7D03G0906100	0.307635
TraesCS2D03G0404700	TraesCS7D03G0906100	0.298082
TraesCS2D03G0812700	TraesCS7D03G0906100	0.303053
TraesCS2D03G0911500	TraesCS7D03G0906100	0.314407
TraesCS3B03G0141200	TraesCS7D03G0906100	0.296792
TraesCS3B03G0987700	TraesCS7D03G0906100	0.326891
TraesCS3D03G0047400	TraesCS7D03G0906100	0.319617
TraesCS4A03G0180900	TraesCS7D03G0906100	0.310842
TraesCS4A03G0266600	TraesCS7D03G0906100	0.301378
TraesCS4A03G0679200	TraesCS7D03G0906100	0.309786
TraesCS4A03G1138500	TraesCS7D03G0906100	0.295134
TraesCS4B03G0915000	TraesCS7D03G0906100	0.312375
TraesCS4B03G1005300	TraesCS7D03G0906100	0.306027
TraesCS4D03G0736900	TraesCS7D03G0906100	0.306947
TraesCS5A03G0434000	TraesCS7D03G0906100	0.327252
TraesCS5A03G0864400	TraesCS7D03G0906100	0.328331
TraesCS5A03G1126300	TraesCS7D03G0906100	0.333921
TraesCS5B03G0149900	TraesCS7D03G0906100	0.320047
TraesCS5B03G1309300	TraesCS7D03G0906100	0.307277
TraesCS5B03G1309400	TraesCS7D03G0906100	0.331262
TraesCS5D03G0169500	TraesCS7D03G0906100	0.325372
TraesCS5D03G0230900	TraesCS7D03G0906100	0.307196
TraesCS5D03G0561000	TraesCS7D03G0906100	0.291403
TraesCS5D03G1068400	TraesCS7D03G0906100	0.299061
TraesCS6B03G0877600	TraesCS7D03G0906100	0.318266
TraesCS6D03G0772500	TraesCS7D03G0906100	0.302735
TraesCS7A03G0398900	TraesCS7D03G0906100	0.315147
TraesCS7A03G0474100	TraesCS7D03G0906100	0.299301
TraesCS7A03G0941200	TraesCS7D03G0906100	0.308103
TraesCS7A03G1041100	TraesCS7D03G0906100	0.318724
TraesCS7B03G0073300	TraesCS7D03G0906100	0.325992
TraesCS7D03G0069600	TraesCS7D03G0906100	0.304215
TraesCS7D03G0383800	TraesCS7D03G0906100	0.314333
TraesCS7D03G0446000	TraesCS7D03G0906100	0.316166

## Sheet: AntiHardy_nodes
nodeName	Alt_nodeName	Degree	Internal Degree	Association Strength
TraesCS2A03G0608600	AIR9	81	3		entire net	subnet
TraesCS2A03G0873900	LOC123189686	144	9	average degree	106.733	5.73333
TraesCS2D03G0196100	ZRP4	242	7	Strength	0.0082739	0.382222
TraesCS2D03G0868600	TraesCS2D03G0868600	21	2
TraesCS2D03G1118600	OsFPPS3	19	4
TraesCS2D03G1134400	SULTR3	89	9
TraesCS2D03G1170700	IIP5	123	9
TraesCS3B03G0008000	LOC123068164	14	4
TraesCS3D03G0189000	LOC123077295	31	4
TraesCS3D03G0584900	LOC123078819	75	4
TraesCS5D03G0344400	OsENA1	46	4
TraesCS6B03G1137500	BBD2	38	3
TraesCS7A03G0292200	TraesCS7A03G0292200	274	11
PG(34:4)	PG(34:4)	404	13

## Sheet: Anti_Hardy_Edges
fromNode	toNode	weight
TraesCS2A03G0608600	PG(34:4)	0.339346
TraesCS2A03G0873900	PG(34:4)	0.365815
TraesCS2D03G0196100	PG(34:4)	0.360188
TraesCS2D03G0868600	PG(34:4)	0.312441
TraesCS2D03G1118600	PG(34:4)	0.30957
TraesCS2D03G1134400	PG(34:4)	0.342302
TraesCS2D03G1170700	PG(34:4)	0.341287
TraesCS3B03G0008000	PG(34:4)	0.305082
TraesCS3D03G0189000	PG(34:4)	0.323505
TraesCS3D03G0584900	PG(34:4)	0.345752
TraesCS5D03G0344400	PG(34:4)	0.312429
TraesCS6B03G1137500	PG(34:4)	0.326895
TraesCS7A03G0292200	PG(34:4)	0.34981
TraesCS2A03G0873900	TraesCS2D03G0196100	0.299523
TraesCS2A03G0873900	TraesCS2D03G0868600	0.308922
TraesCS2A03G0873900	TraesCS2D03G1118600	0.302127
TraesCS2A03G0873900	TraesCS2D03G1134400	0.314401
TraesCS2D03G0196100	TraesCS2D03G1134400	0.291727
TraesCS2A03G0608600	TraesCS2D03G1170700	0.305308
TraesCS2A03G0873900	TraesCS2D03G1170700	0.31444
TraesCS2D03G0196100	TraesCS2D03G1170700	0.321794
TraesCS2D03G1118600	TraesCS2D03G1170700	0.321762
TraesCS2D03G1134400	TraesCS2D03G1170700	0.297269
TraesCS2D03G1134400	TraesCS3B03G0008000	0.292491
TraesCS2D03G1170700	TraesCS3B03G0008000	0.289304
TraesCS2A03G0873900	TraesCS3D03G0189000	0.301237
TraesCS2D03G1134400	TraesCS3D03G0189000	0.309675
TraesCS2A03G0873900	TraesCS3D03G0584900	0.311016
TraesCS2D03G0196100	TraesCS3D03G0584900	0.302068
TraesCS2D03G1134400	TraesCS3D03G0584900	0.296924
TraesCS2D03G0196100	TraesCS5D03G0344400	0.296477
TraesCS2D03G1170700	TraesCS5D03G0344400	0.314647
TraesCS2D03G1134400	TraesCS6B03G1137500	0.310531
TraesCS2A03G0608600	TraesCS7A03G0292200	0.323244
TraesCS2A03G0873900	TraesCS7A03G0292200	0.3142
TraesCS2D03G0196100	TraesCS7A03G0292200	0.33582
TraesCS2D03G1118600	TraesCS7A03G0292200	0.310525
TraesCS2D03G1134400	TraesCS7A03G0292200	0.314991
TraesCS2D03G1170700	TraesCS7A03G0292200	0.346148
TraesCS3B03G0008000	TraesCS7A03G0292200	0.298787
TraesCS3D03G0189000	TraesCS7A03G0292200	0.291444
TraesCS5D03G0344400	TraesCS7A03G0292200	0.326539
TraesCS6B03G1137500	TraesCS7A03G0292200	0.295514
