# Supplementary material for: Computational genomics insights into cold acclimation in wheat
Source: Front Genet. 2022 Oct 20;13:1015673. doi: 10.3389/fgene.2022.1015673 (PMC9632429; doi:10.3389/fgene.2022.1015673)
Supplement: Supplementary file 7 [file Table1.XLSX]

## Sheet: DEGs
Supplementary File S1 | the 12676 DEGs
Gene_ID	ID mapping to old versions											orthologies											Network analysis				Principal Component Analysis				Grouping				Gene Expression analysis
						NCBI annotations						Brachypodium distachyon			Oryza sativa				Arabidopsis thaliana				Cluster Membership		Degree		PC Score				WHG (1) or SHG (-1)	School A or B genes	Cold-hardy (1) or anti-hardy (-1)		TPM								log2FC
	old_id IWGSC RefSeq v1.2	old_id IWGSC RefSeq v1.0	old_id_TGACv1	old_id IWGSC-survey2.2	old_id 60K_Affy_array	NCBI GeneID	Symbol	NCBI_protein	Refseq Description	Synonyms		Bradi ID	Gene description		ORY ID	Gene name	Gene description		Tair10 ID	Gene name	Gene description		Mod	Color			PC1	PC2	PC3						M_Ctrl	M_Cold	WM_Ctrl	WM_Cold	N_Ctrl	N_Cold	SN_Ctrl	SN_Cold	log2FC_M	log2FC_WM	log2FC_N	log2FC_SN	log2FC_WM_vs_M_cold	log2FC_N_vs_SN_cold	log2FC_WM_vs_M_ctrl
TraesCS1A03G0000400	TraesCS1A02G000200	TraesCS1A01G000200																					28	skyblue			0.0042065	-0.00103974	-0.00269428						2.88	1.93333	7.82667	1.3	2.31333	2.85333	3.13333	1.9	-0.768856	-2.67426	0.905062	-1.51708	-0.40903	1.61283	1.49638
TraesCS1A03G0000600	TraesCS1A02G000300	TraesCS1A01G000300																					13	salmon			0.00589027	0.00224863	0.00321285						5.58	3.41667	18.7633	2.07	5.73333	7.91	12.9833	7.42	-0.712089	-2.57654	0.201271	-1.56803	0.129722	1.28277	1.99418
TraesCS1A03G0000800	TraesCS1A02G000400	TraesCS1A01G000400																					21	darkred			0.00529199	0.0025553	-0.00191199						16.8733	11.77	51.95	9.72	19.53	32.5333	29.09	16.6133	-0.785938	-2.78229	1.27163	-1.5094	-0.111729	1.92157	1.88463
TraesCS1A03G0001500	TraesCS1A02G000900	TraesCS1A01G000900																					27	white			0.00597143	0.000260805	-0.000564508						9.23333	5.46	32.02	3.71667	7.19	12.18	15.26	8.16667	-0.993651	-2.88389	1.24032	-1.39745	0.336537	1.13525	2.22678
TraesCS1A03G0001700	TraesCS1A02G001100	TraesCS1A01G001100																					28	skyblue			0.00409082	0.00131407	-0.00125551						2.90333	1.52667	7.83333	1.18667	2.61667	4.56667	3.41333	2.44667	-1.2766	-3.03372	1.31289	-1.27123	-0.175459	1.80774	1.58167
TraesCS1A03G0001800	TraesCS1A02G001000	TraesCS1A01G001000																					21	darkred			0.00491347	0.00322035	-0.000429438						2.72	1.42333	8.18667	1.18667	3.59	5.30333	4.71667	2.50667	-1.37732	-3.19709	1.05181	-1.41122	-0.778148	1.8035	1.04163
TraesCS1A03G0002200	TraesCS1A02G001400	TraesCS1A01G001400																					21	darkred			0.0055616	0.00282573	0.00071085						6.97333	4.57	20.0033	3.04333	8.33667	11.81	12.6267	6.74667	-0.849342	-2.80268	0.766988	-1.41772	-0.48691	1.376	1.46644
TraesCS1A03G0002400	TraesCS1A02G001300	TraesCS1A01G001300																					22	darkgreen			0.00553839	0.00639495	0.00750687						4.75	2.52	21.0633	3.57	10.9167	14.8567	17.3167	15.2133	-0.784163	-2.53616	1.22035	-1.10777	0.169329	0.566824	1.92134
TraesCS1A03G0003200	TraesCS1A02G001700	TraesCS1A01G001700																					21	darkred			0.00359411	0.00375159	-0.00608329						0.84	0.61	2.36667	0.47	1.56667	3.00333	0.836667	0	-0.84941	-3.00013	0.782355	-1.18004	-0.36144	0.945896	1.78929
TraesCS1A03G0004000	TraesCS1A02G001800	TraesCS1A01G001800			Ta.28123.1.S1_at	123183831	LOC123183831	XP_044452222.1	50S ribosomal protein L28, chloroplastic-like			BRADI_2g40040v3	PRPL28 [Source:Projected from Arabidopsis thaliana (AT2G33450) UniProtKB/TrEMBL;Acc:A0A178VYG9]		Os05g0101400		Similar to 50S ribosomal protein L28, chloroplast precursor		AT2G33450	RPL28	PRPL28 [Source:UniProtKB/TrEMBL;Acc:A0A178VYG9]		26	darkorange	14		0.006476	0.00152092	-0.00126203						68.8633	45.16	80.6567	28.5867	79.0833	59.2667	102.063	29.09	-0.786163	-1.70064	-0.337182	-2.38464	-0.767135	1.57129	0.147341
TraesCS1A03G0005200	TraesCS1A02G002500	TraesCS1A01G002500	TRIAE_CS42_1AS_TGACv1_020792_AA0079870	Traes_1AS_972AA6CB4	TaAffx.120929.1.S1_at	123183985	LOC123183985	XP_044452233.1	putative phospholipid-transporting ATPase 9			BRADI_2g40060v3	hypothetical protein		Os05g0100600		Similar to aminophospholipid ATPase						5	green	931		-0.00914769	-0.005648	0.00271325						5.31333	15.96	5.03667	16.85	4.01	6.35333	3.02667	19.8333	1.4232	1.45621	0.554029	2.24232	-0.131737	-1.30978	-0.164741
TraesCS1A03G0014600	TraesCS1A02G005000	TraesCS1A01G005000																					4	yellow	131		-0.00144367	0.0121893	0.0301024						0.0333333	0.586667	0	0.23	5.95	2.88667	5.59	16.1833	5.19062	4.37767	-1.11258	1.16361	-0.491449	-2.10594	0.32148
TraesCS1A03G0014800	TraesCS1A02G005100	TraesCS1A01G005100	TRIAE_CS42_1AS_TGACv1_019727_AA0070660	Traes_1AS_4C531B58D		123184249	LOC123184249	XP_044452355.1	vacuolar protein sorting-associated protein 60.1-like isoform X3														40	mediumpurple3			-0.00488511	-0.00767493	-0.00425081						3.00667	4.25	3.18667	13.2233	1.65333	1.28333	0.91	4.06333	0.331276	2.25418	-0.214449	2.33942	1.82741	-1.10784	-0.0954941
TraesCS1A03G0014900	TraesCS1A02G005200	TraesCS1A01G005200	TRIAE_CS42_1AS_TGACv1_019727_AA0070670	Traes_1AS_BDECE97A5		123184228	LOC123184228	XP_044452320.1	probable leucine-rich repeat receptor-like protein kinase At1g35710														2	blue	192		-0.00544871	0.00125513	0.0101425						0.0266667	0.633333	0	1.14	0.346667	0.37	0.433333	4.12333	4.97767	6.24308	0.347677	2.92025	0.267881	-2.8906	-0.997604
TraesCS1A03G0016500	TraesCS1A02G006000	TraesCS1A01G006000	TRIAE_CS42_1AS_TGACv1_019686_AA0069900	Traes_1AS_2E8E096B8																			40	mediumpurple3			-0.00937983	-0.00533712	-0.00463224						0.0966667	3.51333	0.0866667	8.31667	0.02	0.286667	0.0366667	1.88	4.63551	5.29621	1.91807	5.76485	0.0694073	-2.86764	-0.591302
TraesCS1A03G0017100	TraesCS1A02G006200	TraesCS1A01G006200	TRIAE_CS42_1AS_TGACv1_019798_AA0071500	Traes_1AS_5F591BB6F		123071392	LOC123071392	XP_044350872.1	MDIS1-interacting receptor like kinase 2-like														19	lightyellow	192		-0.0108299	-0.000677181	0.00312603						0.11	3.25667	0.0766667	5.28667	0.43	1.27667	0.216667	5.35667	4.63776	4.6928	1.42742	4.18425	0.448055	-1.69818	0.393014
TraesCS1A03G0017200	TraesCS1A02G006300	TraesCS1A01G006300	TRIAE_CS42_1AS_TGACv1_019798_AA0071520			123184432	LOC123184432	XP_044452488.1	probable leucine-rich repeat receptor-like protein kinase At1g35710														4	yellow	357		-0.00804046	0.00281289	0.0202659						0.0133333	0.233333	0.01	0.363333	0.06	0.71	0.106667	13.3333	4.90437	4.17911	2.41534	6.15824	-0.165374	-3.70234	0.559867
TraesCS1A03G0017500	TraesCS1A02G006500	TraesCS1A01G006500				123071412	LOC123071412	XP_044350894.1	MDIS1-interacting receptor like kinase 2-like														40	mediumpurple3	1		-0.00495927	-0.00600796	-0.00866606						0.283333	2.09	0.34	3.41667	0.00666667	0.0666667	0.0366667	0.293333	3.24484	3.19793	3.66725	5.09235	0.329046	-1.32345	0.375951
TraesCS1A03G0018400	TraesCS1A02G006800	TraesCS1A01G006800	TRIAE_CS42_1AS_TGACv1_020726_AA0079570	Traes_1AS_8D41E09B6		123184444	LOC123184444	XP_044452495.1	probable leucine-rich repeat receptor-like protein kinase At1g35710														4	yellow	388		-0.0095234	0.00231084	0.0230201						0.03	0.72	0.00666667	0.403333	0.146667	0.85	0.0966667	18.69	6.04971	4.65258	2.31862	6.43252	-0.272694	-4.03225	1.12443
TraesCS1A03G0018800	TraesCS1A02G007000	TraesCS1A01G007000	TRIAE_CS42_1AS_TGACv1_020726_AA0079530			123062545	LOC123062545	XP_044342068.1	probable leucine-rich repeat receptor-like protein kinase At1g35710			BRADI_3g21274v3	hypothetical protein										47	bisque4	70		-0.00741125	-0.00436383	-0.0010049						0.183333	2.31333	0.09	2.95667	0.05	0.216667	0	1.69	4.22477	5.6272	1.14912	5.4084	-0.619083	-3.17928	-2.02154
TraesCS1A03G0020900	TraesCS1A02G007800	TraesCS1A01G007800				123062835	LOC123062835	XP_044342476.1	uncharacterized protein LOC123062835						Os05g0103300		Similar to AT.I.24-5 protein (Fragment)						28	skyblue			-0.00374142	-0.0243082	-0.0298571						19.8	25.6467	60.49	21.72	0	2.98	2.47333	3.07667	0.380855	-1.12329	1.78173	-0.0194591	-0.169051	-0.405247	1.3351
TraesCS1A03G0023500	TraesCS1A02G008400	TraesCS1A01G008400	TRIAE_CS42_1AS_TGACv1_019647_AA0069510																				9	magenta			-0.00632418	0.0039321	0.00578254						0	1.05667	0.03	0.5	0.0566667	1.61	0.0733333	2.78	6.68987	2.96678	5.50887	6.03514	-0.923424	-0.278858	2.79965
TraesCS1A03G0031600	TraesCS1A02G012600	TraesCS1A01G012600	TRIAE_CS42_1AS_TGACv1_019540_AA0067810	Traes_1AS_54C4E52F5	TaAffx.51433.1.S1_x_at	123065001	LOC123065001	XP_044344343.1	polygalacturonase inhibitor-like			BRADI_2g39830v3	hypothetical protein		Os05g0104150	PGIP2	Leucine-rich repeat (LRR) protein, Inhibitor of fungal polygalacturonase, Defence respons						27	white			0.0146039	-0.0100521	0.00349802						8.73333	1.93	29.8367	1.18	8.38	0.213333	21.1667	2.07667	-2.00468	-5.35534	-5.33101	-4.30883	-1.7297	-2.5184	1.62096
TraesCS1A03G0033600	TraesCS1A02G013600	TraesCS1A01G013600	TRIAE_CS42_1AS_TGACv1_019763_AA0071120	Traes_1AS_8749E47E3		542796	LOC542796	XP_044344951.1	defensin Tk-AMP-D2	Tad1,PDF13,TaPDF13													1	turquoise	762		-0.00915085	0.0143899	-0.0122716						0	1.00667	0	3.25333	0	13.87	0	1.18333	4.72604	7.47429	9.72597	5.69804	1.75071	3.89691	-0.997587
TraesCS1A03G0037300	TraesCS1A02G015400	TraesCS1A01G015400	TRIAE_CS42_1AS_TGACv1_019551_AA0068080	Traes_1AS_737669F3E	Ta.6789.1.S1_x_at	123185380	LOC123185380	XP_044453203.1	ras-related protein RABA2a-like			BRADI_2g39770v3	hypothetical protein		Os05g0105100	OsRab11A2	Similar to Small GTPase rab11-related		AT1G09630	RABA2A	Ras-related protein RABA2a [Source:UniProtKB/Swiss-Prot;Acc:O04486]		14	cyan	28		-0.00887802	0.00546236	-0.0167778						2.21	3.75667	2.12	11.31	0.326667	13.8733	0.883333	2.65333	0.513922	2.10999	5.50403	1.31701	1.45559	3.19643	-0.140478
TraesCS1A03G0041900	TraesCS1A02G017900	TraesCS1A01G017900	TRIAE_CS42_1AS_TGACv1_019565_AA0068460	Traes_1AS_097B121E3	TaAffx.129414.3.S1_x_at	123185527	LOC123185527	XP_044453336.1	LEAF RUST 10 DISEASE-RESISTANCE LOCUS RECEPTOR-LIKE PROTEIN KINASE-like 2.3			BRADI_2g39720v3	hypothetical protein		Os01g0117600		Protein kinase, catalytic domain domain containing protein						6	red	246		-0.0132759	-0.0141038	0.0155883						24.2767	95.2033	8.3	30.6033	13.0667	10.95	3.15667	108.763	1.87711	1.72565	-0.419721	4.39222	-1.74928	-2.96228	-1.59782
TraesCS1A03G0042000	TraesCS1A02G018000	TraesCS1A01G018000	TRIAE_CS42_1AS_TGACv1_019565_AA0068470	Traes_1AS_AC54CBF83	TaAffx.42397.1.A1_at	123185539	LOC123185539	XP_044453344.1	rust resistance kinase Lr10-like isoform X1			BRADI_2g39710v3	hypothetical protein		Os01g0113500		Similar to Receptor-like kinase						10	purple	149		-0.0170347	-0.0195532	0.00203365						7.69333	50.98	4.32667	33.08	1.15667	2.14333	0.38	33.5033	2.57662	2.43937	0.871991	6.00668	-0.847272	-3.62774	-0.710024
TraesCS1A03G0042600	TraesCS1A02G018300	TraesCS1A01G018300	TRIAE_CS42_1AS_TGACv1_019636_AA0069160																				33	darkolivegreen			0.00589721	0.00154135	0.0029145						0.71	0.313333	1.05667	0.0933333	1.84	0.31	2.77333	0.246667	-1.38685	-3.7688	-3.0595	-3.06075	-2.36471	-0.485252	0.0172381
TraesCS1A03G0042900	TraesCS1A02G018500	TraesCS1A01G018500	TRIAE_CS42_1AS_TGACv1_019203_AA0063100	Traes_1AS_581D331E0	Ta.23359.1.A1_at	123185594	LOC123185594	XP_044453390.1	rust resistance kinase Lr10-like isoform X1														17	grey60			-0.00670379	-0.0195014	-0.00188204						10.8767	25.9	6.51667	9.98333	1.73	0.99	1.21	7.37333	1.1284	0.373395	-0.913495	2.24013	-1.51742	-2.51797	-0.762415
TraesCS1A03G0047100	TraesCS1A02G020900	TraesCS1A01G020900	TRIAE_CS42_1AS_TGACv1_019137_AA0061460		Ta.10192.1.A1_at	123162526	LOC123162526	XP_044436242.1	uncharacterized protein LOC123162526														3	brown	247		-0.00441199	-0.00511066	0.0168866						3.91333	11.2467	2.97333	2.75667	4.01333	2.28	2.5	14.7933	1.1783	0.765588	-1.09036	1.88756	-1.4598	-2.86169	-1.04709
TraesCS1A03G0047400	TraesCS1A02G021200	TraesCS1A01G021200	TRIAE_CS42_1AS_TGACv1_019137_AA0061430	Traes_1AS_87BBA62F4		123185785	LOC123185785	XP_044453547.1	mechanosensitive ion channel protein 5-like														11	greenyellow	667		-0.0138586	0.0152055	-0.0132534						0.0666667	3.52	0.106667	10.4667	0.356667	30.99	0.43	3.60667	5.20333	5.85199	6.65869	2.63174	1.33543	3.55827	0.686764
TraesCS1A03G0047800	TraesCS1A02G021400	TraesCS1A01G021400	TRIAE_CS42_1AS_TGACv1_019137_AA0061390	Traes_1AS_F098402B4		123069579	LOC123069579	XP_044348435.1	Bowman-Birk type trypsin inhibitor-like						Os03g0823400		Similar to Bowman-Birk type trypsin inhibitor (WTI)						41	lightsteelblue1			-0.00879651	-0.0110234	0.013161						6.00667	9.27	0.366667	1.39	0	1.13667	0	9.10667	1.13585	3.0544	5.27579	5.55497	-2.28816	-2.26578	-4.20673
TraesCS1A03G0056500	TraesCS1A02G024600	TraesCS1A01G024600	TRIAE_CS42_1AS_TGACv1_019182_AA0062370	Traes_1AS_655E0ECF6	Ta.25260.1.A1_at	123186037	LOC123186037	XP_044453770.1	protein DEHYDRATION-INDUCED 19 homolog 6-like isoform X1			BRADI_2g39370v3	hypothetical protein		Os05g0107900	OsDi19-6	Similar to Protein DEHYDRATION-INDUCED 19 homolog 6						14	cyan			-0.00407258	0.00582839	-0.0114778						1.02	2.43667	3.63667	9.09333	1.25667	7.54	3.04333	3.06333	1.31438	1.43334	2.39855	-0.769808	1.6052	1.94608	1.48624
TraesCS1A03G0057500	TraesCS1A02G025100	TraesCS1A01G025100	TRIAE_CS42_1AS_TGACv1_019182_AA0062400	Traes_1AS_79C89E16F	Ta.28469.2.S1_a_at	123186054	LOC123186054	XP_044453787.1	uncharacterized protein LOC123186054														27	white			0.0055933	-0.000475837	-0.000841337						5.09	1.42333	10.51	2.40333	3.9	3.05	7.16667	3.22333	-2.22932	-2.4353	0.04114	-1.92154	0.68181	0.742374	0.887795
TraesCS1A03G0059400	TraesCS1A02G025600	TraesCS1A01G025600	TRIAE_CS42_1AS_TGACv1_020088_AA0074610	Traes_1AS_8BAC45B9A1	TaAffx.105305.1.S1_at	123186119	LOC123186119	XP_044453847.1	disease resistance protein RPM1-like isoform X1	RPM1		BRADI_5g03110v3	hypothetical protein										6	red	184		-0.0089583	-0.010675	0.00268213						6.10333	12.7767	4.75667	9.41	2.24667	3.22	0.723333	13.6433	0.863388	0.607538	0.522144	3.63533	-0.766871	-1.63881	-0.511022
TraesCS1A03G0060600	TraesCS1A02G026200	TraesCS1A01G026200	TRIAE_CS42_U_TGACv1_640803_AA2074790	Traes_1AS_AAB89883E		123186316	LOC123186316	XP_044454041.1	disease resistance protein RPM1-like isoform X2														5	green			-0.0118319	-0.0212388	-0.00344317						23.3867	47.6933	19.13	29.5	3.2	6.06	0.503333	26.9133	0.916681	0.382461	0.707556	5.19924	-0.848912	-1.79796	-0.314694
TraesCS1A03G0061000	TraesCS1A02G026400	TraesCS1A01G026400	TRIAE_CS42_1AS_TGACv1_020217_AA0075770	Traes_1AS_13532D7C4		123186332	LOC123186332	XP_044454049.1	disease resistance protein RGA5-like isoform X1														40	mediumpurple3			-0.00618839	-0.0123521	-0.00526834						4.39	5.82333	4.76667	9.59667	0.966667	1.12333	0.623333	5.04667	0.250711	0.690259	0.181159	2.23022	0.41704	-1.62475	-0.0225077
TraesCS1A03G0065500	TraesCS1A02G028600	TraesCS1A01G028600																					4	yellow	254		-0.00232303	0.00052296	0.00884877						0.32	0.303333	0.353333	0.403333	0.416667	0.406667	0.446667	2.54667	0.00421989	0.254116	0.0826877	2.15218	0.400499	-2.14926	0.150604
TraesCS1A03G0066600	TraesCS1A02G029300	TraesCS1A01G029300	TRIAE_CS42_1AS_TGACv1_019176_AA0062190	Traes_1AS_10120B2AE	Ta.6973.1.A1_at	123186632	LOC123186632	XP_044454298.1	CSC1-like protein At3g21620			BRADI_2g39230v3	hypothetical protein		Os05g0594700	OsOSCA1.2	Similar to Hv711N16.16 (Fragment)		AT3G21620		CSC1-like protein At3g21620 [Source:UniProtKB/Swiss-Prot;Acc:Q9LVE4]		39	orangered4	39		-0.0125655	0.00284302	-0.00511832						3.26333	25.8433	7.23667	47.55	8.16333	23.38	3.19333	25.35	2.76193	2.62102	1.53588	2.50122	0.881989	0.342237	1.0229
TraesCS1A03G0068100	TraesCS1A02G030000	TraesCS1A01G030000	TRIAE_CS42_1AS_TGACv1_020737_AA0079650	Traes_1AS_10A0B5BBF	Ta.2825.3.S1_x_at	123186667	LOC123186667	XP_044454322.1	uncharacterized protein LOC123186667			BRADI_2g39200v3	hypothetical protein		Os05g0110100		Heat shock protein DnaJ, cysteine-rich domain domain containing protein		AT5G02160		AT5g02160 [Source:UniProtKB/TrEMBL;Acc:Q9FPH2]		13	salmon			0.010222	0.00168376	-0.0100332						242.16	96.0267	432.917	126.637	290.323	200.807	443.553	47.9267	-1.46922	-2.00871	-0.633566	-3.67445	0.246539	2.46408	0.786021
TraesCS1A03G0068200	TraesCS1A02G030100	TraesCS1A01G030100	TRIAE_CS42_1AS_TGACv1_019933_AA0073040	Traes_1AS_4C5CB51F2		123186688	LOC123186688	XP_044454342.1	uncharacterized protein At5g02240-like			BRADI_2g39190v3	hypothetical protein		Os05g0110300		Similar to NAD-dependent epimerase/dehydratase		AT2G37660		Uncharacterized protein At2g37660, chloroplastic [Source:UniProtKB/Swiss-Prot;Acc:O80934]		24	darkgrey			0.000754401	-0.00410013	-0.0112441						5.32333	4.96333	7.25	5.96667	2.62333	4.19333	3.58667	1.65	-0.264421	-0.649118	0.632756	-1.78033	-0.0725929	2.03949	0.312104
TraesCS1A03G0068800	TraesCS1A02G030400	TraesCS1A01G030400	TRIAE_CS42_1AS_TGACv1_019302_AA0064580	Traes_1AS_707A1B179		123186750	LOC123186750	XP_044454395.1	probable jasmonic acid carboxyl methyltransferase 2														42	lightcyan1			0.0116739	-0.0221732	-0.0121013						32.9533	4.54333	33.8933	2.81333	4.99333	0.21	3.91	0.193333	-2.97864	-4.00065	-5.06138	-5.86042	-0.971221	1.3009	0.0507905
TraesCS1A03G0070900	TraesCS1A02G031300	TraesCS1A01G031300	TRIAE_CS42_1AS_TGACv1_020508_AA0077910	Traes_1AS_D9B051FA5	TaAffx.81668.1.S1_at	123186895	LOC123186895	XP_044454522.1	protein NRT1/ PTR FAMILY 6.2-like			BRADI_2g41060v3	Protein NRT1/ PTR FAMILY 6.2 [Source:Projected from Arabidopsis thaliana (AT2G26690) UniProtKB/Swiss-Prot;Acc:Q9SZY4]						AT2G26690	NPF6.2	Protein NRT1/ PTR FAMILY 6.2 [Source:UniProtKB/Swiss-Prot;Acc:Q9SZY4]		28	skyblue			0.00373194	-0.00933125	-0.00727519						2.73	2.04333	6.3	2.57333	1.17333	0.186667	2.77667	0.656667	-0.0199803	-1.08643	-2.49411	-2.63139	0.149065	-1.07351	1.21551
TraesCS1A03G0074000	TraesCS1A02G033200	TraesCS1A01G033200	TRIAE_CS42_1AS_TGACv1_019706_AA0070290	Traes_1AS_ECE644985		123187034	LOC123187034	XP_044454724.1	xylan glycosyltransferase MUCI21-like			BRADI_2g13600v3	hypothetical protein		Os01g0498300		Glycosyltransferase AER61, uncharacterized domain containing protein		AT2G41640		At2g41640/T32G6.16 [Source:UniProtKB/TrEMBL;Acc:O22225]		23	darkturquoise			-0.00721565	-0.0077541	-0.00212363						29.62	21.0733	36.23	22.3567	8.58333	23.89	2.17667	39.9433	-0.627505	-0.950178	1.56479	3.54417	-0.0795868	-0.219629	0.243086
TraesCS1A03G0076000	TraesCS1A02G033500	TraesCS1A01G033500	TRIAE_CS42_1AS_TGACv1_019220_AA0063360	Traes_1AS_A4B0D42DF	Ta.3189.1.S1_x_at	123187058	LOC123187058	XP_044454757.1	outer envelope pore protein 16, chloroplastic-like										AT2G28900	OEP161	Outer envelope pore protein 16-1, chloroplastic [Source:UniProtKB/Swiss-Prot;Acc:Q9ZV24]		11	greenyellow	495		-0.00911016	0.0178445	-0.0218319						73.2	150.393	46.0033	575.47	122.15	1756.83	54.01	67.7667	0.928613	3.3653	3.95654	-0.270647	1.71098	5.47926	-0.725707
TraesCS1A03G0076400	TraesCS1A02G033600	TraesCS1A01G033600	TRIAE_CS42_1AS_TGACv1_019220_AA0063350	Traes_1AS_FF874F72D	Ta.7625.1.S1_x_at	123187066	LOC123187066	XP_044454767.1	outer envelope pore protein 16, chloroplastic-like			BRADI_2g38750v3	Outer envelope pore protein 16-1, chloroplastic [Source:Projected from Arabidopsis thaliana (AT2G28900) UniProtKB/Swiss-Prot;Acc:Q9ZV24]		Os05g0111200		Similar to Amino acid selective channel protein						1	turquoise	259		-7.70518e-06	0.0114435	-0.00367722						0.766667	2.81667	1.70667	0.226667	0.9	11.5933	3.39	1.24667	2.32286	-2.58148	3.61561	-1.40111	-3.865	3.49955	1.03934
TraesCS1A03G0079200	TraesCS1A02G034600	TraesCS1A01G034600	TRIAE_CS42_1AS_TGACv1_019003_AA0057670			123074902	LOC123074902	XP_044353597.1	lecithin-cholesterol acyltransferase-like 1						Os02g0589000		Lecithin:cholesterol acyltransferase family protein						1	turquoise	242		-0.00137607	0.00697849	-0.00199814						0.06	0.56	0.466667	0.483333	0.423333	2.46	0.966667	0.716667	2.33747	-0.0560982	2.52785	-0.649307	-0.197295	2.28351	2.19627
TraesCS1A03G0081200	TraesCS1A02G035100	TraesCS1A01G035100	TRIAE_CS42_1AS_TGACv1_019069_AA0059690	Traes_1AS_75839CC28	TaAffx.23026.1.S1_at	123187111	LOC123187111	XP_044454828.1	putative clathrin assembly protein At2g25430			BRADI_2g37120v3	hypothetical protein		Os05g0112101		Epsin-like, N-terminal domain containing protein						2	blue	610		-0.0105612	-0.00380323	0.00961097						3.91	7.54667	1.65333	6.88667	1.54333	3.69333	0.903333	20.4567	0.666026	1.70188	1.0388	3.9517	-0.219573	-2.04049	-1.25542
TraesCS1A03G0082100	TraesCS1A02G035600	TraesCS1A01G035600	TRIAE_CS42_1AS_TGACv1_019945_AA0073150	Traes_1AS_CFFF0EB8B	TaAffx.52945.2.S1_at	123075750	LOC123075750	XP_044354242.1	cysteine-rich repeat secretory protein 55-like			BRADI_2g37150v3	hypothetical protein		Os05g0112800		Protein of unknown function DUF26 domain containing protein						37	skyblue3			-0.00122825	-0.0114407	0.00441535						12.0067	5.82667	12.1367	8.06667	3.94333	2.06333	3.79	13.5133	-0.91503	-1.09715	-0.894035	1.2899	-0.190135	-2.22065	-0.0080174
TraesCS1A03G0084800	TraesCS1A02G036200	TraesCS1A01G036200	TRIAE_CS42_1AS_TGACv1_019860_AA0072280	Traes_1AS_7350AC7C8	Ta.22426.1.S1_x_at	123075962	LOC123075962	XP_044354408.1	fatty-acid-binding protein 3, chloroplastic-like			BRADI_3g10937v3	hypothetical protein		Os02g0320300		Similar to Chalcone isomerase 3						26	darkorange	272		0.00735532	1.29688e-05	-0.000185623						26.3067	12.2867	29.6867	9.56667	28.5067	15.44	34.2767	9.68667	-1.11282	-1.66184	-0.756712	-2.39939	-0.329305	1.15937	0.219712
TraesCS1A03G0098700	TraesCS1A02G041400	TraesCS1A01G041400	TRIAE_CS42_1AS_TGACv1_019165_AA0061960	Traes_1AS_971BBFBD4	Ta.24535.1.S1_at																		17	grey60	34		-0.00450688	-0.00977461	-0.00398418						0	12.6467	0.893333	0.2	0	0.116667	0	0	7.82235	-3.55678	-0.179275	0.310288	-7.43945	-0.658527	3.93967
TraesCS1A03G0104500	TraesCS1A02G043900	TraesCS1A01G043900	TRIAE_CS42_1AS_TGACv1_019990_AA0073620	Traes_1AS_4A6E603D3		123078841	LOC123078841	XP_044357442.1	laccase-25-like isoform X1			BRADI_4g39330v3	hypothetical protein		Os12g0259800	OsLAC30	Similar to Laccase-25		AT3G09220	LAC7	Laccase-7 [Source:UniProtKB/Swiss-Prot;Acc:Q9SR40]		37	skyblue3			-0.00146587	-0.0083868	-0.00322239						2.10333	1.17333	0.706667	0.973333	0	0.0433333	0	0.466667	-0.854333	0.500186	2.53972	5.21956	-0.819244	-2.81086	-2.17376
TraesCS1A03G0106600	TraesCS1A02G044600	TraesCS1A01G044600	TRIAE_CS42_1AS_TGACv1_019292_AA0064450		Ta.27668.1.A1_at	542903	LOC542903	XP_044455640.1	dihydroneopterin aldolase 2	GdcsH									AT5G62980	FOLB2	Dihydroneopterin aldolase 2 [Source:UniProtKB/Swiss-Prot;Acc:Q9FM54]		1	turquoise			0.00276393	0.00658202	-0.000964776						2.88	2.24333	4.24333	1.74667	2.55	7.55333	6.18	2.65	-0.764355	-1.21298	1.69376	-1.61648	-0.278408	2.26243	0.170219
TraesCS1A03G0112500	TraesCS1A02G047000	TraesCS1A01G047000	TRIAE_CS42_1AS_TGACv1_020544_AA0078240	Traes_1AS_7BFBBDCE6	TaAffx.7973.2.S1_at	123187953	LOC123187953	XP_044455901.1	calcium-transporting ATPase 4, endoplasmic reticulum-type-like			BRADI_2g37570v3	hypothetical protein										12	tan	132		-0.0118309	-0.00712041	-0.00377035						5.99667	17.0767	6.17333	25.6533	1.92667	8.02	1.78	19.5067	1.3495	1.83996	1.88393	3.02591	0.390872	-0.928092	-0.0995942
TraesCS1A03G0114500	TraesCS1A02G047300	TraesCS1A01G047300	TRIAE_CS42_1AS_TGACv1_021389_AA0081640	Traes_1AS_FE4CF4197		123080620	LOC123080620	XP_044359513.1	geraniol 8-hydroxylase-like			BRADI_3g35980v3	hypothetical protein		Os10g0351200		Similar to Cytochrome P450 family protein, expressed						3	brown	411		-0.00922579	-0.00457453	0.0133929		-1				0.03	3.92667	0.236667	0.623333	0	0.266667	0	6.96667	6.68419	0.965608	5.13094	9.39361	-3.06605	-4.39369	2.65253
TraesCS1A03G0117100	TraesCS1A02G048700	TraesCS1A01G048700	TRIAE_CS42_1AS_TGACv1_020524_AA0078090	Traes_1AS_BA6D9F02B		123081691	LOC123081691	XP_044360204.1	non-specific lipid transfer protein GPI-anchored 5-like			BRADI_1g55770v3	hypothetical protein		Os07g0175600	OsLTPG18	Plant lipid transfer protein and hydrophobic protein, helical domain containing protein						4	yellow	120		-0.00602619	0.00506188	0.0134493						0.186667	0.206667	0.313333	0.386667	0.0933333	1.52333	0.186667	7.40667	1.1348	1.1209	3.7649	4.31126	0.0867971	-1.79239	0.100698
TraesCS1A03G0119600	TraesCS1A02G049600	TraesCS1A01G049600	TRIAE_CS42_1AS_TGACv1_020611_AA0078800	Traes_1AS_B9D8170A7		123188083	LOC123188083	XP_044456057.1	ABC transporter G family member 5-like						Os05g0120200	OsABCG11	Similar to ATPase, coupled to transmembrane movement of substances						15	midnightblue	33		-0.00417856	0.00435669	0.000282311						0.296667	0.956667	0.476667	1.75667	0.456667	2.38333	0.86	2.01667	1.92051	2.04196	2.28283	0.888288	0.588954	0.584634	0.467501
TraesCS1A03G0125000	TraesCS1A02G051300	TraesCS1A01G051300	TRIAE_CS42_1AS_TGACv1_019485_AA0067220	Traes_1AS_3A70AC2BD	Ta.21116.3.S1_at	123188248	LOC123188248	XP_044456226.1	WEB family protein At5g16730, chloroplastic-like			BRADI_2g37720v3	hypothetical protein										14	cyan	8		-0.00268324	0.00295646	-0.00837534						1.22667	1.13667	1.14667	3.55333	1.03	3.52333	0.716667	0.946667	-0.108804	1.1691	1.61381	-0.340949	1.22582	2.23491	-0.0520854
TraesCS1A03G0129100	TraesCS1A02G052300	TraesCS1A01G052300	TRIAE_CS42_1AS_TGACv1_020075_AA0074520	Traes_1AS_A2ED8DA32	Ta.8906.1.A1_at							BRADI_2g12340v3	hypothetical protein										14	cyan	132		-0.00550784	0.00641606	-0.00484712						0.173333	1.09	0.456667	2.50667	0.373333	3.44333	0.563333	1.61333	2.89509	1.90464	3.64474	1.02003	0.543521	1.78838	1.53398
TraesCS1A03G0137800	TraesCS1A02G056200	TraesCS1A01G056200	TRIAE_CS42_1AS_TGACv1_019081_AA0060210																				38	plum1			0.00769071	0.0142241	-0.00600343						10.76	2.67667	28.78	17.45	41.2833	41.1933	28.4567	8.22333	-1.51554	-0.916605	0.357907	-2.355	1.8776	3.04084	1.27867
TraesCS1A03G0138300	TraesCS1A02G056600	TraesCS1A01G056600	TRIAE_CS42_1AS_TGACv1_019081_AA0060180	Traes_1AS_FDC3AF8A2	Ta.9580.1.S1_at	123188590	LOC123188590	XP_044456682.1	probable uridine nucleosidase 2			BRADI_4g38490v3	hypothetical protein		Os09g0567900		Inosine/uridine-preferring nucleoside hydrolase domain containing protein						2	blue	197		-0.00312709	-0.00477356	0.0143118						3.71667	4.29667	1.78333	2.64667	2.47667	1.16667	3.21	11.61	0.0390597	0.15287	-1.19515	1.14434	-0.969741	-2.7472	-1.08355
TraesCS1A03G0138700	TraesCS1A02G056700	TraesCS1A01G056700	TRIAE_CS42_1AS_TGACv1_019081_AA0060150	Traes_1AS_6B49D5A701		123085180	LOC123085180	XP_044362757.1	disease resistance protein Pik-1-like			BRADI_3g47232v3	hypothetical protein										4	yellow	442		-0.00853001	-0.00546494	0.0119138						1.81	3.16	1.65	2.88667	1.09	1.17	0	12.8267	0.346685	0.730291	1.01992	6.54785	-0.291673	-2.36965	-0.67528
TraesCS1A03G0138800	TraesCS1A02G056800	TraesCS1A01G056800	TRIAE_CS42_1AS_TGACv1_019081_AA0060150	Traes_1AS_6B49D5A701		123085261	LOC123085261	XP_044362846.1	disease resistance protein Pik-1-like			BRADI_3g47200v3	hypothetical protein		Os02g0584800		Heavy metal transport/detoxification protein domain containing protein						4	yellow	118		-0.00338108	0.000984812	0.00768424						0.68	0	0.603333	0.84	0.376667	0.723333	0.183333	3.72	0.409864	-0.522827	0.535073	5.77	-0.171123	-2.72481	0.761569
TraesCS1A03G0138900	TraesCS1A02G056900	TraesCS1A01G056900			Ta.18739.1.A1_at	123085351	LOC123085351	XP_044362942.1	uncharacterized protein LOC123085351			BRADI_4g19641v3	hypothetical protein		Os11g0412484		Hypothetical conserved gene						26	darkorange	21		0.00969086	-0.00595683	0.00934775						8.4	2.98667	11.0867	1.01333	7.19333	1.37333	13.97	3.63333	-1.45131	-4.27574	-3.45117	-2.55942	-2.34751	-1.75659	0.476922
TraesCS1A03G0142800	TraesCS1A02G058900	TraesCS1A01G058900	TRIAE_CS42_1AS_TGACv1_019569_AA0068520	Traes_1AS_89A8F1207	Ta.6685.2.S1_at	123188689	LOC123188689	XP_044456852.1	D-ribulose kinase-like isoform X2			BRADI_1g52670v3	D-ribulose kinase [Source:Projected from Arabidopsis thaliana (AT2G21370) UniProtKB/Swiss-Prot;Acc:Q8L794]		Os07g0409200		Carbohydrate kinase, FGGY domain containing protein		AT2G21370	XK-1	D-ribulose kinase [Source:UniProtKB/Swiss-Prot;Acc:Q8L794]		13	salmon			0.00739467	-0.00208765	-0.00234457						7.64	6.54	22.36	5.14	10.8967	5.06667	21.6833	4.06667	-0.411963	-1.95337	-1.08206	-2.97854	-0.200829	0.814414	1.34058
TraesCS1A03G0143800	TraesCS1A02G059200	TraesCS1A01G059200	TRIAE_CS42_1AS_TGACv1_020446_AA0077520	Traes_1AS_64B6C30861	TaAffx.12155.1.A1_at	123188711	LOC123188711	XP_044456883.1	adenine/guanine permease AZG1-like			BRADI_2g30850v3	AZG1 [Source:Projected from Arabidopsis thaliana (AT3G10960) UniProtKB/TrEMBL;Acc:A0A178VPT2]		Os05g0332600		Xanthine/uracil/vitamin C permease family protein		AT3G10960	AZG1	AZG1 [Source:UniProtKB/TrEMBL;Acc:A0A178VPT2]		6	red			-0.00211233	-0.0048594	0.00677168						0.813333	2.19667	0.91	0.556667	0.61	0.196667	0.756667	2.27333	1.22331	-0.838946	-1.46274	1.1181	-1.88026	-2.78113	0.182
TraesCS1A03G0147100	TraesCS1A02G060700	TraesCS1A01G060700	TRIAE_CS42_1AS_TGACv1_019285_AA0064330	Traes_1AS_621C9CE9F	Ta.9976.2.S1_a_at	123188799	LOC123188799	XP_044456987.1	ribosome biogenesis regulatory protein homolog						Os04g0685100		Ribosomal biogenesis regulatory protein family protein		AT2G37990		Ribosome biogenesis regulatory protein homolog [Source:UniProtKB/Swiss-Prot;Acc:Q9SH88]		27	white			0.00399103	0.000623587	-0.00208925						1.64667	0.703333	4.72	0.853333	1.74	1.67	2.69333	1.21	-1.8718	-2.42039	0.161259	-1.8853	0.705087	1.2384	1.25368
TraesCS1A03G0155800	TraesCS1A02G064000	TraesCS1A01G064000	TRIAE_CS42_1AS_TGACv1_020642_AA0079010	Traes_1AS_1FD6B3E2D		606397	LOC606397	XP_044457166.1	probable beta-1,4-xylosyltransferase GT43A	pglcat4		BRADI_2g37970v3	hypothetical protein		Os05g0123100	OsGT43A	Glycosyl transferase, family 43 protein						14	cyan	89		-0.00791315	0.0092065	-0.0119831						2.95333	4.61667	3.39	18.51	2.56667	24.12	2.37667	6.66	0.818648	2.19445	3.59459	0.646609	1.75176	2.62162	0.375966
TraesCS1A03G0164500	TraesCS1A02G066900	TraesCS1A01G066900	TRIAE_CS42_1AS_TGACv1_019383_AA0065900		Ta.18848.1.S1_at	123189277	LOC123189277	XP_044457593.1	protein SEEDLING PLASTID DEVELOPMENT 1-like			BRADI_1g55007v3	P-loop containing nucleoside triphosphate hydrolases superfamily protein [Source:Projected from Arabidopsis thaliana (AT3G10420) UniProtKB/TrEMBL;Acc:F4J3R7]		Os07g0187400		ATPase, AAA-type, core domain containing protein		AT3G10420	SPD1	P-loop containing nucleoside triphosphate hydrolases superfamily protein [Source:UniProtKB/TrEMBL;Acc:F4J3R7]		47	bisque4	78		-0.0126042	-0.00327755	0.00118548						39.5	239.76	31.1967	216.663	45.5167	84.1133	26.8633	179.127	2.39565	2.43438	0.769123	2.16025	-0.346456	-0.745693	-0.385188
TraesCS1A03G0167500	TraesCS1A02G068400	TraesCS1A01G068400				123090574	LOC123090574	XP_044367852.1	uncharacterized protein At4g08330, chloroplastic-like														2	blue	76		-0.00722589	-0.000411928	0.00614603						3.05	4.34667	0.99	5.38667	2.39667	3.90667	0.91	9.11333	0.303681	2.66148	1.00307	2.67389	0.114449	-0.0991763	-2.24336
TraesCS1A03G0170700	TraesCS1A02G069600	TraesCS1A01G069600	TRIAE_CS42_1AS_TGACv1_020128_AA0074930		Ta.24988.2.S1_x_at	123189473	LOC123189473	XP_044457838.1	zinc finger CCCH domain-containing protein 33-like			BRADI_2g38247v3	hypothetical protein		Os05g0128200	OsC3H33	Hypothetical conserved gene						23	darkturquoise			-0.00563198	-0.00389545	-3.6212e-05						55.0633	46.2567	62.35	59.18	32.1567	57.16	11.96	86.1867	-0.312482	-0.159513	0.929765	2.35633	0.320739	-0.0460908	0.16777
TraesCS1A03G0171300	TraesCS1A02G069900	TraesCS1A01G069900	TRIAE_CS42_1AS_TGACv1_019017_AA0058010	Traes_1AS_5D942BC8F	TaAffx.31317.1.S1_at	123091412	LOC123091412	XP_044368880.1	uncharacterized protein LOC123091412			BRADI_2g38237v3	hypothetical protein		Os05g0128100		Hypothetical conserved gene						22	darkgreen			0.00957696	0.00546195	-0.00761334						19.3467	11.9233	46.7533	8.94667	20.56	33.1767	68.4267	6.18667	-0.881276	-2.79302	0.899213	-3.97492	-0.595009	3.10233	1.31673
TraesCS1A03G0172500	TraesCS1A02G070400	TraesCS1A01G070400	TRIAE_CS42_1AS_TGACv1_019570_AA0068550	Traes_1AS_F3EAEC435		100049055	LOC100049055	XP_044457923.1	probable WRKY transcription factor 26 isoform X2	WRKY,WRKY53,WRKY53-b		BRADI_2g00280v3	hypothetical protein		Os05g0343400	WRKY53	WRKY transcription factor, Disease resistance, Defense respons						41	lightsteelblue1			-0.00978001	-0.0103602	0.00551992						63.2367	44.2167	28.4733	23.9133	14.5967	32.59	1.42	83.31	-0.626901	-0.480178	1.01115	5.32368	-1.09856	-0.875135	-1.24528
TraesCS1A03G0172700	TraesCS1A02G070600	TraesCS1A01G070600			Ta.22231.1.S1_at	123189554	LOC123189554	XP_044457934.1	putative serine/threonine-protein kinase-like protein CCR3			BRADI_2g38200v3	Putative serine/threonine-protein kinase-like protein CCR3 [Source:Projected from Arabidopsis thaliana (AT3G55950) UniProtKB/Swiss-Prot;Acc:Q9LY50]		Os05g0127300	OsCRR3	Serine/threonine protein kinase domain containing protein		AT3G55950	CCR3	Putative serine/threonine-protein kinase-like protein CCR3 [Source:UniProtKB/Swiss-Prot;Acc:Q9LY50]		2	blue	134		-0.00475817	-0.0033255	0.0106815						1.18	1.78667	2.06667	1.10333	0.656667	0.903333	0.583333	7.96	0.4367	-1.22849	0.459788	3.15077	-0.921106	-2.49193	0.74408
TraesCS1A03G0173200	TraesCS1A02G070800	TraesCS1A01G070800	TRIAE_CS42_1AS_TGACv1_020415_AA0077410			123091848	LOC123091848	XP_044369406.1	BTB/POZ and MATH domain-containing protein 2-like														45	darkorange2			0.00266285	0.0012396	0.00200364						0.353333	0.396667	0.586667	0.733333	1.16333	0.21	2.12667	0.54	0.150803	-0.662218	-2.20495	-3.0324	0.0913254	-0.126736	0.904347
TraesCS1A03G0176100	TraesCS1A02G072100	TraesCS1A01G072100	TRIAE_CS42_1AS_TGACv1_018963_AA0057030	Traes_1AS_70B578B13		123189770	LOC123189770	XP_044458196.1	endoglucanase 14-like			BRADI_2g38357v3	hypothetical protein		Os05g0129200	OsGH9B12	Endoglucanase 14		AT2G44550	AtGH9B10	Endoglucanase 13 [Source:UniProtKB/Swiss-Prot;Acc:O64890]		30	steelblue			0.0028452	0.00106495	0.0039024						11.73	4.42667	6.61667	2.80333	6.80667	9.43667	5.48333	6.10667	-3.9194	-1.69475	0.544262	2.851	0.38141	0.598579	-1.84323
TraesCS1A03G0181200	TraesCS1A02G074800	TraesCS1A01G074800	TRIAE_CS42_1AS_TGACv1_019494_AA0067350	Traes_1AS_1701F7F96		123189895	LOC123189895	XP_044458348.1	uncharacterized protein LOC123189895			BRADI_2g38470v3	hypothetical protein		Os05g0131900		Hypothetical conserved gene						16	lightcyan	107		-0.00898789	0.00699903	-0.00442143						5.16	11.6033	5.16667	24.5333	4.35667	28.5567	6.68333	19.9067	1.17028	1.92709	2.77906	1.16718	0.818098	1.02561	0.0612906
TraesCS1A03G0181600	TraesCS1A02G075000	TraesCS1A01G075000	TRIAE_CS42_1AS_TGACv1_019494_AA0067320	Traes_1AS_0EAA8A0B4	Ta.4650.1.A1_at	123189915	LOC123189915	XP_044458372.1	long chain acyl-CoA synthetase 1-like			BRADI_2g38490v3	hypothetical protein		Os05g0132100	OsLACS1	AMP-dependent synthetase and ligase domain containing protein		AT2G47240	LACS1	Long chain acyl-CoA synthetase 1 [Source:UniProtKB/Swiss-Prot;Acc:O22898]		17	grey60	47		-0.00238356	-0.00227352	-0.00221692						1.67	5.37	1.35667	1.31	2.25667	2.83	0.33	0.963333	1.647	-0.323602	0.500433	0.621568	-2.41478	1.93427	-0.444176
TraesCS1A03G0186700	TraesCS1A02G076500	TraesCS1A01G076500	TRIAE_CS42_1AS_TGACv1_019089_AA0060430																				6	red	159		-0.00592419	-0.00467273	0.00815766		-1				0.133333	2.56333	0.0766667	0.406667	0.0266667	0.04	0	2.37	4.34491	2.28688	0.792614	7.03091	-2.30909	-4.40731	-0.251062
TraesCS1A03G0187800	TraesCS1A02G076900	TraesCS1A01G076900	TRIAE_CS42_1AS_TGACv1_019173_AA0062080	Traes_1AS_D930B0312	Ta.25294.1.S1_at	123190226	LOC123190226	XP_044458773.1	protein LNK4-like			BRADI_2g10880v3	hypothetical protein										18	lightgreen			-0.0139126	0.0078215	-0.00635803						1.24333	5.56333	0.226667	29.3933	3.68333	15.4533	0.166667	7.33667	2.09146	7.07406	1.9882	4.54154	1.97171	1.7256	-3.0109
TraesCS1A03G0193000	TraesCS1A02G078800	TraesCS1A01G078800			Ta.24150.1.S1_at	123190330	LOC123190330	XP_044458890.1	probable glutathione S-transferase GSTF1			BRADI_2g13110v3	hypothetical protein		Os01g0371200	OsGSTF1	Similar to Glutathione-S-transferase 19E50						16	lightcyan	187		-0.0160472	0.00724037	-0.00729094						17.6667	85.3333	14.1933	125.493	10.1633	175.53	10.0833	93.38	2.07389	2.80338	3.94245	2.74428	0.445842	1.46586	-0.283649
TraesCS1A03G0193600	TraesCS1A02G079400	TraesCS1A01G079400	TRIAE_CS42_1AS_TGACv1_019480_AA0067160	Traes_1AS_6C84785B3		123190339	LOC123190339	XP_044458902.1	peroxidase 5-like			BRADI_2g37000v3	hypothetical protein		Os05g0135500	prx71	Haem peroxidase family protein						33	darkolivegreen			0.0038962	0.000224806	0.00409846						0.336667	1.35	1.7	1.10667	3.15667	0.223333	3.95667	0.983333	1.54004	-1.15001	-3.08809	-2.73885	-0.965702	-0.899326	1.72434
TraesCS1A03G0195200	TraesCS1A02G080600	TraesCS1A01G080600	TRIAE_CS42_1AS_TGACv1_020744_AA0079730	Traes_1AS_1234FA28F		123190439	LOC123190439	XP_044459016.1	CBL-interacting protein kinase 17-like	CIPK17													17	grey60			0.000842906	-0.00285386	0.00574245						3.25667	6.40333	4.51667	1.29	4.99	3.42333	2.47667	3.47333	0.923538	-1.61964	-0.521128	-0.0387858	-2.10727	0.533601	0.435902
TraesCS1A03G0200300	TraesCS1A02G082100	TraesCS1A01G082100	TRIAE_CS42_1AS_TGACv1_020885_AA0080320			123190518	LOC123190518	XP_044459110.1	uncharacterized protein LOC123190518			BRADI_2g36859v3	hypothetical protein										26	darkorange	6		0.0042296	-0.00200717	0.000749248						2.5	1.30667	2.66333	0.856667	1.72667	0.893333	3.76667	1.09	-0.922917	-1.93444	-0.659609	-2.38099	-0.902396	0.97557	0.109124
TraesCS1A03G0200400	TraesCS1A02G082200	TraesCS1A01G082200	TRIAE_CS42_1AS_TGACv1_020869_AA0080260	Traes_1AS_188F596C7	Ta.7968.2.S1_at	123096523	LOC123096523	XP_044374242.1	1,4-dihydroxy-2-naphthoyl-CoA thioesterase 1-like			BRADI_2g36856v3	hypothetical protein		Os05g0137700		Similar to thioesterase family protein						9	magenta	23		-0.00523201	0.00360108	0.00250628						15.3833	20.53	6.21667	26.79	14.83	24.77	12.81	27.2033	0.33957	2.02434	0.8937	0.552328	0.28555	0.577492	-1.39922
TraesCS1A03G0200500	TraesCS1A02G082300	TraesCS1A01G082300	TRIAE_CS42_1AS_TGACv1_019457_AA0066770		TaAffx.51805.1.S1_at	123096665	LOC123096665	XP_044374387.1	uncharacterized protein LOC123096665														1	turquoise	698		-0.00217888	0.0079518	-0.00693247						0	0	0	0.54	0	2.64	0	0.0666667	0	4.45175	6.45796	1.87826	4.39053	5.46698	0
TraesCS1A03G0200700	TraesCS1A02G082500	TraesCS1A01G082500	TRIAE_CS42_1AS_TGACv1_020003_AA0073770	Traes_1AS_3CABBFC7E	Ta.12995.1.S1_at	123110974	LOC123110974	XP_044387568.1	hydrophobic protein LTI6B			BRADI_2g36770v3	hypothetical protein						AT3G05880	RCI2A	RCI2A [Source:UniProtKB/TrEMBL;Acc:A0A178V7D5]		20	royalblue			0.00685828	-0.00593129	-0.00340204						22.5267	2.18	18.8133	3.02	14.34	6.46	1.42	2.39	-3.40558	-3.01099	-1.37161	-0.248946	0.191408	2.14921	-0.203184
TraesCS1A03G0201700	TraesCS1A02G083000	TraesCS1A01G083000	TRIAE_CS42_1AS_TGACv1_019045_AA0058870		TaAffx.83500.1.S1_at	123190549	LOC123190549	XP_044459158.1	transcription factor APG-like isoform X2			BRADI_2g36740v3	Helix-loop-helix DNA-binding domain containing protein [Source: Projected from Oryza sativa (Os05g0139100)]		Os05g0139100	APG	Helix-loop-helix DNA-binding domain containing protein						46	brown4			-0.00441907	0.00595589	0.00135896						0.0366667	0.54	0.323333	0.696667	0.1	2.16667	0.356667	1.92333	3.34964	1.34453	4.8985	1.87258	0.294994	0.931948	2.3001
TraesCS1A03G0205300	TraesCS1A02G084500	TraesCS1A01G084500	TRIAE_CS42_1AS_TGACv1_019701_AA0070210	Traes_1AS_AF3DE09D3								BRADI_2g36640v3	hypothetical protein		Os05g0141700		Phosphoglycerate mutase domain containing protein		AT3G05170		Phosphoglycerate mutase-like protein AT74 [Source:UniProtKB/Swiss-Prot;Acc:Q9MAA2]		9	magenta	259		-0.0053597	0.00318961	-0.0016725						1.13333	2.99	1.52	3.93333	0.943333	4.00667	1.75	4.17667	1.35429	1.25963	2.06703	0.834053	0.2405	0.454123	0.335163
TraesCS1A03G0205600	TraesCS1A02G084600	TraesCS1A01G084600	TRIAE_CS42_1AS_TGACv1_019154_AA0061750	Traes_1AS_F5BFC72C51								BRADI_2g36612v3	hypothetical protein										3	brown	135		-0.00637973	-0.0043816	0.0112077		-1				0.596667	4.88333	1.55	0	0	1.13	0.356667	6.33333	2.20608	-1.98195	0.666552	2.69928	-3.58926	-3.9415	0.598768
TraesCS1A03G0206000	TraesCS1A02G084800	TraesCS1A01G084800	TRIAE_CS42_1AS_TGACv1_019319_AA0064890	Traes_1AS_AA023B6B2	Ta.22272.1.S1_at	123097084	LOC123097084	XP_044374809.1	uncharacterized protein LOC123097084						Os05g0142100		Conserved hypothetical protein						3	brown	576		-0.0199969	-0.0104856	0.0114753						2.85333	55.54	3.52667	24.0667	2.46333	4.42	0.67	73.9067	3.75744	2.81257	1.5298	5.84445	-0.74421	-3.55343	0.200668
TraesCS1A03G0206200	TraesCS1A02G084900	TraesCS1A01G084900			Ta.5925.1.S1_at	123087932	LOC123087932	XP_044365984.1	uncharacterized protein LOC123087932			BRADI_2g36600v3	hypothetical protein										31	paleturquoise			0.00116349	-0.00833011	0.00448006						4.21667	5.98333	4.24667	2.15333	2.41	0.816667	4.05	3.39667	0.407533	-0.876169	-2.01681	-1.12912	-1.48517	-1.52089	-0.201467
TraesCS1A03G0207300	TraesCS1A02G085400	TraesCS1A01G085400	TRIAE_CS42_1AS_TGACv1_019361_AA0065590	Traes_1AS_60C6924681		123097402	LOC123097402	XP_044375080.1	uncharacterized protein LOC123097402			BRADI_2g36580v3	hypothetical protein										32	violet	8		0.00645066	-0.00349642	0.0116514						15.4733	8.66333	11.1367	3.37	14.21	4.31	18.0667	10.47	-0.897551	-2.52957	-2.24761	-1.39169	-2.07809	-1.02324	-0.446065
TraesCS1A03G0211100	TraesCS1A02G087100	TraesCS1A01G087100	TRIAE_CS42_1AS_TGACv1_020495_AA0077840	Traes_1AS_180C8DF63		123190911	LOC123190911	XP_044459578.1	uncharacterized protein LOC123190911			BRADI_3g46360v3	hypothetical protein		Os02g0566400		Similar to OSIGBa0152K17.7 protein						43	ivory			0.00337729	-0.00196712	0.00355885						0.993333	1.43667	3.11667	0.933333	1.73333	0.48	3.70333	1.59	0.458553	-2.13888	-1.99294	-2.10662	-0.952387	-1.08077	1.64505
TraesCS1A03G0212200	TraesCS1A02G087500	TraesCS1A01G087500	TRIAE_CS42_1AS_TGACv1_019749_AA0070940	Traes_1AS_31CFA7F8A	TaAffx.113262.1.S1_at	123190935	LOC123190935	XP_044459600.1	alpha-mannosidase-like			BRADI_3g21117v3	hypothetical protein		Os10g0140200		Glycoside hydrolase, family 38 domain containing protein		AT5G66150		Probable alpha-mannosidase At5g66150 [Source:UniProtKB/Swiss-Prot;Acc:Q9FKW9]		5	green	763		-0.00939573	-0.00310403	0.000490291						1.60333	6.36	1.69333	7.32333	0.933333	2.66	0.87	8	1.57723	1.47219	0.818737	2.08603	-0.0142547	-1.06137	0.0907808
TraesCS1A03G0215100	TraesCS1A02G088600	TraesCS1A01G088600	TRIAE_CS42_1AS_TGACv1_019739_AA0070830	Traes_1AS_32F5EC9D2	Ta.25845.1.S1_at	123191080	LOC123191080	XP_044459787.1	probable sucrose-phosphatase 3			BRADI_2g36350v3	hypothetical protein										3	brown	488		-0.00705494	-0.00334069	0.0103708						1.32333	3.81667	0.356667	1.73	0.94	1.02	0.393333	6.27667	1.59427	1.95463	-0.167118	2.98502	-1.16479	-2.24863	-1.52516
TraesCS1A03G0217700	TraesCS1A02G089600	TraesCS1A01G089600	TRIAE_CS42_1AS_TGACv1_020114_AA0074820	Traes_1AS_A12B2DC63	Ta.28756.2.S1_at	123191186	LOC123191186	XP_044459909.1	1-aminocyclopropane-1-carboxylate oxidase-like			BRADI_2g35860v3	hypothetical protein		Os05g0149400	ACO5	ACC oxidase, Ethylene biosynthesi						23	darkturquoise			-0.000134391	-0.011591	0.0131576						350.89	181.27	253.25	93.7367	197.343	90.24	55.3433	313.84	-0.981537	-0.556197	-1.2225	1.90549	-0.259596	-0.94044	-0.684935
TraesCS1A03G0217900	TraesCS1A02G089800	TraesCS1A01G089800	TRIAE_CS42_1AS_TGACv1_020762_AA0079790	Traes_1AS_4F03F69AA	Ta.25734.1.A1_at	123191189	LOC123191189	XP_044459916.1	protein O-glucosyltransferase 1-like			BRADI_2g35840v3	hypothetical protein		Os05g0149500		Similar to lipopolysaccharide-modifying protein		AT1G07220		F10K1.7 protein [Source:UniProtKB/TrEMBL;Acc:Q9LML4]		26	darkorange			0.00439694	-0.00162458	-8.03045e-05						3.13	3.22	6.71667	3.62	5.23333	1.96333	9.07	2.76	-0.319673	-1.15765	-1.47602	-2.16922	0.0648039	-0.16549	0.902781
TraesCS1A03G0222200	TraesCS1A02G091600	TraesCS1A01G091600	TRIAE_CS42_1AS_TGACv1_020151_AA0075210	Traes_1AS_C9FF7774B								BRADI_2g35700v3	hypothetical protein										32	violet	75		0.0056789	-0.00233433	0.00198794			A			2.04667	0.313333	1.13	0.26	1.43667	0.146667	2.08667	0.253333	-2.80491	-1.57385	-2.76181	-3.45154	0.368958	0.0577035	-0.862104
TraesCS1A03G0227100	TraesCS1A02G093800	TraesCS1A01G093800	TRIAE_CS42_1AS_TGACv1_019467_AA0067000	Traes_1AS_A29124227		123191454	LOC123191454	XP_044460121.1	REF/SRPP-like protein OsI_017815			BRADI_2g35600v3	hypothetical protein		Os05g0151300		Rubber elongation factor family protein						6	red	603		-0.00850478	-0.00759493	0.00284246						68.06	153.263	75.6167	139.597	43.79	62.0867	28.7767	194.597	1.06725	0.701289	0.412029	2.24765	-0.287278	-1.17862	0.07868
TraesCS1A03G0231700	TraesCS1A02G095600	TraesCS1A01G095600	TRIAE_CS42_1AS_TGACv1_020673_AA0079230	Traes_1AS_6B82B6F0D	TaAffx.105485.1.S1_at	123191629	LOC123191629	XP_044460230.1	WAT1-related protein At5g64700-like			BRADI_2g39677v3	hypothetical protein		Os05g0106200	OsUMAMIT8	Protein of unknown function DUF6, transmembrane domain containing protein		AT5G64700		WAT1-related protein At5g64700 [Source:UniProtKB/Swiss-Prot;Acc:Q9FGG3]		5	green	103		-0.00663629	-0.00693389	-0.000692238						1.12333	3.81	1.57667	2.9	0.246667	0.763333	0.22	3.29	1.6717	0.380309	1.89062	2.87587	-0.685193	-1.12291	0.606194
TraesCS1A03G0231900	TraesCS1A02G095800	TraesCS1A01G095800	TRIAE_CS42_1AS_TGACv1_020094_AA0074640	Traes_1AS_88CF20B0A		123191638	LOC123191638	XP_044460247.1	leucine aminopeptidase 2, chloroplastic-like isoform X3			BRADI_3g21200v3	hypothetical protein										5	green	307		-0.0118793	-0.0134222	0.000769616						2.25333	9.14333	1.57	9.48	0.133333	0.376667	0.116667	8.66333	1.74043	2.4471	0.642611	5.37893	0.00295911	-4.4134	-0.703711
TraesCS1A03G0233400	TraesCS1A02G097000	TraesCS1A01G097000	TRIAE_CS42_1AS_TGACv1_020750_AA0079750	Traes_1AS_FBD1793BD	Ta.10093.1.A1_at	123191751	LOC123191751	XP_044460307.1	NAD(P)H-quinone oxidoreductase subunit S, chloroplastic-like			BRADI_3g21280v3	hypothetical protein		Os07g0196200		Protein of unknown function DUF3252 domain containing protein		AT4G23890	ndhS	NAD(P)H-quinone oxidoreductase subunit S, chloroplastic [Source:UniProtKB/Swiss-Prot;Acc:Q9T0A4]		13	salmon	1		0.00695278	-0.002273	-0.00156543						148.52	106.997	260.94	84.3667	158.803	88.2267	280.743	70.08	-0.663953	-1.80636	-0.90351	-2.45813	-0.405875	0.592644	0.736529
TraesCS1A03G0241000	TraesCS1A02G099000	TraesCS1A01G099000	TRIAE_CS42_1AS_TGACv1_021408_AA0081680	Traes_1AS_3D390A0EB	Ta.24763.1.S1_at	123191968	LOC123191968	XP_044460421.1	protein SYM1-like			BRADI_1g15450v3	hypothetical protein		Os03g0583800		Mpv17/PMP22 family protein		AT1G52870		At1g52870/F14G24_14 [Source:UniProtKB/TrEMBL;Acc:Q9C933]		10	purple	75		-0.0111251	-0.00635218	0.00963804						59.8367	172.19	18.8433	88.0733	53.54	47.5633	10.9933	160.047	1.44252	2.06374	-0.161011	3.34482	-1.05945	-1.25348	-1.68067
TraesCS1A03G0241600	TraesCS1A02G099300	TraesCS1A01G099300	TRIAE_CS42_1AS_TGACv1_019520_AA0067600	Traes_1AS_488596E82	Ta.8128.2.S1_a_at	123191989	LOC123191989	XP_044460431.1	dnaJ protein ERDJ3B-like			BRADI_2g34950v3	DnaJ protein ERDJ3B [Source:Projected from Arabidopsis thaliana (AT3G62600) UniProtKB/Swiss-Prot;Acc:Q9LZK5]		Os05g0156500	OsDjB6	Similar to Apobec-1 binding protein 2		AT3G62600	ERDJ3B	DnaJ protein ERDJ3B [Source:UniProtKB/Swiss-Prot;Acc:Q9LZK5]		5	green	288		-0.00974959	-0.00946888	0.000214076						15.7933	42.85	15.47	51.1133	7.38667	10.5467	7.43333	46.9433	1.424	1.44385	0.399471	2.10868	-0.0347181	-1.70778	-0.0545644
TraesCS1A03G0243300	TraesCS1A02G099900	TraesCS1A01G099900	TRIAE_CS42_1AS_TGACv1_019131_AA0061190	Traes_1AS_783C084B6		123038268	LOC123038268	XP_044318075.1	uncharacterized protein LOC123038268			BRADI_2g36067v3	hypothetical protein										12	tan	346		-0.00730493	-0.000649482	0.000571205						0.29	1.82	0.48	2.67	0.316667	1.19333	0.0833333	2.85333	1.97922	1.63965	1.84384	3.78952	0.201416	-1.08797	0.54098
TraesCS1A03G0248900	TraesCS1A02G102500	TraesCS1A01G102500	TRIAE_CS42_1AS_TGACv1_020363_AA0076980	Traes_1AS_08D3BAF83	Ta.22346.1.S1_at	123038620	LOC123038620	XP_044318136.1	probable 4-hydroxy-tetrahydrodipicolinate reductase 1, chloroplastic			BRADI_3g11590v3	hypothetical protein		Os02g0436400		NAD(P)-binding domain containing protein		AT3G59890	DAPB2	4-hydroxy-tetrahydrodipicolinate reductase 2, chloroplastic [Source:UniProtKB/Swiss-Prot;Acc:Q8LB01]		28	skyblue			0.00339481	-0.00196457	-0.00905282						2.44	0.506667	4.95667	2.12333	0.953333	1.52333	2.00333	0.673333	-2.35214	-1.99378	0.603669	-1.17532	1.4941	1.25082	1.13575
TraesCS1A03G0249300	TraesCS1A02G102800	TraesCS1A01G102800	TRIAE_CS42_1AS_TGACv1_019317_AA0064830	Traes_1AS_00BD72553	Ta.30944.1.S1_s_at	123102893	LOC123102893	XP_044380318.1	glutathione S-transferase 4-like			BRADI_2g35980v3	hypothetical protein										1	turquoise			0.00144266	0.00146253	-0.00795004						5.9	3.39	5.86333	3.43	2.39	11.1467	3.58	2.02	-0.877256	-0.77573	2.20571	-0.952839	0.0328491	2.96801	-0.0686748
TraesCS1A03G0258600	TraesCS1A02G106700	TraesCS1A01G106700				123039050	LOC123039050	XP_044318296.1	uncharacterized protein LOC123039050														3	brown			7.86206e-06	-0.00740056	0.00977668						3.62333	8.48667	8.27	2.91333	3.62	1.67667	7.45	9.90333	0.897295	-1.31265	-1.18234	-0.069743	-1.27169	-2.21161	0.938246
TraesCS1A03G0260900	TraesCS1A02G108100	TraesCS1A01G108100	TRIAE_CS42_1AS_TGACv1_019370_AA0065700	Traes_1AS_34EBE13DB	TaAffx.107196.1.S1_at	123039254	LOC123039254	XP_044318429.1	receptor-like protein kinase HERK 1			BRADI_2g34700v3	hypothetical protein										20	royalblue			0.00393559	-0.00239066	-0.00344308						6.73333	2.97667	5.75	2.00333	3.38	3.67667	4.00333	1.72333	-1.34163	-2.04922	0.368566	-1.75401	-0.898519	1.71253	-0.190931
TraesCS1A03G0261500	TraesCS1A02G108400	TraesCS1A01G108400	TRIAE_CS42_1AS_TGACv1_019606_AA0068940	Traes_1AS_EB43CB105		123104339	LOC123104339	XP_044382134.1	peroxidase 5-like			BRADI_2g34717v3	hypothetical protein		Os05g0162000	prx72	Similar to Peroxidase (Fragment)						11	greenyellow	548		-0.00419215	0.0109243	-0.0136284						1.1	1.28667	2.18333	4.91333	0.723333	13.53	1.73667	1.74	0.0673473	0.957898	4.35072	-0.726638	1.63654	3.57912	0.745991
TraesCS1A03G0264000	TraesCS1A02G109100	TraesCS1A01G109100	TRIAE_CS42_1AS_TGACv1_020422_AA0077450	Traes_1AS_4F0148D96																			44	floralwhite	264		-0.0033923	0.00523382	-0.00211823			B			0.0733333	0.656667	0.183333	0.68	0.11	2.2	0.176667	0.723333	2.6933	2.14552	4.70275	1.95117	-0.00881691	1.83325	0.53896
TraesCS1A03G0266000	TraesCS1A02G110000	TraesCS1A01G110000	TRIAE_CS42_U_TGACv1_642056_AA2110310	Traes_1AS_3FCCD2735	TaAffx.84937.1.S1_at	123039534	LOC123039534	XP_044318599.1	probable serine/threonine-protein kinase PBL12			BRADI_3g37600v3	hypothetical protein		Os08g0457400	OsRLCK255	Similar to Avr9/Cf-9 induced kinase 1						23	darkturquoise			-0.00808718	-0.00711848	0.00395163						10.3033	8.91667	9.31	7.94333	4.99	9.05667	0.07	20.03	-0.396842	-0.626015	0.770331	7.68988	-0.451468	-0.774774	-0.222296
TraesCS1A03G0268100	TraesCS1A02G111000	TraesCS1A01G111000	TRIAE_CS42_1AS_TGACv1_019973_AA0073380	Traes_1AS_A6EF18CC1		123039690	LOC123039690	XP_044318677.1	zinc transporter 6-like isoform X1			BRADI_2g34560v3	Transition metal ion transporter, Ion transpor [Source: Projected from Oryza sativa (Os05g0164800)]		Os05g0164800	ZIP6	Transition metal ion transporter, Ion transpor		AT2G30080	ZIP6	ZIP6 [Source:UniProtKB/TrEMBL;Acc:A0A178VN05]		2	blue	1052		-0.00990988	-0.00310436	0.00796227						6.63	19.3233	5.18333	16.6667	5.38667	8.36	3.63667	36.4767	1.37429	1.53813	0.561097	2.61414	-0.339809	-1.50495	-0.503657
TraesCS1A03G0271400	TraesCS1A02G111800	TraesCS1A01G111800	TRIAE_CS42_1AS_TGACv1_020379_AA0077100	Traes_1AS_868CEA71B		123105542	LOC123105542	XP_044383593.1	uncharacterized protein LOC123105542			BRADI_2g34507v3	hypothetical protein		Os05g0165500		Conserved hypothetical protein						44	floralwhite	6		-0.00607088	0.00436151	-0.000924748						0.436667	1.68333	0.476667	1.35	0.356667	3.97667	0.173333	2.19	1.56557	2.036	3.78791	2.75057	-0.102782	0.972929	-0.573219
TraesCS1A03G0272800	TraesCS1A02G112200	TraesCS1A01G112200	TRIAE_CS42_1AS_TGACv1_020405_AA0077220	Traes_1AS_4C5DB717C		123039912	LOC123039912	XP_044318826.1	protein NETWORKED 4B-like			BRADI_2g34460v3	hypothetical protein		Os05g0168800		KIP1-like domain containing protein						7	black	70		0.00631353	-0.00251936	-0.00199296			A			6.06667	1.14333	4.71667	2.25	4.41667	1.61333	4.29	1.19333	-2.43959	-1.59406	-1.66963	-2.33205	0.57132	0.744503	-0.274211
TraesCS1A03G0273200	TraesCS1A02G112600	TraesCS1A01G112600	TRIAE_CS42_1AS_TGACv1_018976_AA0057210	Traes_1AS_4A925522B	TaAffx.9187.1.S1_at							BRADI_2g34430v3	hypothetical protein										15	midnightblue	98		-0.00732292	0.00709702	-0.00366916			B			6.37333	14.79	5.88667	16.97	5.26	32.97	6.36333	15.67	1.07453	1.31217	2.68926	1.00823	0.0561824	1.64234	-0.181455
TraesCS1A03G0276000	TraesCS1A02G113100	TraesCS1A01G113100	TRIAE_CS42_1AS_TGACv1_019035_AA0058510	Traes_1AS_B26B7D59F		123105738	LOC123105738	XP_044383835.1	arabinogalactan protein 16-like			BRADI_2g31980v3	hypothetical protein										1	turquoise	299		-0.000382712	0.0103324	-0.00654373						0.846667	0.116667	0.62	0.75	0.103333	6.15	1.54667	0.673333	-1.98782	-0.892951	5.02055	-2.0968	1.76867	3.9057	0.673812
TraesCS1A03G0276200	TraesCS1A02G113300	TraesCS1A01G113300	TRIAE_CS42_1AS_TGACv1_019035_AA0058480	Traes_1AS_863D41595								BRADI_1g14983v3	hypothetical protein										47	bisque4	5		-0.0108022	-0.00232447	-0.00821092						6.40667	32.42	7.59	35.5733	4.13	16.53	4.54667	16.84	2.2904	2.16647	2.12316	1.66548	0.0327347	0.367288	0.15667
TraesCS1A03G0281400	TraesCS1A02G115200	TraesCS1A01G115200	TRIAE_CS42_1AS_TGACv1_019260_AA0064030		TaAffx.31713.1.S1_at	123040177	LOC123040177	XP_044319037.1	phosphoenolpyruvate/phosphate translocator 3, chloroplastic-like			BRADI_2g34300v3	hypothetical protein										38	plum1			0.00355532	-0.00589682	0.00750239						10.59	9.79	14.6833	8.9	19.9967	3.84667	14.6367	11.68	-0.269438	-1.02614	-2.18778	-0.859078	-0.279753	-0.883285	0.476953
TraesCS1A03G0282000	TraesCS1A02G115400	TraesCS1A01G115400	TRIAE_CS42_1AS_TGACv1_019260_AA0064010	Traes_1AS_A3300ED18	TaAffx.59613.1.S1_at	123106359	LOC123106359	XP_044384513.1	embryo-specific protein ATS3A-like			BRADI_2g34280v3	hypothetical protein		Os05g0171200		Embryo-specific 3 family protein						1	turquoise			0.00381134	0.0129895	-0.0105163						0.673333	0.66	4.56667	0.616667	1.16333	11.03	4.36667	0.506667	-0.0964794	-2.61561	4.13131	-2.76309	0.0498464	4.4218	2.56898
TraesCS1A03G0283100	TraesCS1A02G115700	TraesCS1A01G115700	TRIAE_CS42_1AS_TGACv1_019861_AA0072290	Traes_1AS_93F262E7F	Ta.8571.1.S1_x_at	123040228	LOC123040228	XP_044319067.1	uncharacterized protein LOC123040228										AT1G80160		F18B13.24 protein [Source:UniProtKB/TrEMBL;Acc:Q9SSC3]		10	purple			-0.00821955	-0.00913893	0.0138838						4.16667	12.0167	0.416667	0.593333	0.65	1.39333	0.0966667	8.04	1.25198	0.48223	1.18524	5.28801	-3.76926	-2.33547	-2.99951
TraesCS1A03G0286500	TraesCS1A02G116800	TraesCS1A01G116800	TRIAE_CS42_1AS_TGACv1_020251_AA0075980	Traes_1AS_66A759B84																			42	lightcyan1			0.00328861	-0.00695834	-0.00104607						2.47667	0.373333	2.07333	0.233333	0.82	0.11	0.173333	0.27	-2.77011	-3.89708	-2.42352	-1.37181	-1.44715	0.498137	-0.320173
TraesCS1A03G0286700	TraesCS1A02G116900	TraesCS1A01G116900	TRIAE_CS42_U_TGACv1_641361_AA2093040	Traes_1AS_A3DCEEB591	Ta.13152.2.S1_at	123040416	LOC123040416	XP_044319203.1	uncharacterized protein LOC123040416														23	darkturquoise			0.000913689	-0.00477113	0.00652224						38.8767	18.7367	37.2933	11.3	21.58	18.8267	12.5067	36.0067	-1.10969	-2.18674	-0.0539469	1.04133	-1.10142	-0.258234	-0.0243673
TraesCS1A03G0287600	TraesCS1A02G117400	TraesCS1A01G117400	TRIAE_CS42_1AS_TGACv1_019883_AA0072390	Traes_1AS_D81B1496F	Ta.12226.2.S1_x_at	123040445	LOC123040445	XP_044319223.1	uncharacterized protein LOC123040445			BRADI_2g34120v3	hypothetical protein		Os05g0176700		Conserved hypothetical protein						6	red	51		-0.00875268	0.00159904	0.00410782						0.26	4.23667	0.09	2.40333	0.68	2.12333	0.3	4.02667	2.92428	5.62439	1.92477	2.57682	-1.13596	-0.0406488	-3.83613
TraesCS1A03G0288300	TraesCS1A02G117700	TraesCS1A01G117700	TRIAE_CS42_1AS_TGACv1_019901_AA0072630	Traes_1AS_D0003358A		123040506	LOC123040506	XP_044319268.1	UDP-glycosyltransferase 73E1-like			BRADI_2g34090v3	hypothetical protein		Os05g0177500		UDP-glucuronosyl/UDP-glucosyltransferase family protein						16	lightcyan	32		-0.00478451	0.00538178	-0.00244232						0.03	0.616667	0.55	2.09	0.226667	2.10333	0.536667	1.74667	2.5559	1.49209	2.93012	1.12868	1.1626	0.754276	2.22641
TraesCS1A03G0290100	TraesCS1A02G118200	TraesCS1A01G118200	TRIAE_CS42_1AS_TGACv1_019030_AA0058410									BRADI_2g34048v3	hypothetical protein		Os05g0178300	OsCDT5	Similar to Cadmium tolerant 1						43	ivory			0.00772944	-0.000923803	-0.00702863						1.69667	0	7.28333	4.99667	4.48	0	10.7133	0	-0.265523	-1.61521	-2.01594	-2.38384	0.316235	-0.682307	1.66593
TraesCS1A03G0292200	TraesCS1A02G119000	TraesCS1A01G119000	TRIAE_CS42_1AS_TGACv1_019928_AA0072940	Traes_1AS_C2B3C23C7		123106975	LOC123106975	XP_044384958.1	small polypeptide DEVIL 8-like			BRADI_2g34000v3	hypothetical protein		Os05g0179100		DVL family protein		AT4G13395	DVL10	DVL10 [Source:UniProtKB/TrEMBL;Acc:Q6IM91]		1	turquoise			0.00187882	0.00197392	-0.00519558						0.87	1.02333	1.81333	0.386667	1.95667	3.47333	0.486667	0	0.373013	-1.27938	1.90555	-1.41945	-0.701947	4.51081	0.950442
TraesCS1A03G0294200	TraesCS1A02G119600	TraesCS1A01G119600	TRIAE_CS42_1AS_TGACv1_019780_AA0071390	Traes_1AS_93074CFEA		123040757	LOC123040757	XP_044319458.1	leucine-rich repeat extensin-like protein 4			BRADI_2g33930v3	hypothetical protein		Os05g0180300		Leucine-rich repeat, plant specific containing protein						13	salmon			0.00282924	0.00147891	-0.0145959						7.14333	3.55	26.48	21.7367	5.32667	13.6067	21.0367	5.22333	-1.15501	-0.55466	1.8997	-2.58289	2.43106	2.26618	1.83071
TraesCS1A03G0294700	TraesCS1A02G119800	TraesCS1A01G119800	TRIAE_CS42_1AS_TGACv1_021173_AA0081210	Traes_1AS_514A12B5B	TaAffx.59512.1.S1_at	123040780	LOC123040780	XP_044319473.1	FCS-Like Zinc finger 10-like isoform X1			BRADI_2g33900v3	hypothetical protein		Os05g0180500		Hypothetical conserved gene						20	royalblue			0.00596252	-0.0195727	-0.00302836						16.7167	11.4267	8.52667	1.27	3.75667	0.276667	2.11667	0.57	-0.5881	-2.56314	-3.51388	-2.6497	-2.85709	-0.164765	-0.882047
TraesCS1A03G0300100	TraesCS1A02G121800	TraesCS1A01G121800			Ta.7143.1.S1_x_at																		37	skyblue3			0.00103008	-0.0074377	0.0159527						33.2733	7.21667	37.3467	5.73667	40.0267	10.2667	1.87667	41.6567	-2.41295	-2.63048	-1.87518	3.92485	-0.13846	-1.35169	0.0790745
TraesCS1A03G0301300	TraesCS1A02G122300	TraesCS1A01G122300	TRIAE_CS42_1AS_TGACv1_020602_AA0078660	Traes_1AS_1BCCE78E0		123041050	LOC123041050	XP_044319685.1	pseudo histidine-containing phosphotransfer protein 2			BRADI_2g33460v3	hypothetical protein		Os05g0186100	OsPHP2	Similar to Histidine-containing phosphotransfer protein 4						3	brown	14		-0.00398558	-0.0011717	0.0114546						3.69667	6.75	2.31333	2.48333	4.28	2.68667	1.55333	8.70333	1.42409	0.201588	1.19899	4.04792	-1.37452	-1.09686	-0.152017
TraesCS1A03G0302700	TraesCS1A02G122500	TraesCS1A01G122500	TRIAE_CS42_1AS_TGACv1_019501_AA0067410	Traes_1AS_A53D11A37		100137005	LOC100137005	XP_044319809.1	NADP-dependent malic enzyme, chloroplastic			BRADI_2g33450v3	hypothetical protein		Os05g0186300	OscytME2	Similar to NADP-malic enzyme						9	magenta			-0.00837446	-0.0059783	-0.00125712						27.37	23.7367	19.44	33.9233	11.1233	33.84	2.99333	37.42	-0.41661	0.762526	1.3462	3.13952	0.477474	0.275489	-0.701663
TraesCS1A03G0304000	TraesCS1A02G122800	TraesCS1A01G122800	TRIAE_CS42_1AS_TGACv1_020399_AA0077180		Ta.8871.1.A1_at	123041226	LOC123041226	XP_044319828.1	hexokinase-7-like			BRADI_2g33380v3	hypothetical protein		Os05g0187100	HXK7	Similar to Hexokinase						20	royalblue			0.00585123	-0.0122262	-0.00204259						12.3533	2.06667	2.08333	1.30667	2.79	0.2	1.27333	0.24	-2.83885	-1.40456	-4.06687	-2.49529	-1.10463	-0.423888	-2.53892
TraesCS1A03G0304900	TraesCS1A02G123100	TraesCS1A01G123100	TRIAE_CS42_1AS_TGACv1_019598_AA0068870		Ta.8953.1.S1_a_at							BRADI_2g33350v3	hypothetical protein		Os05g0188100		Conserved hypothetical protein						15	midnightblue	1		-0.00438683	0.00720214	-0.00271953				1		4.54667	3.54	4.92	9.02	2.4	15.5133	5.65667	10.8033	0.0311749	0.800891	3.03692	0.53392	0.987882	1.51748	0.218166
TraesCS1A03G0308100	TraesCS1A02G124100	TraesCS1A01G124100	TRIAE_CS42_1AS_TGACv1_020066_AA0074480	Traes_1AS_CCE6BC20C	TaAffx.121125.1.S1_at	123108484	LOC123108484	XP_044386229.1	PRA1 family protein F3-like			BRADI_2g33060v3	hypothetical protein		Os05g0200280		Similar to prenylated rab acceptor family protein						19	lightyellow	424		-0.00974411	-0.00266132	0.00156741						1.05333	4.05667	0.56	5.68333	0.433333	1.55333	0.386667	5.84667	1.57317	2.69455	1.56807	3.29795	0.279077	-1.54249	-0.842301
TraesCS1A03G0308600	TraesCS1A02G124200	TraesCS1A01G124200	TRIAE_CS42_1AS_TGACv1_019518_AA0067590	Traes_1AS_C70D49E2E	Ta.25629.1.S1_at	123041551	LOC123041551	XP_044320116.1	peroxidase 42-like isoform X2														8	pink	245		0.00683579	-0.00358635	0.00052207			A			4.86667	1.08	4.71667	1.38	3.56	1.16667	4.32	1.08333	-2.21013	-1.88407	-1.59932	-2.15393	0.303506	0.577579	-0.0225527
TraesCS1A03G0312400	TraesCS1A02G125700	TraesCS1A01G125700	TRIAE_CS42_1AS_TGACv1_020472_AA0077690	Traes_1AS_CE362714F1	Ta.6043.3.S1_a_at	123041880	LOC123041880	XP_044320368.1	NDR1/HIN1-like protein 13			BRADI_2g33100v3	hypothetical protein		Os05g0199100		Similar to NDR1/HIN1-Like protein 2						28	skyblue			-0.00124456	-0.00456853	-0.00579775						1.46	1.78667	3.89	1.41333	0.126667	1.18	0.956667	1.47667	0.4639	-2.15506	1.30167	0.345357	-0.944549	-0.175327	1.67441
TraesCS1A03G0313300	TraesCS1A02G126100	TraesCS1A01G126100	TRIAE_CS42_1AS_TGACv1_019138_AA0061500	Traes_1AS_E9D3DE49C		123041913	LOC123041913	XP_044320405.1	GDSL esterase/lipase At5g45910-like			BRADI_2g32520v3	hypothetical protein		Os05g0210100	OsGELP64	Lipase, GDSL domain containing protein						27	white			0.00698862	-0.00599956	-0.00169733						2.19667	0.66	4.87333	0.16	1.16667	0.153333	2.40333	0.296667	-1.88585	-4.06526	-2.83948	-3.13238	-1.07054	-0.782787	1.10888
TraesCS1A03G0325800	TraesCS1A02G129600	TraesCS1A01G129600	TRIAE_CS42_1AS_TGACv1_019191_AA0062660	Traes_1AS_143816DF1		123110707	LOC123110707	XP_044387255.1	bidirectional sugar transporter SWEET3a-like			BRADI_2g32230v3	hypothetical protein		Os05g0214300	OsSWEET3a	Similar to Bidirectional sugar transporter SWEET3a		AT5G53190	SWEET3	Bidirectional sugar transporter SWEET [Source:UniProtKB/TrEMBL;Acc:A0A178U9N2]		9	magenta			-0.0057025	-0.0017175	-0.00331323						5.63	4.06667	1.85667	4.63333	1.05	5.76	0.75	4.38667	-0.553016	0.908723	3.15323	2.19288	-0.172097	0.990626	-1.63384
TraesCS1A03G0334100	TraesCS1A02G131900	TraesCS1A01G131900	TRIAE_CS42_1AS_TGACv1_021050_AA0080820		TaAffx.5779.1.S1_at																		7	black	23		0.00799435	-0.00890166	-0.00540972			A			76.1033	39.84	82.6367	38.88	80.9433	17.75	53.8433	13.0533	-0.780959	-1.32184	-1.75521	-2.11092	-0.516549	0.607585	0.024335
TraesCS1A03G0342500	TraesCS1A02G133900	TraesCS1A01G133900	TRIAE_CS42_1AS_TGACv1_019222_AA0063480			123043047	LOC123043047	XP_044321338.1	protein trichome birefringence-like 26 isoform X2			BRADI_2g32220v3	hypothetical protein						AT4G01080	TBL26	Mannan O-acetyltransferase 4 [Source:UniProtKB/TrEMBL;Acc:A0A346P851]		27	white			0.0058031	-0.00230585	-0.00325327						2.18333	0.646667	4.35333	0.636667	1.45333	0.833333	2.81	0.516667	-1.94087	-2.37935	-1.02209	-2.40049	0.134628	0.621482	0.573107
TraesCS1A03G0343000	TraesCS1A02G134000	TraesCS1A01G134000	TRIAE_CS42_1AS_TGACv1_019401_AA0066160	Traes_1AS_7CB2CE2FF								BRADI_2g31900v3	hypothetical protein		Os05g0223000	OsCML18	Similar to TCH2 (TOUCH 2); calcium ion binding		AT1G18210	CML27	Probable calcium-binding protein CML27 [Source:UniProtKB/Swiss-Prot;Acc:Q9LE22]		24	darkgrey			0.00354559	-0.00513066	0.00264777						34.27	13.4167	49.31	9.48333	15.09	14.2333	17.3067	22.5633	-1.45788	-2.75721	0.15149	-0.0497587	-0.855421	0.0085122	0.443905
TraesCS1A03G0359500	TraesCS1A02G136800	TraesCS1A01G136800	TRIAE_CS42_1AL_TGACv1_001681_AA0033990	Traes_1AL_B3C4E79BC	TaAffx.105348.1.S1_at	123043525	LOC123043525	XP_044321944.1	ribosomal RNA small subunit methyltransferase I-like isoform X1			BRADI_3g26680v3	hypothetical protein		Os10g0414500		Similar to Tetrapyrrole methylase family protein		AT1G45110		At1g45110 [Source:UniProtKB/TrEMBL;Acc:Q6NQA0]		8	pink	129		0.00562188	-0.00130286	-0.00106042						6.56667	2.74667	7.94333	2.86667	6.66667	3.49333	6.25	2.33	-1.43385	-1.81706	-0.984115	-2.27069	-0.206308	1.06752	0.176902
TraesCS1A03G0378500	TraesCS1A02G141400	TraesCS1A01G141400	TRIAE_CS42_1AL_TGACv1_000364_AA0010270	Traes_1AL_E122A50BF		123044273	LOC123044273	XP_044322920.1	ABC transporter G family member 25-like isoform X2			BRADI_3g27647v3	hypothetical protein		Os10g0442900	ABCG25	ABC transporter, White-brown complex homolog protein, Silicon-promoted formation of Casparian bands in the exodermi						5	green	38		-0.00663357	-0.00323058	0.00223545						1.70333	7.49667	1.23667	6.63667	2.28667	2.42	1.93	5.48	2.0445	2.22119	-0.168757	0.882156	-0.0274995	-0.699101	-0.204188
TraesCS1A03G0380800	TraesCS1A02G142000	TraesCS1A01G142000	TRIAE_CS42_1AL_TGACv1_004439_AA0053530		Ta.20786.2.A1_at	123044329	LOC123044329	XP_044322972.1	rubisco accumulation factor 1, chloroplastic-like			BRADI_3g27730v3	hypothetical protein		Os10g0445600		Conserved hypothetical protein						22	darkgreen			0.00220337	0.00685756	-0.00897035						4.98333	5.8	13.3667	7.24333	5.08333	17.5167	16.3367	5.00667	0.00341048	-1.25542	2.16783	-2.27764	0.227898	2.69761	1.48673
TraesCS1A03G0381900	TraesCS1A02G142400	TraesCS1A01G142400	TRIAE_CS42_1AL_TGACv1_003662_AA0050940	Traes_1AL_BE4FF7D92	Ta.21321.1.S1_at	123044359	LOC123044359	XP_044323022.1	silicon efflux transporter LSI2-like			BRADI_3g27800v3	hypothetical protein		Os10g0447900	SIET5	Similar to Citrate transporter family protein		AT1G02260		At1g02260 [Source:UniProtKB/TrEMBL;Acc:O81915]		10	purple	95		-0.0122069	-0.0042568	0.000625569						4.75	55.0633	12.1333	28.18	2.72	13.2	10.09	46.8867	3.46543	0.988444	2.10428	1.67196	-1.14422	-1.46711	1.33277
TraesCS1A03G0385200	TraesCS1A02G143300	TraesCS1A01G143300	TRIAE_CS42_1AL_TGACv1_000412_AA0011510	Traes_1AL_4820D80E2	Ta.2460.3.S1_x_at	123044691	LOC123044691	XP_044323455.1	E3 ubiquitin-protein ligase RZFP34-like			BRADI_3g27900v3	hypothetical protein		Os10g0456800	DCA1	CHY zinc finger protein, Transcriptional co-activator of DST (Drought and Salt Tolerance: zinc finger transcription factor gene), Drought and salt tolerance, Stomatal aperture contro		AT5G22920	RZPF34	E3 ubiquitin-protein ligase RZFP34 [Source:UniProtKB/Swiss-Prot;Acc:Q9FFB6]		30	steelblue			0.0046645	-0.00684971	0.015389						32.2733	15.07	5.96333	2.59667	29.1033	5.09333	7.25333	10.1267	-1.3362	-0.8936	-2.89089	-0.0914398	-2.42192	-0.874145	-2.86452
TraesCS1A03G0387100	TraesCS1A02G143900	TraesCS1A01G143900	TRIAE_CS42_1AL_TGACv1_001320_AA0028620	Traes_1AL_BEE495457	Ta.17133.1.S1_at	123044742	LOC123044742	XP_044323522.1	3-ketoacyl-CoA thiolase 2, peroxisomal-like			BRADI_3g27960v3	hypothetical protein		Os10g0457600		Similar to Acetyl-CoA C-acyltransferase (3-ketoacyl-coa thiolase b) (EC 2.3.1.16) (Fragment)						12	tan	412		-0.0146903	-0.00684014	-0.0010538						2.14667	17.21	2.42333	19.4667	0.963333	3.80333	0.666667	16.7333	2.91843	2.39341	1.59814	3.70159	-0.143538	-1.82009	0.381478
TraesCS1A03G0390800	TraesCS1A02G144800	TraesCS1A01G144800	TRIAE_CS42_1AL_TGACv1_001021_AA0023600	Traes_1AL_31EE3550E		123044820	LOC123044820	XP_044323634.1	uncharacterized protein LOC123044820			BRADI_3g28060v3	Plastid transcriptionally active 3 [Source:Projected from Arabidopsis thaliana (AT3G04260) UniProtKB/TrEMBL;Acc:F4J3M2]		Os10g0462800	WSL3	Component of the plastid-encoded plastid RNA polymerase (PEP), peripheral subunit of PEP complex, OsPAP1/OspTAC3, Early chloroplast developmen		AT3G04260	PTAC3	Plastid transcriptionally active 3 [Source:UniProtKB/TrEMBL;Acc:F4J3M2]		28	skyblue			0.00323826	-0.00107434	-0.0108116						1.65	0.253333	6.07333	1.31	0.426667	1.73333	1.44	0.55	-2.33514	-2.67445	1.8259	-2.19321	1.7516	2.36683	2.09091
TraesCS1A03G0391400	TraesCS1A02G145000	TraesCS1A01G145000	TRIAE_CS42_1AL_TGACv1_004495_AA0053690	Traes_1AL_53F3380AF	Ta.7715.1.S1_at	123044829	LOC123044829	XP_044323640.1	chaperonin CPN60-1, mitochondrial-like			BRADI_3g28070v3	hypothetical protein		Os10g0462900		Similar to mitochondrial chaperonin-60		AT3G23990	CPN60	Chaperonin CPN60, mitochondrial [Source:UniProtKB/Swiss-Prot;Acc:P29197]		18	lightgreen			-0.00493473	-0.000450097	-0.0104792						1.42333	3.84667	4.07	5.84667	0.496667	4.01667	1.82667	2.75667	1.26877	0.379367	2.81637	0.274788	0.577549	1.04352	1.46695
TraesCS1A03G0392700	TraesCS1A02G145600	TraesCS1A01G145600				123180832	LOC123180832	XP_044448944.1	uncharacterized protein LOC123180832														29	saddlebrown			-0.00303249	0.00160273	-0.007158						0	0.0766667	0	2.34	0	0.606667	0	0.156667	4.94576	6.67499	3.52516	3.23948	1.69349	2.02356	0
TraesCS1A03G0393100	TraesCS1A02G145800	TraesCS1A01G145800	TRIAE_CS42_1AL_TGACv1_003485_AA0050010	Traes_1AL_55440EF31	TaAffx.80336.2.S1_x_at	123044889	LOC123044889	XP_044323706.1	uncharacterized protein LOC123044889			BRADI_3g28120v3	hypothetical protein		Os10g0463800	FLO7	Domain of unknown function, DUF1338, containing green-plant-unique protein, Regulation of starch synthesis and amyloplast development, Peripheral endosperm developmen		AT1G07040		At1g07040 [Source:UniProtKB/TrEMBL;Acc:Q9LMJ7]		19	lightyellow	598		-0.0134835	-0.00335867	0.00024109						4.07667	18.95	2.89	13.8267	1.08333	8.34	1.44	21.13	1.85142	2.02006	3.27932	3.2854	-0.648165	-0.769431	-0.816807
TraesCS1A03G0393400	TraesCS1A02G146000	TraesCS1A01G146000	TRIAE_CS42_1AL_TGACv1_000872_AA0020740	Traes_1AL_C1F546A56		123115109	LOC123115109	XP_044392374.1	hypersensitive-induced response protein 1-like isoform X2						Os10g0464000		Similar to Hypersensitive-induced response protein						17	grey60			-0.00363219	-0.00450271	-0.00239002						0.0533333	2.28333	0.0866667	0.773333	0.04	0.0266667	0	0.24	6.21781	2.54481	1.41785	3.52192	-2.38331	-1.50679	1.28969
TraesCS1A03G0395900	TraesCS1A02G146900	TraesCS1A01G146900	TRIAE_CS42_U_TGACv1_641554_AA2097880	Traes_1AL_C4C5018EC	TaAffx.25642.1.S1_at							BRADI_3g28200v3	WD repeat-containing protein WDS homolog [Source:Projected from Arabidopsis thaliana (AT5G43920) UniProtKB/Swiss-Prot;Acc:Q9FND4]										30	steelblue			0.00354132	-0.00622969	0.0065723						17.3733	9.95333	7.23667	6.42667	17.9967	3.98667	8.72333	7.14	-0.937079	-0.45584	-2.10634	-0.654854	-0.860274	-0.390764	-1.34151
TraesCS1A03G0400700	TraesCS1A02G148400	TraesCS1A01G148400	TRIAE_CS42_1AL_TGACv1_004424_AA0053450	Traes_1AL_D20D648FD	Ta.14635.1.S1_a_at	123045041	LOC123045041	XP_044323895.1	60S ribosomal protein L23			BRADI_3g55140v3	hypothetical protein		Os10g0466700		Similar to 60S ribosomal protein L17		AT3G04400	RPL23A	60S ribosomal protein L23 [Source:UniProtKB/Swiss-Prot;Acc:P49690]		1	turquoise			0.000243135	0.00474945	-0.00167897						31.49	24.6433	39.5867	29.82	24.0933	59.9967	42.31	37.2133	-0.612711	-0.692834	2.01543	-0.578392	0.249238	1.55838	0.329362
TraesCS1A03G0402900	TraesCS1A02G149700	TraesCS1A01G149700	TRIAE_CS42_1AL_TGACv1_002192_AA0039630		TaAffx.114009.1.S1_at	123045082	LOC123045082	XP_044323952.1	probable leucine-rich repeat receptor-like protein kinase At1g35710			BRADI_3g28380v3	hypothetical protein		Os10g0468500		Serine/threonine protein kinase-related domain containing protein						39	orangered4	183		-0.00573955	8.48613e-05	-0.00367048						0.246667	1.29333	0.496667	2.22333	0.18	1.33	0.05	1.35333	1.7395	2.11564	2.883	4.07392	0.582147	0.41521	0.206008
TraesCS1A03G0403100	TraesCS1A02G149800	TraesCS1A01G149800	TRIAE_CS42_1AL_TGACv1_000265_AA0007680	Traes_1AL_368140493	TaAffx.99246.1.S1_at	123045092	LOC123045092	XP_044323963.1	acyltransferase-like protein At1g54570, chloroplastic			BRADI_2g12850v3	hypothetical protein		Os01g0362100		Esterase/lipase/thioesterase domain containing protein		AT1G54570		Acyltransferase-like protein At1g54570, chloroplastic [Source:UniProtKB/Swiss-Prot;Acc:Q9ZVN2]		39	orangered4	39		-0.0137335	-0.00234604	-0.00795903						4.44333	31.9167	10.6833	60.0433	3.47667	25.82	4.78333	30.9	2.58966	2.21371	2.48149	2.05098	0.759658	-0.0944275	1.13561
TraesCS1A03G0403400	TraesCS1A02G150100	TraesCS1A01G150100	TRIAE_CS42_1AL_TGACv1_000265_AA0007720	Traes_1AL_EEF9D88DA	Ta.4479.2.S1_a_at	123045108	LOC123045108	XP_044323986.1	receptor-like protein EIX2			BRADI_3g28390v3	hypothetical protein		Os10g0469700		Leucine-rich repeat, typical subtype containing protein						41	lightsteelblue1			-0.00994571	-0.0177578	0.0078265						54.6567	70.8367	44.8667	36.4233	20.17	18.6667	1.63333	98.3833	0.259122	-0.539945	-0.362499	5.49632	-1.1558	-2.18601	-0.356736
TraesCS1A03G0403500	TraesCS1A02G150200	TraesCS1A01G150200	TRIAE_CS42_1AL_TGACv1_001341_AA0029020	Traes_1AL_830763C49	TaAffx.134059.1.S1_at	123045113	LOC123045113	XP_044323996.1	protein NRT1/ PTR FAMILY 5.2-like			BRADI_3g28400v3	hypothetical protein		Os10g0469900		TGF-beta receptor, type I/II extracellular region family protein						3	brown	388		-0.00753857	-0.00779617	0.0105711						5.1	18.9667	5.61333	7.31667	3.22	3.35333	3.67333	24.8267	1.73679	0.16525	-0.142099	2.33846	-1.53171	-2.71617	0.0398319
TraesCS1A03G0404300	TraesCS1A02G150400	TraesCS1A01G150400	TRIAE_CS42_1AL_TGACv1_000124_AA0004070	Traes_1AL_3996E29ED	Ta.8453.1.S1_at	123045122	LOC123045122	XP_044324004.1	protein NRT1/ PTR FAMILY 5.2-like			BRADI_3g28410v3	hypothetical protein		Os10g0470700	OsPTR3	Similar to Peptide transporter		AT5G46050	NPF5.2	Protein NRT1/ PTR FAMILY 5.2 [Source:UniProtKB/Swiss-Prot;Acc:Q9FNL7]		6	red	55		-0.00926593	-0.0101262	0.00706515						7.36667	22.26	4.44333	7.16333	2.1	3.96667	1.49	20.0733	1.40476	0.471426	0.525234	3.46837	-1.62835	-1.99738	-0.695015
TraesCS1A03G0405100	TraesCS1A02G150800	TraesCS1A01G150800	TRIAE_CS42_1AL_TGACv1_000860_AA0020540	Traes_1AL_B331E8B19		123045141	LOC123045141	XP_044324018.1	very-long-chain aldehyde decarbonylase GL1-5-like			BRADI_3g28450v3	hypothetical protein						AT1G02205	CER1	Fatty acid hydroxylase superfamily [Source:TAIR;Acc:AT1G02205]		11	greenyellow	180		-0.014678	0.0109188	-0.0124246						0.0633333	6.47333	0.14	9.28333	0.21	22.23	0.183333	3.42	6.84369	6.20718	6.45446	4.22596	0.378733	3.13759	1.01523
TraesCS1A03G0405200	TraesCS1A02G150900	TraesCS1A01G150900	TRIAE_CS42_1AL_TGACv1_000860_AA0020560	Traes_1AL_429AA3929	Ta.8290.1.S1_a_at	123045147	LOC123045147	XP_044324027.1	very-long-chain aldehyde decarbonylase GL1-5-like	CER1-1A		BRADI_3g28460v3	hypothetical protein		Os10g0471100	WDA1	Protein with high similarity to proteins involved in wax production, Cuticular wax biosynthesi						1	turquoise	848		-0.00947019	0.0121928	-0.00737232			B			0.11	1.84667	0.306667	3.56667	0.143333	13.0967	0.52	2.88667	3.28676	3.48859	5.91579	2.47527	0.850546	2.6692	0.64871
TraesCS1A03G0407200	TraesCS1A02G151500	TraesCS1A01G151500	TRIAE_CS42_1AL_TGACv1_000843_AA0020210	Traes_1AL_FE1097B22	Ta.5195.1.S1_at							BRADI_3g28520v3	hypothetical protein		Os01g0500900		Rossmann-like alpha/beta/alpha sandwich fold domain containing protein		AT3G02660	EMB2768	Tyrosine--tRNA ligase [Source:UniProtKB/TrEMBL;Acc:A0A178VAQ8]		27	white			0.00515428	-0.00191184	-0.00326913						3.83667	1.61333	6.91333	2.26	3.17	2.25667	5.56667	1.6	-1.44191	-1.88825	-0.523121	-2.44684	0.407402	1.06822	0.853743
TraesCS1A03G0407300	TraesCS1A02G151600	TraesCS1A01G151600	TRIAE_CS42_1AL_TGACv1_000843_AA0020200	Traes_1AL_324C5C146	Ta.1184.1.A1_at	123045220	LOC123045220	XP_044324120.1	uncharacterized protein LOC123045220														6	red	228		-0.00462261	-0.00184185	0.00497683						0.396667	2.01333	0.133333	1.00333	0.36	0.463333	0.42	2.09	2.01401	2.57911	0.121665	1.72168	-1.21638	-2.043	-1.78148
TraesCS1A03G0409800	TraesCS1A02G152600	TraesCS1A01G152600	TRIAE_CS42_1AL_TGACv1_000853_AA0020390	Traes_1AL_A785A010E	Ta.26907.1.S1_at	123117142	LOC123117142	XP_044393935.1	ribonuclease 1-like						Os09g0538000	OsRNS5	Ribonuclease T2 family protein						27	white			0.0302837	-0.013024	0.00774544						45.2133	0.486667	198.1	0.216667	65.68	0.0566667	76.1567	2.47	-6.66053	-8.53549	-10.5289	-5.73907	0.255888	-4.82275	2.13088
TraesCS1A03G0410200	TraesCS1A02G152800	TraesCS1A01G152800	TRIAE_CS42_1AL_TGACv1_000888_AA0021140	Traes_1AL_A48A8840C	Ta.10480.1.S1_a_at	542947	LOC542947	XP_044324408.1	ribonuclease 1						Os09g0537700	RNS4	S-like ribonuclease, Salinity tolerance, Abiotic stress response, Regulation of photomorphogenesi						28	skyblue			0.00374928	-0.0165416	-0.00476183						15.96	28.0233	47.05	1.20667	6.74	4.63667	1.75667	3.08667	0.709795	-5.8757	-0.577285	0.131472	-4.95781	0.800367	1.62769
TraesCS1A03G0411300	TraesCS1A02G153100	TraesCS1A01G153100	TRIAE_CS42_1AL_TGACv1_000111_AA0003680			123045454	LOC123045454	XP_044324445.1	long-chain-alcohol oxidase FAO2-like			BRADI_3g28677v3	hypothetical protein		Os10g0475100		Similar to oxidoreductase						2	blue	439		-0.00638603	-0.00136562	0.00883191						2.02	5.38667	1.97333	3.06667	1.63333	2.99	1.72667	10.51	1.23799	0.558539	0.882199	2.16825	-0.829118	-1.39346	-0.149671
TraesCS1A03G0419300	TraesCS1A02G156100	TraesCS1A01G156100	TRIAE_CS42_1AL_TGACv1_000076_AA0002640	Traes_1AL_DBFD7C798		123045860	LOC123045860	XP_044325021.1	probable cytokinin riboside 5'-monophosphate phosphoribohydrolase LOGL10			BRADI_3g28900v3	Similar to carboxy-lyase [Source: Projected from Oryza sativa (Os10g0479500)]		Os10g0479500	LOGL10	Similar to carboxy-lyase		AT2G37210		Cytokinin riboside 5'-monophosphate phosphoribohydrolase [Source:UniProtKB/TrEMBL;Acc:F4IQ18]		24	darkgrey			0.00977889	-0.00908707	-0.00147912						17.8567	3.81333	36.53	2.04	9.85667	3.73	7.16	2.93667	-2.47627	-4.13399	-1.61299	-1.56776	-0.722543	0.612027	0.935181
TraesCS1A03G0419600	TraesCS1A02G156400	TraesCS1A01G156400	TRIAE_CS42_1AL_TGACv1_001182_AA0026600	Traes_1AL_AB89C36F8	Ta.4366.1.A1_at	123045902	LOC123045902	XP_044325079.1	UDP-xylose transporter 1-like			BRADI_3g28920v3	hypothetical protein		Os10g0479700		Protein of unknown function DUF250 domain containing protein						2	blue	177		-0.00779667	-0.00133976	0.00588538						1.89333	4.09667	0.753333	2.66667	1.10333	2.81	0.3	6.49667	1.18654	1.72479	1.54369	4.18869	-1.07647	-0.833609	-1.61472
TraesCS1A03G0420300	TraesCS1A02G156500	TraesCS1A01G156500	TRIAE_CS42_1AL_TGACv1_000003_AA0000090	Traes_1AL_41FC93595	Ta.3973.2.S1_at	123045915	LOC123045915	XP_044325099.1	protein ENHANCED DISEASE RESISTANCE 2-like			BRADI_3g28937v3	hypothetical protein						AT2G28320		Pleckstrin homology (PH) and lipid-binding START domains-containing protein [Source:UniProtKB/TrEMBL;Acc:F4IHT0]		5	green	212		-0.00775374	-0.00692034	0.000538094						2.44333	9.53333	2.47	8.42667	1.8	2.49333	1.48	7.17667	2.02897	1.53619	0.460236	1.79279	-0.551196	-1.2065	-0.0584246
TraesCS1A03G0426600	TraesCS1A02G157900	TraesCS1A01G157900	TRIAE_CS42_1AL_TGACv1_003588_AA0050550			123046089	LOC123046089	XP_044325315.1	uncharacterized protein LOC123046089			BRADI_3g28990v3	hypothetical protein										24	darkgrey			0.00579039	-0.0103932	-0.00180456						13.5833	3.5	21.14	1.87667	4.32667	2.29	3.09667	3.16	-2.17941	-3.75883	-0.906186	-0.57305	-1.0534	0.0794103	0.526032
TraesCS1A03G0429400	TraesCS1A02G159200	TraesCS1A01G159200	TRIAE_CS42_1AL_TGACv1_003638_AA0050840	Traes_1AL_7F4B707C7		123046238	LOC123046238	XP_044325479.1	uncharacterized protein LOC123046238			BRADI_3g29080v3	hypothetical protein		Os10g0482900	OsGRL19	Thioredoxin fold domain containing protein		AT3G11920		F26K24.21 protein [Source:UniProtKB/TrEMBL;Acc:Q9SF07]		23	darkturquoise			-0.00143338	-0.00303208	0.00679251						2.14	1.12333	0.753333	1.84	1.98333	0.746667	0.48	2.48333	-1.1115	1.17276	-1.17161	2.19135	0.903169	-1.20633	-1.38109
TraesCS1A03G0432600	TraesCS1A02G160200	TraesCS1A01G160200	TRIAE_CS42_1AL_TGACv1_000260_AA0007590	Traes_1AL_60AFF4D47		123046356	LOC123046356	XP_044325642.1	probable N-succinyldiaminopimelate aminotransferase DapC			BRADI_3g29210v3	hypothetical protein		Os10g0484700		Pyridoxal phosphate-dependent transferase, major region, subdomain 1 domain containing protein						11	greenyellow			0.000695772	0.000525217	-0.00658784						2.91333	3.15667	2.51667	2.96667	2.72	4.05	2.46	1.05333	0.177692	-0.219208	0.422664	-1.58821	-0.421008	2.26271	-0.0241073
TraesCS1A03G0435600	TraesCS1A02G161200	TraesCS1A01G161200	TRIAE_CS42_1AL_TGACv1_000576_AA0014940	Traes_1AL_4BC2EC094	TaAffx.121392.1.S1_at	123046497	LOC123046497	XP_044325824.1	uncharacterized protein LOC123046497 isoform X2						Os10g0478500	Os2M1	MATH domain containing protein						35	sienna3	69		-0.0133706	0.00244048	-0.0100619						2.17667	33.32	5.05	23.5467	2.19	28.1367	3.06333	12.5367	3.53986	2.24148	3.44474	1.80839	-0.499384	1.42904	0.799
TraesCS1A03G0440600	TraesCS1A02G163000	TraesCS1A01G163000	TRIAE_CS42_1AL_TGACv1_001202_AA0026890			123120164	LOC123120164	XP_044396126.1	uncharacterized protein LOC123120164			BRADI_3g29430v3	hypothetical protein										24	darkgrey			0.00446295	-0.00571728	-0.00101486						2.10667	0.666667	4.57333	0.403333	1.03	0.386667	1.23667	0.68	-1.85673	-3.46496	-1.39469	-1.71896	-0.685693	-0.281393	0.922534
TraesCS1A03G0443400	TraesCS1A02G163700	TraesCS1A01G163700	TRIAE_CS42_1AL_TGACv1_000496_AA0013490	Traes_1AL_5450D9C86	TaAffx.38265.1.S1_at	123046771	LOC123046771	XP_044326136.1	uncharacterized protein LOC123046771			BRADI_2g32062v3	hypothetical protein										47	bisque4	34		-0.00734419	-0.00194148	-0.00494554						0.71	4.06333	1.26333	4.33	0.35	2.35667	0.643333	2.63	2.57742	1.65721	2.79185	1.80395	0.102552	0.741178	1.02276
TraesCS1A03G0450700	TraesCS1A02G166100	TraesCS1A01G166100	TRIAE_CS42_1AL_TGACv1_002075_AA0038500	Traes_1AL_723984393	Ta.192.1.S1_at																		19	lightyellow	730		-0.0211025	-0.00532271	-0.000941659						58.0133	356.573	51.5467	430.623	20.8833	160.033	10.4567	603.82	2.45849	2.78893	2.91354	5.22805	0.0969436	-1.33476	-0.233494
TraesCS1A03G0450800	TraesCS1A02G166200	TraesCS1A01G166200	TRIAE_CS42_1AL_TGACv1_002075_AA0038510	Traes_1AL_504484416	TaAffx.108363.1.S1_at	123120870	LOC123120870	XP_044396810.1	uncharacterized protein LOC123120870														19	lightyellow	766		-0.0181536	-0.00289848	0.00226462						4.13333	33.9133	3.38333	39.4933	3.22333	13.2567	0.843333	47.9067	2.8448	3.09034	2.6604	4.75418	0.0506682	-1.15921	-0.194879
TraesCS1A03G0451400	TraesCS1A02G166600	TraesCS1A01G166600	TRIAE_CS42_1AL_TGACv1_001362_AA0029390	Traes_1AL_82AAF3E95		542830	LOC542830	XP_044326480.1	uncharacterized protein LOC542830	WAS-2		BRADI_3g29710v3	hypothetical protein		Os10g0490900		Similar to Secretory protein		AT2G15220		At2g15220/F15A23.4 [Source:UniProtKB/TrEMBL;Acc:Q9SKL6]		16	lightcyan			-0.00546916	0.00164677	-0.00581582						1.72	2.86667	0.716667	1.98333	0.373333	4.37333	0.21	1.44667	0.787995	0.612894	3.89592	2.11556	-0.566763	1.96057	-0.391662
TraesCS1A03G0452400	TraesCS1A02G167100	TraesCS1A01G167100	TRIAE_CS42_1AL_TGACv1_000158_AA0005040	Traes_1AL_0A12DA18E	TaAffx.105935.1.S1_at	123047066	LOC123047066	XP_044326500.1	NDR1/HIN1-like protein 6			BRADI_3g29620v3	hypothetical protein										4	yellow			-0.00173237	-0.000942578	0.00488518						0.623333	0.306667	1.68333	0.703333	0.53	0.836667	0.446667	2.60333	-0.311714	-1.08095	1.051	2.98667	1.02148	-0.428608	1.79071
TraesCS1A03G0454100	TraesCS1A02G168100	TraesCS1A01G168100	TRIAE_CS42_1AL_TGACv1_001661_AA0033730	Traes_1AL_16EAFFACD		123047117	LOC123047117	XP_044326546.1	serine carboxypeptidase-like 51			BRADI_1g60600v3	hypothetical protein		Os03g0393700	OsSCP18	Similar to Serine carboxypeptidase family protein, expressed						12	tan	341		-0.00957405	-0.00104024	-0.00230179						6.70333	19.4767	5.94667	17.51	4.05667	14.7733	3.10667	18.0733	1.4704	1.37734	1.75012	2.13496	-0.333044	0.229515	-0.239983
TraesCS1A03G0454700	TraesCS1A02G168400	TraesCS1A01G168400	TRIAE_CS42_1AL_TGACv1_000871_AA0020720	Traes_1AL_2039E0912		123047158	LOC123047158	XP_044326589.1	uncharacterized protein LOC123047158			BRADI_3g30127v3	hypothetical protein		Os09g0531100		Conserved hypothetical protein		AT2G21385		Expressed protein [Source:UniProtKB/TrEMBL;Acc:Q94AU3]		32	violet	109		0.0126046	-0.00464881	0.000482472						11.08	3.01667	16.54	2.88333	18.53	2.14	17.9333	1.58333	-1.81496	-2.60425	-3.27571	-3.93696	-0.296959	0.69434	0.492329
TraesCS1A03G0455000	TraesCS1A02G168600	TraesCS1A01G168600	TRIAE_CS42_1AL_TGACv1_002163_AA0039290			123047176	LOC123047176	XP_044326607.1	calcium uniporter protein 3, mitochondrial-like			BRADI_3g30110v3	hypothetical protein		Os10g0501500		Protein of unknown function DUF607 family protein						9	magenta	99		-0.0116897	0.0065302	-0.000496552						2.2	7.49667	2.31333	16.8567	1.12333	14.95	3.45667	20.5267	2.15802	2.77377	3.5092	1.9088	1.06442	0.0859502	0.448672
TraesCS1A03G0459800	TraesCS1A02G170200	TraesCS1A01G170200	TRIAE_CS42_1AL_TGACv1_000410_AA0011460	Traes_1AL_5FD3B3577		123047349	LOC123047349	XP_044326816.1	multidrug resistance protein 2-like isoform X1										AT4G36790		Major facilitator superfamily protein [Source:UniProtKB/TrEMBL;Acc:O23203]		11	greenyellow			-0.00020711	0.00306758	-0.0131487						3.41	4.31667	8.66	9.07333	2.78333	8.85667	6.45	2.71667	0.321067	-0.340145	1.59898	-1.54548	0.697533	2.05803	1.35874
TraesCS1A03G0465400	TraesCS1A02G172800	TraesCS1A01G172800																					32	violet			0.00330829	-0.000483541	0.00933815						0.643333	0.57	4.48667	0	4.12	0.69	0.953333	2.35333	-0.677542	-2.05418	-1.16058	-1.29	-0.816882	0.523968	0.559755
TraesCS1A03G0465800	TraesCS1A02G173100	TraesCS1A01G173100	TRIAE_CS42_1AL_TGACv1_000432_AA0011950	Traes_1AL_5B26F6A14	Ta.3243.1.S1_at	123047740	LOC123047740	XP_044327177.1	glutamyl-tRNA reductase 1, chloroplastic-like	hemA1		BRADI_3g30160v3	hypothetical protein						AT1G58290	HEMA1	Glutamyl-tRNA reductase 1, chloroplastic [Source:UniProtKB/Swiss-Prot;Acc:P42804]		38	plum1			0.00194587	0.00501688	-0.0022532						54.53	120.51	69.61	76.0133	205.82	141.98	91.5167	42.0233	1.01118	-0.0576869	-0.730024	-1.58399	-0.83392	2.03362	0.234948
TraesCS1A03G0468700	TraesCS1A02G173800	TraesCS1A01G173800	TRIAE_CS42_1AL_TGACv1_000110_AA0003650		Ta.29307.1.A1_at	123048034	LOC123048034	XP_044327192.1	benzyl alcohol O-benzoyltransferase-like			BRADI_3g30220v3	hypothetical protein						AT5G17540		At5g17540 [Source:UniProtKB/TrEMBL;Acc:Q9LF70]		3	brown	404		-0.0112742	-0.0130242	0.0140668						6.35667	31.9933	6.32667	11.6233	4.34	2.89	1.54333	44.1867	1.99285	0.833699	-0.682559	4.37843	-1.50535	-3.39335	-0.346197
TraesCS1A03G0472600	TraesCS1A02G175200	TraesCS1A01G175200	TRIAE_CS42_1AL_TGACv1_000611_AA0015720	Traes_1AL_8FA3E9154	Ta.27482.1.S1_at	123048176	LOC123048176	XP_044327266.1	non-specific lipid-transfer protein 2P-like			BRADI_3g30300v3	hypothetical protein		Os10g0505700	OsLTP2.12	Similar to Nonspecific lipid-transfer protein 2 (nsLTP2) (7 kDa lipid transfer protein)						49	plum2	3		-0.00614833	0.00627645	-0.00126449						17.4167	37.82	28.3867	49.4433	15.4733	69.34	37.57	70.3433	1.01972	0.547706	2.26814	0.381596	0.183744	0.495026	0.65576
TraesCS1A03G0473200	TraesCS1A02G175500	TraesCS1A01G175500	TRIAE_CS42_1AL_TGACv1_000312_AA0008510			123048197	LOC123048197	XP_044327283.1	ice nucleation protein-like			BRADI_3g30320v3	hypothetical protein										9	magenta	52		-0.0158426	2.37342e-05	0.00543075						9.61667	32.8933	0.666667	20.2033	4.13667	26.95	1.19333	30.79	1.60394	4.66283	2.47817	4.26255	-0.920201	0.135508	-3.97909
TraesCS1A03G0477600	TraesCS1A02G176800	TraesCS1A01G176800			TaAffx.622.1.S1_at	123183787	LOC123183787	XP_044452223.1	uncharacterized protein LOC123183787			BRADI_3g30470v3	hypothetical protein		Os10g0516400		Conserved hypothetical protein		AT1G64980		Nucleotide-diphospho-sugar transferases superfamily protein [Source:TAIR;Acc:AT1G64980]		16	lightcyan	1		-0.00356396	0.00580399	-0.000730773						0.55	1.03667	0.936667	3.16667	0.83	2.75	2.01	3.05	1.10133	0.805597	2.24672	-0.158327	1.13999	0.736439	1.43573
TraesCS1A03G0477800	TraesCS1A02G176900	TraesCS1A01G176900	TRIAE_CS42_1AL_TGACv1_000234_AA0006830	Traes_1AL_A19D9321E	TaAffx.31629.1.S1_at	123048404	LOC123048404	XP_044327452.1	electron transfer flavoprotein-ubiquinone oxidoreductase, mitochondrial-like isoform X2			BRADI_3g30480v3	Electron transfer flavoprotein-ubiquinone oxidoreductase, mitochondrial [Source:Projected from Arabidopsis thaliana (AT2G43400) UniProtKB/Swiss-Prot;Acc:O22854]		Os10g0516300		Similar to ETFQO (electron-transfer flavoprotein:ubiquinone oxidoreductase); catalytic/ electron carrier/ electron-transferring-flavoprotein dehydrogenase		AT2G43400	ETFQO	Electron transfer flavoprotein-ubiquinone oxidoreductase, mitochondrial [Source:UniProtKB/Swiss-Prot;Acc:O22854]		30	steelblue			0.00660205	-0.00503864	0.005402						8.01	2.24333	2.21	0.776667	6.15667	1.12	2.71333	0.953333	-1.92202	-1.12205	-2.59438	-2.12066	-1.11343	0.73432	-1.91341
TraesCS1A03G0478900	TraesCS1A02G177300	TraesCS1A01G177300	TRIAE_CS42_1AL_TGACv1_003747_AA0051340	Traes_1AL_3A1D8DC66	Ta.8564.1.S1_x_at	123048452	LOC123048452	XP_044327491.1	cytochrome P450 89A2-like														12	tan	101		-0.00802402	-0.00253922	-0.00140105						15.1433	34.2867	23.1667	42.9333	13.83	26.1667	6.97333	43.0933	1.0648	0.6381	0.901456	2.22604	0.138333	-0.177927	0.565034
TraesCS1A03G0479500	TraesCS1A02G177500	TraesCS1A01G177500	TRIAE_CS42_1AL_TGACv1_000461_AA0012610	Traes_1AL_0912DED70	Ta.9143.1.S1_at	123048490	LOC123048490	XP_044327518.1	aquaporin NIP3-1-like			BRADI_3g30540v3	At4g10380 [Source:Projected from Arabidopsis thaliana (AT4G10380) UniProtKB/TrEMBL;Acc:A3KPG0]		Os10g0513200	NIP3	Boric acid channel, Regulation of boron distributio		AT4G10380	NIP5-1	At4g10380 [Source:UniProtKB/TrEMBL;Acc:A3KPG0]		8	pink	332		0.0118898	-0.00358234	0.00307892			A			4.08	0	3.30333	0.0333333	3.75667	0.02	4.48667	0.08	-7.65329	-6.41053	-8.4526	-6.01653	0.829198	-2.64325	-0.413526
TraesCS1A03G0480800	TraesCS1A02G177800	TraesCS1A01G177800	TRIAE_CS42_1AL_TGACv1_002270_AA0040290	Traes_1DL_A043D4B31	Ta.11147.1.A1_at	123048551	LOC123048551	XP_044327571.1	cytochrome P450 84A1-like			BRADI_3g30590v3	hypothetical protein		Os10g0512400	CYP84A5	Coniferaldehyde 5-hydroxylase, Lignin biosynthesi		AT4G36220	CYP84A1	Cytochrome P450 84A1 [Source:UniProtKB/Swiss-Prot;Acc:Q42600]		39	orangered4	120		-0.00891202	0.00147622	-0.00305536						2.48333	7.94333	2.55333	13.1233	1.35	7.62	3.48667	10.14	1.51543	2.04236	2.1463	0.970097	0.603949	0.0953411	0.0770218
TraesCS1A03G0481600	TraesCS1A02G178100	TraesCS1A01G178100			TaAffx.110365.1.S1_at							BRADI_3g30620v3	hypothetical protein										40	mediumpurple3	21		-0.00810925	-0.00147347	-0.00356872						0.363333	2.88333	0.76	5.63333	0.486667	1.81	0.373333	2.86333	3.05105	2.63183	2.34359	3.10666	0.613677	-0.528479	1.0329
TraesCS1A03G0484600	TraesCS1A02G179400	TraesCS1A01G179400	TRIAE_CS42_1AL_TGACv1_001965_AA0037320	Traes_1AL_04C9CFE29		123048673	LOC123048673	XP_044327660.1	protein RESPONSE TO LOW SULFUR 2-like			BRADI_3g30730v3	hypothetical protein		Os10g0509600		Conserved hypothetical protein						25	orange			0.0090161	-0.00315541	0.00591715						17.0233	2.25	6.90667	5.56667	39.1633	2.63	6.23667	3.14333	-2.99542	-0.595006	-4.13039	-1.40563	0.998033	-0.00145647	-1.40238
TraesCS1A03G0485900	TraesCS1A02G180000	TraesCS1A01G180000	TRIAE_CS42_1AL_TGACv1_001376_AA0029540			123048741	LOC123048741	XP_044327722.1	21 kDa protein-like			BRADI_3g30770v3	hypothetical protein		Os10g0508700		Pectinesterase inhibitor domain containing protein						45	darkorange2			0.00490909	0.00620023	-0.00262143						3.72667	1.35	3.27667	3.16	4.17667	4.86667	9.22667	1.92667	-1.44185	-0.121147	0.497853	-2.07665	1.47564	1.61513	0.154944
TraesCS1A03G0487700	TraesCS1A02G181000	TraesCS1A01G181000			Ta.23112.1.S1_x_at	123048811	LOC123048811	XP_044327779.1	methionine gamma-lyase-like			BRADI_3g30860v3	Methionine gamma-lyase [Source:Projected from Arabidopsis thaliana (AT1G64660) UniProtKB/Swiss-Prot;Acc:Q9SGU9]		Os10g0517500	RRJ1	Cys/Met metabolism, pyridoxal phosphate-dependent enzyme domain containing protein		AT1G64660	MGL	Methionine gamma-lyase [Source:UniProtKB/Swiss-Prot;Acc:Q9SGU9]		36	yellowgreen			-0.00847914	-0.00485289	-0.00784129						0.71	9.26333	1.72333	7	0.706667	2.21	0.713333	2.49	3.21539	1.7591	1.72554	1.34081	-0.646734	0.0203711	0.809562
TraesCS1A03G0489000	TraesCS1A02G181600	TraesCS1A01G181600				123048854	LOC123048854	XP_044327816.1	protein HLB1-like			BRADI_3g31090v3	hypothetical protein		Os10g0518300		Tetratricopeptide-like helical domain containing protein		AT5G41950	HLB1	Protein HLB1 [Source:UniProtKB/Swiss-Prot;Acc:Q9FHY8]		19	lightyellow	481		-0.0142568	-0.000976773	-8.5143e-05						1.74333	10.9467	1	8.79	0.423333	6.13667	0.366667	12.2	2.65457	2.9931	3.23704	4.3409	-0.336254	-0.585908	-0.674785
TraesCS1A03G0491400	TraesCS1A02G182600	TraesCS1A01G182600	TRIAE_CS42_1AL_TGACv1_000504_AA0013540			123123986	LOC123123986	XP_044400636.1	uncharacterized protein LOC123123986			BRADI_3g31350v3	hypothetical protein		Os10g0520100	OsFbox559	Cyclin-like F-box domain containing protein						2	blue	14		-0.00654592	-8.91328e-05	0.00718937						1.73	2.79	5.77667	4.66	2.66	4.15667	0.766667	15.9767	0.382991	-0.641896	0.88389	3.9651	0.358007	-1.32404	1.38289
TraesCS1A03G0501800	TraesCS1A02G186300	TraesCS1A01G186300	TRIAE_CS42_1AL_TGACv1_000725_AA0017980	Traes_1AL_8955C1103	TaAffx.108243.1.S1_at	123049437	LOC123049437	XP_044328292.1	probable glutathione S-transferase GSTU6			BRADI_3g31860v3	hypothetical protein										34	darkmagenta	7		-0.0112455	0.00137071	0.0033128						0.93	5.02667	1.27333	4.28333	0.616667	4.81667	0.27	10.0267	1.89909	1.87437	2.729	4.62814	-0.057296	-0.405881	-0.0325767
TraesCS1A03G0501900	TraesCS1A02G186400	TraesCS1A01G186400	TRIAE_CS42_1AL_TGACv1_000725_AA0017970	Traes_1AL_C40703A29		123049427	LOC123049427	XP_044328284.1	probable glutathione S-transferase GSTU6			BRADI_3g31841v3	hypothetical protein										29	saddlebrown			-0.00622705	-0.00275221	-0.0129376						2	2.96	2.05667	7.93	0.266667	3.36	0.78	1.69	-0.0849788	1.04223	2.54313	0.637016	1.08626	1.39179	-0.0409469
TraesCS1A03G0502000	TraesCS1A02G186500	TraesCS1A01G186500	TRIAE_CS42_1AL_TGACv1_000725_AA0017960	Traes_1AL_1A9EB2CBB		123049416	LOC123049416	XP_044328274.1	probable glutathione S-transferase GSTU6			BRADI_3g31820v3	hypothetical protein		Os10g0529400	OsGSTU9	Similar to Glutathione S-transferase GSTU6						9	magenta			-0.00630141	-0.000253396	-0.00223973						9.08667	8.36667	6.91667	12.3033	4.96667	14.2567	1.87	12.88	-0.114707	0.440685	1.48401	2.47851	0.20257	0.813034	-0.352822
TraesCS1A03G0502600	TraesCS1A02G186700	TraesCS1A01G186700	TRIAE_CS42_1AL_TGACv1_001900_AA0036430	Traes_1AL_C64C85707		123049460	LOC123049460	XP_044328309.1	probable glutathione S-transferase GSTU6			BRADI_3g31727v3	hypothetical protein		Os10g0527800	OsGSTU12	Similar to Tau class GST protein 3						5	green	800		-0.0208912	-0.0129168	0.00193783						6.90667	84.08	6.79	67.56	1.10333	6.81667	2.06667	97.1233	3.46292	3.06657	2.39853	5.27363	-0.565842	-3.30658	-0.169502
TraesCS1A03G0502800	TraesCS1A02G186800	TraesCS1A01G186800	TRIAE_CS42_1AL_TGACv1_003384_AA0049460	Traes_1AL_CA2AFD745		123125737	LOC123125737	XP_044402165.1	probable glutathione S-transferase GSTU6														2	blue	174		-0.00706282	-0.00212471	0.0108202						14.15	16.1233	4	14.9533	10.61	10.2133	4.16	33.4867	0.0577748	1.57668	-0.0503983	2.4717	-0.291863	-1.04295	-1.81077
TraesCS1A03G0505500	TraesCS1A02G188500	TraesCS1A01G188500	TRIAE_CS42_1AL_TGACv1_001382_AA0029710		Ta.13857.1.S1_at							BRADI_3g31550v3	hypothetical protein		Os10g0522601		Armadillo-like helical domain containing protein		AT2G45720		ARM repeat superfamily protein [Source:UniProtKB/TrEMBL;Acc:O64651]		28	skyblue			0.00113922	-0.00284169	0.00271349						1.40333	1.26333	4.15667	0.913333	0.933333	0.85	2.16333	2.72333	-0.41611	-2.31724	0.0344603	-0.283374	-0.646878	-0.900841	1.25425
TraesCS1A03G0505800	TraesCS1A02G188700	TraesCS1A01G188700	TRIAE_CS42_1AL_TGACv1_000049_AA0001280	Traes_1AL_3E9ACF47D	Ta.14513.1.S1_at	123049631	LOC123049631	XP_044328469.1	F-box protein PP2-A13-like			BRADI_3g31520v3	hypothetical protein		Os03g0116700	OsFbox127	Cyclin-like F-box domain containing protein		AT3G61060	AtPP2-A13	Phloem protein 2-A13 [Source:UniProtKB/TrEMBL;Acc:F4JD33]		30	steelblue			0.00642483	-0.00523855	0.00633716						73.06	10.0433	31.2867	4.48333	38.3	19.0767	5.95	12.49	-2.92016	-2.74164	-1.0323	0.699438	-1.15418	0.999728	-1.33271
TraesCS1A03G0507800	TraesCS1A02G189300	TraesCS1A01G189300	TRIAE_CS42_1AL_TGACv1_004153_AA0052620		Ta.29563.1.S1_at	123126800	LOC123126800	XP_044402673.1	uncharacterized protein LOC123126800			BRADI_3g31440v3	hypothetical protein		Os10g0521400		Alpha/beta hydrolase fold-1 domain containing protein						1	turquoise	725		-0.00322369	0.00561088	-0.00297532			B			0.256667	0.386667	0.23	0.73	0.04	2.49	0.21	0.72	1.15333	1.36356	5.22955	1.24666	0.481817	2.41237	0.271588
TraesCS1A03G0509500	TraesCS1A02G190000	TraesCS1A01G190000	TRIAE_CS42_1AL_TGACv1_001811_AA0035470	Traes_1AL_B01211A03		123049799	LOC123049799	XP_044328610.1	DAR GTPase 2, mitochondrial-like			BRADI_3g33967v3	DAR GTPase 2, mitochondrial [Source:Projected from Arabidopsis thaliana (AT4G10650) UniProtKB/Swiss-Prot;Acc:O82497]		Os10g0572000		GTP-binding protein, HSR1-related domain containing protein						40	mediumpurple3			-0.0040165	-0.0025272	-0.00421464						1.85667	3.69333	2.25	5.77333	1.72333	2.17667	1.36333	2.81333	1.78944	1.47278	2.75353	2.18636	0.235606	0.156603	0.552263
TraesCS1A03G0510000	TraesCS1A02G190100	TraesCS1A01G190100	TRIAE_CS42_1AL_TGACv1_000555_AA0014640	Traes_1AL_D6C49C3BC	TaAffx.122294.1.S1_at	123049852	LOC123049852	XP_044328656.1	NAC domain-containing protein 86-like			BRADI_3g33957v3	hypothetical protein		Os10g0571600	ONAC121	No apical meristem (NAM) protein domain containing protein		AT4G17980	anac071	NAC domain containing protein 71 [Source:TAIR;Acc:AT4G17980]		47	bisque4	29		-0.0138564	-0.00305998	-0.00435255						0.236667	10.1	0.796667	11.02	0.106667	2.50333	0.513333	6.37	4.85994	3.81337	3.80906	3.38832	0.0824191	-1.05271	1.12899
TraesCS1A03G0511000	TraesCS1A02G190500	TraesCS1A01G190500	TRIAE_CS42_1AL_TGACv1_000758_AA0018550	Traes_1AL_D10D533C3		123049952	LOC123049952	XP_044328743.1	plant intracellular Ras-group-related LRR protein 5-like			BRADI_3g33990v3	hypothetical protein		Os10g0572300	OsIRL5	Leucine-rich repeat, typical subtype containing protein						6	red	508		-0.00570696	-0.00666887	0.00726295						2.22667	5.21	1.43	3.28	1.3	1.06	1.03	6.20667	1.27757	1.02401	-0.531395	2.15702	-0.90384	-2.16715	-0.650284
TraesCS1A03G0514200	TraesCS1A02G191700	TraesCS1A01G191700	TRIAE_CS42_1AL_TGACv1_000462_AA0012630	Traes_1AL_5A4E3C4FC		123050078	LOC123050078	XP_044328861.1	abscisic acid receptor PYL10-like			BRADI_3g34070v3	hypothetical protein		Os10g0573400	OsPYL/RCAR10	Similar to Cyclase/dehydrase family protein		AT5G46790	PYL1	Abscisic acid receptor PYL1 [Source:UniProtKB/Swiss-Prot;Acc:Q8VZS8]		43	ivory			0.0042397	0.000735284	0.00551989						4.16333	5.43667	9.00333	2.44	5.55	4.13333	14.2633	6.07333	0.203689	-2.045	-0.535698	-1.74062	-1.08725	-0.268683	1.16144
TraesCS1A03G0514700	TraesCS1A02G191800	TraesCS1A01G191800			Ta.3979.1.S1_at	123050089	LOC123050089	XP_044328869.1	mitochondrial carnitine/acylcarnitine carrier-like protein			BRADI_3g34077v3	hypothetical protein		Os10g0573700		Similar to Mitochondrial carnitine/acylcarnitine carrier-like protein (A BOUT DE SOUFFLE) (Carnitine/acylcarnitine translocase-like protein) (CAC-like protein)		AT5G46800	BOU	Mitochondrial carnitine/acylcarnitine carrier-like protein [Source:UniProtKB/Swiss-Prot;Acc:Q93XM7]		11	greenyellow	76		-0.00676719	0.0111142	-0.00328529						3.99	27.9033	11.33	24.54	8.89667	56.72	20.55	25.72	2.55159	0.766317	3.22724	-0.293822	-0.562344	2.1166	1.22293
TraesCS1A03G0515200	TraesCS1A02G192200	TraesCS1A01G192200	TRIAE_CS42_1AL_TGACv1_000222_AA0006590	Traes_1AL_3359873E7	Ta.1877.1.S1_at	123050118	LOC123050118	XP_044328893.1	uncharacterized protein LOC123050118 isoform X1			BRADI_1g60977v3	hypothetical protein		Os03g0385301		Conserved hypothetical protein		AT1G22140		At1g22140/F2E2_13 [Source:UniProtKB/TrEMBL;Acc:Q93Z58]		11	greenyellow	239		-0.0019067	0.00325736	-0.00575889						35.82	32.32	31.5233	48.2167	24.7	74.8467	28.15	33.2233	-0.100021	0.343428	1.7758	-0.631981	0.261432	2.15557	-0.182016
TraesCS1A03G0520300	TraesCS1A02G193800	TraesCS1A01G193800	TRIAE_CS42_1AL_TGACv1_003073_AA0047460									BRADI_3g34375v3	hypothetical protein										22	darkgreen			0.00353887	0.00645073	-0.0038241						1.21	0.903333	4.15	4.54	2.43	2.45667	10.8833	2.22667	-0.518809	-0.796824	0.653731	-1.84781	1.97364	0.33447	2.25166
TraesCS1A03G0523000	TraesCS1A02G194900	TraesCS1A01G194900	TRIAE_CS42_1AL_TGACv1_001109_AA0025250	Traes_1AL_A7EE33067	Ta.10648.2.S1_x_at	123050445	LOC123050445	XP_044329171.1	cinnamoyl-CoA reductase-like SNL6			BRADI_3g34280v3	hypothetical protein		Os10g0576900	OsCCR3	NAD(P)-binding domain containing protein						11	greenyellow			-0.00399192	0.00425638	-0.0044882						3.81	6.63333	7.80333	7.51333	2.70333	14.47	5.23333	8.36333	0.554126	0.124196	2.18586	0.262841	0.449109	1.20734	0.879039
TraesCS1A03G0523200	TraesCS1A02G195000	TraesCS1A01G195000			Ta.4894.1.A1_at	123053683	LOC123053683	XP_044333142.1	uncharacterized protein LOC123053683 isoform X1														50	thistle2			0.00231007	-0.00652279	-0.00204521						6.48	7.44667	6.64667	11.73	10.1133	2.80333	6.32667	3.3	-0.135016	-0.0548363	-2.21884	-1.17595	0.0759412	-0.395746	-0.00423831
TraesCS1A03G0525200	TraesCS1A02G195500	TraesCS1A01G195500	TRIAE_CS42_1AL_TGACv1_001150_AA0026060	Traes_1AL_FAA0547B8	Ta.25375.1.S1_at	123050585	LOC123050585	XP_044329297.1	probable inactive shikimate kinase like 2, chloroplastic			BRADI_3g34245v3	Probable inactive shikimate kinase like 2, chloroplastic [Source:Projected from Arabidopsis thaliana (AT2G35500) UniProtKB/Swiss-Prot;Acc:O82290]		Os10g0577700		CS domain containing protein		AT2G35500	SKL2	Probable inactive shikimate kinase like 2, chloroplastic [Source:UniProtKB/Swiss-Prot;Acc:O82290]		1	turquoise			0.00419045	0.00522261	-0.00203367						19.1133	15.4567	18.7667	7.49	18.98	36.65	23.39	8.94333	-0.35134	-1.4582	1.00756	-1.82993	-1.11818	2.51786	-0.0113179
TraesCS1A03G0526300	TraesCS1A02G195700	TraesCS1A01G195700	TRIAE_CS42_1AL_TGACv1_001574_AA0032460	Traes_1AL_55E4D53AF	TaAffx.2056.2.A1_at	123050596	LOC123050596	XP_044329305.1	lysine-specific demethylase JMJ706-like			BRADI_3g34240v3	H3K9 demethylase, Floral organ developmen [Source: Projected from Oryza sativa (Os10g0577600)]		Os10g0577600	JMJ706	H3K9 demethylase, Floral organ developmen		AT5G46910		Transcription factor jumonji (Jmj) family protein / zinc finger (C5HC2 type) family protein [Source:UniProtKB/TrEMBL;Acc:F4KIX0]		41	lightsteelblue1			-0.00735652	-0.0112904	-0.000416109						11.4167	14.28	10.53	9.17333	2.66667	5.24	0.846667	14.78	0.168175	-0.513688	0.832672	3.58326	-0.822851	-1.03941	-0.140988
TraesCS1A03G0528200	TraesCS1A02G196600	TraesCS1A01G196600	TRIAE_CS42_1AL_TGACv1_000553_AA0014560	Traes_1AL_6B8FC4A0A	Ta.13960.1.A1_at	123050771	LOC123050771	XP_044329445.1	choline-phosphate cytidylyltransferase 2-like			BRADI_3g34524v3	hypothetical protein		Os10g0578900		Similar to CTP:phosphorylcholine cytidylyltransferase (EC 2.7.7.15)						29	saddlebrown			-0.00616895	-0.00300725	-0.0102833						2.76667	3.40667	2.87	11.42	0.76	3.60667	1.32667	3.49333	0.591725	1.83769	2.03537	0.843494	1.52412	0.465417	0.27815
TraesCS1A03G0529900	TraesCS1A02G197900	TraesCS1A01G197900	TRIAE_CS42_1AL_TGACv1_000810_AA0019490	Traes_1AL_5E8074568	Ta.12723.1.S1_at	123050903	LOC123050903	XP_044329551.1	uncharacterized protein LOC123050903			BRADI_3g21670v3	hypothetical protein		Os02g0784900		RmlC-like jelly roll fold domain containing protein		AT2G32180	PTAC18	Plastid transcriptionally active 18 [Source:UniProtKB/TrEMBL;Acc:Q9SKY2]		13	salmon			0.00758712	0.00123516	-0.0031559						13.63	5.68333	23.5333	4.41333	8.71333	10.89	22.07	4.80333	-1.41634	-2.19312	0.4636	-2.67814	0.0586702	1.80208	0.83545
TraesCS1A03G0530700	TraesCS1A02G198300	TraesCS1A01G198300	TRIAE_CS42_1AL_TGACv1_001337_AA0028910	Traes_1AL_9B91417F7	Ta.25985.1.A1_at	123050950	LOC123050950	XP_044329608.1	urea-proton symporter DUR3			BRADI_3g21640v3	hypothetical protein		Os10g0580400	OsDUR3	High-affinity urea transporter, Effective urea acquisition and utilisation, Effective use of low external urea as a N sourc		AT5G45380	DUR3	DUR3 [Source:UniProtKB/TrEMBL;Acc:A0A178UG75]		3	brown	1134		-0.0106097	-0.00547593	0.00464321						1.65	7.31667	1.70333	5.41333	0.383333	1.84333	0.743333	11.8633	1.89078	1.28239	2.42856	3.59179	-0.745472	-2.13135	-0.137075
TraesCS1A03G0532400	TraesCS1A02G199200	TraesCS1A01G199200	TRIAE_CS42_1AL_TGACv1_000303_AA0008380	Traes_1AL_19817730D		123128284	LOC123128284	XP_044404350.1	uncharacterized protein LOC123128284 isoform X3			BRADI_3g32060v3	hypothetical protein		Os10g0535800		Protein of unknown function Cys-rich domain containing protein						2	blue	486		-0.00539754	-0.00407069	0.00868882						1.1	2.19667	0.96	1.74	0.296667	0.58	0.583333	5.28	1.4815	1.47401	1.05223	3.66037	-0.17916	-2.72743	-0.171674
TraesCS1A03G0533300	TraesCS1A02G199600	TraesCS1A01G199600	TRIAE_CS42_1AL_TGACv1_001072_AA0024490	Traes_1AL_6B108514B	Ta.25343.1.A1_at	123051047	LOC123051047	XP_044329737.1	MADS-box transcription factor 56-like isoform X1			BRADI_3g32090v3	hypothetical protein		Os10g0536100	OsMADS56	MIKC-type MADS-box protein, Long day (LD)-specific negative regulator of flowerin		AT2G45660	SOC1	SOC1 [Source:UniProtKB/TrEMBL;Acc:A0A178VZL4]		17	grey60	39		-0.00574396	-0.00523074	0.00241415						0.656667	3.40667	0.42	1.54333	0.253333	0.406667	0.213333	2.01667	2.66517	1.47116	1.25065	2.82505	-1.25203	-1.67008	-0.0580165
TraesCS1A03G0534000	TraesCS1A02G200000	TraesCS1A01G200000	TRIAE_CS42_1AL_TGACv1_003992_AA0052130	Traes_1AL_59BBE38D2	Ta.636.2.S1_x_at	123051088	LOC123051088	XP_044329792.1	protein CURVATURE THYLAKOID 1B, chloroplastic-like			BRADI_3g32100v3	hypothetical protein		Os10g0536500		Peptidase S10, serine carboxypeptidase, active site domain containing protein						33	darkolivegreen			0.00391303	0.0142108	0.0082364						27.4	47.5733	131.737	51.2767	144.567	162.703	395.95	158.267	0.722373	-1.40124	0.177751	-1.86887	0.0634096	0.580305	2.18702
TraesCS1A03G0535900	TraesCS1A02G200400	TraesCS1A01G200400	TRIAE_CS42_7BL_TGACv1_577173_AA1868010			123129169	LOC123129169	XP_044405371.1	uncharacterized protein LOC123129169														28	skyblue			-5.62749e-05	-0.0133132	-0.0084129						0.82	5.02667	5.16667	0.203333	0	0	0	0	2.1269	-4.04374	0	0	-3.94405	0	2.22659
TraesCS1A03G0539600	TraesCS1A02G202000	TraesCS1A01G202000	TRIAE_CS42_1AL_TGACv1_000341_AA0009440	Traes_1AL_979039A13	TaAffx.69653.1.S1_at	123051240	LOC123051240	XP_044330000.1	MLO-like protein 9			BRADI_3g32230v3	hypothetical protein		Os10g0541000	OsMLO4	Similar to Seven transmembrane protein Mlo2		AT5G65970	MLO10	MLO-like protein 10 [Source:UniProtKB/Swiss-Prot;Acc:Q9FKY5]		13	salmon			-0.00091594	-0.00175079	-0.0031463						0.426667	1.71333	3.89667	1.43333	0.103333	0.89	2.52333	2.02667	1.63343	-1.47826	1.90134	-0.94374	-0.515838	-0.503666	2.59584
TraesCS1A03G0539800	TraesCS1A02G202100	TraesCS1A01G202100	TRIAE_CS42_1AL_TGACv1_002723_AA0044730	Traes_1AL_F8E79B82F	TaAffx.121307.1.S1_at	123129538	LOC123129538	XP_044405619.1	serine carboxypeptidase-like 34			BRADI_3g32247v3	hypothetical protein										26	darkorange	14		0.00816271	-0.000102031	0.00214503						2.77667	1.70333	6.70333	0.9	5.61333	1.57333	7.01	1.22	-0.675798	-2.47317	-1.70008	-3.26087	-0.520303	1.2551	1.27707
TraesCS1A03G0541600	TraesCS1A02G203200	TraesCS1A01G203200	TRIAE_CS42_1AL_TGACv1_001534_AA0031810		TaAffx.560.2.S1_at	123051326	LOC123051326	XP_044330124.1	expansin-like A2			BRADI_3g32297v3	hypothetical protein										8	pink	28		0.00698346	-0.00132252	0.00626832						2.59667	0.786667	4.27667	0.0866667	3.72333	0.98	2.80667	1.38667	-2.08164	-4.66321	-1.73768	-1.85136	-2.14299	0.500587	0.438591
TraesCS1A03G0542400	TraesCS1A02G203600	TraesCS1A01G203600			Ta.26983.1.A1_at	123051355	LOC123051355	XP_044330157.1	chitinase 8-like														3	brown	1039		-0.0203413	-0.00783205	0.00152341						17.6733	117.59	14.7867	120.65	6.09	40.18	3.04667	182.233	2.49465	2.75111	2.57495	5.42046	-0.13548	-1.83885	-0.391941
TraesCS1A03G0542500	TraesCS1A02G203700	TraesCS1A01G203700	TRIAE_CS42_1AL_TGACv1_001221_AA0027180		Ta.2784.1.A1_at	542775	LOC542775	XP_044330165.1	chitinase 8	Chi 1		BRADI_3g32340v3	hypothetical protein		Os10g0542900	Cht8	Similar to chitinase						9	magenta	48		-0.0148278	0.00783751	0.00441						18.3733	43.8467	7.55	92.5233	18.93	101.093	8.25	138.863	1.11003	3.34242	2.40866	3.61001	0.922512	0.0905658	-1.30988
TraesCS1A03G0542700	TraesCS1A02G203800	TraesCS1A01G203800										BRADI_3g32350v3	hypothetical protein		Os10g0543500	OsSTRL19	Six-bladed beta-propeller, TolB-like domain containing protein		AT3G51440	SSL6	Protein STRICTOSIDINE SYNTHASE-LIKE 6 [Source:UniProtKB/Swiss-Prot;Acc:Q9SD05]		19	lightyellow	635		-0.0095947	-0.00236775	0.00440774						7.34667	17.23	5.85667	16.4467	4.25333	11.53	3.22333	28.1533	1.03426	1.44591	1.58182	2.59811	-0.232856	-0.712974	-0.644502
TraesCS1A03G0547900	TraesCS1A02G206800	TraesCS1A01G206800	TRIAE_CS42_1AL_TGACv1_000103_AA0003440			123131693	LOC123131693	XP_044407328.1	cyclin-dependent protein kinase inhibitor SMR1-like			BRADI_3g32670v3	hypothetical protein		Os10g0546400		Conserved hypothetical protein						4	yellow			-0.00211025	-0.000137383	0.00548229						0.746667	0.936667	1.15667	0.2	0.5	1.18667	0.216667	2.21	0.526031	-1.47622	1.17119	3.4232	-1.31689	-0.318098	0.685358
TraesCS1A03G0550500	TraesCS1A02G207900	TraesCS1A01G207900	TRIAE_CS42_1AL_TGACv1_002406_AA0041610	Traes_1AL_502E34D07	TaAffx.89019.1.S1_at	123131981	LOC123131981	XP_044407692.1	U-box domain-containing protein 33-like isoform X1			BRADI_3g32787v3	hypothetical protein		Os10g0552400	OsPUB67	Zinc finger, RING/FYVE/PHD-type domain containing protein						3	brown	1017		-0.0136215	-0.00771372	0.00482472						1.36333	7.72	0.86	7.46333	0.0933333	1.16667	0.11	12.93	2.50234	2.41001	2.21246	6.64929	-0.195054	-3.26976	-0.102722
TraesCS1A03G0556000	TraesCS1A02G210800	TraesCS1A01G210800	TRIAE_CS42_1AL_TGACv1_003100_AA0047720	Traes_1AL_074FF2020	TaAffx.11684.1.S1_at	123051797	LOC123051797	XP_044330714.1	oxysterol-binding protein-related protein 1B-like			BRADI_3g33020v3	hypothetical protein										18	lightgreen	148		-0.00826247	0.00247719	-0.00596881						0.623333	3.36	0.863333	5.74667	0.69	4.01667	0.506667	2.93	2.0801	2.22849	2.80025	2.16903	0.456186	0.826701	0.307796
TraesCS1A03G0556700	TraesCS1A02G211000	TraesCS1A01G211000	TRIAE_CS42_1AL_TGACv1_000363_AA0010200	Traes_1AL_E5AFC5752	TaAffx.3769.1.A1_at	123051806	LOC123051806	XP_044330723.1	protein NRT1/ PTR FAMILY 6.3-like			BRADI_3g33040v3	hypothetical protein		Os10g0554200	NRT1.1B	TGF-beta receptor, type I/II extracellular region family protein						27	white			0.00536279	-0.00482396	-0.00933463						25.28	17.3733	50.69	29.6767	20.21	11.8233	41.6133	9.17667	-0.68276	-0.932067	-0.7075	-2.78669	0.633757	0.945588	0.883064
TraesCS1A03G0557300	TraesCS1A02G211500	TraesCS1A01G211500	TRIAE_CS42_1AL_TGACv1_002007_AA0037760	Traes_1AL_31A8452CD		123051816	LOC123051816	XP_044330733.1	putative glucuronosyltransferase PGSIP8			BRADI_3g33080v3	hypothetical protein		Os10g0555100	OsGGT	Similar to DNA chromosome 4, ESSA I CONTIG fragment NO. 6 (Glucosyltransferase like protein)						41	lightsteelblue1			-0.00402046	-0.00620955	0.000170277						5.74	2.82333	4.12667	2.82667	1.28667	3.01667	0.226667	5.17667	-1.40321	-1.00342	0.998257	4.02255	-0.223117	-0.404325	-0.622902
TraesCS1A03G0558000	TraesCS1A02G212000	TraesCS1A01G212000	TRIAE_CS42_1AL_TGACv1_000456_AA0012510	Traes_1AL_E12BF1698	Ta.24120.1.S1_at	123051845	LOC123051845	XP_044330769.1	expansin-B6-like isoform X2			BRADI_3g33106v3	hypothetical protein		Os10g0555600	OsEXPB6	Beta-expansin precursor						43	ivory			0.0214747	-0.00548858	-0.0010954						8.52	2.15	43.8033	0	8.97333	0.663333	72.5333	0.333333	-2.18667	-9.8887	-3.81638	-8.80664	-5.40175	1.96349	2.30029
TraesCS1A03G0559100	TraesCS1A02G212400	TraesCS1A01G212400	TRIAE_CS42_1AL_TGACv1_002200_AA0039680	Traes_1AL_DDC13A76D	Ta.3274.1.S1_at	123051853	LOC123051853	XP_044330780.1	expansin-B3-like			BRADI_3g33150v3	hypothetical protein		Os10g0555900	OsEXPB3	Similar to Beta-expansin						27	white			0.0054455	-0.00220773	-0.00177434						0.0666667	0.793333	6.23667	0.246667	1.05	0.183333	3.18333	0.543333	3.51464	-6.97044	-3.22264	-3.3559	-3.76322	-1.43331	6.72187
TraesCS1A03G0561600	TraesCS1A02G213600	TraesCS1A01G213600	TRIAE_CS42_1AL_TGACv1_000893_AA0021300		Ta.495.2.S1_at	123051953	LOC123051953	XP_044330905.1	haloacid dehalogenase-like hydrolase domain-containing protein Sgpp			BRADI_3g33880v3	hypothetical protein						AT2G38740	SGPP	Haloacid dehalogenase-like hydrolase domain-containing protein Sgpp [Source:UniProtKB/Swiss-Prot;Acc:Q9ZVJ5]		15	midnightblue	87		-0.0116314	0.010071	-0.00229225						27.99	83.7767	18.84	135.277	36.6967	233.153	22.6133	120.123	1.47595	2.52683	2.78406	1.81927	0.455604	1.53482	-0.595267
TraesCS1A03G0562000	TraesCS1A02G213700	TraesCS1A01G213700	TRIAE_CS42_1AL_TGACv1_000090_AA0002970	Traes_1AL_B142937BB		123134452	LOC123134452	XP_044409675.1	VAN3-binding protein-like			BRADI_3g33870v3	hypothetical protein		Os10g0568300		Hypothetical conserved gene						2	blue			-0.00500222	0.00271133	0.00551906						0	0.536667	0	0.426667	0	0.896667	0	2.05333	7.24385	7.12629	6.51613	8.44453	-0.15331	-0.376326	0
TraesCS1A03G0565000	TraesCS1A02G214600	TraesCS1A01G214600	TRIAE_CS42_1AL_TGACv1_001486_AA0031190	Traes_1AL_4737EEBB2	TaAffx.112268.1.S1_at	123052022	LOC123052022	XP_044330997.1	10 kDa chaperonin 1, chloroplastic-like			BRADI_3g33770v3	hypothetical protein		Os10g0566700		Chaperonin Cpn10 family protein		AT3G60210	CPN10-1	10 kDa chaperonin 1, chloroplastic [Source:UniProtKB/Swiss-Prot;Acc:Q9M1C2]		1	turquoise			0.000195228	0.00435343	-0.000448736						15.2	11.25	16.8933	11.6033	10.5667	26.4533	19.3433	17.94	-0.0894264	-0.154472	2.17605	-0.782718	0.101747	2.2242	0.166792
TraesCS1A03G0568300	TraesCS1A02G215500	TraesCS1A01G215500	TRIAE_CS42_1AL_TGACv1_001798_AA0035330		Ta.16135.1.A1_at	123052101	LOC123052101	XP_044331127.1	beta-amylase 3, chloroplastic-like			BRADI_3g33730v3	Beta-amylase 3, chloroplastic [Source:Projected from Arabidopsis thaliana (AT4G17090) UniProtKB/Swiss-Prot;Acc:O23553]						AT4G17090	BAM3	Beta-amylase 3, chloroplastic [Source:UniProtKB/Swiss-Prot;Acc:O23553]		34	darkmagenta			-0.00379309	-0.000458386	-0.00339049						6.61667	11.14	34.2967	28.2233	4.45333	12.9767	22.28	33.22	0.585383	-0.458591	1.41433	0.0400053	1.21034	-0.899735	2.25431
TraesCS1A03G0572300	TraesCS1A02G217100	TraesCS1A01G217100	TRIAE_CS42_1AL_TGACv1_001360_AA0029310			123052259	LOC123052259	XP_044331322.1	uncharacterized protein LOC123052259						Os10g0563800		Hypothetical conserved gene						37	skyblue3			-0.00253179	-0.00997887	0.00340259						6.45667	3.84333	5.69	2.72333	2.67667	1.65333	0.176667	5.64	-0.983716	-1.32628	-1.06505	3.89824	-0.61345	-1.25505	-0.270888
TraesCS1A03G0574000	TraesCS1A02G218100	TraesCS1A01G218100	TRIAE_CS42_1AL_TGACv1_000361_AA0010050	Traes_1AL_7BE5906B2		123136071	LOC123136071	XP_044411320.1	ethylene-responsive transcription factor 6-like														24	darkgrey			0.00234276	-0.00223593	0.00481507						20.0433	5.02333	34.8333	6.33	13.6033	14.6367	5.85	21.5967	-2.03363	-2.45056	0.357753	1.55943	0.249362	0.0263036	0.666295
TraesCS1A03G0576000	TraesCS1A02G219200	TraesCS1A01G219200	TRIAE_CS42_1AL_TGACv1_000454_AA0012430	Traes_1AL_1444D461A		123052429	LOC123052429	XP_044331539.1	homeobox-leucine zipper protein HOX1-like			BRADI_3g33410v3	hypothetical protein		Os10g0561800	Oshox1	Similar to homeodomain leucine zipper protein hox1						11	greenyellow			0.00191578	0.00691074	-0.0039766						0.713333	0.306667	1.86	2.72667	1.95	3.02667	3.74	1.06667	-1.73763	0.242169	0.710492	-2.11796	2.80682	1.72613	0.827021
TraesCS1A03G0577500	TraesCS1A02G220300	TraesCS1A01G220300	TRIAE_CS42_1AL_TGACv1_000433_AA0012040	Traes_1AL_2EE300C85		123052499	LOC123052499	XP_044331641.1	transcription factor GHD7-like isoform X2	CO9		BRADI_3g33341v3	hypothetical protein		Os10g0560400	OsCCT35	Similar to CONSTANS-like protein CO9 (Fragment)						16	lightcyan	94		-0.00990336	0.00710139	-0.00196569						0.04	0.873333	0.156667	4.53333	0.126667	3.91667	0.11	4.06	3.98582	5.42251	5.15971	4.92838	2.41916	0.820506	0.98246
TraesCS1A03G0577600	TraesCS1A02G220400	TraesCS1A01G220400	TRIAE_CS42_1AL_TGACv1_003720_AA0051190		TaAffx.19975.2.A1_at	123052506	LOC123052506	XP_044331654.1	cell number regulator 6-like														29	saddlebrown			-0.00442758	0.000304631	-0.00674554						0.283333	0.8	0.0666667	2.38	0.0633333	0.88	0	0.363333	3.95092	4.08643	4.50939	3.06739	1.96247	2.26029	1.82695
TraesCS1A03G0578300	TraesCS1A02G221000	TraesCS1A01G221000	TRIAE_CS42_1AL_TGACv1_003067_AA0047410	Traes_1AL_185F58500	Ta.24650.2.A1_at	123052547	LOC123052547	XP_044331722.1	D-3-phosphoglycerate dehydrogenase 2, chloroplastic-like isoform X2														27	white			0.00499067	-0.00273453	0.00154404						2.59333	1.57667	5.96333	0.78	2.04	1.23667	4.1	1.72	-0.57734	-2.99065	-0.70133	-1.81337	-0.674282	-0.0715802	1.73903
TraesCS1A03G0578800	TraesCS1A02G221400	TraesCS1A01G221400	TRIAE_CS42_1AL_TGACv1_001255_AA0027830			123181704	LOC123181704	XP_044449959.1	metalloendoproteinase 1-MMP-like			BRADI_3g33217v3	hypothetical protein		Os10g0557900		Peptidase M10A and M12B, matrixin and adamalysin family protein		AT4G16640	1MMP	Metalloendoproteinase 1-MMP [Source:UniProtKB/Swiss-Prot;Acc:O23507]		3	brown	360		-0.00321752	-0.00326434	0.0128587						1.66667	4.73333	1.70667	2.42667	2.80667	1.06	1.97667	7.35667	1.36974	0.721964	-1.34058	1.23171	-0.977813	-2.09382	-0.330035
TraesCS1A03G0579500	TraesCS1A02G221700	TraesCS1A01G221700	TRIAE_CS42_1AL_TGACv1_002432_AA0041870			123052600	LOC123052600	XP_044331788.1	uncharacterized protein LOC123052600			BRADI_3g32047v3	hypothetical protein										23	darkturquoise			-0.00175404	-0.00304745	0.00314513						3.28333	1.54667	4.22	1.17667	1.70333	2.65	0.183333	4.25667	-1.17835	-1.80257	0.393175	3.35566	-0.614882	-0.418445	0.00933685
TraesCS1A03G0589000	TraesCS1A02G225800	TraesCS1A01G225800	TRIAE_CS42_1AL_TGACv1_000513_AA0013710			123137836	LOC123137836	XP_044413651.1	metallothionein-like protein 1			BRADI_2g28254v3	hypothetical protein		Os11g0704500	MT1A	Metallothionein-like protein type 1						45	darkorange2			0.00221815	0.0022639	0.00131085						0	0	0	0	0.343333	0	2.22333	0	-1.31837	-2.76418	-2.4673	-5.26189	-0.54944	0.246231	0.896373
TraesCS1A03G0592000	TraesCS1A02G227300	TraesCS1A01G227300			Ta.11488.1.S1_x_at	123052957	LOC123052957	XP_044332265.1	receptor-like protein kinase FERONIA														11	greenyellow			-0.00525186	0.00183255	-0.0100833						2.33	2.39333	7.14333	6.97333	0.506667	11.1	2.04667	5.11	0.0162604	-0.270921	3.9633	0.720465	1.25302	1.58718	1.5402
TraesCS1A03G0593400	TraesCS1A02G228100	TraesCS1A01G228100	TRIAE_CS42_1AL_TGACv1_000141_AA0004520	Traes_1AL_E511FAB63		123053010	LOC123053010	XP_044332317.1	probable protein phosphatase 2C 48 isoform X1														34	darkmagenta	129		-0.00545559	0.000525166	0.00433099						0.393333	1.42667	0.123333	0.996667	0.13	0.976667	0.266667	2.47333	2.23735	2.47234	2.42933	2.87132	-0.756238	-0.731006	-0.991232
TraesCS1A03G0597600	TraesCS1A02G230100	TraesCS1A01G230100	TRIAE_CS42_1AL_TGACv1_000188_AA0005670	Traes_1AL_4F69555EE	Ta.13757.1.S1_x_at	123053213	LOC123053213	XP_044332590.1	mitochondrial zinc maintenance protein 1, mitochondrial-like			BRADI_2g27840v3	hypothetical protein		Os05g0363600		Similar to Catalytic/ oxidoreductase, acting on NADH or NADPH		AT3G62810		At3g62810 [Source:UniProtKB/TrEMBL;Acc:Q9LZI4]		11	greenyellow	227		0.000274882	0.00603693	-0.0079958						9.83667	6.28	11.8367	13.8467	8.92667	24.2633	10.7467	7.54667	-0.543286	-0.0335809	1.91028	-0.994568	0.893116	2.51167	0.383412
TraesCS1A03G0598600	TraesCS1A02G230400	TraesCS1A01G230400	TRIAE_CS42_1AL_TGACv1_002920_AA0046380	Traes_1AL_9FF8D3F8A	Ta.22605.1.S1_x_at	123053236	LOC123053236	XP_044332622.1	UDP-glucuronic acid decarboxylase 2-like			BRADI_2g27870v3	hypothetical protein		Os05g0363200	OsUXS5	UDP-glucuronic acid decarboxylase		AT3G62830	UXS2	UDP-glucuronic acid decarboxylase 2 [Source:UniProtKB/Swiss-Prot;Acc:Q9LZI2]		9	magenta	200		-0.00968627	-0.000733509	-0.00172565						28.48	50.8167	24.41	61.9633	13.04	55.1133	12.6933	77.36	0.647184	1.06322	2.053	2.19957	0.0928806	-0.0987068	-0.32315
TraesCS1A03G0603300	TraesCS1A02G232500	TraesCS1A01G232500	TRIAE_CS42_1AL_TGACv1_000153_AA0004910	Traes_1AL_AB3B8B93E								BRADI_2g27680v3	hypothetical protein										4	yellow	432		-0.00632478	-0.00170844	0.014828						0.32	1.10333	0.476667	0.593333	0.163333	0.393333	0.326667	7.99	1.08904	-0.171053	2.27276	4.72526	-0.903672	-3.77209	0.356418
TraesCS1A03G0603400	TraesCS1A02G232600	TraesCS1A01G232600	TRIAE_CS42_1AL_TGACv1_002619_AA0043740	Traes_1AL_BE02CD6FA		123139793	LOC123139793	XP_044415459.1	NRR repressor homolog 1-like			BRADI_2g27670v3	hypothetical protein		Os05g0368100		Conserved hypothetical protein						4	yellow	56		-0.00341405	0.00162055	0.00663866						0	0.12	0.233333	0.333333	0	0.37	0.113333	2.13	2.05462	0.693271	4.25254	3.21099	0.643185	-1.60483	2.00453
TraesCS1A03G0606500	TraesCS1A02G233700	TraesCS1A01G233700	TRIAE_CS42_1AL_TGACv1_002484_AA0042310	Traes_1AL_C7C9FD255	Ta.13137.1.A1_at	123053445	LOC123053445	XP_044332864.1	acyl carrier protein 2, mitochondrial-like			BRADI_2g27090v3	hypothetical protein		Os05g0377000		Similar to Acyl carrier protein		AT1G65290	MTACP2	Acyl carrier protein 2, mitochondrial [Source:UniProtKB/Swiss-Prot;Acc:O80800]		44	floralwhite	67		-0.00365507	0.0054854	-0.000683949						25.62	35.09	31.2133	34.11	19.8967	84.1433	30.8733	53.1933	0.421074	-0.0765738	2.22297	0.217464	-0.237417	1.46127	0.260231
TraesCS1A03G0608300	TraesCS1A02G234600	TraesCS1A01G234600	TRIAE_CS42_1AL_TGACv1_000735_AA0018120	Traes_1AL_AE0660A78	Ta.10.1.S1_a_at	123053516	LOC123053516	XP_044332919.1	lichenase-2-like			BRADI_2g27140v3	hypothetical protein		Os05g0375400	OsPR2	Beta-glucanase precursor						25	orange	51		0.0221986	-0.0102139	0.0102478			A			359.243	20.4333	121.513	9.15	317.523	15.02	255.567	11.4567	-4.18245	-3.94131	-4.67907	-5.04192	-1.32154	0.674137	-1.56267
TraesCS1A03G0609600	TraesCS1A02G234800	TraesCS1A01G234800	TRIAE_CS42_1AL_TGACv1_002523_AA0042820	Traes_1AL_A2DA8A6AE		123053593	LOC123053593	XP_044333004.1	cytokinin dehydrogenase 9-like			BRADI_2g27170v3	hypothetical protein		Os05g0374200	OsCKX9	Similar to Cytokinin dehydrogenase 2		AT2G41510	ATCKX1	cytokinin oxidase/dehydrogenase 1 [Source:TAIR;Acc:AT2G41510]		38	plum1			0.00979157	-0.00288881	0.009423						3.79667	0.63	2.29	0.493333	12.61	0.223333	2.91333	0.676667	-2.55504	-2.13153	-6.22701	-2.34772	-0.515671	-1.80691	-0.93918
TraesCS1A03G0610900	TraesCS1A02G235100	TraesCS1A01G235100	TRIAE_CS42_1AL_TGACv1_000944_AA0022350	Traes_1AL_7C3E4A07E		123053623	LOC123053623	XP_044333058.1	diacylglycerol kinase 1-like						Os03g0425300		Similar to DGK1 (DIACYLGLYCEROL KINASE1); calcium ion binding / diacylglycerol kinase		AT5G07920	DGK1	Diacylglycerol kinase 1 [Source:UniProtKB/Swiss-Prot;Acc:Q39017]		15	midnightblue	113		-0.00702909	0.00749208	-0.00286439						0.36	1.57667	0.236667	3.23	0.64	4.74	0.506667	2.49667	2.18708	3.18554	3.0233	1.88953	0.851896	1.85556	-0.146566
TraesCS1A03G0615200	TraesCS1A02G236400	TraesCS1A01G236400	TRIAE_CS42_1AL_TGACv1_001138_AA0025740	Traes_1AL_CD627FE88		123053786	LOC123053786	XP_044333275.1	uncharacterized protein LOC123053786			BRADI_2g27330v3	hypothetical protein		Os05g0372800	OsFbox257	Cyclin-like F-box domain containing protein						9	magenta	334		-0.0105546	0.00123212	-0.000590483						1.65667	5.36667	1.44333	8.39333	1.19	5.96333	0.616667	8.98	1.67909	2.38624	2.31153	2.63216	0.416597	0.366149	-0.290558
TraesCS1A03G0621900	TraesCS1A02G238800	TraesCS1A01G238800	TRIAE_CS42_1AL_TGACv1_004249_AA0052940	Traes_1AL_80931BE4C		123142464	LOC123142464	XP_044417327.1	probable calcium-binding protein CML15			BRADI_2g27050v3	hypothetical protein		Os05g0380900	OsCML15	Similar to Polcalcin Jun o 2 (Calcium-binding pollen allergen Jun o 2)						2	blue			-0.00467661	-0.00661079	0.0106947						7.53	4.87667	5.56333	4.81	5.33667	3.10667	0.82	17.2733	-0.633677	-0.614357	-0.702395	3.72512	-0.865108	-1.40416	-0.884428
TraesCS1A03G0622900	TraesCS1A02G239400	TraesCS1A01G239400	TRIAE_CS42_1AL_TGACv1_001261_AA0027950		TaAffx.112819.1.S1_at	123142943	LOC123142943	XP_044417627.1	cytochrome P450 94A1-like			BRADI_2g26752v3	hypothetical protein		Os05g0382500		Similar to Cytochrome P450 CYP94E4						2	blue	727		-0.0102569	-0.00185858	0.0109006						0.373333	3.09333	0.163333	1.97667	0.126667	1.08333	0.203333	8.67333	3.15472	3.23278	2.0858	5.10873	-1.01264	-2.67061	-1.0907
TraesCS1A03G0623200	TraesCS1A02G239600	TraesCS1A01G239600	TRIAE_CS42_1AL_TGACv1_000627_AA0016200	Traes_1AL_9699BA478		123053937	LOC123053937	XP_044333504.1	annexin D4-like			BRADI_2g26760v3	hypothetical protein		Os05g0382600	OsANN3	Similar to Annexin-like protein RJ4						8	pink			0.00658704	-0.0108373	0.00792899						9.03	6.62	14.35	0.903333	4.70667	0.863333	8.66667	4.96	-0.459928	-4.32968	-2.34908	-1.25559	-3.25564	-1.78353	0.614112
TraesCS1A03G0628300	TraesCS1A02G242600	TraesCS1A01G242600	TRIAE_CS42_1AL_TGACv1_000371_AA0010490	Traes_1AL_4207C2DCC	Ta.20654.1.S1_x_at	123054251	LOC123054251	XP_044333916.1	protein RETICULATA-RELATED 4, chloroplastic-like			BRADI_2g26950v3	hypothetical protein		Os05g0388600		Protein of unknown function DUF3411 domain containing protein		AT5G12470	RER4	Protein RETICULATA-RELATED 4, chloroplastic [Source:UniProtKB/Swiss-Prot;Acc:Q94CJ5]		16	lightcyan	261		-0.013247	0.00895688	-0.00559812			B			8.51333	53.6833	15.32	80.4667	10.9867	115.12	13.3433	73.7133	2.52708	2.26046	3.69802	1.78665	0.433458	1.36254	0.700079
TraesCS1A03G0628500	TraesCS1A02G242800	TraesCS1A01G242800	TRIAE_CS42_1AL_TGACv1_000371_AA0010510	Traes_1AL_DEF14D73D		123054259	LOC123054259	XP_044333928.1	AP2-like ethylene-responsive transcription factor SMOS1			BRADI_2g26987v3	hypothetical protein		Os05g0389000	ERF142	Similar to AP2-1 protein (Fragment)		AT2G41710		Integrase-type DNA-binding superfamily protein [Source:TAIR;Acc:AT2G41710]		18	lightgreen	13		-0.00592106	0.0013473	-0.00636224						0.0466667	1.22667	0.3	3	0.17	1.47333	0.1	0.936667	3.14254	3.77074	4.02432	3.84118	0.895548	0.853687	0.267339
TraesCS1A03G0631000	TraesCS1A02G244300	TraesCS1A01G244300	TRIAE_CS42_1AL_TGACv1_000219_AA0006470	Traes_1AL_135B552D8		123054421	LOC123054421	XP_044334135.1	probable membrane-associated kinase regulator 1			BRADI_2g26620v3	Probable membrane-associated kinase regulator 1 [Source:Projected from Arabidopsis thaliana (AT5G26230) UniProtKB/Swiss-Prot;Acc:Q3E936]		Os05g0390600		Conserved hypothetical protein						39	orangered4			-0.00483074	0.00162105	-0.00323143						0.0833333	0.663333	0.386667	2.73333	0.126667	1.01333	0.26	1.36333	2.06724	2.36899	2.61386	2.13082	1.49039	-0.100394	1.18864
TraesCS1A03G0632500	TraesCS1A02G244900	TraesCS1A01G244900	TRIAE_CS42_1AL_TGACv1_000230_AA0006770	Traes_1AL_CCD12AF18	TaAffx.73387.1.S1_at	123054447	LOC123054447	XP_044334164.1	xylan glycosyltransferase MUCI21-like			BRADI_2g26590v3	hypothetical protein		Os05g0391600		Glycosyltransferase AER61, uncharacterized domain containing protein						32	violet	27		0.0046398	-0.00207974	0.00397751						1.62333	1.26	2.62	0.633333	2.77667	0.546667	3.02333	1.16333	-0.79926	-2.44746	-2.48017	-1.7084	-1.11481	-0.904474	0.533386
TraesCS1A03G0634400	TraesCS1A02G245500	TraesCS1A01G245500	TRIAE_CS42_1AL_TGACv1_002428_AA0041840	Traes_1AL_C67577AB2	TaAffx.116171.1.S1_at							BRADI_2g26520v3	hypothetical protein		Os05g0392200		Similar to Methylase						7	black	504		0.0160609	-0.0043282	0.00160671			A			12.0233	0.746667	10.53	0.303333	10.72	0.98	11.3133	0.3	-4.27555	-3.155	-3.57773	-4.14489	0.746738	0.8616	-0.373818
TraesCS1A03G0639500	TraesCS1A02G247100	TraesCS1A01G247100	TRIAE_CS42_1AL_TGACv1_004553_AA0053840	Traes_1AL_EC42C010D	Ta.9650.1.A1_at	123054669	LOC123054669	XP_044334421.1	isoamylase 2, chloroplastic-like			BRADI_2g26170v3	ISA2 [Source:Projected from Arabidopsis thaliana (AT1G03310) UniProtKB/TrEMBL;Acc:A0A178WGA8]		Os05g0393700	OsISA2	Similar to Isoamylase-type starch debranching enzyme ISO2		AT1G03310	ISA2	ISA2 [Source:UniProtKB/TrEMBL;Acc:A0A178WGA8]		47	bisque4			-0.00898048	-0.00501098	-0.00578781						0.446667	6.76	2.51	5.95667	0.24	1.73667	0.633333	3.70333	4.19216	1.16657	2.63548	2.09265	-0.220568	-0.683356	2.80502
TraesCS1A03G0642400	TraesCS1A02G248000	TraesCS1A01G248000	TRIAE_CS42_1AL_TGACv1_001050_AA0024030			123054771	LOC123054771	XP_044334553.1	uncharacterized protein LOC123054771			BRADI_2g26250v3	hypothetical protein		Os05g0395400		Hypothetical protein						2	blue	15		-0.00363972	0.00159652	0.00701632						0.66	0.366667	2.42333	2.92333	1.36	1.26667	0.65	6.03333	-0.217099	-1.01968	1.1454	2.42968	0.505871	-0.693281	1.30845
TraesCS1A03G0642800	TraesCS1A02G248300	TraesCS1A01G248300	TRIAE_CS42_1AL_TGACv1_005196_AA0054630			123054798	LOC123054798	XP_044334583.1	uncharacterized protein LOC123054798			BRADI_2g26280v3	hypothetical protein		Os05g0397300		Conserved hypothetical protein						27	white			0.00452853	-0.00392859	0.000575682						8.66667	10.3	34.3933	5.98667	9.66333	6.76667	19.5733	9.68333	0.198066	-2.64696	-0.734829	-1.62585	-0.89954	-0.130065	1.94549
TraesCS1A03G0645000	TraesCS1A02G249000	TraesCS1A01G249000	TRIAE_CS42_1AL_TGACv1_001161_AA0026280	Traes_1AL_A30B15F4A	TaAffx.109118.1.S1_at	123054854	LOC123054854	XP_044334659.1	anthocyanidin 3-O-glucosyltransferase 2-like			BRADI_1g26760v3	hypothetical protein		Os07g0503500	OsUGT707A3	UDP-glucuronosyl/UDP-glucosyltransferase family protein						15	midnightblue			-0.00245587	0.00824388	-0.000182848						0.45	1.2	2.04333	2.99667	1.04667	4.97333	3.45333	4.03333	0.820998	0.00617091	2.33364	-0.291322	1.11173	1.10454	1.92656
TraesCS1A03G0646500	TraesCS1A02G250100	TraesCS1A01G250100	TRIAE_CS42_1AL_TGACv1_004364_AA0053330	Traes_1AL_43793ABCE	Ta.517.1.A1_at	123144589	LOC123144589	XP_044419757.1	endo-1,3;1,4-beta-D-glucanase-like			BRADI_2g25990v3	hypothetical protein		Os05g0400100		Dienelactone hydrolase domain containing protein						11	greenyellow			-0.00249883	0.00573467	-0.0136576						2.83	11.04	18.2433	18.46	5.33	19.8867	12.2833	6.84333	1.74271	-0.326689	1.90708	-1.36039	0.458938	1.95188	2.52834
TraesCS1A03G0647700	TraesCS1A02G250700	TraesCS1A01G250700	TRIAE_CS42_U_TGACv1_641232_AA2089140	Traes_1AL_66905FFA1	Ta.11633.1.S1_at	123054981	LOC123054981	XP_044334800.1	nodulation protein H-like			BRADI_1g61700v3	hypothetical protein		Os03g0363950		Similar to nodulation protein-related						11	greenyellow	563		-0.00329396	0.00813173	-0.008218						0.12	0.376667	0.3	1.44333	0.29	3.7	0.236667	0.37	1.10979	1.92459	3.61414	-0.377658	1.70036	4.03528	0.885561
TraesCS1A03G0649900	TraesCS1A02G251900	TraesCS1A01G251900				123055111	LOC123055111	XP_044334981.1	probable aspartic proteinase GIP2			BRADI_2g25850v3	hypothetical protein		Os05g0402900	OsBphi262	Similar to EDGP		AT1G03220		Eukaryotic aspartyl protease family protein [Source:UniProtKB/TrEMBL;Acc:Q9ZVS4]		1	turquoise	655		-0.00526479	0.0178118	-0.00196705						0.366667	0.573333	0.686667	1.86333	1.38667	21.27	0.813333	3.32333	0.266023	1.43098	4.33894	1.29876	1.37326	3.58826	0.208299
TraesCS1A03G0651100	TraesCS1A02G253000	TraesCS1A01G253000	TRIAE_CS42_1AL_TGACv1_001946_AA0037080	Traes_1AL_9692F605A	Ta.14431.1.S1_at	100049042	LOC100049042	XP_044335064.1	methyl-CpG-binding domain-containing protein 4			BRADI_2g25777v3	hypothetical protein		Os05g0404600		Methyl-CpG DNA binding domain containing protein						11	greenyellow	311		-0.00152704	0.00453336	-0.00585536						8.03333	6.37	8.04667	10.48	5.61667	17.8667	7.12667	7.5	-0.373096	0.277009	1.96338	-0.570875	0.557455	2.23047	-0.0926495
TraesCS1A03G0653000	TraesCS1A02G253900	TraesCS1A01G253900	TRIAE_CS42_1AL_TGACv1_000245_AA0007130	Traes_1AL_2F272AE06		123055228	LOC123055228	XP_044335151.1	cytochrome P450 734A1-like						Os05g0405600		Similar to Cytochrome P450 CYP721B4						5	green	429		-0.00830136	-0.00984789	0.00269274						9.22333	19.5767	7.73333	18.3567	4.21667	5.00667	2.89667	21.8633	0.925253	1.1883	0.190557	2.40839	-0.160375	-1.75462	-0.423426
TraesCS1A03G0654000	TraesCS1A02G254500	TraesCS1A01G254500	TRIAE_CS42_1AL_TGACv1_000202_AA0006030	Traes_1AL_C02321B08	Ta.12346.1.A1_at	123055280	LOC123055280	XP_044335213.1	uncharacterized protein LOC123055280			BRADI_2g25630v3	hypothetical protein		Os05g0406100		Inosine/uridine-preferring nucleoside hydrolase domain containing protein						11	greenyellow			0.000700031	0.00100122	-0.00821397						2.28667	1.84333	2.86667	3.11	2.66	3.54333	1.34667	0.743333	-0.571014	-0.161781	0.301762	-1.63855	0.605939	2.55666	0.196706
TraesCS1A03G0654300	TraesCS1A02G254600	TraesCS1A01G254600	TRIAE_CS42_1AL_TGACv1_002445_AA0042060	Traes_1AL_B1D1B1328		123055288	LOC123055288	XP_044335221.1	uncharacterized protein LOC123055288 isoform X1														25	orange	32		0.00613494	-0.00232796	0.00210269			A			2.13	0.0466667	0.963333	0.09	1.97333	0.186667	0.98	0.0333333	-5.00007	-4.0823	-3.74135	-4.65445	-0.113065	1.96561	-1.03082
TraesCS1A03G0655800	TraesCS1A02G255100	TraesCS1A01G255100	TRIAE_CS42_1AL_TGACv1_002026_AA0037970		Ta.5616.3.S1_a_at	123055338	LOC123055338	XP_044335271.1	gibberellin receptor GID1-like	GID1,gid1-A1		BRADI_2g25600v3	Soluble gibberellin receptor, Gibberellin signalin [Source: Projected from Oryza sativa (Os05g0407500)]		Os05g0407500	GID1	Soluble gibberellin receptor, Gibberellin signalin		AT5G27320	GID1C	GID1C [Source:UniProtKB/TrEMBL;Acc:A0A178UKX0]		3	brown			-0.00590638	-0.0085653	0.00480758						9.45333	8.46333	6.59	10.29	4.94	7.76667	1.71667	15.2867	-0.163087	0.13149	0.496953	2.29599	-0.13616	-0.689512	-0.430737
TraesCS1A03G0656400	TraesCS1A02G255400	TraesCS1A01G255400	TRIAE_CS42_1AL_TGACv1_001353_AA0029200	Traes_1AL_1161A0356		123055367	LOC123055367	XP_044335302.1	lipase-like			BRADI_2g25570v3	hypothetical protein		Os05g0408300		Similar to Lipase		AT1G10740		Alpha/beta-Hydrolases superfamily protein [Source:UniProtKB/TrEMBL;Acc:Q9SAC8]		15	midnightblue			-0.00624806	0.000323984	-0.00335017						8.15	11.1633	8.44333	12.7733	6.30667	19.1433	2.19667	12.1267	0.370068	0.391201	1.42117	2.08146	0.0684245	1.00894	0.0472919
TraesCS1A03G0657000	TraesCS1A02G255800	TraesCS1A01G255800	TRIAE_CS42_1AL_TGACv1_004824_AA0054220	Traes_1AL_37E52E57D	Ta.3366.1.S1_at	123055375	LOC123055375	XP_044335305.1	1-deoxy-D-xylulose-5-phosphate synthase 1, chloroplastic			BRADI_2g25550v3	Similar to 1-deoxy-D-xylulose-5-phosphate synthase [Source: Projected from Oryza sativa (Os05g0408900)]		Os05g0408900	CLA1	Similar to 1-deoxy-D-xylulose-5-phosphate synthase		AT4G15560	DXS	DXS1 [Source:UniProtKB/TrEMBL;Acc:A0A178V5I0]		10	purple			-0.00543907	0.00671113	-0.000318998						1.56333	18.74	11.28	14.89	8.1	17.6867	11.2367	16.3333	3.51775	0.196128	1.37847	-0.117166	-0.460287	0.705481	2.86133
TraesCS1A03G0659500	TraesCS1A02G257000	TraesCS1A01G257000	TRIAE_CS42_1AL_TGACv1_003210_AA0048710	Traes_1AL_3BE18A46A		123146094	LOC123146094	XP_044421648.1	probable carboxylesterase 15						Os05g0410200	Hsr203j	Alpha/beta hydrolase fold-3 domain containing protein						3	brown	800		-0.00562584	-0.00273947	0.00473469						0.29	1.72667	0.57	1.21	0.286667	0.483333	0.0733333	2.75	2.70627	0.96121	1.10239	5.41736	-0.460949	-2.51715	1.28411
TraesCS1A03G0660400	TraesCS1A02G257400	TraesCS1A01G257400	TRIAE_CS42_1AL_TGACv1_000398_AA0011110	Traes_1AL_C4A75551B		123055525	LOC123055525	XP_044335453.1	protein NRT1/ PTR FAMILY 3.1-like			BRADI_2g25460v3	hypothetical protein		Os05g0410500		TGF-beta receptor, type I/II extracellular region family protein						1	turquoise	536		-0.00509912	0.0239522	-0.0154003						0.17	0.136667	0.0633333	0.87	0.16	51.22	0.133333	0.18	-0.653792	2.49806	7.80004	-0.318691	2.52713	8.44982	-0.62472
TraesCS1A03G0660500	TraesCS1A02G257500	TraesCS1A01G257500	TRIAE_CS42_1AL_TGACv1_000398_AA0011100		TaAffx.83489.1.S1_at	123146182	LOC123146182	XP_044421743.1	probable carboxylesterase 15			BRADI_2g25470v3	hypothetical protein										24	darkgrey			0.000210556	-0.00702857	0.00324957						3.35	2.15	5.30333	1.03667	2.01667	1.28333	0.433333	3.17	-1.05442	-2.17491	-1.14957	1.35224	-0.845245	-1.04916	0.275244
TraesCS1A03G0663300	TraesCS1A02G259100	TraesCS1A01G259100			Ta.22938.1.S1_at	123055776	LOC123055776	XP_044335576.1	uncharacterized protein LOC123055776														42	lightcyan1			0.00690477	-0.00984903	0.000789942						8.38	1.90667	6.52	0.5	2.28333	0.723333	2.57333	1.04333	-2.50203	-2.49117	-1.75439	-0.497163	-0.139472	-0.667096	-0.150329
TraesCS1A03G0664000	TraesCS1A02G259500	TraesCS1A01G259500	TRIAE_CS42_1AL_TGACv1_000165_AA0005190	Traes_1AL_11CA0CD021	TaAffx.37354.1.S1_at	123055914	LOC123055914	XP_044335662.1	putative disease resistance protein RGA4			BRADI_2g25327v3	hypothetical protein		Os05g0414200		NB-ARC domain containing protein						6	red			-0.00353089	-0.00888624	0.0048815						3.52333	3.9	2.12667	2.69333	1.69667	0.8	0.65	4.43	0.0108403	0.0392768	-0.981536	2.18157	-0.74196	-1.92672	-0.770396
TraesCS1A03G0664300	TraesCS1A02G259700	TraesCS1A01G259700	TRIAE_CS42_1AL_TGACv1_000165_AA0005220	Traes_1AL_C4F9F792D	Ta.1381.1.S1_x_at	123055942	LOC123055942	XP_044335677.1	uncharacterized protein LOC123055942 isoform X1			BRADI_2g30370v3	hypothetical protein		Os05g0337400		Similar to heavy-metal-associated domain-containing protein		AT5G14910		AT5g14910/F2G14_30 [Source:UniProtKB/TrEMBL;Acc:Q93VK7]		1	turquoise			0.00658926	0.00832947	-0.00503562						41.5	27.85	43.9967	14.1467	40.1033	145.73	77.21	14.7267	-0.778537	-1.92867	2.0286	-2.86451	-1.17833	3.99724	-0.0281917
TraesCS1A03G0664700	TraesCS1A02G259900	TraesCS1A01G259900	TRIAE_CS42_U_TGACv1_641144_AA2086600			123055982	LOC123055982	XP_044335705.1	G-type lectin S-receptor-like serine/threonine-protein kinase At2g19130			BRADI_2g25280v3	hypothetical protein		Os01g0890200		Similar to S-domain class receptor-like kinase3						34	darkmagenta	25		-0.00759501	0.00169241	0.00286632						0.283333	1.29667	0.226667	2.75333	0.486667	1.63333	0.126667	3.66333	2.3878	3.17624	1.83693	3.89447	0.60384	-0.827844	-0.184605
TraesCS1A03G0667200	TraesCS1A02G260700	TraesCS1A01G260700	TRIAE_CS42_1AL_TGACv1_000247_AA0007250		Ta.20875.2.S1_a_at	123146583	LOC123146583	XP_044422032.1	uncharacterized protein LOC123146583			BRADI_2g25227v3	hypothetical protein		Os05g0417600		Conserved hypothetical protein						13	salmon			0.00700952	0.00481014	-0.00165859						1.86667	0.56	6.47667	1.13333	3.36667	2.93	7.00333	1.5	-1.59992	-3.00522	-0.213901	-2.90016	0.309957	1.62923	1.71525
TraesCS1A03G0668200	TraesCS1A02G261400	TraesCS1A01G261400	TRIAE_CS42_1AL_TGACv1_001714_AA0034230	Traes_1AL_EF7E5EF10	Ta.8893.1.S1_at	123056164	LOC123056164	XP_044335807.1	MLO-like protein 1			BRADI_2g25190v3	hypothetical protein		Os01g0888600	OsMLO5	Similar to Seven transmembrane protein Mlo5 (Fragment)		AT4G02600	MLO1	MLO-like protein 1 [Source:UniProtKB/Swiss-Prot;Acc:O49621]		12	tan	316		-0.0134097	-0.00693985	-0.00206189						4.33333	19.2467	4.76667	25.9967	1.92333	5.98	1.21333	21.9767	1.88312	2.03863	1.53941	3.6999	0.180436	-1.39486	0.0249315
TraesCS1A03G0671500	TraesCS1A02G263300	TraesCS1A01G263300	TRIAE_CS42_1AL_TGACv1_000671_AA0016810	Traes_1AL_45A9AD1EA	Ta.20788.1.S1_at	123056447	LOC123056447	XP_044335852.1	cytochrome c										AT1G22840	CYTC-1	CYTC-1 [Source:UniProtKB/TrEMBL;Acc:A0A178W284]		9	magenta	129		-0.00674201	0.000133822	-0.00176113						52.6133	82.2433	42.05	80.6133	23.5	88.4333	33.6367	96.8467	0.511107	0.677328	2.00934	0.943989	-0.258943	0.685271	-0.425165
TraesCS1A03G0672600	TraesCS1A02G263900	TraesCS1A01G263900	TRIAE_CS42_1AL_TGACv1_002646_AA0044230	Traes_1AL_1C66B5A24		123056567	LOC123056567	XP_044335861.1	pectinesterase-like			BRADI_2g11850v3	hypothetical protein		Os01g0311800	OsPME2	Similar to Pectin methylesterase 8 (Fragment)		AT4G02330	PME41	Probable pectinesterase/pectinesterase inhibitor 41 [Source:UniProtKB/Swiss-Prot;Acc:Q8RXK7]		34	darkmagenta	5		-0.00710647	0.00130185	0.00490486						0.0166667	0.543333	0	1.67667	0	0.623333	0.0233333	3.33	3.358	7.84965	6.54089	8.46519	1.65781	-2.05532	-2.83389
TraesCS1A03G0674900	TraesCS1A02G265200	TraesCS1A01G265200	TRIAE_CS42_1AL_TGACv1_000237_AA0006940	Traes_1AL_039C1D96D	Ta.10768.1.A1_at	123147800	LOC123147800	XP_044423080.1	bidirectional sugar transporter SWEET1b-like			BRADI_2g24850v3	hypothetical protein		Os05g0426000	OsSWEET1b	MtN3 and saliva related transmembrane protein family protein						41	lightsteelblue1			-0.00308861	-0.00837081	0.00938862						3.23667	3.51667	1.38667	1.27667	0.963333	0.406667	0.826667	4.87333	-0.15702	-0.897155	-1.83031	1.95549	-1.66045	-3.04518	-0.920318
TraesCS1A03G0676100	TraesCS1A02G265600	TraesCS1A01G265600	TRIAE_CS42_1AL_TGACv1_000490_AA0013370	Traes_1AL_D1AF9EF20		123056724	LOC123056724	XP_044335954.1	uncharacterized protein LOC123056724														1	turquoise	337		0.00178796	0.0141719	-0.023925						31.94	3.45333	10.5733	12.4567	6.28	151.187	7.16667	2.22333	-3.34363	-0.0348182	4.56422	-2.11912	1.54147	6.63893	-1.76734
TraesCS1A03G0676300	TraesCS1A02G265700	TraesCS1A01G265700	TRIAE_CS42_1AL_TGACv1_000490_AA0013360	Traes_1AL_326B4C863	Ta.105.1.S1_at	123056734	LOC123056734	XP_044335960.1	uncharacterized protein LOC123056734														20	royalblue			0.00820945	-0.00737862	-0.00234358						9.73333	0.693333	2.65	0	1.40333	0.65	1.60667	0	-4.02409	-6.30094	-1.75459	-5.49511	-4.18864	3.52925	-1.91178
TraesCS1A03G0676500	TraesCS1A02G265900	TraesCS1A01G265900	TRIAE_CS42_1AL_TGACv1_000490_AA0013350		Ta.5024.1.S1_x_at	123056755	LOC123056755	XP_044335974.1	uncharacterized protein LOC123056755			BRADI_2g24820v3	hypothetical protein										7	black	7		0.0178499	-0.00621517	-0.000247575						24.6067	0.22	7.96	0	5.09333	0.743333	14.5767	0	-7.82785	-8.19944	-2.74432	-9.67575	-2.06158	5.60025	-1.68996
TraesCS1A03G0676700	TraesCS1A02G266000	TraesCS1A01G266000	TRIAE_CS42_1AL_TGACv1_000783_AA0019040	Traes_1AL_ADC801BEB	Ta.7740.1.A1_at	123056765	LOC123056765	XP_044335979.1	phospholipase A1-II 7-like														17	grey60	38		-0.00365544	-0.00548033	-0.00322623						0.226667	5.76667	0.456667	0.303333	0.1	0.563333	0.13	0.183333	4.40325	-1.51911	1.78845	0.904617	-4.9721	1.56191	0.950261
TraesCS1A03G0679900	TraesCS1A02G267600	TraesCS1A01G267600	TRIAE_CS42_1AL_TGACv1_002027_AA0037980	Traes_1AL_EDC40742C		123056882	LOC123056882	XP_044336055.1	dnaJ protein homolog 1-like			BRADI_2g24680v3	hypothetical protein										45	darkorange2			0.00467064	0.00286182	0.000808473						0.863333	0.75	1.06	0.183333	1.34	0.953333	3.23333	0.306667	-0.273462	-2.25811	-0.420462	-3.72518	-1.67038	1.82748	0.314271
TraesCS1A03G0681800	TraesCS1A02G268600	TraesCS1A01G268600	TRIAE_CS42_1AL_TGACv1_002236_AA0039950			123056985	LOC123056985	XP_044336115.1	carboxymethylenebutenolidase homolog isoform X1			BRADI_2g24420v3	hypothetical protein		Os05g0429500		Similar to dienelactone hydrolase family protein		AT1G35420		Alpha/beta-Hydrolases superfamily protein [Source:UniProtKB/TrEMBL;Acc:F4HYC8]		45	darkorange2			0.0078408	0.00305695	0.00471573						49.62	22.44	64.9233	20.56	69.2767	38.63	112.793	34.0167	-1.4155	-1.82743	-0.638219	-2.24127	-0.143781	0.936878	0.268157
TraesCS1A03G0683200	TraesCS1A02G269400	TraesCS1A01G269400	TRIAE_CS42_1AL_TGACv1_000964_AA0022780																				7	black	6		0.00593141	-0.00673611	0.011984						6.54333	3.32	5.48	1.56667	6.98333	0.6	6.91667	4.61	-0.878493	-1.66522	-3.65081	-1.17845	-1.01183	-2.36646	-0.225105
TraesCS1A03G0685700	TraesCS1A02G270900	TraesCS1A01G270900	TRIAE_CS42_1AL_TGACv1_000439_AA0012150	Traes_1AL_9912FD7F9	TaAffx.110250.3.S1_at	123148923	LOC123148923	XP_044424407.1	uncharacterized protein LOC123148923			BRADI_2g24240v3	hypothetical protein										6	red	166		-0.0161256	-0.0116832	-0.000314336						71.4033	177.453	52.0967	108.677	10.7133	65.77	3.99667	209.29	1.00418	0.881432	2.53095	5.39058	-0.844306	-1.071	-0.72156
TraesCS1A03G0685800	TraesCS1A02G271000	TraesCS1A01G271000	TRIAE_CS42_1AL_TGACv1_000439_AA0012150	Traes_1AL_9912FD7F9		123149001	LOC123149001	XP_044424496.1	basic salivary proline-rich protein 1-like						Os05g0434800		Protein of unknown function DUF1218 domain containing protein						6	red	925		-0.00711696	-0.00269606	0.00547077						0.04	1.96667	0.03	1.3	0	0.246667	0.04	2.77667	5.18566	4.35044	4.67945	6.62075	-1.43791	-3.0341	-0.602718
TraesCS1A03G0686900	TraesCS1A02G271700	TraesCS1A01G271700	TRIAE_CS42_1AL_TGACv1_001016_AA0023570		Ta.1595.1.S1_at	123057209	LOC123057209	XP_044336241.1	uncharacterized protein LOC123057209						Os05g0435300		Protein of unknown function DUF1218 domain containing protein						9	magenta	32		-0.00757653	0.000779423	0.00239549						11.4733	17.17	7.66667	15.32	5.15	21.5933	4.42667	25.84	0.427045	0.875292	1.93808	2.15406	-0.253322	0.285772	-0.701569
TraesCS1A03G0691100	TraesCS1A02G273400	TraesCS1A01G273400	TRIAE_CS42_1AL_TGACv1_004538_AA0053810	Traes_1AL_8B398A30A		123057691	LOC123057691	XP_044336548.1	sm-like protein LSM3A										AT1G21190	LSM3A	Sm-like protein LSM3A [Source:UniProtKB/Swiss-Prot;Acc:Q9LMN4]		1	turquoise	541		-0.0024232	0.00697677	-0.00725062						8.85	10.9667	10.53	13.5867	6.35	37.17	11.88	10.6067	0.230392	-0.174923	2.5679	-0.632805	0.0336085	2.51074	0.438924
TraesCS1A03G0691200	TraesCS1A02G273500	TraesCS1A01G273500	TRIAE_CS42_1AL_TGACv1_004538_AA0053800	Traes_1AL_3CB7070FF		123057557	LOC123057557	XP_044336441.1	soluble inorganic pyrophosphatase-like			BRADI_2g24100v3	hypothetical protein		Os05g0438500		Similar to Soluble inorganic pyrophosphatase (EC 3.6.1.1) (Pyrophosphate phospho- hydrolase) (PPase)		AT4G01480	PPA5	PPa5 [Source:UniProtKB/TrEMBL;Acc:A0A178V127]		3	brown	326		-0.00477269	-0.00671859	0.0062509						1.58333	3.95667	1.86333	2.00667	0.666667	0.653333	1.00667	5.18333	0.996184	0.196471	-0.263601	2.0381	-0.581046	-2.41083	0.218666
TraesCS1A03G0691300	TraesCS1A02G273600	TraesCS1A01G273600	TRIAE_CS42_1AL_TGACv1_004538_AA0053790	Traes_1AL_7102952DA		123057699	LOC123057699	XP_044336555.1	cysteine-rich receptor-like protein kinase 10			BRADI_1g12377v3	hypothetical protein		Os05g0493100		Similar to KI domain interacting kinase 1						2	blue			-0.00291483	-0.00309165	0.00643386						2.03667	1.73667	1.4	0.52	0.706667	1.48	0.246667	3.3	-0.173817	-1.79057	1.04753	3.70169	-1.96784	-0.695226	-0.351083
TraesCS1A03G0692100	TraesCS1A02G273900	TraesCS1A01G273900	TRIAE_CS42_1AL_TGACv1_001137_AA0025700	Traes_1AL_DA0EE1337	Ta.1166.3.S1_at	123057722	LOC123057722	XP_044336571.1	fructose-1,6-bisphosphatase, cytosolic-like			BRADI_2g24090v3	hypothetical protein										35	sienna3	72		-0.0155311	-0.00175739	-0.00451674						5.73667	39.1133	4.02667	31.8467	2.17333	22.9433	2.45333	26.8467	2.66073	2.59674	3.11533	3.13089	-0.569525	0.125148	-0.505538
TraesCS1A03G0696200	TraesCS1A02G275900	TraesCS1A01G275900	TRIAE_CS42_1AL_TGACv1_002630_AA0043970	Traes_1AL_C76BCC7EC		123150995	LOC123150995	XP_044426751.1	NAC domain-containing protein 90-like			BRADI_2g23967v3	hypothetical protein										4	yellow	66		-0.0100202	0.00372296	0.00993225						0.0666667	1.03	0	1.82667	0	1.62667	0.0766667	8.64	4.3286	5.17399	5.46265	7.39569	0.825268	-1.64671	-0.0201419
TraesCS1A03G0697800	TraesCS1A02G276200	TraesCS1A01G276200	TRIAE_CS42_1AL_TGACv1_000815_AA0019680			123057893	LOC123057893	XP_044336704.1	glucan endo-1,3-beta-glucosidase 14-like			BRADI_2g23940v3	hypothetical protein										9	magenta	178		-0.0126475	0.00212771	0.00124159						0.48	4.27667	0.35	4.02333	0.0533333	4.54667	0	7	3.08441	3.85273	6.7413	8.08814	0.133273	0.220442	-0.635054
TraesCS1A03G0700800	TraesCS1A02G277400	TraesCS1A01G277400			TaAffx.105598.1.S1_at	123058066	LOC123058066	XP_044336834.1	cytochrome P450 94C1-like			BRADI_2g23837v3	hypothetical protein		Os05g0445100	OsCYP450	Cytochrome P450 family protein						21	darkred			0.00709827	0.0088897	0.00340114						2.14	0.61	1.50333	0.0866667	3.32	3.73	6.69333	0.833333	-2.10012	-2.39136	0.381887	-3.73462	-0.965458	2.99726	-0.674208
TraesCS1A03G0701700	TraesCS1A02G278000	TraesCS1A01G278000	TRIAE_CS42_1AL_TGACv1_000403_AA0011210	Traes_1AL_5F65C4004	Ta.7331.1.S1_at	123058129	LOC123058129	XP_044336900.1	protein ROS1C-like isoform X2			BRADI_2g23797v3	hypothetical protein		Os05g0445900	ROS1c	5-methylcytosine DNA glycosylase/lyase, Demethylation of retrotransposon Tos17, Promotion of Tos17 transposition, Seed developmen						8	pink	4		0.00555939	-0.00186468	-0.00381502						4.91	2.00667	6.69333	2.19667	4.27	2.84333	5.14667	1.33333	-1.43787	-2.03706	-0.683752	-2.4167	-0.17462	1.49228	0.424571
TraesCS1A03G0702300	TraesCS1A02G278200	TraesCS1A01G278200	TRIAE_CS42_1AL_TGACv1_001450_AA0030730	Traes_1AL_685F7409E	TaAffx.2027.1.A1_at	123058188	LOC123058188	XP_044336936.1	uncharacterized protein LOC123058188 isoform X2			BRADI_2g23780v3	hypothetical protein		Os05g0446900		Glycoside hydrolase, carbohydrate-binding domain containing protein						18	lightgreen			-0.00486719	0.00128811	-0.0112966						1.31667	2.90333	3.33	8.35667	1.1	4.89333	1.48333	2.43	0.884438	0.885728	2.21373	0.253351	1.06563	1.27593	1.06434
TraesCS1A03G0703100	TraesCS1A02G278600	TraesCS1A01G278600	TRIAE_CS42_1AL_TGACv1_002063_AA0038300	Traes_1AL_72B74D033		123058273	LOC123058273	XP_044336987.1	uncharacterized protein LOC123058273			BRADI_2g23750v3	hypothetical protein		Os05g0447700		Tetratricopeptide-like helical domain containing protein						31	paleturquoise			0.00424982	-0.00912611	0.0112363						115.28	69.6533	80.1367	36.5933	83.8833	22.6033	98.48	83.2133	-0.852471	-1.30541	-2.025	-0.786715	-1.08941	-1.45105	-0.636467
TraesCS1A03G0703300	TraesCS1A02G278800	TraesCS1A01G278800	TRIAE_CS42_1AL_TGACv1_000300_AA0008300		Ta.25383.1.A1_at	123058293	LOC123058293	XP_044336999.1	uncharacterized acetyltransferase At3g50280-like			BRADI_2g23740v3	hypothetical protein		Os05g0449200		Transferase family protein						41	lightsteelblue1			-0.00307435	-0.0128946	0.0163444						34.3533	25.9633	12.4533	5.37	10.7467	5.76333	4.02667	38.1	-0.551132	-1.31394	-1.02104	2.52434	-2.45918	-2.21535	-1.69637
TraesCS1A03G0706000	TraesCS1A02G279500	TraesCS1A01G279500	TRIAE_CS42_1AL_TGACv1_002853_AA0045580	Traes_1AL_4B7636BC9	TaAffx.112378.2.S1_x_at	123058397	LOC123058397	XP_044337067.1	protein LSD1			BRADI_3g16400v3	hypothetical protein		Os08g0159500	OsLSD1	Similar to Zinc-finger protein Lsd1		AT1G32540	LOL1	lsd one like 1 [Source:TAIR;Acc:AT1G32540]		21	darkred			0.00452744	0.00306092	-0.00688372						32.6	40.0867	75.8	21.9233	40.57	62.76	57.12	17.63	0.255384	-1.96712	0.468929	-2.27144	-1.08761	2.13923	1.1349
TraesCS1A03G0706600	TraesCS1A02G279900	TraesCS1A01G279900	TRIAE_CS42_1AL_TGACv1_001135_AA0025650	Traes_1AL_889F7B91A		123151962	LOC123151962	XP_044427541.1	immediate early response 3-interacting protein 1-like														37	skyblue3			0.00292642	-0.00606878	0.00587652						2.78	1.49667	2.86	0.98	2.58333	0.406667	1.45	1.83667	-1.05338	-1.45041	-2.31713	-0.495043	-0.232606	-1.60443	0.164432
TraesCS1A03G0709000	TraesCS1A02G281000	TraesCS1A01G281000	TRIAE_CS42_1AL_TGACv1_001928_AA0036910	Traes_1AL_480E5DC12		123058603	LOC123058603	XP_044337254.1	uncharacterized protein LOC123058603 isoform X1			BRADI_2g23540v3	hypothetical protein		Os05g0454500		Conserved hypothetical protein						30	steelblue	1		0.0164112	-0.0175391	0.0214148						452.673	117.063	130.17	10.21	378.747	8.43333	234.53	46.09	-2.08433	-3.9267	-5.63227	-2.98368	-3.73927	-1.9387	-1.8969
TraesCS1A03G0711800	TraesCS1A02G281700	TraesCS1A01G281700	TRIAE_CS42_1AL_TGACv1_001146_AA0025940	Traes_1AL_0FB80B128		123058690	LOC123058690	XP_044337330.1	uracil phosphoribosyltransferase-like			BRADI_2g23490v3	hypothetical protein		Os05g0455700		Phosphoribosyltransferase domain containing protein		AT3G53900	UPP	Uracil phosphoribosyltransferase, chloroplastic [Source:UniProtKB/Swiss-Prot;Acc:Q9M336]		8	pink	16		0.00846523	-0.00623537	-0.00412339						14.5633	4.79333	16.2067	3.61	9.69667	4.07	9.76333	1.99667	-1.58446	-2.70273	-1.3878	-2.60842	-0.996558	1.16826	0.121712
TraesCS1A03G0713100	TraesCS1A02G282600	TraesCS1A01G282600	TRIAE_CS42_1AL_TGACv1_001352_AA0029180	Traes_1AL_7D7864504	Ta.332.2.A1_x_at	123058749	LOC123058749	XP_044337378.1	aldo-keto reductase family 4 member C10-like						Os05g0456300	AKR4C15	Aldose reductase						4	yellow			-0.00745498	0.0139742	0.017387						0	0	0	0	0.223333	5.62333	0.416667	12.5667	-0.936359	0	5.03554	4.91337	0	-0.96002	-0.997584
TraesCS1A03G0713900	TraesCS1A02G282800	TraesCS1A01G282800	TRIAE_CS42_1AL_TGACv1_002908_AA0046230	Traes_1AL_F6ABF5344		123152313	LOC123152313	XP_044427855.1	uncharacterized protein LOC123152313			BRADI_2g23445v3	hypothetical protein		Os05g0456900		Conserved hypothetical protein		AT5G02090		Uncharacterized protein At5g02090/T7H20_140 [Source:UniProtKB/TrEMBL;Acc:Q9LZM2]		27	white			0.0036768	-0.00507395	0.0033551						1.59	0.77	2.51667	0.433333	1.25333	0	1.87333	1.06667	-0.732022	-2.23477	-5.03298	-1.85122	-1.56464	-4.26275	-0.0618906
TraesCS1A03G0717000	TraesCS1A02G284000	TraesCS1A01G284000			TaAffx.80580.1.S1_x_at	123058964	LOC123058964	XP_044337567.1	transcription factor MYB3R-2-like isoform X1			BRADI_2g23320v3	hypothetical protein		Os05g0459000		Similar to Gag/env/c-myb protein (Fragment)						40	mediumpurple3			-0.00768506	-0.00436063	-0.00563833						2.78333	7.87333	1.93667	9.56	1.75333	3.56	0.843333	4.05667	1.37475	2.20376	1.06197	1.8412	0.209232	0.0856776	-0.619778
TraesCS1A03G0718300	TraesCS1A02G284800	TraesCS1A01G284800	TRIAE_CS42_1AL_TGACv1_005630_AA0054910	Traes_1AL_D39C4F23A								BRADI_2g23260v3	hypothetical protein										14	cyan	2		-0.00312698	0.0100034	-0.0150253						16.2733	12.9833	36.1333	113.557	19.8533	112.05	24.67	24.5033	-0.418551	-0.145641	2.52994	-0.55501	1.06068	2.61499	0.787775
TraesCS1A03G0718400	TraesCS1A02G284900	TraesCS1A01G284900	TRIAE_CS42_1AL_TGACv1_002910_AA0046270	Traes_1AL_1BFD68AB8	Ta.22678.1.A1_a_at	123059084	LOC123059084	XP_044337664.1	chitinase 1-like			BRADI_3g26840v3	hypothetical protein		Os10g0416800	Oschib2	Similar to Chitinase 2 (EC 3.2.1.14) (Tulip bulb chitinase-2) (TBC-2)						8	pink	1		0.00890204	0.000974276	0.000945604						7.13667	0.966667	9.05	0.576667	5.02667	3.83	6.17333	1.78667	-2.91509	-3.5697	-0.469809	-2.44634	-0.378549	1.68047	0.276067
TraesCS1A03G0718600	TraesCS1A02G285000	TraesCS1A01G285000	TRIAE_CS42_1AL_TGACv1_002910_AA0046290	Traes_1AL_51CED3DBF	Ta.15522.2.S1_x_at	123059094	LOC123059094	XP_044337674.1	heat shock 70 kDa protein 4-like			BRADI_2g23250v3	hypothetical protein		Os01g0840100	OsMed37_1	Heat shock protein Hsp70 family protein		AT3G12580	MED37C	Probable mediator of RNA polymerase II transcription subunit 37c [Source:UniProtKB/Swiss-Prot;Acc:Q9LHA8]		3	brown			-0.00226086	-0.00675026	0.00782173						4.16667	7.3	4.97	3.14	2.59333	1.61667	3.60333	9.33667	0.705823	-0.804469	-0.601409	1.01588	-1.19354	-2.08392	0.316751
TraesCS1A03G0720000	TraesCS1A02G285900	TraesCS1A01G285900	TRIAE_CS42_1AL_TGACv1_002580_AA0043300			123152593	LOC123152593	XP_044428061.1	zinc finger protein 775-like														1	turquoise	818		-0.0103032	0.0179293	-0.00879077						0	0.223333	0	4.42667	0	19.4433	0	2.91667	4.115	8.70847	9.7954	5.45844	4.55772	3.33262	0
TraesCS1A03G0720100	TraesCS1A02G286000	TraesCS1A01G286000	TRIAE_CS42_1AL_TGACv1_002580_AA0043310	Traes_1AL_247316C21	Ta.2957.1.S1_at	123059189	LOC123059189	XP_044337751.1	coatomer subunit zeta-1-like			BRADI_2g23150v3	hypothetical protein		Os05g0461000		Clathrin adaptor, sigma subunit/coatomer, zeta subunit domain containing protein						9	magenta	179		-0.00594579	7.00673e-05	-0.000804425						9.9	15.92	8.06333	15.4533	5.29	16.5933	6.22333	18.3833	0.439752	0.915224	2.05414	0.95884	-0.0612737	0.71206	-0.536747
TraesCS1A03G0721800	TraesCS1A02G287000	TraesCS1A01G287000	TRIAE_CS42_1AL_TGACv1_001252_AA0027800	Traes_1AL_2644AE508		123153378	LOC123153378	XP_044428485.1	uncharacterized protein LOC123153378			BRADI_2g23080v3	hypothetical protein										11	greenyellow	62		-0.00888366	0.00584532	-0.00818166						2.07667	5.86333	6.54333	8.59333	0.943333	23.0933	1.59667	9.67333	1.04959	0.417517	5.1348	2.16777	0.718407	2.00168	1.35048
TraesCS1A03G0726600	TraesCS1A02G289300	TraesCS1A01G289300	TRIAE_CS42_1AL_TGACv1_004589_AA0053925	Traes_1AL_1B67D1299	Ta.20385.1.S1_x_at	123154113	LOC123154113	XP_044428868.1	uncharacterized protein LOC123154113			BRADI_2g22880v3	hypothetical protein		Os05g0465000		Conserved hypothetical protein						20	royalblue			0.00347079	-0.0158063	-0.0128396						36.4033	7.63333	8.44	19.9033	13.8033	2.48	2.69	1.41333	-2.51841	0.0683414	-2.81554	-2.40966	0.544231	1.37143	-2.04252
TraesCS1A03G0727200	TraesCS1A02G289600	TraesCS1A01G289600	TRIAE_CS42_1AL_TGACv1_000149_AA0004760	Traes_1AL_0BC22EBC4																			7	black			0.00914784	0.00228137	0.0149457						19.9967	3.94333	13.5133	0	15.28	9.15667	6.29	8.89667	-1.90118	-0.481368	-2.48702	-1.47043	-0.442351	0.0575579	-1.86216
TraesCS1A03G0727300	TraesCS1A02G289700	TraesCS1A01G289700	TRIAE_CS42_1AL_TGACv1_000149_AA0004760	Traes_1AL_0BC22EBC4																			36	yellowgreen			-0.00553985	-0.0135679	-0.0110237						3.72667	8.62	0	8.20667	0	0	0	0	1.93574	2.70874	0.699055	1.62224	-1.86481	1.42383	-2.63782
TraesCS1A03G0727400	TraesCS1A02G289800	TraesCS1A01G289800																					30	steelblue			-0.00366939	-0.000361074	0.0015423						65.94	7.27	1.43333	5.35667	7.57333	41.2667	0	11.4067	-2.97314	0.936174	1.69863	2.60456	-1.04185	3.6118	-4.95117
TraesCS1A03G0727700	TraesCS1A02G289900	TraesCS1A01G289900	TRIAE_CS42_1AL_TGACv1_000149_AA0004730		Ta.30935.1.S1_at																		30	steelblue			-0.0028427	0.000445864	0.00870696						66.0667	5.99667	0	2.17333	8.63667	29.3967	0	5.41	-2.89042	1.59311	0.941314	3.57117	-1.23706	2.62341	-5.72059
TraesCS1A03G0728000	TraesCS1A02G290100	TraesCS1A01G290100	TRIAE_CS42_1AL_TGACv1_000149_AA0004700		TaAffx.54121.1.S1_at																		20	royalblue			0.0037357	-0.00772122	0.00752911						144.043	15.5133	9.28667	4.70667	27.7767	19.7233	4.21333	11.7133	-3.29179	-1.97384	0.261082	0.886108	-2.85037	2.23199	-4.16833
TraesCS1A03G0728200	TraesCS1A02G290200	TraesCS1A01G290200	TRIAE_CS42_1AL_TGACv1_002098_AA0038710	Traes_1AL_39EEA5520	Ta.23072.1.S1_at							BRADI_2g22862v3	hypothetical protein										41	lightsteelblue1			-0.0056798	-0.00940006	0.0118638						4.28333	3.83	0.536667	0.406667	0.133333	0.586667	0	5.87667	-0.718338	1.86942	0.853177	6.98025	-2.30339	-1.92772	-4.89115
TraesCS1A03G0731100	TraesCS1A02G292200	TraesCS1A01G292200	TRIAE_CS42_1AL_TGACv1_001595_AA0032630	Traes_1AL_C49C8F4AE	Ta.6292.2.S1_a_at	100192187	LOC100192187	XP_044338106.1	calcium-dependent protein kinase 16	CPK15		BRADI_2g22750v3	hypothetical protein		Os05g0467000	OsCDPK16	Similar to Calcium-dependent protein kinase						16	lightcyan	108		-0.00570822	0.003255	-0.00500729						1.49333	2.89	1.83	4.58667	1.20333	5.67333	0.956667	3.37	0.893506	1.51373	2.6761	1.02183	0.906784	1.53514	0.286557
TraesCS1A03G0737000	TraesCS1A02G295300	TraesCS1A01G295300	TRIAE_CS42_1AL_TGACv1_000306_AA0008460	Traes_1AL_A3A29B974		123059754	LOC123059754	XP_044338181.1	ammonium transporter 2 member 1-like			BRADI_2g22670v3	Ammonium transporter 2 [Source:Projected from Arabidopsis thaliana (AT2G38290) UniProtKB/Swiss-Prot;Acc:Q9M6N7]		Os05g0468700	OsAMT2	Ammonium transporter		AT2G38290	AMT2	Ammonium transporter 2 [Source:UniProtKB/Swiss-Prot;Acc:Q9M6N7]		31	paleturquoise			-0.00175243	-0.0115954	0.0104441						32.57	20.6267	10.1867	12.9133	17.3233	5.55333	4.99333	21.73	-0.96203	0.151933	-2.10895	1.58824	-0.736588	-1.9348	-1.85055
TraesCS1A03G0737200	TraesCS1A02G295400	TraesCS1A01G295400	TRIAE_CS42_1AL_TGACv1_000306_AA0008450									BRADI_1g68190v3	hypothetical protein		Os07g0549900		Similar to Histone H4		AT5G59970		Histone H4 [Source:UniProtKB/TrEMBL;Acc:Q6NR90]		22	darkgreen			0.00111272	0.000232511	-0.00280252						1.13333	0.736667	0.98	1.78667	0.426667	0.723333	2.42	0.786667	0.241928	0.0598535	0.920966	-2.28854	0.455441	0.584544	0.637517
TraesCS1A03G0737400	TraesCS1A02G295600	TraesCS1A01G295600	TRIAE_CS42_1AL_TGACv1_003472_AA0049980		TaAffx.30389.1.S1_at	123059761	LOC123059761	XP_044338182.1	heat shock 70 kDa protein, mitochondrial-like														1	turquoise			0.00235269	0.00483097	-0.00960636						1.78	0.356667	3.91667	1.99	1.31	4.39333	1.90667	0.716667	-2.44665	-1.34513	1.62398	-1.77072	2.08428	2.93543	0.982754
TraesCS1A03G0738000	TraesCS1A02G295800	TraesCS1A01G295800	TRIAE_CS42_1AL_TGACv1_002675_AA0044370			123059798	LOC123059798	XP_044338235.1	UPF0098 protein CPn_0877/CP_0992/CPj0877/CpB0906-like			BRADI_2g22660v3	hypothetical protein		Os05g0468800		Phosphatidylethanolamine-binding protein PEBP domain containing protein		AT5G01300		PEBP (Phosphatidylethanolamine-binding protein) family protein [Source:UniProtKB/TrEMBL;Acc:Q9M042]		1	turquoise	662		-0.0127076	0.0248163	-0.0184254						0.823333	2.44667	1.85	15.5367	0.59	155.457	0.976667	5.51333	0.744704	2.85739	7.06512	2.04036	2.67996	5.47331	0.56727
TraesCS1A03G0738200	TraesCS1A02G295900	TraesCS1A01G295900	TRIAE_CS42_1AL_TGACv1_001475_AA0031050			123059803	LOC123059803	XP_044338249.1	RING-H2 finger protein ATL66-like			BRADI_2g22650v3	hypothetical protein		Os05g0468900		Zinc finger, RING/FYVE/PHD-type domain containing protein						34	darkmagenta	305		-0.0071196	-0.00257831	0.0045945						1.78	2.92333	1.25333	3.95	0.763333	1.70333	0.7	7.08667	0.651618	1.44368	1.426	3.51009	0.114553	-1.41301	-0.677507
TraesCS1A03G0739000	TraesCS1A02G296300	TraesCS1A01G296300	TRIAE_CS42_1AL_TGACv1_002004_AA0037690	Traes_1AL_7E3623F89	Ta.24562.1.A1_at	123059830	LOC123059830	XP_044338282.1	protein MALE DISCOVERER 2-like			BRADI_2g22610v3	hypothetical protein		Os05g0471000		Similar to Ser-thr protein kinase (Fragment)						41	lightsteelblue1			-0.00501209	-0.0116906	0.00596752						6.04	6.94	4.93333	3.65	1.67333	1.36333	0.87	9.69667	0.0247998	-0.670411	-0.473022	3.04862	-1.0102	-2.30567	-0.314985
TraesCS1A03G0743700	TraesCS1A02G298600	TraesCS1A01G298600	TRIAE_CS42_1AL_TGACv1_000405_AA0011280	Traes_1AL_8714A6D32		123059977	LOC123059977	XP_044338480.1	WRKY transcription factor WRKY24-like	WRKY		BRADI_2g22440v3	hypothetical protein		Os05g0474800	OsWRKY70	WRKY transcription factor 70						3	brown	124		-0.00776914	-0.00704957	0.00849198						3.53	6.66667	2.52	3.6	2.64333	2.54333	0	10.2967	0.605671	0.567207	-0.0285774	7.78915	-0.855645	-1.70863	-0.817181
TraesCS1A03G0745100	TraesCS1A02G299100	TraesCS1A01G299100	TRIAE_CS42_1AL_TGACv1_000399_AA0011160	Traes_1AL_1D8244B27	Ta.4834.1.S1_at	542824	LOC542824	XP_044338520.1	alanine--glyoxylate aminotransferase 2 homolog 3, mitochondrial			BRADI_2g22410v3	hypothetical protein		Os05g0475400	Osh36	Similar to Alanine:glyoxylate aminotransferase-like protein (Fragment)		AT3G08860	PYD4	Alanine--glyoxylate aminotransferase 2 homolog 3, mitochondrial [Source:UniProtKB/Swiss-Prot;Acc:Q9SR86]		12	tan	643		-0.0151447	0.00019973	-0.00279742						1.79667	13.3067	1.40667	14.4833	0.56	8.90667	0.81	14.7	2.97495	3.17561	4.33898	3.66944	-0.143812	-0.190144	-0.344477
TraesCS1A03G0747900	TraesCS1A02G300000	TraesCS1A01G300000	TRIAE_CS42_1AL_TGACv1_001755_AA0034720			123060085	LOC123060085	XP_044338582.1	U-box domain-containing protein 16-like			BRADI_2g22320v3	hypothetical protein		Os05g0476700	OsPUB2	U-box E3ubiquitin ligase, Positive regulation of cold stress respons						2	blue	127		-0.00576148	-0.00475672	0.0128513						3.11333	3.65	3.18	1.86333	1.15333	1.88	1.01667	15.08	0.144206	-1.00442	0.550333	3.76928	-1.07203	-2.5689	0.0765925
TraesCS1A03G0748300	TraesCS1A02G300200	TraesCS1A01G300200	TRIAE_CS42_1AL_TGACv1_001551_AA0032140			123060101	LOC123060101	XP_044338611.1	expansin-A4-like			BRADI_2g22290v3	hypothetical protein		Os05g0477600	OsEXP4	Alpha-expansin OsEXPA4		AT1G69530	ATEXPA1	Expansin [Source:UniProtKB/TrEMBL;Acc:C0Z241]		43	ivory			0.0153272	-0.00467933	-0.0018099						6.74667	2.96667	29.15	0.21	5.38	1.5	30.1433	0.833333	-1.45809	-6.71886	-1.90484	-6.25833	-3.16084	1.86807	2.09993
TraesCS1A03G0749200	TraesCS1A02G300900	TraesCS1A01G300900	TRIAE_CS42_1AL_TGACv1_002809_AA0045280			123158775	LOC123158775	XP_044432583.1	probable WRKY transcription factor 70														4	yellow	129		-0.00260294	-0.00164267	0.0100976						0.426667	0.133333	0.15	0.06	0.0233333	0	0.0433333	2.41	-1.92909	-2.92326	-1.90883	6.46	-2.32769	-7.77002	-1.33352
TraesCS1A03G0749400	TraesCS1A02G301100	TraesCS1A01G301100	TRIAE_CS42_1AL_TGACv1_001348_AA0029060		TaAffx.64818.1.S1_at	123158972	LOC123158972	XP_044432743.1	transcription factor WRKY19-like	WRKY70					Os05g0478400	OsWRKY48	Similar to WRKY transcription factor 48						4	yellow	140		-0.00512519	-0.000441538	0.0144301						0.393333	0.663333	0.926667	0.0566667	0	0.613333	0.206667	7.49	1.00768	-2.98243	2.68035	5.67047	-2.50124	-3.26722	1.48887
TraesCS1A03G0751400	TraesCS1A02G302100	TraesCS1A01G302100	TRIAE_CS42_1AL_TGACv1_007077_AA0055280		Ta.30219.1.S1_at	123060182	LOC123060182	XP_044338701.1	cytosolic sulfotransferase 13-like														28	skyblue			0.00338749	-0.00253472	-0.00285732						0.143333	0.1	2.28667	0	0.24	0	0.616667	0.0433333	-0.843862	-7.86754	-3.95693	-5.07057	-2.79622	0.246235	4.22747
TraesCS1A03G0753000	TraesCS1A02G302600	TraesCS1A01G302600	TRIAE_CS42_1AL_TGACv1_000008_AA0000170	Traes_1AL_F171CDC68	Ta.28431.1.A1_at	123060207	LOC123060207	XP_044338735.1	probable LRR receptor-like serine/threonine-protein kinase At1g06840 isoform X1			BRADI_2g22140v3	hypothetical protein		Os05g0481100		Similar to cDNA clone:J013034D11, full insert sequence						10	purple	26		-0.00430279	-0.00782544	0.00793912						3.42	9.54	2.71333	5.35333	4.77	1.36	2.04333	7.91	1.4149	0.848516	-1.95472	1.51629	-0.918838	-2.10784	-0.352449
TraesCS1A03G0753800	TraesCS1A02G303100	TraesCS1A01G303100	TRIAE_CS42_1AL_TGACv1_001123_AA0025430	Traes_1AL_1F70A2C8B		123060271	LOC123060271	XP_044338821.1	cytochrome P450 714D1-like			BRADI_2g22050v3	hypothetical protein		Os05g0482400	EUI1	Cytochrome P450 monooxygenase, Gibberellin (GA)-deactivating enzyme, Modulation of internode elongatio						3	brown	302		-0.00452909	-0.00363661	0.00927499						0.253333	1.53	0.103333	0.13	0	0.04	0.0466667	2.32667	2.49692	1.15939	2.63252	6.02471	-2.8538	-4.43848	-1.51627
TraesCS1A03G0756400	TraesCS1A02G304200	TraesCS1A01G304200	TRIAE_CS42_1AL_TGACv1_000885_AA0021070	Traes_1AL_A270BED6E	TaAffx.49749.1.S1_at	123060295	LOC123060295	XP_044338880.1	leucine-rich repeat receptor protein kinase HPCA1-like			BRADI_2g21990v3	hypothetical protein		Os05g0486100	OsRPK1	Leucine-rich repeat receptor-like kinase, Mn<sup>2+</sup>/Mg<sup>2+</sup>-dependent serine/threonine (Ser/Thr) kinase, Ca<sup>2+</sup>-independent Ser/Thr kinase, Negative regulation of polar auxin transport, Root developmen						41	lightsteelblue1			-0.00298816	-0.0109527	0.00834778						4.25	5.32	2.28667	2.40333	1.88333	0.396667	1.2	5.64667	0.276491	-0.205619	-2.2559	1.57127	-1.49642	-2.99222	-1.01431
TraesCS1A03G0761900	TraesCS1A02G306600	TraesCS1A01G306600	TRIAE_CS42_1AL_TGACv1_003749_AA0051360		Ta.29587.2.S1_x_at	123060502	LOC123060502	XP_044339189.1	chlorophyll a-b binding protein of LHCII type 1-like						Os01g0720500	Lhcb1.1	Similar to Type I chlorophyll a/b-binding protein b (Fragment)						38	plum1			0.00165163	0.00325223	0.0166381						103.797	384.897	57.4633	23.1833	574.17	211.9	53.17	93.55	1.83758	-1.50003	-1.43629	0.248404	-4.14997	1.60063	-0.812371
TraesCS1A03G0763400	TraesCS1A02G307200	TraesCS1A01G307200	TRIAE_CS42_U_TGACv1_641100_AA2085080		TaAffx.37334.1.A1_at	123060536	LOC123060536	XP_044339231.1	calcium-dependent protein kinase 1-like			BRADI_2g21790v3	hypothetical protein		Os05g0489900	DMI3	Ca/calmodulin-dependent protein kinase, Calcium/calmodulin-dependent protein kinase, Bacterial and fungal symbioses, Common symbiosis signaling (SYM) pathwa						1	turquoise	266		-0.00190759	0.00484251	-0.0034558						0.48	0.33	0.53	0.61	0.05	2.20667	0.406667	0.806667	-0.392921	0.15509	4.72895	0.547376	0.888995	2.43826	0.340984
TraesCS1A03G0764100	TraesCS1A02G307800	TraesCS1A01G307800	TRIAE_CS42_1AL_TGACv1_003433_AA0049730	Traes_1AL_17BBEACD1	Ta.6646.1.A1_at	123060551	LOC123060551	XP_044339253.1	F-box protein At5g46170-like			BRADI_2g21750v3	hypothetical protein		Os05g0490300	OsFbox265	Cyclin-like F-box domain containing protein						7	black	57		0.00572172	-0.00276288	-0.000289532			A			13.5967	4.6	7.87333	4.94667	8.03667	4.09	11.93	3.61333	-1.76196	-0.829813	-1.08521	-2.46384	0.094777	0.772353	-0.837371
TraesCS1A03G0764600	TraesCS1A02G308000	TraesCS1A01G308000	TRIAE_CS42_1AL_TGACv1_002945_AA0046610	Traes_1AL_B4D55A0CE		123060560	LOC123060560	XP_044339299.1	UV radiation resistance-associated protein-like isoform X3			BRADI_2g21728v3	hypothetical protein		Os05g0490500		Conserved hypothetical protein						16	lightcyan	53		-0.00632166	0.00538946	-0.00388305						0.23	0.516667	0.22	2.01	0	2.72	0	1.65333	1.16084	2.84761	5.09433	3.49084	1.73155	1.50685	0.0447809
TraesCS1A03G0765200	TraesCS1A02G308400	TraesCS1A01G308400	TRIAE_CS42_1AL_TGACv1_002367_AA0041260	Traes_1AL_B0EAE92EE	Ta.14393.1.S1_at	123060637	LOC123060637	XP_044339368.1	proteasome subunit alpha type-3-like			BRADI_2g21510v3	20S proteasome alpha subunit G1 [Source:Projected from Arabidopsis thaliana (AT2G27020) TAIR;Acc:AT2G27020]		Os05g0490800		Similar to Proteasome subunit alpha type						16	lightcyan	408		-0.00534963	0.00134087	-0.00265139						4.92333	8.57333	4.22333	9.58	3.50667	10.13	3.51333	8.70333	0.571541	0.939543	2.00077	0.56085	0.125549	1.08863	-0.242454
TraesCS1A03G0765700	TraesCS1A02G308700	TraesCS1A01G308700	TRIAE_CS42_1AL_TGACv1_001781_AA0035100	Traes_1AL_504CDB1731		123161324	LOC123161324	XP_044435125.1	probable calcium-binding protein CML9			BRADI_2g21470v3	hypothetical protein		Os05g0491000	OsCML9	EF-Hand type domain containing protein						8	pink	34		0.00426239	-0.00327229	-0.000627925						3.94333	1.56	3.59333	1.51	2.05667	1.23667	3.11	1.16333	-1.84704	-1.96712	-0.68761	-2.04981	-0.208175	0.789359	-0.0880952
TraesCS1A03G0765900	TraesCS1A02G308900	TraesCS1A01G308900	TRIAE_CS42_1AL_TGACv1_001781_AA0035120	Traes_1AL_47D54EF1E	Ta.26517.1.A1_at	123060657	LOC123060657	XP_044339395.1	SNF1-related protein kinase regulatory subunit beta-1-like			BRADI_2g21420v3	hypothetical protein		Os05g0491200	akin-b	Similar to SNF1 kinase complex anchoring protein (Fragment)						25	orange	8		0.011575	0.00182418	0.00847014						16.4533	1.16	7.86667	0.846667	16.8167	4.68667	10.1833	3.07333	-3.3292	-3.30282	-1.74387	-2.29375	-0.947524	1.32443	-0.973905
TraesCS1A03G0768600	TraesCS1A02G309700	TraesCS1A01G309700	TRIAE_CS42_1AL_TGACv1_003346_AA0049250	Traes_1AL_E8C262A2A	Ta.214.1.S1_x_at	543261	LOC543261	XP_044339487.1	tubulin beta-5 chain	TUB,Tubb5													20	royalblue			0.00365086	-0.00448662	-0.00485806						6.33	1.11333	4.08667	2.49667	2.09667	1.71667	2.16333	1.09333	-2.55454	-0.878199	-0.534273	-1.84181	1.02388	1.07461	-0.652469
TraesCS1A03G0770600	TraesCS1A02G310500	TraesCS1A01G310500	TRIAE_CS42_1AL_TGACv1_000089_AA0002910	Traes_1AL_A0B81FF76	TaAffx.97053.1.S1_at	123060768	LOC123060768	XP_044339541.1	cytochrome P450 98A1-like	CYP98A11		BRADI_2g21300v3	hypothetical protein		Os05g0494000	OsC3'H1	p-Coumaroyl ester 3-hydroxylase, Determination of lignin content, composition and the degree of cell wall cross-linkin		AT2G40890	CYP98A3	Cytochrome P450 98A3 [Source:UniProtKB/Swiss-Prot;Acc:O22203]		35	sienna3	56		-0.00966045	-9.89145e-05	-0.00844209						2.02333	10.1433	4.45333	12.63	1.03333	8.38333	1.59667	7.35	1.97966	1.34972	3.27205	1.86324	0.275798	0.635502	0.905733
TraesCS1A03G0770800	TraesCS1A02G310600	TraesCS1A01G310600	TRIAE_CS42_1AL_TGACv1_000089_AA0002900	Traes_1AL_3791A0A3A	Ta.10595.3.S1_s_at	123060778	LOC123060778	XP_044339549.1	aldehyde dehydrogenase family 2 member C4-like														34	darkmagenta			-0.0190463	0.00515815	0.00630024						0.176667	8.68	0.0233333	8.06333	0.15	12.1667	0.0266667	22.2533	5.49876	6.5136	5.88518	7.6836	-0.0890479	-0.535587	-1.1039
TraesCS1A03G0772000	TraesCS1A02G311100	TraesCS1A01G311100	TRIAE_CS42_1AL_TGACv1_000246_AA0007210	Traes_1AL_FF5D1E731	TaAffx.12819.1.S1_at	123060823	LOC123060823	XP_044339609.1	polygalacturonase At1g48100-like			BRADI_2g11380v3	hypothetical protein		Os01g0296200	OsPGL13	Similar to polygalacturonase		AT1G02460		At1g02460 [Source:UniProtKB/TrEMBL;Acc:Q9FWX5]		5	green			-0.00458166	-0.00889774	0.00069423						2.25667	5.88333	1.45333	3.64333	1.48667	0.633333	0.606667	2.64333	1.48309	1.17443	-1.12979	2.12777	-0.871315	-1.87532	-0.562659
TraesCS1A03G0776200	TraesCS1A02G312700	TraesCS1A01G312700	TRIAE_CS42_1AL_TGACv1_000160_AA0005070	Traes_1AL_DA243499C		123060944	LOC123060944	XP_044339741.1	putative glucan endo-1,3-beta-glucosidase GVI isoform X1			BRADI_2g21142v3	hypothetical protein		Os05g0495900	Gns8	Similar to Beta-1,3-glucanase precursor (Fragment)						9	magenta	114		-0.0243166	0.00932186	-0.00257042						1.21667	40.7633	3.47333	94.3833	2.16333	70.2767	2.46	110.32	4.73851	4.50561	4.68367	4.98567	0.962607	-0.330093	1.1955
TraesCS1A03G0776300	TraesCS1A02G312800	TraesCS1A01G312800	TRIAE_CS42_1AL_TGACv1_000160_AA0005080	Traes_1AL_492E5A536	Ta.8171.1.A1_at	123060953	LOC123060953	XP_044339753.1	uncharacterized protein LOC123060953			BRADI_2g21136v3	hypothetical protein		Os05g0496000		Conserved hypothetical protein		AT5G04000		unknown protein; Ha. [Source:TAIR;Acc:AT5G04000]		16	lightcyan	51		-0.00774429	0.00315864	-0.00710474						1.71333	3.72667	1.09667	4.78667	0.17	6.64667	1.05	3.26333	0.726263	1.38585	4.41876	1.14006	0.216977	2.00412	-0.442615
TraesCS1A03G0778800	TraesCS1A02G313400	TraesCS1A01G313400	TRIAE_CS42_1AL_TGACv1_002632_AA0044020	Traes_1AL_6F9D822D0		123060999	LOC123060999	XP_044339816.1	uncharacterized protein LOC123060999			BRADI_1g16160v3	hypothetical protein		Os07g0423000		Mitochodrial transcription termination factor-related family protein						8	pink	35		0.00433543	-0.00182666	-0.00221898						1.86	0.543333	2.33	0.566667	1.17333	0.703333	1.91333	0.45	-2.28563	-2.42072	-1.05461	-2.49505	-0.0606449	1.22687	0.0744542
TraesCS1A03G0781300	TraesCS1A02G314500	TraesCS1A01G314500			Ta.18362.1.A1_at	123163678	LOC123163678	XP_044436996.1	high molecular mass early light-inducible protein HV58, chloroplastic-like														46	brown4	1		-0.0184944	0.0292177	0.0160957						0	1.19	0	3.40667	0.49	104.683	0.43	73.6333	3.8131	6.49386	7.52137	5.9918	1.68322	1.20556	-0.997603
TraesCS1A03G0781500	TraesCS1A02G314600	TraesCS1A01G314600	TRIAE_CS42_1AL_TGACv1_004970_AA0054390	Traes_1AL_5830C381D	Ta.18362.1.A1_at	123163754	LOC123163754	XP_044437101.1	high molecular mass early light-inducible protein HV58, chloroplastic-like														15	midnightblue	159		-0.0215136	0.0179442	-0.00526			B			0.78	5.49333	0.386667	23.4133	0.22	72.2	0.18	30.5933	1.90227	5.33449	6.4681	3.24448	1.4744	3.0926	-1.95786
TraesCS1A03G0781700	TraesCS1A02G314800	TraesCS1A01G314800	TRIAE_CS42_1AL_TGACv1_000172_AA0005300	Traes_1AL_06FED2723		123163846	LOC123163846	XP_044437202.1	high molecular mass early light-inducible protein HV58, chloroplastic-like														15	midnightblue	147		-0.017786	0.0194871	-0.000730812						0.146667	2.17667	0.0566667	12.3167	0.113333	41.3133	0.07	17.5933	4.95714	7.79483	9.28295	8.63435	1.95061	1.44682	-0.887127
TraesCS1A03G0787500	TraesCS1A02G317200	TraesCS1A01G317200	TRIAE_CS42_1AL_TGACv1_001984_AA0037460	Traes_1AL_36B201285		123061233	LOC123061233	XP_044340169.1	B2 protein-like	B2		BRADI_2g20890v3	hypothetical protein		Os05g0498700		Similar to Gda-1 protein		AT3G27090		AT3g27090/MOJ10_18 [Source:UniProtKB/TrEMBL;Acc:Q9LSC7]		30	steelblue			0.00411686	-0.00998685	0.0103692						386.043	190.04	111.777	80.72	303.79	71.44	124.193	123.413	-1.18687	-0.838845	-2.31441	-0.510977	-1.52316	-0.535452	-1.87119
TraesCS1A03G0791600	TraesCS1A02G319400	TraesCS1A01G319400	TRIAE_CS42_1AL_TGACv1_001208_AA0026990	Traes_1AL_86EFC2804		123061428	LOC123061428	XP_044340467.1	uncharacterized protein LOC123061428			BRADI_2g20790v3	hypothetical protein		Os05g0500400		Domain of unknown function DUF1995 domain containing protein						1	turquoise	320		-0.00230256	0.0101258	-0.000705194						2.36	6.11	4.81333	6.07333	5.73	19.1733	7.52	7.64333	1.26256	0.532189	2.32163	-0.435738	-0.050151	2.08856	0.68022
TraesCS1A03G0794300	TraesCS1A02G320900	TraesCS1A01G320900	TRIAE_CS42_1AL_TGACv1_004222_AA0052820	Traes_1AL_0C0DFBE2C		123061459	LOC123061459	XP_044340520.1	receptor-like serine/threonine-protein kinase SD1-8 isoform X1			BRADI_2g20687v3	hypothetical protein		Os05g0501400		Similar to Receptor-like protein kinase 5						1	turquoise	637		-0.00414078	0.00962482	-0.0103049						0.08	0.366667	0.176667	1.25333	0.05	5.19	0.0766667	0.226667	0.690416	2.13372	6.6387	0.492274	1.97994	4.79863	0.536635
TraesCS1A03G0800500	TraesCS1A02G322900	TraesCS1A01G322900	TRIAE_CS42_1AL_TGACv1_002903_AA0046120									BRADI_4g42828v3	hypothetical protein										5	green	237		-0.00734792	-0.00915562	0.001523						3.31333	5.97	1.88333	5.76667	1.17333	1.66667	0.373333	5.86	0.648045	1.21252	0.377131	3.17493	-0.177608	-1.25349	-0.742084
TraesCS1A03G0800700	TraesCS1A02G323000	TraesCS1A01G323000	TRIAE_CS42_1AL_TGACv1_002903_AA0046130		Ta.8744.1.A1_at																		9	magenta	468		-0.00904206	0.00116645	0.00129144						0.39	2.65667	0.356667	3.25333	0.32	2.39333	0.216667	4.17667	2.34012	3.16142	3.21852	4.07642	0.0433425	-0.501095	-0.777961
TraesCS1A03G0803800	TraesCS1A02G324000	TraesCS1A01G324000	TRIAE_CS42_1AL_TGACv1_002284_AA0040480	Traes_1AL_CEA78C84D	TaAffx.19033.1.S1_at	123061676	LOC123061676	XP_044340813.1	protein SULFUR DEFICIENCY-INDUCED 2-like			BRADI_2g20540v3	hypothetical protein		Os05g0506000		Similar to MS5-like protein (Fragment)		AT1G04770		Protein SULFUR DEFICIENCY-INDUCED 2 [Source:UniProtKB/Swiss-Prot;Acc:Q8L730]		38	plum1			0.00346483	0.00478443	0.00599196						2.69	1.22	2.21333	3.99333	12.3233	3.37667	4.86	3.18667	-1.73575	0.505551	-2.06485	-1.15614	1.87036	0.406151	-0.370946
TraesCS1A03G0808500	TraesCS1A02G325500	TraesCS1A01G325500	TRIAE_CS42_1AL_TGACv1_000457_AA0012560	Traes_1AL_680ECC3CB		123061890	LOC123061890	XP_044341112.1	jacalin-related lectin 3-like			BRADI_2g20447v3	hypothetical protein		Os05g0508400		Mannose-binding lectin domain containing protein						27	white			0.00632509	-0.00896362	0.00439685						15.2967	6.50333	22.4267	6.45667	9.42667	2.07333	20.6033	9.48667	-1.40291	-2.06454	-2.20315	-1.64393	-0.164087	-1.54298	0.497542
TraesCS1A03G0809500	TraesCS1A02G326100	TraesCS1A01G326100	TRIAE_CS42_1AL_TGACv1_000533_AA0014090	Traes_1AL_B5CB664F1		123061935	LOC123061935	XP_044341167.1	photosystem II reaction center W protein, chloroplastic-like			BRADI_2g20380v3	hypothetical protein		Os01g0773700	PSBW	Similar to Photosystem II reaction center W protein (PSII 6.1 kDa protein) (Fragment)						1	turquoise	648		-0.010019	0.0149147	-0.0062044			B			7.04	41.25	18.23	63.9633	12.4333	178.633	31.4567	64.5167	2.45855	1.51671	4.18813	0.468266	0.399737	2.15807	1.34157
TraesCS1A03G0821600	TraesCS1A02G330900	TraesCS1A01G330900	TRIAE_CS42_1AL_TGACv1_002510_AA0042560		Ta.27561.1.S1_at	123062556	LOC123062556	XP_044342073.1	inositol-tetrakisphosphate 1-kinase 4-like			BRADI_3g43150v3	Inositol-tetrakisphosphate 1-kinase [Source:Projected from Arabidopsis thaliana (AT5G16760) UniProtKB/TrEMBL;Acc:A0A178U6K3]		Os02g0466400	OsITPK4	Similar to Inositol phosphate kinase						44	floralwhite	79		-0.00370171	0.00893642	-0.000376857						2.16333	3.16667	3.12333	5.44	3.02	11.7933	4.26	7.28667	0.229948	0.305282	2.39667	-0.0154743	0.61577	1.6657	0.540436
TraesCS1A03G0822300	TraesCS1A02G331100	TraesCS1A01G331100	TRIAE_CS42_1AL_TGACv1_003876_AA0051820	Traes_1AL_D1CE5E0D6		123172358	LOC123172358	XP_044445318.1	serine carboxypeptidase-like 51			BRADI_1g60610v3	hypothetical protein		Os03g0392600	OsSCP14	Peptidase S10, serine carboxypeptidase family protein		AT2G27920	SCPL51	Serine carboxypeptidase-like 51 [Source:UniProtKB/Swiss-Prot;Acc:Q67Y83]		1	turquoise	591		-0.00207046	0.00832918	-0.00456857						0	0.1	0	0.14	0	2.80333	0	0.133333	3.1723	4.2988	7.69926	3.19947	1.09074	4.32585	0
TraesCS1A03G0824700	TraesCS1A02G332500	TraesCS1A01G332500	TRIAE_CS42_1AL_TGACv1_000581_AA0015080	Traes_1AL_A4AD064F9		123062695	LOC123062695	XP_044342268.1	PLASMODESMATA CALLOSE-BINDING PROTEIN 4-like isoform X1			BRADI_2g20070v3	hypothetical protein		Os05g0512600		X8 domain containing protein		AT1G69295	PDCB4	PLASMODESMATA CALLOSE-BINDING PROTEIN 4 [Source:UniProtKB/Swiss-Prot;Acc:Q93V72]		11	greenyellow	89		-0.00346707	0.00921794	-0.0122489						1.28667	1.96	4.33667	8.93	1.82667	12.0533	3.35	2.94	0.532046	1.05415	2.90097	-0.562785	2.03711	2.26792	1.515
TraesCS1A03G0826700	TraesCS1A02G333600	TraesCS1A01G333600	TRIAE_CS42_1AL_TGACv1_001070_AA0024450	Traes_1AL_82FBE325B	TaAffx.128610.1.S1_at	123139998	LOC123139998	XP_044415666.1	rac-like GTP-binding protein 2			BRADI_2g19990v3	hypothetical protein		Os05g0513800	OsRAC2	Small GTP-binding protein OsRac2		AT4G28950	ARAC7	Rac-like GTP-binding protein ARAC7 [Source:UniProtKB/Swiss-Prot;Acc:O82480]		1	turquoise	816		-0.00557839	0.0110763	-0.00584004						0	0.08	0	1.33667	0.05	5.88667	0	0.953333	3.85685	6.65686	6.74311	5.65965	2.76426	3.21315	0
TraesCS1A03G0828400	TraesCS1A02G334700	TraesCS1A01G334700	TRIAE_CS42_1AL_TGACv1_002693_AA0044510		Ta.5864.1.S1_at	123062882	LOC123062882	XP_044342504.1	cytochrome P450 71A1-like			BRADI_2g19910v3	hypothetical protein		Os05g0515200		Cytochrome P450 family protein						33	darkolivegreen			0.00321747	0.0178281	0.00567147						0.27	2.91	0.846667	0.99	8.31333	10.5	12.69	2.01667	3.27026	0.0329793	0.377467	-3.26421	-1.66257	3.04153	1.57472
TraesCS1A03G0829000	TraesCS1A02G334800	TraesCS1A01G334800	TRIAE_CS42_1AL_TGACv1_001359_AA0029300			123173603	LOC123173603	XP_044445870.1	cytochrome P450 71A1-like														11	greenyellow	245		-0.00591453	0.0172429	-0.0194042						0.86	4.96333	12.48	31.14	4.15	54.6933	10.1367	7.37333	2.20474	1.1481	3.83456	-0.907661	2.54082	3.40608	3.59747
TraesCS1A03G0829100	TraesCS1A02G334900	TraesCS1A01G334900	TRIAE_CS42_1AL_TGACv1_001359_AA0029280	Traes_1AL_B14FE48AF	Ta.9707.1.S1_at	123062920	LOC123062920	XP_044342549.1	auxin response factor 14-like			BRADI_2g19867v3	hypothetical protein		Os05g0515400	OsARF14	Similar to Auxin response factor 14						29	saddlebrown			-0.0114101	-0.00605654	-0.0195305						1.82667	11.8633	4.92333	28.2433	0.44	4.66	0.706667	3.62667	2.57976	2.28902	3.22967	1.73374	1.1359	0.858369	1.42664
TraesCS1A03G0829600	TraesCS1A02G335300	TraesCS1A01G335300	TRIAE_CS42_1AL_TGACv1_000465_AA0012660	Traes_1AL_223167DE0	Ta.16811.1.S1_s_at	123063009	LOC123063009	XP_044342652.1	acetylserotonin O-methyltransferase 1-like			BRADI_2g19850v3	hypothetical protein										33	darkolivegreen			0.00782683	0.00521421	0.00697555						0.04	0	0.52	0	3.4	0.0366667	4.78667	0.116667	-2.81488	-5.50648	-7.92181	-7.14279	0	-1.23133	3.04961
TraesCS1A03G0830000	TraesCS1A02G335700	TraesCS1A01G335700	TRIAE_CS42_1AL_TGACv1_000465_AA0012700	Traes_1AL_AD33CD5F6		123063018	LOC123063018	XP_044342664.1	acetylserotonin O-methyltransferase 1-like isoform X1														48	darkslateblue			0.00422603	0.0013337	0.00638363						0.443333	1.11667	0.9	0.573333	4.42	0.336667	2.36	0.693333	1.36611	-0.666495	-3.92715	-2.08792	-0.679604	-0.922555	1.353
TraesCS1A03G0830300	TraesCS1A02G335800	TraesCS1A01G335800	TRIAE_CS42_1AL_TGACv1_000569_AA0014860	Traes_1AL_03D760545		123174154	LOC123174154	XP_044445941.1	acetylserotonin O-methyltransferase 1-like														48	darkslateblue			0.00447028	0.00221349	0.00877509						0.14	1.34	0.44	0.183333	5.92	0.313333	1.91	0.353333	2.84152	-1.56124	-3.85979	-2.80136	-2.42346	0.194889	1.9793
TraesCS1A03G0832500	TraesCS1A02G337000	TraesCS1A01G337000	TRIAE_CS42_1AL_TGACv1_000792_AA0019160		Ta.18520.2.S1_at																		31	paleturquoise			0.000889811	-0.00700521	0.00481111						5.00667	3.11	3.11667	2.79667	4.93667	1.06	1.47	3.06667	-0.519272	-0.507338	-2.39501	0.00631886	-0.616972	-1.29634	-0.628906
TraesCS1A03G0836200	TraesCS1A02G338400	TraesCS1A01G338400	TRIAE_CS42_1AL_TGACv1_001541_AA0031970	Traes_1AL_762DB7548	Ta.12893.1.S1_at	123176816	LOC123176816	XP_044446819.1	non-symbiotic hemoglobin 1-like			BRADI_2g19690v3	hypothetical protein		Os05g0517600	OsHB5	Similar to Symbiotic-like hemoglobin 5						25	orange	1		0.0111649	-0.00494775	0.00209997						176.567	28.6267	35.4167	18.0467	161.443	25.01	40.8967	10.4433	-2.74396	-0.834398	-2.60585	-2.46296	-0.697096	1.87697	-2.60666
TraesCS1A03G0836400	TraesCS1A02G338600	TraesCS1A01G338600	TRIAE_CS42_1AL_TGACv1_002602_AA0043540	Traes_1AL_4F90FEB36		123063324	LOC123063324	XP_044343015.1	protein RICE FLOWERING LOCUS T 1-like	FT3-A1,TaFT3-A,TaFT3-A1		BRADI_2g19670v3	hypothetical protein										10	purple	3		-0.00774377	-0.00800557	0.0113593		-1				0.893333	7.58667	0.17	0.72	0.32	0.233333	0.19	4.61	2.87665	1.63978	-0.193126	3.74188	-3.20866	-4.35151	-1.9718
TraesCS1A03G0836700	TraesCS1A02G338700	TraesCS1A01G338700	TRIAE_CS42_1AL_TGACv1_001501_AA0031460			123176917	LOC123176917	XP_044446886.1	VQ motif-containing protein 4-like			BRADI_2g19600v3	hypothetical protein						AT1G28280	VQ4	VQ motif-containing protein 4 [Source:UniProtKB/Swiss-Prot;Acc:Q5M750]		39	orangered4	15		-0.00907066	0.00414759	-0.00204807						2.32	3.26	2.34667	17.6367	1.74667	7.02667	2.31333	13.1333	0.10576	2.32813	1.89994	2.18881	1.9544	-0.421722	-0.267971
TraesCS1A03G0838900	TraesCS1A02G339700	TraesCS1A01G339700	TRIAE_CS42_1AL_TGACv1_002522_AA0042810		Ta.12135.1.A1_at	123177355	LOC123177355	XP_044447103.1	uncharacterized protein LOC123177355						Os05g0519300		Protein of unknown function DUF506, plant family protein						21	darkred			0.00942718	0.00293821	-0.00116838						1.57333	0.0666667	5.08	0.0533333	3.66667	1.62	3.02	0.196667	-3.94793	-6.73392	-0.828804	-4.43529	-1.40187	3.76686	1.38413
TraesCS1A03G0839600	TraesCS1A02G340300	TraesCS1A01G340300	TRIAE_CS42_1AL_TGACv1_003565_AA0050400	Traes_1AL_D9CCA97D9		123063445	LOC123063445	XP_044343168.1	wall-associated receptor kinase 2-like			BRADI_3g49770v3	hypothetical protein										10	purple	245		-0.0115665	-0.00646107	0.00175002						0.276667	6.63667	0.46	4.15667	0	0.726667	0	5.02	3.93922	3.17685	5.41294	9.34623	-0.652117	-2.38159	0.110253
TraesCS1A03G0843500	TraesCS1A02G341600	TraesCS1A01G341600	TRIAE_CS42_1AL_TGACv1_002734_AA0044820	Traes_1AL_013C8AF6B		123063562	LOC123063562	XP_044343321.1	pseudo histidine-containing phosphotransfer protein 5-like isoform X1			BRADI_2g19440v3	hypothetical protein						AT3G16360	AHP4	AHP4 [Source:UniProtKB/TrEMBL;Acc:A0A384KT90]		36	yellowgreen			-0.00766739	-0.0140278	-0.0191923						0.86	10.6667	1.19	10.7867	0	0	0	0	2.2929	2.00589	0	0	-0.0186995	0	0.268306
TraesCS1A03G0844500	TraesCS1A02G342000	TraesCS1A01G342000	TRIAE_CS42_1AL_TGACv1_000469_AA0012850	Traes_1AL_38F9A30EA	Ta.14002.1.S1_at	123177879	LOC123177879	XP_044447284.1	peroxidase 2-like														10	purple			-0.00336942	-0.00573773	0.00504328						0.86	2.24	0.41	0.526667	0.273333	0.16	0.12	1.52667	2.00218	0.0599246	-0.498866	3.42771	-2.20503	-3.14984	-0.262776
TraesCS1A03G0846000	TraesCS1A02G342900	TraesCS1A01G342900	TRIAE_CS42_1AL_TGACv1_003859_AA0051790	Traes_1AL_AAB83FA9B		123063631	LOC123063631	XP_044343448.1	ABC transporter A family member 2-like isoform X2			BRADI_3g35400v3	hypothetical protein		Os08g0398000	OsABCA3	ABC transporter-like domain containing protein		AT3G47730	ABCA2	ATH1 [Source:UniProtKB/TrEMBL;Acc:A0A178V6R6]		5	green	428		-0.0148123	-0.0126347	0.00134065						5.98	35.7633	4.52333	29.1433	1.79667	4.43	1.48667	29.9367	2.47493	2.35139	1.52924	3.90668	-0.511379	-2.15195	-0.387846
TraesCS1A03G0846100	TraesCS1A02G343000	TraesCS1A01G343000	TRIAE_CS42_1AL_TGACv1_001642_AA0033350	Traes_1AL_3564C0828	TaAffx.9296.1.S1_at	123063644	LOC123063644	XP_044343454.1	ABC transporter A family member 7-like			BRADI_3g35390v3	hypothetical protein		Os08g0398300	OsABCA4	ABC transporter-like domain containing protein		AT3G47780	ABCA7	ABC transporter A family member 7 [Source:UniProtKB/Swiss-Prot;Acc:Q9STT5]		5	green	320		-0.0145769	-0.0139945	-0.000395537						3.20667	19.1233	2.45333	16.7333	0.303333	1.53	0.303333	15.25	2.68488	2.79466	1.62553	5.00351	-0.317109	-3.06723	-0.426889
TraesCS1A03G0847000	TraesCS1A02G343700	TraesCS1A01G343700	TRIAE_CS42_1AL_TGACv1_002766_AA0045020	Traes_1AL_DC43D6836	Ta.21508.1.A1_a_at	123063657	LOC123063657	XP_044343469.1	uncharacterized protein LOC123063657			BRADI_2g19350v3	hypothetical protein										8	pink	319		0.0157955	-0.00897733	0.00574955			A			96.7467	14.0567	80.13	6.8	68.38	6.98333	86.8867	10.49	-2.89647	-3.74412	-3.34356	-3.56116	-1.09693	-0.173958	-0.249284
TraesCS1A03G0852100	TraesCS1A02G347000	TraesCS1A01G347000	TRIAE_CS42_1AL_TGACv1_003265_AA0048990	Traes_1AL_1A1E3798D		123179810	LOC123179810	XP_044447635.1	uncharacterized protein LOC123179810			BRADI_2g19200v3	hypothetical protein		Os05g0526700		Harpin-induced 1 domain containing protein						2	blue	567		-0.00651564	-0.00362987	0.0110455						0.436667	1.23333	0.0733333	1.11667	0.0433333	0.06	0.05	4.48667	1.53363	2.87934	3.39228	5.86809	-0.442861	-4.09928	-1.78857
TraesCS1A03G0852900	TraesCS1A02G347400	TraesCS1A01G347400	TRIAE_CS42_1AL_TGACv1_000178_AA0005490	Traes_1AL_5D7BD417F		123063811	LOC123063811	XP_044343628.1	anthocyanidin 5,3-O-glucosyltransferase-like														2	blue	17		-0.00154817	-0.00389781	0.00808425						1.26333	2.54	1.57333	1.46333	1.16667	0.38	2.26333	4.15667	1.02708	-0.469381	-1.11627	0.601822	-1.0983	-2.46883	0.398154
TraesCS1A03G0853300	TraesCS1A02G347700	TraesCS1A01G347700	TRIAE_CS42_1AL_TGACv1_002261_AA0040140	Traes_1AL_7EAFBE83A	Ta.7051.2.S1_at	123063827	LOC123063827	XP_044343629.1	respiratory burst oxidase homolog protein A-like			BRADI_2g19090v3	hypothetical protein		Os05g0528000	rbohC	Similar to RbohAOsp (Fragment)						39	orangered4	2		-0.00664888	-0.00167854	-0.00137567						4.25	9.60667	3.27667	15.0533	5.03	6.81	2.74	8.81	1.05092	2.07587	0.512362	1.22702	0.634043	0.0742676	-0.390907
TraesCS1A03G0856000	TraesCS1A02G349000	TraesCS1A01G349000	TRIAE_CS42_1AL_TGACv1_000906_AA0021570	Traes_1AL_E04AE1B94		123064073	LOC123064073	XP_044343643.1	ubiquitin domain-containing protein 1-like			BRADI_2g19030v3	hypothetical protein										39	orangered4	326		-0.0107721	0.00124689	-0.00336506						0.463333	3.37667	0.786667	5.77333	0.14	3.15333	0.133333	4.71333	3.48061	2.56122	3.44344	3.93246	0.571044	-0.31052	1.49043
TraesCS1A03G0858000	TraesCS1A02G349900	TraesCS1A01G349900	TRIAE_CS42_1AL_TGACv1_003185_AA0048590	Traes_1AL_2EBF6E6C5		123179868	LOC123179868	XP_044447702.1	chaperone protein dnaJ C76, chloroplastic-like isoform X1			BRADI_2g19010v3	hypothetical protein		Os05g0529700	OsDjC50	Similar to electron transporter/ heat shock protein binding protein						49	plum2	18		-0.00854246	0.00572708	0.00103913						0.76	1.62667	0.306667	2.53667	0.09	4.67667	0.476667	4.92667	1.26421	3.38769	5.42443	2.82057	0.29638	0.349426	-1.8271
TraesCS1A03G0859800	TraesCS1A02G350400	TraesCS1A01G350400	TRIAE_CS42_1AL_TGACv1_001183_AA0026630		TaAffx.120360.1.A1_at	123064252	LOC123064252	XP_044343708.1	heat stress transcription factor A-4d-like	HsfA4c		BRADI_2g18980v3	Heat stress transcription factor Spl7 (Heat shock transcription factor) (Heat shock factor RHSF10) [Source: Projected from Oryza sativa (Os05g0530400)]		Os05g0530400	SPL7	Heat stress transcription factor Spl7 (Heat shock transcription factor) (Heat shock factor RHSF10)						3	brown	799		-0.0160213	-0.0111028	0.011465						1.56667	15.9533	2.06667	8.09333	0.296667	1.28667	0.21	34.4367	3.31093	1.77766	1.93371	6.71915	-1.30648	-4.3081	0.226798
TraesCS1A03G0862200	TraesCS1A02G351300	TraesCS1A01G351300	TRIAE_CS42_1AL_TGACv1_000654_AA0016480			123179925	LOC123179925	XP_044447773.1	rapid alkalinization factor-like			BRADI_2g12770v3	hypothetical protein		Os01g0358100	OsRALF-6	Rapid ALkalinization Factor family protein						8	pink			0.00778412	0.00331795	0.000900549						6.80667	0.783333	7.81667	0.353333	5.75667	6.27667	2.98333	1.61	-3.113	-4.40888	-0.0371786	-0.965217	-1.4301	2.14742	-0.134214
TraesCS1A03G0862600	TraesCS1A02G351600	TraesCS1A01G351600	TRIAE_CS42_1AL_TGACv1_002245_AA0040020			123064325	LOC123064325	XP_044343760.1	cytochrome P450 94B3-like			BRADI_4g19187v3	hypothetical protein		Os12g0443000		Similar to Cytochrome P450 family protein, expressed		AT5G63450	CYP94B1	cytochrome P450, family 94, subfamily B, polypeptide 1 [Source:TAIR;Acc:AT5G63450]		3	brown	72		-0.00652416	-0.00525427	0.00516177						1.20667	3.15667	0.973333	0.923333	0.0666667	0.993333	0	4.08667	1.47718	-0.822694	4.04298	7.57547	-2.04147	-1.63285	0.258411
TraesCS1A03G0863600	TraesCS1A02G351900	TraesCS1A01G351900	TRIAE_CS42_1AL_TGACv1_000612_AA0015790	Traes_1AL_17F4F7A9B	TaAffx.129134.1.S1_at	123064335	LOC123064335	XP_044343769.1	alpha-1,3-arabinosyltransferase XAT2-like			BRADI_3g11310v3	hypothetical protein		Os02g0330200	OsXAT2	Glycosyltransferase AER61, uncharacterized domain containing protein						44	floralwhite	4		-0.00790733	0.00609413	-0.00293838						2.67333	6.88333	5.44667	7.26667	1.95333	20.0233	2.31667	11.45	1.28509	0.421096	3.31905	1.8356	0.0931072	1.32184	0.957103
TraesCS1A03G0867300	TraesCS1A02G353900	TraesCS1A01G353900																					6	red	643		-0.00832347	-0.00914357	0.00580223						2.43667	9.86333	2.81667	7.19333	1.58	1.35333	1.36333	11.4	1.7981	1.25355	-0.24854	2.42551	-0.635581	-2.71957	-0.0910274
TraesCS1A03G0869900	TraesCS1A02G355300	TraesCS1A01G355300	TRIAE_CS42_1AL_TGACv1_001075_AA0024550	Traes_1AL_ED8C9876C		123064636	LOC123064636	XP_044344013.1	pathogenesis-related protein PR-4-like														2	blue	656		-0.0209254	-0.00513075	0.0190408						8.33333	56.8833	2.02	37.05	3.36333	10.5833	2.62333	235.317	2.63329	3.78319	1.79425	6.05681	-0.67734	-3.31811	-1.82724
TraesCS1A03G0872400	TraesCS1A02G356600	TraesCS1A01G356600			TaAffx.7274.1.S1_at																		6	red	166		-0.00491785	-0.00673593	0.00917157						0.693333	2.72667	0.48	0.51	0.226667	0.03	0.103333	3.07333	1.84154	0.239178	-3.55301	4.27892	-2.0733	-6.51722	-0.470941
TraesCS1A03G0873200	TraesCS1A02G356900	TraesCS1A01G356900	TRIAE_CS42_1AL_TGACv1_000767_AA0018710	Traes_1AL_A37AB3144	Ta.29440.2.S1_a_at	123064776	LOC123064776	XP_044344110.1	probable choline kinase 2			BRADI_2g18690v3	hypothetical protein		Os05g0535400		Choline/ethanolamine kinase family protein		AT1G74320		Probable choline kinase 2 [Source:UniProtKB/Swiss-Prot;Acc:Q8L518]		10	purple			-0.00670915	-0.0103783	0.0115582						20.4667	51.3	4.87	22.2067	23.2433	6.73333	5.14333	29.8333	1.09681	1.92847	-1.84265	1.85037	-1.24662	-1.67708	-2.07829
TraesCS1A03G0873700	TraesCS1A02G357200	TraesCS1A01G357200	TRIAE_CS42_1AL_TGACv1_001598_AA0032730	Traes_1AL_F1BBE97D5	Ta.1780.3.S1_x_at	123064785	LOC123064785	XP_044344122.1	6-phosphogluconate dehydrogenase, decarboxylating 2, chloroplastic			BRADI_1g54350v3	hypothetical protein		Os11g0484500	Os6PGDH2	Similar to 6-phosphogluconate dehydrogenase		AT1G64190	PGD1	6-phosphogluconate dehydrogenase, decarboxylating 1, chloroplastic [Source:UniProtKB/Swiss-Prot;Acc:Q9SH69]		8	pink	34		0.0088094	-0.00148863	-0.00137348						4.52	0.643333	7.73	1.27667	4.41667	1.48333	6.05	1.09	-3.01807	-2.58848	-1.65358	-2.63027	1.135	0.454475	0.705409
TraesCS1A03G0874000	TraesCS1A02G357400	TraesCS1A01G357400	TRIAE_CS42_1AL_TGACv1_002521_AA0042740	Traes_1AL_DB08E00EB		123064803	LOC123064803	XP_044344144.1	protein PIGMENT DEFECTIVE 338, chloroplastic-like			BRADI_2g18650v3	hypothetical protein		Os05g0535800		Similar to F14O23.10 protein		AT1G71720		F14O23.10 protein [Source:UniProtKB/TrEMBL;Acc:Q9M9H4]		22	darkgreen			0.0046997	0.00562736	-0.00324237						0.636667	0.366667	2.45667	0.143333	0.933333	2.57667	2.89	0.403333	-1.04809	-2.64779	1.59422	-2.95266	-0.171637	3.09137	1.42807
TraesCS1A03G0874600	TraesCS1A02G357900	TraesCS1A01G357900	TRIAE_CS42_1AL_TGACv1_000567_AA0014810	Traes_1AL_5E4EECFBC	Ta.18775.1.S1_at	123064834	LOC123064834	XP_044344173.1	probable aldehyde dehydrogenase	P5CDH		BRADI_2g18550v3	Delta-1-pyrroline-5-carboxylate dehydrogenase 12A1, mitochondrial [Source:Projected from Arabidopsis thaliana (AT5G62530) UniProtKB/Swiss-Prot;Acc:Q8VZC3]		Os05g0536400		Similar to Delta-1-pyrroline-5-carboxylate dehydrogenase		AT5G62530	ALDH12A1	Delta-1-pyrroline-5-carboxylate dehydrogenase 12A1, mitochondrial [Source:UniProtKB/Swiss-Prot;Acc:Q8VZC3]		11	greenyellow	178		-0.00321063	0.00337042	-0.00861886						8.96	9.58	9.64667	12.67	5.26667	22.37	5.92333	8.07333	-0.134178	0.230743	2.18373	-0.0741256	0.32068	1.99894	-0.0442412
TraesCS1A03G0874800	TraesCS1A02G358100	TraesCS1A01G358100	TRIAE_CS42_1AL_TGACv1_002051_AA0038150			123180147	LOC123180147	XP_044448056.1	probable WRKY transcription factor 51			BRADI_2g18530v3	hypothetical protein		Os05g0537100	OsWRKY7	WRKY transcription factor 10		AT5G64810	WRKY51	Probable WRKY transcription factor 51 [Source:UniProtKB/Swiss-Prot;Acc:Q93WU9]		4	yellow	7		-0.008731	-0.000943803	0.00890123						2.42333	2.28667	2.2	1.69333	0.27	3.76667	0.106667	14.4167	-0.35651	-0.412647	3.54788	6.4324	-0.0784592	-1.10135	-0.0223228
TraesCS1A03G0875300	TraesCS1A02G358400	TraesCS1A01G358400	TRIAE_CS42_1AL_TGACv1_000249_AA0007270	Traes_1AL_9ADA7A031		123064843	LOC123064843	XP_044344185.1	probable WRKY transcription factor 75										AT5G26170	WRKY50	Probable WRKY transcription factor 50 [Source:UniProtKB/Swiss-Prot;Acc:Q8VWQ5]		4	yellow			-0.00782526	0.0022081	0.00785595						3.76	2.06333	1.51667	2.18333	0.786667	7.93333	0.123333	12.3767	-1.06883	0.231476	3.28512	6.1614	-0.150914	0.0972691	-1.45122
TraesCS1A03G0875600	TraesCS1A02G358600	TraesCS1A01G358600	TRIAE_CS42_1AL_TGACv1_000249_AA0007290	Traes_1AL_C87568D4D	Ta.26201.1.S1_at	123064864	LOC123064864	XP_044344205.1	protein phosphatase 2C 50-like			BRADI_2g18510v3	hypothetical protein		Os05g0537400	OsPP2C50	Similar to Protein phosphatase 2C						15	midnightblue	35		-0.00777611	0.00342652	-0.0017268						5.13667	13.1933	7.76667	11.3367	4.52667	21.01	3.4	17.3767	1.15171	0.229628	2.57834	1.79927	-0.419192	0.733353	0.502891
TraesCS1A03G0876600	TraesCS1A02G359100	TraesCS1A01G359100	TRIAE_CS42_2AL_TGACv1_092924_AA0267190	Traes_1AL_A8190CDDF		123180171	LOC123180171	XP_044448078.1	putative cyclin-dependent kinase F-2			BRADI_4g08010v3	hypothetical protein		Os12g0424700		Serine/threonine protein kinase domain containing protein						46	brown4	1		-0.00596656	0.00985606	0.00653811						0.42	0.7	0.61	0.836667	0.916667	7.35333	0.19	5.46	0.91784	0.537831	2.91452	4.4103	0.50189	1.08979	0.881898
TraesCS1A03G0881300	TraesCS1A02G361100	TraesCS1A01G361100	TRIAE_CS42_1AL_TGACv1_000880_AA0020950	Traes_1AL_114B29053	Ta.23101.2.A1_at	123065089	LOC123065089	XP_044344393.1	glucosamine inositolphosphorylceramide transferase 1			BRADI_2g18300v3	hypothetical protein		Os05g0540000		EXTL2, alpha-1,4-N-acetylhexosaminyltransferase domain containing protein		AT5G04500		Glycosyltransferase family protein 64 protein C5 [Source:UniProtKB/Swiss-Prot;Acc:Q84WB7]		41	lightsteelblue1			-0.00547769	-0.00444643	6.65898e-05						17.1167	15.1733	10.2	10.8267	6.11667	14.69	2.64667	16.8633	-0.301598	-0.206621	1.21204	2.21134	-0.692495	0.277446	-0.787473
TraesCS1A03G0887900	TraesCS1A02G364700	TraesCS1A01G364700	TRIAE_CS42_1AL_TGACv1_003785_AA0051500		Ta.16095.2.S1_a_at	123065486	LOC123065486	XP_044344690.1	uncharacterized protein At1g15400-like						Os05g0542732		Conserved hypothetical protein						7	black	51		0.0065437	-0.000929648	0.00341175			A			4.28333	0.596667	3.87333	0.543333	3.92333	1.52667	2.86	1.37667	-2.35825	-3.19441	-1.5604	-0.561855	-1.00223	-0.00582076	-0.166079
TraesCS1A03G0888500	TraesCS1A02G365100	TraesCS1A01G365100	TRIAE_CS42_1AL_TGACv1_001312_AA0028530	Traes_1AL_3E87FA48B		123065510	LOC123065510	XP_044344710.1	phospholipase D beta 1-like														9	magenta	98		-0.00907401	0.00375242	0.00113987						3.00333	6.63	2.73667	12.0067	3.19667	11.1367	2.16333	14.7	1.11734	1.9038	1.70026	2.11301	0.658888	0.0521458	-0.127578
TraesCS1A03G0891000	TraesCS1A02G366100	TraesCS1A01G366100	TRIAE_CS42_1AL_TGACv1_002296_AA0040640	Traes_1AL_C7FD90C13		123180354	LOC123180354	XP_044448335.1	myb-related protein Hv33-like						Os05g0543600	OsMYB86-L2	Similar to Myb-related protein						28	skyblue			0.00161127	-0.00168299	-0.00378795						0.803333	0.753333	2.97	0.706667	0.663333	0.9	1.02333	0.67	-0.0807839	-2.70942	1.12952	-1.08623	-0.697834	1.20733	1.9308
TraesCS1A03G0891600	TraesCS1A02G366500	TraesCS1A01G366500	TRIAE_CS42_1AL_TGACv1_002988_AA0046960	Traes_1AL_EB8A4C9F1	TaAffx.81513.1.S1_at	123065647	LOC123065647	XP_044344826.1	cytochrome P450 89A2-like			BRADI_3g43890v3	hypothetical protein		Os02g0108800		Cytochrome P450 domain containing protein						49	plum2	16		-0.0121163	0.00937901	0.00504543						1.09333	8.76667	1.22333	8.1	3.07333	16.7667	1.44333	17.89	2.9942	2.79842	2.53498	3.1741	-0.409841	0.28048	-0.214059
TraesCS1A03G0891800	TraesCS1A02G366700	TraesCS1A01G366700	TRIAE_CS42_1AL_TGACv1_001173_AA0026510	Traes_1AL_2DFDA847B	Ta.27541.1.S1_at	123065674	LOC123065674	XP_044344849.1	phosphatidylinositol/phosphatidylcholine transfer protein SFH8-like isoform X1			BRADI_2g17860v3	hypothetical protein		Os05g0545000	OsSNDP6	Similar to Phosphatidylinositol transfer-like protein IV						50	thistle2			0.00248248	-0.0114843	0.00507238				-1		37.2267	31.32	34.1133	24.59	34.7933	8.02667	25.2967	24.2333	-0.348966	-0.718332	-2.14407	-0.535313	-0.535635	-1.14871	-0.166269
TraesCS1A03G0896800	TraesCS1A02G369600	TraesCS1A01G369600	TRIAE_CS42_1AL_TGACv1_000734_AA0018090	Traes_1AL_00E379EFF	Ta.1842.1.S1_a_at	123065943	LOC123065943	XP_044345063.1	phosphomethylethanolamine N-methyltransferase-like			BRADI_2g17680v3	hypothetical protein		Os05g0548900	OsPEAMT2	Similar to Phosphoethanolamine methyltransferase						21	darkred			0.00492074	0.00242832	-0.0252355						388.98	160.24	1340.8	587.457	261.087	900.15	368.333	80.3333	-1.39449	-1.47396	1.61426	-2.70961	1.65683	3.88038	1.73631
TraesCS1A03G0899300	TraesCS1A02G370600	TraesCS1A01G370600	TRIAE_CS42_1AL_TGACv1_000668_AA0016720	Traes_1AL_258E7F2A3		123180483	LOC123180483	XP_044448494.1	ethylene-responsive transcription factor ERF109-like														24	darkgrey			-0.00158775	-0.00541872	0.00127155						5.12	2.99	9.78333	0.53	1.29333	5.09	0	4.91	-0.832002	-4.61375	1.73824	8.27507	-2.8973	0.692288	0.884458
TraesCS1A03G0899400	TraesCS1A02G370700	TraesCS1A01G370700	TRIAE_CS42_1AL_TGACv1_000668_AA0016740		TaAffx.116140.1.S1_at	123065993	LOC123065993	XP_044345108.1	ethylene-responsive transcription factor ERF109-like			BRADI_3g38140v3	hypothetical protein										23	darkturquoise			-0.00332998	-0.00103483	0.00381517						1.07333	1.12667	4.23	0.293333	0.363333	2.47	0	4.43	-0.0449873	-4.21957	2.55122	5.13644	-2.23067	-0.190983	1.94391
TraesCS1A03G0902800	TraesCS1A02G371900	TraesCS1A01G371900	TRIAE_CS42_U_TGACv1_642807_AA2123550		Ta.8327.1.A1_s_at	123066121	LOC123066121	XP_044345205.1	threonine synthase, chloroplastic-like			BRADI_2g17620v3	hypothetical protein		Os05g0549700		Similar to Threonine synthase, chloroplast precursor (EC 4.2.3.1) (TS)		AT4G29840	TS1	Threonine synthase 1, chloroplastic [Source:UniProtKB/Swiss-Prot;Acc:Q9S7B5]		1	turquoise			-0.00313696	0.00539591	-0.00419756						0.996667	0.713333	2.12667	2.01	0.41	4.67	1.15	2.58	-0.515226	-0.270746	3.67611	0.866847	1.72506	1.39761	1.48058
TraesCS1A03G0903400	TraesCS1A02G372300	TraesCS1A01G372300	TRIAE_CS42_1AL_TGACv1_002863_AA0045650		Ta.27316.1.S1_at	123066132	LOC123066132	XP_044345213.1	AP2/ERF and B3 domain-containing protein Os05g0549800-like														2	blue			-0.00511555	-0.00309453	0.00645268						3.29	1.7	0.616667	2.41667	0.913333	1.43667	0.37	5.29667	-0.946144	1.64637	0.88166	3.24048	0.358303	-0.900944	-2.23422
TraesCS1A03G0907900	TraesCS1A02G374200	TraesCS1A01G374200				123180616	LOC123180616	XP_044448626.1	non-specific lipid-transfer protein 2-like			BRADI_2g17540v3	hypothetical protein		Os05g0550300	OsLTP2.4	Similar to Lipid transfer protein (Fragment)						22	darkgreen			0.0050942	0.0105216	0.000675971						6.31667	4.78667	13.2633	4.34	11.4933	21.61	26.71	8.06667	-0.549535	-1.67872	1.11074	-2.1992	-0.187849	2.1609	0.941333
TraesCS1A03G0908000	TraesCS1A02G374300	TraesCS1A01G374300	TRIAE_CS42_1AL_TGACv1_003689_AA0051070	Traes_1AL_259C7CB69		123180622	LOC123180622	XP_044448640.1	non-specific lipid-transfer protein 2-like														14	cyan	32		-0.00848626	0.0121265	-0.0105398		1				0	0.636667	0	6	0.173333	7.39	0.366667	1.99667	5.91165	8.10532	5.92258	0.373102	2.15792	3.93187	0
TraesCS1A03G0908600	TraesCS1A02G374800	TraesCS1A01G374800	TRIAE_CS42_1AL_TGACv1_000799_AA0019360	Traes_1AL_9E7395A93	TaAffx.113610.1.S1_at	123066563	LOC123066563	XP_044345553.1	zinc finger protein BRUTUS-like			BRADI_2g17507v3	hypothetical protein										47	bisque4			-0.0032434	-0.00248644	-0.00657179						2.20333	3.8	2.73333	3.49333	0.933333	2.81	1.23333	2.02	0.710562	0.338393	2.15091	-0.248786	-0.00827439	1.49882	0.363895
TraesCS1A03G0910400	TraesCS1A02G375600	TraesCS1A01G375600	TRIAE_CS42_1AL_TGACv1_003124_AA0048030	Traes_1AL_A4B5C1474		123066599	LOC123066599	XP_044345588.1	heat stress transcription factor A-2c-like	HsfA2-13		BRADI_3g26920v3	hypothetical protein		Os10g0419300	OsHsfA6a	Heat stress transcription facto		AT3G22830	HSFA6B	Heat stress transcription factor A-6b [Source:UniProtKB/Swiss-Prot;Acc:Q9LUH8]		5	green	42		-0.0070374	-0.00915434	0.00137997						3.08333	13.1433	2.77667	8.56	2.13	1.94333	1.9	7.16667	2.1308	1.48443	-0.0272633	1.62265	-0.759645	-1.44003	-0.113276
TraesCS1A03G0912800	TraesCS1A02G377300	TraesCS1A01G377300	TRIAE_CS42_1AL_TGACv1_000138_AA0004420																				32	violet	9		0.00619623	0.000456713	0.00146956						1.17333	0	0.986667	0	1.14	0	2.54	0	-5.52042	-4.96827	-4.5278	-4.28625	0	-0.66196	-0.19415
TraesCS1A03G0914900	TraesCS1A02G378500	TraesCS1A01G378500	TRIAE_CS42_1AL_TGACv1_000051_AA0001410			123180829	LOC123180829	XP_044448908.1	uncharacterized protein LOC123180829						Os05g0552800		Conserved hypothetical protein						23	darkturquoise			-0.000352834	-0.00505647	0.0102451						2.09	1.08	3.30667	0.263333	1.6	0.803333	0.17	4.48	-0.918465	-3.26634	-1.24681	3.41168	-1.55927	-1.95562	0.788604
TraesCS1A03G0917700	TraesCS1A02G379700	TraesCS1A01G379700	TRIAE_CS42_1AL_TGACv1_000772_AA0018880	Traes_1AL_F0688BFDE	Ta.17230.1.S1_at	123180846	LOC123180846	XP_044448938.1	transcription factor MYB4-like			BRADI_2g46770v3	hypothetical protein		Os05g0553400	OsMYB55	Similar to Myb-related transcription factor-like protein (MYB transcription factor)						6	red	28		-0.00395358	-0.00684367	0.00108864						1.62	2.60667	1.39333	2.16	0.493333	0.543333	0.53	2.54667	0.703525	0.433435	0.337669	2.26525	-0.358749	-1.79226	-0.0886591
TraesCS1A03G0920700	TraesCS1A02G381400	TraesCS1A01G381400	TRIAE_CS42_1AL_TGACv1_001087_AA0024710			123180890	LOC123180890	XP_044449006.1	uncharacterized protein LOC123180890														4	yellow	144		-0.00560378	-0.000219124	0.0170437						0.82	1.4	0.96	1.01	1.92667	1.22667	0	9.32667	0.872111	-0.734761	0.0128461	2.8962	-1.24487	-0.96727	0.362005
TraesCS1A03G0920800	TraesCS1A02G381500	TraesCS1A01G381500	TRIAE_CS42_1AL_TGACv1_001087_AA0024720	Traes_1AL_2CB1F6DC2	Ta.3174.1.S1_at	123067183	LOC123067183	XP_044346032.1	CDP-diacylglycerol--serine O-phosphatidyltransferase 2-like			BRADI_2g17230v3	hypothetical protein		Os05g0554400	OsSUI2	Phosphatidyl serine synthase family protein						19	lightyellow	369		-0.0121143	0.0012144	0.00271346						1.03333	8.46333	0.443333	6.37333	0.793333	4.64	0.683333	9.31	2.98022	3.10591	2.66592	3.31635	-0.658578	-0.328598	-0.784267
TraesCS1A03G0921200	TraesCS1A02G381800	TraesCS1A01G381800	TRIAE_CS42_1AL_TGACv1_000841_AA0020150	Traes_1AL_B9BC939F9	Ta.26515.1.A1_at	123067194	LOC123067194	XP_044346036.1	uncharacterized protein LOC123067194			BRADI_2g17220v3	hypothetical protein		Os05g0554500		Conserved hypothetical protein						24	darkgrey			0.00458741	-0.00384476	-0.00234633						1.67667	0.276667	3.39	0.346667	0.723333	0.35	1.35333	0.483333	-2.85821	-3.18703	-1.53527	-2.16189	0.427928	0.0877752	0.756747
TraesCS1A03G0924800	TraesCS1A02G382900	TraesCS1A01G382900	TRIAE_CS42_1AL_TGACv1_000602_AA0015540	Traes_1AL_A5D20159F		123067269	LOC123067269	XP_044346081.1	serine/threonine protein phosphatase 2A 57 kDa regulatory subunit B' kappa isoform-like			BRADI_2g17210v3	hypothetical protein		Os05g0555100	OsPP2A-B'kappa	Similar to Protein phosphatase 2A B'kappa subunit		AT5G25510	B'KAPPA	Serine/threonine protein phosphatase 2A 57 kDa regulatory subunit B' kappa isoform [Source:UniProtKB/Swiss-Prot;Acc:Q93YV6]		14	cyan	5		-0.00592866	0.00181557	-0.0093488						0.616667	1.21333	1.51667	3.81	0.06	3.53333	0.366667	1.66	0.893666	1.21103	4.93804	1.78405	1.38361	1.331	1.06625
TraesCS1A03G0926100	TraesCS1A02G383400	TraesCS1A01G383400	TRIAE_CS42_1AL_TGACv1_001552_AA0032180																				3	brown	1013		-0.0167245	-0.00776241	0.0096543						0.266667	10.89	0.44	8.13	0	0.63	0	19.8833	6.03002	4.2836	4.6495	8.35471	-1.35392	-4.79801	0.392503
TraesCS1A03G0926300	TraesCS1A02G383500	TraesCS1A01G383500	TRIAE_CS42_1AL_TGACv1_001552_AA0032220	Traes_1AL_6EDAE7905	Ta.22965.1.S1_a_at	123067279	LOC123067279	XP_044346085.1	60S ribosomal protein L35a-1-like			BRADI_2g17180v3	hypothetical protein		Os05g0556900	OsRPL35a.3	Ribosomal protein L35Ae family protein						28	skyblue			0.0039349	0.00241113	-0.00729454						2.85667	0.87	8.40333	2.02667	2.06	4.14	3.51	1.49333	-1.67922	-2.19557	1.3154	-1.52358	1.05812	1.93326	1.57448
TraesCS1A03G0926600	TraesCS1A02G383600	TraesCS1A01G383600	TRIAE_CS42_1AL_TGACv1_003726_AA0051200									BRADI_5g03270v3	hypothetical protein										17	grey60	11		-0.00328319	-0.005401	-0.00319831						0.0766667	2.97	0.04	0.503333	0	0	0	0	5.0645	5.35537	0.744571	0	-2.45076	1.20803	-2.74166
TraesCS1A03G0926900	TraesCS1A02G383800	TraesCS1A01G383800	TRIAE_CS42_1AL_TGACv1_003726_AA0051220			123180994	LOC123180994	XP_044449134.1	CASP-like protein 1U2			BRADI_4g11523v3	hypothetical protein		Os11g0649700		Uncharacterised protein family UPF0497, trans-membrane plant subgroup domain containing protein						2	blue			-0.0147737	0.00174023	0.0105217						6.63	22.0733	4.41333	14.8067	5.64667	26.2767	0.866667	67.08	1.70541	1.49298	2.51099	5.96055	-0.815258	-0.625171	-0.60283
TraesCS1A03G0927400	TraesCS1A02G384000	TraesCS1A01G384000	TRIAE_CS42_1AL_TGACv1_001669_AA0033810	Traes_1AL_C2313FF27								BRADI_2g17170v3	hypothetical protein		Os05g0556000		Oxoglutarate/iron-dependent oxygenase domain containing protein		AT4G13400		2-oxoglutarate (2OG) and Fe(II)-dependent oxygenase superfamily protein [Source:UniProtKB/TrEMBL;Acc:F4JT13]		36	yellowgreen			-0.010292	-0.008131	-0.00635706						1.88333	10.9433	1.22333	7.88667	0.36	1.77	0.27	3.49	2.39081	2.32535	2.15227	2.90506	-0.751273	-0.720134	-0.685807
TraesCS1A03G0928500	TraesCS1A02G384300	TraesCS1A01G384300	TRIAE_CS42_1AL_TGACv1_004446_AA0053550			123181002	LOC123181002	XP_044449147.1	probable 1-deoxy-D-xylulose-5-phosphate synthase 2, chloroplastic														3	brown	480		-0.0126829	-0.00640328	0.0163524						0.446667	9	0.383333	2.24333	0.23	0.683333	0.113333	15.4833	4.67173	2.46635	1.4051	7.15454	-2.1912	-4.0102	0.0141759
TraesCS1A03G0929500	TraesCS1A02G384600	TraesCS1A01G384600			TaAffx.132743.7.S1_x_at										gene-psbK				ATCG00070	PSBK	Photosystem II reaction center protein K [Source:UniProtKB/Swiss-Prot;Acc:P56782]		40	mediumpurple3			-0.00218797	-0.00263015	-0.0061193						53.25	96.65	76.8467	165.107	67.9167	55.26	61.1467	61.7967	1.73362	2.60959	0.58088	0.970339	1.36888	1.60484	0.492906
TraesCS1A03G0931900	TraesCS1A02G385000	TraesCS1A01G385000										BRADI_1g39207v3	hypothetical protein						ATCG00510	PSAI	Photosystem I reaction center subunit VIII [Source:UniProtKB/TrEMBL;Acc:A0A1B1W4U9]		29	saddlebrown			-0.00272554	-0.00110863	-0.0101893						0	0	0	17.91	0	0	0	0	0	5.43217	16.5516	0.416468	19.1059	3.65051	13.7065
TraesCS1A03G0940400	TraesCS1A02G385900	TraesCS1A01G385900	TRIAE_CS42_1AL_TGACv1_000639_AA0016330	Traes_1AL_52462CEAD		123067458	LOC123067458	XP_044346181.1	uncharacterized protein LOC123067458														24	darkgrey			0.00951915	-0.0109081	-0.00257976						22.3733	3.92	32.7833	5.29	10.1733	3.62667	11.0633	3.21667	-2.39148	-2.68099	-1.89057	-2.44198	0.192992	0.212625	0.482506
TraesCS1A03G0947000	TraesCS1A02G388400	TraesCS1A01G388400	TRIAE_CS42_1AL_TGACv1_002583_AA0043330	Traes_1AL_E5224B6EA	TaAffx.58240.1.S1_at	123067599	LOC123067599	XP_044346268.1	probable ubiquitin-conjugating enzyme E2 24 isoform X1			BRADI_2g16960v3	Probable ubiquitin-conjugating enzyme E2 24 [Source:Projected from Arabidopsis thaliana (AT2G33770) UniProtKB/Swiss-Prot;Acc:Q8VY10]		Os05g0557700	LTN1	Ubiquitin-conjugating E2 enzyme, Phosphate homeostasis, Negative regulator of the inorganic phosphate (Pi)-starvation response-signaling pathwa						50	thistle2			0.00309709	-0.011799	-0.000552208						10.66	6.61333	10.5167	6.56667	7.51	1.59	4.94333	3.83	-0.787568	-0.946615	-2.40738	-0.946025	-0.214367	-0.937278	-0.0553193
TraesCS1A03G0951500	TraesCS1A02G390500	TraesCS1A01G390500	TRIAE_CS42_1AL_TGACv1_001153_AA0026180	Traes_1AL_B6D253895		123067814	LOC123067814	XP_044346377.1	cell number regulator 2-like			BRADI_3g46930v3	hypothetical protein		Os02g0579800	OsFWL2	Similar to Fw2.2		AT1G14870	PCR2	PCR2 [Source:UniProtKB/TrEMBL;Acc:A0A178WDU8]		3	brown	865		-0.0107742	-0.00645609	0.00549065						138.743	280.57	88.2633	267.433	72.5267	123.957	36.3367	434.287	0.89263	1.39488	0.791483	3.01736	-0.160148	-1.23368	-0.662397
TraesCS1A03G0954700	TraesCS1A02G391700	TraesCS1A01G391700	TRIAE_CS42_1AL_TGACv1_000099_AA0003270	Traes_1AL_88C4E33E6											Os02g0615500		Protein kinase, core domain containing protein						40	mediumpurple3			-0.00729117	-0.0122902	-0.0135007						2.70333	15.45	11.78	24.6467	1.74667	1.90667	1.98667	5.06	2.35138	0.905276	-0.175163	0.586007	0.551123	-0.893777	1.99723
TraesCS1A03G0954800	TraesCS1A02G391800	TraesCS1A01G391800	TRIAE_CS42_1AL_TGACv1_000099_AA0003270	Traes_1AL_88C4E33E6								BRADI_4g08210v3	hypothetical protein										47	bisque4			-0.00657423	-0.0153282	-0.0125928						1.55	11.2433	7.65333	13.1367	0.693333	0.396667	1.06333	2.55	2.70702	0.567224	-0.273766	0.872319	0.0524487	-2.07562	2.19224
TraesCS1A03G0955000	TraesCS1A02G392000	TraesCS1A01G392000	TRIAE_CS42_1AL_TGACv1_000099_AA0003250	Traes_1AL_C42DE440F	TaAffx.97040.1.S1_at	123067985	LOC123067985	XP_044346464.1	photosystem I reaction center subunit VI, chloroplastic-like			BRADI_2g16810v3	Photosystem I reaction center subunit VI, chloroplast precursor (PSI- H) (Light-harvesting complex I 11 kDa protein) (GOS5 protein) [Source: Projected from Oryza sativa (Os05g0560000)]		Os05g0560000	PSAH	Photosystem I reaction center subunit VI, chloroplast precursor (PSI- H) (Light-harvesting complex I 11 kDa protein) (GOS5 protein)		AT1G52230	PSAH2	Photosystem I reaction center subunit VI-2, chloroplastic [Source:UniProtKB/Swiss-Prot;Acc:Q9SUI6]		48	darkslateblue			0.00825933	0.00547421	0.00779884						1369.03	664.023	1271.15	477.693	2877.14	1224.64	2909.54	882.72	-1.14334	-1.61913	-1.13595	-2.28474	-0.619928	1.03044	-0.144138
TraesCS1A03G0956000	TraesCS1A02G392300	TraesCS1A01G392300	TRIAE_CS42_1AL_TGACv1_000116_AA0003900	Traes_1AL_CD341167E	Ta.16698.1.S1_at	123068007	LOC123068007	XP_044346476.1	trihelix transcription factor ASIL2-like			BRADI_2g16780v3	hypothetical protein		Os05g0560600		Homeodomain-like containing protein						4	yellow	158		-0.0059488	-0.000968643	0.012488						2.58667	2.95333	3.61	2.51	2.19333	3.25667	1.02333	17.7433	0.563278	-0.633849	0.638445	3.15773	-0.938842	-1.91801	0.258285
TraesCS1A03G0958900	TraesCS1A02G394500	TraesCS1A01G394500	TRIAE_CS42_1AL_TGACv1_000327_AA0008960	Traes_1AL_0FC07AEF4		123068029	LOC123068029	XP_044346492.1	3-deoxy-manno-octulosonate cytidylyltransferase-like			BRADI_2g16710v3	Nucleotide-diphospho-sugar transferases superfamily protein [Source:Projected from Arabidopsis thaliana (AT1G53000) TAIR;Acc:AT1G53000]		Os05g0561500		Similar to CMP-KDO synthetase (EC 2.7.7.38) (Fragment)		AT1G53000	KDSB	Nucleotide-diphospho-sugar transferases superfamily protein [Source:TAIR;Acc:AT1G53000]		20	royalblue			0.00361443	-0.0026337	-0.005884						5.13333	0.663333	1.68	1.06333	1.54	2.02667	0.74	0.12	-3.07761	-0.863098	0.286033	-2.53438	0.623892	4.01979	-1.59062
TraesCS1A03G0959100	TraesCS1A02G394400	TraesCS1A01G394400	TRIAE_CS42_1AL_TGACv1_000327_AA0008940	Traes_1AL_F32957C4C	TaAffx.128724.1.S1_at	123068040	LOC123068040	XP_044346496.1	uncharacterized protein LOC123068040			BRADI_2g16680v3	hypothetical protein		Os05g0561600		Protein of unknown function DUF1421 domain containing protein						30	steelblue			0.000565885	-0.0136247	0.00646933						42.47	18.6033	16.6133	28.6567	41.2367	5.72	6.88333	19.4367	-1.36613	0.482891	-3.06259	0.963827	0.456156	-1.56577	-1.39286
TraesCS1A03G0961800	TraesCS1A02G395100	TraesCS1A01G395100	TRIAE_CS42_1AL_TGACv1_000591_AA0015340			123068069	LOC123068069	XP_044346510.1	dolabradiene monooxygenase-like			BRADI_3g23200v3	hypothetical protein		Os06g0641500		Similar to Cytochrome P450 CYP71Y10						2	blue	177		-0.00394248	0.00241114	0.0131478						0.386667	1.25667	0.24	0.95	0.99	0.863333	1.19667	5.16333	1.5634	1.98376	-0.235986	1.51644	-0.527581	-2.07555	-0.947945
TraesCS1A03G0962200	TraesCS1A02G395300	TraesCS1A01G395300	TRIAE_CS42_1AL_TGACv1_000591_AA0015400	Traes_1AL_59865C6CB	Ta.9254.1.S1_at	123068091	LOC123068091	XP_044346519.1	protein psi1-like			BRADI_2g16660v3	hypothetical protein		Os05g0562300	OsDjB7	Similar to DnaJ-like protein		AT2G20560		At2g20560/T13C7.15 [Source:UniProtKB/TrEMBL;Acc:Q9SIL3]		3	brown	1		-0.00543709	-4.54961e-05	0.00125263						1.6	6.01	3.02333	5.80667	1.20333	3.31	4.45	7.9	2.03119	0.830217	1.15072	0.409423	-0.189238	-0.826251	1.01173
TraesCS1A03G0966800	TraesCS1A02G396400	TraesCS1A01G396400	TRIAE_CS42_1AL_TGACv1_001847_AA0035810	Traes_1AL_B9A38E127	Ta.28852.1.S1_at	543357	LOC543357	XP_044346608.1	auxin response factor 15	ETT1-alpha		BRADI_2g16610v3	hypothetical protein		Os05g0563400	OsARF15	Similar to Auxin response factor 5		AT2G33860	ARF3	Auxin response factor 3 [Source:UniProtKB/Swiss-Prot;Acc:O23661]		16	lightcyan	310		-0.00721876	0.00148835	-0.00263962						1.60333	3.88667	1.32	4.73667	1.14667	5.49333	0.756667	4.13	1.26415	1.34878	2.08133	2.12167	-0.0766954	0.770665	-0.161331
TraesCS1A03G0968100	TraesCS1A02G396800	TraesCS1A01G396800	TRIAE_CS42_U_TGACv1_642438_AA2117630			100037577	LOC100037577	XP_044346643.1	fasciclin-like arabinogalactan protein 12			BRADI_2g16560v3	hypothetical protein		Os05g0563600	OsFLA6	FAS1 domain domain containing protein						12	tan			-0.00423169	0.000187563	-0.00863995						0.813333	6.96333	6.49667	6.94667	0.656667	3.91667	4.90667	3.78667	3.11634	0.0916049	2.67458	-0.627732	0.10293	0.621535	3.12767
TraesCS1A03G0968200	TraesCS1A02G396900	TraesCS1A01G396900	TRIAE_CS42_1AL_TGACv1_000936_AA0022180			123068215	LOC123068215	XP_044346657.1	monothiol glutaredoxin-S9-like										AT1G28480	GRXC9	Glutaredoxin-C9 [Source:UniProtKB/Swiss-Prot;Acc:Q9SGP6]		7	black	3		0.00714799	-0.00694476	0.0100244						69.8733	17.65	58.9033	11.6833	55.82	14.3133	30.21	30.7433	-2.07338	-2.71416	-1.90099	-0.499023	-0.87782	-0.495006	-0.237042
TraesCS1A03G0968400	TraesCS1A02G397100	TraesCS1A01G397100	TRIAE_CS42_1AL_TGACv1_000936_AA0022200		Ta.25423.1.S1_at	123068230	LOC123068230	XP_044346675.1	protein N-lysine methyltransferase METTL21A-like			BRADI_2g16530v3	hypothetical protein		Os05g0564100		Nicotinamide N-methyltransferase, putative domain containing protein						8	pink	283		0.00654885	-0.00298036	0.000289554			A			5.50333	1.85	5.22333	1.29	4.03	1.61	4.96	1.36333	-1.77546	-1.98134	-1.25525	-2.07572	-0.277358	0.210331	-0.0714768
TraesCS1A03G0972400	TraesCS1A02G398400	TraesCS1A01G398400	TRIAE_CS42_1AL_TGACv1_000073_AA0002580	Traes_1AL_57586AC98	Ta.8775.1.S1_at	123068346	LOC123068346	XP_044346859.1	ras-related protein RABA1f-like			BRADI_2g16480v3	hypothetical protein										1	turquoise	201		-0.00355971	0.00662167	-0.00544811						2.16667	1.68	2.83333	3.5	1.04667	8.78	1.99	3.82333	-0.69498	0.488383	2.8546	0.236983	1.4864	1.61644	0.303041
TraesCS1A03G0977000	TraesCS1A02G400500	TraesCS1A01G400500	TRIAE_CS42_U_TGACv1_641277_AA2090430	Traes_1AL_42189A8B0	Ta.25355.1.A1_at							BRADI_2g16402v3	hypothetical protein		Os05g0565400		Protein of unknown function DUF561 family protein						1	turquoise			0.00397697	0.00517377	-0.00358475						4.48667	3.51	5.56333	0.686667	2.07333	9.72333	6.67667	1.74667	-0.120037	-2.58217	1.8875	-2.02698	-1.96634	2.7152	0.495793
TraesCS1A03G0978600	TraesCS1A02G401200	TraesCS1A01G401200	TRIAE_CS42_1AL_TGACv1_000365_AA0010300																				42	lightcyan1			0.00265062	-0.00886047	-0.00477205						2.73667	0.38	1.84333	0.14	0	0	0	0	-2.85011	-3.5705	0	0	-1.42318	0	-0.7028
TraesCS1A03G0982700	TraesCS1A02G402500	TraesCS1A01G402500	TRIAE_CS42_1AL_TGACv1_000482_AA0013200	Traes_1AL_C4B40A214	Ta.3094.1.S1_x_at	123068544	LOC123068544	XP_044347078.1	GDP-mannose 3,5-epimerase 1			BRADI_3g26860v3	hypothetical protein		Os10g0417600	OsGME1	NAD(P)-binding domain containing protein		AT5G28840	GME	GDP-mannose 3,5-epimerase [Source:UniProtKB/Swiss-Prot;Acc:Q93VR3]		15	midnightblue	17		-0.0101449	0.00985306	-0.00473319						2.51333	16.4367	10.8767	25.3	3.49333	40.6567	10.76	32.94	2.30664	1.03222	3.75082	1.00303	0.534756	0.908293	1.80917
TraesCS1A03G0986400	TraesCS1A02G403000	TraesCS1A01G403000	TRIAE_CS42_1AL_TGACv1_000318_AA0008630	Traes_1AL_EF89F456A		123068612	LOC123068612	XP_044347163.1	cold-regulated 413 inner membrane protein 2, chloroplastic-like			BRADI_2g16300v3	hypothetical protein		Os05g0566800	COR413-TM1	Cold acclimation protein COR413-TM1						11	greenyellow	430		-0.0105866	0.0118806	-0.00682481			B			1.88667	5.74	1.72667	14.7533	1.91333	29.8633	1.65	8.21	1.68305	2.32033	4.31511	1.58458	0.952633	2.72231	0.315344
TraesCS1A03G0986900	TraesCS1A02G403300	TraesCS1A01G403300	TRIAE_CS42_1AL_TGACv1_000708_AA0017440		Ta.29587.1.A1_at	123068639	LOC123068639	XP_044347188.1	chlorophyll a-b binding protein of LHCII type 1-like														38	plum1			-0.00229817	0.00512225	0.0108982						2307.72	1992.17	530.343	1555.88	3264.16	2948.69	1343.46	2828.92	-0.366602	1.18521	0.106918	0.523505	-0.62697	0.734569	-2.17878
TraesCS1A03G0988100	TraesCS1A02G403800	TraesCS1A01G403800	TRIAE_CS42_1AL_TGACv1_000383_AA0010660	Traes_1AL_B77FFBAFC		123068673	LOC123068673	XP_044347224.1	chlorophyll a-b binding protein, chloroplastic-like														38	plum1			0.00144828	0.00560736	0.026781						76.8733	191.79	12.44	8.42333	571.097	123.477	25.2967	74.86	1.20215	-0.733505	-2.09689	1.07562	-4.59787	1.34136	-2.66221
TraesCS1A03G0989300	TraesCS1A02G404200	TraesCS1A01G404200			Ta.9481.2.S1_x_at	123181763	LOC123181763	XP_044450037.1	uncharacterized protein LOC123181763			BRADI_1g52750v3	hypothetical protein										18	lightgreen	15		-0.0132023	0.00300343	-0.0146244						4.22333	18.1633	5.66	46.3367	1.28667	25.8267	3.64	14.3433	2.04996	2.90605	4.13255	1.44235	1.25523	1.37116	0.399146
TraesCS1A03G0989800	TraesCS1A02G404300	TraesCS1A01G404300	TRIAE_CS42_1AL_TGACv1_003606_AA0050640	Traes_1AL_ABEA95ABE																			32	violet			0.00361334	-0.00412156	-7.8798e-07						4.21333	2.18667	5.86667	5.50667	6.60667	1.64667	5.18667	2.8	-1.10658	-0.579827	-2.06911	-1.35559	0.725257	-0.264394	0.198507
TraesCS1A03G0990900	TraesCS1A02G404800	TraesCS1A01G404800	TRIAE_CS42_1AL_TGACv1_000680_AA0016920	Traes_1AL_93E51B797		123068775	LOC123068775	XP_044347364.1	protein RADIALIS-like 3														10	purple			-0.00377331	-0.00442351	0.0141967						6.01	13.2567	0.223333	4.42	8.04	1.88667	2.76333	7.16333	1.26972	3.46372	-2.29303	0.921676	-1.71523	-1.68479	-3.90925
TraesCS1A03G0991400	TraesCS1A02G405100	TraesCS1A01G405100	TRIAE_CS42_1AL_TGACv1_000072_AA0002340	Traes_1AL_8ACA5E563		123181790	LOC123181790	XP_044450066.1	protein RADIALIS-like 3														29	saddlebrown			-0.0030852	-0.000459258	-0.00897846						0	0.71	0	3.18333	0	0.353333	0.356667	0	4.01212	5.92544	1.53162	3.71179	0.915799	-0.606198	-0.997577
TraesCS1A03G0991600	TraesCS1A02G405300	TraesCS1A01G405300	TRIAE_CS42_1AL_TGACv1_000072_AA0002350	Traes_1AL_4476835E0																			36	yellowgreen			-0.00590307	-0.0059075	-0.00512734						2.35	8.91	0	7.87	3.22667	1.68333	0.446667	1.69	1.48366	4.65827	0.273823	0.40159	-0.440753	0.491949	-3.61537
TraesCS1A03G0991800	TraesCS1A02G405400	TraesCS1A01G405400	TRIAE_CS42_1AL_TGACv1_000072_AA0002360																				40	mediumpurple3			-0.00920825	-0.00783148	-0.00535763						7.77333	14.9533	0.726667	22.18	1.45667	4.74667	2.54	5.37333	1.03366	4.04958	1.20266	0.313609	0.165373	0.570496	-2.85055
TraesCS1A03G0993300	TraesCS1A02G405800	TraesCS1A01G405800	TRIAE_CS42_1AL_TGACv1_000609_AA0015630	Traes_1AL_449465EF7	TaAffx.128848.3.S1_at	123068792	LOC123068792	XP_044347388.1	sugar transporter ERD6-like 4			BRADI_2g16070v3	hypothetical protein		Os05g0567800		Similar to solute carrier family 2, facilitated glucose transporter member 8						7	black			0.00575083	-0.00504033	0.0121868						15.5767	3.46667	8.46	3.46333	12.3733	2.46	10.5067	9.86	-2.20005	-1.22891	-2.26582	-0.627297	-0.04647	-1.48332	-1.0176
TraesCS1A03G0994300	TraesCS1A02G406300	TraesCS1A01G406300	TRIAE_CS42_1AL_TGACv1_002546_AA0042990	Traes_1AL_26E629ECA	Ta.6120.1.S1_at	123181803	LOC123181803	XP_044450113.1	iron-sulfur cluster assembly protein 1-like			BRADI_2g16040v3	hypothetical protein										14	cyan	170		-0.0159152	0.011869	-0.0121116						0.466667	7.62667	0.63	16.29	0.553333	27.4833	0.546667	7.27667	3.83171	5.24552	6.28569	3.8612	1.2057	2.50381	-0.208118
TraesCS1A03G0994600	TraesCS1A02G406500	TraesCS1A01G406500	TRIAE_CS42_1AL_TGACv1_001455_AA0030800		Ta.21192.1.S1_x_at	123068809	LOC123068809	XP_044347411.1	50S ribosomal protein L12, chloroplastic-like			BRADI_2g45730v3	hypothetical protein		Os05g0568300		Similar to 50S ribosomal protein L12, chloroplast precursor (CL12)						22	darkgreen			0.00306344	0.0101127	0.000508206						3.12333	6	2.13	1.02667	3.36333	12.37	14.8467	2.97667	1.05603	-1.20075	1.97425	-2.71147	-2.7217	2.66051	-0.464924
TraesCS1A03G0995700	TraesCS1A02G407100	TraesCS1A01G407100	TRIAE_CS42_1AL_TGACv1_000407_AA0011440	Traes_1AL_681865869		123068814	LOC123068814	XP_044347424.1	prohibitin-1, mitochondrial-like			BRADI_1g02170v3	hypothetical protein		Os03g0841700		Similar to Prohibitin		AT4G28510	PHB1	PHB1 [Source:UniProtKB/TrEMBL;Acc:A0A178UY74]		14	cyan	30		-0.00490158	0.00116236	-0.00684005						23.38	34.75	29.33	44.76	12.39	46.7267	20.7967	34.5633	0.394319	0.412336	2.29183	0.0404926	0.250567	1.32527	0.232549
TraesCS1A03G0999100	TraesCS1A02G408300	TraesCS1A01G408300	TRIAE_CS42_1AL_TGACv1_000922_AA0021960			123181961	LOC123181961	XP_044450324.1	uncharacterized protein LOC123181961						Os05g0568800		Protein of unknown function DUF1645 family protein						43	ivory			0.00345257	-0.00724294	0.0110594						9.60333	10.5467	22.3833	7.35667	7.32667	2.31	26.93	20.3567	-0.0342339	-1.62596	-1.82887	-1.05424	-0.384072	-2.48421	1.20765
TraesCS1A03G1002400	TraesCS1A02G409700	TraesCS1A01G409700			Ta.17076.2.S1_x_at	123069035	LOC123069035	XP_044347708.1	uncharacterized protein LOC123069035			BRADI_2g15950v3	hypothetical protein		Os05g0569200		Protein of unknown function DUF3143 domain containing protein		AT5G52960		At5g52960 [Source:UniProtKB/TrEMBL;Acc:Q9LVV6]		1	turquoise	117		0.000318363	0.00763284	-0.00195353						7.73	9.92	11.0767	8.52667	10.0467	27.99	15.8267	10.6	0.0532563	-0.346798	1.63898	-0.994291	-0.387969	2.14947	0.0120849
TraesCS1A03G1003700	TraesCS1A02G410300	TraesCS1A01G410300	TRIAE_CS42_1AL_TGACv1_002244_AA0040000	Traes_1AL_A40D123CB	Ta.12694.1.S1_at	123069067	LOC123069067	XP_044347741.1	protein WHAT'S THIS FACTOR 1 homolog, chloroplastic-like			BRADI_2g15890v3	WTF1 [Source:Projected from Arabidopsis thaliana (AT4G01037) UniProtKB/TrEMBL;Acc:A0A178UW54]		Os05g0571100		Peptidase C12, ubiquitin carboxyl-terminal hydrolase 1 domain containing protein		AT4G01037	WTF1	WTF1 [Source:UniProtKB/TrEMBL;Acc:A0A178UW54]		8	pink	76		0.0106528	-0.00690908	-0.00307399			A			37.05	6.37667	32.2133	8.92333	19.46	5.64667	31.1733	4.82	-2.68173	-2.03376	-1.86529	-3.26466	0.403232	0.641324	-0.244745
TraesCS1A03G1003900	TraesCS1A02G410500	TraesCS1A01G410500	TRIAE_CS42_1AL_TGACv1_002725_AA0044760			123069083	LOC123069083	XP_044347765.1	transcription factor WRKY19-like														34	darkmagenta	21		-0.0129072	0.0022743	0.0063319						0.573333	3.10667	0.68	6.48667	0.603333	3.52667	0.143333	15.0167	2.01571	3.12253	2.02241	6.35653	1.05958	-1.51084	-0.0472492
TraesCS1A03G1004100	TraesCS1A02G410700	TraesCS1A01G410700	TRIAE_CS42_1AL_TGACv1_002537_AA0042930		TaAffx.109191.1.S1_at	123069090	LOC123069090	XP_044347777.1	transcription factor WRKY19-like			BRADI_2g15877v3	hypothetical protein		Os05g0571200	OsWRKY19	Similar to WRKY transcription factor 19						2	blue	64		-0.00708365	-0.00624117	0.0137676						5.26667	3.05333	3.37	4.35333	3.08333	2.11333	0	19.5367	-0.763794	-0.303336	-0.478199	6.48203	0.099757	-2.53397	-0.360701
TraesCS1A03G1006500	TraesCS1A02G411900	TraesCS1A01G411900	TRIAE_CS42_1AL_TGACv1_000056_AA0001780	Traes_1AL_1DC9BD199	Ta.27542.1.A1_at	123069152	LOC123069152	XP_044347871.1	ketol-acid reductoisomerase, chloroplastic-like			BRADI_2g15790v3	hypothetical protein		Os05g0573700		Similar to Ketol-acid reductoisomerase, chloroplast precursor (EC 1.1.1.86) (Acetohydroxy-acid reductoisomerase) (Alpha-keto-beta-hydroxylacil reductoisomerase)		AT3G58610		Ketol-acid reductoisomerase, chloroplastic [Source:UniProtKB/Swiss-Prot;Acc:Q05758]		8	pink	2		0.00974482	0.00131811	-0.00392865						99.26	21.4067	135.607	29.09	78.64	57.0367	111.727	25.55	-2.28307	-2.47869	-0.432626	-2.65393	0.207811	1.69564	0.403427
TraesCS1A03G1009400	TraesCS1A02G413300	TraesCS1A01G413300	TRIAE_CS42_1AL_TGACv1_001102_AA0025000	Traes_1AL_458638D61		123069228	LOC123069228	XP_044347964.1	uncharacterized protein LOC123069228			BRADI_2g15710v3	hypothetical protein		Os05g0574700		Similar to cDNA clone:002-182-C01, full insert sequence		AT2G25605		At2g25605 [Source:UniProtKB/TrEMBL;Acc:Q6NM03]		29	saddlebrown			-0.00648201	-0.00336724	-0.00513463						19.39	29.1133	12.6367	67.9433	12.2367	20.6467	11.6833	25.65	0.522431	2.00772	1.07594	0.63581	0.902157	0.608937	-0.58313
TraesCS1A03G1009900	TraesCS1A02G413400	TraesCS1A01G413400	TRIAE_CS42_1AL_TGACv1_001102_AA0024980		Ta.4398.1.S1_at	123069222	LOC123069222	XP_044347957.1	3-ketoacyl-CoA synthase 11-like			BRADI_2g15720v3	hypothetical protein		Os05g0574600	OsCHS	Similar to 3-ketoacyl-CoA synthase						4	yellow	498		-0.0057997	-0.00251639	0.0139543						0.573333	1.07667	0.29	0.79	0.37	0.283333	0.133333	5.93333	1.01041	1.4656	0.248289	5.0528	-0.384664	-4.09798	-0.839852
TraesCS1A03G1011500	TraesCS1A02G414000	TraesCS1A01G414000	TRIAE_CS42_1AL_TGACv1_002449_AA0042080			123182126	LOC123182126	XP_044450531.1	uncharacterized protein LOC123182126			BRADI_2g15690v3	hypothetical protein		Os05g0575000	OsCV	Similar to predicted protein		AT2G25625		Expressed protein [Source:UniProtKB/TrEMBL;Acc:Q8S8K8]		2	blue	930		-0.0153348	-0.00239564	0.0126385						2.13	13.0733	0.23	9.03667	1.48333	3.77333	0.383333	26.62	2.34227	4.68142	1.05408	5.32294	-0.47804	-2.35375	-2.8172
TraesCS1A03G1012700	TraesCS1A02G414600	TraesCS1A01G414600	TRIAE_CS42_1AL_TGACv1_001063_AA0024240			123182180	LOC123182180	XP_044450599.1	uncharacterized protein LOC123182180						Os05g0576600		Conserved hypothetical protein						15	midnightblue	44		-0.00642811	0.00308115	0.000396128						0.25	1.62333	0.523333	1.14	0.0333333	2.57333	0.0666667	2.22667	2.29404	0.685925	4.4632	3.20062	0.24772	0.515039	1.85583
TraesCS1A03G1013900	TraesCS1A02G415100	TraesCS1A01G415100	TRIAE_CS42_1AL_TGACv1_002281_AA0040460		Ta.5945.1.S1_at	123182213	LOC123182213	XP_044450652.1	oleosin G-like			BRADI_2g15640v3	hypothetical protein		Os05g0576700		Oleosin family protein						46	brown4	5		-0.00527862	0.0116474	0.00306189						0.536667	1.08	0.383333	2.21667	0.583333	6.59667	1.97667	4.4	1.72201	1.36256	3.27753	0.10259	1.30376	1.60946	1.66321
TraesCS1A03G1015800	TraesCS1A02G416100	TraesCS1A01G416100	TRIAE_CS42_1AL_TGACv1_000890_AA0021220			123182240	LOC123182240	XP_044450681.1	probable calcium-binding protein CML14			BRADI_2g15570v3	hypothetical protein		Os05g0577500	OsCML14	EF-Hand type domain containing protein						4	yellow	187		-0.00369045	-0.000284077	0.0117825						1.33667	1.61333	1.10667	1.83333	2.20333	1.16667	1.28	7.54333	-0.112171	0.0921239	-1.13533	1.92979	-0.624221	-2.04971	-0.828517
TraesCS1A03G1021900	TraesCS1A02G418700	TraesCS1A01G418700	TRIAE_CS42_1AL_TGACv1_004186_AA0052710	Traes_1AL_36E53D1C5	TaAffx.66679.1.S1_at	123069605	LOC123069605	XP_044348430.1	LRR receptor-like serine/threonine-protein kinase EFR						Os11g0208900		Leucine rich repeat containing protein kinase						8	pink			0.00517449	-0.00923858	-0.00311154						10.0833	6.50333	12.67	7.92333	8.76	1.69	9.67333	3.25667	-0.595007	-0.776134	-2.30419	-1.94693	0.124059	-0.50284	0.305187
TraesCS1A03G1022200	TraesCS1A02G419000	TraesCS1A01G419000	TRIAE_CS42_1AL_TGACv1_001818_AA0035590	Traes_1AL_4490ED4C6								BRADI_2g14940v3	hypothetical protein		Os05g0579600		Homeodomain-like containing protein		AT2G21650	RL2	RSM1 [Source:UniProtKB/TrEMBL;Acc:A0A178VZA8]		7	black	8		0.00972403	-0.013895	-0.00386199			A			87.8033	21.69	57.28	25.6333	51.34	8.47	38.65	8.09	-2.31743	-1.27721	-2.6543	-2.75082	0.196794	0.654515	-0.843419
TraesCS1A03G1023200	TraesCS1A02G419300	TraesCS1A01G419300	TRIAE_CS42_1AL_TGACv1_000583_AA0015240	Traes_1AL_BB4298457		123182354	LOC123182354	XP_044450830.1	protein RADIALIS-like 3														30	steelblue			0.00575488	-0.00956087	0.00435726						33.78	9.15	13.2433	9.65667	18.47	3.88333	10.5133	6.78	-1.87417	-0.416724	-2.14522	-0.948425	0.0304846	-0.431409	-1.42696
TraesCS1A03G1029800	TraesCS1A02G422600	TraesCS1A01G422600	TRIAE_CS42_1AL_TGACv1_000750_AA0018310	Traes_1AL_6BB0848B9		123069767	LOC123069767	XP_044348644.1	putative receptor-like protein kinase At4g00960														36	yellowgreen			-0.00699085	-0.00814105	-0.00191222						6.96	11.0967	3.68	10.46	2.59333	3.66	1.15	7.77	0.629889	1.16008	0.381222	2.32321	-0.509903	-0.658144	-1.0401
TraesCS1A03G1029900	TraesCS1A02G422700	TraesCS1A01G422700	TRIAE_CS42_1AL_TGACv1_000750_AA0018320	Traes_1AL_05881352A		123182558	LOC123182558	XP_044451122.1	cysteine-rich receptor-like protein kinase 6 isoform X2														10	purple	79		-0.00699687	-0.00832942	0.00346849						1.33333	4.87667	0.483333	2.73667	0.496667	0.273333	0.183333	3.18	1.67084	2.47806	-0.895924	3.35296	-0.747619	-2.80557	-1.55484
TraesCS1A03G1030100	TraesCS1A02G422800	TraesCS1A01G422800	TRIAE_CS42_1AL_TGACv1_001256_AA0027860	Traes_1AL_C21696173	Ta.25487.1.S1_at	123182572	LOC123182572	XP_044451143.1	cysteine-rich receptor-like protein kinase 6 isoform X2						Os07g0538200		Serine/threonine protein kinase-related domain containing protein						47	bisque4	2		-0.00740478	-0.00445205	-0.00124939						1.62	5.59333	0.836667	5.23667	1.02333	1.6	0.39	3.18333	1.49332	2.5747	0.547274	2.76455	-0.177021	-0.529765	-1.2584
TraesCS1A03G1030200	TraesCS1A02G422900	TraesCS1A01G422900	TRIAE_CS42_1AL_TGACv1_001256_AA0027880	Traes_1AL_A22448033	Ta.20750.1.S1_at	123069776	LOC123069776	XP_044348653.1	glucan endo-1,3-beta-glucosidase 13-like						Os07g0538000		Similar to hydrolase, hydrolyzing O-glycosyl compounds						5	green	219		-0.019214	-0.000773452	0.00236224						1.77667	26.2967	0.496667	17.63	0.986667	9.97333	0.226667	23.8067	3.90503	4.56239	3.3112	5.93099	-0.735822	-0.734734	-1.39318
TraesCS1A03G1030600	TraesCS1A02G423100	TraesCS1A01G423100	TRIAE_CS42_1AL_TGACv1_000929_AA0022050	Traes_1AL_5C8689E82		123069789	LOC123069789	XP_044348664.1	uncharacterized AAA domain-containing protein C16E9.10c-like			BRADI_2g15490v3	hypothetical protein		Os05g0584600		Similar to ATP binding / nucleoside-triphosphatase/ nucleotide binding						50	thistle2			0.00533512	-0.00752945	0.00513948						7.49	4.75667	4.60667	3.56667	10.5467	1.09333	6.38333	2.69333	-0.775357	-0.46951	-3.64897	-1.60683	-0.431355	-1.18258	-0.737202
TraesCS1A03G1031600	TraesCS1A02G423800	TraesCS1A01G423800	TRIAE_CS42_1AL_TGACv1_000696_AA0017270	Traes_1AL_DDEE6AC00	Ta.449.1.S1_at	123069825	LOC123069825	XP_044348695.1	late embryogenesis abundant protein Lea14-A-like			BRADI_2g15410v3	hypothetical protein		Os05g0584200	LEA8	Atypical late embryogenesis abundant (LEA) protein, Resistance to multiple abiotic stresse						1	turquoise	212		-0.00252487	0.000645462	-0.00371645						253.063	180.89	161.13	131.953	115.597	462.877	66.5167	157.953	-0.624963	-0.563398	2.21964	0.720799	-0.682177	2.3352	-0.743743
TraesCS1A03G1031900	TraesCS1A02G424000	TraesCS1A01G424000	TRIAE_CS42_1AL_TGACv1_000696_AA0017290			123069832	LOC123069832	XP_044348708.1	UDP-glycosyltransferase 88A1-like			BRADI_2g49067v3	hypothetical protein		Os01g0734800	OsUGT706F1	UDP-glucuronosyl/UDP-glucosyltransferase family protein						3	brown	870		-0.0147866	-0.00609908	0.00731238						1.59333	10.8267	1.85333	10.9967	0.7	2.76667	0.496667	26.4867	2.84388	2.34405	2.29549	5.42333	-0.23827	-2.67987	0.261567
TraesCS1A03G1033200	TraesCS1A02G424100	TraesCS1A01G424100	TRIAE_CS42_1AL_TGACv1_000845_AA0020270	Traes_1AL_17693190C	TaAffx.130091.1.S1_at																		20	royalblue			0.000552618	-0.00585792	-0.00266563						2.82667	0.313333	0.506667	0.66	0	0.17	0.193333	0.313333	-2.71591	-0.157692	2.06808	-0.297391	0.383451	-0.384608	-2.17476
TraesCS1A03G1038500	TraesCS1A02G426700	TraesCS1A01G426700	TRIAE_CS42_1AL_TGACv1_001537_AA0031900	Traes_1AL_0C41C44B1	Ta.14118.1.A1_at	123070039	LOC123070039	XP_044348992.1	RNA polymerase sigma factor sigE, chloroplastic/mitochondrial-like			BRADI_2g14790v3	hypothetical protein		Os05g0586600	OsSIG5	Similar to SIGE (RNA polymerase sigma subunit E); DNA binding / DNA-directed RNA polymerase/ sigma factor/ transcription factor		AT5G24120	SIGE	RNA polymerase sigma factor sigE, chloroplastic/mitochondrial [Source:UniProtKB/Swiss-Prot;Acc:Q9ZNX9]		39	orangered4	12		-0.00974116	-0.000788242	-0.00250452						7.41333	28.7333	12.0667	59.41	13.4	23.65	6.57667	33.2367	1.86515	2.16967	0.646959	1.85195	1.01626	-0.0122032	0.71174
TraesCS1A03G1039100	TraesCS1A02G426900	TraesCS1A01G426900	TRIAE_CS42_1AL_TGACv1_000466_AA0012750			123070047	LOC123070047	XP_044348999.1	pentatricopeptide repeat-containing protein At4g01030, mitochondrial-like			BRADI_2g14750v3	hypothetical protein		Os05g0586900		Hypothetical conserved gene						21	darkred	1		0.00638903	0.00557449	-0.00350937						1.79333	0.946667	4.25667	0.706667	2.79667	3.55667	5.76333	0.736667	-1.07903	-2.95045	0.273157	-3.46133	-0.759131	2.8222	1.11229
TraesCS1A03G1039400	TraesCS1A02G427100	TraesCS1A01G427100	TRIAE_CS42_1AL_TGACv1_000466_AA0012770	Traes_1AL_341E2A7A8		123070060	LOC123070060	XP_044349020.1	CTP synthase-like isoform X2			BRADI_2g14730v3	hypothetical protein						AT3G12670	emb2742	Emb2742 [Source:UniProtKB/TrEMBL;Acc:A0A384K8P2]		7	black	39		0.00477048	-0.00383515	-0.000406879			A			3.77667	1.08	3.31	2.4	3.95	0.846667	2.63	1.17333	-1.94384	-1.21389	-2.02752	-1.93931	0.251765	0.301042	-0.478183
TraesCS1A03G1040400	TraesCS1A02G427400	TraesCS1A01G427400	TRIAE_CS42_1AL_TGACv1_000360_AA0009890	Traes_1AL_8877426FB	Ta.7064.3.S1_at	123070099	LOC123070099	XP_044349056.1	TPR repeat-containing thioredoxin TTL1-like			BRADI_2g14710v3	hypothetical protein		Os05g0587300		Molecular chaperone, heat shock protein, Hsp40, DnaJ domain containing protein						11	greenyellow	179		-0.00224713	0.00626047	-0.0123158						0.17	0.133333	1.21667	1.80333	0.18	3.36333	0.193333	0.22	-0.0972411	0.424235	4.05695	-1.02256	3.13153	4.82047	2.61006
TraesCS1A03G1045700	TraesCS1A02G430200	TraesCS1A01G430200	TRIAE_CS42_1AL_TGACv1_001026_AA0023650	Traes_1AL_0121566F8	TaAffx.12215.2.S1_at	123057225	LOC123057225	XP_044336264.1	AAA-ATPase At3g50940-like			BRADI_2g14590v3	hypothetical protein										2	blue			-0.0091086	0.00468214	0.00768272						0.04	1.51333	0.156667	1.86667	0.163333	2.23667	0.4	6.99	4.02596	4.3743	5.19663	3.9399	0.330168	-0.906683	-0.018186
TraesCS1A03G1048300	TraesCS1A02G431300	TraesCS1A01G431300	TRIAE_CS42_1AL_TGACv1_001423_AA0030320	Traes_1AL_4BA4656FC		123178526	LOC123178526	XP_044447403.1	proteinase inhibitor PSI-1.2-like			BRADI_2g08717v3	hypothetical protein						AT1G72060		Serine-type endopeptidase inhibitor [Source:UniProtKB/TrEMBL;Acc:Q9C7G9]		46	brown4	1		-0.00923051	0.0166635	0.0124116						0.43	4.02	1.04	1.78	4.01333	22.4067	2.18667	15.6433	1.15807	1.94862	2.96182	1.86878	-0.33026	1.07242	-1.12082
TraesCS1A03G1048400	TraesCS1A02G431400	TraesCS1A01G431400	TRIAE_CS42_1AL_TGACv1_001423_AA0030310	Traes_1AL_34EA84D6C		123182887	LOC123182887	XP_044451496.1	pathogen-related protein-like														46	brown4	66		-0.0139886	0.021914	0.0060041						1.27667	16.15	2.20667	20.34	5.77	112.427	11.31	64.6933	3.86762	3.09278	4.48969	1.91105	0.284167	1.54629	1.05901
TraesCS1A03G1052700	TraesCS1A02G433500	TraesCS1A01G433500	TRIAE_CS42_1AL_TGACv1_000879_AA0020900	Traes_1AL_DAA3531A3	Ta.7738.1.S1_at	123070468	LOC123070468	XP_044349637.1	probable receptor-like protein kinase At2g42960 isoform X1			BRADI_2g14510v3	hypothetical protein		Os10g0497600		Serine/threonine protein kinase-related domain containing protein		AT2G42960		Probable receptor-like protein kinase At2g42960 [Source:UniProtKB/Swiss-Prot;Acc:Q9SJG2]		44	floralwhite	202		-0.00472388	0.0169099	0.00716009						0.573333	1.34	1.36667	2.28	3.62667	20.01	2.42667	8.62667	1.0714	0.901578	2.3726	1.40116	1.27502	1.49347	1.44484
TraesCS1A03G1057400	TraesCS1A02G435000	TraesCS1A01G435000	TRIAE_CS42_1AL_TGACv1_000825_AA0019830	Traes_1AL_CF6C67E1B	Ta.29866.1.S1_at	123070512	LOC123070512	XP_044349694.1	probable esterase D14L			BRADI_2g14500v3	hypothetical protein		Os05g0590300		Alpha/beta hydrolase fold-1 domain containing protein						33	darkolivegreen			0.0118645	0.00282097	0.0185487						17.2833	1.86	11.2233	1.76333	26.23	4.57333	37.5433	11.89	-3.06769	-2.86387	-2.61748	-2.15903	-0.465203	-0.940905	-0.669023
TraesCS1A03G1058300	TraesCS1A02G435100	TraesCS1A01G435100	TRIAE_CS42_1AL_TGACv1_003156_AA0048350	Traes_1AL_D7A903FD2	TaAffx.28239.1.S1_at	123183066	LOC123183066	XP_044451739.1	probable calcium-binding protein CML27			BRADI_1g53830v3	hypothetical protein										3	brown	1075		-0.00899088	-0.00224454	0.00696013						0.0766667	2.55	0.06	1.85667	0.12	0.643333	0	4.55	5.44402	5.27607	2.78624	6.42541	-1.08044	-2.46838	-0.912534
TraesCS1A03G1058600	TraesCS1A02G435200	TraesCS1A01G435200	TRIAE_CS42_1AL_TGACv1_001175_AA0026540	Traes_1AL_A8C52986E		123183077	LOC123183077	XP_044451749.1	calmodulin-like protein 3														3	brown	556		-0.00561333	-0.00104818	0.00486608						0	1.05333	0	1.17	0.136667	0.213333	0.0833333	2.13333	4.46928	4.87005	2.40915	4.34404	-0.596759	-2.98511	-0.997577
TraesCS1A03G1058900	TraesCS1A02G435400	TraesCS1A01G435400	TRIAE_CS42_1AL_TGACv1_002090_AA0038670			123058875	LOC123058875	XP_044337515.1	indole-2-monooxygenase-like														2	blue	320		-0.00569593	-0.00214687	0.0147723						0.0933333	1.02	0	0.143333	0	0	0.123333	4.78333	3.49336	2.24223	0	5.71059	-2.84535	-8.91122	-1.59424
TraesCS1A03G1060100	TraesCS1A02G436100	TraesCS1A01G436100	TRIAE_CS42_1AL_TGACv1_001664_AA0033760																				32	violet	342		0.0093001	-0.0063559	0.00197104			A			18.74	8.26333	17.53	5.36667	21.3133	4.03667	21.5267	4.20667	-1.05332	-2.32563	-2.46627	-2.90871	-1.45159	0.402245	-0.179289
TraesCS1A03G1075600	TraesCS1A02G441500	TraesCS1A01G441500	TRIAE_CS42_1AL_TGACv1_002332_AA0040930		TaAffx.59917.1.S1_at	123183472	LOC123183472	XP_044452207.1	uncharacterized protein LOC123183472 isoform X1														32	violet	67		0.0108846	-0.00435328	0.00740125						23.3367	6.61667	20.7533	4.96333	28.38	3.74333	35.09	7.49667	-1.83096	-2.24547	-3.20994	-2.78129	-0.646511	-0.597124	-0.232
TraesCS1A03G1079100	TraesCS1A02G442200	TraesCS1A01G442200																					7	black	208		0.00657218	-0.00500971	0.005026			A			2.87	1.18	2.20333	0.36	2.85333	0.106667	2.92	0.686667	-1.41197	-2.45226	-4.74298	-3.12052	-1.76626	-2.02613	-0.725965
TraesCS1A03G1079300	TraesCS1A02G442300	TraesCS1A01G442300	TRIAE_CS42_1AL_TGACv1_000659_AA0016580		Ta.20550.1.A1_at	123070997	LOC123070997	XP_044350382.1	flavonoid 3'-monooxygenase CYP75B3-like			BRADI_3g04750v3	hypothetical protein		Os10g0320100	OsF3'H	Similar to Flavonoid 3'-monooxygenase (EC 1.14.13.21) (Flavonoid 3'-hydroxylase) (Cytochrome P450 75B2)		AT5G07990	CYP75B1	TT7 [Source:UniProtKB/TrEMBL;Acc:A0A178UNZ9]		5	green	488		-0.0140304	-0.00218201	0.00138581						0.0533333	6.96	0.0933333	6.32	0	1.74667	0.0366667	6.47333	6.75227	7.208	7.94842	6.66117	-0.282983	-1.27884	-0.738731
TraesCS1A03G1080000	TraesCS1A02G442700	TraesCS1A01G442700	TRIAE_CS42_1AL_TGACv1_002322_AA0040840		TaAffx.81300.1.S1_at	123183616	LOC123183616	XP_044452214.1	uncharacterized protein LOC123183616														45	darkorange2			0.0062979	0.00580535	0.00111365						0.19	0	2.5	0.39	2.05667	0.87	5.61	0.556667	-1.55794	-2.46462	-0.952682	-3.17173	2.19122	0.91053	3.09794
TraesCS1A03G1082000	TraesCS1A02G444200	TraesCS1A01G444200	TRIAE_CS42_1AL_TGACv1_000492_AA0013390	Traes_1AL_F4FE96E3B	Ta.10838.2.A1_x_at	123071108	LOC123071108	XP_044350534.1	uncharacterized protein LOC123071108 isoform X1			BRADI_2g14220v3	hypothetical protein		Os05g0595300	CRCT	NRR alternative splicing variant, Regulation of root development in response to macronutrient deficienc						12	tan	64		-0.0159272	-0.000250146	-0.00299436						11.5167	65.71	12.4467	148.813	6.78333	44.7367	12.8233	109.563	2.32563	3.32869	2.66377	2.63115	0.975596	-0.957959	-0.0274616
TraesCS1A03G1082100	TraesCS1A02G444300	TraesCS1A01G444300	TRIAE_CS42_1AL_TGACv1_000492_AA0013410	Traes_1AL_1538AC680	TaAffx.84940.1.S1_at	123071123	LOC123071123	XP_044350553.1	nucleoside diphosphate kinase 3-like			BRADI_2g14210v3	hypothetical protein		Os05g0595400	OsNDPK3	Nucleoside diphosphate kinas		AT4G11010	NDPK3	Nucleoside diphosphate kinase [Source:UniProtKB/TrEMBL;Acc:A0A178UTZ0]		1	turquoise	628		-0.00352586	0.00800086	-0.00251414						0.376667	1.26333	0.503333	1.16	0.366667	5.48333	0.846667	1.51	1.32924	1.2544	4.02793	0.509949	0.315045	2.23718	0.389884
TraesCS1B03G0001600	TraesCS1B02G000600	TraesCS1B01G000600	TRIAE_CS42_1BS_TGACv1_050019_AA0166050	Traes_1BS_71C6FDF1A	Ta.28123.1.S1_at	123102343	LOC123102343	XP_044379588.1	50S ribosomal protein L28, chloroplastic-like			BRADI_2g40040v3	PRPL28 [Source:Projected from Arabidopsis thaliana (AT2G33450) UniProtKB/TrEMBL;Acc:A0A178VYG9]		Os05g0101400		Similar to 50S ribosomal protein L28, chloroplast precursor		AT2G33450	RPL28	PRPL28 [Source:UniProtKB/TrEMBL;Acc:A0A178VYG9]		1	turquoise			0.00107073	0.00575828	-0.0049272						37.4733	84.7567	68.7067	37.54	47.9667	123.45	95.8567	39.1833	1.05705	-1.12735	1.56363	-1.85184	-1.33879	2.28341	0.84561
TraesCS1B03G0003200	TraesCS1B02G001700	TraesCS1B01G001700	TRIAE_CS42_1BS_TGACv1_050538_AA0173170	Traes_1BS_388868A7B	TaAffx.110437.1.S1_at	123102416	LOC123102416	XP_044379702.1	cytochrome P450 72A14-like														17	grey60			-0.00404395	-0.0219195	-0.00775848						8.46667	30.0433	5.36667	7.18667	1.21333	0.26	1.22	1.87667	1.70511	0.251162	-1.72998	0.264961	-2.16875	-2.14382	-0.714802
TraesCS1B03G0003300	TraesCS1B02G001800	TraesCS1B01G001800	TRIAE_CS42_1BS_TGACv1_050538_AA0173160	Traes_1BS_A774414FD		123102426	LOC123102426	XP_044379713.1	putative phospholipid-transporting ATPase 9			BRADI_2g40060v3	hypothetical protein		Os05g0100600		Similar to aminophospholipid ATPase						5	green	422		-0.0100552	-0.0107054	0.00229818						5.97333	22.6567	6.01	21.1567	4.10667	4.60333	2.24333	20.39	1.79471	1.59819	-0.0524678	2.66136	-0.252631	-1.84845	-0.0561165
TraesCS1B03G0008600	TraesCS1B02G004100	TraesCS1B01G004100	TRIAE_CS42_1BS_TGACv1_049695_AA0159810	Traes_1BS_C4B727779	TaAffx.12214.1.S1_at	123083165	LOC123083165	XP_044361219.1	wall-associated receptor kinase 1-like	Snn1													4	yellow	547		-0.00824211	-0.00149605	0.0154533						0	1.50333	0	0.483333	0.0266667	0.28	0	7.36667	7.2989	6.71946	3.32389	10.2129	-1.57697	-4.7657	-0.997591
TraesCS1B03G0016800	TraesCS1B02G008700	TraesCS1B01G008700																					40	mediumpurple3	3		-0.0143045	-0.00367675	-0.00621539						0.0966667	8.01333	0.216667	12.2767	0	1.53667	0.07	4.28	6.46051	6.48408	7.98907	8.80439	0.0085826	-0.946331	-0.0149979
TraesCS1B03G0016900	TraesCS1B02G008800	TraesCS1B01G008800	TRIAE_CS42_1BS_TGACv1_049876_AA0163360	Traes_1BS_6D0A7765A																			4	yellow			-0.0070213	0.00669664	0.0156886						0	0.163333	0	0.0833333	0.176667	3.66667	0.02	8.17667	4.70899	6.98619	4.52957	8.34785	0.103265	-1.15119	-2.174
TraesCS1B03G0017300	TraesCS1B02G009000	TraesCS1B01G009000	TRIAE_CS42_1BS_TGACv1_049876_AA0163320	Traes_1BS_647FD2E85		123083480	LOC123083480	XP_044361453.1	probable leucine-rich repeat receptor-like protein kinase At1g35710														47	bisque4	21		-0.00717774	-0.00414401	-0.00188644						0.0166667	2.47667	0	3.37333	0.113333	0.0833333	0.133333	1.35667	4.93216	5.8024	-0.425263	2.72417	0.222214	-2.20869	-0.648041
TraesCS1B03G0018000	TraesCS1B02G009500	TraesCS1B01G009500	TRIAE_CS42_1BS_TGACv1_049356_AA0150260	Traes_1BS_3E4052CF2		123102247	LOC123102247	XP_044379483.1	MDIS1-interacting receptor like kinase 2-like			BRADI_3g21274v3	hypothetical protein										12	tan	96		-0.00917424	-0.00297257	-0.000903681						0.0166667	2.76	0.0666667	3.70333	0	0.476667	0	2.41667	6.15956	5.86683	5.59269	9.02113	-0.125561	-1.8875	0.167164
TraesCS1B03G0018500	TraesCS1B02G009800	TraesCS1B01G009800				123083513	LOC123083513	XP_044361478.1	MDIS1-interacting receptor like kinase 2-like														49	plum2			-0.0179158	0.0117749	0.0100908						0.103333	5.2	0.0766667	9.16333	1.03333	22.0067	0.553333	35.1633	6.03272	6.87029	4.19623	5.76828	0.248626	-0.390811	-0.588957
TraesCS1B03G0019200	TraesCS1B02G010200	TraesCS1B01G010200	TRIAE_CS42_1BS_TGACv1_049356_AA0150130	Traes_1BS_A2137387F		123102266	LOC123102266	XP_044379500.1	probable leucine-rich repeat receptor-like protein kinase At1g35710														47	bisque4	7		-0.0113866	-0.00765506	-0.00422607						0.163333	6.61667	0.0733333	8.88333	0.0466667	0.2	0.136667	2.86	6.00989	6.18635	1.64625	5.2977	0.240044	-3.2935	0.0635682
TraesCS1B03G0020700	TraesCS1B02G011100	TraesCS1B01G011100	TRIAE_CS42_U_TGACv1_641583_AA2098780	Traes_1BS_F7B1A6268	TaAffx.85083.1.S1_at	123102956	LOC123102956	XP_044380375.1	photosynthetic NDH subunit of lumenal location 5, chloroplastic-like	CYP20-2,CYP20-a,TaCYP20-a		BRADI_2g39950v3	Peptidyl-prolyl cis-trans isomerase [Source:Projected from Arabidopsis thaliana (AT5G13120) UniProtKB/TrEMBL;Acc:A0A178UN74]		Os05g0103200	OsCYP20-2	Cyclophilin-like domain containing protein		AT5G13120	PNSL5	Peptidyl-prolyl cis-trans isomerase [Source:UniProtKB/TrEMBL;Acc:A0A178UN74]		11	greenyellow			-0.00418366	0.00458944	-0.00484309						33.9867	63.9767	55.28	66.4067	26.0533	109.217	53.9833	70.8667	0.811998	0.135625	2.16646	-0.191959	-0.0409531	1.31543	0.635419
TraesCS1B03G0035800	TraesCS1B02G017300	TraesCS1B01G017300	TRIAE_CS42_1BS_TGACv1_049504_AA0155280	Traes_1BS_587F929ED	TaAffx.51433.1.S1_x_at	123083930	LOC123083930	XP_044361727.1	polygalacturonase inhibitor-like			BRADI_2g39830v3	hypothetical protein										27	white			0.00687774	-0.00438942	-0.000606836						1.38	0.666667	5.01667	0.0866667	1.17333	0.14	2.81333	0.39	-0.866195	-6.00539	-3.8895	-3.50301	-3.04836	-1.75132	2.09083
TraesCS1B03G0036700	TraesCS1B02G017700	TraesCS1B01G017700	TRIAE_CS42_1BS_TGACv1_051495_AA0180100	Traes_1BS_484C586DD		123103248	LOC123103248	XP_044380712.1	defensin Tk-AMP-D2-like	PDF8,TaPDF8,defensin													1	turquoise	740		-0.00401487	0.0112902	-0.00456715						0	0.0833333	0.0766667	0.493333	0	5.25667	0	0.67	1.43151	3.92709	6.28162	4.2524	2.45982	3.77232	-0.0357855
TraesCS1B03G0036800	TraesCS1B02G017800	TraesCS1B01G017800	TRIAE_CS42_1BS_TGACv1_051495_AA0180110	Traes_1BS_B67548763	Ta.28419.1.S1_at	123103256	LOC123103256	XP_044380725.1	methionine S-methyltransferase-like isoform X1			BRADI_2g39790v3	hypothetical protein		Os05g0105000		Similar to Methionine S-methyltransferase (EC 2.1.1.12) (AdoMet:Met S- methyltransferase) (Hv-MMT1)		AT5G49810	MMT1	Methionine S-methyltransferase [Source:UniProtKB/Swiss-Prot;Acc:Q9LTB2]		10	purple			-0.00730029	-0.00539309	0.00763342						20.4633	59.3367	12.6767	33.1267	31.2033	17.98	7.04667	48.2467	1.45954	1.15906	-0.766577	2.24281	-1.01135	-0.917631	-0.710864
TraesCS1B03G0038000	TraesCS1B02G018500	TraesCS1B01G018500	TRIAE_CS42_1BS_TGACv1_049494_AA0154780			123084068	LOC123084068	XP_044361798.1	G-type lectin S-receptor-like serine/threonine-protein kinase At2g19130														35	sienna3	10		-0.00432156	-0.00128518	-0.00354977						0.74	1.77667	0.53	2	0.46	1.25667	0.16	1.09	1.39521	2.02038	1.2269	3.07896	-0.346852	0.384743	-0.972018
TraesCS1B03G0038600	TraesCS1B02G018900	TraesCS1B01G018900	TRIAE_CS42_1BS_TGACv1_049967_AA0164910	Traes_1BS_324029B4E	Ta.6789.1.S1_x_at	123103302	LOC123103302	XP_044380771.1	ras-related protein RABA2a-like			BRADI_2g39770v3	hypothetical protein		Os05g0105100	OsRab11A2	Similar to Small GTPase rab11-related		AT1G09630	RABA2A	Ras-related protein RABA2a [Source:UniProtKB/Swiss-Prot;Acc:O04486]		14	cyan	7		-0.00829001	0.00284755	-0.0123453						5.21333	7.14667	4.00667	12.48	0.673333	16.5667	2.35667	6.46	0.417585	1.26595	5.06633	0.714432	0.678283	2.15824	-0.170082
TraesCS1B03G0040200	TraesCS1B02G019800	TraesCS1B01G019800	TRIAE_CS42_1BS_TGACv1_050351_AA0171040	Traes_1BS_C1C522D40	TaAffx.131227.1.S1_at	123103353	LOC123103353	XP_044380847.1	putative 12-oxophytodienoate reductase 5														18	lightgreen	2		-0.0136039	0.00866743	-0.0167432						0.37	2.83	0.276667	21.5633	0.293333	12.48	0.14	2.70333	2.93711	6.23015	5.64272	4.03942	2.48312	2.64525	-0.809929
TraesCS1B03G0041400	TraesCS1B02G020600	TraesCS1B01G020600	TRIAE_CS42_1BS_TGACv1_049380_AA0151300	Traes_1BS_EC27CC4EA		123103393	LOC123103393	XP_044380907.1	LEAF RUST 10 DISEASE-RESISTANCE LOCUS RECEPTOR-LIKE PROTEIN KINASE-like 2.4 isoform X2			BRADI_2g39720v3	hypothetical protein										36	yellowgreen			-0.0101266	-0.0308543	-0.0159589						27.4233	82.7433	14.7967	60.3267	2.17333	1.04333	0.843333	6.7	1.45939	1.64681	-1.34879	2.4105	-0.689015	-2.4334	-0.876442
TraesCS1B03G0041500	TraesCS1B02G020700	TraesCS1B01G020700	TRIAE_CS42_1BS_TGACv1_049380_AA0151310	Traes_1BS_177CE92ED		123103403	LOC123103403	XP_044380927.1	rust resistance kinase Lr10 isoform X2			BRADI_2g39710v3	hypothetical protein										36	yellowgreen	1		-0.00929871	-0.0296405	-0.0252407						13.2567	47.4867	7.99333	41.9533	0.17	0.146667	0.32	1.32333	1.70875	2.01406	-0.311151	2.08361	-0.443259	-2.06215	-0.748573
TraesCS1B03G0044200	TraesCS1B02G022300	TraesCS1B01G022300	TRIAE_CS42_1BS_TGACv1_052086_AA0181330	Traes_1BS_EF41B9A31	TaAffx.140851.1.S1_at	123103504	LOC123103504	XP_044381051.1	LEAF RUST 10 DISEASE-RESISTANCE LOCUS RECEPTOR-LIKE PROTEIN KINASE-like 2.3						Os01g0117600		Protein kinase, catalytic domain domain containing protein						6	red	150		-0.00883351	-0.0142633	0.00936124						15.9	39.5767	9.39	20.3467	7.62333	5.63667	3.68	39.8467	1.18355	0.888358	-0.75252	2.7984	-1.17865	-2.18665	-0.883457
TraesCS1B03G0044300	TraesCS1B02G022400	TraesCS1B01G022400	TRIAE_CS42_1BS_TGACv1_052086_AA0181320	Traes_1BS_32E191808	TaAffx.42397.1.S1_at	123103543	LOC123103543	XP_044381097.1	rust resistance kinase Lr10-like														36	yellowgreen	1		-0.0118156	-0.0258185	-0.0108936						29.2767	103.057	20.4133	114.833	4.08333	3.36667	2.66333	22.19	2.11143	1.82246	-3.30145	3.51374	-1.08435	-5.71153	-0.795379
TraesCS1B03G0062300	TraesCS1B02G031000	TraesCS1B01G031000	TRIAE_CS42_1BS_TGACv1_050126_AA0167850	Traes_1BS_372696711	Ta.25260.1.A1_at	123103877	LOC123103877	XP_044381507.1	protein DEHYDRATION-INDUCED 19 homolog 6-like			BRADI_2g39370v3	hypothetical protein		Os05g0107900	OsDi19-6	Similar to Protein DEHYDRATION-INDUCED 19 homolog 6						22	darkgreen			-0.000847135	0.00606605	-0.00635971						0.313333	1.57	2.96667	2.78	0.923333	3.82667	3.80667	1.91333	2.17325	-0.393432	2.20175	-1.76163	0.672874	2.02447	3.23956
TraesCS1B03G0067900	TraesCS1B02G033900	TraesCS1B01G033900	TRIAE_CS42_1BS_TGACv1_050120_AA0167660	Traes_1BS_2BCFB8A20	Ta.3114.1.S1_at	123103987	LOC123103987	XP_044381628.1	subtilisin-chymotrypsin inhibitor CI-1A-like			BRADI_2g39280v3	hypothetical protein										17	grey60	32		-0.00647318	-0.00969459	-0.00453303						0	14.0867	0	1.10333	0	0	0	0	7.30508	1.79242	0	0	-4.07703	0	1.43562
TraesCS1B03G0068000	TraesCS1B02G034000	TraesCS1B01G034000			Ta.24535.1.S1_at	123103992	LOC123103992	XP_044381640.1	subtilisin-chymotrypsin inhibitor-2A-like														17	grey60	37		-0.00270045	-0.0138969	-0.00572393						0.426667	14.7667	2.84667	0	0	0	0	0	7.57087	-4.89382	-0.943369	-2.44917	-8.1492	1.20803	4.31549
TraesCS1B03G0068600	TraesCS1B02G034500	TraesCS1B01G034500	TRIAE_CS42_1BS_TGACv1_050120_AA0167710			123104022	LOC123104022	XP_044381679.1	disease resistance protein RGA5-like														4	yellow	55		-0.00242063	0.00420474	0.0110954						0	0	0	0.0233333	0.486667	0.796667	0.263333	2.42667	1.01451	-0.452179	0.5283	2.48434	-0.175688	-1.30474	1.29101
TraesCS1B03G0068700	TraesCS1B02G034600	TraesCS1B01G034600	TRIAE_CS42_1BS_TGACv1_050120_AA0167720																				19	lightyellow	580		-0.00709201	-0.00475402	0.00247794						2.03	5.54667	2.71	5.73	1.82	3.20333	0.986667	7.41667	1.5102	0.819438	0.227491	3.09182	-0.0668958	-1.04369	0.623868
TraesCS1B03G0068800	TraesCS1B02G034700	TraesCS1B01G034700	TRIAE_CS42_1BS_TGACv1_050120_AA0167720																				40	mediumpurple3	3		-0.00849119	-0.0090621	-0.00591046						1.59	6.22333	2.96333	9.98333	1.03333	1.47333	0.176667	4.09333	1.73526	1.55798	0.436609	3.52848	0.504761	-1.3152	0.682039
TraesCS1B03G0069700	TraesCS1B02G035100	TraesCS1B01G035100	TRIAE_CS42_1BS_TGACv1_050596_AA0173790	Traes_1BS_FCCC2FA60											Os12g0548401		Similar to Proteinase inhibitor						1	turquoise	280		-0.00715043	0.00978896	-0.00146316						0.153333	3.42667	0	0	0	9.51333	0	1.50333	4.87519	0	8.42379	3.47752	-6.34023	3.85347	-1.88428
TraesCS1B03G0073400	TraesCS1B02G036700	TraesCS1B01G036700	TRIAE_CS42_1BS_TGACv1_051230_AA0178660			123104176	LOC123104176	XP_044381879.1	G-type lectin S-receptor-like serine/threonine-protein kinase At4g03230														33	darkolivegreen	10		0.00567709	0.0154366	0.0135893						0.0733333	0.02	0.0666667	0	5.90333	2.61333	7.5	1.61	-0.025742	-0.794715	-1.22257	-2.68727	-0.247096	1.03643	0.521877
TraesCS1B03G0074000	TraesCS1B02G036900	TraesCS1B01G036900	TRIAE_CS42_1BS_TGACv1_050680_AA0174340	Traes_1BS_3A4BE64C7		123104185	LOC123104185	XP_044381888.1	E3 ubiquitin-protein ligase RDUF1-like			BRADI_2g39220v3	hypothetical protein		Os05g0110000	OsRFP	Zinc finger, RING/FYVE/PHD-type domain containing protein						37	skyblue3			0.000820136	-0.0087021	0.00937809						62.2833	22.6933	49.3133	14.7833	39.1733	16.7567	8.60667	47.2633	-1.55556	-1.87935	-1.29535	1.94197	-0.727756	-1.01247	-0.403972
TraesCS1B03G0076300	TraesCS1B02G038100	TraesCS1B01G038100	TRIAE_CS42_1BS_TGACv1_050820_AA0175910	Traes_1BS_7949CB07A	TaAffx.55215.1.S1_at	123084925	LOC123084925	XP_044362405.1	PGR5-like protein 1A, chloroplastic			BRADI_2g39150v3	hypothetical protein		Os05g0110800		Conserved hypothetical protein		AT5G59400		FUNCTIONS IN: molecular_function unknown; INVOLVED IN: biological_process unknown; LOCATED IN: chloroplast; EXPRESSED IN: 23 plant structures; EXPRESSED DURING: 13 growth stages; BEST Arabidopsis thaliana protein match is: PGR5-like B (TAIR:AT4G1196 /.../Ha. [Source:TAIR;Acc:AT5G59400]		39	orangered4	130		-0.00671903	0.00259071	-0.000225513						2.04	8.69667	3.27333	10.68	4.72667	7.44333	2.69667	9.04333	2.28034	1.49586	0.710284	1.16247	0.233964	0.15255	1.01844
TraesCS1B03G0077900	TraesCS1B02G038700	TraesCS1B01G038700	TRIAE_CS42_1BS_TGACv1_050312_AA0170510	Traes_1BS_4A4C11587	TaAffx.81668.1.S1_at	123104352	LOC123104352	XP_044382119.1	protein NRT1/ PTR FAMILY 6.2-like			BRADI_2g41060v3	Protein NRT1/ PTR FAMILY 6.2 [Source:Projected from Arabidopsis thaliana (AT2G26690) UniProtKB/Swiss-Prot;Acc:Q9SZY4]						AT2G26690	NPF6.2	Protein NRT1/ PTR FAMILY 6.2 [Source:UniProtKB/Swiss-Prot;Acc:Q9SZY4]		8	pink	49		0.0110254	-0.0062225	0.00157911						22.1233	5.06	35.9167	5.66	17.4833	3.61667	31.8733	6.16333	-2.21934	-2.79875	-2.22883	-2.83936	0.0356059	-0.308907	0.615011
TraesCS1B03G0085000	TraesCS1B02G041400	TraesCS1B01G041400	TRIAE_CS42_1BS_TGACv1_052072_AA0181280	Traes_1BS_29549593B		123104529	LOC123104529	XP_044382338.1	xylan glycosyltransferase MUCI21-like			BRADI_2g13600v3	hypothetical protein		Os01g0498300		Glycosyltransferase AER61, uncharacterized domain containing protein		AT2G41640		At2g41640/T32G6.16 [Source:UniProtKB/TrEMBL;Acc:O22225]		4	yellow			-0.00213737	0.00117177	0.0177088						12.6233	5.31	9.9	3.31667	15.5233	13.8933	2.61333	37.4467	-1.50973	-1.88836	-0.277044	3.40373	-0.744001	-1.02514	-0.365362
TraesCS1B03G0086800	TraesCS1B02G042200	TraesCS1B01G042200	TRIAE_CS42_1BS_TGACv1_050552_AA0173280			123104584	LOC123104584	XP_044382396.1	metallothionein-like protein 2C						Os05g0111300	OsMT2b	Similar to B22EL8 protein						10	purple	67		-0.0103343	-0.0066413	0.00110611						0.473333	9.15667	0.876667	4.89667	0.266667	0.776667	0.51	5.31	3.46459	2.72488	1.4037	3.20647	-1.45419	-2.47594	-0.714482
TraesCS1B03G0086900	TraesCS1B02G042300	TraesCS1B01G042300	TRIAE_CS42_1BS_TGACv1_050552_AA0173290	Traes_1BS_06F3A2D5D	Ta.28831.1.S1_at							BRADI_2g38750v3	Outer envelope pore protein 16-1, chloroplastic [Source:Projected from Arabidopsis thaliana (AT2G28900) UniProtKB/Swiss-Prot;Acc:Q9ZV24]		Os05g0111200		Similar to Amino acid selective channel protein		AT2G28900	OEP161	Outer envelope pore protein 16-1, chloroplastic [Source:UniProtKB/Swiss-Prot;Acc:Q9ZV24]		1	turquoise	313		-0.000196468	0.00936312	-0.00340819						0.18	0.846667	0.77	0.15	0.696667	4.32333	0.806667	0.51	1.15927	-0.630093	2.61007	-0.382177	-1.91548	2.36695	-0.12612
TraesCS1B03G0089700	TraesCS1B02G043400	TraesCS1B01G043400			TaAffx.113329.1.S1_at	123085242	LOC123085242	XP_044362805.1	wall-associated receptor kinase 4-like			BRADI_5g25175v3	hypothetical protein										3	brown	370		-0.00492863	-0.00263808	0.0110129						0	1.38667	0	0.03	0	0	0.0266667	2.60667	7.98124	1.37809	1.56516	7.35943	-6.63889	-6.88706	0
TraesCS1B03G0090800	TraesCS1B02G043600	TraesCS1B01G043600	TRIAE_CS42_1BS_TGACv1_051812_AA0181010	Traes_1BS_F4FE961DC	Ta.9415.2.A1_a_at																		42	lightcyan1			0.000565922	-0.0116456	-0.013389						7.32333	5.57333	9.98333	7.01667	1.92333	1.85667	2.00667	1.65667	-0.0745812	-1.10128	-0.810678	-2.17365	-0.679927	1.21615	0.34677
TraesCS1B03G0095700	TraesCS1B02G050600	TraesCS1B01G050600	TRIAE_CS42_1BS_TGACv1_050837_AA0176130			123085306	LOC123085306	XP_044362865.1	lecithin-cholesterol acyltransferase-like 1						Os02g0589000		Lecithin:cholesterol acyltransferase family protein						1	turquoise			-0.00186053	0.0061763	-0.00928961						1.64667	6.48667	8.46333	9.14333	3.99333	12.7833	8.63667	4.38	1.57331	-0.152598	1.66645	-1.53603	0.381325	1.971	2.10723
TraesCS1B03G0097100	TraesCS1B02G044800	TraesCS1B01G044800	TRIAE_CS42_1BS_TGACv1_050467_AA0172460	Traes_1BS_23B7671F5	TaAffx.23026.1.S1_at	123104943	LOC123104943	XP_044382830.1	putative clathrin assembly protein At2g25430			BRADI_2g37120v3	hypothetical protein		Os05g0112101		Epsin-like, N-terminal domain containing protein						2	blue	4		-0.00376016	-0.00248523	0.00945638						1.73667	1.74667	0.636667	1.00667	1.17667	0.966667	0.28	4.14333	-0.277843	0.295892	-0.270294	3.34211	-0.758737	-1.70097	-1.33247
TraesCS1B03G0101000	TraesCS1B02G046200	TraesCS1B01G046200	TRIAE_CS42_1BS_TGACv1_050332_AA0170800	Traes_1BS_B00164D10	Ta.22426.1.S1_x_at	123085440	LOC123085440	XP_044363009.1	fatty-acid-binding protein 3, chloroplastic-like			BRADI_3g10937v3	hypothetical protein		Os02g0320300		Similar to Chalcone isomerase 3						26	darkorange	9		0.0103302	0.00218148	-0.00634074						23	9.74667	39.8233	9.41667	31.11	18.3433	45.8633	5.10333	-1.28896	-2.4028	-0.588478	-3.56619	-0.373272	2.31602	0.74057
TraesCS1B03G0108400	TraesCS1B02G048300	TraesCS1B01G048300	TRIAE_CS42_1BS_TGACv1_049914_AA0164140	Traes_1BS_7068F56E6	Ta.9220.3.S1_x_at	123105215	LOC123105215	XP_044383176.1	phenylalanine ammonia-lyase-like														2	blue	695		-0.00586798	-0.000441514	0.0083667						0.0733333	0.84	0.05	0.67	0.01	0.343333	0.04	3.12333	3.73367	3.8851	4.36015	6.73416	-0.45313	-2.6773	-0.604569
TraesCS1B03G0109800	TraesCS1B02G049200	TraesCS1B01G049200	TRIAE_CS42_1BS_TGACv1_050766_AA0175230	Traes_1BS_188DDFB56	Ta.14539.1.S1_at	123105264	LOC123105264	XP_044383251.1	soluble inorganic pyrophosphatase 4-like isoform X2			BRADI_2g37340v3	PPa4 [Source:Projected from Arabidopsis thaliana (AT3G53620) UniProtKB/TrEMBL;Acc:A0A178VKC0]		Os05g0114000		Similar to PRLI-interacting factor F (Fragment)						35	sienna3	98		-0.0063288	-4.22833e-05	-0.0017987						0.496667	2.64333	0.793333	1.95	0.133333	1.95	0.28	2.14	2.33707	1.13463	2.64133	2.10391	-0.459138	0.498856	0.743297
TraesCS1B03G0118900	TraesCS1B02G052600	TraesCS1B01G052600	TRIAE_CS42_1BS_TGACv1_049997_AA0165580			123085810	LOC123085810	XP_044363460.1	2'-deoxymugineic-acid 2'-dioxygenase-like														2	blue	645		-0.00685202	-0.00389226	0.0106646						0.456667	1.56333	0.186667	0.96	0.0666667	0.153333	0.0433333	5.18333	2.28764	1.19702	1.903	6.55199	-1.70698	-3.97076	-0.616365
TraesCS1B03G0119200	TraesCS1B02G052700	TraesCS1B01G052700	TRIAE_CS42_1BS_TGACv1_050569_AA0173420																				25	orange	1		0.0206719	-0.00971678	0.00715802						31.4933	0.146667	11.65	0.1	27.95	0.153333	7.81	0.15	-5.47779	-3.86242	-5.62703	-3.43149	0	0	-1.25736
TraesCS1B03G0134900	TraesCS1B02G057900	TraesCS1B01G057900	TRIAE_CS42_1BS_TGACv1_049818_AA0162110		Ta.27668.1.A1_at	123105831	LOC123105831	XP_044383928.1	dihydroneopterin aldolase 2-like			BRADI_3g42650v3	hypothetical protein						AT5G62980	FOLB2	Dihydroneopterin aldolase 2 [Source:UniProtKB/Swiss-Prot;Acc:Q9FM54]		26	darkorange			0.0053353	0.000309611	-0.00260942						16.68	7.99	19.0467	8.83667	12.9267	11.3133	22.7933	7.56	-1.18995	-1.35981	-0.214929	-2.07067	-0.0323539	1.07543	0.137506
TraesCS1B03G0139900	TraesCS1B02G059100	TraesCS1B01G059100	TRIAE_CS42_1BS_TGACv1_051062_AA0177560	Traes_1BS_F226DF9B4	Ta.22964.1.S1_a_at							BRADI_2g37480v3	hypothetical protein		Os05g0116100	OsDHAR1	Dehydroascorbate reductase		AT1G75270	DHAR2	Glutathione S-transferase DHAR2 [Source:UniProtKB/Swiss-Prot;Acc:Q9FRL8]		14	cyan	3		-0.00531788	0.00384564	-0.00789198						47.9933	91.4833	76.4867	109.727	37.9233	168.053	47.0033	79.4067	0.848388	0.452782	2.13784	0.233469	0.257334	1.56596	0.652941
TraesCS1B03G0142900	TraesCS1B02G059900	TraesCS1B01G059900	TRIAE_CS42_1BS_TGACv1_049470_AA0154330	Traes_1BS_C55011EE3	TaAffx.121172.1.S1_at	123105996	LOC123105996	XP_044384130.1	protein trichome birefringence-like 10														48	darkslateblue			0.00281302	0.00960984	0.000299882						1.32333	1.13667	2.55333	5.04	8.21667	5.19333	7.61333	2.65667	-0.380986	0.585466	-0.491659	-1.91914	2.11159	1.53782	1.14513
TraesCS1B03G0145000	TraesCS1B02G060500	TraesCS1B01G060500	TRIAE_CS42_1BS_TGACv1_049567_AA0157020	Traes_1BS_25DF6A270		123086120	LOC123086120	XP_044363772.1	uncharacterized protein LOC123086120 isoform X2														42	lightcyan1			0.00302406	-0.0117616	-0.00310428						5.08	2.52	5.91	1.65333	1.98	0.333333	0.933333	1.07667	-0.841212	-2.08826	-2.59104	0.0910861	-1.02943	-1.34923	0.217623
TraesCS1B03G0145400	TraesCS1B02G060700	TraesCS1B01G060700	TRIAE_CS42_1BS_TGACv1_049567_AA0157010	Traes_1BS_F42414E18	TaAffx.7973.2.S1_at	123106043	LOC123106043	XP_044384173.1	calcium-transporting ATPase 4, endoplasmic reticulum-type-like			BRADI_2g37570v3	hypothetical protein										12	tan	193		-0.0148674	-0.013565	-0.00360546						9.41	36.8067	9.00333	45.79	2.08	7.22667	1.33667	33.11	1.87676	2.17674	1.68203	3.91374	0.202894	-1.6572	-0.097087
TraesCS1B03G0150700	TraesCS1B02G061800	TraesCS1B01G061800	TRIAE_CS42_1BS_TGACv1_049754_AA0160900	Traes_1BS_0C3658B87		123086247	LOC123086247	XP_044363901.1	geraniol 8-hydroxylase-like			BRADI_3g35980v3	hypothetical protein		Os10g0351200		Similar to Cytochrome P450 family protein, expressed						3	brown	356		-0.00583598	-0.00253205	0.00881896						0.03	1.79	0.0466667	0.313333	0	0.173333	0	2.66333	5.42693	0.827088	4.03694	8.1069	-3.02761	-4.20097	1.57223
TraesCS1B03G0152300	TraesCS1B02G062300	TraesCS1B01G062300	TRIAE_CS42_1BS_TGACv1_049580_AA0157220		TaAffx.83378.1.S1_at	123106190	LOC123106190	XP_044384353.1	L-type lectin-domain containing receptor kinase SIT2-like			BRADI_1g57690v3	hypothetical protein		Os09g0268000		Similar to lectin-like receptor kinase 7						17	grey60			-0.00520465	-0.00703204	0.0013543						0.566667	3.17667	0.426667	1.04	0.0333333	0.12	0	1.29667	2.19947	1.1151	1.34889	4.54726	-1.44703	-3.52305	-0.362653
TraesCS1B03G0152600	TraesCS1B02G062400	TraesCS1B01G062400	TRIAE_CS42_1BS_TGACv1_049580_AA0157230		Ta.16417.1.S1_at	123086272	LOC123086272	XP_044363922.1	uncharacterized protein LOC123086272														6	red	249		-0.0109646	-0.0189135	0.0160168						8.29667	29.8833	4.32667	8.80667	3.5	0.69	0.63	35.89	1.45768	0.473848	-1.99356	5.52653	-1.97257	-4.93726	-0.988737
TraesCS1B03G0155900	TraesCS1B02G063800	TraesCS1B01G063800	TRIAE_CS42_1BS_TGACv1_050183_AA0168720	Traes_1BS_3E74E05A1		123086337	LOC123086337	XP_044364028.1	non-specific lipid transfer protein GPI-anchored 5-like			BRADI_1g55770v3	hypothetical protein		Os07g0175600	OsLTPG18	Plant lipid transfer protein and hydrophobic protein, helical domain containing protein						4	yellow	28		-0.00496295	0.00555556	0.0119211						0.0566667	0.07	0.156667	0.176667	0.0533333	1.28	0.276667	5.03667	0.136227	1.5122	3.57689	3.49695	0.599777	-1.11739	-0.776202
TraesCS1B03G0166000	TraesCS1B02G066700	TraesCS1B01G066700	TRIAE_CS42_1BS_TGACv1_050247_AA0169640	Traes_1BS_2F70D3EFB		123086479	LOC123086479	XP_044364186.1	pentatricopeptide repeat-containing protein At4g38150-like			BRADI_5g13440v3	hypothetical protein		Os06g0308200		Similar to 60S ribosomal protein L15						27	white			0.00483065	-0.00404699	-0.00277793						1.23333	0.05	3.63	0.41	0.66	0.06	1.25667	0.35	-3.14327	-3.39859	-0.916529	-3.38381	1.25975	0.668276	1.51508
TraesCS1B03G0172700	TraesCS1B02G068000	TraesCS1B01G068000	TRIAE_CS42_1BS_TGACv1_049530_AA0155990	Traes_1BS_392BB0480	Ta.21116.3.S1_at	123106544	LOC123106544	XP_044384612.1	WEB family protein At5g16730, chloroplastic-like			BRADI_2g37720v3	hypothetical protein										18	lightgreen			-0.00424559	-0.00150959	-0.00830998						1.08333	1.92333	2.10667	4.26	0.583333	2.52333	0.593333	1.57333	0.624458	0.714628	2.09949	0.600685	0.840925	1.17152	0.750755
TraesCS1B03G0174000	TraesCS1B02G068700	TraesCS1B01G068700	TRIAE_CS42_1BS_TGACv1_050895_AA0176490	Traes_1BS_8C0F2821A								BRADI_2g37675v3	hypothetical protein		Os05g0118800		Conserved hypothetical protein						14	cyan			-0.00206955	0.00266848	-0.00695652						1.18	2.32	1.74667	2.98333	1.06333	3.70333	1.76667	1.39	0.601229	0.173198	2.09924	-0.750404	0.0291839	1.84508	0.457214
TraesCS1B03G0181700	TraesCS1B02G071200	TraesCS1B01G071200	TRIAE_CS42_1BS_TGACv1_049392_AA0151940	Traes_1BS_0F6319D01	Ta.18845.1.S1_at	123106849	LOC123106849	XP_044384827.1	protein SENSITIVITY TO RED LIGHT REDUCED 1-like	SRR1-B1		BRADI_2g37730v3	hypothetical protein		Os05g0118000		SRR1 domain containing protein						27	white	1		0.0043621	-0.000256318	-0.0023514						2.87333	0.89	3.71667	1.72333	2.39333	1.77667	3.73333	1.21667	-1.7003	-1.50843	-0.143631	-2.31356	0.740848	1.52095	0.548976
TraesCS1B03G0187100	TraesCS1B02G073400	TraesCS1B01G073400	TRIAE_CS42_5BL_TGACv1_404424_AA1299430			123107086	LOC123107086	XP_044385026.1	uncharacterized protein LOC123107086														47	bisque4			-0.00377738	-0.0140215	-0.0225018						0.78	11.3067	7.06333	14.89	1.56667	0.236667	0.506667	0	3.57603	1.15681	-4.59331	-4.31836	0.265522	0.417133	2.68474
TraesCS1B03G0187700	TraesCS1B02G073900	TraesCS1B01G073900	TRIAE_CS42_1BS_TGACv1_050207_AA0169020	Traes_1BS_20BD939821								BRADI_3g47232v3	hypothetical protein										23	darkturquoise			0.00130915	-0.00111287	0.026695						22.7067	2.39333	14.9733	0.93	25.6533	10.41	1.10333	50.8067	-3.09986	-3.21518	-1.28611	4.67337	-1.15596	-1.39184	-1.04064
TraesCS1B03G0187800	TraesCS1B02G074000	TraesCS1B01G074000	TRIAE_CS42_1BS_TGACv1_050207_AA0169020	Traes_1BS_20BD939821		123107119	LOC123107119	XP_044385065.1	disease resistance protein Pik-1-like			BRADI_3g47200v3	hypothetical protein		Os02g0584800		Heavy metal transport/detoxification protein domain containing protein						38	plum1			0.00537442	0.00236461	0.018352						3.49	0.236667	6.34667	0.56	11.3933	2.09	2.76667	8.37	-4.74768	-5.19242	-2.41268	1.23372	-0.0891984	-1.21837	0.355552
TraesCS1B03G0188100	TraesCS1B02G074100	TraesCS1B01G074100	TRIAE_CS42_1BS_TGACv1_050329_AA0170790	Traes_1BS_67C7A106D		123107129	LOC123107129	XP_044385075.1	disease resistance protein Pik-1-like														20	royalblue			-0.00152961	-0.0152929	-0.00539554						16.1467	4.94	7.89	4.75	1.99667	2.03	0.09	3.23	-2.05776	-1.08067	0.213649	5.14387	-0.130381	0.306573	-1.10747
TraesCS1B03G0188600	TraesCS1B02G074300	TraesCS1B01G074300	TRIAE_CS42_1BS_TGACv1_050329_AA0170760	Traes_1BS_15DC56175	Ta.18739.1.A1_at							BRADI_4g19641v3	hypothetical protein		Os11g0412484		Hypothetical conserved gene						31	paleturquoise			0.00544728	-0.00684401	0.0114634						16.2133	15.3367	10.7133	3.36	21.8133	4.01333	12.9733	8.47667	-0.488971	-1.68584	-2.55958	-1.09503	-1.91966	-0.986143	-0.722788
TraesCS1B03G0192900	TraesCS1B02G076300	TraesCS1B01G076300	TRIAE_CS42_1BS_TGACv1_049682_AA0159520	Traes_1BS_E68807072		543013	LOC543013	XP_044385313.1	APETALA2-like protein 1 isoform X1	TOE1-B1,apetala2		BRADI_2g37800v3	hypothetical protein		Os05g0121600	RSR1	AP2/EREBP family transcription factor, Starch biosynthesi						7	black	195		0.0102101	-0.00448158	0.00715997			A			69.6467	21.8433	46.7633	8	64.4567	15.35	49.96	16.0633	-1.82345	-2.63453	-2.10356	-2.17715	-1.40465	0.387784	-0.593573
TraesCS1B03G0194400	TraesCS1B02G077300	TraesCS1B01G077300	TRIAE_CS42_1BS_TGACv1_049692_AA0159740	Traes_1BS_F5E892762	Ta.650.1.A1_at	123107460	LOC123107460	XP_044385382.1	D-ribulose kinase-like			BRADI_1g52670v3	D-ribulose kinase [Source:Projected from Arabidopsis thaliana (AT2G21370) UniProtKB/Swiss-Prot;Acc:Q8L794]		Os07g0409200		Carbohydrate kinase, FGGY domain containing protein		AT2G21370	XK-1	D-ribulose kinase [Source:UniProtKB/Swiss-Prot;Acc:Q8L794]		43	ivory			0.00800252	-0.00265763	-0.005441						7.83	6.95667	21.79	5.64	9.04333	4.21333	25.0633	2.88	-0.347044	-1.96802	-1.03916	-3.37359	-0.351005	0.971184	1.26997
TraesCS1B03G0195500	TraesCS1B02G077600	TraesCS1B01G077600	TRIAE_CS42_1BS_TGACv1_050344_AA0170930	Traes_1BS_427D088971	TaAffx.12155.1.A1_at	123107477	LOC123107477	XP_044385404.1	adenine/guanine permease AZG1-like			BRADI_2g30850v3	AZG1 [Source:Projected from Arabidopsis thaliana (AT3G10960) UniProtKB/TrEMBL;Acc:A0A178VPT2]		Os05g0332600		Xanthine/uracil/vitamin C permease family protein		AT3G10960	AZG1	AZG1 [Source:UniProtKB/TrEMBL;Acc:A0A178VPT2]		3	brown	519		-0.00410831	-0.0023793	0.00585516						0.663333	1.85667	0.693333	1.02333	0.636667	0.656667	0.38	2.83	1.56318	0.0529104	-0.149689	2.52518	-1.57332	-1.64757	-0.0630488
TraesCS1B03G0203400	TraesCS1B02G080800	TraesCS1B01G080800	TRIAE_CS42_1BS_TGACv1_050883_AA0176420	Traes_1BS_7CE4FC114	Ta.10133.1.S1_x_at	123086971	LOC123086971	XP_044364777.1	uncharacterized protein LOC123086971						Os03g0369100	OsLTPL36	Bifunctional inhibitor/plant lipid transfer protein/seed storage domain containing protein						27	white	11		0.00828162	-0.0045955	-0.00218927						2.14	0.506667	3.66667	0	1.09667	0.103333	3.27333	0	-2.63698	-7.84545	-4.08036	-7.45049	-4.18621	2.05075	1.02228
TraesCS1B03G0205900	TraesCS1B02G081900	TraesCS1B01G081900	TRIAE_CS42_1BS_TGACv1_049599_AA0157480	Traes_1BS_3C7F75D5F		123107778	LOC123107778	XP_044385634.1	probable beta-1,4-xylosyltransferase GT43A			BRADI_2g37970v3	hypothetical protein		Os05g0123100	OsGT43A	Glycosyl transferase, family 43 protein						16	lightcyan	65		-0.00636521	0.00361128	-0.00504159						7.39333	9.43667	5.99667	18.86	4.87333	19.5467	5.19333	13.29	0.252634	1.475	2.02813	1.01765	0.676605	1.01297	-0.545758
TraesCS1B03G0212900	TraesCS1B02G083400	TraesCS1B01G083400	TRIAE_CS42_1BS_TGACv1_050776_AA0175370	Traes_1BS_081FAB9CA		123107986	LOC123107986	XP_044385799.1	LEC14B protein-like			BRADI_2g13223v3	hypothetical protein										12	tan	409		-0.00867595	-4.66631e-05	0.00018432						1.56333	6.53667	2.21333	8.44667	1.51333	4.4	1.82667	9.19333	1.91306	1.59852	1.31278	2.04894	0.0734891	-0.767489	0.388021
TraesCS1B03G0216400	TraesCS1B02G084700	TraesCS1B01G084700	TRIAE_CS42_1BS_TGACv1_050322_AA0170640	Traes_1BS_15C828137	Ta.20528.1.A1_at	123108104	LOC123108104	XP_044385895.1	dihydrolipoyl dehydrogenase 1, mitochondrial-like			BRADI_2g12310v3	hypothetical protein										13	salmon			0.00500451	-0.00748635	-0.0166443						35.34	50.0367	114.28	54.9567	21.6367	18.2767	84.6033	10.5233	0.39578	-1.34347	-0.0854603	-3.43307	-0.125621	1.28043	1.61362
TraesCS1B03G0217600	TraesCS1B02G085200	TraesCS1B01G085200	TRIAE_CS42_1BS_TGACv1_051280_AA0178950	Traes_1BS_23156BD3C	Ta.18848.1.S1_at	123108204	LOC123108204	XP_044385973.1	protein SEEDLING PLASTID DEVELOPMENT 1-like			BRADI_1g55007v3	P-loop containing nucleoside triphosphate hydrolases superfamily protein [Source:Projected from Arabidopsis thaliana (AT3G10420) UniProtKB/TrEMBL;Acc:F4J3R7]		Os07g0187400		ATPase, AAA-type, core domain containing protein		AT3G10420	SPD1	P-loop containing nucleoside triphosphate hydrolases superfamily protein [Source:UniProtKB/TrEMBL;Acc:F4J3R7]		10	purple	320		-0.0107813	-0.00398353	0.00482304						33.83	174.85	28.8033	143.29	46.83	56.2033	25.81	159.403	2.21779	1.98891	0.286268	2.09043	-0.480366	-1.05281	-0.251483
TraesCS1B03G0232000	TraesCS1B02G088400	TraesCS1B01G088400	TRIAE_CS42_U_TGACv1_640692_AA2068850	Traes_1BS_D2F76B19C	TaAffx.31317.1.S1_at	123087389	LOC123087389	XP_044365330.1	uncharacterized protein LOC123087389			BRADI_2g38237v3	hypothetical protein		Os05g0128100		Hypothetical conserved gene						22	darkgreen			0.00272756	0.00259382	-0.00520375						14.34	16.6733	27.6133	13.34	10.3767	23.5967	40.47	12.8567	0.102385	-1.31253	1.1596	-2.32424	-0.416178	1.45635	0.998737
TraesCS1B03G0235500	TraesCS1B02G088900	TraesCS1B01G088900	TRIAE_CS42_1BS_TGACv1_050906_AA0176590	Traes_1BS_EF67E5A24	TaAffx.128663.1.S1_at	100049024	LOC100049024	XP_044386342.1	probable WRKY transcription factor 26	WRKY,WRKY53-a		BRADI_2g00280v3	hypothetical protein		Os05g0343400	WRKY53	WRKY transcription factor, Disease resistance, Defense respons						41	lightsteelblue1			-0.00901139	-0.00968243	0.00237306						62.2633	48.41	31.8533	24.4567	15.2433	37.9367	1.64667	64.7567	-0.476205	-0.568967	1.14824	4.81115	-1.11944	-0.313875	-1.02668
TraesCS1B03G0235600	TraesCS1B02G089000	TraesCS1B01G089000	TRIAE_CS42_1BS_TGACv1_050395_AA0171570	Traes_1BS_D5E16C471	TaAffx.111048.1.S1_at	123109698	LOC123109698	XP_044386343.1	nicotianamine aminotransferase 1-like			BRADI_4g16430v3	hypothetical protein										3	brown	291		-0.00884362	-0.0022223	0.0100542						0.153333	4.12333	0.193333	0.876667	0.0166667	0.84	0.27	5.59667	3.84889	1.51967	3.73061	4.13709	-1.97045	-2.05372	0.35878
TraesCS1B03G0235700	TraesCS1B02G089100	TraesCS1B01G089100	TRIAE_CS42_1BS_TGACv1_051537_AA0180290	Traes_1BS_29617D1FC	Ta.22231.1.S1_at	123109730	LOC123109730	XP_044386346.1	putative serine/threonine-protein kinase-like protein CCR3			BRADI_2g38200v3	Putative serine/threonine-protein kinase-like protein CCR3 [Source:Projected from Arabidopsis thaliana (AT3G55950) UniProtKB/Swiss-Prot;Acc:Q9LY50]		Os05g0127300	OsCRR3	Serine/threonine protein kinase domain containing protein		AT3G55950	CCR3	Putative serine/threonine-protein kinase-like protein CCR3 [Source:UniProtKB/Swiss-Prot;Acc:Q9LY50]		4	yellow	24		-0.00282166	0.00230064	0.0139125						2.74667	2.10333	5.06	1.63667	5.04	5.05	1.02333	15.0267	-0.652395	-1.74367	0.196195	3.40598	-0.35682	-1.0065	0.734451
TraesCS1B03G0246000	TraesCS1B02G092400	TraesCS1B01G092400	TRIAE_CS42_1BS_TGACv1_050141_AA0168020	Traes_1BS_835A825DC	Ta.9484.1.S1_at	123110209	LOC123110209	XP_044386622.1	annexin D5-like														20	royalblue			0.00846296	-0.00539291	0.000999568						10.1067	1.25667	5	0.643333	4.54	1.49	2.87333	0.816667	-2.90887	-2.98113	-1.35551	-2.46009	-0.878126	1.7313	-0.805859
TraesCS1B03G0248700	TraesCS1B02G093400	TraesCS1B01G093400	TRIAE_CS42_1BS_TGACv1_050747_AA0175030	Traes_1BS_0A1C78511		123110241	LOC123110241	XP_044386654.1	uncharacterized protein LOC123110241			BRADI_2g38470v3	hypothetical protein		Os05g0131900		Hypothetical conserved gene						1	turquoise	256		0.000334731	0.0123583	-0.00878359						1.60333	1.60667	3.27333	2.97	2.33667	16.0567	5.25333	1.85	-0.0892496	-0.427258	2.43263	-1.71627	0.491963	3.48075	0.829972
TraesCS1B03G0254600	TraesCS1B02G095000	TraesCS1B01G095000	TRIAE_CS42_1BS_TGACv1_051592_AA0180550	Traes_1BS_58B4D7271	Ta.25294.1.S1_at	123110532	LOC123110532	XP_044387011.1	uncharacterized protein LOC123110532			BRADI_2g10880v3	hypothetical protein										18	lightgreen	3		-0.0107197	0.00399102	0.00154192						3.28	8.33333	0.623333	16.3067	7.07	10.9333	0.546667	9.76667	1.2288	4.47533	0.801245	3.07883	0.793763	0.784695	-2.45277
TraesCS1B03G0259900	TraesCS1B02G096900	TraesCS1B01G096900	TRIAE_CS42_1BS_TGACv1_049881_AA0163500	Traes_1BS_8A9C9C25B	Ta.17325.1.S1_at	123087684	LOC123087684	XP_044365688.1	peroxidase 5-like			BRADI_2g37000v3	hypothetical protein		Os05g0135500	prx71	Haem peroxidase family protein						26	darkorange			0.00637156	0.00206476	0.00274121						0.353333	0.276667	2.16333	0.26	2.33667	0.316667	3.41333	0.523333	-0.305406	-3.04272	-2.94375	-3.22667	-0.109041	-0.248064	2.62828
TraesCS1B03G0260500	TraesCS1B02G097200	TraesCS1B01G097200	TRIAE_CS42_1BS_TGACv1_050249_AA0169680	Traes_1BS_2E8EE06AF	Ta.26344.1.A1_at	123110696	LOC123110696	XP_044387224.1	probable glutathione S-transferase GSTF1			BRADI_2g13110v3	hypothetical protein						AT3G62760	GSTF13	Glutathione S-transferase F13 [Source:UniProtKB/Swiss-Prot;Acc:Q9LZI9]		16	lightcyan	139		-0.00900363	0.00442455	-0.00529003						11.3933	52.8967	36.1333	64.38	13.2967	71.9667	20.8167	66.6033	2.08792	0.739486	2.63237	1.03436	0.200194	0.798462	1.54863
TraesCS1B03G0262900	TraesCS1B02G097800	TraesCS1B01G097800	TRIAE_CS42_1BS_TGACv1_049375_AA0151110	Traes_1BS_A43C87800		123110807	LOC123110807	XP_044387358.1	nuclear envelope-associated protein 2-like			BRADI_2g36970v3	hypothetical protein		Os05g0135900		Spectrin repeat containing protein						12	tan	46		-0.00786797	-0.0028168	-0.000565097						2.67	5.09667	2.31333	7.97	2.61667	4.66	0.343333	6.55	0.557663	1.52667	0.653541	3.60731	0.500494	-0.0588316	-0.468514
TraesCS1B03G0263000	TraesCS1B02G097900	TraesCS1B01G097900	TRIAE_CS42_1BS_TGACv1_049375_AA0151120	Traes_1BS_4E2FA3101		123041829	LOC123041829	XP_044320323.1	histone H4			BRADI_1g68190v3	hypothetical protein		Os07g0549900		Similar to Histone H4		AT5G59970		Histone H4 [Source:UniProtKB/TrEMBL;Acc:Q6NR90]		22	darkgreen			0.0025517	0.00601115	0.00178435						3.49	5.07667	5.29667	2.80667	5.21333	10.12	11.0833	4.27333	0.653241	-0.334472	2.47962	-1.67798	0.429526	2.45559	1.41724
TraesCS1B03G0264000	TraesCS1B02G098600	TraesCS1B01G098600	TRIAE_CS42_1BS_TGACv1_050098_AA0167360	Traes_1BS_F0520EC18	Ta.15747.1.S1_at	123087736	LOC123087736	XP_044365773.1	CBL-interacting protein kinase 17-like														35	sienna3			-0.00373539	0.000101051	-0.0060897						1.06667	4.81	2.84667	2.50667	1.26	3.94	0.94	1.78667	2.18324	-0.405236	1.64107	0.529175	-1.17414	1.49719	1.41434
TraesCS1B03G0269500	TraesCS1B02G100100	TraesCS1B01G100100			Ta.12995.1.S1_at	123110974	LOC123110974	XP_044387568.1	hydrophobic protein LTI6B			BRADI_2g36770v3	hypothetical protein						AT3G05880	RCI2A	RCI2A [Source:UniProtKB/TrEMBL;Acc:A0A178V7D5]		20	royalblue			0.00834262	-0.0129208	0.0106763						270.573	37.7867	193.2	26.0333	155.553	25.48	40.2033	66.5267	-2.91857	-3.07251	-2.76845	0.134115	-0.699007	-0.9814	-0.545066
TraesCS1B03G0270100	TraesCS1B02G100400	TraesCS1B01G100400	TRIAE_CS42_1BS_TGACv1_049601_AA0157510	Traes_1BS_D1FCBFBE8	TaAffx.83500.1.S1_at	123110986	LOC123110986	XP_044387579.1	transcription factor APG-like isoform X2			BRADI_2g36740v3	Helix-loop-helix DNA-binding domain containing protein [Source: Projected from Oryza sativa (Os05g0139100)]										44	floralwhite	186		-0.00467081	0.00799524	-0.000924131						0.0633333	0.456667	0.156667	0.76	0.0466667	3.16667	0.3	1.49667	2.26904	2.08766	6.22472	2.37269	1.17327	1.67191	1.35465
TraesCS1B03G0273300	TraesCS1B02G101500	TraesCS1B01G101500	TRIAE_CS42_1BS_TGACv1_050166_AA0168410	Traes_1BS_931C293A4		123087907	LOC123087907	XP_044365964.1	benzyl alcohol O-benzoyltransferase-like			BRADI_2g36670v3	hypothetical protein		Os05g0141300		Transferase family protein						34	darkmagenta	145		-0.0062394	0.00134975	0.00208866						0.0766667	1.02333	0.11	1.37333	0.0333333	0.91	0.09	2.20333	3.43942	2.69107	4.82013	4.48723	-0.158106	-0.4501	0.590234
TraesCS1B03G0274400	TraesCS1B02G101900	TraesCS1B01G101900	TRIAE_CS42_1BS_TGACv1_050444_AA0172180	Traes_1BS_8830AE5A6								BRADI_2g36620v3	hypothetical protein										6	red	77		-0.00520151	-0.00846805	0.00886459						1.19333	3.89667	1.42	0.76	0.0966667	0.156667	0.416667	4.35667	1.61092	0.387589	0.232937	2.92059	-1.20682	-3.01706	0.0165036
TraesCS1B03G0274600	TraesCS1B02G102000	TraesCS1B01G102000	TRIAE_CS42_1BS_TGACv1_050226_AA0169180		Ta.22272.1.S1_at	123165602	LOC123165602	XP_044439220.1	uncharacterized protein LOC123165602						Os05g0142100		Conserved hypothetical protein						3	brown	555		-0.0124275	-0.0137318	0.0155822						7.19	64.4	7.61667	31.02	6.94	2.46667	6.48	88.7267	3.06076	1.77198	-1.26788	3.42337	-1.1288	-4.50371	0.159974
TraesCS1B03G0290200	TraesCS1B02G107600	TraesCS1B01G107600	TRIAE_CS42_1BS_TGACv1_050010_AA0165890	Traes_1BS_998F2E806		123111541	LOC123111541	XP_044388313.1	probable sucrose-phosphatase 3 isoform X2			BRADI_2g36350v3	hypothetical protein										2	blue	536		-0.00799039	-0.00347463	0.0111692						1.37333	4.25	0.846667	1.91667	0.566667	1.29	0.626667	9.55667	1.45101	1.05422	0.901771	3.88073	-1.30825	-2.57573	-0.911466
TraesCS1B03G0291200	TraesCS1B02G108400	TraesCS1B01G108400	TRIAE_CS42_1BS_TGACv1_050421_AA0171880	Traes_1BS_C1EFCC3E3	TaAffx.85983.1.S1_at	123088083	LOC123088083	XP_044366179.1	GDSL esterase/lipase At1g28600-like						Os10g0393800	OsGELP105	Lipase, GDSL domain containing protein						14	cyan	127		-0.00787501	0.00426022	-0.00670597						0.51	2.74	1.65	4.41333	0.25	5.25333	0.74	3.50667	1.78358	1.32491	3.89782	1.76418	0.750094	0.953175	1.20876
TraesCS1B03G0293800	TraesCS1B02G109400	TraesCS1B01G109400	TRIAE_CS42_1BS_TGACv1_051121_AA0177900	Traes_1BS_C8A500342	TaAffx.84937.1.S1_at	123180435	LOC123180435	XP_044448427.1	serine/threonine-protein kinase RIPK-like			BRADI_3g37600v3	hypothetical protein		Os08g0457400	OsRLCK255	Similar to Avr9/Cf-9 induced kinase 1						23	darkturquoise			-0.00521733	-0.0092697	0.00726478						14.3233	8.71333	15.6033	7.02333	7.6	7.57667	0.716667	24.37	-0.940998	-1.44894	-0.216444	5.16358	-0.523119	-1.23466	-0.0151725
TraesCS1B03G0294900	TraesCS1B02G109700	TraesCS1B01G109700	TRIAE_CS42_1BS_TGACv1_050124_AA0167790																				36	yellowgreen			-0.0039515	-0.00968157	-0.00808161						1.38667	3.96667	0.07	2.61	0	0	0	0	0.796328	2.88603	0.74456	0	-1.25046	1.20802	-3.34016
TraesCS1B03G0295000	TraesCS1B02G109800	TraesCS1B01G109800	TRIAE_CS42_1BS_TGACv1_050124_AA0167780			123111658	LOC123111658	XP_044388450.1	uncharacterized protein LOC123111658 isoform X3														36	yellowgreen	1		-0.00483864	-0.0136591	-0.0134987						2.14	6.38	0.673333	5.06	0	0	0	0	1.15394	2.46575	-1.14283	0	-0.543842	0	-1.85566
TraesCS1B03G0298200	TraesCS1B02G110600	TraesCS1B01G110600	TRIAE_CS42_1BS_TGACv1_050305_AA0170400		TaAffx.51035.1.S1_at																		5	green	22		-0.00841925	-0.00709775	-0.00162245						1.76	6.34667	1.26	5.23667	0.653333	1.54333	0.253333	3.92667	1.7867	1.99982	1.30984	3.64887	-0.496845	-1.02082	-0.709964
TraesCS1B03G0302000	TraesCS1B02G111300	TraesCS1B01G111300	TRIAE_CS42_1BS_TGACv1_050004_AA0165710	Traes_1BS_48978FD3C1		123111981	LOC123111981	XP_044388803.1	uncharacterized protein LOC123111981														19	lightyellow	195		-0.00722871	-0.000791255	0.0012404						1.51	3.82667	1.86	5.31333	1.45667	3.25667	0.836667	6.5	0.957358	1.45031	1.18923	2.28067	0.264825	-0.575563	-0.228132
TraesCS1B03G0302500	TraesCS1B02G111600	TraesCS1B01G111600	TRIAE_CS42_U_TGACv1_642021_AA2109690	Traes_1BS_2B06BFFD4		123111998	LOC123111998	XP_044388831.1	uncharacterized protein LOC123111998			BRADI_2g36067v3	hypothetical protein										19	lightyellow	690		-0.00881467	-0.00393463	0.00242104						2.86667	7.09333	2.85333	7.37667	1.43333	4.22333	1.15333	11.21	1.08899	1.02835	1.33415	2.78288	-0.129726	-1.16789	-0.0690918
TraesCS1B03G0306800	TraesCS1B02G113700	TraesCS1B01G113700	TRIAE_CS42_1BS_TGACv1_052728_AA0181960	Traes_1BS_6FEB6D656	Ta.30944.1.S1_s_at	123088224	LOC123088224	XP_044366356.1	glutathione S-transferase 4-like														13	salmon			0.0108839	-0.000521326	-0.00592874						4.39333	0.82	9.86333	0.84	3.13	1.97333	9.72667	0.423333	-2.90217	-3.74876	-0.771412	-4.84268	0.191409	2.50039	1.038
TraesCS1B03G0317200	TraesCS1B02G115900	TraesCS1B01G115900	TRIAE_CS42_1BS_TGACv1_052525_AA0181760	Traes_1BS_BA046E212	Ta.12472.1.S1_x_at	123112512	LOC123112512	XP_044389460.1	peroxidase A2-like														7	black			0.0125612	-0.014023	0.00016526						473.3	154.233	165.547	58.8767	336.597	25.75	194.15	25.6267	-1.75021	-1.75875	-3.42718	-3.53193	-1.59576	0.851961	-1.58722
TraesCS1B03G0320500	TraesCS1B02G117500	TraesCS1B01G117500				123112615	LOC123112615	XP_044389588.1	1-aminocyclopropane-1-carboxylate oxidase-like														23	darkturquoise			-0.00652168	-0.00661619	0.00201313						103.337	84.6467	92.6267	60.1	40.3733	91.2833	8.17333	117.34	-0.295408	-0.607779	1.14544	3.20143	-0.634025	0.508096	-0.321655
TraesCS1B03G0321100	TraesCS1B02G117800	TraesCS1B01G117800	TRIAE_CS42_1BS_TGACv1_049936_AA0164510	Traes_1BS_CBB0CAE7F		101290656	LOC101290656	XP_044389601.1	protein O-glucosyltransferase 1			BRADI_2g35840v3	hypothetical protein		Os05g0149500		Similar to lipopolysaccharide-modifying protein		AT1G07220		F10K1.7 protein [Source:UniProtKB/TrEMBL;Acc:Q9LML4]		43	ivory			0.00200868	0.000252583	-0.00515413						0.71	1.25333	2.41	1.31333	0.663333	0.98	3.14667	0.64	0.530069	-0.980051	0.0847646	-2.44902	0.16029	0.607938	1.67041
TraesCS1B03G0325000	TraesCS1B02G119400	TraesCS1B01G119400	TRIAE_CS42_1BS_TGACv1_049727_AA0160550	Traes_1BS_BB2203477		123088464	LOC123088464	XP_044366612.1	heavy metal-associated isoprenylated plant protein 35-like			BRADI_2g35700v3	hypothetical protein						AT1G56210	HIPP35	Heavy metal-associated isoprenylated plant protein 35 [Source:UniProtKB/Swiss-Prot;Acc:Q9C7J6]		32	violet	63		0.00686061	-0.00269948	2.9436e-05			A			3.20333	0.486667	1.65667	0.516667	1.85333	0.34	3.26	0.246667	-2.80659	-1.91603	-3.11991	-3.64446	-0.102132	-0.0387056	-0.992685
TraesCS1B03G0325300	TraesCS1B02G119600	TraesCS1B01G119600	TRIAE_CS42_1BS_TGACv1_058323_AA0182910	Traes_1BS_7D07C577C	Ta.8375.1.S1_at	123088471	LOC123088471	XP_044366617.1	putative cyclin-dependent kinase F-2														37	skyblue3			-0.000236444	-0.0140329	0.0125728						40.39	10.75	28.86	2.74667	14.4167	7.22	0.38	22.1133	-2.03944	-3.55161	-1.04247	5.12539	-2.11055	-1.34435	-0.598379
TraesCS1B03G0325500	TraesCS1B02G119700	TraesCS1B01G119700			Ta.8375.1.S1_at	123088483	LOC123088483	XP_044366625.1	putative cyclin-dependent kinase F-2			BRADI_1g27750v3	hypothetical protein		Os10g0153900		Serine/threonine protein kinase domain containing protein						23	darkturquoise			1.38199e-05	-0.0158225	0.0165238						25.8533	6.98	17.87	1.21667	7.58	2.33	0.4	20.2867	-2.04274	-3.70699	-1.72665	5.19544	-2.38581	-2.69494	-0.721556
TraesCS1B03G0325600	TraesCS1B02G119800	TraesCS1B01G119800	TRIAE_CS42_1BS_TGACv1_051737_AA0180870	Traes_1BS_EF7A8E992																			23	darkturquoise			0.000676988	-0.012193	0.0140536						6.31667	1.68333	7.57	0.4	3.19	0.506667	0	7.77333	-1.97442	-4.32929	-2.12137	6.07028	-2.6111	-3.36923	-0.256237
TraesCS1B03G0331400	TraesCS1B02G121600	TraesCS1B01G121600	TRIAE_CS42_1BS_TGACv1_050149_AA0168110	Traes_1BS_E72B7E4BF	Ta.21069.1.S1_x_at	123112916	LOC123112916	XP_044389957.1	probable glucan endo-1,6-beta-glucosidase B														25	orange			0.0183134	-0.0163159	0.0134004						62.4	6.45	12.7167	0.693333	63.4133	0.313333	13.7367	1.22667	-3.45953	-4.40568	-7.93981	-3.97823	-3.22322	-1.73585	-2.27707
TraesCS1B03G0331500	TraesCS1B02G121700	TraesCS1B01G121700	TRIAE_CS42_1BS_TGACv1_049680_AA0159480	Traes_1BS_FB3E0601A	Ta.19786.1.A1_at	123088585	LOC123088585	XP_044366743.1	BTB/POZ and MATH domain-containing protein 2-like														5	green	119		-0.00787509	-0.00684208	0.00183157						3.26	7.15667	1.28667	6.13667	1.60667	1.96667	0.473333	5.80667	1.08694	1.85017	0.14286	3.24994	-0.50997	-1.45094	-1.2732
TraesCS1B03G0334900	TraesCS1B02G122800	TraesCS1B01G122800	TRIAE_CS42_1BS_TGACv1_050729_AA0174830		Ta.7022.1.S1_x_at	123113082	LOC123113082	XP_044390147.1	phenylalanine ammonia-lyase-like														2	blue			-0.00852258	-0.0111943	0.008551						21.5067	13.85	20.3533	7.09	5.14667	10.57	0.18	46.3467	-0.579194	-1.70848	0.922384	8.05704	-1.14394	-1.63729	-0.0146533
TraesCS1B03G0341500	TraesCS1B02G125400	TraesCS1B01G125400	TRIAE_CS42_1BS_TGACv1_050360_AA0171190	Traes_1BS_A344E8CC2	Ta.24763.1.S1_at	123113411	LOC123113411	XP_044390576.1	protein SYM1-like			BRADI_1g15450v3	hypothetical protein		Os03g0583800		Mpv17/PMP22 family protein		AT1G52870		At1g52870/F14G24_14 [Source:UniProtKB/TrEMBL;Acc:Q9C933]		6	red	615		-0.0119943	-0.00736859	0.00927722						26.24	120.843	15.5367	73.97	22.51	25.92	11.2267	127.69	2.08417	2.2299	0.141273	2.95755	-0.761427	-1.79414	-0.907162
TraesCS1B03G0342600	TraesCS1B02G125800	TraesCS1B01G125800	TRIAE_CS42_1BS_TGACv1_049477_AA0154500		TaAffx.108760.1.S1_s_at										Os03g0412400		Conserved hypothetical protein						19	lightyellow	706		-0.0151016	-0.0086678	0.00483287						2.62333	17.2267	1.86333	18.7167	1.39667	2.41667	0.456667	24.0733	2.88312	3.33854	0.862573	5.08848	-0.0971664	-2.86812	-0.552579
TraesCS1B03G0346000	TraesCS1B02G127900	TraesCS1B01G127900	TRIAE_CS42_1BS_TGACv1_050188_AA0168850	Traes_1BS_4DFA1AFBB		123113641	LOC123113641	XP_044390880.1	leucine aminopeptidase 2, chloroplastic-like			BRADI_3g21200v3	hypothetical protein										2	blue	429		-0.00516511	-0.0043972	0.00960064						4.76	7.64667	3.21333	5.78667	2.96	2.65667	3.99333	16.22	0.66272	0.526272	-0.352193	1.71504	-0.790938	-2.08328	-0.654491
TraesCS1B03G0346200	TraesCS1B02G128000	TraesCS1B01G128000	TRIAE_CS42_1BS_TGACv1_049648_AA0158790	Traes_1BS_7C71DA159	TaAffx.105485.1.S1_at	123088817	LOC123088817	XP_044366859.1	WAT1-related protein At5g64700-like			BRADI_2g39677v3	hypothetical protein		Os05g0106200	OsUMAMIT8	Protein of unknown function DUF6, transmembrane domain containing protein		AT5G64700		WAT1-related protein At5g64700 [Source:UniProtKB/Swiss-Prot;Acc:Q9FGG3]		5	green	69		-0.00527471	-0.00422554	-0.000654753						0.34	2.32333	0.656667	1.57	0.0766667	0.376667	0.18	1.54333	2.75772	1.12101	2.41179	3.60321	-0.333487	-1.46213	1.30322
TraesCS1B03G0348200	TraesCS1B02G128800	TraesCS1B01G128800	TRIAE_CS42_1BS_TGACv1_050073_AA0167090	Traes_1BS_B734EDEA7		123113771	LOC123113771	XP_044391020.1	zinc transporter 6-like			BRADI_2g34560v3	Transition metal ion transporter, Ion transpor [Source: Projected from Oryza sativa (Os05g0164800)]		Os05g0164800	ZIP6	Transition metal ion transporter, Ion transpor		AT2G30080	ZIP6	ZIP6 [Source:UniProtKB/TrEMBL;Acc:A0A178VN05]		19	lightyellow	408		-0.0105784	-0.000261901	0.00232596						7.27667	19.1667	5.89	21.4167	4.39	15.0667	4.04333	33.02	1.27098	1.37885	1.46934	2.39514	0.00492878	-0.916976	-0.102948
TraesCS1B03G0358900	TraesCS1B02G132000	TraesCS1B01G132000			Ta.19439.1.S1_at	123089009	LOC123089009	XP_044366869.1	uncharacterized protein LOC123089009			BRADI_2g34507v3	hypothetical protein		Os05g0165500		Conserved hypothetical protein						49	plum2			-0.00325588	0.00738659	0.00285647						0.256667	0.363333	0.426667	1.23333	0.56	2.57333	1.13667	2.65333	0.459893	1.49433	2.91947	0.831348	1.68969	0.385179	0.655252
TraesCS1B03G0359900	TraesCS1B02G132400	TraesCS1B01G132400	TRIAE_CS42_U_TGACv1_642537_AA2119180	Traes_1BS_AA993709F	TaAffx.58513.1.S1_at							BRADI_2g34470v3	hypothetical protein		Os05g0168700	Os	Protein of unknown function DUF250 domain containing protein						7	black	6		0.00542801	-0.00681469	-0.000352075			A			6.48	1.2	3.93	1.74667	2.88333	0.836667	3.17	1.21667	-2.11571	-0.680136	-1.28724	-2.03531	0.775257	0.870035	-0.660315
TraesCS1B03G0360800	TraesCS1B02G132800	TraesCS1B01G132800	TRIAE_CS42_U_TGACv1_641152_AA2086700	Traes_1BS_3CCED7301	TaAffx.9187.1.S1_at	123039942	LOC123039942	XP_044318856.1	RING finger and transmembrane domain-containing protein 2-like			BRADI_2g34430v3	hypothetical protein										16	lightcyan	437		-0.0103111	0.00330043	-0.00304124				1		7.23	18.96	5.58333	23.5467	4.91667	27.5033	4.12	22.4767	1.37917	1.82984	2.65829	1.7669	0.20466	1.10151	-0.24601
TraesCS1B03G0361800	TraesCS1B02G133200	TraesCS1B01G133200	TRIAE_CS42_1BS_TGACv1_049780_AA0161240	Traes_1BS_75F6CD2E4		123089036	LOC123089036	XP_044366870.1	arabinogalactan protein 16-like			BRADI_2g31980v3	hypothetical protein										21	darkred			0.00472327	0.00477147	-0.00301913						1.62333	0.393333	2.78	0.146667	0.773333	2.83333	3.09	0.716667	-2.17832	-2.94996	2.16659	-2.48191	0.252625	2.78475	1.02427
TraesCS1B03G0362100	TraesCS1B02G133300	TraesCS1B01G133300	TRIAE_CS42_1BS_TGACv1_050135_AA0167940	Traes_1BS_0904DDDB6	TaAffx.113645.1.S1_at	123089052	LOC123089052	XP_044366871.1	glycerophosphodiester phosphodiesterase GDPD6-like						Os03g0603600		PLC-like phosphodiesterase, TIM beta/alpha-barrel domain domain containing protein						47	bisque4	9		-0.0153383	-0.00466021	-0.0087522						1.06667	14.04	1.52	17.52	0.236667	4.26667	0.13	7.55	3.14379	3.31283	3.59848	5.77712	0.160519	-0.363174	-0.00851814
TraesCS1B03G0362200	TraesCS1B02G133400	TraesCS1B01G133400	TRIAE_CS42_1BS_TGACv1_050022_AA0166100	Traes_1BS_296641DAB		123114266	LOC123114266	XP_044391620.1	glycerophosphodiester phosphodiesterase GDPD6-like			BRADI_1g14983v3	hypothetical protein										40	mediumpurple3			-0.017577	-0.00315089	-0.00995613						5.01333	62.1567	6.74333	115.51	4.15667	22.3733	2.96333	34.6	3.48384	3.64289	2.29495	3.00331	0.55074	-0.304099	0.391688
TraesCS1B03G0367100	TraesCS1B02G135100	TraesCS1B01G135100	TRIAE_CS42_1BS_TGACv1_049414_AA0152840	Traes_1BS_85C7EF9D4		123114470	LOC123114470	XP_044391896.1	phosphoenolpyruvate/phosphate translocator 3, chloroplastic-like			BRADI_2g34300v3	hypothetical protein										32	violet	2		0.00474629	-0.00404177	0.00585217						9.27333	8.56667	16.1533	7.32667	19.6433	3.65333	14.76	9.49333	-0.250191	-1.34116	-2.77339	-1.33464	-0.317851	-1.10771	0.773115
TraesCS1B03G0367500	TraesCS1B02G135300	TraesCS1B01G135300	TRIAE_CS42_1BS_TGACv1_050178_AA0168680	Traes_1BS_F9B6B9C50	TaAffx.59613.1.S1_at							BRADI_2g34280v3	hypothetical protein		Os05g0171200		Embryo-specific 3 family protein						1	turquoise	205		0.00294956	0.0134283	-0.00361313						0.946667	0.446667	4.16	0.486667	2.67	12.75	2.39667	1.44333	-1.31555	-2.49483	2.88241	-1.36653	0.972479	3.64994	2.15177
TraesCS1B03G0370300	TraesCS1B02G136700	TraesCS1B01G136700	TRIAE_CS42_1BS_TGACv1_051470_AA0180000	Traes_1BS_30DE427D5	Ta.11100.1.S1_at	123114662	LOC123114662	XP_044392050.1	protein EARLY RESPONSIVE TO DEHYDRATION 15-like			BRADI_1g62300v3	hypothetical protein		Os03g0353400		Similar to Poly(A)-binding protein C-terminal interacting protein 6						20	royalblue			0.000273282	-0.0106635	0.00361467						208.36	55.4767	105.607	51.0133	86.7667	52.4833	16.5433	78.7767	-2.1308	-1.28585	-1.09208	1.69249	-0.132654	-0.326519	-0.977603
TraesCS1B03G0370600	TraesCS1B02G136800	TraesCS1B01G136800	TRIAE_CS42_1BS_TGACv1_050900_AA0176540	Traes_1BS_27996A726	Ta.13152.2.S1_at	123114684	LOC123114684	XP_044392061.1	uncharacterized protein LOC123114684														38	plum1			-0.000592475	0.00322614	0.00556975						18.3033	8.98	14.3533	9.99667	30.31	27.3367	4.39	20.0167	-0.916982	-0.973808	-0.161057	1.53276	-0.305578	0.848203	-0.248752
TraesCS1B03G0371000	TraesCS1B02G137200	TraesCS1B01G137200	TRIAE_CS42_1BS_TGACv1_051200_AA0178460	Traes_1BS_DF0A86458	Ta.12226.2.S1_x_at	123089228	LOC123089228	XP_044366889.1	uncharacterized protein LOC123089228														25	orange			0.0124491	0.00307058	0.0109364						10.46	2.07333	3.43667	0.676667	28.6167	3.55667	11.26	1.61667	-2.28068	-2.20164	-2.79252	-3.30188	-1.3772	1.82189	-1.45624
TraesCS1B03G0376600	TraesCS1B02G138700	TraesCS1B01G138700	TRIAE_CS42_1BS_TGACv1_049344_AA0149490	Traes_1BS_B2B5394E5	TaAffx.54664.1.S1_at							BRADI_2g33940v3	hypothetical protein		Os05g0179950		Similar to cDNA, clone: J100088D24, full insert sequence						33	darkolivegreen			0.00399064	0.000627439	0.00651887						0.753333	0.856667	1.1	0.45	2.68667	0.386667	2.83333	0.956667	-0.493832	-1.65599	-2.52931	-1.72976	-0.641072	-0.846198	0.521089
TraesCS1B03G0378100	TraesCS1B02G139000	TraesCS1B01G139000	TRIAE_CS42_1BS_TGACv1_049647_AA0158760	Traes_1BS_84EDDA66B		123114983	LOC123114983	XP_044392250.1	leucine-rich repeat extensin-like protein 4			BRADI_2g33930v3	hypothetical protein		Os05g0180300		Leucine-rich repeat, plant specific containing protein						13	salmon			0.00366303	0.00338979	-0.0156786						8.41333	3.61333	39.2433	24.2667	5.69	17.41	31.9433	6.83667	-1.1179	-0.678031	1.63257	-2.72508	2.70559	1.92852	2.26573
TraesCS1B03G0378900	TraesCS1B02G139200	TraesCS1B01G139200	TRIAE_CS42_1BS_TGACv1_051500_AA0180130	Traes_1BS_E33523322	TaAffx.59512.1.S1_at	123115031	LOC123115031	XP_044392266.1	FCS-Like Zinc finger 10-like			BRADI_2g33900v3	hypothetical protein		Os05g0180500		Hypothetical conserved gene						20	royalblue			0.00374142	-0.00901089	0.00567081						9.81667	9.75	7.95667	1.82667	7.08	2.12667	4.82	3.89333	-0.0940115	-2.35245	-1.71743	-0.887625	-2.59702	-0.453558	-0.338577
TraesCS1B03G0385300	TraesCS1B02G141100	TraesCS1B01G141100	TRIAE_CS42_1BS_TGACv1_049737_AA0160660			123115235	LOC123115235	XP_044392389.1	protein ANTAGONIST OF LIKE HETEROCHROMATIN PROTEIN 1-like						Os05g0184901		Phospholipase A2, active site domain containing protein						37	skyblue3			0.00201017	-0.00239624	0.0140449						35.22	11.0867	34.53	10.2467	46.97	17.32	9.27667	48.1867	-1.63172	-3.8192	-1.10757	4.56452	-2.27808	-0.195194	-0.0905968
TraesCS1B03G0385500	TraesCS1B02G141200	TraesCS1B01G141200	TRIAE_CS42_1BS_TGACv1_049737_AA0160650	Traes_1BS_44CE2D44E		123115246	LOC123115246	XP_044392393.1	uncharacterized protein YwkD-like			BRADI_2g33500v3	hypothetical protein		Os07g0160400	OsGLYI9	Glyoxalase/bleomycin resistance protein/dioxygenase domain containing protein		AT5G57040		At5g57040 [Source:UniProtKB/TrEMBL;Acc:Q9LTR8]		30	steelblue			0.00551185	-0.00755996	0.00790275						368.953	140.09	183.713	108.703	256.223	70.2567	185.533	133.8	-1.48121	-1.04783	-2.2842	-0.830544	-0.575346	-0.729759	-1.00872
TraesCS1B03G0386500	TraesCS1B02G141500	TraesCS1B01G141500	TRIAE_CS42_1BS_TGACv1_049856_AA0163100			123041050	LOC123041050	XP_044319685.1	pseudo histidine-containing phosphotransfer protein 2			BRADI_2g33460v3	hypothetical protein		Os05g0186100	OsPHP2	Similar to Histidine-containing phosphotransfer protein 4						10	purple	297		-0.0124739	-0.00752036	0.00752398						0.523333	8.48	0.3	3.50333	0.0633333	0.506667	0	8.16333	2.7281	6.40511	1.74316	6.86598	-0.641494	-3.5632	-4.31855
TraesCS1B03G0388600	TraesCS1B02G142000	TraesCS1B01G142000	TRIAE_CS42_1BS_TGACv1_050013_AA0165940	Traes_1BS_6A84E22E2	Ta.8871.1.A1_at	123115324	LOC123115324	XP_044392440.1	hexokinase-7-like			BRADI_2g33380v3	hypothetical protein		Os05g0187100	HXK7	Similar to Hexokinase						31	paleturquoise			-0.00104313	-0.00588432	0.00382192						3.47667	2.03	0.906667	1.56	2.06	0.716667	0.34	1.78667	-1.09243	0.224813	-1.47099	2.14022	-0.615448	-0.719023	-1.93269
TraesCS1B03G0391300	TraesCS1B02G143000	TraesCS1B01G143000	TRIAE_CS42_1BS_TGACv1_051366_AA0179370	Traes_1BS_59F91C2FE	TaAffx.121125.1.S1_at	123089435	LOC123089435	XP_044367056.1	PRA1 family protein F3-like			BRADI_2g33060v3	hypothetical protein		Os05g0200280		Similar to prenylated rab acceptor family protein						3	brown	1058		-0.00857809	-0.00388414	0.00362385						1.96	5.1	1.46667	4.60667	1.01333	2.15333	0.423333	7.67333	1.03799	0.849983	0.639771	3.87081	-0.0541557	-1.38809	0.133851
TraesCS1B03G0393300	TraesCS1B02G143600	TraesCS1B01G143600	TRIAE_CS42_1BS_TGACv1_049465_AA0154230	Traes_1BS_F0C217B20	Ta.8953.1.S1_a_at							BRADI_2g33350v3	hypothetical protein		Os05g0188100		Conserved hypothetical protein						15	midnightblue			-0.00485098	0.00564659	0.000536391						8.31	14.9067	9.29	13.7533	5.95333	26.3933	14.2733	24.5133	0.650531	0.31447	2.38088	0.150002	-7.22647e-05	1.08662	0.335988
TraesCS1B03G0395400	TraesCS1B02G144700	TraesCS1B01G144700	TRIAE_CS42_1BS_TGACv1_051068_AA0177610	Traes_1BS_A601D3B12	Ta.6043.3.S1_a_at	123115823	LOC123115823	XP_044392844.1	NDR1/HIN1-like protein 13			BRADI_2g33100v3	hypothetical protein		Os05g0199100		Similar to NDR1/HIN1-Like protein 2						28	skyblue			0.00140755	-0.00392948	-0.00533409						1.94667	1.54333	7.2	1.75667	1.16667	1.53333	1.52667	1.67	-0.191238	-2.64322	0.431325	-0.387189	-0.419645	0.235034	2.03234
TraesCS1B03G0405900	TraesCS1B02G147200	TraesCS1B01G147200	TRIAE_CS42_1BS_TGACv1_049687_AA0159600	Traes_1BS_7E67C6CD9		123089595	LOC123089595	XP_044367167.1	bidirectional sugar transporter SWEET3a-like			BRADI_2g32230v3	hypothetical protein		Os05g0214300	OsSWEET3a	Similar to Bidirectional sugar transporter SWEET3a		AT5G53190	SWEET3	Bidirectional sugar transporter SWEET [Source:UniProtKB/TrEMBL;Acc:A0A178U9N2]		31	paleturquoise			-0.00184097	-0.0034257	-0.00599704						2.98333	1.48	0.933333	1.24	0.186667	1.61667	0.183333	0.67	-1.2914	0.558874	3.08141	0.810571	-0.176944	1.78025	-2.02721
TraesCS1B03G0453200	TraesCS1B02G157000	TraesCS1B01G157000	TRIAE_CS42_1BL_TGACv1_035130_AA0146220	Traes_1BL_C9DE3E14F	TaAffx.40.1.S1_at	123119161	LOC123119161	XP_044394802.1	heavy metal-associated isoprenylated plant protein 3-like			BRADI_3g27550v3	hypothetical protein										41	lightsteelblue1			-0.00733858	-0.00940999	0.0104137						76.7767	69.11	27.5133	43.62	42.86	30.12	5.86333	113.343	-0.2818	0.324369	-0.584183	3.73767	-0.890155	-1.43536	-1.49632
TraesCS1B03G0457500	TraesCS1B02G158600	TraesCS1B01G158600	TRIAE_CS42_1BL_TGACv1_031508_AA0115210	Traes_1BL_2873205E8		123119349	LOC123119349	XP_044395072.1	protein fluG-like isoform X1			BRADI_3g27877v3	hypothetical protein		Os10g0456500		Similar to Glutamine synthetase (Fragment)		AT3G53180		Nodulin/glutamine synthase-like protein [Source:UniProtKB/TrEMBL;Acc:F4J9A0]		5	green	593		-0.00527528	-0.00426904	0.0011787						0.62	1.90667	0.513333	1.88333	0.253333	0.423333	0.14	2	1.23182	1.87007	0.908995	3.29149	-0.237697	-1.52889	-0.87595
TraesCS1B03G0462000	TraesCS1B02G159400	TraesCS1B01G159400	TRIAE_CS42_1BL_TGACv1_031794_AA0120680	Traes_1BL_019A334D8	Ta.21321.1.S1_at	123119461	LOC123119461	XP_044395205.1	silicon efflux transporter LSI2-like			BRADI_3g27800v3	hypothetical protein		Os10g0447900	SIET5	Similar to Citrate transporter family protein		AT1G02260		At1g02260 [Source:UniProtKB/TrEMBL;Acc:O81915]		5	green	194		-0.0156538	0.00115419	-0.0040662						1.70333	30.8767	4.51	25.9267	1	16.13	3.99333	28.22	4.24279	2.18076	3.90351	2.29883	-0.456294	-0.34541	1.60573
TraesCS1B03G0462300	TraesCS1B02G159700	TraesCS1B01G159700				123119513	LOC123119513	XP_044395281.1	rubisco accumulation factor 1, chloroplastic-like			BRADI_3g27730v3	hypothetical protein		Os10g0445600		Conserved hypothetical protein						22	darkgreen			0.00282075	0.00662578	-0.00653528						6.47	7.37333	21.2533	8.22	7.02	22.72	23.7033	8.14	-0.0445601	-1.46585	2.14373	-2.16203	0.415148	2.34225	1.83644
TraesCS1B03G0462600	TraesCS1B02G159900	TraesCS1B01G159900	TRIAE_CS42_1BL_TGACv1_031523_AA0115550	Traes_1BL_3431E1CF5	TaAffx.86506.2.S1_x_at	123119530	LOC123119530	XP_044395305.1	E3 ubiquitin-protein ligase RZFP34-like isoform X1			BRADI_3g27900v3	hypothetical protein		Os10g0456800	DCA1	CHY zinc finger protein, Transcriptional co-activator of DST (Drought and Salt Tolerance: zinc finger transcription factor gene), Drought and salt tolerance, Stomatal aperture contro		AT5G22920	RZPF34	E3 ubiquitin-protein ligase RZFP34 [Source:UniProtKB/Swiss-Prot;Acc:Q9FFB6]		30	steelblue			0.0073171	-0.00951082	0.0188911						31.5667	16.2	7.47667	1.55667	28.44	2.64	11.67	9.50667	-1.01747	-2.22892	-3.41234	-0.914436	-3.42169	-1.28735	-2.21024
TraesCS1B03G0468800	TraesCS1B02G161300	TraesCS1B01G161300	TRIAE_CS42_1BL_TGACv1_030336_AA0087250		Ta.25698.1.A1_at	123119649	LOC123119649	XP_044395453.1	3-ketoacyl-CoA thiolase 2, peroxisomal-like			BRADI_3g27960v3	hypothetical protein		Os10g0457600		Similar to Acetyl-CoA C-acyltransferase (3-ketoacyl-coa thiolase b) (EC 2.3.1.16) (Fragment)						5	green	224		-0.0128262	-0.00889079	-0.00363453						6.99333	31.1633	7.50667	29.17	2.37333	7.59333	1.81	23.8967	1.9303	1.64708	1.58486	2.98306	-0.248199	-1.21781	0.0350155
TraesCS1B03G0472200	TraesCS1B02G162000	TraesCS1B01G162000	TRIAE_CS42_1BL_TGACv1_031705_AA0119300	Traes_1BL_CDB5E50C2		123119714	LOC123119714	XP_044395551.1	uncharacterized protein LOC123119714			BRADI_3g28050v3	hypothetical protein		Os07g0170800	OsFbox345	Similar to F-box domain containing protein						45	darkorange2			-0.000729645	-0.00393498	-0.000256992						0.806667	3.27	1.54667	2.42	0.82	0.483333	3.42	1.68333	-0.0445314	-0.737751	-0.369497	-1.04676	-0.886169	-1.96745	-0.19295
TraesCS1B03G0472300	TraesCS1B02G162100	TraesCS1B01G162100	TRIAE_CS42_1BL_TGACv1_032702_AA0133090	Traes_1BL_73E5A673A		123119723	LOC123119723	XP_044395561.1	uncharacterized protein LOC123119723			BRADI_3g28060v3	Plastid transcriptionally active 3 [Source:Projected from Arabidopsis thaliana (AT3G04260) UniProtKB/TrEMBL;Acc:F4J3M2]		Os10g0462800	WSL3	Component of the plastid-encoded plastid RNA polymerase (PEP), peripheral subunit of PEP complex, OsPAP1/OspTAC3, Early chloroplast developmen		AT3G04260	PTAC3	Plastid transcriptionally active 3 [Source:UniProtKB/TrEMBL;Acc:F4J3M2]		28	skyblue			0.0036959	-0.000240138	-0.00766238						0.816667	0.123333	4.63667	0.426667	0.3	1.11	1.25333	0.296667	-2.68256	-3.83718	2.28308	-2.97902	1.33796	2.84562	2.49258
TraesCS1B03G0473000	TraesCS1B02G162300	TraesCS1B01G162300	TRIAE_CS42_1BL_TGACv1_031955_AA0123440	Traes_1BL_38CAFCA56	Ta.7715.1.S1_at	123119731	LOC123119731	XP_044395571.1	chaperonin CPN60-1, mitochondrial			BRADI_3g28070v3	hypothetical protein		Os10g0462900		Similar to mitochondrial chaperonin-60		AT3G23990	CPN60	Chaperonin CPN60, mitochondrial [Source:UniProtKB/Swiss-Prot;Acc:P29197]		29	saddlebrown			-0.00511511	-0.000761717	-0.0126151						1.96333	4.02	6.34	11.0767	1.00333	5.07	2.15333	3.72667	1.0494	0.498556	2.37164	0.317284	1.09224	1.02716	1.64308
TraesCS1B03G0482200	TraesCS1B02G164200	TraesCS1B01G164200	TRIAE_CS42_1BL_TGACv1_032305_AA0128230	Traes_1BL_6D953AB6D		123120142	LOC123120142	XP_044396091.1	hypersensitive-induced response protein 1-like						Os10g0464000		Similar to Hypersensitive-induced response protein						17	grey60			-0.00973626	-0.00835816	-0.000239564						0.326667	9.6	0.446667	2.60333	0	0.45	0.05	2.55	4.10056	3.78209	3.58441	5.72927	-2.0283	-1.34845	-1.70983
TraesCS1B03G0485000	TraesCS1B02G165500	TraesCS1B01G165500	TRIAE_CS42_1BL_TGACv1_032171_AA0126270	Traes_1BL_02BC24D8A	Ta.12952.3.S1_s_at	123120271	LOC123120271	XP_044396178.1	ketohexokinase-like			BRADI_3g28237v3	hypothetical protein										8	pink	200		0.00975163	-0.00472445	0.00247204						4.37	1.81333	6.60667	0.403333	5.5	0.76	5.96333	0.733333	-0.805834	-2.86011	-2.30486	-2.44688	-1.63635	0.0584929	0.417932
TraesCS1B03G0489100	TraesCS1B02G166600	TraesCS1B01G166600	TRIAE_CS42_1BL_TGACv1_032737_AA0133530			123120554	LOC123120554	XP_044396502.1	uncharacterized protein LOC123120554														17	grey60			-0.00582924	-0.000837917	-0.00185236						0	4.12333	0.1	0.493333	0	1.30667	0	0.873333	5.1894	1.98727	6.80649	2.39747	-2.20343	1.42274	0.998697
TraesCS1B03G0493300	TraesCS1B02G167200	TraesCS1B01G167200	TRIAE_CS42_1BL_TGACv1_030372_AA0088320	Traes_1BL_01498409F	Ta.5571.1.S1_at	123120720	LOC123120720	XP_044396648.1	cellulose synthase A catalytic subunit 7	CesA4		BRADI_3g28350v3	Secondary wall-specific cellulose synthase, Secondary cell wall formatio [Source: Projected from Oryza sativa (Os10g0467800)]		Os10g0467800	CESA7	Secondary wall-specific cellulose synthase, Secondary cell wall formatio		AT5G44030	CESA4	cellulose synthase A4 [Source:TAIR;Acc:AT5G44030]		6	red			-0.0013688	-0.0019277	0.00153678						0.623333	3.04333	2.3	2.25667	1.06333	0.79	3.49	2.75333	2.03193	0.0209896	-0.298064	-0.829762	-0.204165	-1.13777	1.80678
TraesCS1B03G0494000	TraesCS1B02G167700	TraesCS1B01G167700	TRIAE_CS42_1BL_TGACv1_031510_AA0115270		TaAffx.114009.1.S1_at	123120750	LOC123120750	XP_044396685.1	probable leucine-rich repeat receptor-like protein kinase At1g35710			BRADI_3g28380v3	hypothetical protein		Os10g0468500		Serine/threonine protein kinase-related domain containing protein						35	sienna3	5		-0.00805006	-0.00417487	-0.00619426						1.05	3.94	1.25333	4.98333	0.406667	2.54	0.0566667	2.41	1.77857	1.83599	2.87497	3.82488	0.275812	0.583462	0.218386
TraesCS1B03G0495300	TraesCS1B02G168400	TraesCS1B01G168400	TRIAE_CS42_1BL_TGACv1_030536_AA0093450	Traes_1BL_E404426D2		123120828	LOC123120828	XP_044396753.1	very-long-chain aldehyde decarbonylase GL1-5-like			BRADI_3g28450v3	hypothetical protein						AT1G02205	CER1	Fatty acid hydroxylase superfamily [Source:TAIR;Acc:AT1G02205]		1	turquoise	765		-0.00635873	0.00971169	-0.00694721						0.153333	0.893333	0	1.79333	0.19	7.38667	0.163333	0.986667	2.63663	6.26578	4.1427	2.23006	-0.163255	3.25854	-3.79246
TraesCS1B03G0495700	TraesCS1B02G168500	TraesCS1B01G168500	TRIAE_CS42_1BL_TGACv1_031639_AA0117690	Traes_1BL_A2A76A427	Ta.8290.1.S1_a_at	123120849	LOC123120849	XP_044396774.1	very-long-chain aldehyde decarbonylase GL1-5			BRADI_3g28460v3	hypothetical protein		Os10g0471100	WDA1	Protein with high similarity to proteins involved in wax production, Cuticular wax biosynthesi		AT1G02205	CER1	Fatty acid hydroxylase superfamily [Source:TAIR;Acc:AT1G02205]		1	turquoise	581		-0.0041745	0.0143723	-0.00175611						0	0.16	0	0	0.01	8.46667	0.13	1.06667	4.89394	1.18635	8.03878	2.92281	-3.74334	3.51349	-0.0357985
TraesCS1B03G0501600	TraesCS1B02G170100	TraesCS1B01G170100	TRIAE_CS42_1BL_TGACv1_031299_AA0111060	Traes_1BL_A4F8B229A	Ta.26907.1.S1_at	123090606	LOC123090606	XP_044367864.1	ribonuclease 1-like						Os09g0538000	OsRNS5	Ribonuclease T2 family protein						27	white			0.0359607	-0.0144283	0.00521736						95.4133	0.44	421.967	0.46	120.647	0.17	180.583	1.00333	-7.43691	-10.2651	-9.03888	-7.70665	-0.749288	-1.8581	2.07888
TraesCS1B03G0512300	TraesCS1B02G173200	TraesCS1B01G173200	TRIAE_CS42_1BL_TGACv1_030247_AA0083770	Traes_1BL_0721C39AE		123121452	LOC123121452	XP_044397380.1	probable cytokinin riboside 5'-monophosphate phosphoribohydrolase LOGL10			BRADI_3g28900v3	Similar to carboxy-lyase [Source: Projected from Oryza sativa (Os10g0479500)]		Os10g0479500	LOGL10	Similar to carboxy-lyase		AT2G37210		Cytokinin riboside 5'-monophosphate phosphoribohydrolase [Source:UniProtKB/TrEMBL;Acc:F4IQ18]		25	orange	5		0.00781492	-0.00336459	0.00723945						7.28667	1.79667	6.71333	2.43667	13.9667	1.62333	6.23	3.22	-2.02705	-2.2034	-3.1476	-1.44982	-0.290984	-0.678566	-0.114635
TraesCS1B03G0512500	TraesCS1B02G173400	TraesCS1B01G173400	TRIAE_CS42_1BL_TGACv1_032022_AA0124330	Traes_1BL_FD97D9FAF	Ta.4366.1.A1_at	123121467	LOC123121467	XP_044397398.1	UDP-xylose transporter 1-like			BRADI_3g28920v3	hypothetical protein		Os10g0479700		Protein of unknown function DUF250 domain containing protein						9	magenta	40		-0.00936348	0.00412822	0.00448003						2.23	4.9	0.57	5.41333	2.13	7.82	0.736667	9	0.947276	2.86027	1.82048	3.34018	0.0324687	0.420121	-1.88052
TraesCS1B03G0513500	TraesCS1B02G173600	TraesCS1B01G173600	TRIAE_CS42_1BL_TGACv1_031688_AA0118850	Traes_1BL_48C89D0DB	Ta.9953.1.S1_at	123121543	LOC123121543	XP_044397483.1	protein ENHANCED DISEASE RESISTANCE 2-like			BRADI_3g28937v3	hypothetical protein						AT2G28320		Pleckstrin homology (PH) and lipid-binding START domains-containing protein [Source:UniProtKB/TrEMBL;Acc:F4IHT0]		47	bisque4	27		-0.0108084	-0.00422107	-0.00041132						2.92333	16.5733	2.19333	16.41	2.88333	5.02	1.53667	11.39	2.28537	2.57251	0.589162	2.225	-0.222227	-0.863889	-0.509365
TraesCS1B03G0515500	TraesCS1B02G174000	TraesCS1B01G174000	TRIAE_CS42_1BL_TGACv1_030309_AA0086310	Traes_1BL_BBB0D9844		123121569	LOC123121569	XP_044397528.1	double-stranded RNA-binding protein 6-like			BRADI_3g28977v3	Double-stranded RNA-binding protein 2 [Source:Projected from Arabidopsis thaliana (AT2G28380) UniProtKB/Swiss-Prot;Acc:Q9SKN2]		Os10g0480500	OsDRB2	Double-stranded RNA-binding-like domain containing protein		AT2G28380	DRB2	Double-stranded RNA-binding protein 2 [Source:UniProtKB/Swiss-Prot;Acc:Q9SKN2]		11	greenyellow			-0.00198767	0.000342798	-0.00439932						1.74333	2.04667	2.76	2.18667	0.99	3.07	1.16333	2.04667	-0.180985	-0.456939	2.02796	0.0668528	-0.0896535	1.33013	0.186301
TraesCS1B03G0516100	TraesCS1B02G174100	TraesCS1B01G174100	TRIAE_CS42_1BL_TGACv1_031541_AA0115840			123090739	LOC123090739	XP_044368012.1	uncharacterized protein LOC123090739			BRADI_3g28990v3	hypothetical protein		Os10g0481000	OsS40-8	Hypothetical conserved gene						24	darkgrey			0.00490669	-0.00765282	0.00234869						6.34667	1.28667	11.38	0.413333	1.57333	1.33333	1.81	2.85333	-2.04054	-4.6212	-0.276604	0.337128	-1.79582	-0.448588	0.784841
TraesCS1B03G0517700	TraesCS1B02G174600	TraesCS1B01G174600	TRIAE_CS42_1BL_TGACv1_031525_AA0115610	Traes_1BL_00B889423		123121677	LOC123121677	XP_044397630.1	uncharacterized protein LOC123121677			BRADI_1g54440v3	hypothetical protein		Os07g0204100		Conserved hypothetical protein						6	red			-0.00561474	-0.00953986	0.0120641						78.58	115.18	20.3733	59.58	50.2367	28.0167	26.43	112.277	0.431498	1.49432	-0.946155	1.63611	-0.993453	-1.4892	-2.05628
TraesCS1B03G0521100	TraesCS1B02G175600	TraesCS1B01G175600	TRIAE_CS42_1BL_TGACv1_030630_AA0096340			123121758	LOC123121758	XP_044397738.1	uncharacterized protein LOC123121758			BRADI_3g29080v3	hypothetical protein		Os10g0482900	OsGRL19	Thioredoxin fold domain containing protein		AT3G11920		F26K24.21 protein [Source:UniProtKB/TrEMBL;Acc:Q9SF07]		2	blue	4		-0.00230584	-0.00220836	0.00660223						1.23333	1.21333	0.516667	1.48333	1.42667	0.483333	0.573333	2.54667	0.0172492	1.1749	-1.49063	1.55012	0.138809	-2.09731	-1.01884
TraesCS1B03G0521400	TraesCS1B02G175900	TraesCS1B01G175900			TaAffx.22844.1.S1_at																		25	orange	5		0.00794269	-0.00608951	0.00519323						6.64667	1.16333	2.57333	0.816667	6.08	0.476667	2.53333	0.68	-2.21168	-2.12347	-3.08372	-2.71924	-1.40445	0.397175	-1.49266
TraesCS1B03G0529400	TraesCS1B02G178000	TraesCS1B01G178000	TRIAE_CS42_1BL_TGACv1_032916_AA0135360									BRADI_2g14101v3	hypothetical protein		Os05g0597200	Os-AT1	Similar to AT1 protein						4	yellow			-0.00397526	0.0141609	0.0208818						0	0	0	0	1.35667	4.36	1.75333	11.14	0	0	1.55308	2.34939	0	-1.00764	0
TraesCS1B03G0531100	TraesCS1B02G178500	TraesCS1B01G178500	TRIAE_CS42_2DS_TGACv1_177185_AA0568200	Traes_1BL_FD25E32FE	Ta.9196.1.S1_x_at	123046529	LOC123046529	XP_044325865.1	thioredoxin-like protein YLS8						Os10g0486600		Similar to Mitosis protein dim1		AT5G08290	YLS8	Thioredoxin-like protein YLS8 [Source:UniProtKB/Swiss-Prot;Acc:Q9FE62]		8	pink	74		0.00637412	-0.00324392	0.00309643						3.61	0.693333	3.71333	0.476667	2.30667	0.683333	3.15667	1.16	-2.32694	-2.86309	-1.66234	-2.04805	-0.520572	-0.588146	0.015577
TraesCS1B03G0534000	TraesCS1B02G179300	TraesCS1B01G179300	TRIAE_CS42_1BL_TGACv1_030281_AA0085160			123091043	LOC123091043	XP_044368373.1	uncharacterized protein LOC123091043			BRADI_3g29430v3	hypothetical protein										3	brown	18		-0.00429376	-0.00667802	0.00792467						1.6	2.00333	0.41	0.956667	0.213333	0.11	0.293333	3.18333	0.464155	1.40302	-1.51382	3.01085	-0.7633	-4.76161	-1.70217
TraesCS1B03G0535900	TraesCS1B02G180300	TraesCS1B01G180300	TRIAE_CS42_U_TGACv1_646095_AA2146010			123122274	LOC123122274	XP_044398391.1	protein FLX-like 3														20	royalblue			0.00496543	-0.00491216	-0.00461433						6.96	1.53	3.81	2.15667	3.27333	1.66333	2.23	0.666667	-1.90303	-1.50417	-1.70759	-2.37533	-0.184739	0.92765	-0.583598
TraesCS1B03G0540500	TraesCS1B02G182100	TraesCS1B01G182100	TRIAE_CS42_1BL_TGACv1_031930_AA0122980	Traes_1BL_36B22EF51								BRADI_3g29790v3	hypothetical protein		Os10g0492800		Similar to Ser/Thr protein phosphatase family						8	pink	4		0.00543151	-0.001317	-0.00487009						10.8167	5.18333	14.36	6.64	9.27	6.51	12.8333	3.77	-1.37437	-1.40806	-0.678735	-2.36271	0.221957	1.31631	0.255646
TraesCS1B03G0542400	TraesCS1B02G183100	TraesCS1B01G183100	TRIAE_CS42_1BL_TGACv1_032777_AA0134000	Traes_1BL_D1B7297B1	Ta.231.1.S1_at	123122480	LOC123122480	XP_044398618.1	uncharacterized protein LOC123122480			BRADI_3g29710v3	hypothetical protein		Os10g0490900		Similar to Secretory protein		AT2G15220		At2g15220/F15A23.4 [Source:UniProtKB/TrEMBL;Acc:Q9SKL6]		1	turquoise	234		-0.00203043	0.00322068	-0.00228154						1.02333	0.873333	0.35	0.336667	0.213333	2.43	0.18	0.71	-0.0836206	0.290962	3.72072	0.943407	-0.160189	2.09315	-0.534772
TraesCS1B03G0543400	TraesCS1B02G183500	TraesCS1B01G183500	TRIAE_CS42_1BL_TGACv1_033678_AA0141260		TaAffx.105935.1.S1_at	123122567	LOC123122567	XP_044398714.1	NDR1/HIN1-like protein 6			BRADI_3g29620v3	hypothetical protein										24	darkgrey			-0.000585752	-0.00163442	0.000159758						3.30667	1.89333	8.67667	1.77	2.46	4.13667	0.853333	4.69	-1.04229	-2.36416	0.733664	1.95543	0.142683	0.318753	1.46455
TraesCS1B03G0545700	TraesCS1B02G184500	TraesCS1B01G184500	TRIAE_CS42_1BL_TGACv1_031654_AA0118000	Traes_1BL_F4D20AE54		123122618	LOC123122618	XP_044398816.1	serine carboxypeptidase-like 51 isoform X2			BRADI_1g60600v3	hypothetical protein		Os03g0393700	OsSCP18	Similar to Serine carboxypeptidase family protein, expressed		AT2G27920	SCPL51	Serine carboxypeptidase-like 51 [Source:UniProtKB/Swiss-Prot;Acc:Q67Y83]		5	green	64		-0.0112033	-0.00106926	0.000181808						15.07	55.2533	8.83333	39.76	9.98667	31.77	6.59	43.6367	1.79885	1.89162	1.54835	2.2317	-0.654552	-0.0395724	-0.747323
TraesCS1B03G0546000	TraesCS1B02G184600	TraesCS1B01G184600	TRIAE_CS42_1BL_TGACv1_030781_AA0100680																				34	darkmagenta	14		-0.0117902	0.0014932	0.00355606						0	1.01	0.296667	6.13333	0	1.51333	0	8.50667	6.27254	6.94082	6.53066	8.1795	1.59431	-1.77986	0.925993
TraesCS1B03G0549700	TraesCS1B02G186700	TraesCS1B01G186700	TRIAE_CS42_1BL_TGACv1_032339_AA0128640	Traes_1BL_D471900B8	Ta.12794.1.A1_at	123122786	LOC123122786	XP_044399062.1	AB hydrolase superfamily protein YfhM-like			BRADI_3g29970v3	hypothetical protein		Os10g0498200		Epoxide hydrolase family protein						31	paleturquoise			0.0024468	-0.00425715	0.00930201						11.9533	7.48667	6.21	4.12333	11.4233	3.76333	7.04	8.86333	-0.757375	-0.618669	-2.07564	-0.260759	-0.848647	-0.957457	-0.987353
TraesCS1B03G0551700	TraesCS1B02G187500	TraesCS1B01G187500	TRIAE_CS42_1BL_TGACv1_035340_AA0146430	Traes_1BL_C64AE1A5E		123122963	LOC123122963	XP_044399286.1	protein NEOXANTHIN-DEFICIENT 1-like			BRADI_3g30027v3	hypothetical protein		Os10g0499600		Similar to predicted protein		AT1G28100		unknown protein; Ha. [Source:TAIR;Acc:AT1G28100]		44	floralwhite			-0.0027575	0.00725086	-0.000600949						3.46333	5.24	7.7	5.76333	2.56	15.6433	7.93333	10.7067	0.739923	-0.656623	2.51582	0.185375	-0.179434	1.02697	1.21711
TraesCS1B03G0553200	TraesCS1B02G188300	TraesCS1B01G188300	TRIAE_CS42_1BL_TGACv1_031176_AA0109230			123123028	LOC123123028	XP_044399374.1	calcium uniporter protein 2, mitochondrial-like			BRADI_3g30110v3	hypothetical protein		Os10g0501500		Protein of unknown function DUF607 family protein						16	lightcyan	104		-0.0109396	0.00774208	-0.00263936						0.833333	4.05	1.14667	10.7033	0.683333	10.1567	1.89333	10.2933	2.18209	3.04117	3.90688	1.66551	1.09293	0.50235	0.233852
TraesCS1B03G0554000	TraesCS1B02G188500	TraesCS1B01G188500	TRIAE_CS42_1BL_TGACv1_030345_AA0087540	Traes_1BL_17FB1541B	Ta.8669.1.S1_at	123123040	LOC123123040	XP_044399396.1	uncharacterized protein LOC123123040			BRADI_3g30127v3	hypothetical protein		Os09g0531100		Conserved hypothetical protein		AT2G21385		Expressed protein [Source:UniProtKB/TrEMBL;Acc:Q94AU3]		26	darkorange			0.00437335	0.00144392	-0.00773905						36.0333	28.9567	39.4867	45.8467	54.3033	34.6767	54.5033	14.28	-0.360911	-0.415006	-1.05951	-2.31536	0.209271	1.1067	0.263367
TraesCS1B03G0562000	TraesCS1B02G190600	TraesCS1B01G190600	TRIAE_CS42_1BL_TGACv1_030771_AA0100400		Ta.29307.1.A1_at	123123223	LOC123123223	XP_044399633.1	benzyl alcohol O-benzoyltransferase-like			BRADI_3g30220v3	hypothetical protein						AT5G17540		At5g17540 [Source:UniProtKB/TrEMBL;Acc:Q9LF70]		3	brown	829		-0.01716	-0.00819245	0.00469554						1.55	22.8467	3.36333	23.29	0.856667	3.77333	0.986667	37.91	3.70897	2.56998	1.61502	4.74008	-0.198158	-3.03737	0.940828
TraesCS1B03G0566100	TraesCS1B02G192200	TraesCS1B01G192200	TRIAE_CS42_1BL_TGACv1_033928_AA0142640	Traes_1BL_8925B27BC	TaAffx.122294.1.S1_at	123123374	LOC123123374	XP_044399815.1	NAC domain-containing protein 96-like	NAC78a		BRADI_3g33957v3	hypothetical protein		Os10g0571600	ONAC121	No apical meristem (NAM) protein domain containing protein		AT4G17980	anac071	NAC domain containing protein 71 [Source:TAIR;Acc:AT4G17980]		5	green	62		-0.00838763	-0.00455903	-0.000285076						0.39	5.77333	1.31	4.19333	0.31	1.12333	0.606667	3.92	3.48578	1.80138	2.57927	2.17665	-0.423702	-1.14696	1.2607
TraesCS1B03G0574000	TraesCS1B02G194100	TraesCS1B01G194100	TRIAE_CS42_1BL_TGACv1_031186_AA0109330		TaAffx.108243.1.S1_at	123091339	LOC123091339	XP_044368765.1	probable glutathione S-transferase GSTU6			BRADI_3g31860v3	hypothetical protein										41	lightsteelblue1			-0.00545742	-0.00611026	-0.00166505						13.37	7.34333	7.16667	7.43667	3.67333	8.77333	0.453333	9.37333	-0.892923	-0.220528	1.03784	3.3358	-0.211787	0.297444	-0.884182
TraesCS1B03G0574200	TraesCS1B02G194300	TraesCS1B01G194300	TRIAE_CS42_U_TGACv1_641932_AA2107590	Traes_1BL_B0C337630	Ta.1830.2.S1_x_at	123123837	LOC123123837	XP_044400404.1	probable glutathione S-transferase GSTU6			BRADI_3g31820v3	hypothetical protein		Os10g0529400	OsGSTU9	Similar to Glutathione S-transferase GSTU6						20	royalblue			0.0015378	-0.00646417	-0.010114						6.39	3.58667	4.59333	2.91333	2.07667	2.71333	1.24	0.63	-0.795795	-0.869298	0.305502	-1.19562	-0.602292	2.36844	-0.52879
TraesCS1B03G0574500	TraesCS1B02G194600	TraesCS1B01G194600																					20	royalblue			-0.00199339	-0.00465035	-0.0143179						5.35667	0.876667	1.51667	4.86667	0.283333	2.56	0.256667	0.306667	-0.802708	0.927272	5.67796	0.0574546	0.80337	1.82685	-0.926609
TraesCS1B03G0574600	TraesCS1B02G194700	TraesCS1B01G194700	TRIAE_CS42_1BL_TGACv1_031893_AA0122280	Traes_1BL_A5CC574CF	Ta.14483.1.S1_x_at	123123846	LOC123123846	XP_044400417.1	probable glutathione S-transferase GSTU6			BRADI_3g31727v3	hypothetical protein		Os10g0528100	OsGSTU24	Similar to Glutathione S-transferase GST 42 (EC 2.5.1.18) (Fragment)						5	green	447		-0.0146336	-0.0139392	-0.0011544						8.72333	39.89	10.25	33.6333	0.96	5.09	1.68	38.62	2.0364	1.66078	2.21773	3.94146	-0.383047	-2.35015	-0.00742059
TraesCS1B03G0574900	TraesCS1B02G194900	TraesCS1B01G194900	TRIAE_CS42_1BL_TGACv1_030930_AA0103950	Traes_1BL_ACE9E7BF8	Ta.3118.1.S1_at	123091355	LOC123091355	XP_044368786.1	glutathione S-transferase U17-like			BRADI_3g31704v3	hypothetical protein		Os10g0525800	OsGSTU31	Similar to Glutathione S-transferase GSTU31 (Fragment)		AT1G10370	GSTU17	Glutathione S-transferase U17 [Source:UniProtKB/Swiss-Prot;Acc:Q9FUS8]		42	lightcyan1			-0.00132581	-0.00349566	-0.00685492						4.09667	2.48333	2.77	2.66333	0.763333	2.83	1.04667	1.50667	-0.896189	-0.192374	2.50085	0.314422	0.131126	1.53359	-0.572689
TraesCS1B03G0577000	TraesCS1B02G196200	TraesCS1B01G196200	TRIAE_CS42_1BL_TGACv1_030552_AA0093850		Ta.13857.1.S1_at	123123958	LOC123123958	XP_044400558.1	vacuolar protein 8-like isoform X1			BRADI_3g31550v3	hypothetical protein		Os10g0522601		Armadillo-like helical domain containing protein		AT2G45720		ARM repeat superfamily protein [Source:UniProtKB/TrEMBL;Acc:O64651]		43	ivory			0.00545918	-0.000837143	0.000821794						2.03333	0.836667	3.54333	0.51	1.64667	1.00333	3.9	1	-1.45071	-2.72275	-0.779043	-2.29542	-0.727972	0.348282	0.544076
TraesCS1B03G0577400	TraesCS1B02G196400	TraesCS1B01G196400	TRIAE_CS42_1BL_TGACv1_032043_AA0124660	Traes_1BL_ACB7057EE	Ta.14513.1.S1_at	123123987	LOC123123987	XP_044400604.1	F-box protein PP2-A13-like			BRADI_3g31520v3	hypothetical protein		Os03g0116700	OsFbox127	Cyclin-like F-box domain containing protein		AT3G61060	AtPP2-A13	Phloem protein 2-A13 [Source:UniProtKB/TrEMBL;Acc:F4JD33]		30	steelblue			0.00305776	-0.000496052	0.00908314						19.1867	5.21	8.54333	3.51667	14.1567	9.92667	5.59667	10.54	-2.04154	-1.49692	-0.656812	0.326766	-0.628983	0.384392	-1.1736
TraesCS1B03G0578100	TraesCS1B02G196600	TraesCS1B01G196600	TRIAE_CS42_1BL_TGACv1_030880_AA0102900	Traes_1BL_F2456E169	Ta.7470.1.S1_at	123124002	LOC123124002	XP_044400631.1	RHOMBOID-like protein 2	rhomboid					Os10g0521900	OsRhmbd17	Similar to Membrane protein						24	darkgrey			0.00259191	-0.00595258	-0.00126413						2.95667	0.893333	4.83667	0.13	0.903333	1.09	0.153333	0.95	-1.51714	-3.82611	0.74669	1.54311	-1.6086	0.422316	0.700367
TraesCS1B03G0578700	TraesCS1B02G197000	TraesCS1B01G197000	TRIAE_CS42_1BL_TGACv1_031605_AA0116990	Traes_1BL_638FCBE65	Ta.29563.1.S1_at	123124035	LOC123124035	XP_044400677.1	uncharacterized protein LOC123124035			BRADI_3g31440v3	hypothetical protein		Os10g0521400		Alpha/beta hydrolase fold-1 domain containing protein						9	magenta	68		-0.00930534	0.000922456	-0.000561297						1.25	3.53	2.19667	4.70667	0.546667	5.93	0.48	7.68333	1.69748	0.940996	2.61255	3.24708	0.201724	0.137138	0.958212
TraesCS1B03G0581900	TraesCS1B02G198100	TraesCS1B01G198100	TRIAE_CS42_1BL_TGACv1_031006_AA0105630			123091406	LOC123091406	XP_044368844.1	uncharacterized protein LOC123091406			BRADI_3g31350v3	hypothetical protein		Os10g0520100	OsFbox559	Cyclin-like F-box domain containing protein						49	plum2			-0.00400955	0.000216009	0.00257611						1.67667	1.79333	2.73	1.26333	0.606667	3.38	0.316667	4.38333	0.289132	-1.24816	2.69401	3.41427	-0.692169	0.0813257	0.845127
TraesCS1B03G0583700	TraesCS1B02G199200	TraesCS1B01G199200	TRIAE_CS42_1BL_TGACv1_030599_AA0095280			123124415	LOC123124415	XP_044400966.1	protein HLB1-like			BRADI_3g31090v3	hypothetical protein										6	red	1047		-0.0105788	-0.00327634	0.0038461						1.67	7.01333	0.916667	5.88333	0.97	3.11	0.47	8.7	1.71935	2.46634	1.75893	3.04868	-0.300507	-0.779852	-1.0475
TraesCS1B03G0583900	TraesCS1B02G199300	TraesCS1B01G199300	TRIAE_CS42_1BL_TGACv1_030599_AA0095290	Traes_1BL_BA8741A3E	Ta.18602.1.S1_at	123124459	LOC123124459	XP_044401020.1	cytochrome b5-like isoform X2			BRADI_3g30890v3	CB5-E [Source:Projected from Arabidopsis thaliana (AT5G53560) UniProtKB/TrEMBL;Acc:A0A178USU5]						AT5G53560	CYTB5-E	CB5-E [Source:UniProtKB/TrEMBL;Acc:A0A178USU5]		5	green	747		-0.009649	-0.00367942	0.00173277						16.6767	39.69	11.88	46.5567	12.12	19.89	6.87667	50.0867	1.23221	1.44306	0.657549	2.27464	-0.129781	-0.942276	-0.34063
TraesCS1B03G0584600	TraesCS1B02G199600	TraesCS1B01G199600	TRIAE_CS42_1BL_TGACv1_030473_AA0091930	Traes_1BL_84977D514	Ta.23112.1.S1_x_at	123124488	LOC123124488	XP_044401034.1	methionine gamma-lyase-like			BRADI_3g30860v3	Methionine gamma-lyase [Source:Projected from Arabidopsis thaliana (AT1G64660) UniProtKB/Swiss-Prot;Acc:Q9SGU9]		Os10g0517500	RRJ1	Cys/Met metabolism, pyridoxal phosphate-dependent enzyme domain containing protein		AT1G64660	MGL	Methionine gamma-lyase [Source:UniProtKB/Swiss-Prot;Acc:Q9SGU9]		17	grey60	2		-0.00650688	-0.00490378	0.00112149						0.87	5.43333	0.866667	2.16	0.27	0.936667	0.606667	2.86333	2.60591	1.17148	2.27647	1.75544	-1.12915	-1.05007	0.305279
TraesCS1B03G0584800	TraesCS1B02G199700	TraesCS1B01G199700	TRIAE_CS42_1BL_TGACv1_030473_AA0091920	Traes_1BL_D0EF7CC0A	Ta.11930.1.S1_at	123124501	LOC123124501	XP_044401042.1	pyridoxal reductase, chloroplastic-like			BRADI_3g30847v3	Pyridoxal reductase, chloroplastic [Source:Projected from Arabidopsis thaliana (AT5G53580) UniProtKB/Swiss-Prot;Acc:Q56Y42]		Os10g0517400		Aldo/keto reductase family protein		AT5G53580	PLR1	Pyridoxal reductase, chloroplastic [Source:UniProtKB/Swiss-Prot;Acc:Q56Y42]		11	greenyellow	247		-0.00252461	0.00573235	-0.00412697						6.31333	12.5767	7.83333	12.3233	8.58	23.0133	9.42333	9.15	0.745521	0.49832	1.90674	-0.643836	-0.102433	2.11348	0.144768
TraesCS1B03G0586900	TraesCS1B02G200600	TraesCS1B01G200600	TRIAE_CS42_1BL_TGACv1_032547_AA0131250			123124622	LOC123124622	XP_044401144.1	21 kDa protein-like			BRADI_3g30770v3	hypothetical protein		Os10g0508700		Pectinesterase inhibitor domain containing protein						33	darkolivegreen			0.00977961	0.00680995	-0.00361065						32.39	4.95333	22.7067	17.17	43.5167	24.33	55.6433	7.85333	-2.84758	-0.830227	-0.620043	-3.2944	1.52683	2.31758	-0.490521
TraesCS1B03G0587700	TraesCS1B02G201100	TraesCS1B01G201100	TRIAE_CS42_1BL_TGACv1_033050_AA0136450	Traes_1BL_A3BAAF327	Ta.26108.1.A1_s_at	123124800	LOC123124800	XP_044401293.1	protein RESPONSE TO LOW SULFUR 2-like			BRADI_3g30730v3	hypothetical protein		Os10g0509600		Conserved hypothetical protein						38	plum1			0.00184752	-0.00201488	0.00023148						23.9333	8.95333	12.7533	23.8467	42.0167	12.05	7.03	10.2733	-1.62902	0.526359	-2.01511	0.0731585	1.27468	0.63001	-0.880703
TraesCS1B03G0588300	TraesCS1B02G201400	TraesCS1B01G201400	TRIAE_CS42_1BL_TGACv1_032376_AA0129110	Traes_1BL_56BBB4B2F	Ta.1098.1.S1_at	123048645	LOC123048645	XP_044327638.1	actin-2	actin		BRADI_3g30710v3	Similar to actin [Source: Projected from Oryza sativa (Os10g0510000)]		Os10g0510000	RAC2	Similar to actin						6	red	196		-0.00773696	-0.012509	0.00180479						9.70667	24.1933	12.5733	18.19	2.66	4.12667	5.21333	25.4767	1.23964	0.302967	0.410894	1.77057	-0.477634	-2.08136	0.459043
TraesCS1B03G0591800	TraesCS1B02G202700	TraesCS1B01G202700	TRIAE_CS42_1BL_TGACv1_030906_AA0103510	Traes_1BL_CC64CA41E	Ta.9143.1.S1_at	123124972	LOC123124972	XP_044401454.1	aquaporin NIP3-1			BRADI_3g30540v3	At4g10380 [Source:Projected from Arabidopsis thaliana (AT4G10380) UniProtKB/TrEMBL;Acc:A3KPG0]		Os10g0513200	NIP3	Boric acid channel, Regulation of boron distributio		AT4G10380	NIP5-1	At4g10380 [Source:UniProtKB/TrEMBL;Acc:A3KPG0]		8	pink	102		0.0150243	-0.00751864	0.00129202			A			9.45333	0.0733333	8.14	0.0366667	4.45667	0.0233333	6.69	0.136667	-7.09464	-7.17531	-7.19527	-5.7581	-0.340388	-1.94469	-0.2597
TraesCS1B03G0593600	TraesCS1B02G203400	TraesCS1B01G203400			TaAffx.622.1.S1_at	123078624	LOC123078624	XP_044357130.1	uncharacterized protein LOC123078624			BRADI_3g30470v3	hypothetical protein		Os10g0516400		Conserved hypothetical protein						9	magenta	118		-0.0100103	0.00311388	-7.42302e-07						0.493333	2.78	0.823333	4.11333	0.0833333	3.67333	0.473333	6.13	2.6083	1.77804	3.97269	2.65686	0.103618	-0.243147	0.933877
TraesCS1B03G0593700	TraesCS1B02G203500	TraesCS1B01G203500	TRIAE_CS42_1BL_TGACv1_030648_AA0096850	Traes_1BL_2F31FBFAF	Ta.6971.2.S1_a_at	123125052	LOC123125052	XP_044401530.1	electron transfer flavoprotein-ubiquinone oxidoreductase, mitochondrial-like isoform X2			BRADI_3g30480v3	Electron transfer flavoprotein-ubiquinone oxidoreductase, mitochondrial [Source:Projected from Arabidopsis thaliana (AT2G43400) UniProtKB/Swiss-Prot;Acc:O22854]		Os10g0516300		Similar to ETFQO (electron-transfer flavoprotein:ubiquinone oxidoreductase); catalytic/ electron carrier/ electron-transferring-flavoprotein dehydrogenase		AT2G43400	ETFQO	Electron transfer flavoprotein-ubiquinone oxidoreductase, mitochondrial [Source:UniProtKB/Swiss-Prot;Acc:O22854]		30	steelblue			0.00613895	-0.0111218	0.00837778						52.1267	14.1833	6.36667	7.38	32.0933	3.18	9.86667	6.28667	-1.87032	-0.0269688	-3.6765	-1.16733	-1.20358	-0.684512	-3.04694
TraesCS1B03G0598700	TraesCS1B02G205500	TraesCS1B01G205500	TRIAE_CS42_1BL_TGACv1_032137_AA0125840		TaAffx.110502.1.S1_x_at	123091524	LOC123091524	XP_044368993.1	uncharacterized protein LOC123091524			BRADI_3g32025v3	hypothetical protein		Os10g0534400		Similar to E4 protein (Fragment)						1	turquoise	465		-0.00244699	0.0101377	-0.00140695						0	0.133333	0.0966667	0.686667	0.216667	3.44333	0.716667	0.94	3.25272	2.60051	3.28665	0.269834	2.4339	2.42246	3.0861
TraesCS1B03G0604100	TraesCS1B02G206800	TraesCS1B01G206800	TRIAE_CS42_1BL_TGACv1_032301_AA0128200	Traes_5BL_8CCF5CF2C	Ta.3979.1.S1_at	123125742	LOC123125742	XP_044402145.1	mitochondrial carnitine/acylcarnitine carrier-like protein			BRADI_3g34077v3	hypothetical protein		Os10g0573700		Similar to Mitochondrial carnitine/acylcarnitine carrier-like protein (A BOUT DE SOUFFLE) (Carnitine/acylcarnitine translocase-like protein) (CAC-like protein)		AT5G46800	BOU	Mitochondrial carnitine/acylcarnitine carrier-like protein [Source:UniProtKB/Swiss-Prot;Acc:Q93XM7]		1	turquoise	225		-0.00611701	0.0114158	-0.00389517						5.14333	33.1867	14.1467	28.29	11.8333	82.0367	24.7367	27.7833	2.46603	0.732319	3.10673	-0.461085	-0.526408	2.3851	1.2073
TraesCS1B03G0604200	TraesCS1B02G206900	TraesCS1B01G206900	TRIAE_CS42_1BL_TGACv1_032301_AA0128210	Traes_1BL_0C02F5395	Ta.5386.1.S1_a_at	123125752	LOC123125752	XP_044402150.1	mitochondrial carnitine/acylcarnitine carrier-like protein			BRADI_3g34090v3	hypothetical protein		Os10g0573800		Mitochondrial carnitine/acylcarnitine carrier-like protein (A BOUT DE SOUFFLE) (Carnitine/acylcarnitine translocase-like protein) (CAC-like protein)						1	turquoise	362		-0.000853551	0.0046118	-0.000494221						0.686667	1.04	1.13667	0.663333	0.866667	3.42	0.863333	1.18	0.594914	-0.087008	2.19963	-0.239165	-0.287167	1.97328	0.394754
TraesCS1B03G0604700	TraesCS1B02G207000	TraesCS1B01G207000	TRIAE_CS42_1BL_TGACv1_031655_AA0118070			123125770	LOC123125770	XP_044402166.1	uncharacterized protein LOC123125770			BRADI_1g60977v3	hypothetical protein		Os03g0385301		Conserved hypothetical protein		AT1G22140		At1g22140/F2E2_13 [Source:UniProtKB/TrEMBL;Acc:Q93Z58]		1	turquoise	267		-0.000985814	0.00700428	-0.00302434						6.21333	5.19333	8.53667	10.37	7.58667	17.1767	8.12667	8.94667	-0.206816	0.650035	1.49125	-0.704927	0.447334	2.27881	-0.409518
TraesCS1B03G0610000	TraesCS1B02G208700	TraesCS1B01G208700				123091577	LOC123091577	XP_044369062.1	probable calcium-binding protein CML11			BRADI_3g34380v3	Probable calcium-binding protein CML17 [Source:Projected from Arabidopsis thaliana (AT1G32250) UniProtKB/Swiss-Prot;Acc:Q9LQN4]		Os01g0505600	OsCML11	EF-Hand type domain containing protein		AT1G32250	CML17	Probable calcium-binding protein CML17 [Source:UniProtKB/Swiss-Prot;Acc:Q9LQN4]		45	darkorange2			0.00390517	0.00198079	0.0016414						2.59667	1.42333	2.08333	1.44333	2.69333	2	4.28	1.4	-0.458103	-0.884911	0.06608	-2.27291	-0.232163	1.45002	0.194646
TraesCS1B03G0610100	TraesCS1B02G208800	TraesCS1B01G208800	TRIAE_CS42_1BL_TGACv1_032012_AA0124160			123091583	LOC123091583	XP_044369076.1	uncharacterized protein LOC123091583			BRADI_3g34375v3	hypothetical protein										33	darkolivegreen			0.00273428	0.00881334	0.00543557						0.243333	0.31	2.28	1.83333	3.01333	2.48333	6.04333	3.31333	0.647013	-1.26752	0.777464	-0.879085	0.356546	0.463661	2.27108
TraesCS1B03G0610700	TraesCS1B02G209200	TraesCS1B01G209200	TRIAE_CS42_1BL_TGACv1_032113_AA0125560		TaAffx.5545.1.S1_at	123091586	LOC123091586	XP_044369088.1	uncharacterized protein LOC123091586			BRADI_3g34320v3	hypothetical protein		Os10g0576600		Tetratricopeptide-like helical domain containing protein						39	orangered4			-0.0052519	0.000697424	-0.00379419						0.0433333	0.456667	0	2.80333	0	0.546667	0.0433333	0.84	4.96262	7.31048	4.53225	4.01788	2.31211	-0.532456	-0.0357909
TraesCS1B03G0615000	TraesCS1B02G210400	TraesCS1B01G210400				123126286	LOC123126286	XP_044402596.1	lysine-specific demethylase JMJ706-like isoform X2			BRADI_3g34240v3	H3K9 demethylase, Floral organ developmen [Source: Projected from Oryza sativa (Os10g0577600)]		Os10g0577600	JMJ706	H3K9 demethylase, Floral organ developmen		AT5G46910		Transcription factor jumonji (Jmj) family protein / zinc finger (C5HC2 type) family protein [Source:UniProtKB/TrEMBL;Acc:F4KIX0]		41	lightsteelblue1			-0.00630551	-0.013593	0.00408582						10.9867	13.3	7.45	5.57	2.49	3.06667	0.753333	12.68	0.0770504	-0.64053	0.27703	3.8156	-1.38501	-1.70057	-0.667425
TraesCS1B03G0619700	TraesCS1B02G212600	TraesCS1B01G212600	TRIAE_CS42_1BL_TGACv1_033403_AA0139200	Traes_1BL_9D109DC20	Ta.12723.1.S1_at	123091634	LOC123091634	XP_044369138.1	uncharacterized protein LOC123091634			BRADI_3g21670v3	hypothetical protein		Os02g0784900		RmlC-like jelly roll fold domain containing protein		AT2G32180	PTAC18	Plastid transcriptionally active 18 [Source:UniProtKB/TrEMBL;Acc:Q9SKY2]		13	salmon			0.0069231	-0.00123371	-0.00670373						3.87	1.12667	8.23	2.87	2.69	1.67	8.38	1.19	-2.27174	-2.67809	-0.0656942	-3.60382	0.945877	1.53612	1.35223
TraesCS1B03G0620900	TraesCS1B02G213100	TraesCS1B01G213100	TRIAE_CS42_1BL_TGACv1_031509_AA0115260	Traes_1BL_0B6A264E1	Ta.25985.1.A1_at	123126778	LOC123126778	XP_044402668.1	urea-proton symporter DUR3-like			BRADI_3g21640v3	hypothetical protein		Os10g0580400	OsDUR3	High-affinity urea transporter, Effective urea acquisition and utilisation, Effective use of low external urea as a N sourc		AT5G45380	DUR3	DUR3 [Source:UniProtKB/TrEMBL;Acc:A0A178UG75]		3	brown	492		-0.00579626	-0.00618078	0.00975168						2.72	5.99333	2.36667	3.54	1.92333	1.41667	1.43333	10.36	1.16578	0.443913	-0.510283	2.08919	-0.708297	-2.46229	0.0135739
TraesCS1B03G0625000	TraesCS1B02G214700	TraesCS1B01G214700	TRIAE_CS42_1BL_TGACv1_031386_AA0112930	Traes_1BL_538A03BEC	Ta.636.2.S1_x_at	123091653	LOC123091653	XP_044369172.1	protein CURVATURE THYLAKOID 1B, chloroplastic-like			BRADI_3g32100v3	hypothetical protein		Os10g0536500		Peptidase S10, serine carboxypeptidase, active site domain containing protein						22	darkgreen			0.00194825	0.0049004	-0.00509285						29.36	86.1833	179.06	81.1667	62.5167	95.92	244.063	75.0933	1.43698	-1.21196	0.624196	-2.25204	-0.187209	0.861986	2.46174
TraesCS1B03G0628600	TraesCS1B02G216400	TraesCS1B01G216400	TRIAE_CS42_1BL_TGACv1_030856_AA0102410	Traes_1BL_E5DE0E229	TaAffx.121307.1.S1_at	123078732	LOC123078732	XP_044357263.1	serine carboxypeptidase-like 34														26	darkorange	43		0.0107007	-0.0054137	-6.75931e-05						10.0433	5.69333	22.61	5.03667	23.1067	3.23	21.8767	2.81	-0.932287	-2.43986	-2.66291	-3.20995	-0.370735	0.791347	1.13684
TraesCS1B03G0632700	TraesCS1B02G217600	TraesCS1B01G217600	TRIAE_CS42_1BL_TGACv1_031909_AA0122690	Traes_1BL_F75DAB5B1		123127305	LOC123127305	XP_044402894.1	protein STRICTOSIDINE SYNTHASE-LIKE 7-like			BRADI_3g32350v3	hypothetical protein		Os10g0543500	OsSTRL19	Six-bladed beta-propeller, TolB-like domain containing protein						3	brown	392		-0.00853205	-0.00787154	0.00842878						9.35	16.5833	4.03	10.6333	2.56	4.61	3.52333	26.1667	0.632839	1.02604	0.81731	2.44497	-0.764714	-2.17033	-1.15791
TraesCS1B03G0636600	TraesCS1B02G219800	TraesCS1B01G219800	TRIAE_CS42_1BL_TGACv1_032669_AA0132640			123091795	LOC123091795	XP_044369341.1	cytochrome c-type biogenesis protein CcmE homolog, mitochondrial-like			BRADI_3g32560v3	Cytochrome c-type biogenesis protein CcmE homolog, mitochondrial [Source:Projected from Arabidopsis thaliana (AT3G51790) UniProtKB/Swiss-Prot;Acc:Q96326]		Os10g0545800		Nucleic acid-binding, OB-fold domain containing protein		AT3G51790	ATG1	Cytochrome c-type biogenesis protein CcmE homolog, mitochondrial [Source:UniProtKB/Swiss-Prot;Acc:Q96326]		18	lightgreen			-0.00308792	0.00175179	-0.00421001						1.26667	1.46	1.52	3.94333	0.723333	2.52	1.38333	2.41667	0.484485	1.10858	2.28612	-0.271785	1.09616	1.09057	0.472069
TraesCS1B03G0637700	TraesCS1B02G220600	TraesCS1B01G220600	TRIAE_CS42_1BL_TGACv1_030413_AA0089990	Traes_1BL_5F8449E10		123091803	LOC123091803	XP_044369349.1	uncharacterized protein LOC123091803						Os02g0829500		Beta-lactamase-like domain containing protein						24	darkgrey			0.00245731	-0.00585763	-0.00300969						1.80333	0.516667	3.57	0.69	0.586667	0.366667	0.456667	0.623333	-2.00046	-2.36354	-0.180123	-0.169959	0.486858	0.378338	0.849937
TraesCS1B03G0641700	TraesCS1B02G221900	TraesCS1B01G221900	TRIAE_CS42_U_TGACv1_641854_AA2105800		TaAffx.89019.1.S1_at	123091826	LOC123091826	XP_044369368.1	U-box domain-containing protein 33-like			BRADI_3g32787v3	hypothetical protein		Os10g0552400	OsPUB67	Zinc finger, RING/FYVE/PHD-type domain containing protein						2	blue	819		-0.00733286	-0.00363558	0.00618508						0.733333	1.85	0.406667	1.78333	0.06	0.6	0	4.82333	1.21652	1.77654	2.47233	7.63482	-0.204277	-2.11101	-0.764295
TraesCS1B03G0644100	TraesCS1B02G223300	TraesCS1B01G223300	TRIAE_CS42_1BL_TGACv1_033285_AA0138440		Ta.3696.3.S1_a_at	123127675	LOC123127675	XP_044403396.1	proline dehydrogenase 2, mitochondrial-like			BRADI_3g32880v3	hypothetical protein		Os10g0550900	OsProDH	Proline oxidase domain containing protein		AT5G38710	POX2	Proline dehydrogenase 2, mitochondrial [Source:UniProtKB/Swiss-Prot;Acc:Q6NKX1]		2	blue	148		-0.00743694	-0.00234404	0.00871936						11.58	20.15	8.62667	12.14	6.52333	13.8833	5.46667	43.77	0.798308	0.30613	1.36384	2.68559	-0.948733	-0.968475	-0.456556
TraesCS1B03G0648900	TraesCS1B02G224700	TraesCS1B01G224700	TRIAE_CS42_1BL_TGACv1_033747_AA0141860			123091883	LOC123091883	XP_044369437.1	uncharacterized protein LOC123091883			BRADI_1g78310v3	hypothetical protein		Os10g0554001		Conserved hypothetical protein						22	darkgreen			0.00185771	0.00379975	-0.00622111						0.0733333	0.376667	2.43	2.10333	0.726667	1.01333	3.46333	0.73	1.43104	-0.336373	0.195882	-2.95858	2.62984	1.11529	4.39727
TraesCS1B03G0649200	TraesCS1B02G224800	TraesCS1B01G224800	TRIAE_CS42_1BL_TGACv1_030423_AA0090330	Traes_1BL_725F481D9	TaAffx.11684.1.S1_at	123127785	LOC123127785	XP_044403568.1	oxysterol-binding protein-related protein 1B-like			BRADI_3g33020v3	hypothetical protein										14	cyan	71		-0.00587252	0.00272399	-0.00564132						1.95667	3.47667	1.93667	6.4	1.38333	6.68333	1.48333	3.67667	0.894451	1.77522	2.27985	0.967416	0.717637	1.40483	-0.163136
TraesCS1B03G0649800	TraesCS1B02G225000	TraesCS1B01G225000	TRIAE_CS42_1BL_TGACv1_030423_AA0090300	Traes_1BL_2E1092B6A	TaAffx.3769.1.A1_at	123127795	LOC123127795	XP_044403576.1	protein NRT1/ PTR FAMILY 6.3-like														8	pink	35		0.00631906	-0.00793089	-0.00212578			A			46.9133	25.38	44.99	22.5867	36.5	11.8	40	12.3	-1.05243	-1.16638	-1.8	-2.10494	-0.18334	0.111808	-0.0693845
TraesCS1B03G0650600	TraesCS1B02G225400	TraesCS1B01G225400	TRIAE_CS42_1BL_TGACv1_031097_AA0107540	Traes_1BL_521014243		123127815	LOC123127815	XP_044403592.1	putative pre-16S rRNA nuclease			BRADI_3g33090v3	hypothetical protein		Os10g0555200		Resolvase, holliday junction-type, YqgF-like domain containing protein		AT1G12244		Polynucleotidyl transferase, ribonuclease H-like superfamily protein [Source:UniProtKB/TrEMBL;Acc:F4IC62]		22	darkgreen			0.00395808	0.00421042	-0.00662237						1.85333	0.82	3.93	1.85333	1.94	3.23	3.93	0.9	-1.88016	-1.74619	0.793184	-2.78428	1.112	2.69817	0.978033
TraesCS1B03G0651300	TraesCS1B02G225700	TraesCS1B01G225700	TRIAE_CS42_1BL_TGACv1_031113_AA0108080	Traes_1BL_E2B0DED6A		123127827	LOC123127827	XP_044403617.1	expansin-B6-like	EXPB7-B		BRADI_3g33106v3	hypothetical protein										43	ivory			0.0236828	-0.00887553	-0.00254234						19.23	5.2	101.103	0.84	22.6433	1.22667	136.777	0.793333	-2.15481	-7.53937	-4.34029	-7.85933	-3.05068	0.945201	2.33388
TraesCS1B03G0651800	TraesCS1B02G226000	TraesCS1B01G226000	TRIAE_CS42_1BL_TGACv1_034214_AA0143800	Traes_1BL_8E3D5E5DF	Ta.3274.1.S1_at	123127833	LOC123127833	XP_044403624.1	expansin-B3-like isoform X1			BRADI_3g33150v3	hypothetical protein		Os10g0555900	OsEXPB3	Similar to Beta-expansin						13	salmon			0.0147872	-0.0034369	-0.00266864						1.38	2.93	43.8867	0.286667	4.55667	0.673333	39.1033	0.87	0.896144	-8.29805	-2.43882	-6.23165	-4.39079	0.803241	4.80341
TraesCS1B03G0654200	TraesCS1B02G226600	TraesCS1B01G226600	TRIAE_CS42_1BL_TGACv1_030605_AA0095500	Traes_1BL_9908E325A	Ta.3566.1.S1_at	123127931	LOC123127931	XP_044403740.1	NADH dehydrogenase			BRADI_3g33920v3	hypothetical protein		Os10g0571100		Protein of unknown function DUF498 domain containing protein		AT3G60150		NADH dehydrogenase ubiquinone 1 alpha subcomplex assembly factor-like protein (DUF498/DUF598) [Source:UniProtKB/TrEMBL;Acc:Q682I4]		14	cyan	14		-0.00374108	0.00256793	-0.00620255						7.21	10.52	8.22333	13.8033	6.4	16.5433	5.67333	9.05	0.460869	0.660894	2.01638	0.225778	0.325131	1.68383	0.125106
TraesCS1B03G0654800	TraesCS1B02G227100	TraesCS1B01G227100	TRIAE_CS42_1BL_TGACv1_030252_AA0083920		Ta.495.2.S1_at	123127990	LOC123127990	XP_044403814.1	haloacid dehalogenase-like hydrolase domain-containing protein Sgpp			BRADI_3g33880v3	hypothetical protein		Os09g0407700		Haloacid dehalogenase-like hydrolase domain containing protein		AT2G38740	SGPP	Haloacid dehalogenase-like hydrolase domain-containing protein Sgpp [Source:UniProtKB/Swiss-Prot;Acc:Q9ZVJ5]		15	midnightblue	187		-0.0100362	0.009119	-0.00504144			B	1		6.07333	16.5167	7.44333	31.1567	7.11667	53.3	5.95333	27.27	1.31016	1.67894	3.22085	1.59428	0.641262	1.65457	0.272476
TraesCS1B03G0659400	TraesCS1B02G228800	TraesCS1B01G228800	TRIAE_CS42_1BL_TGACv1_031357_AA0112310		Ta.26256.1.A1_at	123128146	LOC123128146	XP_044404019.1	BOI-related E3 ubiquitin-protein ligase 1-like						Os10g0565500		Similar to Retrotransposon protein						22	darkgreen			0.0049668	0.00998959	0.000490173						0.67	0.416667	3.81333	0.99	2.3	3.87667	8.32333	1.91	-0.429205	-2.50282	1.23763	-2.61622	0.597162	1.62733	2.67078
TraesCS1B03G0659600	TraesCS1B02G229000	TraesCS1B01G229000	TRIAE_CS42_1BL_TGACv1_030979_AA0104980		Ta.16135.1.A1_at	123128167	LOC123128167	XP_044404037.1	beta-amylase 3, chloroplastic-like			BRADI_3g33730v3	Beta-amylase 3, chloroplastic [Source:Projected from Arabidopsis thaliana (AT4G17090) UniProtKB/Swiss-Prot;Acc:O23553]						AT4G17090	BAM3	Beta-amylase 3, chloroplastic [Source:UniProtKB/Swiss-Prot;Acc:O23553]		16	lightcyan			-0.00484345	0.00441697	-0.00779334						6.54667	9.73333	39.95	35.7767	5.26333	32.1567	18.9233	33.34	0.554616	-0.336333	2.81289	0.335903	1.73015	0.336004	2.6211
TraesCS1B03G0662200	TraesCS1B02G230200	TraesCS1B01G230200	TRIAE_CS42_1BL_TGACv1_032872_AA0134970			123091988	LOC123091988	XP_044369561.1	uncharacterized protein LOC123091988						Os10g0563800		Hypothetical conserved gene						2	blue			-0.00291843	-0.00399122	0.00443113						1.24	1.05	1.53667	1.53333	1.06667	0.56	0.09	2.95	-0.574856	-0.685203	-0.405717	2.99272	-0.17984	-1.16348	-0.0694931
TraesCS1B03G0665600	TraesCS1B02G231500	TraesCS1B01G231500	TRIAE_CS42_1BL_TGACv1_032814_AA0134350			123128386	LOC123128386	XP_044404308.1	ethylene-responsive transcription factor ERF107-like														37	skyblue3			0.00389476	0.00293194	0.0108915						10.84	1.63	12.1233	3.94333	16.81	8.77	5.39333	15.0867	-2.75693	-1.37531	-0.66005	0.783629	1.37103	0.139473	-0.0105922
TraesCS1B03G0666700	TraesCS1B02G232000	TraesCS1B01G232000	TRIAE_CS42_1BL_TGACv1_030791_AA0100870		Ta.23131.1.A1_at	123128417	LOC123128417	XP_044404351.1	serine/threonine-protein kinase D6PKL1-like			BRADI_3g33460v3	hypothetical protein		Os10g0562500		Similar to Protein kinase KIPK						14	cyan	21		-0.00451099	0.00511421	-0.00631371						0.253333	0.383333	0.663333	1.66	0.0333333	2.78667	0.13	1.09333	0.85629	1.33938	5.2474	3.53107	1.72032	1.61041	1.23722
TraesCS1B03G0669600	TraesCS1B02G233600	TraesCS1B01G233600	TRIAE_CS42_1BL_TGACv1_030731_AA0099330	Traes_1BL_688EF6A1A		123128547	LOC123128547	XP_044404516.1	transcription factor GHD7-like isoform X2			BRADI_3g33341v3	hypothetical protein		Os10g0560400	OsCCT35	Similar to CONSTANS-like protein CO9 (Fragment)						16	lightcyan	81		-0.011929	0.00835059	-0.00252804						0.106667	2.40333	0.473333	8.97	0.723333	7.98333	0.39	6.42667	3.2615	4.22381	3.30925	3.56614	2.27607	0.8607	1.31376
TraesCS1B03G0671800	TraesCS1B02G234700	TraesCS1B01G234700	TRIAE_CS42_1BL_TGACv1_031202_AA0109560									BRADI_3g33217v3	hypothetical protein		Os10g0557900		Peptidase M10A and M12B, matrixin and adamalysin family protein		AT4G16640	1MMP	Metalloendoproteinase 1-MMP [Source:UniProtKB/Swiss-Prot;Acc:O23507]		31	paleturquoise			7.22395e-05	-0.00637122	0.0131435						7.22667	7.11	2.42333	2.8	7.65	1.44333	3.46	7.67	-0.141774	-0.125622	-2.00004	0.539834	-1.6166	-1.55992	-1.63276
TraesCS1B03G0672600	TraesCS1B02G234900	TraesCS1B01G234900	TRIAE_CS42_1BL_TGACv1_031958_AA0123500			123128841	LOC123128841	XP_044404888.1	uncharacterized protein LOC123128841 isoform X2			BRADI_3g32047v3	hypothetical protein										2	blue	8		-0.00541642	-0.0012464	0.00585525						0.876667	0.786667	2.41	1.92333	0.62	1.37	0.0966667	6.73	-0.977697	-0.111891	0.989547	4.49625	0.368465	-1.03385	-0.49734
TraesCS1B03G0681400	TraesCS1B02G238600	TraesCS1B01G238600	TRIAE_CS42_1BL_TGACv1_032782_AA0134050	Traes_1BL_A0B439644		123129145	LOC123129145	XP_044405277.1	protein trichome birefringence-like 28			BRADI_2g28400v3	hypothetical protein		Os05g0354400	OsTBL13	Similar to ESK1 (ESKIMO 1)						6	red			-0.00642423	-0.0084049	0.00347569						14.77	19.6333	7.54333	14.59	6.93667	8.07	3.09667	19.3567	0.199878	0.755776	0.124294	2.06316	-0.488877	-0.900292	-1.04478
TraesCS1B03G0687100	TraesCS1B02G241400	TraesCS1B01G241400	TRIAE_CS42_1BL_TGACv1_031560_AA0116120	Traes_1BL_A970C9186	Ta.11488.1.S1_x_at	123129386	LOC123129386	XP_044405509.1	receptor-like protein kinase FERONIA														14	cyan			-0.00314766	-6.94932e-05	-0.00871811						1.69333	1.88667	2.12	3.48667	0.696667	3.77667	0.823333	1.28667	-0.156988	0.33898	2.5351	-0.282773	0.805484	2.32922	0.309516
TraesCS1B03G0687200	TraesCS1B02G241500	TraesCS1B01G241500	TRIAE_CS42_1BL_TGACv1_030539_AA0093510		TaAffx.85100.1.S1_at	123129396	LOC123129396	XP_044405517.1	uncharacterized protein LOC123129396			BRADI_2g28031v3	hypothetical protein		Os01g0308600		Conserved hypothetical protein						24	darkgrey			0.00327512	-0.00580492	-0.00472805						1.11667	0.31	2.8	0.216667	0.12	0	0.566667	0.0666667	-2.07112	-4.1384	0.675867	-5.3492	-0.661743	2.47828	1.40554
TraesCS1B03G0688800	TraesCS1B02G242400	TraesCS1B01G242400	TRIAE_CS42_1BL_TGACv1_033060_AA0136560	Traes_1BL_C8C8B0E77		123129468	LOC123129468	XP_044405559.1	probable protein phosphatase 2C 48			BRADI_2g27970v3	hypothetical protein		Os05g0358500	OsPP2C48	Protein phosphatase 2C domain containing protein						2	blue	374		-0.00523535	-0.00105509	0.0118418						0.866667	3.11333	1.09333	1.95667	1.72	1.13333	1.13	7.67	1.69046	0.684261	-0.476401	2.07653	-0.682771	-2.17783	0.323429
TraesCS1B03G0692600	TraesCS1B02G243800	TraesCS1B01G243800	TRIAE_CS42_1BL_TGACv1_030535_AA0093420	Traes_1BL_EA536B3DD	Ta.17273.1.S1_at	123129557	LOC123129557	XP_044405612.1	UDP-glucuronic acid decarboxylase 2-like			BRADI_2g27870v3	hypothetical protein		Os05g0363200	OsUXS5	UDP-glucuronic acid decarboxylase						11	greenyellow			-0.0056959	0.000173748	-0.00462513						42.1567	29.9867	31.1833	37.5933	14.38	70.33	10.8633	43.7533	-0.69737	0.00683513	2.15524	1.43563	0.186084	1.03059	-0.518121
TraesCS1B03G0692800	TraesCS1B02G244000	TraesCS1B01G244000	TRIAE_CS42_1BL_TGACv1_030620_AA0095990	Traes_1BL_DCD6BA77B	Ta.13757.1.S1_x_at	123129610	LOC123129610	XP_044405644.1	mitochondrial zinc maintenance protein 1, mitochondrial-like			BRADI_2g27840v3	hypothetical protein		Os05g0363600		Similar to Catalytic/ oxidoreductase, acting on NADH or NADPH		AT3G62810		At3g62810 [Source:UniProtKB/TrEMBL;Acc:Q9LZI4]		14	cyan			-0.00288334	0.00260801	-0.00695898						6.45333	5.40333	7.45	11.3233	3.51333	13.7167	5.31333	7.88	-0.2939	0.23516	2.04191	-0.0884146	0.753972	1.57698	0.224913
TraesCS1B03G0693100	TraesCS1B02G244200	TraesCS1B01G244200	TRIAE_CS42_1BL_TGACv1_030321_AA0086640	Traes_1BL_124053782	TaAffx.2456.2.S1_s_at	123129630	LOC123129630	XP_044405662.1	serine/arginine-rich-splicing factor SR34-like isoform X2														7	black	278		0.00621308	-0.00395831	0.00149006			A			3.01	0.66	2.48333	0.813333	2.91667	0.34	2.32333	0.546667	-1.8432	-1.77701	-2.56864	-1.90754	-0.189185	-0.521912	-0.255378
TraesCS1B03G0693600	TraesCS1B02G244600	TraesCS1B01G244600	TRIAE_CS42_1BL_TGACv1_033507_AA0139960																				29	saddlebrown			-0.00269666	-0.00133304	-0.00744333						0.413333	2.69333	1.87667	5.27333	0.626667	1.12667	3.00333	1.35	2.70439	1.1201	1.17382	-2.07947	0.583709	0.312004	2.168
TraesCS1B03G0695700	TraesCS1B02G245700	TraesCS1B01G245700	TRIAE_CS42_1BL_TGACv1_032262_AA0127620			123092354	LOC123092354	XP_044370056.1	NRR repressor homolog 1-like			BRADI_2g27680v3	hypothetical protein										2	blue	348		-0.00883818	-0.00634492	0.0124703						1.08	2.61667	1.83667	2.85667	0.196667	0.503333	0.923333	16.4267	0.251921	-0.319946	1.01878	4.00095	-0.325252	-4.31321	0.246615
TraesCS1B03G0702400	TraesCS1B02G248300	TraesCS1B01G248300	TRIAE_CS42_1BL_TGACv1_030290_AA0085630	Traes_1BL_858B71505		123130282	LOC123130282	XP_044406152.1	diacylglycerol kinase 1-like						Os03g0425300		Similar to DGK1 (DIACYLGLYCEROL KINASE1); calcium ion binding / diacylglycerol kinase		AT5G07920	DGK1	Diacylglycerol kinase 1 [Source:UniProtKB/Swiss-Prot;Acc:Q39017]		16	lightcyan	146		-0.00791764	0.00574379	-0.00595356						0.77	2.99667	0.833333	5.56667	0.833333	6.34667	0.826667	3.25333	1.90478	2.51208	2.71843	1.65982	0.707365	1.43941	0.100064
TraesCS1B03G0703000	TraesCS1B02G248600	TraesCS1B01G248600	TRIAE_CS42_1BL_TGACv1_030290_AA0085570	Traes_1BL_6B21370DA	Ta.5879.2.S1_at	123130325	LOC123130325	XP_044406182.1	eukaryotic peptide chain release factor subunit 1-2-like			BRADI_2g27180v3	hypothetical protein		Os05g0373900		Similar to Eukaryotic peptide chain release factor subunit 1 (eRF1) (Eukaryotic release factor 1) (TB3-1) (Cl1 protein)						19	lightyellow	683		-0.0122957	-0.00252509	0.00168648						0.776667	5.05333	0.703333	5.92667	0.0866667	2.92667	0.206667	8.06667	2.55799	3.26483	5.29983	4.86203	-0.0584964	-0.913125	-0.765334
TraesCS1B03G0704000	TraesCS1B02G248700	TraesCS1B01G248700	TRIAE_CS42_1BL_TGACv1_031866_AA0122010	Traes_1BL_872B95FED		123130341	LOC123130341	XP_044406196.1	cytokinin dehydrogenase 9	CKX10		BRADI_2g27170v3	hypothetical protein		Os05g0374200	OsCKX9	Similar to Cytokinin dehydrogenase 2		AT2G41510	ATCKX1	cytokinin oxidase/dehydrogenase 1 [Source:TAIR;Acc:AT2G41510]		25	orange			0.00519087	-0.00438359	0.00518288						2.32333	0.39	0.933333	0.27	3.34333	0.0233333	0.56	0.313333	-2.82843	-2.6796	-7.83863	-1.99353	-1.13001	-3.89331	-1.27883
TraesCS1B03G0705900	TraesCS1B02G249000	TraesCS1B01G249000	TRIAE_CS42_1BL_TGACv1_032476_AA0130290	Traes_1BL_01F7D02E2	Ta.10.1.S1_a_at	123053516	LOC123053516	XP_044332919.1	lichenase-2-like			BRADI_2g27140v3	hypothetical protein		Os05g0375400	OsPR2	Beta-glucanase precursor						25	orange	15		0.017659	-0.00667317	0.0138184						205.607	23.7733	59.4967	9.09333	272.377	18.5367	170.72	16.03	-3.29912	-2.77969	-4.1095	-3.88628	-1.37222	0.410664	-1.89164
TraesCS1B03G0708800	TraesCS1B02G250600	TraesCS1B01G250600	TRIAE_CS42_1BL_TGACv1_034275_AA0144070	Traes_1BL_1AA872E89	TaAffx.7138.1.S1_x_at	123130727	LOC123130727	XP_044406483.1	probable nitronate monooxygenase			BRADI_3g38730v3	hypothetical protein		Os08g0485400		Similar to Oxidoreductase		AT5G64250		2-nitropropane dioxygenase-like protein [Source:UniProtKB/TrEMBL;Acc:Q9FMG0]		9	magenta	693		-0.0118999	-0.00259305	0.00171372						7.14333	27.4033	7.98333	29.6533	5.13333	18.1167	3.84	38.7133	1.88522	1.73073	1.54603	2.96227	0.0864977	-0.791203	0.240987
TraesCS1B03G0709400	TraesCS1B02G250900	TraesCS1B01G250900	TRIAE_CS42_1BL_TGACv1_031254_AA0110410									BRADI_2g27050v3	hypothetical protein		Os05g0380900	OsCML15	Similar to Polcalcin Jun o 2 (Calcium-binding pollen allergen Jun o 2)						23	darkturquoise			0.0013916	-0.00798023	0.016806						11.69	3.88	11.0733	1.54333	6.53333	2.30667	1.92667	16.67	-1.30499	-1.60715	-2.04665	2.49825	-0.972468	-2.49022	-0.670312
TraesCS1B03G0711100	TraesCS1B02G251600	TraesCS1B01G251600	TRIAE_CS42_1BL_TGACv1_030317_AA0086530	Traes_5BL_02EB972CC	TaAffx.112819.1.S1_at	123181843	LOC123181843	XP_044450175.1	cytochrome P450 94A2-like			BRADI_2g26752v3	hypothetical protein		Os05g0382500		Similar to Cytochrome P450 CYP94E4						2	blue	351		-0.00772268	-0.00116456	0.0136544						2.87	6.83333	1.82	3.77333	2.16667	3.95	1.11667	16.0467	1.04035	1.15091	0.880733	3.65445	-0.70845	-1.46334	-0.819012
TraesCS1B03G0711800	TraesCS1B02G251800	TraesCS1B01G251800	TRIAE_CS42_1BL_TGACv1_032156_AA0126120	Traes_1BL_04EBF6A19	Ta.25635.1.S1_at	123092520	LOC123092520	XP_044370261.1	annexin D4-like			BRADI_2g26760v3	hypothetical protein		Os05g0382600	OsANN3	Similar to Annexin-like protein RJ4						27	white			0.00508161	-0.00997955	0.0125273						4.33	7.25	10.4567	0.23	3.22	0.45	8.00667	5.76	0.433366	-4.9398	-2.38756	-0.752455	-4.44398	-2.88215	0.929186
TraesCS1B03G0711900	TraesCS1B02G251900	TraesCS1B01G251900	TRIAE_CS42_1BL_TGACv1_032156_AA0126110	Traes_1BL_E0E972134		123130805	LOC123130805	XP_044406557.1	annexin D3-like isoform X2			BRADI_2g26770v3	hypothetical protein		Os05g0382900	OsANN4	Annexin family protein						31	paleturquoise			0.00385678	-0.00893835	0.00453863						2.71667	6.02	4.40667	0.336667	1.82333	0.29	3.94667	1.54667	1.05507	-3.88327	-3.42393	-1.39406	-4.20099	-2.90843	0.737351
TraesCS1B03G0712900	TraesCS1B02G252300	TraesCS1B01G252300	TRIAE_CS42_1BL_TGACv1_030344_AA0087470			123092526	LOC123092526	XP_044370265.1	uncharacterized protein LOC123092526			BRADI_2g26795v3	hypothetical protein		Os05g0383200		Conserved hypothetical protein						22	darkgreen			0.00327161	0.00490409	0.0026191						0.406667	0.56	1.81333	0	1.07667	1.81333	2.35	1.24667	0.160746	-2.05299	1.18014	-2.09397	-0.819158	1.15158	1.39458
TraesCS1B03G0717200	TraesCS1B02G254000	TraesCS1B01G254000	TRIAE_CS42_1BL_TGACv1_032727_AA0133400	Traes_1BL_8AC8D124C	Ta.763.2.A1_a_at	123130973	LOC123130973	XP_044406693.1	50S ribosomal protein L1, chloroplastic-like isoform X1			BRADI_2g26940v3	50S ribosomal protein L1, chloroplastic [Source:Projected from Arabidopsis thaliana (AT3G63490) UniProtKB/Swiss-Prot;Acc:Q9LY66]		Os05g0388500		Similar to 50S ribosomal protein L1		AT3G63490	RPL1	50S ribosomal protein L1, chloroplastic [Source:UniProtKB/Swiss-Prot;Acc:Q9LY66]		1	turquoise			0.00323885	0.00106603	-0.00466252						182.107	82.91	99.39	96.0633	164.293	162.427	90.8167	52.18	-1.22647	-0.257024	0.161529	-1.41499	0.0564824	2.35205	-0.912964
TraesCS1B03G0717300	TraesCS1B02G254100	TraesCS1B01G254100	TRIAE_CS42_1BL_TGACv1_033136_AA0137280	Traes_1BL_4A6ADF82F	Ta.20654.1.S1_x_at	123130990	LOC123130990	XP_044406708.1	protein RETICULATA-RELATED 4, chloroplastic-like			BRADI_2g26950v3	hypothetical protein		Os05g0388600		Protein of unknown function DUF3411 domain containing protein		AT5G12470	RER4	Protein RETICULATA-RELATED 4, chloroplastic [Source:UniProtKB/Swiss-Prot;Acc:Q94CJ5]		16	lightcyan	252		-0.00998306	0.00689409	-0.00418543			B			13.2833	52.7567	19.4567	64.5767	14.2067	92.4433	18.95	64.0933	1.90391	1.5468	2.60105	1.21806	0.0668291	1.0948	0.423939
TraesCS1B03G0718600	TraesCS1B02G254500	TraesCS1B01G254500	TRIAE_CS42_1BL_TGACv1_032330_AA0128520	Traes_1BL_EC48F290A	Ta.26828.1.A1_at	123131020	LOC123131020	XP_044406733.1	probable folate-biopterin transporter 7			BRADI_2g26710v3	hypothetical protein		Os05g0389400		Biopterin transport-related protein BT1 family protein		AT1G64890		Probable folate-biopterin transporter 7 [Source:UniProtKB/Swiss-Prot;Acc:Q9XIQ7]		14	cyan	1		-0.00534691	0.00391651	-0.007966						2.09333	3.67	4.08667	10.45	1.84667	8.94667	3.19667	5.36333	0.613957	0.989094	2.30453	0.328674	1.33265	1.14177	0.957514
TraesCS1B03G0723500	TraesCS1B02G256500	TraesCS1B01G256500				123131411	LOC123131411	XP_044407033.1	EEF1A lysine methyltransferase 4-like isoform X1			BRADI_2g26520v3	hypothetical protein		Os05g0392200		Similar to Methylase						7	black	395		0.0196142	-0.0040862	0.00403952			A			28.0033	1.20667	22.6367	1.17667	28.7167	1.95	28.13	1.15333	-3.64235	-3.57229	-3.39363	-4.25124	-0.355761	0.993533	-0.425821
TraesCS1B03G0724600	TraesCS1B02G257000	TraesCS1B01G257000	TRIAE_CS42_U_TGACv1_641051_AA2083400		Ta.24779.1.S1_at	123131502	LOC123131502	XP_044407097.1	desmethyl-deoxy-podophyllotoxin synthase-like			BRADI_2g26490v3	hypothetical protein		Os01g0377000		Cytochrome P450 family protein						3	brown	840		-0.00816217	-0.00163258	0.00303269						0.573333	2.78	0.67	3.02333	0.29	1.27	0.32	4.97	2.17009	2.00393	2.35144	3.00347	-0.192537	-1.62567	-0.0263776
TraesCS1B03G0726800	TraesCS1B02G257700	TraesCS1B01G257700	TRIAE_CS42_1BL_TGACv1_031352_AA0112170	Traes_1BL_67550DBC2	Ta.9650.1.A1_at	123131609	LOC123131609	XP_044407207.1	isoamylase 2, chloroplastic-like			BRADI_2g26170v3	ISA2 [Source:Projected from Arabidopsis thaliana (AT1G03310) UniProtKB/TrEMBL;Acc:A0A178WGA8]		Os05g0393700	OsISA2	Similar to Isoamylase-type starch debranching enzyme ISO2		AT1G03310	ISA2	ISA2 [Source:UniProtKB/TrEMBL;Acc:A0A178WGA8]		18	lightgreen			-0.00646862	-0.00485738	-0.00768712						3.54	4.93667	5.23333	10.07	1.07667	5.55333	1.36	5.49333	0.474795	0.662375	2.53938	1.468	0.710492	0.638552	0.522912
TraesCS1B03G0731100	TraesCS1B02G260000	TraesCS1B01G260000	TRIAE_CS42_1BL_TGACv1_030337_AA0087290	Traes_1BL_49BF78501	Ta.12863.1.S1_at	123131940	LOC123131940	XP_044407608.1	cyclin-P3-1-like			BRADI_2g26090v3	hypothetical protein		Os05g0398000	CycU3	Similar to Cyclin-P3-1						20	royalblue			0.00513183	-0.00399558	-0.00438897						2.72	0.563333	2.44667	0.63	1.37	0.57	1.24	0.106667	-2.35905	-2.51685	-1.42672	-2.9969	-0.235696	1.74556	-0.077894
TraesCS1B03G0732700	TraesCS1B02G260800	TraesCS1B01G260800	TRIAE_CS42_1BL_TGACv1_031331_AA0111750	Traes_1BL_E83F5F559	Ta.517.1.A1_at							BRADI_2g25990v3	hypothetical protein		Os05g0400100		Dienelactone hydrolase domain containing protein						46	brown4	31		-0.00238904	0.0180183	0.00700292						0.743333	2.61333	3.68667	3.12333	5.12667	22.22	10.58	13.43	1.48302	0.00668443	2.07515	-0.228274	0.573836	1.21317	2.05017
TraesCS1B03G0733800	TraesCS1B02G261300	TraesCS1B01G261300	TRIAE_CS42_U_TGACv1_640815_AA2075530	Traes_1BL_3B45BF732	Ta.11633.1.S1_at	123132066	LOC123132066	XP_044407758.1	nodulation protein H-like			BRADI_1g61700v3	hypothetical protein		Os03g0363950		Similar to nodulation protein-related						1	turquoise	636		-0.00169521	0.00674311	-0.00311966						0.0666667	0.126667	0.0533333	0.24	0.1	2.04333	0.0933333	0.236667	1.01193	2.30815	3.57752	2.27954	0.723715	3.80449	-0.572517
TraesCS1B03G0735800	TraesCS1B02G262500	TraesCS1B01G262500	TRIAE_CS42_1BL_TGACv1_031255_AA0110440	Traes_1BL_29957550B	TaAffx.94043.1.S1_at	123132187	LOC123132187	XP_044407893.1	uncharacterized protein LOC123132187			BRADI_4g11910v3	hypothetical protein		Os01g0953100		Protein of unknown function DUF594 family protein						6	red	819		-0.00888519	-0.0048017	0.00690884						0.29	3.50333	0.223333	1.91667	0.0133333	0.343333	0.12	4.62667	3.56107	3.19975	4.07528	5.63065	-0.898299	-3.18263	-0.536991
TraesCS1B03G0737600	TraesCS1B02G263100	TraesCS1B01G263100	TRIAE_CS42_1BL_TGACv1_032287_AA0128020	Traes_1BL_7D5F60286		123132265	LOC123132265	XP_044407988.1	probable aspartic proteinase GIP2			BRADI_2g25850v3	hypothetical protein		Os05g0402900	OsBphi262	Similar to EDGP		AT1G03220		Eukaryotic aspartyl protease family protein [Source:UniProtKB/TrEMBL;Acc:Q9ZVS4]		1	turquoise	3		0.00153747	0.00676614	-0.00118566						0.43	0.0666667	1.01667	0.0266667	0.52	2.51333	0.836667	0.556667	-2.5598	-4.02921	2.63422	-1.45119	-0.0839427	3.2614	1.38548
TraesCS1B03G0738000	TraesCS1B02G263400	TraesCS1B01G263400	TRIAE_CS42_1BL_TGACv1_030568_AA0094290	Traes_1BL_127BBA91B	TaAffx.88685.1.S1_at	123132284	LOC123132284	XP_044408009.1	LEC14B protein-like			BRADI_2g25610v3	hypothetical protein		Os05g0407200	OsWD40-119	WD repeat protein 23 domain containing protein		AT4G03020		Putative WD-repeat protein [Source:UniProtKB/TrEMBL;Acc:Q8LPI5]		50	thistle2			0.00110746	-0.00935884	0.00429514						28.82	22.1467	15.7933	19.8567	25.8967	7.49333	14.0133	16.1067	-0.503175	-0.114453	-2.16717	-0.337665	-0.44965	-1.04103	-0.838372
TraesCS1B03G0744200	TraesCS1B02G266200	TraesCS1B01G266200	TRIAE_CS42_1BL_TGACv1_032079_AA0125110	Traes_1BL_7C87A59DF		123132476	LOC123132476	XP_044408211.1	lipase-like			BRADI_2g25570v3	hypothetical protein		Os05g0408300		Similar to Lipase		AT1G10740		Alpha/beta-Hydrolases superfamily protein [Source:UniProtKB/TrEMBL;Acc:Q9SAC8]		14	cyan	129		-0.0115382	0.00354918	-0.00850961						2.60333	9.32333	5.16	18.33	2.35	19.84	1	11.91	1.83373	1.63303	2.97275	3.3532	0.872549	1.17832	1.07325
TraesCS1B03G0745100	TraesCS1B02G266500	TraesCS1B01G266500	TRIAE_CS42_1BL_TGACv1_030872_AA0102760	Traes_1BL_7A0E99B19	Ta.3366.1.S1_at	123132478	LOC123132478	XP_044408215.1	1-deoxy-D-xylulose-5-phosphate synthase 1, chloroplastic-like			BRADI_2g25550v3	Similar to 1-deoxy-D-xylulose-5-phosphate synthase [Source: Projected from Oryza sativa (Os05g0408900)]		Os05g0408900	CLA1	Similar to 1-deoxy-D-xylulose-5-phosphate synthase		AT4G15560	DXS	DXS1 [Source:UniProtKB/TrEMBL;Acc:A0A178V5I0]		20	royalblue			-0.000951355	0.00309105	0.00270216						2.24	16.1667	15.3233	10.2133	14.4233	11.4933	15.01	12.5633	2.69138	-0.778392	-0.247279	-0.768889	-0.865532	0.432911	2.60424
TraesCS1B03G0747800	TraesCS1B02G267600	TraesCS1B01G267600	TRIAE_CS42_1BL_TGACv1_032588_AA0131720		TaAffx.83489.1.S1_at	123092930	LOC123092930	XP_044370726.1	probable carboxylesterase 15														3	brown	726		-0.00564928	-0.00453572	0.00708429						0.56	2.22667	0.513333	1.18	0.26	0.283333	0.146667	3.26333	1.80873	1.02156	-0.155335	4.20363	-1.10748	-3.31499	-0.320313
TraesCS1B03G0749300	TraesCS1B02G267900	TraesCS1B01G267900	TRIAE_CS42_1BL_TGACv1_032016_AA0124260	Traes_1BL_9A4950983		123132600	LOC123132600	XP_044408371.1	protein NRT1/ PTR FAMILY 3.1-like			BRADI_2g25460v3	hypothetical protein		Os05g0410500		TGF-beta receptor, type I/II extracellular region family protein						1	turquoise	599		-0.0028515	0.0118343	-0.0126925						0.186667	0.243333	0.393333	1.49667	0.12	8.22667	0.586667	0.156667	1.49301	0.781839	5.91382	-2.31045	1.22244	6.00867	1.93361
TraesCS1B03G0749400	TraesCS1B02G268000	TraesCS1B01G268000	TRIAE_CS42_1BL_TGACv1_032016_AA0124230	Traes_5BL_6A64904C5		123092942	LOC123092942	XP_044370734.1	probable carboxylesterase 15			BRADI_2g25470v3	hypothetical protein		Os05g0410200	Hsr203j	Alpha/beta hydrolase fold-3 domain containing protein						6	red			-0.00188724	-0.00579364	0.00609578						0.77	2.31667	2.19667	1.31333	2.26667	0.296667	0.246667	2.56667	1.52879	-0.489538	-3.20375	3.28615	-0.774427	-2.53812	1.2439
TraesCS1B03G0752200	TraesCS1B02G269100	TraesCS1B01G269100	TRIAE_CS42_1BL_TGACv1_031387_AA0112950			123132741	LOC123132741	XP_044408471.1	glutathione transferase GST 23-like			BRADI_2g25376v3	hypothetical protein		Os05g0412800	OsGSTU16	Similar to Glutathione S-transferase GST 41 (EC 2.5.1.18)						11	greenyellow	390		-0.00476125	0.00966333	-0.0111167		1				0	0.21	0.203333	2.13333	0.13	4.69667	0.0433333	0.343333	3.17954	2.78722	4.55388	1.9877	4.01974	3.62692	4.41206
TraesCS1B03G0754200	TraesCS1B02G269800	TraesCS1B01G269800	TRIAE_CS42_1BL_TGACv1_030527_AA0093220	Traes_1BL_27164634E	TaAffx.37354.1.S1_at	123133211	LOC123133211	XP_044408676.1	putative disease resistance protein RGA4			BRADI_2g25327v3	hypothetical protein										37	skyblue3			-0.00400234	-0.014444	8.25639e-05						10.3933	9.53	9.33667	8.01333	4.11	2.62	0.74	7.68333	-0.305319	-0.58987	-0.664633	2.91205	-0.512822	-1.22186	-0.228271
TraesCS1B03G0754600	TraesCS1B02G270000	TraesCS1B01G270000	TRIAE_CS42_1BL_TGACv1_032389_AA0129260	Traes_1BL_0635E27C2	Ta.1381.2.S1_x_at	123133236	LOC123133236	XP_044408693.1	uncharacterized protein LOC123133236			BRADI_2g30370v3	hypothetical protein		Os05g0337400		Similar to heavy-metal-associated domain-containing protein						1	turquoise			0.00224742	0.00951153	-0.00143816						19.5933	20.5133	21.1833	12.83	21.72	76.5833	45.14	18.9233	-0.14644	-1.10035	2.07123	-1.80355	-0.833513	2.73784	0.120398
TraesCS1B03G0755500	TraesCS1B02G270300	TraesCS1B01G270300	TRIAE_CS42_1BL_TGACv1_032321_AA0128340	Traes_1BL_E97E7A33D		123092994	LOC123092994	XP_044370805.1	G-type lectin S-receptor-like serine/threonine-protein kinase At2g19130			BRADI_2g25280v3	hypothetical protein										34	darkmagenta			-0.00794415	0.00227445	0.0046666						0.0133333	0.963333	0.06	1.49667	0	1.42667	0	3.6	4.61409	5.54545	7.35628	8.99053	0.244018	-0.842716	-0.687362
TraesCS1B03G0759600	TraesCS1B02G272200	TraesCS1B01G272200	TRIAE_CS42_1BL_TGACv1_033492_AA0139870	Traes_1BL_533D05ED2	Ta.8893.1.S1_at	100526689	LOC100526689	XP_044408923.1	MLO-like protein 1	TaMlo2		BRADI_2g25190v3	hypothetical protein						AT4G02600	MLO1	MLO-like protein 1 [Source:UniProtKB/Swiss-Prot;Acc:O49621]		39	orangered4	25		-0.00924291	-0.000538951	-0.00653674						1.79333	6.46333	2.30333	11.79	1.27	5.32333	1.02667	5.92667	1.64233	2.24152	1.99497	2.04891	0.762617	0.305085	0.16343
TraesCS1B03G0763900	TraesCS1B02G274300	TraesCS1B01G274300	TRIAE_CS42_1BL_TGACv1_032010_AA0124150			123133801	LOC123133801	XP_044409147.1	NAC domain-containing protein 48-like			BRADI_2g24987v3	hypothetical protein										5	green			-0.00611314	-0.0106783	-0.00589459						7.02333	6.69	6.85667	12.05	1.87333	2.62667	0.59	6.21667	-0.26867	0.692303	0.102308	2.90948	0.780663	-0.841211	-0.180309
TraesCS1B03G0764500	TraesCS1B02G274500	TraesCS1B01G274500	TRIAE_CS42_1BL_TGACv1_030496_AA0092320	Traes_1BL_3ACD5CD13		123093090	LOC123093090	XP_044370934.1	pectinesterase-like			BRADI_2g11850v3	hypothetical protein		Os01g0311800	OsPME2	Similar to Pectin methylesterase 8 (Fragment)		AT4G02330	PME41	Probable pectinesterase/pectinesterase inhibitor 41 [Source:UniProtKB/Swiss-Prot;Acc:Q8RXK7]		4	yellow	344		-0.00550586	0.00221457	0.0152009						0	0.0533333	0	0.0833333	0	0.423333	0	5.55333	3.17801	3.47357	5.9125	9.02782	0.25981	-3.24633	0
TraesCS1B03G0766200	TraesCS1B02G275200	TraesCS1B01G275200	TRIAE_CS42_U_TGACv1_640699_AA2069320	Traes_1BL_F857E565C	TaAffx.25652.1.S1_at	123133920	LOC123133920	XP_044409240.1	amino acid permease 4-like isoform X1			BRADI_2g24910v3	hypothetical protein		Os05g0424000	OsAAP11F	Amino acid permease, Transport of amino acid						31	paleturquoise			0.00328107	-0.0121492	0.00891912						17.6	12.95	12.87	3.60333	8.31333	2.04333	9.22	9.96333	-0.512433	-1.88393	-2.18152	-0.353208	-1.74421	-1.98883	-0.372706
TraesCS1B03G0767200	TraesCS1B02G276000	TraesCS1B01G276000	TRIAE_CS42_1BL_TGACv1_030694_AA0098060	Traes_1BL_572D99E7E	Ta.10768.1.A1_at	123093103	LOC123093103	XP_044370947.1	bidirectional sugar transporter SWEET1b-like			BRADI_2g24850v3	hypothetical protein		Os05g0426000	OsSWEET1b	MtN3 and saliva related transmembrane protein family protein						6	red			-0.00285669	0.00283802	0.00956701						1.18667	3.83333	0.31	2.62667	3.74333	2.20667	2.78667	4.10333	1.83316	2.83946	-0.628578	-0.178392	-0.615746	-0.362271	-1.62205
TraesCS1B03G0767900	TraesCS1B02G276500	TraesCS1B01G276500	TRIAE_CS42_1BL_TGACv1_031247_AA0110350	Traes_1BL_C40D1B0CC		123134042	LOC123134042	XP_044409332.1	uncharacterized protein LOC123134042														1	turquoise	340		0.00140222	0.0125221	-0.0210828						24.5167	7.40667	20.0267	14.97	9.36	147.32	11.77	4.12	-1.85051	-0.517079	3.89284	-2.17171	0.882829	5.74781	-0.450606
TraesCS1B03G0768600	TraesCS1B02G276800	TraesCS1B01G276800	TRIAE_CS42_1BL_TGACv1_031247_AA0110320	Traes_1BL_0A3CDBCFC	Ta.21350.2.S1_at	123134063	LOC123134063	XP_044409350.1	Bowman-Birk type proteinase inhibitor B5-like			BRADI_2g24840v3	hypothetical protein										8	pink			0.00738528	0.00216888	-0.00502254						8.77333	1.85	9.54667	0.81	3.50333	7.91667	5.82667	1.31	-2.6335	-3.53233	0.981268	-2.50902	-1.04725	3.02021	-0.148419
TraesCS1B03G0768700	TraesCS1B02G276900	TraesCS1B01G276900			Ta.5024.1.S1_x_at	543201	LOC543201	XP_044409356.1	uncharacterized protein LOC543201	wali6													21	darkred			0.00653415	0.00519803	-0.00403218						5.12	1.32	1.90667	0.456667	3.02333	5.35333	4.32667	0.216667	-2.54252	-2.46324	0.697127	-4.48795	-1.79168	4.96854	-1.87095
TraesCS1B03G0769100	TraesCS1B02G277000	TraesCS1B01G277000	TRIAE_CS42_1BL_TGACv1_030699_AA0098220	Traes_1BL_E6A53E6FA	Ta.7740.1.A1_at	123134084	LOC123134084	XP_044409366.1	phospholipase A1-II 7-like														17	grey60	39		-0.00913068	-0.0071078	-0.00645673						0.736667	28.4067	0.986667	1.86333	0.233333	2.53667	0.286667	1.27	5.31757	0.323327	3.00067	2.10435	-4.22383	1.55806	0.770417
TraesCS1B03G0771000	TraesCS1B02G277800	TraesCS1B01G277800	TRIAE_CS42_1BL_TGACv1_030700_AA0098300	Traes_1BL_4AEEEBFFA		123134228	LOC123134228	XP_044409448.1	uncharacterized protein LOC123134228			BRADI_2g24710v3	hypothetical protein		Os05g0427100		Octicosapeptide/Phox/Bem1p domain containing protein						49	plum2			-0.00585917	0.00954326	0.00194102						2.28	4.22	3.97667	8.89667	3.32	14.8033	6.18333	16.15	0.545312	0.863537	2.04709	0.822776	0.794523	0.258499	0.476298
TraesCS1B03G0772800	TraesCS1B02G278300	TraesCS1B01G278300	TRIAE_CS42_1BL_TGACv1_030348_AA0087660	Traes_1BL_FC293B3EE		123134284	LOC123134284	XP_044409492.1	dnaJ protein homolog 1-like			BRADI_2g24680v3	hypothetical protein										32	violet	69		0.00900713	-0.0024143	0.0041542			A			4.48333	1.19	2.55667	0.166667	4.04333	0.776667	4.78667	0.513333	-2.18874	-4.47563	-2.33402	-3.20371	-2.95353	0.576546	-0.666644
TraesCS1B03G0775000	TraesCS1B02G279100	TraesCS1B01G279100	TRIAE_CS42_U_TGACv1_640691_AA2068670	Traes_1BL_B9305B451	Ta.1020.2.A1_x_at	123134346	LOC123134346	XP_044409553.1	isoflavone reductase homolog IRL-like						Os01g0106400		Similar to Isoflavone reductase homolog IRL (EC 1.3.1.-)		AT1G75290		NAD(P)-binding Rossmann-fold superfamily protein [Source:TAIR;Acc:AT1G75290]		4	yellow	75		-0.00180414	0.000557631	0.0118683						0.126667	1.33333	0.66	0.443333	0.766667	0.273333	1.8	4.11667	4.92678	0.54651	-2.30736	0.854274	-1.59239	-4.81729	2.78788
TraesCS1B03G0776400	TraesCS1B02G279500	TraesCS1B01G279500	TRIAE_CS42_1BL_TGACv1_030256_AA0084050	Traes_1BL_3EA92CEB0		123134411	LOC123134411	XP_044409610.1	uncharacterized protein LOC123134411			BRADI_2g24390v3	hypothetical protein		Os05g0430200		Similar to ATP binding protein						24	darkgrey			0.00334029	-0.00218346	-0.00180229						2.82667	0.6	3.38333	0.986667	1.34333	1.29333	1.64333	1.08667	-2.20535	-1.59082	-0.217559	-1.06794	0.771259	0.469339	0.156725
TraesCS1B03G0777000	TraesCS1B02G279900	TraesCS1B01G279900	TRIAE_CS42_1BL_TGACv1_030256_AA0084090			123134453	LOC123134453	XP_044409644.1	protein NRT1/ PTR FAMILY 5.10-like														3	brown	192		-0.0065493	-0.00117823	0.00710528						0.0933333	2.53667	0.283333	0.816667	0.16	0.77	0.186667	3.15333	3.93359	1.3274	2.06417	3.0096	-1.5038	-1.55668	1.10239
TraesCS1B03G0777100	TraesCS1B02G280000	TraesCS1B01G280000	TRIAE_CS42_1BL_TGACv1_030256_AA0084120	Traes_1BL_9A01916D0		123134474	LOC123134474	XP_044409666.1	protein NRT1/ PTR FAMILY 5.10-like			BRADI_2g24340v3	hypothetical protein		Os05g0430900		TGF-beta receptor, type I/II extracellular region family protein						6	red			-0.00419145	-0.00564976	-9.05945e-05						1.21	2.45333	1.47	1.87	0.296667	0.693333	0.183333	2.02	1.22698	0.070416	2.27005	2.8827	-0.47985	-0.858283	0.676717
TraesCS1B03G0779800	TraesCS1B02G281100	TraesCS1B01G281100	TRIAE_CS42_1BL_TGACv1_031102_AA0107780	Traes_1BL_AC5FE4599	TaAffx.105516.1.S1_at																		11	greenyellow	279		-0.00311702	0.00294983	-0.00323548						1.21	1.12667	0.526667	1.41	0.483333	3.71333	0.42	1.13333	-0.0412406	0.977304	2.69882	1.02886	0.062536	2.08814	-0.95601
TraesCS1B03G0780000	TraesCS1B02G281200	TraesCS1B01G281200	TRIAE_CS42_1BL_TGACv1_030293_AA0085660	Traes_1BL_FEFB05D27	TaAffx.110250.1.S1_x_at	123079155	LOC123079155	XP_044357775.1	uncharacterized protein LOC123079155, partial			BRADI_2g24240v3	hypothetical protein										17	grey60			-0.0145036	-0.0110262	-0.00472143						6.94667	43.6367	5.52667	21.81	1.34667	7.32333	0.663333	17.5267	2.55629	1.59191	2.83462	4.18091	-1.08782	-0.919169	-0.12345
TraesCS1B03G0781100	TraesCS1B02G281600	TraesCS1B01G281600	TRIAE_CS42_1BL_TGACv1_030725_AA0099240		Ta.1595.1.S1_at	123134657	LOC123134657	XP_044409801.1	uncharacterized protein LOC123134657						Os05g0435300		Protein of unknown function DUF1218 domain containing protein						2	blue	360		-0.0076208	-0.00237915	0.00587195						9.64	16.24	8.83667	14.9133	6.26333	11.92	4.67	34.3867	0.562936	0.468457	0.770803	2.52785	-0.295897	-0.994865	-0.201418
TraesCS1B03G0783500	TraesCS1B02G282600	TraesCS1B01G282600	TRIAE_CS42_1BL_TGACv1_031677_AA0118570			123149489	LOC123149489	XP_044425110.1	uncharacterized protein LOC123149489														2	blue	381		-0.00824379	-0.00322501	0.00730797						0.773333	1.76	0.393333	2.62667	0.226667	0.713333	0.133333	6.17667	2.05174	2.48398	1.60624	6.3168	0.106153	-2.61881	-0.326093
TraesCS1B03G0788000	TraesCS1B02G283200	TraesCS1B01G283200	TRIAE_CS42_1BL_TGACv1_032408_AA0129550	Traes_1BL_C46C2F881		123057691	LOC123057691	XP_044336548.1	sm-like protein LSM3A			BRADI_2g56060v3	hypothetical protein		Os01g0866700		Similar to Sm-like protein		AT1G21190	LSM3A	Sm-like protein LSM3A [Source:UniProtKB/Swiss-Prot;Acc:Q9LMN4]		11	greenyellow			-0.00555833	0.00265839	-0.00942027						6.92	8.84667	10.2567	14.45	2.89667	18.3733	7.81667	11.5367	0.27962	0.315163	2.20303	-0.342064	0.275918	1.89395	0.240375
TraesCS1B03G0788200	TraesCS1B02G283400	TraesCS1B01G283400	TRIAE_CS42_1BL_TGACv1_031993_AA0123970			123093257	LOC123093257	XP_044371104.1	putative receptor-like protein kinase At4g00960			BRADI_1g12377v3	hypothetical protein		Os05g0493100		Similar to KI domain interacting kinase 1						41	lightsteelblue1			-0.00577211	-0.00666775	0.000167765						2.77333	3.59667	1.42333	1.62	0.0766667	1.75333	0.15	3.07	0.199814	-0.0722364	4.29917	4.18809	-1.45508	-0.572722	-1.18303
TraesCS1B03G0793700	TraesCS1B02G285100	TraesCS1B01G285100	TRIAE_CS42_1BL_TGACv1_031175_AA0109220	Traes_1BL_0F9F21D68		123093338	LOC123093338	XP_044371214.1	NAC domain-containing protein 90-like						Os05g0442700	ONAC012	No apical meristem (NAM) protein domain containing protein						2	blue	54		-0.00567802	0.00163028	0.00697145						0	0.313333	0	0.856667	0	0.466667	0	2.99667	4.40661	5.56461	5.12363	7.27271	1.12224	-1.32692	0
TraesCS1B03G0794500	TraesCS1B02G285400	TraesCS1B01G285400	TRIAE_CS42_1BL_TGACv1_031040_AA0106510	Traes_1BL_A6F7A9A54		123093356	LOC123093356	XP_044371245.1	glucan endo-1,3-beta-glucosidase 14-like			BRADI_2g23940v3	hypothetical protein										15	midnightblue	113		-0.00567156	0.00505093	-0.00146089			B			0.0366667	0.673333	0	1.12	0.02	2.20333	0	1.22333	3.40776	6.31355	7.08696	6.64413	1.01756	1.23987	-1.88827
TraesCS1B03G0794800	TraesCS1B02G285700	TraesCS1B01G285700	TRIAE_CS42_1BL_TGACv1_033714_AA0141580	Traes_1BL_2FD102B51	Ta.6590.2.A1_a_at	123134978	LOC123134978	XP_044410053.1	cell division protein FtsZ homolog 2-2, chloroplastic-like			BRADI_2g23900v3	hypothetical protein		Os05g0443800		Similar to Plastid division protein ftsZ1 precursor						27	white			0.00432271	-0.000250821	-0.00318135						1.59	0.353333	3.60333	0.75	1.14667	1.09	2.14667	0.73	-2.56196	-3.20526	0.361162	-2.10383	0.341166	1.44295	0.984462
TraesCS1B03G0795600	TraesCS1B02G285900	TraesCS1B01G285900	TRIAE_CS42_1BL_TGACv1_034417_AA0144470	Traes_1BL_47E8E023F		123135063	LOC123135063	XP_044410124.1	zinc finger protein WIP6-like			BRADI_2g23870v3	hypothetical protein		Os05g0444200		Similar to T6J4.5 protein (WIP6 protein)						19	lightyellow	33		-0.00584066	-0.00519413	0.000655846						2.47333	3.18333	2.3	4.07333	0.94	1.83667	0.536667	5.11333	0.198131	0.655544	0.437373	2.8475	0.337767	-1.30005	-0.119645
TraesCS1B03G0796800	TraesCS1B02G286200	TraesCS1B01G286200	TRIAE_CS42_1BL_TGACv1_033087_AA0136920	Traes_1BL_1656180DB		123093372	LOC123093372	XP_044371267.1	solute carrier family 35 member F2-like														8	pink	45		0.00582172	-0.00512838	0.000292338			A			2.57667	1.41333	3.46333	0.666667	2.66	0.47	2.30667	0.49	-1.1526	-2.08175	-2.44782	-2.99933	-0.756018	0.625599	0.173141
TraesCS1B03G0798800	TraesCS1B02G286900	TraesCS1B01G286900	TRIAE_CS42_1BL_TGACv1_033382_AA0139040	Traes_1BL_263DE6AA9	Ta.7331.1.S1_at	123135149	LOC123135149	XP_044410187.1	protein ROS1C-like isoform X2			BRADI_2g23797v3	hypothetical protein		Os05g0445900	ROS1c	5-methylcytosine DNA glycosylase/lyase, Demethylation of retrotransposon Tos17, Promotion of Tos17 transposition, Seed developmen						8	pink	4		0.00492862	-0.00333445	-0.00386158						1.89	0.15	2.28333	0.41	0.51	0.34	1.66333	0.163333	-3.70264	-2.87159	-0.789081	-3.73357	1.06589	1.60116	0.234848
TraesCS1B03G0799300	TraesCS1B02G287100	TraesCS1B01G287100	TRIAE_CS42_1BL_TGACv1_030998_AA0105470	Traes_1BL_3CB681BC5		123135181	LOC123135181	XP_044410206.1	uncharacterized protein LOC123135181			BRADI_2g23780v3	hypothetical protein		Os05g0446900		Glycoside hydrolase, carbohydrate-binding domain containing protein						29	saddlebrown			-0.00880305	-0.00158382	-0.0101408						3.17667	6.63333	4.68333	17.2367	1.24667	8.11	1.28667	6.94	0.997937	1.69445	2.63595	1.86098	1.15205	0.636613	0.455534
TraesCS1B03G0800900	TraesCS1B02G287500	TraesCS1B01G287500	TRIAE_CS42_1BL_TGACv1_034386_AA0144360			123135370	LOC123135370	XP_044410349.1	uncharacterized protein LOC123135370			BRADI_2g23750v3	hypothetical protein		Os05g0447700		Tetratricopeptide-like helical domain containing protein						7	black			0.0059305	-0.0113537	0.0090308						158.687	61.79	74.65	32.02	78.1033	17.26	90.07	57.0833	-1.53552	-1.53393	-2.20999	-1.17737	-1.1483	-1.27654	-1.14989
TraesCS1B03G0802400	TraesCS1B02G287800	TraesCS1B01G287800	TRIAE_CS42_1BL_TGACv1_031634_AA0117550	Traes_1BL_A9A3B8388	Ta.25383.1.A1_at	123135376	LOC123135376	XP_044410354.1	uncharacterized acetyltransferase At3g50280-like			BRADI_2g23740v3	hypothetical protein		Os05g0449200		Transferase family protein						31	paleturquoise			0.000325132	-0.0120012	0.0184325						30.95	22.7433	9.31	2.81667	8.69667	3.83667	8.61	25.8467	-0.517186	-1.84054	-1.22967	1.17308	-3.07615	-2.25191	-1.7528
TraesCS1B03G0806900	TraesCS1B02G288600	TraesCS1B01G288600	TRIAE_CS42_1BL_TGACv1_030567_AA0094200	Traes_1BL_332C278BD	TaAffx.112378.2.S1_x_at	123058397	LOC123058397	XP_044337067.1	protein LSD1			BRADI_3g16400v3	hypothetical protein		Os08g0159500	OsLSD1	Similar to Zinc-finger protein Lsd1		AT1G32540	LOL1	lsd one like 1 [Source:TAIR;Acc:AT1G32540]		1	turquoise			0.0017944	0.00557142	-0.00441041						30.7067	40.6867	54.81	24.3	31.97	81.47	59.0633	28.5933	0.29194	-1.30271	1.1842	-1.63738	-0.766651	2.01866	0.828001
TraesCS1B03G0807600	TraesCS1B02G288800	TraesCS1B01G288800	TRIAE_CS42_1BL_TGACv1_030567_AA0094160	Traes_1BL_472CC21B6		123135538	LOC123135538	XP_044410586.1	O-fucosyltransferase 19-like isoform X2			BRADI_2g23650v3	hypothetical protein		Os05g0451900	OsSTA151	Similar to Axi 1 (Auxin-independent growth promoter)-like protein		AT2G37980	OFUT19	O-fucosyltransferase 19 [Source:UniProtKB/Swiss-Prot;Acc:Q9SH89]		19	lightyellow	391		-0.0070792	-0.00184745	0.00126224						1.01667	3.28	0.83	2.71667	0.653333	2.22333	0.25	3.52	1.18154	1.05724	1.32905	2.57096	-0.491732	-0.135558	-0.367425
TraesCS1B03G0808200	TraesCS1B02G289100	TraesCS1B01G289100	TRIAE_CS42_1BL_TGACv1_032224_AA0127030	Traes_1BL_4C3C75D3A	TaAffx.118832.1.S1_at	123135567	LOC123135567	XP_044410624.1	protein TANC2-like isoform X2			BRADI_2g23634v3	hypothetical protein										27	white			0.00366828	-0.00384457	-0.00380647						2.14	1.41	3.41	1.92	2.07	0.93	2.73	0.67	-0.963842	-1.02038	-1.60132	-2.40612	0.373025	0.738936	0.429561
TraesCS1B03G0810500	TraesCS1B02G290000	TraesCS1B01G290000	TRIAE_CS42_1BL_TGACv1_031356_AA0112250	Traes_1BL_1314058E4		123135655	LOC123135655	XP_044410771.1	uncharacterized protein LOC123135655			BRADI_2g23540v3	hypothetical protein		Os05g0454500		Conserved hypothetical protein						30	steelblue			0.0193585	-0.0194431	0.0221578						555.027	59.1033	73.8	8.97	429.963	4.33	197.947	24.42	-3.33832	-3.32093	-6.63544	-3.43681	-2.96717	-2.00709	-2.98456
TraesCS1B03G0814000	TraesCS1B02G291500	TraesCS1B01G291500	TRIAE_CS42_1BL_TGACv1_030775_AA0100490	Traes_1BL_4D2CB33FC	Ta.332.2.A1_x_at	123135793	LOC123135793	XP_044410943.1	aldo-keto reductase family 4 member C10-like						Os05g0456300	AKR4C15	Aldose reductase						35	sienna3	13		-0.0133253	-0.00153145	-0.00524356						0.396667	10.7567	1.41	9.15667	0.553333	4.17667	0.136667	6.21667	4.63622	2.31954	3.14641	4.99327	-0.507185	-0.0793133	1.8095
TraesCS1B03G0814200	TraesCS1B02G291700	TraesCS1B01G291700	TRIAE_CS42_1BL_TGACv1_030695_AA0098100	Traes_1BL_FCB7413C8		123093556	LOC123093556	XP_044371476.1	uncharacterized protein LOC123093556			BRADI_2g23445v3	hypothetical protein		Os05g0456900		Conserved hypothetical protein		AT5G02090		Uncharacterized protein At5g02090/T7H20_140 [Source:UniProtKB/TrEMBL;Acc:Q9LZM2]		7	black			0.00547688	-0.00892815	0.00874337						3.73667	3.78667	3.5	0.53	3.45667	0	4.49	1.84667	-0.125302	-2.74746	-5.19098	-1.36358	-2.70138	-4.36433	-0.0792165
TraesCS1B03G0819100	TraesCS1B02G294200	TraesCS1B01G294200	TRIAE_CS42_1BL_TGACv1_030626_AA0096220	Traes_1BL_0FC423766	Ta.30628.2.S1_at	123135971	LOC123135971	XP_044411180.1	60S ribosomal protein L36-3-like			BRADI_2g23260v3	hypothetical protein		Os05g0459900		Similar to 60S ribosomal protein L36-1		AT3G53740	RPL36B	60S ribosomal protein L36 [Source:UniProtKB/TrEMBL;Acc:A0A178VA59]		11	greenyellow	260		-0.000976883	0.00594477	-0.011513						53.97	36.2	76.53	79.56	33.33	167.76	50.1333	43.7767	-0.521535	-0.305843	2.53049	-0.704613	0.820221	2.60375	0.60453
TraesCS1B03G0819300	TraesCS1B02G294300	TraesCS1B01G294300	TRIAE_CS42_1BL_TGACv1_030626_AA0096230	Traes_1BL_627D564A9	Ta.15522.2.S1_x_at	123135982	LOC123135982	XP_044411195.1	heat shock 70 kDa protein 4-like			BRADI_2g23250v3	hypothetical protein		Os01g0840100	OsMed37_1	Heat shock protein Hsp70 family protein		AT3G12580	MED37C	Probable mediator of RNA polymerase II transcription subunit 37c [Source:UniProtKB/Swiss-Prot;Acc:Q9LHA8]		27	white			0.00255633	-0.00645686	0.00269086						2.00667	1.91667	2.99333	0.65	1.18333	0.25	2.00667	1.45667	0.173564	-2.41303	-1.89456	-1.11982	-2.02021	-1.66589	0.566386
TraesCS1B03G0821800	TraesCS1B02G295400	TraesCS1B01G295400																					1	turquoise	773		-0.00860468	0.0179328	-0.00703446						0	0	0	2.23667	0	16.3433	0	2.37667	3.19069	8.01891	9.83308	6.97401	4.79247	3.65482	0
TraesCS1B03G0821900	TraesCS1B02G295500	TraesCS1B01G295500	TRIAE_CS42_1BL_TGACv1_030295_AA0085760	Traes_1BL_12E37FACA	Ta.2957.1.S1_at	123136143	LOC123136143	XP_044411393.1	coatomer subunit zeta-1-like			BRADI_2g23150v3	hypothetical protein		Os05g0461000		Clathrin adaptor, sigma subunit/coatomer, zeta subunit domain containing protein						9	magenta	187		-0.00769733	-0.000496637	-0.00232315						1.89	3.33	1.23	4.22	0.29	3.65667	0.496667	4.13	1.75815	3.02653	5.12055	2.82283	1.6147	1.54259	0.346309
TraesCS1B03G0825500	TraesCS1B02G296900	TraesCS1B01G296900	TRIAE_CS42_1BL_TGACv1_032734_AA0133460	Traes_1BL_A2EB47A26	Ta.26833.1.A1_at	123136196	LOC123136196	XP_044411453.1	protein CANDIDATE G-PROTEIN COUPLED RECEPTOR 7-like			BRADI_2g23027v3	hypothetical protein		Os05g0462500		Transmembrane receptor, eukaryota domain containing protein		AT3G09570		At3g09570 [Source:UniProtKB/TrEMBL;Acc:Q9C5T6]		16	lightcyan	136		-0.00658136	-0.00140725	-0.00354499						1.67333	3.27333	2.15	4.26333	0.67	3.83667	0.763333	4.13333	0.639845	0.817094	2.51326	1.48204	0.488243	-0.140966	0.310994
TraesCS1B03G0830700	TraesCS1B02G299100	TraesCS1B01G299100	TRIAE_CS42_1BL_TGACv1_031696_AA0119100	Traes_1BL_91AE5E638																			28	skyblue			0.00174812	-0.00103172	-0.000560843						0	0.986667	4.73667	1.54	2.22667	0.806667	1.29	2.27	0.0198434	-0.893951	-2.90975	-0.901326	-1.071	-0.909523	-0.157206
TraesCS1B03G0830800	TraesCS1B02G299200	TraesCS1B01G299200				123093811	LOC123093811	XP_044371803.1	uncharacterized protein LOC123093811			BRADI_2g22880v3	hypothetical protein										30	steelblue			-0.00594982	-0.00288038	-0.00325956						66.98	17.13	14.5867	15.4833	8.65667	57.3433	2.69	24.77	-1.7953	1.34939	2.23134	2.41319	0.316597	2.78916	-2.82809
TraesCS1B03G0831000	TraesCS1B02G299300	TraesCS1B01G299300	TRIAE_CS42_1BL_TGACv1_031696_AA0119070	Traes_1BL_E977DCEF3	Ta.30935.1.S1_at																		1	turquoise			0.00110863	0.00784662	0.0148882						149.68	23.59	5.92333	8.08	129.07	184.957	6.57667	31.38	-2.57937	0.357318	0.888159	2.03434	-1.63873	3.51514	-4.57542
TraesCS1B03G0834500	TraesCS1B02G301400	TraesCS1B01G301400	TRIAE_CS42_1BL_TGACv1_031678_AA0118630	Traes_1BL_E861D2D21											Os05g0466800		Similar to CTD small phosphatase-like protein						3	brown			-0.00161043	-0.00639518	0.00277443						2.53667	2.17667	2.06	2.06333	0.86	0.54	1.42667	2.96667	0.306156	-0.649259	-1.53214	0.535245	-0.865328	-2.22445	0.0900867
TraesCS1B03G0840700	TraesCS1B02G304600	TraesCS1B01G304600	TRIAE_CS42_1BL_TGACv1_031388_AA0112970									BRADI_3g37321v3	hypothetical protein		Os08g0448100		Conserved hypothetical protein		AT5G57510		Cotton fiber protein [Source:UniProtKB/TrEMBL;Acc:Q9FKM0]		2	blue	167		-0.00419704	-0.00213145	0.0122347						0.79	0.723333	0.33	0.57	0.486667	0.34	0	4.08	-0.148922	1.05989	0.725484	5.64301	-0.585884	-2.16897	-1.7947
TraesCS1B03G0841400	TraesCS1B02G304700	TraesCS1B01G304700	TRIAE_CS42_1BL_TGACv1_032815_AA0134370	Traes_1BL_09CBCDAF5								BRADI_1g68190v3	hypothetical protein		Os07g0549900		Similar to Histone H4		AT5G59970		Histone H4 [Source:UniProtKB/TrEMBL;Acc:Q6NR90]		39	orangered4	34		-0.00723508	7.39134e-05	-0.00557551						1.64	3.95	1.73333	7.55	0.776667	3.81	1.11667	4.04333	0.950297	1.76461	2.5234	0.909848	0.838766	0.898154	0.0244489
TraesCS1B03G0841700	TraesCS1B02G304800	TraesCS1B01G304800	TRIAE_CS42_1BL_TGACv1_032454_AA0130080	Traes_1BL_5D23F5133		123094021	LOC123094021	XP_044372037.1	UPF0098 protein CPn_0877/CP_0992/CPj0877/CpB0906-like			BRADI_2g22660v3	hypothetical protein		Os05g0468800		Phosphatidylethanolamine-binding protein PEBP domain containing protein		AT5G01300		PEBP (Phosphatidylethanolamine-binding protein) family protein [Source:UniProtKB/TrEMBL;Acc:Q9M042]		1	turquoise	592		-0.0101171	0.0333427	-0.0266452		1				0.82	0.713333	1.48	19.03	1.14667	306.667	2.55333	3.20667	-0.526884	3.7875	7.61091	0.481932	4.0726	7.1692	-0.241785
TraesCS1B03G0841800	TraesCS4B02G162300	TraesCS4B01G162300				123136708	LOC123136708	XP_044412121.1	RING-H2 finger protein ATL66-like			BRADI_2g22650v3	hypothetical protein		Os05g0468900		Zinc finger, RING/FYVE/PHD-type domain containing protein						19	lightyellow	16		-0.00633174	-0.00218224	0.00163399						2.16667	2.62333	1.16333	3.38	0.943333	2.44	0.286667	4.37	-0.0750619	1.42505	1.18019	3.73611	0.436581	-0.25714	-1.06353
TraesCS1B03G0842800	TraesCS1B02G305200	TraesCS1B01G305200	TRIAE_CS42_1BL_TGACv1_033429_AA0139390	Traes_1BL_CFD471B75	Ta.8590.1.S1_at	123136738	LOC123136738	XP_044412163.1	protein MALE DISCOVERER 2-like			BRADI_2g22610v3	hypothetical protein		Os05g0471000		Similar to Ser-thr protein kinase (Fragment)						37	skyblue3			-0.000862248	-0.011719	0.00486879						7.43667	4.37333	7.2	2.11333	2.23333	1.11667	0.94	5.89	-0.881389	-1.75176	-0.956427	2.34302	-0.94918	-2.10408	-0.078813
TraesCS1B03G0845600	TraesCS1B02G306500	TraesCS1B01G306500	TRIAE_CS42_1BL_TGACv1_030324_AA0086730			123136815	LOC123136815	XP_044412259.1	zinc transporter 5-like			BRADI_2g22520v3	hypothetical protein		Os05g0472700	OsZIP5	Similar to Metal transport protein						1	turquoise	555		-0.00376878	0.00668129	-0.00188657						0.36	0.906667	0.316667	0.926667	0.343333	3.67	0.463333	1.32	1.63052	0.735375	4.40086	1.50371	-0.560403	2.04599	0.334741
TraesCS1B03G0848500	TraesCS1B02G308200	TraesCS1B01G308200	TRIAE_CS42_1BL_TGACv1_031863_AA0121910	Traes_1BL_EE1779900		123136873	LOC123136873	XP_044412314.1	WRKY transcription factor WRKY24-like			BRADI_2g22440v3	hypothetical protein		Os05g0474800	OsWRKY70	WRKY transcription factor 70						6	red			-0.00670784	-0.00735007	0.003117						4.68333	5.01	2.29333	4.63333	2.10667	2.40333	0.0466667	6.66	-0.0552141	0.746855	0.0711273	5.75869	-0.452049	-1.14633	-1.25412
[truncated: 11,832 more rows]
[truncated: 13 more columns]

## Sheet: DEFE_Stats
P(M/ctrl, WM/ctrl, SN/ctrl, N/ctrl)			C(WM/M, N/SN)			K(WMctrl/Mctrl, Nctrl/SNctrl)					P****++C**++K**		12676		P****++C11++K**		189		P****++C22++K**		202
P0000	851		C00	8430		K00	10778				P0000++C00++K00	0			P0101++C11++K00	63			P1010++C22++K00	64
[truncated: 6,560 more rows]

## Sheet: ClusterTraitCor
dynamicColors	dynamicMods	Freq	Positive	Negative	Cold	Cold_winter_habit	Cold_spring_habit	DGDG(34:6)	DGDG(34:5)	DGDG(34:4)	DGDG(34:3)	DGDG(34:2)	DGDG(34:1)	DGDG(36:6)	DGDG(36:5)	DGDG(36:4)	DGDG(36:3)	DGDG(36:2)	DGDG(36:1)	DGDG(38:6)	DGDG(38:5)	Total_DGDG	MGDG(34:6)	MGDG(34:5)	MGDG(34:4)	MGDG(34:3)	MGDG(34:2)	MGDG(34:1)	MGDG(36:6)	MGDG(36:5)	MGDG(36:4)	MGDG(36:3)	MGDG(36:2)	MGDG(38:6)	MGDG(38:5)	MGDG(38:4)	Total_MGDG	PG(16:1)	PG(32:1)	PG(32:0)	PG(34:4)	PG(34:3)	PG(34:2)	PG(34:1)	PG(34:0)	PG(36:6)	PG(36:5)	PG(36:4)	PG(36:3)
[truncated: 54 more rows]
[truncated: 377 more columns]
