# Supplementary material for: Computational genomics insights into cold acclimation in wheat
Source: Front Genet. 2022 Oct 20;13:1015673. doi: 10.3389/fgene.2022.1015673 (PMC9632429; doi:10.3389/fgene.2022.1015673)
Supplement: Supplementary file 8 [file Table5.XLSX]

## Sheet: School_A(PG(34_4)_nodes
nodeName		entireNet	Subnet	Gene name		Association Strength
PG(34:4)		404	371		Description		entire net	subnet
TraesCS5D03G0133600	TraesCS5D03G0133600	494	347			average degree	125.815	89.6075
TraesCS5B03G0981700	LOC123113328	421	344		beta-glucosidase BoGH3B-like	Strength	0.00975306	0.24088
TraesCS3D03G0688500	LOC123079278	550	335		protein DETOXIFICATION 32-like
TraesCS4A03G0171400	HISN4	458	319		imidazole glycerol phosphate synthase hisHF, chloroplastic-like
TraesCS1A03G0634400	TraesCS1A03G0634400	504	306		Similar to Methylase
TraesCS4D03G0534700	HISN4	406	305		imidazole glycerol phosphate synthase hisHF, chloroplastic-like
TraesCS2A03G0132800	G6PD2	408	293	OsG6PDH3	glucose-6-phosphate 1-dehydrogenase 2, chloroplastic-like isoform X2
TraesCS2B03G1186800	LOC123046630	462	292		33 kDa ribonucleoprotein, chloroplastic-like
TraesCS3B03G0642900	LOC123070065	417	290		transcription factor MYBS3-like
TraesCS2B03G0959500	LOC123045920	403	276		protein CHROMOSOME TRANSMISSION FIDELITY 7-like
TraesCS7D03G1271400	NIP1-2	307	275		aquaporin NIP1-3-like
TraesCS2A03G0239600	LOC123187567	412	273		uncharacterized protein LOC123187567
TraesCS1D03G0790100	LOC123182598	384	270		S-adenosyl-L-methionine-dependent methyltransferases superfamily protein
TraesCS1B03G0723500	LOC123131411	395	263		EEF1A lysine methyltransferase 4-like isoform X1
TraesCS2B03G0463700	LOC123044187	293	261		calmodulin-1-like
TraesCS5B03G0189200	LOC123115764	303	256		putative lipid-transfer protein DIR1
TraesCS1B03G0693100	LOC123129630	278	255		serine/arginine-rich-splicing factor SR34-like isoform X2
TraesCS6D03G0043600	LOC123143010	446	254		7-deoxyloganetin glucosyltransferase-like
TraesCS2A03G1000800	LOC123190158	323	249		probable LRR receptor-like serine/threonine-protein kinase At1g56140
TraesCS4D03G0657600	LOC123098512	467	249		Protein of unknown function DUF506, plant family protein
TraesCS1D03G0602900	TraesCS1D03G0602900	268	236
TraesCS1A03G0847000	LOC123063657	319	233		uncharacterized protein LOC123063657
TraesCS5B03G1049400	LOC123113568	263	228		WPP domain-associated protein-like isoform X2
TraesCS5D03G0361600	OsPP117	251	228	OsPP117	phosphoglucan phosphatase LSF2, chloroplastic-like
TraesCS2D03G1277600	LOC123055294	430	224		AT-hook motif nuclear-localized protein 9-like
TraesCS7A03G0292200	TraesCS7A03G0292200	274	224
TraesCS2A03G1214500	IIP5	343	218	IIP5	Similar to ORW1943Ba0077G13.1 protein
TraesCS3B03G1028000	ASE1	391	217	ASE1	amidophosphoribosyltransferase, chloroplastic-like
TraesCS4D03G0833000	LOC123099141	284	217		2-oxoglutarate-dependent dioxygenase 11-like
TraesCS7A03G0243900	LOC123148974	250	217		cysteine synthase-like
TraesCS3D03G0529600	LOC123074534	245	216		ervatamin-B-like
TraesCS2D03G0196100	ZRP4	242	208	ZRP4	Similar to O-methyltransferase ZRP4 (EC 2.1.1.-
TraesCS5D03G0444000	LOC123103487	263	208		ubiquitin-conjugating enzyme E2 36-like
TraesCS1A03G0479500	NIP3	332	207	NIP3	aquaporin NIP3-1-like
TraesCS5B03G0798700	OsUGE3	236	206	UGE1	Bifunctional UDP-glucose 4-epimerase and UDP-xylose 4-epimerase 1
TraesCS1A03G1060100	TraesCS1A03G1060100	342	204
TraesCS7D03G0357800	LOC123168602	325	203		loricrin-like
TraesCS2D03G0361400	LOC123049003	225	197		calmodulin-1-like
TraesCS2D03G1002600	LOC123054503	270	197		33 kDa ribonucleoprotein, chloroplastic-like
TraesCS5A03G1162700	LOC123108296	248	195		trans-cinnamate:CoA ligase, peroxisomal-like
TraesCS4A03G0752500	TBP2	227	193	TBP2	TATA-box-binding protein 2 isoform X1
TraesCS4B03G0032400	TBP2	217	193	OsTBP2	TATA-box-binding protein 2 isoform X1
TraesCS6B03G0234700	LOC123135928	218	190		lon protease-like
TraesCS4B03G0662400	TraesCS4B03G0662400	309	189
TraesCS2A03G0345600	LOC123187929	264	187		calmodulin-1-like
TraesCS7B03G0003100	LOC123159742	451	183		rhodanese-like domain-containing protein 8, chloroplastic isoform X1
TraesCS4D03G0522100	LOC123085384	248	181		uncharacterized protein LOC123085384 isoform X2
TraesCS5D03G0890100	LOC123122838	200	179		beta-glucosidase BoGH3B-like
TraesCS1A03G0968400	LOC123068230	283	177		protein N-lysine methyltransferase METTL21A-like
TraesCS7A03G0539000	LOC123150865	360	177		sulfofructose kinase-like
TraesCS1D03G0594600	LOC123181892	220	174		EEF1A lysine methyltransferase 4-like isoform X1
TraesCS3A03G0371900	LOC123060840	281	174		probable protein ABIL3
TraesCS1D03G0777800	TRX1	225	173		thioredoxin H1-like
TraesCS3D03G0166700	TraesCS3D03G0166700	202	171		2,3-diketo-5-methylthio-1-phosphopentane phosphatase domain containing protein
TraesCS7B03G1178300	MutM	259	171	MutM	DNA glycosylase/AP lyase domain containing protein
TraesCS2D03G0248000	OsObgC1	276	167	OsObgC1	probable GTP-binding protein OBGC1, chloroplastic
TraesCS1A03G0308600	LOC123041551	245	163		peroxidase 42-like isoform X2
TraesCS1A03G1079100	TraesCS1A03G1079100	208	161
TraesCS3A03G0219400	OsPP2C01	180	160	OsPP2C01	probable protein phosphatase 2C 1 isoform X1
TraesCS4A03G0681400	TraesCS4A03G0681400	181	158
TraesCS1D03G0452900	NIP3	385	157	NIP3	aquaporin NIP3-1-like
TraesCS4A03G1245300	LOC123088656	227	155		protein ENHANCED PSEUDOMONAS SUSCEPTIBILITY 1-like
TraesCS2D03G0467500	PSBQ1	250	153		oxygen-evolving enhancer protein 3, chloroplastic-like
TraesCS4A03G0188400	LOC123085384	193	153		uncharacterized protein LOC123085384 isoform X2
TraesCS4A03G0491700	OsSCP13	328	153	OsSCP13	Peptidase S10, serine carboxypeptidase family protein
TraesCS7D03G0824300	TraesCS7D03G0824300	171	153		Homeodomain-like containing protein
TraesCS3A03G0996200	LOC123063106	196	151		4-sulfomuconolactone hydrolase-like
TraesCS1B03G1072800	TraesCS1B03G1072800	260	150
TraesCS4B03G0080200	LOC123090774	380	148		uncharacterized protein LOC123090774
TraesCS2A03G0337700	TraesCS2A03G0337700	166	147
TraesCS5A03G0410400	OsPP117	272	147	LSF2	Phosphoglucan phosphatase LSF2, chloroplastic [Source:UniProtKB/Swiss-Prot;Acc:Q9SRK5]
TraesCS5A03G1140600	LOC123105717	219	147		pectin acetylesterase 3-like
TraesCS1B03G0192900	RSR1	195	146	RSR1	APETALA2-like protein 1 isoform X1
TraesCS5B03G1066300	TraesCS5B03G1066300	172	146
TraesCS4A03G0604400	LOC123082221	269	145		Epsin-like, N-terminal domain containing protein
TraesCS5D03G1125100	LOC123123655	202	145		uncharacterized protein LOC123123655
TraesCS1D03G0373000	LOC123181000	285	144		protein NRT1/ PTR FAMILY 5.2-like
TraesCS3B03G0616600	OsGLYR2	247	142	GLYR2	Glyoxylate/succinic semialdehyde reductase 2, chloroplastic [Source:UniProtKB/Swiss-Prot;Acc:F4I907]
TraesCS7B03G0698500	LOC123164246	162	142		protein OVEREXPRESSOR OF CATIONIC PEROXIDASE 3-like
TraesCS3B03G1330400	LOC123066592	403	140		glucan endo-1,3-beta-glucosidase GI-like
TraesCS3A03G0754500	TraesCS3A03G0754500	168	138
TraesCS7A03G0373600	LOC123151061	156	138		glycine-rich cell wall structural protein 1.0-like
TraesCS7B03G0393800	TraesCS7B03G0393800	331	138
TraesCS7D03G0176900	LOC123166753	159	137		uncharacterized protein LOC123166753
TraesCS2D03G0524400	LOC123052703	278	134		vacuolar protein sorting-associated protein 32 homolog 1-like
TraesCS2B03G0541200	LOC123044481	256	132		uncharacterized protein LOC123044481
TraesCS2B03G1322200	OsGLN2	271	132	GLN2	Glutamine synthetase, chloroplastic/mitochondrial [Source:UniProtKB/Swiss-Prot;Acc:Q43127]
TraesCS3A03G1082900	LOC123063322	295	132		uncharacterized protein LOC123063322 isoform X1
TraesCS5D03G0500400	LOC123121492	158	132		uncharacterized protein LOC123121492 isoform X2
TraesCS7A03G0492900	SE1	148	132	SE1	zinc finger protein HD1-like isoform X1
TraesCS5A03G0931300	LOC123105034	147	130		beta-glucosidase BoGH3B-like
TraesCS2D03G0240900	PsaN	146	129	PsaN	photosystem I reaction center subunit N, chloroplastic
TraesCS3A03G0209200	LOC123060276	196	129		cellulose synthase A catalytic subunit 7
TraesCS7A03G1134500	LOC123149120	182	129		uncharacterized protein LOC123149120
TraesCS2B03G0698600	PsaK	224	127	PsaK	photosystem I reaction center subunit psaK, chloroplastic-like
TraesCS5B03G0509600	LOC123111805	301	127		uncharacterized protein LOC123111805
TraesCS7B03G0053800	LOC123160439	302	127		protein NRT1/ PTR FAMILY 2.3-like
TraesCS2B03G0503500	DRD1	149	126	DRD1	protein CHROMATIN REMODELING 35-like isoform X2
TraesCS7B03G0170900	TraesCS7B03G0170900	158	125
TraesCS2A03G0873900	LOC123189686	144	123		calcium uptake protein, mitochondrial-like
TraesCS3A03G0396300	TraesCS3A03G0396300	146	123
TraesCS5B03G0127200	PPX	296	123	PPOX1	protoporphyrinogen oxidase, chloroplastic-like
TraesCS7B03G1087800	LOC123161482	143	123		DIMBOA UDP-glucosyltransferase BX8-like
TraesCS3A03G1192100	LOC123063547	161	119		DIMBOA UDP-glucosyltransferase BX9-like
TraesCS3B03G1145300	LOC123067757	229	117		uncharacterized protein LOC123067757
TraesCS6B03G0199900	TraesCS6B03G0199900	171	117
TraesCS4D03G0165900	TraesCS4D03G0165900	173	116
TraesCS3A03G0053400	LOC123059867	198	113		peroxisomal membrane protein PEX14-like isoform X1
TraesCS4B03G0155100	ARP1	135	113	ARP1	dormancy-associated protein 1-like
TraesCS7A03G0610900	OsBBX26	142	113	OsBBX26	zinc finger protein CONSTANS-LIKE 14-like
TraesCS4D03G0050400	LOC123095751	193	112		Similar to Pherophorin-S precursor
TraesCS5D03G0893700	TPKA	129	112	TPKA	two pore potassium channel a-like
TraesCS5A03G1279700	LOC123108541	130	110		metacaspase-1-like
TraesCS7A03G0824800	LOC123147773	228	109	CBBY	CBBY-like protein
TraesCS2D03G1170700	IIP5	123	106	IIP5	Similar to ORW1943Ba0077G13.1 protein
TraesCS5D03G0979300	LOC123123199	132	106		U3 small nucleolar RNA-associated protein 18 homolog
TraesCS3B03G1211400	LOC123072181	126	104		flowering-promoting factor 1-like protein 2
TraesCS3D03G0928400	LOC123080301	139	104		2-pyrone-4,6-dicarboxylate hydrolase-like
TraesCS1A03G0788400	TraesCS1A03G0788400	128	103
TraesCS1D03G0814800	LOC123182685	120	103		uncharacterized protein LOC123182685
TraesCS4B03G0327300	RCA	151	103	RCA	ribulose bisphosphate carboxylase/oxygenase activase B, chloroplastic
TraesCS5A03G1189600	LOC100526756	117	103	JRLL1	Jacalin-related lectin 1
TraesCS4A03G0744900	LOC123087311	126	102		pentatricopeptide repeat-containing protein At2g01860-like
TraesCS3D03G0946400	OsMC1	114	100	OsMC1	metacaspase-1-like
TraesCS4A03G0963200	LOC123087971	140	99		uncharacterized protein LOC123087971 isoform X1
TraesCS4B03G0923800	LOC123089584	165	99		F-box protein PP2-A13-like
TraesCS4A03G0821500	LOC123087586	118	98		uncharacterized protein LOC123087586
TraesCS3A03G0943600	LOC123058925	119	97		uncharacterized protein LOC123058925
TraesCS2A03G1311600	LOC123191120	146	96		AT-hook motif nuclear-localized protein 9-like
TraesCS2D03G0582100	INT2	118	95		probable inositol transporter 2
TraesCS3A03G0720500	OsRZFP34	122	95	RZFP34	probable E3 ubiquitin-protein ligase RZFP34 isoform X1
TraesCS3A03G0790100	LOC123062311	190	95		serine carboxypeptidase-like 18
TraesCS4D03G0156100	LOC123096173	121	94		Similar to ProFAR isomerase associated family protein, expressed
TraesCS7B03G0306900	SE1	114	94	SE1	zinc finger protein HD1-like isoform X1
TraesCS2A03G1166300	OsGLN2	118	92	OsGLN2	glutamine synthetase leaf isozyme, chloroplastic
TraesCS2B03G0027300	LOC123043077	125	92		pyruvate dehydrogenase E1 component subunit alpha-3, chloroplastic isoform X1
TraesCS5A03G0471800	TraesCS5A03G0471800	107	92
TraesCS3A03G1028300	LOC123059076	105	91		transcription factor BHLH6-like isoform X1
TraesCS4D03G0841400	LOC123099201	110	91		metacaspase-1-like
TraesCS7D03G0551500	pi55-1	152	91	PIRL4	Plant intracellular Ras-group-related LRR protein 4
TraesCS4D03G0130100	OsCBL3	130	90	CBL3	calcineurin B-like 3
TraesCS5D03G0878400	LOC123122793	107	90		Aluminum induced protein with YGL and LRDR motifs
TraesCS3B03G0780600	LOC123070584	104	88		putative ubiquitin-conjugating enzyme E2 38
TraesCS3B03G1196000	LOC123072146	113	87		beta-glucosidase 5-like isoform X2
TraesCS1B03G0591800	NIP3	102	85	NIP3	aquaporin NIP3-1
TraesCS7B03G0306700	prx77	96	84	prx77	peroxidase 11-like
TraesCS4A03G0069900	LOC123084912	100	82		uncharacterized protein LOC123084912
TraesCS5D03G0479000	LOC123121398	122	81		protein STRICTOSIDINE SYNTHASE-LIKE 10-like
TraesCS3A03G0694500	CLPB1	137	80		chaperone protein ClpB1-like
TraesCS7A03G1267400	LOC123149579	91	80		Hypothetical conserved gene
TraesCS4A03G0002900	LOC123084673	90	78		Zinc finger, FYVE/PHD-type domain containing protein
TraesCS6B03G1088900	XBOS32	90	78	XBOS32	probable E3 ubiquitin-protein ligase XBOS32
TraesCS7D03G1052900	LOC123166700	96	78		carbonic anhydrase, chloroplastic-like
TraesCS2D03G0619100	LOC123049295	89	76		flowering-promoting factor 1-like protein 4
TraesCS3A03G0815600	LOC123062419	114	76		cytochrome P450 704C1-like isoform X5
TraesCS3B03G0353200	LOC123069099	92	76		uncharacterized protein At1g15400-like
TraesCS4A03G0560500	LOC123082149	88	76		heavy metal-associated isoprenylated plant protein 23-like
TraesCS4D03G0627100	LOC123098396	92	76		uncharacterized protein LOC123098396 isoform X1
TraesCS5A03G0368300	IPMS2	114	76	IPMS2	2-isopropylmalate synthase A-like
TraesCS5D03G0435100	AKHSDH1	90	76	AKHSDH1	Bifunctional aspartokinase/homoserine dehydrogenase 1, chloroplastic [Source:UniProtKB/Swiss-Prot;Acc:Q9SA18]
TraesCS4A03G0533000	LOC123086514	91	75		cyclin-T1-3-like
TraesCS3B03G0397500	GCP1	108	74		probable tRNA N6-adenosine threonylcarbamoyltransferase, mitochondrial isoform X1
TraesCS5B03G0598300	LOC123116239	93	74		uncharacterized protein LOC123116239
TraesCS5B03G1140700	LOC123113835	93	74		uncharacterized protein LOC123113835
TraesCS5B03G1355600	LOC123117868	86	73		F-box protein PP2-B1-like
TraesCS2D03G1134400	SULTR3	89	72	SULTR3	probable sulfate transporter 3.3
TraesCS3A03G0265900	LOC123060471	93	72		auxin-responsive protein IAA1-like
TraesCS5A03G1278000	LOC123106155	153	72		protein ETHYLENE-INSENSITIVE 2-like isoform X1
TraesCS7A03G0209400	LOC123150076	105	72		dormancy-associated protein homolog 3-like
TraesCS7D03G0611800	CYP78A9	87	72	CYP78A9	cytochrome P450 78A9-like
TraesCS3A03G0184200	OsTLP27	153	71	OsTLP27	thylakoid lumenal 17.9 kDa protein, chloroplastic-like
TraesCS5B03G0407400	OsPP117	85	71	OsPP117	phosphoglucan phosphatase LSF2, chloroplastic-like
TraesCS5B03G1219100	OASA1	87	70	OASA1	anthranilate synthase alpha subunit 1, chloroplastic-like
TraesCS5A03G0112400	LOC123106500	82	69		protein ACCELERATED CELL DEATH 6-like
TraesCS7A03G0548700	Osh69	84	69	RFS1	probable galactinol--sucrose galactosyltransferase 1 isoform X2
TraesCS7D03G0188900	LOC123166688	85	69		dormancy-associated protein homolog 3-like
TraesCS2D03G0844800	OsTRX	81	68	OsTRX	Similar to Thioredoxin 1 (TRX-1) (Thioredoxin M)
TraesCS3B03G1017600	TraesCS3B03G1017600	101	68
TraesCS4A03G0170100	OsBgal8	81	68	OsBgal8	beta-galactosidase 6-like
TraesCS6B03G0929100	TraesCS6B03G0929100	85	68
TraesCS1B03G1065800	LOC123143861	82	67		uncharacterized protein LOC123143861 isoform X1
TraesCS1B03G1184200	WTF1	84	67	WTF1	protein WHAT'S THIS FACTOR 1 homolog, chloroplastic-like
TraesCS3D03G0642800	LOC123079077	81	67		uncharacterized protein LOC123079077
TraesCS5B03G0520000	OsEno1	91	67	OsEno1	enolase 1, chloroplastic-like
TraesCS2A03G0910800	LOC123185728	81	66		putative GEM-like protein 8
TraesCS2A03G1334600	LOC123186690	80	66		peroxidase 12-like
TraesCS2D03G0355800	LOC123052032	78	66		copper-transporting ATPase PAA1, chloroplastic-like isoform X1
TraesCS2D03G1099200	LOC123054797	75	66		uncharacterized protein LOC123054797
TraesCS7A03G0679300	OsCYP38	139	66	OsCYP38	peptidyl-prolyl cis-trans isomerase, chloroplastic-like isoform X2
TraesCS1A03G0222200	TraesCS1A03G0222200	75	65
TraesCS2A03G0608600	AIR9	81	65		187-kDa microtubule-associated protein AIR9-like isoform X2
TraesCS5B03G0256900	LOC123115845	79	65		putative glutaredoxin-C14
TraesCS6B03G0179100	LOC123135746	79	65		putative disease resistance protein At3g14460 isoform X1
TraesCS2A03G0649900	TraesCS2A03G0649900	79	64		Homeodomain-related domain containing protein
TraesCS2B03G1388000	IIP5	79	64	IIP5	Similar to ORW1943Ba0077G13.1 protein
TraesCS7B03G0075400	LOC123157469	76	64		uncharacterized protein LOC123157469
TraesCS5A03G1280400	LOC123106165	80	63		metacaspase-1-like
TraesCS2B03G1134900	TraesCS2B03G1134900	78	62
TraesCS2B03G1267800	LOC123046858	76	62		uncharacterized protein LOC123046858
TraesCS3B03G1208500	TraesCS3B03G1208500	77	62
TraesCS7D03G0809500	TraesCS7D03G0809500	85	62
TraesCS1A03G1003700	WTF1	76	61	WTF1	protein WHAT'S THIS FACTOR 1 homolog, chloroplastic-like
TraesCS3D03G0584900	LOC123078819	75	60		putative Peroxidase 48 isoform X1
TraesCS7A03G0759000	OsUCL24	76	60	OsUCL24	Cupredoxin domain containing protein
TraesCS7A03G1057000	LOC123148825	71	59		uncharacterized protein LOC123148825 isoform X1
TraesCS7D03G0189100	LOC123169847	72	59		dormancy-associated protein homolog 3-like
TraesCS1A03G0272800	LOC123039912	70	58		protein NETWORKED 4B-like
TraesCS1B03G0772800	LOC123134284	69	58		dnaJ protein homolog 1-like
TraesCS3B03G0716600	OsSTA30	71	58	OsSTA30	alpha-amylase 3, chloroplastic-like isoform X1
TraesCS3A03G0589100	TraesCS3A03G0589100	71	57
TraesCS7A03G0222300	AAE18	70	57	AAE18	Similar to AAE18 (ACYL-ACTIVATING ENZYME 18); catalytic/ ligase
TraesCS7A03G0822800	OsDJ-1D	69	57	OsDJ-1D	protein DJ-1 homolog C-like
TraesCS7A03G1031700	LOC123148716	70	57		Similar to cDNA clone:J023083M02, full insert sequence
TraesCS4A03G0621000	LOC123086829	74	56		protein OSB1, mitochondrial-like
TraesCS5A03G0113700	OsGRX4	68	56	OsGRX4	glutaredoxin-C1-like
TraesCS5D03G0163800	LOC123124346	82	56		pathogen-related protein-like
TraesCS6D03G0306800	OsPP2C11	68	56	OsPP2C11	probable protein phosphatase 2C 11 isoform X1
TraesCS7A03G1336800	CATB	64	56	CATB	Catalase isozyme B (EC 1.11.1.6) (CAT-B)
TraesCS3B03G0669100	UPM1	74	55	UPM1	S-adenosyl-L-methionine-dependent uroporphyrinogen III methyltransferase, chloroplastic-like
TraesCS1B03G0325000	HIPP35	63	54	HIPP35	heavy metal-associated isoprenylated plant protein 35-like
TraesCS3D03G0675000	LOC123079210	69	54		la-related protein 6A-like
TraesCS5A03G0424100	LOC123103232	63	54		protein DWARF 53-like
TraesCS5A03G1220100	LOC123108408	73	54		uncharacterized protein LOC123108408
TraesCS5D03G0245800	LOC123119786	66	54		2-alkenal reductase (NADP(+)-dependent)-like
TraesCS6B03G0722300	LOC123134220	64	54		Octicosapeptide/Phox/Bem1p domain containing protein
TraesCS5B03G0189300	TraesCS5B03G0189300	62	53
TraesCS1B03G1275100	LOC123149930	63	52		E3 ubiquitin-protein ligase RNF14-like
TraesCS3D03G0582800	OsSTA30	65	52	AMY3	Alpha-amylase 3, chloroplastic [Source:UniProtKB/Swiss-Prot;Acc:Q94A41]
TraesCS5D03G0852400	LOC123122680	65	52		Tetratricopeptide-like helical domain containing protein
TraesCS1A03G0782200	TraesCS1A03G0782200	65	51
TraesCS4B03G0587700	LOC123092657	63	51		uncharacterized protein LOC123092657
TraesCS4B03G0715100	LOC123093177	66	51		uncharacterized protein LOC123093177 isoform X1
TraesCS5D03G0221900	LOC123119688	61	50		factor of DNA methylation 2-like
TraesCS5D03G0723700	UGE1	59	50	UGE3	UDP-glucose 4-epimerase 3-like
TraesCS3B03G1106800	LOC123071866	60	49		BTB/POZ and TAZ domain-containing protein 1-like
TraesCS4A03G0648700	TraesCS4A03G0648700	61	49		Similar to H1flk (Fragment)
TraesCS7D03G1105700	TraesCS7D03G1105700	57	49
TraesCS1A03G0764100	OsFbox265	57	48	OsFbox265	F-box protein At5g46170-like
TraesCS1D03G0235300	TraesCS1D03G0235300	57	48
TraesCS1D03G1020400	LOC123178815	57	48		probable esterase D14L
TraesCS4B03G0961100	LOC123093946	62	47		2-oxoglutarate-dependent dioxygenase 11-like isoform X2
TraesCS1D03G0646300	LOC123182118	52	46		Similar to ATP binding protein
TraesCS2B03G0886100	GGT1	58	46	GGT1	Glutathione hydrolase 1 [Source:UniProtKB/Swiss-Prot;Acc:Q8VYW6]
TraesCS1D03G0547500	LOC123181670	69	45		palmitoyl-protein thioesterase 1-like isoform X1
TraesCS2B03G1047500	LOC123041739	59	45		uncharacterized protein LOC123041739
TraesCS4A03G0083100	LOC123084952	58	45		Alpha/beta-Hydrolases superfamily protein
TraesCS4D03G0022700	OsTBP2	57	45	TBP2	TATA-box-binding protein 2 isoform X1
TraesCS5B03G0328600	LOC123111064	57	45		aldehyde dehydrogenase family 3 member H1-like
TraesCS1D03G0848000	TraesCS1D03G0848000	52	44
TraesCS4D03G0454600	SOQ1	57	44	SOQ1	protein SUPPRESSOR OF QUENCHING 1, chloroplastic-like isoform X2
TraesCS3D03G0714500	SPHK2	54	43	SPHK2	sphingosine kinase 2-like
TraesCS4D03G0030100	PKP1	55	43	PKP1	plastidial pyruvate kinase 1, chloroplastic-like
TraesCS4D03G0088000	LOC123095891	51	43		uncharacterized protein LOC123095891
TraesCS4D03G0267500	RCA	55	43	RCA	ribulose bisphosphate carboxylase/oxygenase activase B, chloroplastic-like
TraesCS7A03G0868600	LOC123151678	52	43		Similar to F20B17.20
TraesCS7B03G0780600	LOC123159595	49	43		FCS-Like Zinc finger 5-like
TraesCS1A03G0887900	LOC123065486	51	42		uncharacterized protein At1g15400-like
TraesCS2A03G0378700	DRD1	52	42	DRD1	DEAD-like helicase, N-terminal domain containing protein
TraesCS3A03G0320700	CYP710A1	51	42	CYP710A8-A	cytochrome P450 710A1-like
TraesCS4D03G0698000	LOC123098656	53	42		uncharacterized protein LOC123098656
TraesCS5B03G0391600	LOC123111311	54	42		homoserine dehydrogenase-like
TraesCS1A03G0608300	OsPR2	51	41	OsPR2	lichenase-2-like
TraesCS2D03G0396200	DRD1	53	41	DRD1	DEAD-like helicase, N-terminal domain containing protein
TraesCS5B03G0835100	OsPIP2	49	41	OsPIP2	probable aquaporin PIP2-7
TraesCS2A03G0930300	LOC123189898	54	40		beta-glucosidase 16-like
TraesCS5A03G0225900	OsLHT4A	48	39	AATL1	Lysine histidine transporter-like 8
TraesCS7D03G1007000	TraesCS7D03G1007000	46	39
TraesCS5D03G0344400	OsENA1	46	38	OsENA1	Major facilitator superfamily protein
TraesCS4D03G0060200	LOC123095803	47	37		protein ETHYLENE-INSENSITIVE 2-like isoform X2
TraesCS5D03G0091400	TraesCS5D03G0091400	46	37
TraesCS1B03G0796800	LOC123093372	45	36		solute carrier family 35 member F2-like
TraesCS2D03G0889900	LOC123049707	49	36		uncharacterized protein LOC123049707
TraesCS2A03G1181400	SULTR3	42	35	SULTR3	probable sulfate transporter 3.3
TraesCS5A03G1018800	Os_F0772	42	35	Os_F0772	uncharacterized protein LOC123115093
TraesCS7D03G0984900	LOC123167909	45	35		Similar to cDNA clone:J023083M02, full insert sequence
TraesCS2D03G0705800	LOC123053367	37	34		glycolipid transfer protein 3-like
TraesCS7A03G1223100	OsRpo	39	34	OsRpo	DNA-directed RNA polymerase 3B, chloroplastic-like
TraesCS2D03G0019400	CP5	41	33	CP5	Polyketide cyclase/dehydrase and lipid transport superfamily protein [Source:UniProtKB/TrEMBL;Acc:Q9XIR9]
TraesCS3D03G0543900	UPM1	43	33	UPM1	S-adenosyl-L-methionine-dependent uroporphyrinogen III methyltransferase, chloroplastic-like
TraesCS6B03G0496200	OsDjC17	45	33	OsDjC17	chaperone protein dnaJ 6-like
TraesCS7D03G0759300	AK1	43	33	AK1	adenylate kinase, chloroplastic-like
TraesCS2D03G0686300	LOC123053270	35	32		succinate dehydrogenase subunit 5, mitochondrial-like
TraesCS1A03G1039400	emb2742	39	31		CTP synthase-like isoform X2
TraesCS1B03G0649800	LOC123127795	35	30		protein NRT1/ PTR FAMILY 6.3-like
TraesCS2B03G1298000	LOC123046941	40	30		fructan 6-exohydrolase-like isoform X1
TraesCS3D03G0034200	OsABCG1	41	30	OsABCG1	uncharacterized protein LOC123073663
TraesCS3D03G0642600	TraesCS3D03G0642600	38	30
TraesCS7B03G0336700	LOC123156678	36	30		65-kDa microtubule-associated protein 1-like
TraesCS2D03G0467800	BAM5	41	29	BAM5	beta-amylase
TraesCS3B03G1163000	OsTCP6	37	29	OsTCP6	transcription factor TCP20-like
TraesCS3D03G0811100	LOC123079836	37	29		acidic endochitinase-like
TraesCS3D03G1047100	TraesCS3D03G1047100	35	29
TraesCS6B03G0824200	OsALDH3E2	38	29	OsALDH3E2	aldehyde dehydrogenase family 3 member F1-like
TraesCS3A03G0637300	OsSTA30	37	28	AMY3	alpha-amylase 3, chloroplastic-like
TraesCS6B03G1137500	BBD2	38	28	BBD2	Bifunctional nuclease 2
TraesCS2A03G1150000	LOC123190639	36	26		uncharacterized protein LOC123190639
TraesCS5D03G1087800	LOC123123515	35	26		alpha-mannosidase At3g26720-like
TraesCS2A03G0345300	LOC123184990	35	25		uncharacterized protein LOC123184990
TraesCS2D03G0740600	GGT1	35	25	GGT1	glutathione hydrolase 1-like
TraesCS3A03G0606100	LOC123061610	33	25		GDSL esterase/lipase At1g28600-like
TraesCS3B03G1135800	CYP99A2	30	25	CYP99A2	cytochrome P450 CYP99A1-like
TraesCS5D03G0136400	OsGRX4	35	25	OsGRX4	glutaredoxin-C1-like
TraesCS5D03G0902000	LOC123122895	33	25		E3 ubiquitin-protein ligase EL5-like
TraesCS6D03G0809600	LOC123142051	29	25		uncharacterized protein LOC123142051
TraesCS3B03G0791600	LOC123070627	30	24		dolichyl-diphosphooligosaccharide--protein glycosyltransferase subunit STT3A-like
TraesCS5D03G0838200	LOC123122641	27	24		mitochondrial amidoxime reducing component 2-like
TraesCS1A03G0654300	LOC123055288	32	23		uncharacterized protein LOC123055288 isoform X1
TraesCS1D03G0668000	LOC123182198	29	22		Tetratricopeptide-like helical domain containing protein
TraesCS3D03G0189000	LOC123077295	31	22		leucine-rich repeat receptor protein kinase HPCA1-like
TraesCS3D03G0745500	TraesCS3D03G0745500	27	22
TraesCS3D03G1047000	TraesCS3D03G1047000	30	22
TraesCS7A03G1236900	LOC123149475	28	22		putative aldehyde oxidase-like protein isoform X1
TraesCS2D03G0983300	TraesCS2D03G0983300	27	21
TraesCS2D03G1091000	RLI1	29	21	RLI1	HTH_MYB-like transcription factor, Positive regulation of leaf inclinatio
TraesCS3B03G0666300	OsWRKY12	25	20	OsWRKY12	Similar to WRKY transcription factor 12
TraesCS3D03G0059500	LOC123076874	25	20		uncharacterized lipoprotein syc1174_c-like
TraesCS3D03G0974200	TraesCS3D03G0974200	26	20
TraesCS4A03G0200700	LOC123085446	25	20		E3 ubiquitin-protein ligase XB3-like
TraesCS4D03G0762900	LOC123098910	25	20		transcription factor BHLH3-like
TraesCS4D03G0810100	LOC123099058	23	20		F-box protein PP2-A13-like
TraesCS5B03G0125400	OsGRX4	29	20	OsGRX4	glutaredoxin-C1-like
TraesCS2A03G0953400	LOC123189991	24	19		uncharacterized protein LOC123189991
TraesCS4A03G0647600	OsCBL3	26	19	CBL3	calcineurin B-like protein 3
TraesCS4B03G0154400	OsCBL3	26	19	CBL3	calcineurin B-like protein 3 isoform X1
TraesCS1D03G1040500	TraesCS1D03G1040500	24	18
TraesCS3A03G1037900	BGLU11	29	18	BGLU11	beta-glucosidase 5-like isoform X2
TraesCS7B03G0419500	LOC123162011	25	18		E3 ubiquitin-protein ligase RNF4-like
TraesCS7B03G0455800	CYP78A9	24	18	CYP78A9	cytochrome P450 78A9-like
TraesCS1A03G0334100	TraesCS1A03G0334100	23	17
TraesCS2A03G0087200	LOC123187119	22	17		serine carboxypeptidase-like 11 isoform X1
TraesCS2A03G0832800	TraesCS2A03G0832800	21	17
TraesCS4B03G0291800	TraesCS4B03G0291800	26	17
TraesCS5D03G0552200	cab	24	17	LHCA4	Similar to LHC I type IV chlorophyll binding protein (Fragment)
TraesCS2D03G0868600	TraesCS2D03G0868600	21	16
TraesCS2D03G1118600	OsFPPS3	19	16	OsFPPS3	farnesyl pyrophosphate synthase-like isoform X2
TraesCS6D03G0282300	LOC123136457	23	16		Zinc finger, C2H2-type domain containing protein
TraesCS3A03G0700600	LOC123061965	20	15		uncharacterized protein LOC123061965
TraesCS3B03G0976700	LOC123071371	22	15		ankyrin repeat-containing protein At5g02620-like isoform X2
TraesCS3D03G1135100	LOC123075810	21	15		agamous-like MADS-box protein AGL61
TraesCS3A03G0209700	LOC123060277	20	14		leucine-rich repeat receptor protein kinase HPCA1-like
TraesCS3D03G0943500	LOC123075282	23	14		uncharacterized WD repeat-containing protein C17D11.16-like
TraesCS5B03G1139400	LOC123117320	19	14		uncharacterized protein LOC123117320
TraesCS2A03G0300400	XK-2	17	12	XK-2	xylulose kinase 2-like
TraesCS4D03G0013400	LOC123095588	16	12		receptor-like protein EIX2
TraesCS4D03G0249600	OsARAF3	19	12	ASD1	alpha-L-arabinofuranosidase 1-like
TraesCS3A03G1018800	OsMC1	13	10	OsMC1	Peptidase C14, caspase catalytic domain containing protein
TraesCS3B03G0008000	LOC123068164	14	10		subtilisin-like protease SBT3.5
TraesCS3B03G1076600	LOC123066082	14	10		uncharacterized protein LOC123066082
TraesCS7A03G1350900	LOC123147230	13	10		probable E3 ubiquitin-protein ligase ATL44
TraesCS1B03G1073500	LOC123097816	16	9		uncharacterized protein LOC123097816
TraesCS2D03G0318700	LOC123051903	14	9	XK-2	xylulose kinase 2-like
TraesCS3A03G1146800	LOC123063462	15	9		cysteine-rich and transmembrane domain-containing protein WIH1-like
TraesCS3B03G0993600	TraesCS3B03G0993600	14	9
TraesCS1B03G0812500	TraesCS1B03G0812500	9	8
TraesCS3A03G1013600	OsTCP6	8	6	OsTCP6	Similar to Auxin-induced basic helix-loop-helix transcription factor
TraesCS2D03G1266500	TraesCS2D03G1266500	8	5
TraesCS3B03G0914200	OsbZIP07	8	5	OsbZIP07	Similar to Transcription factor (Fragment)
TraesCS3B03G0918900	OsTUB4	12	5	OsTUB4	tubulin beta chain
TraesCS3B03G1033800	LOC123071614	6	5		RNA-binding protein 24-B-like isoform X1
TraesCS5D03G0429100	LOC123120974	6	5		RCC1 domain-containing protein RUG3, mitochondrial-like
TraesCS7B03G1219100	LOC123156147	5	5		putative disease resistance protein RGA4
TraesCS1B03G0359900	TraesCS1B03G0359900	6	4		Protein of unknown function DUF250 domain containing protein
TraesCS2B03G0967600	OsMFS2	4	4	OsMFS2	protein NUCLEAR FUSION DEFECTIVE 4-like
TraesCS5B03G1018900	LOC123113474	5	4		Similar to predicted protein
TraesCS5D03G0395700	LOC123120557	6	4		Aminotransferase, class IV family protein
TraesCS7B03G0591100	ROX2	4	4	ROX2	ribosomal RNA small subunit methyltransferase B-like
TraesCS1A03G1022200	RL2	8	3	RL2	Homeodomain-like containing protein
TraesCS4B03G0653000	LOC123092911	3	3	PMM-B2	phosphomannomutase-like
TraesCS5A03G0397400	LOC123103125	5	3		uncharacterized protein LOC123103125
TraesCS6D03G0607700	TraesCS6D03G0607700	4	3		Methyltransferase type 11 domain containing protein
TraesCS2A03G0918100	LOC123189861	3	2		Similar to OSIGBa0153E02-OSIGBa0093I20.5 protein

## Sheet: PG(34_4)_edges
fromNode	toNode	weight
TraesCS1A03G0222200	PG(34:4)	0.323983
TraesCS1A03G0272800	PG(34:4)	0.335598
TraesCS1A03G0308600	PG(34:4)	0.326375
TraesCS1A03G0334100	PG(34:4)	0.327664
TraesCS1A03G0479500	PG(34:4)	0.337369
TraesCS1A03G0608300	PG(34:4)	0.31345
TraesCS1A03G0634400	PG(34:4)	0.36772
TraesCS1A03G0654300	PG(34:4)	0.306123
TraesCS1A03G0764100	PG(34:4)	0.318109
TraesCS1A03G0782200	PG(34:4)	0.327932
TraesCS1A03G0788400	PG(34:4)	0.344449
TraesCS1A03G0847000	PG(34:4)	0.341047
TraesCS1A03G0887900	PG(34:4)	0.30497
TraesCS1A03G0968400	PG(34:4)	0.321501
TraesCS1A03G1003700	PG(34:4)	0.302994
TraesCS1A03G1022200	PG(34:4)	0.300872
TraesCS1A03G1039400	PG(34:4)	0.341309
TraesCS1A03G1060100	PG(34:4)	0.361093
TraesCS1A03G1079100	PG(34:4)	0.357679
TraesCS1B03G0192900	PG(34:4)	0.343856
TraesCS1B03G0325000	PG(34:4)	0.309747
TraesCS1B03G0359900	PG(34:4)	0.289458
TraesCS1B03G0591800	PG(34:4)	0.310974
TraesCS1B03G0649800	PG(34:4)	0.317694
TraesCS1B03G0693100	PG(34:4)	0.378171
TraesCS1B03G0723500	PG(34:4)	0.360661
TraesCS1B03G0772800	PG(34:4)	0.305907
TraesCS1B03G0796800	PG(34:4)	0.303815
TraesCS1B03G0812500	PG(34:4)	0.298169
TraesCS1B03G1065800	PG(34:4)	0.320577
TraesCS1B03G1072800	PG(34:4)	0.314836
TraesCS1B03G1073500	PG(34:4)	0.306845
TraesCS1B03G1184200	PG(34:4)	0.312973
TraesCS1B03G1275100	PG(34:4)	0.351015
TraesCS1D03G0235300	PG(34:4)	0.332646
TraesCS1D03G0373000	PG(34:4)	0.317423
TraesCS1D03G0452900	PG(34:4)	0.302977
TraesCS1D03G0547500	PG(34:4)	0.321257
TraesCS1D03G0594600	PG(34:4)	0.342602
TraesCS1D03G0602900	PG(34:4)	0.361004
TraesCS1D03G0646300	PG(34:4)	0.313874
TraesCS1D03G0668000	PG(34:4)	0.312651
TraesCS1D03G0777800	PG(34:4)	0.341451
TraesCS1D03G0790100	PG(34:4)	0.360219
TraesCS1D03G0814800	PG(34:4)	0.350322
TraesCS1D03G0848000	PG(34:4)	0.291458
TraesCS1D03G1020400	PG(34:4)	0.297965
TraesCS1D03G1040500	PG(34:4)	0.324663
TraesCS2A03G0087200	PG(34:4)	0.317337
TraesCS2A03G0132800	PG(34:4)	0.372424
TraesCS2A03G0239600	PG(34:4)	0.349202
TraesCS2A03G0300400	PG(34:4)	0.315488
TraesCS2A03G0337700	PG(34:4)	0.361228
TraesCS2A03G0345300	PG(34:4)	0.301605
TraesCS2A03G0345600	PG(34:4)	0.330815
TraesCS2A03G0378700	PG(34:4)	0.329033
TraesCS2A03G0608600	PG(34:4)	0.339346
TraesCS2A03G0649900	PG(34:4)	0.332731
TraesCS2A03G0832800	PG(34:4)	0.318597
TraesCS2A03G0873900	PG(34:4)	0.365815
TraesCS2A03G0910800	PG(34:4)	0.353485
TraesCS2A03G0918100	PG(34:4)	0.291818
TraesCS2A03G0930300	PG(34:4)	0.329416
TraesCS2A03G0953400	PG(34:4)	0.296781
TraesCS2A03G1000800	PG(34:4)	0.352693
TraesCS2A03G1150000	PG(34:4)	0.31772
TraesCS2A03G1166300	PG(34:4)	0.334371
TraesCS2A03G1181400	PG(34:4)	0.311285
TraesCS2A03G1214500	PG(34:4)	0.320074
TraesCS2A03G1311600	PG(34:4)	0.313258
TraesCS2A03G1334600	PG(34:4)	0.324121
TraesCS2B03G0027300	PG(34:4)	0.305358
TraesCS2B03G0463700	PG(34:4)	0.371615
TraesCS2B03G0503500	PG(34:4)	0.352769
TraesCS2B03G0541200	PG(34:4)	0.299878
TraesCS2B03G0698600	PG(34:4)	0.324503
TraesCS2B03G0886100	PG(34:4)	0.333488
TraesCS2B03G0959500	PG(34:4)	0.371181
TraesCS2B03G0967600	PG(34:4)	0.289784
TraesCS2B03G1047500	PG(34:4)	0.334542
TraesCS2B03G1134900	PG(34:4)	0.307856
TraesCS2B03G1186800	PG(34:4)	0.382
TraesCS2B03G1267800	PG(34:4)	0.296999
TraesCS2B03G1298000	PG(34:4)	0.320831
TraesCS2B03G1322200	PG(34:4)	0.328154
TraesCS2B03G1388000	PG(34:4)	0.355117
TraesCS2D03G0019400	PG(34:4)	0.338258
TraesCS2D03G0196100	PG(34:4)	0.360188
TraesCS2D03G0240900	PG(34:4)	0.343484
TraesCS2D03G0248000	PG(34:4)	0.309161
TraesCS2D03G0318700	PG(34:4)	0.310863
TraesCS2D03G0355800	PG(34:4)	0.297762
TraesCS2D03G0361400	PG(34:4)	0.359827
TraesCS2D03G0396200	PG(34:4)	0.32804
TraesCS2D03G0467500	PG(34:4)	0.329679
TraesCS2D03G0467800	PG(34:4)	0.322956
TraesCS2D03G0524400	PG(34:4)	0.312758
TraesCS2D03G0582100	PG(34:4)	0.330763
TraesCS2D03G0619100	PG(34:4)	0.352321
TraesCS2D03G0686300	PG(34:4)	0.310593
TraesCS2D03G0705800	PG(34:4)	0.303702
TraesCS2D03G0740600	PG(34:4)	0.303566
TraesCS2D03G0844800	PG(34:4)	0.325788
TraesCS2D03G0868600	PG(34:4)	0.312441
TraesCS2D03G0889900	PG(34:4)	0.34108
TraesCS2D03G0983300	PG(34:4)	0.305717
TraesCS2D03G1002600	PG(34:4)	0.358942
TraesCS2D03G1091000	PG(34:4)	0.302765
TraesCS2D03G1099200	PG(34:4)	0.32173
TraesCS2D03G1118600	PG(34:4)	0.30957
TraesCS2D03G1134400	PG(34:4)	0.342302
TraesCS2D03G1170700	PG(34:4)	0.341287
TraesCS2D03G1266500	PG(34:4)	0.302387
TraesCS2D03G1277600	PG(34:4)	0.352217
TraesCS3A03G0053400	PG(34:4)	0.312187
TraesCS3A03G0184200	PG(34:4)	0.29265
TraesCS3A03G0209200	PG(34:4)	0.313769
TraesCS3A03G0209700	PG(34:4)	0.32884
TraesCS3A03G0219400	PG(34:4)	0.350811
TraesCS3A03G0265900	PG(34:4)	0.322428
TraesCS3A03G0320700	PG(34:4)	0.334953
TraesCS3A03G0371900	PG(34:4)	0.337093
TraesCS3A03G0396300	PG(34:4)	0.344213
TraesCS3A03G0589100	PG(34:4)	0.333459
TraesCS3A03G0606100	PG(34:4)	0.318848
TraesCS3A03G0637300	PG(34:4)	0.335846
TraesCS3A03G0694500	PG(34:4)	0.296765
TraesCS3A03G0700600	PG(34:4)	0.299349
TraesCS3A03G0720500	PG(34:4)	0.341731
TraesCS3A03G0754500	PG(34:4)	0.342866
TraesCS3A03G0790100	PG(34:4)	0.293329
TraesCS3A03G0815600	PG(34:4)	0.303545
TraesCS3A03G0943600	PG(34:4)	0.34298
TraesCS3A03G0996200	PG(34:4)	0.338974
TraesCS3A03G1013600	PG(34:4)	0.292669
TraesCS3A03G1018800	PG(34:4)	0.300127
TraesCS3A03G1028300	PG(34:4)	0.347968
TraesCS3A03G1037900	PG(34:4)	0.315286
TraesCS3A03G1082900	PG(34:4)	0.314738
TraesCS3A03G1146800	PG(34:4)	0.314588
TraesCS3A03G1192100	PG(34:4)	0.33916
TraesCS3B03G0008000	PG(34:4)	0.305082
TraesCS3B03G0353200	PG(34:4)	0.350598
TraesCS3B03G0397500	PG(34:4)	0.318942
TraesCS3B03G0616600	PG(34:4)	0.340751
TraesCS3B03G0642900	PG(34:4)	0.382343
TraesCS3B03G0666300	PG(34:4)	0.308098
TraesCS3B03G0669100	PG(34:4)	0.306457
TraesCS3B03G0716600	PG(34:4)	0.357305
TraesCS3B03G0780600	PG(34:4)	0.353341
TraesCS3B03G0791600	PG(34:4)	0.3339
TraesCS3B03G0914200	PG(34:4)	0.304596
TraesCS3B03G0918900	PG(34:4)	0.315335
TraesCS3B03G0976700	PG(34:4)	0.328738
TraesCS3B03G0993600	PG(34:4)	0.302387
TraesCS3B03G1017600	PG(34:4)	0.318532
TraesCS3B03G1028000	PG(34:4)	0.346516
TraesCS3B03G1033800	PG(34:4)	0.290465
TraesCS3B03G1076600	PG(34:4)	0.30614
TraesCS3B03G1106800	PG(34:4)	0.327675
TraesCS3B03G1135800	PG(34:4)	0.298705
TraesCS3B03G1145300	PG(34:4)	0.317884
TraesCS3B03G1163000	PG(34:4)	0.302178
TraesCS3B03G1196000	PG(34:4)	0.338235
TraesCS3B03G1208500	PG(34:4)	0.334386
TraesCS3B03G1211400	PG(34:4)	0.343325
TraesCS3B03G1330400	PG(34:4)	0.293645
TraesCS3D03G0034200	PG(34:4)	0.323028
TraesCS3D03G0059500	PG(34:4)	0.306233
TraesCS3D03G0166700	PG(34:4)	0.335238
TraesCS3D03G0189000	PG(34:4)	0.323505
TraesCS3D03G0529600	PG(34:4)	0.354054
TraesCS3D03G0543900	PG(34:4)	0.289749
TraesCS3D03G0582800	PG(34:4)	0.359619
TraesCS3D03G0584900	PG(34:4)	0.345752
TraesCS3D03G0642600	PG(34:4)	0.331381
TraesCS3D03G0642800	PG(34:4)	0.324674
TraesCS3D03G0675000	PG(34:4)	0.301992
TraesCS3D03G0688500	PG(34:4)	0.383731
TraesCS3D03G0714500	PG(34:4)	0.332053
TraesCS3D03G0745500	PG(34:4)	0.319659
TraesCS3D03G0811100	PG(34:4)	0.302583
TraesCS3D03G0928400	PG(34:4)	0.332909
TraesCS3D03G0943500	PG(34:4)	0.297479
TraesCS3D03G0946400	PG(34:4)	0.339281
TraesCS3D03G0974200	PG(34:4)	0.294197
TraesCS3D03G1047000	PG(34:4)	0.342395
TraesCS3D03G1047100	PG(34:4)	0.337522
TraesCS3D03G1135100	PG(34:4)	0.30796
TraesCS4A03G0002900	PG(34:4)	0.327214
TraesCS4A03G0069900	PG(34:4)	0.351472
TraesCS4A03G0083100	PG(34:4)	0.297771
TraesCS4A03G0170100	PG(34:4)	0.327571
TraesCS4A03G0171400	PG(34:4)	0.377283
TraesCS4A03G0188400	PG(34:4)	0.342663
TraesCS4A03G0200700	PG(34:4)	0.292841
TraesCS4A03G0491700	PG(34:4)	0.322771
TraesCS4A03G0533000	PG(34:4)	0.372696
TraesCS4A03G0560500	PG(34:4)	0.325047
TraesCS4A03G0604400	PG(34:4)	0.304713
TraesCS4A03G0621000	PG(34:4)	0.294795
TraesCS4A03G0647600	PG(34:4)	0.311965
TraesCS4A03G0648700	PG(34:4)	0.337093
TraesCS4A03G0681400	PG(34:4)	0.355088
TraesCS4A03G0744900	PG(34:4)	0.332902
TraesCS4A03G0752500	PG(34:4)	0.358254
TraesCS4A03G0821500	PG(34:4)	0.308582
TraesCS4A03G0963200	PG(34:4)	0.326816
TraesCS4A03G1245300	PG(34:4)	0.322362
TraesCS4B03G0032400	PG(34:4)	0.366178
TraesCS4B03G0080200	PG(34:4)	0.300412
TraesCS4B03G0154400	PG(34:4)	0.315838
TraesCS4B03G0155100	PG(34:4)	0.317788
TraesCS4B03G0291800	PG(34:4)	0.31623
TraesCS4B03G0327300	PG(34:4)	0.315733
TraesCS4B03G0587700	PG(34:4)	0.319124
TraesCS4B03G0653000	PG(34:4)	0.296539
TraesCS4B03G0662400	PG(34:4)	0.320822
TraesCS4B03G0715100	PG(34:4)	0.327378
TraesCS4B03G0923800	PG(34:4)	0.301848
TraesCS4B03G0961100	PG(34:4)	0.311019
TraesCS4D03G0013400	PG(34:4)	0.311318
TraesCS4D03G0022700	PG(34:4)	0.334599
TraesCS4D03G0030100	PG(34:4)	0.342456
TraesCS4D03G0050400	PG(34:4)	0.295219
TraesCS4D03G0060200	PG(34:4)	0.302346
TraesCS4D03G0088000	PG(34:4)	0.3341
TraesCS4D03G0130100	PG(34:4)	0.344272
TraesCS4D03G0156100	PG(34:4)	0.324253
TraesCS4D03G0165900	PG(34:4)	0.303994
TraesCS4D03G0249600	PG(34:4)	0.298051
TraesCS4D03G0267500	PG(34:4)	0.345477
TraesCS4D03G0454600	PG(34:4)	0.335255
TraesCS4D03G0522100	PG(34:4)	0.350046
TraesCS4D03G0534700	PG(34:4)	0.358354
TraesCS4D03G0627100	PG(34:4)	0.356241
TraesCS4D03G0657600	PG(34:4)	0.345195
TraesCS4D03G0698000	PG(34:4)	0.329387
TraesCS4D03G0762900	PG(34:4)	0.311772
TraesCS4D03G0810100	PG(34:4)	0.297973
TraesCS4D03G0833000	PG(34:4)	0.353521
TraesCS4D03G0841400	PG(34:4)	0.324306
TraesCS5A03G0112400	PG(34:4)	0.347438
TraesCS5A03G0113700	PG(34:4)	0.340723
TraesCS5A03G0225900	PG(34:4)	0.292782
TraesCS5A03G0368300	PG(34:4)	0.295355
TraesCS5A03G0397400	PG(34:4)	0.29869
TraesCS5A03G0410400	PG(34:4)	0.327028
TraesCS5A03G0424100	PG(34:4)	0.337101
TraesCS5A03G0471800	PG(34:4)	0.341968
TraesCS5A03G0931300	PG(34:4)	0.360309
TraesCS5A03G1018800	PG(34:4)	0.327271
TraesCS5A03G1140600	PG(34:4)	0.337762
TraesCS5A03G1162700	PG(34:4)	0.352977
TraesCS5A03G1189600	PG(34:4)	0.350082
TraesCS5A03G1220100	PG(34:4)	0.29555
TraesCS5A03G1278000	PG(34:4)	0.29649
TraesCS5A03G1279700	PG(34:4)	0.348904
TraesCS5A03G1280400	PG(34:4)	0.31975
TraesCS5B03G0125400	PG(34:4)	0.30493
TraesCS5B03G0127200	PG(34:4)	0.308007
TraesCS5B03G0189200	PG(34:4)	0.352838
TraesCS5B03G0189300	PG(34:4)	0.30321
TraesCS5B03G0256900	PG(34:4)	0.328036
TraesCS5B03G0328600	PG(34:4)	0.322359
TraesCS5B03G0391600	PG(34:4)	0.336835
TraesCS5B03G0407400	PG(34:4)	0.354893
TraesCS5B03G0509600	PG(34:4)	0.296837
TraesCS5B03G0520000	PG(34:4)	0.303972
TraesCS5B03G0598300	PG(34:4)	0.302962
TraesCS5B03G0798700	PG(34:4)	0.352847
TraesCS5B03G0835100	PG(34:4)	0.297768
TraesCS5B03G0981700	PG(34:4)	0.368786
TraesCS5B03G1018900	PG(34:4)	0.292668
TraesCS5B03G1049400	PG(34:4)	0.361852
TraesCS5B03G1066300	PG(34:4)	0.358198
TraesCS5B03G1139400	PG(34:4)	0.312781
TraesCS5B03G1140700	PG(34:4)	0.341535
TraesCS5B03G1219100	PG(34:4)	0.297588
TraesCS5B03G1355600	PG(34:4)	0.342976
TraesCS5D03G0091400	PG(34:4)	0.320245
TraesCS5D03G0133600	PG(34:4)	0.382344
TraesCS5D03G0136400	PG(34:4)	0.312721
TraesCS5D03G0163800	PG(34:4)	0.296539
TraesCS5D03G0221900	PG(34:4)	0.341325
TraesCS5D03G0245800	PG(34:4)	0.330776
TraesCS5D03G0344400	PG(34:4)	0.312429
TraesCS5D03G0361600	PG(34:4)	0.372852
TraesCS5D03G0395700	PG(34:4)	0.30211
TraesCS5D03G0429100	PG(34:4)	0.296545
TraesCS5D03G0435100	PG(34:4)	0.347745
TraesCS5D03G0444000	PG(34:4)	0.355388
TraesCS5D03G0479000	PG(34:4)	0.305208
TraesCS5D03G0500400	PG(34:4)	0.341361
TraesCS5D03G0552200	PG(34:4)	0.291211
TraesCS5D03G0723700	PG(34:4)	0.330915
TraesCS5D03G0838200	PG(34:4)	0.303071
TraesCS5D03G0852400	PG(34:4)	0.342818
TraesCS5D03G0878400	PG(34:4)	0.348561
TraesCS5D03G0890100	PG(34:4)	0.364002
TraesCS5D03G0893700	PG(34:4)	0.334196
TraesCS5D03G0902000	PG(34:4)	0.290909
TraesCS5D03G0979300	PG(34:4)	0.323465
TraesCS5D03G1087800	PG(34:4)	0.330718
TraesCS5D03G1125100	PG(34:4)	0.311582
TraesCS6B03G0179100	PG(34:4)	0.321463
TraesCS6B03G0199900	PG(34:4)	0.31203
TraesCS6B03G0234700	PG(34:4)	0.347286
TraesCS6B03G0496200	PG(34:4)	0.334056
TraesCS6B03G0722300	PG(34:4)	0.329997
TraesCS6B03G0824200	PG(34:4)	0.322953
TraesCS6B03G0929100	PG(34:4)	0.306137
TraesCS6B03G1088900	PG(34:4)	0.346256
TraesCS6B03G1137500	PG(34:4)	0.326895
TraesCS6D03G0043600	PG(34:4)	0.349602
TraesCS6D03G0282300	PG(34:4)	0.326568
TraesCS6D03G0306800	PG(34:4)	0.33265
TraesCS6D03G0607700	PG(34:4)	0.292019
TraesCS6D03G0809600	PG(34:4)	0.308028
TraesCS7A03G0209400	PG(34:4)	0.333089
TraesCS7A03G0222300	PG(34:4)	0.337385
TraesCS7A03G0243900	PG(34:4)	0.355767
TraesCS7A03G0292200	PG(34:4)	0.34981
TraesCS7A03G0373600	PG(34:4)	0.351574
TraesCS7A03G0492900	PG(34:4)	0.367514
TraesCS7A03G0539000	PG(34:4)	0.308148
TraesCS7A03G0548700	PG(34:4)	0.355874
TraesCS7A03G0610900	PG(34:4)	0.308704
TraesCS7A03G0679300	PG(34:4)	0.301054
TraesCS7A03G0759000	PG(34:4)	0.357548
TraesCS7A03G0822800	PG(34:4)	0.349006
TraesCS7A03G0824800	PG(34:4)	0.319804
TraesCS7A03G0868600	PG(34:4)	0.332982
TraesCS7A03G1031700	PG(34:4)	0.33761
TraesCS7A03G1057000	PG(34:4)	0.300073
TraesCS7A03G1134500	PG(34:4)	0.326639
TraesCS7A03G1223100	PG(34:4)	0.31032
TraesCS7A03G1236900	PG(34:4)	0.319189
TraesCS7A03G1267400	PG(34:4)	0.342165
TraesCS7A03G1336800	PG(34:4)	0.306125
TraesCS7A03G1350900	PG(34:4)	0.290684
TraesCS7B03G0003100	PG(34:4)	0.320845
TraesCS7B03G0053800	PG(34:4)	0.300154
TraesCS7B03G0075400	PG(34:4)	0.308856
TraesCS7B03G0170900	PG(34:4)	0.352668
TraesCS7B03G0306700	PG(34:4)	0.35293
TraesCS7B03G0306900	PG(34:4)	0.320213
TraesCS7B03G0336700	PG(34:4)	0.332323
TraesCS7B03G0393800	PG(34:4)	0.302752
TraesCS7B03G0419500	PG(34:4)	0.307213
TraesCS7B03G0455800	PG(34:4)	0.30911
TraesCS7B03G0591100	PG(34:4)	0.29615
TraesCS7B03G0698500	PG(34:4)	0.366036
TraesCS7B03G0780600	PG(34:4)	0.291819
TraesCS7B03G1087800	PG(34:4)	0.360919
TraesCS7B03G1178300	PG(34:4)	0.333055
TraesCS7B03G1219100	PG(34:4)	0.309138
TraesCS7D03G0176900	PG(34:4)	0.335902
TraesCS7D03G0188900	PG(34:4)	0.35403
TraesCS7D03G0189100	PG(34:4)	0.341301
TraesCS7D03G0357800	PG(34:4)	0.352582
TraesCS7D03G0551500	PG(34:4)	0.293037
TraesCS7D03G0611800	PG(34:4)	0.34184
TraesCS7D03G0759300	PG(34:4)	0.326286
TraesCS7D03G0809500	PG(34:4)	0.300576
TraesCS7D03G0824300	PG(34:4)	0.358114
TraesCS7D03G0984900	PG(34:4)	0.32363
TraesCS7D03G1007000	PG(34:4)	0.308387
TraesCS7D03G1052900	PG(34:4)	0.308005
TraesCS7D03G1105700	PG(34:4)	0.322073
TraesCS7D03G1271400	PG(34:4)	0.367176
TraesCS1A03G0222200	TraesCS1A03G0479500	0.359113
TraesCS1A03G0222200	TraesCS1A03G0634400	0.366078
TraesCS1A03G0222200	TraesCS1A03G0847000	0.335502
TraesCS1A03G0222200	TraesCS1A03G0968400	0.294515
TraesCS1A03G0222200	TraesCS1A03G1060100	0.337183
TraesCS1A03G0222200	TraesCS1A03G1079100	0.312637
TraesCS1A03G0222200	TraesCS1B03G0693100	0.290786
TraesCS1A03G0222200	TraesCS1B03G0723500	0.357563
TraesCS1A03G0222200	TraesCS1D03G0373000	0.343463
TraesCS1A03G0222200	TraesCS1D03G0452900	0.298682
TraesCS1A03G0222200	TraesCS1D03G0790100	0.322867
TraesCS1A03G0222200	TraesCS2A03G0132800	0.334921
TraesCS1A03G0222200	TraesCS2A03G0239600	0.340674
TraesCS1A03G0222200	TraesCS2A03G0345600	0.302369
TraesCS1A03G0222200	TraesCS2A03G1000800	0.293859
TraesCS1A03G0222200	TraesCS2A03G1214500	0.297009
TraesCS1A03G0222200	TraesCS2A03G1311600	0.30166
TraesCS1A03G0222200	TraesCS2B03G0698600	0.301128
TraesCS1A03G0222200	TraesCS2B03G0959500	0.340988
TraesCS1A03G0222200	TraesCS2B03G1186800	0.345977
TraesCS1A03G0222200	TraesCS2D03G0361400	0.291286
TraesCS1A03G0222200	TraesCS2D03G0467500	0.293688
TraesCS1A03G0222200	TraesCS2D03G1002600	0.317389
TraesCS1A03G0222200	TraesCS2D03G1277600	0.349373
TraesCS1A03G0222200	TraesCS3A03G0209200	0.337133
TraesCS1A03G0222200	TraesCS3A03G0265900	0.290582
TraesCS1A03G0222200	TraesCS3A03G0371900	0.304256
TraesCS1A03G0222200	TraesCS3B03G0616600	0.297051
TraesCS1A03G0222200	TraesCS3B03G0642900	0.350417
TraesCS1A03G0222200	TraesCS3B03G1028000	0.353649
TraesCS1A03G0222200	TraesCS3B03G1330400	0.317803
TraesCS1A03G0222200	TraesCS3D03G0166700	0.315314
TraesCS1A03G0222200	TraesCS3D03G0688500	0.365973
TraesCS1A03G0222200	TraesCS4A03G0171400	0.351426
TraesCS1A03G0222200	TraesCS4A03G0188400	0.290471
TraesCS1A03G0222200	TraesCS4A03G0604400	0.312311
TraesCS1A03G0222200	TraesCS4A03G0681400	0.321776
TraesCS1A03G0222200	TraesCS4A03G0752500	0.298187
TraesCS1A03G0222200	TraesCS4A03G1245300	0.333853
TraesCS1A03G0222200	TraesCS4B03G0080200	0.296688
TraesCS1A03G0222200	TraesCS4B03G0155100	0.308393
TraesCS1A03G0222200	TraesCS4B03G0662400	0.312896
TraesCS1A03G0222200	TraesCS4D03G0050400	0.315106
TraesCS1A03G0222200	TraesCS4D03G0165900	0.316186
TraesCS1A03G0222200	TraesCS4D03G0522100	0.320572
TraesCS1A03G0222200	TraesCS4D03G0534700	0.342853
TraesCS1A03G0222200	TraesCS4D03G0657600	0.3548
TraesCS1A03G0222200	TraesCS5A03G0410400	0.301273
TraesCS1A03G0222200	TraesCS5A03G1140600	0.300478
TraesCS1A03G0222200	TraesCS5A03G1162700	0.333265
TraesCS1A03G0222200	TraesCS5B03G0127200	0.308083
TraesCS1A03G0222200	TraesCS5B03G0189200	0.331335
TraesCS1A03G0222200	TraesCS5B03G0509600	0.304224
TraesCS1A03G0222200	TraesCS5B03G0798700	0.309888
TraesCS1A03G0222200	TraesCS5B03G0981700	0.316189
TraesCS1A03G0222200	TraesCS5D03G0133600	0.365951
TraesCS1A03G0222200	TraesCS5D03G1125100	0.324355
TraesCS1A03G0222200	TraesCS6B03G0199900	0.332447
TraesCS1A03G0222200	TraesCS6D03G0043600	0.308069
TraesCS1A03G0222200	TraesCS7A03G0539000	0.298006
TraesCS1A03G0222200	TraesCS7B03G0003100	0.320347
TraesCS1A03G0222200	TraesCS7B03G1178300	0.322802
TraesCS1A03G0222200	TraesCS7D03G0357800	0.334081
TraesCS1A03G0222200	TraesCS7D03G1271400	0.291527
TraesCS1A03G0272800	TraesCS1A03G0308600	0.318235
TraesCS1A03G0272800	TraesCS1A03G0479500	0.299788
TraesCS1A03G0272800	TraesCS1A03G0634400	0.353088
TraesCS1A03G0272800	TraesCS1A03G0847000	0.321685
TraesCS1A03G0272800	TraesCS1A03G0968400	0.306061
TraesCS1A03G0272800	TraesCS1B03G0693100	0.314393
TraesCS1A03G0272800	TraesCS1B03G0723500	0.317158
TraesCS1A03G0272800	TraesCS1D03G0452900	0.289395
TraesCS1A03G0272800	TraesCS1D03G0594600	0.313981
TraesCS1A03G0272800	TraesCS1D03G0602900	0.322757
TraesCS1A03G0272800	TraesCS1D03G0777800	0.317229
TraesCS1A03G0272800	TraesCS1D03G0790100	0.339464
TraesCS1A03G0272800	TraesCS2A03G0132800	0.320388
TraesCS1A03G0272800	TraesCS2A03G0239600	0.351897
TraesCS1A03G0272800	TraesCS2A03G0337700	0.297392
TraesCS1A03G0272800	TraesCS2A03G0345600	0.302471
TraesCS1A03G0272800	TraesCS2A03G1000800	0.342977
TraesCS1A03G0272800	TraesCS2A03G1214500	0.318372
TraesCS1A03G0272800	TraesCS2B03G0463700	0.331594
TraesCS1A03G0272800	TraesCS2B03G0959500	0.294471
TraesCS1A03G0272800	TraesCS2B03G1186800	0.324741
TraesCS1A03G0272800	TraesCS2D03G0196100	0.311839
TraesCS1A03G0272800	TraesCS2D03G0248000	0.327356
TraesCS1A03G0272800	TraesCS2D03G0361400	0.31091
TraesCS1A03G0272800	TraesCS3A03G0219400	0.303531
TraesCS1A03G0272800	TraesCS3A03G0396300	0.296807
TraesCS1A03G0272800	TraesCS3A03G0996200	0.303601
TraesCS1A03G0272800	TraesCS3B03G0642900	0.291984
TraesCS1A03G0272800	TraesCS3D03G0688500	0.3472
TraesCS1A03G0272800	TraesCS4A03G0171400	0.337291
TraesCS1A03G0272800	TraesCS4A03G0491700	0.29247
TraesCS1A03G0272800	TraesCS4A03G0681400	0.297135
TraesCS1A03G0272800	TraesCS4A03G0752500	0.307111
TraesCS1A03G0272800	TraesCS4B03G0032400	0.296399
TraesCS1A03G0272800	TraesCS4B03G0662400	0.326233
TraesCS1A03G0272800	TraesCS4D03G0534700	0.350849
TraesCS1A03G0272800	TraesCS4D03G0657600	0.298453
TraesCS1A03G0272800	TraesCS4D03G0833000	0.305473
TraesCS1A03G0272800	TraesCS5B03G0189200	0.319732
TraesCS1A03G0272800	TraesCS5B03G0798700	0.314733
TraesCS1A03G0272800	TraesCS5B03G0981700	0.345951
TraesCS1A03G0272800	TraesCS5B03G1049400	0.290681
TraesCS1A03G0272800	TraesCS5D03G0133600	0.354033
TraesCS1A03G0272800	TraesCS5D03G0361600	0.315912
TraesCS1A03G0272800	TraesCS5D03G0444000	0.334051
TraesCS1A03G0272800	TraesCS5D03G0500400	0.305178
TraesCS1A03G0272800	TraesCS5D03G0890100	0.300032
TraesCS1A03G0272800	TraesCS5D03G0893700	0.300424
TraesCS1A03G0272800	TraesCS5D03G1125100	0.299953
TraesCS1A03G0272800	TraesCS6B03G0234700	0.308473
TraesCS1A03G0272800	TraesCS6D03G0043600	0.29461
TraesCS1A03G0272800	TraesCS7A03G0243900	0.296185
TraesCS1A03G0272800	TraesCS7A03G0292200	0.289372
TraesCS1A03G0272800	TraesCS7A03G0492900	0.289197
TraesCS1A03G0272800	TraesCS7A03G0539000	0.313575
TraesCS1A03G0272800	TraesCS7D03G0824300	0.294389
TraesCS1A03G0272800	TraesCS7D03G1271400	0.300879
TraesCS1A03G0308600	TraesCS1A03G0479500	0.338596
TraesCS1A03G0308600	TraesCS1A03G0634400	0.372779
TraesCS1A03G0308600	TraesCS1A03G0764100	0.289889
TraesCS1A03G0308600	TraesCS1A03G0847000	0.345109
TraesCS1A03G0308600	TraesCS1A03G0968400	0.337912
TraesCS1A03G0308600	TraesCS1A03G1003700	0.3372
TraesCS1A03G0308600	TraesCS1A03G1060100	0.315918
TraesCS1A03G0308600	TraesCS1B03G0591800	0.332794
TraesCS1A03G0308600	TraesCS1B03G0693100	0.307019
TraesCS1A03G0308600	TraesCS1B03G0723500	0.34262
TraesCS1A03G0308600	TraesCS1B03G1065800	0.310452
TraesCS1A03G0308600	TraesCS1B03G1072800	0.341148
TraesCS1A03G0308600	TraesCS1B03G1184200	0.338077
TraesCS1A03G0308600	TraesCS1D03G0235300	0.302212
TraesCS1A03G0308600	TraesCS1D03G0373000	0.312097
TraesCS1A03G0308600	TraesCS1D03G0452900	0.346215
TraesCS1A03G0308600	TraesCS1D03G0594600	0.331536
TraesCS1A03G0308600	TraesCS1D03G0602900	0.312705
TraesCS1A03G0308600	TraesCS1D03G0646300	0.318805
TraesCS1A03G0308600	TraesCS1D03G0777800	0.333343
TraesCS1A03G0308600	TraesCS1D03G0790100	0.359348
TraesCS1A03G0308600	TraesCS1D03G0814800	0.29354
TraesCS1A03G0308600	TraesCS2A03G0132800	0.335351
TraesCS1A03G0308600	TraesCS2A03G0239600	0.365457
TraesCS1A03G0308600	TraesCS2A03G0345600	0.334766
TraesCS1A03G0308600	TraesCS2A03G1000800	0.352382
TraesCS1A03G0308600	TraesCS2A03G1214500	0.351993
TraesCS1A03G0308600	TraesCS2A03G1334600	0.318125
TraesCS1A03G0308600	TraesCS2B03G0027300	0.322808
TraesCS1A03G0308600	TraesCS2B03G0463700	0.304761
TraesCS1A03G0308600	TraesCS2B03G0541200	0.332091
TraesCS1A03G0308600	TraesCS2B03G0959500	0.324206
TraesCS1A03G0308600	TraesCS2B03G1134900	0.295056
TraesCS1A03G0308600	TraesCS2B03G1186800	0.351118
TraesCS1A03G0308600	TraesCS2B03G1267800	0.323448
TraesCS1A03G0308600	TraesCS2B03G1322200	0.322542
TraesCS1A03G0308600	TraesCS2D03G0196100	0.31031
TraesCS1A03G0308600	TraesCS2D03G0240900	0.308845
TraesCS1A03G0308600	TraesCS2D03G0248000	0.346869
TraesCS1A03G0308600	TraesCS2D03G0361400	0.292954
TraesCS1A03G0308600	TraesCS2D03G0467500	0.334735
TraesCS1A03G0308600	TraesCS2D03G0524400	0.328017
TraesCS1A03G0308600	TraesCS2D03G0686300	0.29789
TraesCS1A03G0308600	TraesCS2D03G0705800	0.309237
TraesCS1A03G0308600	TraesCS2D03G0844800	0.304623
TraesCS1A03G0308600	TraesCS2D03G1002600	0.310399
TraesCS1A03G0308600	TraesCS2D03G1277600	0.342522
TraesCS1A03G0308600	TraesCS3A03G0053400	0.310019
TraesCS1A03G0308600	TraesCS3A03G0209200	0.313884
TraesCS1A03G0308600	TraesCS3A03G0219400	0.302805
TraesCS1A03G0308600	TraesCS3A03G0371900	0.317304
TraesCS1A03G0308600	TraesCS3A03G0396300	0.329786
TraesCS1A03G0308600	TraesCS3A03G0589100	0.302398
TraesCS1A03G0308600	TraesCS3A03G0694500	0.298571
TraesCS1A03G0308600	TraesCS3A03G0754500	0.303194
TraesCS1A03G0308600	TraesCS3A03G0790100	0.307404
TraesCS1A03G0308600	TraesCS3A03G0996200	0.337629
TraesCS1A03G0308600	TraesCS3A03G1028300	0.299917
TraesCS1A03G0308600	TraesCS3A03G1082900	0.309771
TraesCS1A03G0308600	TraesCS3B03G0616600	0.322134
TraesCS1A03G0308600	TraesCS3B03G0642900	0.32614
TraesCS1A03G0308600	TraesCS3B03G0669100	0.299026
TraesCS1A03G0308600	TraesCS3B03G0780600	0.314452
TraesCS1A03G0308600	TraesCS3B03G1028000	0.331286
TraesCS1A03G0308600	TraesCS3B03G1145300	0.303673
TraesCS1A03G0308600	TraesCS3B03G1330400	0.332212
TraesCS1A03G0308600	TraesCS3D03G0166700	0.313609
TraesCS1A03G0308600	TraesCS3D03G0529600	0.311276
TraesCS1A03G0308600	TraesCS3D03G0543900	0.296495
TraesCS1A03G0308600	TraesCS3D03G0642800	0.303896
TraesCS1A03G0308600	TraesCS3D03G0675000	0.334288
TraesCS1A03G0308600	TraesCS3D03G0688500	0.36596
TraesCS1A03G0308600	TraesCS3D03G0928400	0.307478
TraesCS1A03G0308600	TraesCS3D03G0946400	0.308923
TraesCS1A03G0308600	TraesCS4A03G0002900	0.326803
TraesCS1A03G0308600	TraesCS4A03G0171400	0.350505
TraesCS1A03G0308600	TraesCS4A03G0491700	0.339351
TraesCS1A03G0308600	TraesCS4A03G0560500	0.331584
TraesCS1A03G0308600	TraesCS4A03G0604400	0.331886
TraesCS1A03G0308600	TraesCS4A03G0621000	0.295407
TraesCS1A03G0308600	TraesCS4A03G0681400	0.320989
TraesCS1A03G0308600	TraesCS4A03G0744900	0.316819
TraesCS1A03G0308600	TraesCS4A03G0752500	0.336361
TraesCS1A03G0308600	TraesCS4A03G0821500	0.304374
TraesCS1A03G0308600	TraesCS4A03G1245300	0.319093
TraesCS1A03G0308600	TraesCS4B03G0080200	0.335728
TraesCS1A03G0308600	TraesCS4B03G0155100	0.289878
TraesCS1A03G0308600	TraesCS4B03G0327300	0.3019
TraesCS1A03G0308600	TraesCS4B03G0662400	0.353459
TraesCS1A03G0308600	TraesCS4B03G0923800	0.326721
TraesCS1A03G0308600	TraesCS4D03G0050400	0.33466
TraesCS1A03G0308600	TraesCS4D03G0156100	0.331822
TraesCS1A03G0308600	TraesCS4D03G0165900	0.325414
TraesCS1A03G0308600	TraesCS4D03G0534700	0.358778
TraesCS1A03G0308600	TraesCS4D03G0657600	0.351224
TraesCS1A03G0308600	TraesCS4D03G0833000	0.323462
TraesCS1A03G0308600	TraesCS4D03G0841400	0.322688
TraesCS1A03G0308600	TraesCS5A03G0368300	0.327403
TraesCS1A03G0308600	TraesCS5A03G0410400	0.298433
TraesCS1A03G0308600	TraesCS5A03G0471800	0.299882
TraesCS1A03G0308600	TraesCS5A03G1162700	0.303528
TraesCS1A03G0308600	TraesCS5A03G1189600	0.301199
TraesCS1A03G0308600	TraesCS5A03G1279700	0.293054
TraesCS1A03G0308600	TraesCS5A03G1280400	0.298582
TraesCS1A03G0308600	TraesCS5B03G0127200	0.3071
TraesCS1A03G0308600	TraesCS5B03G0189200	0.329473
TraesCS1A03G0308600	TraesCS5B03G0189300	0.319723
TraesCS1A03G0308600	TraesCS5B03G0256900	0.301254
TraesCS1A03G0308600	TraesCS5B03G0407400	0.29589
TraesCS1A03G0308600	TraesCS5B03G0509600	0.331053
TraesCS1A03G0308600	TraesCS5B03G0520000	0.320461
TraesCS1A03G0308600	TraesCS5B03G0598300	0.309711
TraesCS1A03G0308600	TraesCS5B03G0798700	0.308693
TraesCS1A03G0308600	TraesCS5B03G0981700	0.339022
TraesCS1A03G0308600	TraesCS5B03G1049400	0.313454
TraesCS1A03G0308600	TraesCS5B03G1219100	0.313824
TraesCS1A03G0308600	TraesCS5D03G0133600	0.358512
TraesCS1A03G0308600	TraesCS5D03G0163800	0.293688
TraesCS1A03G0308600	TraesCS5D03G0245800	0.316093
TraesCS1A03G0308600	TraesCS5D03G0361600	0.298196
TraesCS1A03G0308600	TraesCS5D03G0444000	0.331736
TraesCS1A03G0308600	TraesCS5D03G0479000	0.29535
TraesCS1A03G0308600	TraesCS5D03G0500400	0.320468
TraesCS1A03G0308600	TraesCS5D03G0890100	0.296641
TraesCS1A03G0308600	TraesCS5D03G0893700	0.301103
TraesCS1A03G0308600	TraesCS5D03G0979300	0.340585
TraesCS1A03G0308600	TraesCS5D03G1125100	0.345335
TraesCS1A03G0308600	TraesCS6B03G0179100	0.291529
TraesCS1A03G0308600	TraesCS6B03G0199900	0.304797
TraesCS1A03G0308600	TraesCS6B03G0234700	0.308703
TraesCS1A03G0308600	TraesCS6B03G0929100	0.328034
TraesCS1A03G0308600	TraesCS6D03G0043600	0.351981
TraesCS1A03G0308600	TraesCS6D03G0306800	0.299046
TraesCS1A03G0308600	TraesCS7A03G0292200	0.313904
TraesCS1A03G0308600	TraesCS7A03G0492900	0.299581
TraesCS1A03G0308600	TraesCS7A03G0539000	0.359867
TraesCS1A03G0308600	TraesCS7A03G0610900	0.327101
TraesCS1A03G0308600	TraesCS7A03G0824800	0.309455
TraesCS1A03G0308600	TraesCS7A03G1134500	0.327278
TraesCS1A03G0308600	TraesCS7A03G1223100	0.304622
TraesCS1A03G0308600	TraesCS7A03G1267400	0.301171
TraesCS1A03G0308600	TraesCS7A03G1336800	0.32579
TraesCS1A03G0308600	TraesCS7B03G0003100	0.341509
TraesCS1A03G0308600	TraesCS7B03G0053800	0.322729
TraesCS1A03G0308600	TraesCS7B03G0075400	0.318123
TraesCS1A03G0308600	TraesCS7B03G0306700	0.307592
TraesCS1A03G0308600	TraesCS7B03G0306900	0.33492
TraesCS1A03G0308600	TraesCS7B03G0393800	0.342257
TraesCS1A03G0308600	TraesCS7B03G0698500	0.30137
TraesCS1A03G0308600	TraesCS7B03G0780600	0.30343
TraesCS1A03G0308600	TraesCS7B03G1087800	0.291259
TraesCS1A03G0308600	TraesCS7B03G1178300	0.326346
TraesCS1A03G0308600	TraesCS7D03G0176900	0.311477
TraesCS1A03G0308600	TraesCS7D03G0357800	0.312885
TraesCS1A03G0308600	TraesCS7D03G0551500	0.321286
TraesCS1A03G0308600	TraesCS7D03G0611800	0.298985
TraesCS1A03G0308600	TraesCS7D03G0809500	0.311408
TraesCS1A03G0308600	TraesCS7D03G0824300	0.314437
TraesCS1A03G0308600	TraesCS7D03G1007000	0.294357
TraesCS1A03G0308600	TraesCS7D03G1052900	0.320601
TraesCS1A03G0308600	TraesCS7D03G1271400	0.309505
TraesCS1A03G0334100	TraesCS1B03G0693100	0.305788
TraesCS1A03G0334100	TraesCS1D03G0790100	0.291341
TraesCS1A03G0334100	TraesCS2A03G1000800	0.306849
TraesCS1A03G0334100	TraesCS2B03G1186800	0.30183
TraesCS1A03G0334100	TraesCS2D03G1170700	0.290146
TraesCS1A03G0334100	TraesCS3A03G0996200	0.312935
TraesCS1A03G0334100	TraesCS3B03G0642900	0.292894
TraesCS1A03G0334100	TraesCS3D03G0688500	0.304468
TraesCS1A03G0334100	TraesCS4A03G0171400	0.301072
TraesCS1A03G0334100	TraesCS5B03G0981700	0.316747
TraesCS1A03G0334100	TraesCS5B03G1049400	0.292399
TraesCS1A03G0334100	TraesCS5D03G0133600	0.303349
TraesCS1A03G0334100	TraesCS5D03G0361600	0.307337
TraesCS1A03G0334100	TraesCS5D03G0890100	0.290264
TraesCS1A03G0334100	TraesCS6D03G0043600	0.296236
TraesCS1A03G0334100	TraesCS7A03G0292200	0.320859
TraesCS1A03G0479500	TraesCS1A03G0608300	0.292672
TraesCS1A03G0479500	TraesCS1A03G0634400	0.38241
TraesCS1A03G0479500	TraesCS1A03G0764100	0.320323
TraesCS1A03G0479500	TraesCS1A03G0782200	0.300026
TraesCS1A03G0479500	TraesCS1A03G0788400	0.318958
TraesCS1A03G0479500	TraesCS1A03G0847000	0.356969
TraesCS1A03G0479500	TraesCS1A03G0887900	0.290634
TraesCS1A03G0479500	TraesCS1A03G0968400	0.334779
TraesCS1A03G0479500	TraesCS1A03G1003700	0.299938
TraesCS1A03G0479500	TraesCS1A03G1060100	0.358651
TraesCS1A03G0479500	TraesCS1A03G1079100	0.323622
TraesCS1A03G0479500	TraesCS1B03G0192900	0.301637
TraesCS1A03G0479500	TraesCS1B03G0325000	0.346606
TraesCS1A03G0479500	TraesCS1B03G0591800	0.304388
TraesCS1A03G0479500	TraesCS1B03G0693100	0.327485
TraesCS1A03G0479500	TraesCS1B03G0723500	0.369565
TraesCS1A03G0479500	TraesCS1B03G0772800	0.340547
TraesCS1A03G0479500	TraesCS1B03G1072800	0.303005
TraesCS1A03G0479500	TraesCS1B03G1184200	0.310956
TraesCS1A03G0479500	TraesCS1D03G0373000	0.34825
TraesCS1A03G0479500	TraesCS1D03G0452900	0.349659
TraesCS1A03G0479500	TraesCS1D03G0594600	0.329234
TraesCS1A03G0479500	TraesCS1D03G0602900	0.335106
TraesCS1A03G0479500	TraesCS1D03G0777800	0.328798
TraesCS1A03G0479500	TraesCS1D03G0790100	0.352557
TraesCS1A03G0479500	TraesCS1D03G0814800	0.305924
TraesCS1A03G0479500	TraesCS1D03G0848000	0.322649
TraesCS1A03G0479500	TraesCS1D03G1020400	0.340201
TraesCS1A03G0479500	TraesCS2A03G0132800	0.352274
TraesCS1A03G0479500	TraesCS2A03G0239600	0.363476
TraesCS1A03G0479500	TraesCS2A03G0337700	0.33068
TraesCS1A03G0479500	TraesCS2A03G0345600	0.33463
TraesCS1A03G0479500	TraesCS2A03G0608600	0.300094
TraesCS1A03G0479500	TraesCS2A03G0649900	0.348323
TraesCS1A03G0479500	TraesCS2A03G1000800	0.325796
TraesCS1A03G0479500	TraesCS2A03G1166300	0.311765
TraesCS1A03G0479500	TraesCS2A03G1214500	0.333309
TraesCS1A03G0479500	TraesCS2A03G1311600	0.339464
TraesCS1A03G0479500	TraesCS2B03G0027300	0.29437
TraesCS1A03G0479500	TraesCS2B03G0463700	0.327787
TraesCS1A03G0479500	TraesCS2B03G0503500	0.292293
TraesCS1A03G0479500	TraesCS2B03G0541200	0.309302
TraesCS1A03G0479500	TraesCS2B03G0698600	0.346009
TraesCS1A03G0479500	TraesCS2B03G0959500	0.358617
TraesCS1A03G0479500	TraesCS2B03G1134900	0.304149
TraesCS1A03G0479500	TraesCS2B03G1186800	0.370516
TraesCS1A03G0479500	TraesCS2B03G1267800	0.310397
TraesCS1A03G0479500	TraesCS2B03G1322200	0.337343
TraesCS1A03G0479500	TraesCS2D03G0196100	0.316487
TraesCS1A03G0479500	TraesCS2D03G0240900	0.321854
TraesCS1A03G0479500	TraesCS2D03G0248000	0.322431
TraesCS1A03G0479500	TraesCS2D03G0355800	0.335834
TraesCS1A03G0479500	TraesCS2D03G0361400	0.328416
TraesCS1A03G0479500	TraesCS2D03G0467500	0.36325
TraesCS1A03G0479500	TraesCS2D03G0524400	0.323045
TraesCS1A03G0479500	TraesCS2D03G0619100	0.31311
TraesCS1A03G0479500	TraesCS2D03G1002600	0.348077
TraesCS1A03G0479500	TraesCS2D03G1099200	0.291432
TraesCS1A03G0479500	TraesCS2D03G1277600	0.369407
TraesCS1A03G0479500	TraesCS3A03G0053400	0.308476
TraesCS1A03G0479500	TraesCS3A03G0184200	0.332285
TraesCS1A03G0479500	TraesCS3A03G0209200	0.347526
TraesCS1A03G0479500	TraesCS3A03G0219400	0.29967
TraesCS1A03G0479500	TraesCS3A03G0265900	0.329819
TraesCS1A03G0479500	TraesCS3A03G0371900	0.361741
TraesCS1A03G0479500	TraesCS3A03G0396300	0.311101
TraesCS1A03G0479500	TraesCS3A03G0694500	0.323301
TraesCS1A03G0479500	TraesCS3A03G0720500	0.323936
TraesCS1A03G0479500	TraesCS3A03G0790100	0.330231
TraesCS1A03G0479500	TraesCS3A03G0815600	0.352372
TraesCS1A03G0479500	TraesCS3A03G0996200	0.299342
TraesCS1A03G0479500	TraesCS3A03G1028300	0.302404
TraesCS1A03G0479500	TraesCS3A03G1082900	0.345583
TraesCS1A03G0479500	TraesCS3A03G1192100	0.319688
TraesCS1A03G0479500	TraesCS3B03G0397500	0.321063
TraesCS1A03G0479500	TraesCS3B03G0616600	0.3521
TraesCS1A03G0479500	TraesCS3B03G0642900	0.356353
TraesCS1A03G0479500	TraesCS3B03G0669100	0.299853
TraesCS1A03G0479500	TraesCS3B03G0780600	0.306795
TraesCS1A03G0479500	TraesCS3B03G1017600	0.340829
TraesCS1A03G0479500	TraesCS3B03G1028000	0.365721
TraesCS1A03G0479500	TraesCS3B03G1106800	0.304428
TraesCS1A03G0479500	TraesCS3B03G1145300	0.314929
TraesCS1A03G0479500	TraesCS3B03G1196000	0.305049
TraesCS1A03G0479500	TraesCS3B03G1208500	0.31641
TraesCS1A03G0479500	TraesCS3B03G1211400	0.340835
TraesCS1A03G0479500	TraesCS3B03G1330400	0.349643
TraesCS1A03G0479500	TraesCS3D03G0166700	0.342574
TraesCS1A03G0479500	TraesCS3D03G0529600	0.322519
TraesCS1A03G0479500	TraesCS3D03G0688500	0.380295
TraesCS1A03G0479500	TraesCS3D03G0714500	0.29732
TraesCS1A03G0479500	TraesCS3D03G0928400	0.303752
TraesCS1A03G0479500	TraesCS3D03G0946400	0.305001
TraesCS1A03G0479500	TraesCS4A03G0002900	0.299885
TraesCS1A03G0479500	TraesCS4A03G0069900	0.309638
TraesCS1A03G0479500	TraesCS4A03G0083100	0.295473
TraesCS1A03G0479500	TraesCS4A03G0171400	0.365923
TraesCS1A03G0479500	TraesCS4A03G0188400	0.331446
TraesCS1A03G0479500	TraesCS4A03G0491700	0.340858
TraesCS1A03G0479500	TraesCS4A03G0533000	0.292271
TraesCS1A03G0479500	TraesCS4A03G0560500	0.291233
TraesCS1A03G0479500	TraesCS4A03G0604400	0.354348
TraesCS1A03G0479500	TraesCS4A03G0621000	0.313988
TraesCS1A03G0479500	TraesCS4A03G0681400	0.355451
TraesCS1A03G0479500	TraesCS4A03G0744900	0.302514
TraesCS1A03G0479500	TraesCS4A03G0752500	0.345734
TraesCS1A03G0479500	TraesCS4A03G0821500	0.32264
TraesCS1A03G0479500	TraesCS4A03G0963200	0.33478
TraesCS1A03G0479500	TraesCS4A03G1245300	0.345297
TraesCS1A03G0479500	TraesCS4B03G0032400	0.300247
TraesCS1A03G0479500	TraesCS4B03G0080200	0.33988
TraesCS1A03G0479500	TraesCS4B03G0155100	0.350246
TraesCS1A03G0479500	TraesCS4B03G0327300	0.331206
TraesCS1A03G0479500	TraesCS4B03G0662400	0.344665
TraesCS1A03G0479500	TraesCS4B03G0715100	0.300334
TraesCS1A03G0479500	TraesCS4B03G0923800	0.317488
TraesCS1A03G0479500	TraesCS4B03G0961100	0.304893
TraesCS1A03G0479500	TraesCS4D03G0050400	0.327105
TraesCS1A03G0479500	TraesCS4D03G0060200	0.291015
TraesCS1A03G0479500	TraesCS4D03G0130100	0.291085
TraesCS1A03G0479500	TraesCS4D03G0156100	0.303177
TraesCS1A03G0479500	TraesCS4D03G0165900	0.346195
TraesCS1A03G0479500	TraesCS4D03G0522100	0.333181
TraesCS1A03G0479500	TraesCS4D03G0534700	0.361024
TraesCS1A03G0479500	TraesCS4D03G0627100	0.311282
TraesCS1A03G0479500	TraesCS4D03G0657600	0.373337
TraesCS1A03G0479500	TraesCS4D03G0833000	0.32284
TraesCS1A03G0479500	TraesCS4D03G0841400	0.28976
TraesCS1A03G0479500	TraesCS5A03G0113700	0.329805
TraesCS1A03G0479500	TraesCS5A03G0368300	0.290656
TraesCS1A03G0479500	TraesCS5A03G0410400	0.347616
TraesCS1A03G0479500	TraesCS5A03G0471800	0.292089
TraesCS1A03G0479500	TraesCS5A03G0931300	0.29837
TraesCS1A03G0479500	TraesCS5A03G1140600	0.346653
TraesCS1A03G0479500	TraesCS5A03G1162700	0.344126
TraesCS1A03G0479500	TraesCS5A03G1189600	0.333852
TraesCS1A03G0479500	TraesCS5A03G1220100	0.34453
TraesCS1A03G0479500	TraesCS5A03G1278000	0.337044
TraesCS1A03G0479500	TraesCS5A03G1279700	0.342732
TraesCS1A03G0479500	TraesCS5A03G1280400	0.304033
TraesCS1A03G0479500	TraesCS5B03G0127200	0.351525
TraesCS1A03G0479500	TraesCS5B03G0189200	0.345251
TraesCS1A03G0479500	TraesCS5B03G0256900	0.306517
TraesCS1A03G0479500	TraesCS5B03G0328600	0.304695
TraesCS1A03G0479500	TraesCS5B03G0509600	0.346267
TraesCS1A03G0479500	TraesCS5B03G0598300	0.295855
TraesCS1A03G0479500	TraesCS5B03G0798700	0.332455
TraesCS1A03G0479500	TraesCS5B03G0835100	0.308432
TraesCS1A03G0479500	TraesCS5B03G0981700	0.345667
TraesCS1A03G0479500	TraesCS5B03G1049400	0.317692
TraesCS1A03G0479500	TraesCS5B03G1140700	0.314952
TraesCS1A03G0479500	TraesCS5D03G0133600	0.372115
TraesCS1A03G0479500	TraesCS5D03G0245800	0.300294
TraesCS1A03G0479500	TraesCS5D03G0361600	0.317877
TraesCS1A03G0479500	TraesCS5D03G0435100	0.295721
TraesCS1A03G0479500	TraesCS5D03G0444000	0.337864
TraesCS1A03G0479500	TraesCS5D03G0479000	0.303523
TraesCS1A03G0479500	TraesCS5D03G0500400	0.297486
TraesCS1A03G0479500	TraesCS5D03G0723700	0.299522
TraesCS1A03G0479500	TraesCS5D03G0890100	0.307431
TraesCS1A03G0479500	TraesCS5D03G0893700	0.297728
TraesCS1A03G0479500	TraesCS5D03G0979300	0.338576
TraesCS1A03G0479500	TraesCS5D03G1125100	0.333829
TraesCS1A03G0479500	TraesCS6B03G0179100	0.301716
TraesCS1A03G0479500	TraesCS6B03G0199900	0.356601
TraesCS1A03G0479500	TraesCS6B03G0234700	0.323742
TraesCS1A03G0479500	TraesCS6B03G0722300	0.319705
TraesCS1A03G0479500	TraesCS6B03G0929100	0.295721
TraesCS1A03G0479500	TraesCS6B03G1088900	0.32196
TraesCS1A03G0479500	TraesCS6D03G0043600	0.339684
TraesCS1A03G0479500	TraesCS7A03G0209400	0.316545
TraesCS1A03G0479500	TraesCS7A03G0222300	0.305615
TraesCS1A03G0479500	TraesCS7A03G0243900	0.31143
TraesCS1A03G0479500	TraesCS7A03G0292200	0.291205
TraesCS1A03G0479500	TraesCS7A03G0492900	0.30625
TraesCS1A03G0479500	TraesCS7A03G0539000	0.331185
TraesCS1A03G0479500	TraesCS7A03G0610900	0.305944
TraesCS1A03G0479500	TraesCS7A03G0679300	0.326744
TraesCS1A03G0479500	TraesCS7A03G0759000	0.307499
TraesCS1A03G0479500	TraesCS7A03G0822800	0.290342
TraesCS1A03G0479500	TraesCS7A03G0824800	0.349562
TraesCS1A03G0479500	TraesCS7A03G0868600	0.321972
TraesCS1A03G0479500	TraesCS7A03G1057000	0.359316
TraesCS1A03G0479500	TraesCS7A03G1134500	0.334351
TraesCS1A03G0479500	TraesCS7A03G1267400	0.336116
TraesCS1A03G0479500	TraesCS7B03G0003100	0.347778
TraesCS1A03G0479500	TraesCS7B03G0053800	0.33931
TraesCS1A03G0479500	TraesCS7B03G0075400	0.349451
TraesCS1A03G0479500	TraesCS7B03G0170900	0.314578
TraesCS1A03G0479500	TraesCS7B03G0306700	0.33577
TraesCS1A03G0479500	TraesCS7B03G0306900	0.306744
TraesCS1A03G0479500	TraesCS7B03G0393800	0.341464
TraesCS1A03G0479500	TraesCS7B03G0698500	0.336149
TraesCS1A03G0479500	TraesCS7B03G0780600	0.309452
TraesCS1A03G0479500	TraesCS7B03G1087800	0.327538
TraesCS1A03G0479500	TraesCS7B03G1178300	0.35687
TraesCS1A03G0479500	TraesCS7D03G0176900	0.308914
TraesCS1A03G0479500	TraesCS7D03G0357800	0.359745
TraesCS1A03G0479500	TraesCS7D03G0551500	0.305457
TraesCS1A03G0479500	TraesCS7D03G0809500	0.292286
TraesCS1A03G0479500	TraesCS7D03G0824300	0.354052
TraesCS1A03G0479500	TraesCS7D03G1105700	0.322259
TraesCS1A03G0479500	TraesCS7D03G1271400	0.327106
TraesCS1A03G0608300	TraesCS1A03G0634400	0.310996
TraesCS1A03G0608300	TraesCS1A03G0788400	0.315828
TraesCS1A03G0608300	TraesCS1A03G1060100	0.288996
TraesCS1A03G0608300	TraesCS1B03G0192900	0.323222
TraesCS1A03G0608300	TraesCS1B03G0693100	0.292223
TraesCS1A03G0608300	TraesCS1B03G0723500	0.325437
TraesCS1A03G0608300	TraesCS1D03G0790100	0.290244
TraesCS1A03G0608300	TraesCS2A03G0132800	0.326595
TraesCS1A03G0608300	TraesCS2A03G0337700	0.302686
TraesCS1A03G0608300	TraesCS2A03G1311600	0.288906
TraesCS1A03G0608300	TraesCS2B03G0698600	0.297879
TraesCS1A03G0608300	TraesCS2B03G0959500	0.342911
TraesCS1A03G0608300	TraesCS2B03G1186800	0.322835
TraesCS1A03G0608300	TraesCS2D03G0361400	0.300435
TraesCS1A03G0608300	TraesCS2D03G1002600	0.315215
TraesCS1A03G0608300	TraesCS3A03G0371900	0.303415
TraesCS1A03G0608300	TraesCS3B03G0642900	0.316547
TraesCS1A03G0608300	TraesCS3B03G1196000	0.314363
TraesCS1A03G0608300	TraesCS3D03G0166700	0.315471
TraesCS1A03G0608300	TraesCS3D03G0688500	0.312239
TraesCS1A03G0608300	TraesCS4A03G0069900	0.295972
TraesCS1A03G0608300	TraesCS4A03G0171400	0.321903
TraesCS1A03G0608300	TraesCS4A03G0188400	0.28986
TraesCS1A03G0608300	TraesCS4A03G0963200	0.318622
TraesCS1A03G0608300	TraesCS4B03G0155100	0.295613
TraesCS1A03G0608300	TraesCS4D03G0130100	0.301433
TraesCS1A03G0608300	TraesCS4D03G0522100	0.321914
TraesCS1A03G0608300	TraesCS4D03G0534700	0.305127
TraesCS1A03G0608300	TraesCS5A03G1140600	0.314441
TraesCS1A03G0608300	TraesCS5A03G1162700	0.290766
TraesCS1A03G0608300	TraesCS5B03G0798700	0.298948
TraesCS1A03G0608300	TraesCS5B03G0981700	0.304058
TraesCS1A03G0608300	TraesCS5B03G1140700	0.298272
TraesCS1A03G0608300	TraesCS5D03G0133600	0.334199
TraesCS1A03G0608300	TraesCS7A03G0209400	0.298539
TraesCS1A03G0608300	TraesCS7A03G0243900	0.304577
TraesCS1A03G0608300	TraesCS7B03G0170900	0.315007
TraesCS1A03G0608300	TraesCS7D03G0357800	0.318034
TraesCS1A03G0608300	TraesCS7D03G1271400	0.292475
TraesCS1A03G0634400	TraesCS1A03G0654300	0.292582
TraesCS1A03G0634400	TraesCS1A03G0764100	0.346925
TraesCS1A03G0634400	TraesCS1A03G0782200	0.318153
TraesCS1A03G0634400	TraesCS1A03G0788400	0.348349
TraesCS1A03G0634400	TraesCS1A03G0847000	0.379589
TraesCS1A03G0634400	TraesCS1A03G0887900	0.34251
TraesCS1A03G0634400	TraesCS1A03G0968400	0.366541
TraesCS1A03G0634400	TraesCS1A03G1003700	0.34744
TraesCS1A03G0634400	TraesCS1A03G1039400	0.293662
TraesCS1A03G0634400	TraesCS1A03G1060100	0.360791
TraesCS1A03G0634400	TraesCS1A03G1079100	0.3366
TraesCS1A03G0634400	TraesCS1B03G0192900	0.337291
TraesCS1A03G0634400	TraesCS1B03G0325000	0.36025
TraesCS1A03G0634400	TraesCS1B03G0591800	0.349598
TraesCS1A03G0634400	TraesCS1B03G0649800	0.297205
TraesCS1A03G0634400	TraesCS1B03G0693100	0.369297
TraesCS1A03G0634400	TraesCS1B03G0723500	0.382857
TraesCS1A03G0634400	TraesCS1B03G0772800	0.350297
TraesCS1A03G0634400	TraesCS1B03G0796800	0.307215
TraesCS1A03G0634400	TraesCS1B03G1065800	0.330396
TraesCS1A03G0634400	TraesCS1B03G1072800	0.343724
TraesCS1A03G0634400	TraesCS1B03G1184200	0.357131
TraesCS1A03G0634400	TraesCS1B03G1275100	0.30834
TraesCS1A03G0634400	TraesCS1D03G0235300	0.321917
TraesCS1A03G0634400	TraesCS1D03G0373000	0.359714
TraesCS1A03G0634400	TraesCS1D03G0452900	0.370561
TraesCS1A03G0634400	TraesCS1D03G0547500	0.299708
TraesCS1A03G0634400	TraesCS1D03G0594600	0.369086
TraesCS1A03G0634400	TraesCS1D03G0602900	0.369591
TraesCS1A03G0634400	TraesCS1D03G0646300	0.331823
TraesCS1A03G0634400	TraesCS1D03G0668000	0.292577
TraesCS1A03G0634400	TraesCS1D03G0777800	0.369792
TraesCS1A03G0634400	TraesCS1D03G0790100	0.382491
TraesCS1A03G0634400	TraesCS1D03G0814800	0.351159
TraesCS1A03G0634400	TraesCS1D03G0848000	0.345663
TraesCS1A03G0634400	TraesCS1D03G1020400	0.349009
TraesCS1A03G0634400	TraesCS2A03G0132800	0.382706
TraesCS1A03G0634400	TraesCS2A03G0239600	0.38853
TraesCS1A03G0634400	TraesCS2A03G0337700	0.370761
TraesCS1A03G0634400	TraesCS2A03G0345600	0.361032
TraesCS1A03G0634400	TraesCS2A03G0378700	0.305473
TraesCS1A03G0634400	TraesCS2A03G0608600	0.341939
TraesCS1A03G0634400	TraesCS2A03G0649900	0.354171
TraesCS1A03G0634400	TraesCS2A03G0873900	0.32396
TraesCS1A03G0634400	TraesCS2A03G0910800	0.334486
TraesCS1A03G0634400	TraesCS2A03G0930300	0.303136
TraesCS1A03G0634400	TraesCS2A03G0953400	0.292927
TraesCS1A03G0634400	TraesCS2A03G1000800	0.372917
TraesCS1A03G0634400	TraesCS2A03G1150000	0.28948
TraesCS1A03G0634400	TraesCS2A03G1166300	0.338308
TraesCS1A03G0634400	TraesCS2A03G1214500	0.366603
TraesCS1A03G0634400	TraesCS2A03G1311600	0.346919
TraesCS1A03G0634400	TraesCS2A03G1334600	0.343173
TraesCS1A03G0634400	TraesCS2B03G0027300	0.337532
TraesCS1A03G0634400	TraesCS2B03G0463700	0.364067
TraesCS1A03G0634400	TraesCS2B03G0503500	0.333377
TraesCS1A03G0634400	TraesCS2B03G0541200	0.339727
TraesCS1A03G0634400	TraesCS2B03G0698600	0.347226
TraesCS1A03G0634400	TraesCS2B03G0886100	0.308546
TraesCS1A03G0634400	TraesCS2B03G0959500	0.371529
TraesCS1A03G0634400	TraesCS2B03G1047500	0.324109
TraesCS1A03G0634400	TraesCS2B03G1134900	0.331083
TraesCS1A03G0634400	TraesCS2B03G1186800	0.386763
TraesCS1A03G0634400	TraesCS2B03G1267800	0.35753
TraesCS1A03G0634400	TraesCS2B03G1298000	0.293255
TraesCS1A03G0634400	TraesCS2B03G1322200	0.351923
TraesCS1A03G0634400	TraesCS2B03G1388000	0.315185
TraesCS1A03G0634400	TraesCS2D03G0019400	0.299577
TraesCS1A03G0634400	TraesCS2D03G0196100	0.359211
TraesCS1A03G0634400	TraesCS2D03G0240900	0.349332
TraesCS1A03G0634400	TraesCS2D03G0248000	0.36009
TraesCS1A03G0634400	TraesCS2D03G0355800	0.356834
TraesCS1A03G0634400	TraesCS2D03G0361400	0.367542
TraesCS1A03G0634400	TraesCS2D03G0396200	0.306114
TraesCS1A03G0634400	TraesCS2D03G0467500	0.381695
TraesCS1A03G0634400	TraesCS2D03G0524400	0.358621
TraesCS1A03G0634400	TraesCS2D03G0582100	0.30125
TraesCS1A03G0634400	TraesCS2D03G0619100	0.339792
TraesCS1A03G0634400	TraesCS2D03G0686300	0.296473
TraesCS1A03G0634400	TraesCS2D03G0705800	0.314468
TraesCS1A03G0634400	TraesCS2D03G0740600	0.316259
TraesCS1A03G0634400	TraesCS2D03G0844800	0.31735
TraesCS1A03G0634400	TraesCS2D03G0889900	0.301212
TraesCS1A03G0634400	TraesCS2D03G1002600	0.363842
TraesCS1A03G0634400	TraesCS2D03G1099200	0.311648
TraesCS1A03G0634400	TraesCS2D03G1134400	0.296369
TraesCS1A03G0634400	TraesCS2D03G1170700	0.306466
TraesCS1A03G0634400	TraesCS2D03G1277600	0.376865
TraesCS1A03G0634400	TraesCS3A03G0053400	0.335914
TraesCS1A03G0634400	TraesCS3A03G0184200	0.337812
TraesCS1A03G0634400	TraesCS3A03G0209200	0.365826
TraesCS1A03G0634400	TraesCS3A03G0219400	0.353544
TraesCS1A03G0634400	TraesCS3A03G0265900	0.335
TraesCS1A03G0634400	TraesCS3A03G0320700	0.315163
TraesCS1A03G0634400	TraesCS3A03G0371900	0.371952
TraesCS1A03G0634400	TraesCS3A03G0396300	0.363158
TraesCS1A03G0634400	TraesCS3A03G0589100	0.338317
TraesCS1A03G0634400	TraesCS3A03G0606100	0.289294
TraesCS1A03G0634400	TraesCS3A03G0694500	0.355838
TraesCS1A03G0634400	TraesCS3A03G0700600	0.289679
TraesCS1A03G0634400	TraesCS3A03G0720500	0.334068
TraesCS1A03G0634400	TraesCS3A03G0754500	0.33248
TraesCS1A03G0634400	TraesCS3A03G0790100	0.347259
TraesCS1A03G0634400	TraesCS3A03G0815600	0.360367
TraesCS1A03G0634400	TraesCS3A03G0943600	0.313072
TraesCS1A03G0634400	TraesCS3A03G0996200	0.347595
TraesCS1A03G0634400	TraesCS3A03G1028300	0.350578
TraesCS1A03G0634400	TraesCS3A03G1082900	0.35267
TraesCS1A03G0634400	TraesCS3A03G1192100	0.344597
TraesCS1A03G0634400	TraesCS3B03G0353200	0.319601
TraesCS1A03G0634400	TraesCS3B03G0397500	0.345245
TraesCS1A03G0634400	TraesCS3B03G0616600	0.361403
TraesCS1A03G0634400	TraesCS3B03G0642900	0.368784
TraesCS1A03G0634400	TraesCS3B03G0669100	0.345021
TraesCS1A03G0634400	TraesCS3B03G0716600	0.340455
TraesCS1A03G0634400	TraesCS3B03G0780600	0.357857
TraesCS1A03G0634400	TraesCS3B03G0791600	0.292343
TraesCS1A03G0634400	TraesCS3B03G1017600	0.343387
TraesCS1A03G0634400	TraesCS3B03G1028000	0.372535
TraesCS1A03G0634400	TraesCS3B03G1106800	0.332443
TraesCS1A03G0634400	TraesCS3B03G1135800	0.303623
TraesCS1A03G0634400	TraesCS3B03G1145300	0.334926
TraesCS1A03G0634400	TraesCS3B03G1196000	0.330894
TraesCS1A03G0634400	TraesCS3B03G1208500	0.331043
TraesCS1A03G0634400	TraesCS3B03G1211400	0.360059
TraesCS1A03G0634400	TraesCS3B03G1330400	0.349341
TraesCS1A03G0634400	TraesCS3D03G0034200	0.298509
TraesCS1A03G0634400	TraesCS3D03G0166700	0.366754
TraesCS1A03G0634400	TraesCS3D03G0529600	0.36039
TraesCS1A03G0634400	TraesCS3D03G0543900	0.311126
TraesCS1A03G0634400	TraesCS3D03G0582800	0.326586
TraesCS1A03G0634400	TraesCS3D03G0584900	0.312368
TraesCS1A03G0634400	TraesCS3D03G0642600	0.294345
TraesCS1A03G0634400	TraesCS3D03G0642800	0.332078
TraesCS1A03G0634400	TraesCS3D03G0675000	0.33792
TraesCS1A03G0634400	TraesCS3D03G0688500	0.389877
TraesCS1A03G0634400	TraesCS3D03G0714500	0.328168
TraesCS1A03G0634400	TraesCS3D03G0745500	0.294475
TraesCS1A03G0634400	TraesCS3D03G0811100	0.300687
TraesCS1A03G0634400	TraesCS3D03G0928400	0.353888
TraesCS1A03G0634400	TraesCS3D03G0946400	0.34602
TraesCS1A03G0634400	TraesCS3D03G1047100	0.293808
TraesCS1A03G0634400	TraesCS4A03G0002900	0.348259
TraesCS1A03G0634400	TraesCS4A03G0069900	0.331049
TraesCS1A03G0634400	TraesCS4A03G0083100	0.321479
TraesCS1A03G0634400	TraesCS4A03G0170100	0.308815
TraesCS1A03G0634400	TraesCS4A03G0171400	0.386823
TraesCS1A03G0634400	TraesCS4A03G0188400	0.343314
TraesCS1A03G0634400	TraesCS4A03G0491700	0.370089
TraesCS1A03G0634400	TraesCS4A03G0533000	0.339167
TraesCS1A03G0634400	TraesCS4A03G0560500	0.33992
TraesCS1A03G0634400	TraesCS4A03G0604400	0.367397
TraesCS1A03G0634400	TraesCS4A03G0621000	0.338215
TraesCS1A03G0634400	TraesCS4A03G0648700	0.303244
TraesCS1A03G0634400	TraesCS4A03G0681400	0.384653
TraesCS1A03G0634400	TraesCS4A03G0744900	0.357358
TraesCS1A03G0634400	TraesCS4A03G0752500	0.380947
TraesCS1A03G0634400	TraesCS4A03G0821500	0.355149
TraesCS1A03G0634400	TraesCS4A03G0963200	0.355606
TraesCS1A03G0634400	TraesCS4A03G1245300	0.359489
TraesCS1A03G0634400	TraesCS4B03G0032400	0.337322
TraesCS1A03G0634400	TraesCS4B03G0080200	0.359264
TraesCS1A03G0634400	TraesCS4B03G0155100	0.369072
TraesCS1A03G0634400	TraesCS4B03G0291800	0.29452
TraesCS1A03G0634400	TraesCS4B03G0327300	0.364719
TraesCS1A03G0634400	TraesCS4B03G0662400	0.370087
TraesCS1A03G0634400	TraesCS4B03G0715100	0.311774
TraesCS1A03G0634400	TraesCS4B03G0923800	0.348934
TraesCS1A03G0634400	TraesCS4B03G0961100	0.315866
TraesCS1A03G0634400	TraesCS4D03G0022700	0.312415
TraesCS1A03G0634400	TraesCS4D03G0030100	0.314442
TraesCS1A03G0634400	TraesCS4D03G0050400	0.354898
TraesCS1A03G0634400	TraesCS4D03G0060200	0.308082
TraesCS1A03G0634400	TraesCS4D03G0088000	0.30918
TraesCS1A03G0634400	TraesCS4D03G0130100	0.323336
TraesCS1A03G0634400	TraesCS4D03G0156100	0.34462
TraesCS1A03G0634400	TraesCS4D03G0165900	0.370167
TraesCS1A03G0634400	TraesCS4D03G0267500	0.324807
TraesCS1A03G0634400	TraesCS4D03G0454600	0.314145
TraesCS1A03G0634400	TraesCS4D03G0522100	0.350608
TraesCS1A03G0634400	TraesCS4D03G0534700	0.389053
TraesCS1A03G0634400	TraesCS4D03G0627100	0.351711
TraesCS1A03G0634400	TraesCS4D03G0657600	0.375074
TraesCS1A03G0634400	TraesCS4D03G0833000	0.362782
TraesCS1A03G0634400	TraesCS4D03G0841400	0.335084
TraesCS1A03G0634400	TraesCS5A03G0112400	0.320658
TraesCS1A03G0634400	TraesCS5A03G0113700	0.351904
TraesCS1A03G0634400	TraesCS5A03G0225900	0.30699
TraesCS1A03G0634400	TraesCS5A03G0368300	0.33487
TraesCS1A03G0634400	TraesCS5A03G0410400	0.360802
TraesCS1A03G0634400	TraesCS5A03G0424100	0.333101
TraesCS1A03G0634400	TraesCS5A03G0471800	0.344223
TraesCS1A03G0634400	TraesCS5A03G0931300	0.346166
TraesCS1A03G0634400	TraesCS5A03G1018800	0.309914
TraesCS1A03G0634400	TraesCS5A03G1140600	0.366047
TraesCS1A03G0634400	TraesCS5A03G1162700	0.361309
TraesCS1A03G0634400	TraesCS5A03G1189600	0.371234
TraesCS1A03G0634400	TraesCS5A03G1220100	0.356766
TraesCS1A03G0634400	TraesCS5A03G1278000	0.345465
TraesCS1A03G0634400	TraesCS5A03G1279700	0.374944
TraesCS1A03G0634400	TraesCS5A03G1280400	0.354219
TraesCS1A03G0634400	TraesCS5B03G0125400	0.303793
TraesCS1A03G0634400	TraesCS5B03G0127200	0.351865
TraesCS1A03G0634400	TraesCS5B03G0189200	0.374816
TraesCS1A03G0634400	TraesCS5B03G0189300	0.329938
TraesCS1A03G0634400	TraesCS5B03G0256900	0.357238
TraesCS1A03G0634400	TraesCS5B03G0328600	0.327956
TraesCS1A03G0634400	TraesCS5B03G0391600	0.320437
TraesCS1A03G0634400	TraesCS5B03G0407400	0.340278
TraesCS1A03G0634400	TraesCS5B03G0509600	0.352073
TraesCS1A03G0634400	TraesCS5B03G0520000	0.343244
TraesCS1A03G0634400	TraesCS5B03G0598300	0.332512
TraesCS1A03G0634400	TraesCS5B03G0798700	0.372948
TraesCS1A03G0634400	TraesCS5B03G0835100	0.312232
TraesCS1A03G0634400	TraesCS5B03G0981700	0.377989
TraesCS1A03G0634400	TraesCS5B03G1049400	0.358856
TraesCS1A03G0634400	TraesCS5B03G1066300	0.326269
TraesCS1A03G0634400	TraesCS5B03G1140700	0.333662
TraesCS1A03G0634400	TraesCS5B03G1219100	0.337204
TraesCS1A03G0634400	TraesCS5B03G1355600	0.326486
TraesCS1A03G0634400	TraesCS5D03G0091400	0.310459
TraesCS1A03G0634400	TraesCS5D03G0133600	0.384731
TraesCS1A03G0634400	TraesCS5D03G0136400	0.309969
TraesCS1A03G0634400	TraesCS5D03G0163800	0.313241
TraesCS1A03G0634400	TraesCS5D03G0221900	0.303543
TraesCS1A03G0634400	TraesCS5D03G0245800	0.348991
TraesCS1A03G0634400	TraesCS5D03G0344400	0.29277
TraesCS1A03G0634400	TraesCS5D03G0361600	0.361789
TraesCS1A03G0634400	TraesCS5D03G0435100	0.337388
TraesCS1A03G0634400	TraesCS5D03G0444000	0.372684
TraesCS1A03G0634400	TraesCS5D03G0479000	0.349504
TraesCS1A03G0634400	TraesCS5D03G0500400	0.347377
TraesCS1A03G0634400	TraesCS5D03G0723700	0.325539
TraesCS1A03G0634400	TraesCS5D03G0838200	0.307266
TraesCS1A03G0634400	TraesCS5D03G0852400	0.295332
TraesCS1A03G0634400	TraesCS5D03G0878400	0.322217
TraesCS1A03G0634400	TraesCS5D03G0890100	0.357563
TraesCS1A03G0634400	TraesCS5D03G0893700	0.349088
TraesCS1A03G0634400	TraesCS5D03G0902000	0.314068
TraesCS1A03G0634400	TraesCS5D03G0979300	0.379739
TraesCS1A03G0634400	TraesCS5D03G1125100	0.368397
TraesCS1A03G0634400	TraesCS6B03G0179100	0.34244
TraesCS1A03G0634400	TraesCS6B03G0199900	0.370031
TraesCS1A03G0634400	TraesCS6B03G0234700	0.361909
TraesCS1A03G0634400	TraesCS6B03G0496200	0.292538
TraesCS1A03G0634400	TraesCS6B03G0722300	0.340262
TraesCS1A03G0634400	TraesCS6B03G0824200	0.305302
TraesCS1A03G0634400	TraesCS6B03G0929100	0.345524
TraesCS1A03G0634400	TraesCS6B03G1088900	0.341193
TraesCS1A03G0634400	TraesCS6B03G1137500	0.290225
TraesCS1A03G0634400	TraesCS6D03G0043600	0.358134
TraesCS1A03G0634400	TraesCS6D03G0306800	0.32833
TraesCS1A03G0634400	TraesCS6D03G0809600	0.305033
TraesCS1A03G0634400	TraesCS7A03G0209400	0.327741
TraesCS1A03G0634400	TraesCS7A03G0222300	0.32717
TraesCS1A03G0634400	TraesCS7A03G0243900	0.350043
TraesCS1A03G0634400	TraesCS7A03G0292200	0.33141
TraesCS1A03G0634400	TraesCS7A03G0373600	0.332898
TraesCS1A03G0634400	TraesCS7A03G0492900	0.355508
TraesCS1A03G0634400	TraesCS7A03G0539000	0.350304
TraesCS1A03G0634400	TraesCS7A03G0548700	0.330775
TraesCS1A03G0634400	TraesCS7A03G0610900	0.352519
TraesCS1A03G0634400	TraesCS7A03G0679300	0.326839
TraesCS1A03G0634400	TraesCS7A03G0759000	0.344946
TraesCS1A03G0634400	TraesCS7A03G0822800	0.343109
TraesCS1A03G0634400	TraesCS7A03G0824800	0.355825
TraesCS1A03G0634400	TraesCS7A03G0868600	0.332999
TraesCS1A03G0634400	TraesCS7A03G1031700	0.300035
TraesCS1A03G0634400	TraesCS7A03G1057000	0.365316
TraesCS1A03G0634400	TraesCS7A03G1134500	0.373312
TraesCS1A03G0634400	TraesCS7A03G1223100	0.30022
TraesCS1A03G0634400	TraesCS7A03G1267400	0.370319
TraesCS1A03G0634400	TraesCS7A03G1336800	0.333526
TraesCS1A03G0634400	TraesCS7B03G0003100	0.359971
TraesCS1A03G0634400	TraesCS7B03G0053800	0.357461
TraesCS1A03G0634400	TraesCS7B03G0075400	0.374978
TraesCS1A03G0634400	TraesCS7B03G0170900	0.35169
TraesCS1A03G0634400	TraesCS7B03G0306700	0.373195
TraesCS1A03G0634400	TraesCS7B03G0306900	0.350067
TraesCS1A03G0634400	TraesCS7B03G0336700	0.289786
TraesCS1A03G0634400	TraesCS7B03G0393800	0.367917
TraesCS1A03G0634400	TraesCS7B03G0419500	0.292769
TraesCS1A03G0634400	TraesCS7B03G0698500	0.370352
TraesCS1A03G0634400	TraesCS7B03G0780600	0.325624
TraesCS1A03G0634400	TraesCS7B03G1087800	0.370793
TraesCS1A03G0634400	TraesCS7B03G1178300	0.377913
TraesCS1A03G0634400	TraesCS7D03G0176900	0.346123
TraesCS1A03G0634400	TraesCS7D03G0188900	0.330699
TraesCS1A03G0634400	TraesCS7D03G0189100	0.330172
TraesCS1A03G0634400	TraesCS7D03G0357800	0.373558
TraesCS1A03G0634400	TraesCS7D03G0551500	0.345005
TraesCS1A03G0634400	TraesCS7D03G0611800	0.34153
TraesCS1A03G0634400	TraesCS7D03G0759300	0.289289
TraesCS1A03G0634400	TraesCS7D03G0809500	0.345661
TraesCS1A03G0634400	TraesCS7D03G0824300	0.387762
TraesCS1A03G0634400	TraesCS7D03G0984900	0.295161
TraesCS1A03G0634400	TraesCS7D03G1007000	0.33373
TraesCS1A03G0634400	TraesCS7D03G1052900	0.332797
TraesCS1A03G0634400	TraesCS7D03G1105700	0.33311
TraesCS1A03G0634400	TraesCS7D03G1271400	0.367688
TraesCS1A03G0654300	TraesCS1B03G0192900	0.310599
TraesCS1A03G0654300	TraesCS1B03G0693100	0.292447
TraesCS1A03G0654300	TraesCS1B03G0723500	0.296732
TraesCS1A03G0654300	TraesCS2A03G0132800	0.312815
TraesCS1A03G0654300	TraesCS2A03G0337700	0.292457
TraesCS1A03G0654300	TraesCS2B03G0959500	0.315936
TraesCS1A03G0654300	TraesCS2B03G1186800	0.304527
TraesCS1A03G0654300	TraesCS2D03G0361400	0.29279
TraesCS1A03G0654300	TraesCS2D03G1002600	0.288915
TraesCS1A03G0654300	TraesCS3A03G0219400	0.294583
TraesCS1A03G0654300	TraesCS3D03G0166700	0.289699
TraesCS1A03G0654300	TraesCS3D03G0688500	0.292762
TraesCS1A03G0654300	TraesCS4A03G0171400	0.304887
TraesCS1A03G0654300	TraesCS4D03G0130100	0.300925
TraesCS1A03G0654300	TraesCS4D03G0534700	0.294866
TraesCS1A03G0654300	TraesCS5B03G0981700	0.306967
TraesCS1A03G0654300	TraesCS5D03G0133600	0.315003
TraesCS1A03G0654300	TraesCS5D03G0435100	0.299179
TraesCS1A03G0654300	TraesCS7A03G0243900	0.299193
TraesCS1A03G0654300	TraesCS7B03G0170900	0.314063
TraesCS1A03G0654300	TraesCS7D03G1271400	0.292431
TraesCS1A03G0764100	TraesCS1A03G0847000	0.33497
TraesCS1A03G0764100	TraesCS1A03G0968400	0.30506
TraesCS1A03G0764100	TraesCS1B03G0723500	0.320685
TraesCS1A03G0764100	TraesCS1D03G0373000	0.293624
TraesCS1A03G0764100	TraesCS1D03G0602900	0.305388
TraesCS1A03G0764100	TraesCS1D03G0790100	0.302243
TraesCS1A03G0764100	TraesCS2A03G0132800	0.301461
TraesCS1A03G0764100	TraesCS2A03G0239600	0.333106
TraesCS1A03G0764100	TraesCS2A03G0337700	0.297049
TraesCS1A03G0764100	TraesCS2A03G0345600	0.309497
TraesCS1A03G0764100	TraesCS2A03G1000800	0.293276
TraesCS1A03G0764100	TraesCS2A03G1214500	0.292188
TraesCS1A03G0764100	TraesCS2B03G0463700	0.304441
TraesCS1A03G0764100	TraesCS2B03G0959500	0.302764
TraesCS1A03G0764100	TraesCS2B03G1186800	0.316627
TraesCS1A03G0764100	TraesCS2D03G0361400	0.310422
TraesCS1A03G0764100	TraesCS2D03G1002600	0.293317
TraesCS1A03G0764100	TraesCS2D03G1277600	0.308346
TraesCS1A03G0764100	TraesCS3A03G0209200	0.305373
TraesCS1A03G0764100	TraesCS3B03G0642900	0.301513
TraesCS1A03G0764100	TraesCS3B03G1028000	0.291976
TraesCS1A03G0764100	TraesCS3D03G0166700	0.295283
TraesCS1A03G0764100	TraesCS3D03G0688500	0.335334
TraesCS1A03G0764100	TraesCS4A03G0171400	0.320237
TraesCS1A03G0764100	TraesCS4A03G0604400	0.289595
TraesCS1A03G0764100	TraesCS4A03G0681400	0.312875
TraesCS1A03G0764100	TraesCS4A03G1245300	0.296443
TraesCS1A03G0764100	TraesCS4B03G0662400	0.313268
TraesCS1A03G0764100	TraesCS4D03G0050400	0.306245
TraesCS1A03G0764100	TraesCS4D03G0165900	0.300979
TraesCS1A03G0764100	TraesCS4D03G0534700	0.32935
TraesCS1A03G0764100	TraesCS4D03G0657600	0.302006
TraesCS1A03G0764100	TraesCS5A03G1189600	0.29313
TraesCS1A03G0764100	TraesCS5B03G0189200	0.339878
TraesCS1A03G0764100	TraesCS5B03G0798700	0.327847
TraesCS1A03G0764100	TraesCS5B03G0981700	0.309787
TraesCS1A03G0764100	TraesCS5D03G0133600	0.350866
TraesCS1A03G0764100	TraesCS5D03G0444000	0.304592
TraesCS1A03G0764100	TraesCS5D03G1125100	0.322444
TraesCS1A03G0764100	TraesCS6B03G0199900	0.291664
TraesCS1A03G0764100	TraesCS6B03G0234700	0.307391
TraesCS1A03G0764100	TraesCS7A03G0243900	0.295786
TraesCS1A03G0764100	TraesCS7A03G0539000	0.295991
TraesCS1A03G0764100	TraesCS7A03G0610900	0.293242
TraesCS1A03G0788400	TraesCS1D03G0602900	0.307482
TraesCS1A03G0788400	TraesCS7B03G0170900	0.310877
TraesCS1A03G0847000	TraesCS1A03G0788400	0.305307
TraesCS1A03G0847000	TraesCS1A03G0887900	0.297083
TraesCS1A03G0847000	TraesCS1A03G0968400	0.34409
TraesCS1A03G0847000	TraesCS1A03G1003700	0.337394
TraesCS1A03G0847000	TraesCS1A03G1060100	0.34515
TraesCS1A03G0847000	TraesCS1A03G1079100	0.327894
TraesCS1A03G0847000	TraesCS1B03G0192900	0.292757
TraesCS1A03G0847000	TraesCS1B03G0325000	0.33418
TraesCS1A03G0847000	TraesCS1B03G0591800	0.337944
TraesCS1A03G0847000	TraesCS1B03G0649800	0.29169
TraesCS1A03G0847000	TraesCS1B03G0693100	0.324477
TraesCS1A03G0847000	TraesCS1B03G0723500	0.361341
TraesCS1A03G0847000	TraesCS1B03G0772800	0.30033
TraesCS1A03G0847000	TraesCS1B03G1065800	0.323219
TraesCS1A03G0847000	TraesCS1B03G1072800	0.331715
TraesCS1A03G0847000	TraesCS1B03G1184200	0.342659
TraesCS1A03G0847000	TraesCS1B03G1275100	0.294805
TraesCS1A03G0847000	TraesCS1D03G0235300	0.308149
TraesCS1A03G0847000	TraesCS1D03G0373000	0.337435
TraesCS1A03G0847000	TraesCS1D03G0452900	0.338163
TraesCS1A03G0847000	TraesCS1D03G0594600	0.346995
TraesCS1A03G0847000	TraesCS1D03G0602900	0.342271
TraesCS1A03G0847000	TraesCS1D03G0646300	0.333367
TraesCS1A03G0847000	TraesCS1D03G0777800	0.346079
TraesCS1A03G0847000	TraesCS1D03G0790100	0.357026
TraesCS1A03G0847000	TraesCS1D03G0814800	0.332157
TraesCS1A03G0847000	TraesCS1D03G0848000	0.330848
TraesCS1A03G0847000	TraesCS1D03G1020400	0.330218
TraesCS1A03G0847000	TraesCS2A03G0132800	0.352317
TraesCS1A03G0847000	TraesCS2A03G0239600	0.364839
TraesCS1A03G0847000	TraesCS2A03G0337700	0.327868
TraesCS1A03G0847000	TraesCS2A03G0345600	0.340348
TraesCS1A03G0847000	TraesCS2A03G0608600	0.29512
TraesCS1A03G0847000	TraesCS2A03G0649900	0.297174
TraesCS1A03G0847000	TraesCS2A03G0910800	0.295632
TraesCS1A03G0847000	TraesCS2A03G1000800	0.342968
TraesCS1A03G0847000	TraesCS2A03G1166300	0.293969
TraesCS1A03G0847000	TraesCS2A03G1214500	0.346525
TraesCS1A03G0847000	TraesCS2A03G1311600	0.31124
TraesCS1A03G0847000	TraesCS2A03G1334600	0.322835
TraesCS1A03G0847000	TraesCS2B03G0027300	0.327306
TraesCS1A03G0847000	TraesCS2B03G0463700	0.333506
TraesCS1A03G0847000	TraesCS2B03G0503500	0.306889
TraesCS1A03G0847000	TraesCS2B03G0541200	0.313096
TraesCS1A03G0847000	TraesCS2B03G0698600	0.31147
TraesCS1A03G0847000	TraesCS2B03G0886100	0.293924
TraesCS1A03G0847000	TraesCS2B03G0959500	0.356806
TraesCS1A03G0847000	TraesCS2B03G1134900	0.323162
TraesCS1A03G0847000	TraesCS2B03G1186800	0.365915
TraesCS1A03G0847000	TraesCS2B03G1267800	0.332589
TraesCS1A03G0847000	TraesCS2B03G1322200	0.330543
TraesCS1A03G0847000	TraesCS2D03G0196100	0.330052
TraesCS1A03G0847000	TraesCS2D03G0240900	0.32881
TraesCS1A03G0847000	TraesCS2D03G0248000	0.323388
TraesCS1A03G0847000	TraesCS2D03G0355800	0.314727
TraesCS1A03G0847000	TraesCS2D03G0361400	0.331807
TraesCS1A03G0847000	TraesCS2D03G0396200	0.29236
TraesCS1A03G0847000	TraesCS2D03G0467500	0.355768
TraesCS1A03G0847000	TraesCS2D03G0524400	0.339049
TraesCS1A03G0847000	TraesCS2D03G0582100	0.298614
TraesCS1A03G0847000	TraesCS2D03G0619100	0.305744
TraesCS1A03G0847000	TraesCS2D03G0705800	0.314359
TraesCS1A03G0847000	TraesCS2D03G0844800	0.304927
TraesCS1A03G0847000	TraesCS2D03G1002600	0.333246
TraesCS1A03G0847000	TraesCS2D03G1099200	0.306049
TraesCS1A03G0847000	TraesCS2D03G1170700	0.295004
TraesCS1A03G0847000	TraesCS2D03G1277600	0.368711
TraesCS1A03G0847000	TraesCS3A03G0053400	0.323931
TraesCS1A03G0847000	TraesCS3A03G0209200	0.342471
TraesCS1A03G0847000	TraesCS3A03G0219400	0.307927
TraesCS1A03G0847000	TraesCS3A03G0265900	0.304808
TraesCS1A03G0847000	TraesCS3A03G0320700	0.297732
TraesCS1A03G0847000	TraesCS3A03G0371900	0.334312
TraesCS1A03G0847000	TraesCS3A03G0396300	0.329543
TraesCS1A03G0847000	TraesCS3A03G0589100	0.292273
TraesCS1A03G0847000	TraesCS3A03G0694500	0.293414
TraesCS1A03G0847000	TraesCS3A03G0720500	0.297191
TraesCS1A03G0847000	TraesCS3A03G0754500	0.321681
TraesCS1A03G0847000	TraesCS3A03G0790100	0.325033
TraesCS1A03G0847000	TraesCS3A03G0815600	0.302435
TraesCS1A03G0847000	TraesCS3A03G0996200	0.323184
TraesCS1A03G0847000	TraesCS3A03G1028300	0.330931
TraesCS1A03G0847000	TraesCS3A03G1082900	0.320627
TraesCS1A03G0847000	TraesCS3A03G1192100	0.303213
TraesCS1A03G0847000	TraesCS3B03G0353200	0.293055
TraesCS1A03G0847000	TraesCS3B03G0616600	0.332706
TraesCS1A03G0847000	TraesCS3B03G0642900	0.356355
TraesCS1A03G0847000	TraesCS3B03G0669100	0.292116
TraesCS1A03G0847000	TraesCS3B03G0716600	0.295786
TraesCS1A03G0847000	TraesCS3B03G0780600	0.31602
TraesCS1A03G0847000	TraesCS3B03G1028000	0.354469
TraesCS1A03G0847000	TraesCS3B03G1145300	0.322432
TraesCS1A03G0847000	TraesCS3B03G1208500	0.291227
TraesCS1A03G0847000	TraesCS3B03G1211400	0.305177
TraesCS1A03G0847000	TraesCS3B03G1330400	0.339156
TraesCS1A03G0847000	TraesCS3D03G0166700	0.341095
TraesCS1A03G0847000	TraesCS3D03G0529600	0.331107
TraesCS1A03G0847000	TraesCS3D03G0642800	0.310184
TraesCS1A03G0847000	TraesCS3D03G0675000	0.3129
TraesCS1A03G0847000	TraesCS3D03G0688500	0.38181
TraesCS1A03G0847000	TraesCS3D03G0928400	0.299567
TraesCS1A03G0847000	TraesCS3D03G0946400	0.339142
TraesCS1A03G0847000	TraesCS4A03G0002900	0.335404
TraesCS1A03G0847000	TraesCS4A03G0069900	0.297933
TraesCS1A03G0847000	TraesCS4A03G0170100	0.296813
TraesCS1A03G0847000	TraesCS4A03G0171400	0.363418
TraesCS1A03G0847000	TraesCS4A03G0188400	0.330879
TraesCS1A03G0847000	TraesCS4A03G0491700	0.343515
TraesCS1A03G0847000	TraesCS4A03G0533000	0.30329
TraesCS1A03G0847000	TraesCS4A03G0560500	0.326038
TraesCS1A03G0847000	TraesCS4A03G0604400	0.332461
TraesCS1A03G0847000	TraesCS4A03G0621000	0.322085
TraesCS1A03G0847000	TraesCS4A03G0648700	0.303908
TraesCS1A03G0847000	TraesCS4A03G0681400	0.340174
TraesCS1A03G0847000	TraesCS4A03G0744900	0.32031
TraesCS1A03G0847000	TraesCS4A03G0752500	0.338776
TraesCS1A03G0847000	TraesCS4A03G0821500	0.321349
TraesCS1A03G0847000	TraesCS4A03G0963200	0.292489
TraesCS1A03G0847000	TraesCS4A03G1245300	0.353788
TraesCS1A03G0847000	TraesCS4B03G0032400	0.315014
TraesCS1A03G0847000	TraesCS4B03G0080200	0.336303
TraesCS1A03G0847000	TraesCS4B03G0155100	0.32383
TraesCS1A03G0847000	TraesCS4B03G0327300	0.302705
TraesCS1A03G0847000	TraesCS4B03G0662400	0.340808
TraesCS1A03G0847000	TraesCS4B03G0923800	0.335925
TraesCS1A03G0847000	TraesCS4D03G0022700	0.312988
TraesCS1A03G0847000	TraesCS4D03G0030100	0.300228
TraesCS1A03G0847000	TraesCS4D03G0050400	0.341135
TraesCS1A03G0847000	TraesCS4D03G0088000	0.296025
TraesCS1A03G0847000	TraesCS4D03G0156100	0.328544
TraesCS1A03G0847000	TraesCS4D03G0165900	0.338812
TraesCS1A03G0847000	TraesCS4D03G0522100	0.321975
TraesCS1A03G0847000	TraesCS4D03G0534700	0.36284
TraesCS1A03G0847000	TraesCS4D03G0657600	0.367529
TraesCS1A03G0847000	TraesCS4D03G0810100	0.296913
TraesCS1A03G0847000	TraesCS4D03G0833000	0.343547
TraesCS1A03G0847000	TraesCS4D03G0841400	0.325064
TraesCS1A03G0847000	TraesCS5A03G0112400	0.291691
TraesCS1A03G0847000	TraesCS5A03G0113700	0.32143
TraesCS1A03G0847000	TraesCS5A03G0368300	0.317418
TraesCS1A03G0847000	TraesCS5A03G0410400	0.319808
TraesCS1A03G0847000	TraesCS5A03G0471800	0.316102
TraesCS1A03G0847000	TraesCS5A03G0931300	0.310152
TraesCS1A03G0847000	TraesCS5A03G1018800	0.319423
TraesCS1A03G0847000	TraesCS5A03G1140600	0.30666
TraesCS1A03G0847000	TraesCS5A03G1162700	0.339495
TraesCS1A03G0847000	TraesCS5A03G1189600	0.344987
TraesCS1A03G0847000	TraesCS5A03G1220100	0.299771
TraesCS1A03G0847000	TraesCS5A03G1279700	0.314804
TraesCS1A03G0847000	TraesCS5A03G1280400	0.303217
TraesCS1A03G0847000	TraesCS5B03G0127200	0.334472
TraesCS1A03G0847000	TraesCS5B03G0189200	0.348798
TraesCS1A03G0847000	TraesCS5B03G0189300	0.327242
TraesCS1A03G0847000	TraesCS5B03G0256900	0.325628
TraesCS1A03G0847000	TraesCS5B03G0407400	0.306614
TraesCS1A03G0847000	TraesCS5B03G0509600	0.328344
TraesCS1A03G0847000	TraesCS5B03G0520000	0.292277
TraesCS1A03G0847000	TraesCS5B03G0598300	0.323794
TraesCS1A03G0847000	TraesCS5B03G0798700	0.337737
TraesCS1A03G0847000	TraesCS5B03G0981700	0.344745
TraesCS1A03G0847000	TraesCS5B03G1049400	0.326888
TraesCS1A03G0847000	TraesCS5B03G1066300	0.295741
TraesCS1A03G0847000	TraesCS5B03G1140700	0.289479
TraesCS1A03G0847000	TraesCS5B03G1219100	0.312172
TraesCS1A03G0847000	TraesCS5B03G1355600	0.308825
TraesCS1A03G0847000	TraesCS5D03G0133600	0.373026
TraesCS1A03G0847000	TraesCS5D03G0163800	0.310604
TraesCS1A03G0847000	TraesCS5D03G0221900	0.294007
TraesCS1A03G0847000	TraesCS5D03G0245800	0.324439
TraesCS1A03G0847000	TraesCS5D03G0344400	0.299332
TraesCS1A03G0847000	TraesCS5D03G0361600	0.322793
TraesCS1A03G0847000	TraesCS5D03G0444000	0.346011
TraesCS1A03G0847000	TraesCS5D03G0479000	0.300415
TraesCS1A03G0847000	TraesCS5D03G0500400	0.321661
TraesCS1A03G0847000	TraesCS5D03G0723700	0.322382
TraesCS1A03G0847000	TraesCS5D03G0838200	0.307228
TraesCS1A03G0847000	TraesCS5D03G0878400	0.297242
TraesCS1A03G0847000	TraesCS5D03G0890100	0.319022
TraesCS1A03G0847000	TraesCS5D03G0893700	0.322778
TraesCS1A03G0847000	TraesCS5D03G0979300	0.351422
TraesCS1A03G0847000	TraesCS5D03G1125100	0.35115
TraesCS1A03G0847000	TraesCS6B03G0179100	0.30364
TraesCS1A03G0847000	TraesCS6B03G0199900	0.331957
TraesCS1A03G0847000	TraesCS6B03G0234700	0.340335
TraesCS1A03G0847000	TraesCS6B03G0722300	0.312153
TraesCS1A03G0847000	TraesCS6B03G0824200	0.308636
TraesCS1A03G0847000	TraesCS6B03G0929100	0.332196
TraesCS1A03G0847000	TraesCS6B03G1088900	0.319529
TraesCS1A03G0847000	TraesCS6D03G0043600	0.35763
TraesCS1A03G0847000	TraesCS6D03G0306800	0.314284
TraesCS1A03G0847000	TraesCS6D03G0809600	0.318433
TraesCS1A03G0847000	TraesCS7A03G0243900	0.318424
TraesCS1A03G0847000	TraesCS7A03G0292200	0.31807
TraesCS1A03G0847000	TraesCS7A03G0373600	0.311523
TraesCS1A03G0847000	TraesCS7A03G0492900	0.322801
TraesCS1A03G0847000	TraesCS7A03G0539000	0.347395
TraesCS1A03G0847000	TraesCS7A03G0548700	0.29255
TraesCS1A03G0847000	TraesCS7A03G0610900	0.334588
TraesCS1A03G0847000	TraesCS7A03G0824800	0.324995
TraesCS1A03G0847000	TraesCS7A03G0868600	0.290559
TraesCS1A03G0847000	TraesCS7A03G1057000	0.326508
TraesCS1A03G0847000	TraesCS7A03G1134500	0.33388
TraesCS1A03G0847000	TraesCS7A03G1223100	0.290347
TraesCS1A03G0847000	TraesCS7A03G1267400	0.346656
TraesCS1A03G0847000	TraesCS7A03G1336800	0.332273
TraesCS1A03G0847000	TraesCS7B03G0003100	0.34495
TraesCS1A03G0847000	TraesCS7B03G0053800	0.33189
TraesCS1A03G0847000	TraesCS7B03G0075400	0.343121
TraesCS1A03G0847000	TraesCS7B03G0170900	0.297531
TraesCS1A03G0847000	TraesCS7B03G0306700	0.346463
TraesCS1A03G0847000	TraesCS7B03G0306900	0.339615
TraesCS1A03G0847000	TraesCS7B03G0393800	0.336065
TraesCS1A03G0847000	TraesCS7B03G0698500	0.311887
TraesCS1A03G0847000	TraesCS7B03G0780600	0.336533
TraesCS1A03G0847000	TraesCS7B03G1087800	0.30956
TraesCS1A03G0847000	TraesCS7B03G1178300	0.348072
TraesCS1A03G0847000	TraesCS7D03G0176900	0.33829
TraesCS1A03G0847000	TraesCS7D03G0189100	0.306056
TraesCS1A03G0847000	TraesCS7D03G0357800	0.33786
TraesCS1A03G0847000	TraesCS7D03G0551500	0.322485
TraesCS1A03G0847000	TraesCS7D03G0611800	0.31296
TraesCS1A03G0847000	TraesCS7D03G0824300	0.329254
TraesCS1A03G0847000	TraesCS7D03G1007000	0.328381
TraesCS1A03G0847000	TraesCS7D03G1052900	0.319174
TraesCS1A03G0847000	TraesCS7D03G1105700	0.297951
TraesCS1A03G0847000	TraesCS7D03G1271400	0.325414
TraesCS1A03G0887900	TraesCS1B03G0723500	0.313952
TraesCS1A03G0887900	TraesCS1D03G0594600	0.298162
TraesCS1A03G0887900	TraesCS1D03G0602900	0.302358
TraesCS1A03G0887900	TraesCS1D03G0777800	0.296778
TraesCS1A03G0887900	TraesCS1D03G0790100	0.324457
TraesCS1A03G0887900	TraesCS2A03G0132800	0.322925
TraesCS1A03G0887900	TraesCS2A03G0239600	0.327371
TraesCS1A03G0887900	TraesCS2A03G1000800	0.318598
TraesCS1A03G0887900	TraesCS2A03G1214500	0.329378
TraesCS1A03G0887900	TraesCS2B03G0463700	0.293566
TraesCS1A03G0887900	TraesCS2B03G0959500	0.322417
TraesCS1A03G0887900	TraesCS2B03G1186800	0.30968
TraesCS1A03G0887900	TraesCS2D03G0196100	0.305235
TraesCS1A03G0887900	TraesCS2D03G0248000	0.297293
TraesCS1A03G0887900	TraesCS2D03G0467500	0.294787
TraesCS1A03G0887900	TraesCS3A03G0371900	0.290402
TraesCS1A03G0887900	TraesCS3D03G0166700	0.304674
TraesCS1A03G0887900	TraesCS3D03G0529600	0.297526
TraesCS1A03G0887900	TraesCS3D03G0688500	0.339595
TraesCS1A03G0887900	TraesCS4A03G0171400	0.323278
TraesCS1A03G0887900	TraesCS4D03G0534700	0.337123
TraesCS1A03G0887900	TraesCS4D03G0657600	0.313049
TraesCS1A03G0887900	TraesCS4D03G0833000	0.296299
TraesCS1A03G0887900	TraesCS5A03G0471800	0.294782
TraesCS1A03G0887900	TraesCS5A03G0931300	0.290477
TraesCS1A03G0887900	TraesCS5B03G0189200	0.292543
TraesCS1A03G0887900	TraesCS5B03G0798700	0.290402
TraesCS1A03G0887900	TraesCS5B03G0981700	0.332237
TraesCS1A03G0887900	TraesCS5D03G0133600	0.334623
TraesCS1A03G0887900	TraesCS5D03G0361600	0.289771
TraesCS1A03G0887900	TraesCS5D03G0890100	0.292231
TraesCS1A03G0887900	TraesCS6D03G0043600	0.29849
TraesCS1A03G0887900	TraesCS7A03G0243900	0.291691
TraesCS1A03G0887900	TraesCS7A03G0492900	0.289796
TraesCS1A03G0887900	TraesCS7A03G0539000	0.314886
TraesCS1A03G0887900	TraesCS7B03G1178300	0.298315
TraesCS1A03G0887900	TraesCS7D03G0611800	0.290982
TraesCS1A03G0887900	TraesCS7D03G1271400	0.30881
TraesCS1A03G0968400	TraesCS1A03G1003700	0.341382
TraesCS1A03G0968400	TraesCS1A03G1060100	0.321559
TraesCS1A03G0968400	TraesCS1A03G1079100	0.294087
TraesCS1A03G0968400	TraesCS1B03G0325000	0.302415
TraesCS1A03G0968400	TraesCS1B03G0591800	0.340647
TraesCS1A03G0968400	TraesCS1B03G0649800	0.2914
TraesCS1A03G0968400	TraesCS1B03G0693100	0.294693
TraesCS1A03G0968400	TraesCS1B03G0723500	0.336417
TraesCS1A03G0968400	TraesCS1B03G0796800	0.289513
TraesCS1A03G0968400	TraesCS1B03G1065800	0.325561
TraesCS1A03G0968400	TraesCS1B03G1072800	0.345183
TraesCS1A03G0968400	TraesCS1B03G1184200	0.341246
TraesCS1A03G0968400	TraesCS1D03G0373000	0.319535
TraesCS1A03G0968400	TraesCS1D03G0452900	0.339381
TraesCS1A03G0968400	TraesCS1D03G0594600	0.336342
TraesCS1A03G0968400	TraesCS1D03G0602900	0.321374
TraesCS1A03G0968400	TraesCS1D03G0646300	0.31859
TraesCS1A03G0968400	TraesCS1D03G0777800	0.335969
TraesCS1A03G0968400	TraesCS1D03G0790100	0.343525
TraesCS1A03G0968400	TraesCS1D03G0814800	0.308088
TraesCS1A03G0968400	TraesCS1D03G0848000	0.310009
TraesCS1A03G0968400	TraesCS1D03G1020400	0.291313
TraesCS1A03G0968400	TraesCS2A03G0132800	0.327928
TraesCS1A03G0968400	TraesCS2A03G0239600	0.353111
TraesCS1A03G0968400	TraesCS2A03G0337700	0.29425
TraesCS1A03G0968400	TraesCS2A03G0345600	0.335708
TraesCS1A03G0968400	TraesCS2A03G1000800	0.337034
TraesCS1A03G0968400	TraesCS2A03G1214500	0.349281
TraesCS1A03G0968400	TraesCS2A03G1334600	0.318642
TraesCS1A03G0968400	TraesCS2B03G0027300	0.334428
TraesCS1A03G0968400	TraesCS2B03G0463700	0.311627
TraesCS1A03G0968400	TraesCS2B03G0541200	0.324789
TraesCS1A03G0968400	TraesCS2B03G0959500	0.330662
TraesCS1A03G0968400	TraesCS2B03G1134900	0.307484
TraesCS1A03G0968400	TraesCS2B03G1186800	0.347882
TraesCS1A03G0968400	TraesCS2B03G1267800	0.324608
TraesCS1A03G0968400	TraesCS2B03G1322200	0.331214
TraesCS1A03G0968400	TraesCS2D03G0196100	0.315763
TraesCS1A03G0968400	TraesCS2D03G0240900	0.31672
TraesCS1A03G0968400	TraesCS2D03G0248000	0.330347
TraesCS1A03G0968400	TraesCS2D03G0361400	0.303259
TraesCS1A03G0968400	TraesCS2D03G0467500	0.349604
TraesCS1A03G0968400	TraesCS2D03G0524400	0.342726
TraesCS1A03G0968400	TraesCS2D03G0705800	0.315615
TraesCS1A03G0968400	TraesCS2D03G0844800	0.305585
TraesCS1A03G0968400	TraesCS2D03G1002600	0.308045
TraesCS1A03G0968400	TraesCS2D03G1277600	0.358732
TraesCS1A03G0968400	TraesCS3A03G0053400	0.321994
TraesCS1A03G0968400	TraesCS3A03G0209200	0.325367
TraesCS1A03G0968400	TraesCS3A03G0219400	0.297633
TraesCS1A03G0968400	TraesCS3A03G0371900	0.313726
TraesCS1A03G0968400	TraesCS3A03G0396300	0.321888
TraesCS1A03G0968400	TraesCS3A03G0694500	0.28946
TraesCS1A03G0968400	TraesCS3A03G0754500	0.319894
TraesCS1A03G0968400	TraesCS3A03G0790100	0.318791
TraesCS1A03G0968400	TraesCS3A03G0996200	0.323213
TraesCS1A03G0968400	TraesCS3A03G1028300	0.308838
TraesCS1A03G0968400	TraesCS3A03G1082900	0.311533
TraesCS1A03G0968400	TraesCS3B03G0616600	0.320232
TraesCS1A03G0968400	TraesCS3B03G0642900	0.327912
TraesCS1A03G0968400	TraesCS3B03G0669100	0.289658
TraesCS1A03G0968400	TraesCS3B03G0780600	0.304138
TraesCS1A03G0968400	TraesCS3B03G1028000	0.331097
TraesCS1A03G0968400	TraesCS3B03G1145300	0.31855
TraesCS1A03G0968400	TraesCS3B03G1330400	0.341348
TraesCS1A03G0968400	TraesCS3D03G0166700	0.315796
TraesCS1A03G0968400	TraesCS3D03G0529600	0.31096
TraesCS1A03G0968400	TraesCS3D03G0642800	0.309848
TraesCS1A03G0968400	TraesCS3D03G0675000	0.316569
TraesCS1A03G0968400	TraesCS3D03G0688500	0.36094
TraesCS1A03G0968400	TraesCS3D03G0928400	0.297333
TraesCS1A03G0968400	TraesCS3D03G0946400	0.322381
TraesCS1A03G0968400	TraesCS4A03G0002900	0.326075
TraesCS1A03G0968400	TraesCS4A03G0170100	0.290049
TraesCS1A03G0968400	TraesCS4A03G0171400	0.340955
TraesCS1A03G0968400	TraesCS4A03G0188400	0.300858
TraesCS1A03G0968400	TraesCS4A03G0491700	0.340378
TraesCS1A03G0968400	TraesCS4A03G0560500	0.321595
TraesCS1A03G0968400	TraesCS4A03G0604400	0.324967
TraesCS1A03G0968400	TraesCS4A03G0621000	0.316264
TraesCS1A03G0968400	TraesCS4A03G0681400	0.311634
TraesCS1A03G0968400	TraesCS4A03G0744900	0.317341
TraesCS1A03G0968400	TraesCS4A03G0752500	0.316832
TraesCS1A03G0968400	TraesCS4A03G0821500	0.3077
TraesCS1A03G0968400	TraesCS4A03G1245300	0.337878
TraesCS1A03G0968400	TraesCS4B03G0032400	0.291118
TraesCS1A03G0968400	TraesCS4B03G0080200	0.338896
TraesCS1A03G0968400	TraesCS4B03G0155100	0.292083
TraesCS1A03G0968400	TraesCS4B03G0327300	0.2927
TraesCS1A03G0968400	TraesCS4B03G0662400	0.341185
TraesCS1A03G0968400	TraesCS4B03G0923800	0.337169
TraesCS1A03G0968400	TraesCS4D03G0022700	0.297299
TraesCS1A03G0968400	TraesCS4D03G0050400	0.340099
TraesCS1A03G0968400	TraesCS4D03G0156100	0.328768
TraesCS1A03G0968400	TraesCS4D03G0165900	0.3263
TraesCS1A03G0968400	TraesCS4D03G0534700	0.346558
TraesCS1A03G0968400	TraesCS4D03G0657600	0.351497
TraesCS1A03G0968400	TraesCS4D03G0810100	0.291122
TraesCS1A03G0968400	TraesCS4D03G0833000	0.331084
TraesCS1A03G0968400	TraesCS4D03G0841400	0.323572
TraesCS1A03G0968400	TraesCS5A03G0368300	0.327376
TraesCS1A03G0968400	TraesCS5A03G0410400	0.297361
TraesCS1A03G0968400	TraesCS5A03G0471800	0.304166
TraesCS1A03G0968400	TraesCS5A03G1018800	0.29369
TraesCS1A03G0968400	TraesCS5A03G1162700	0.305516
TraesCS1A03G0968400	TraesCS5A03G1189600	0.314019
TraesCS1A03G0968400	TraesCS5A03G1280400	0.299265
TraesCS1A03G0968400	TraesCS5B03G0127200	0.326394
TraesCS1A03G0968400	TraesCS5B03G0189200	0.331892
TraesCS1A03G0968400	TraesCS5B03G0189300	0.334772
TraesCS1A03G0968400	TraesCS5B03G0256900	0.308564
TraesCS1A03G0968400	TraesCS5B03G0407400	0.29467
TraesCS1A03G0968400	TraesCS5B03G0509600	0.319231
TraesCS1A03G0968400	TraesCS5B03G0520000	0.29663
TraesCS1A03G0968400	TraesCS5B03G0598300	0.323733
TraesCS1A03G0968400	TraesCS5B03G0798700	0.312234
TraesCS1A03G0968400	TraesCS5B03G0981700	0.330448
TraesCS1A03G0968400	TraesCS5B03G1049400	0.305551
TraesCS1A03G0968400	TraesCS5B03G1219100	0.31916
TraesCS1A03G0968400	TraesCS5D03G0133600	0.354239
TraesCS1A03G0968400	TraesCS5D03G0163800	0.314663
TraesCS1A03G0968400	TraesCS5D03G0245800	0.311695
TraesCS1A03G0968400	TraesCS5D03G0344400	0.296204
TraesCS1A03G0968400	TraesCS5D03G0361600	0.30125
TraesCS1A03G0968400	TraesCS5D03G0444000	0.333631
TraesCS1A03G0968400	TraesCS5D03G0479000	0.300828
TraesCS1A03G0968400	TraesCS5D03G0500400	0.317621
TraesCS1A03G0968400	TraesCS5D03G0723700	0.291372
TraesCS1A03G0968400	TraesCS5D03G0838200	0.298365
TraesCS1A03G0968400	TraesCS5D03G0890100	0.302193
TraesCS1A03G0968400	TraesCS5D03G0893700	0.313577
TraesCS1A03G0968400	TraesCS5D03G0979300	0.338991
TraesCS1A03G0968400	TraesCS5D03G1125100	0.345179
TraesCS1A03G0968400	TraesCS6B03G0179100	0.295615
TraesCS1A03G0968400	TraesCS6B03G0199900	0.310757
TraesCS1A03G0968400	TraesCS6B03G0234700	0.324109
TraesCS1A03G0968400	TraesCS6B03G0824200	0.299575
TraesCS1A03G0968400	TraesCS6B03G0929100	0.337365
TraesCS1A03G0968400	TraesCS6D03G0043600	0.359897
TraesCS1A03G0968400	TraesCS6D03G0306800	0.302494
TraesCS1A03G0968400	TraesCS6D03G0809600	0.303888
TraesCS1A03G0968400	TraesCS7A03G0243900	0.292109
TraesCS1A03G0968400	TraesCS7A03G0292200	0.311696
TraesCS1A03G0968400	TraesCS7A03G0373600	0.296383
TraesCS1A03G0968400	TraesCS7A03G0492900	0.298681
TraesCS1A03G0968400	TraesCS7A03G0539000	0.358837
TraesCS1A03G0968400	TraesCS7A03G0610900	0.339884
TraesCS1A03G0968400	TraesCS7A03G0824800	0.316326
TraesCS1A03G0968400	TraesCS7A03G1057000	0.291056
TraesCS1A03G0968400	TraesCS7A03G1134500	0.323497
TraesCS1A03G0968400	TraesCS7A03G1267400	0.316181
TraesCS1A03G0968400	TraesCS7A03G1336800	0.337509
TraesCS1A03G0968400	TraesCS7B03G0003100	0.340292
TraesCS1A03G0968400	TraesCS7B03G0053800	0.327164
TraesCS1A03G0968400	TraesCS7B03G0075400	0.317447
TraesCS1A03G0968400	TraesCS7B03G0306700	0.316997
TraesCS1A03G0968400	TraesCS7B03G0306900	0.339975
TraesCS1A03G0968400	TraesCS7B03G0393800	0.334769
TraesCS1A03G0968400	TraesCS7B03G0780600	0.318817
TraesCS1A03G0968400	TraesCS7B03G1178300	0.322207
TraesCS1A03G0968400	TraesCS7D03G0176900	0.329348
TraesCS1A03G0968400	TraesCS7D03G0357800	0.308916
TraesCS1A03G0968400	TraesCS7D03G0551500	0.329807
TraesCS1A03G0968400	TraesCS7D03G0611800	0.300182
TraesCS1A03G0968400	TraesCS7D03G0809500	0.289219
TraesCS1A03G0968400	TraesCS7D03G0824300	0.295685
TraesCS1A03G0968400	TraesCS7D03G1007000	0.318142
TraesCS1A03G0968400	TraesCS7D03G1052900	0.323524
TraesCS1A03G0968400	TraesCS7D03G1271400	0.304906
TraesCS1A03G1003700	TraesCS1B03G0723500	0.296774
TraesCS1A03G1003700	TraesCS1B03G1072800	0.299799
TraesCS1A03G1003700	TraesCS1D03G0452900	0.336916
TraesCS1A03G1003700	TraesCS1D03G0594600	0.313131
TraesCS1A03G1003700	TraesCS1D03G0602900	0.294528
TraesCS1A03G1003700	TraesCS1D03G0777800	0.317236
TraesCS1A03G1003700	TraesCS1D03G0790100	0.315408
TraesCS1A03G1003700	TraesCS2A03G0239600	0.349334
TraesCS1A03G1003700	TraesCS2A03G0345600	0.335422
TraesCS1A03G1003700	TraesCS2A03G1000800	0.314116
TraesCS1A03G1003700	TraesCS2A03G1214500	0.334017
TraesCS1A03G1003700	TraesCS2B03G0027300	0.292776
TraesCS1A03G1003700	TraesCS2B03G0463700	0.291418
TraesCS1A03G1003700	TraesCS2B03G0541200	0.321527
TraesCS1A03G1003700	TraesCS2B03G1186800	0.303793
TraesCS1A03G1003700	TraesCS2D03G0248000	0.336369
TraesCS1A03G1003700	TraesCS2D03G0524400	0.330646
TraesCS1A03G1003700	TraesCS2D03G1277600	0.299993
TraesCS1A03G1003700	TraesCS3A03G0053400	0.304909
TraesCS1A03G1003700	TraesCS3A03G0790100	0.29703
TraesCS1A03G1003700	TraesCS3A03G0996200	0.296549
TraesCS1A03G1003700	TraesCS3B03G1028000	0.289389
TraesCS1A03G1003700	TraesCS3B03G1330400	0.301395
TraesCS1A03G1003700	TraesCS3D03G0688500	0.342711
TraesCS1A03G1003700	TraesCS4A03G0171400	0.313081
TraesCS1A03G1003700	TraesCS4A03G0491700	0.337021
TraesCS1A03G1003700	TraesCS4A03G0604400	0.323282
TraesCS1A03G1003700	TraesCS4A03G0752500	0.295085
TraesCS1A03G1003700	TraesCS4B03G0080200	0.327483
TraesCS1A03G1003700	TraesCS4B03G0662400	0.343766
TraesCS1A03G1003700	TraesCS4B03G0923800	0.305565
TraesCS1A03G1003700	TraesCS4D03G0050400	0.30306
TraesCS1A03G1003700	TraesCS4D03G0156100	0.29502
TraesCS1A03G1003700	TraesCS4D03G0165900	0.306645
TraesCS1A03G1003700	TraesCS4D03G0534700	0.329576
TraesCS1A03G1003700	TraesCS4D03G0657600	0.316497
TraesCS1A03G1003700	TraesCS4D03G0833000	0.307548
TraesCS1A03G1003700	TraesCS5B03G0189200	0.316946
TraesCS1A03G1003700	TraesCS5B03G0981700	0.313217
TraesCS1A03G1003700	TraesCS5D03G0133600	0.332773
TraesCS1A03G1003700	TraesCS5D03G0444000	0.327087
TraesCS1A03G1003700	TraesCS5D03G0500400	0.294393
TraesCS1A03G1003700	TraesCS5D03G0979300	0.294347
TraesCS1A03G1003700	TraesCS5D03G1125100	0.311896
TraesCS1A03G1003700	TraesCS6B03G0234700	0.292471
TraesCS1A03G1003700	TraesCS6D03G0043600	0.318919
TraesCS1A03G1003700	TraesCS7A03G0292200	0.293931
TraesCS1A03G1003700	TraesCS7A03G0539000	0.341895
TraesCS1A03G1003700	TraesCS7A03G0610900	0.295471
TraesCS1A03G1003700	TraesCS7A03G1134500	0.293196
TraesCS1A03G1003700	TraesCS7B03G0003100	0.326399
TraesCS1A03G1003700	TraesCS7B03G0053800	0.319919
TraesCS1A03G1003700	TraesCS7B03G0393800	0.337049
TraesCS1A03G1003700	TraesCS7D03G0176900	0.289667
TraesCS1A03G1003700	TraesCS7D03G0551500	0.319617
TraesCS1A03G1022200	TraesCS2B03G0463700	0.301585
TraesCS1A03G1022200	TraesCS4B03G0032400	0.298111
TraesCS1A03G1039400	TraesCS1B03G0693100	0.342298
TraesCS1A03G1039400	TraesCS1B03G1275100	0.292824
TraesCS1A03G1039400	TraesCS1D03G0790100	0.312881
TraesCS1A03G1039400	TraesCS2A03G0132800	0.315573
TraesCS1A03G1039400	TraesCS2A03G0239600	0.29285
TraesCS1A03G1039400	TraesCS2A03G0873900	0.300517
TraesCS1A03G1039400	TraesCS2A03G1000800	0.313171
TraesCS1A03G1039400	TraesCS2B03G0463700	0.306613
TraesCS1A03G1039400	TraesCS2B03G1186800	0.305446
TraesCS1A03G1039400	TraesCS3A03G0219400	0.288943
TraesCS1A03G1039400	TraesCS3A03G0996200	0.293933
TraesCS1A03G1039400	TraesCS3B03G0642900	0.307257
TraesCS1A03G1039400	TraesCS3D03G0688500	0.31691
TraesCS1A03G1039400	TraesCS4A03G0171400	0.328641
TraesCS1A03G1039400	TraesCS4A03G0533000	0.301018
TraesCS1A03G1039400	TraesCS4A03G0752500	0.314249
TraesCS1A03G1039400	TraesCS4B03G0032400	0.300523
TraesCS1A03G1039400	TraesCS4D03G0534700	0.308464
TraesCS1A03G1039400	TraesCS5B03G0981700	0.331161
TraesCS1A03G1039400	TraesCS5B03G1049400	0.304198
TraesCS1A03G1039400	TraesCS5D03G0133600	0.318587
TraesCS1A03G1039400	TraesCS5D03G0361600	0.327409
TraesCS1A03G1039400	TraesCS5D03G0890100	0.299814
TraesCS1A03G1039400	TraesCS7A03G0292200	0.299924
TraesCS1A03G1039400	TraesCS7A03G0492900	0.291815
TraesCS1A03G1039400	TraesCS7B03G0698500	0.31971
TraesCS1A03G1039400	TraesCS7B03G1087800	0.289334
TraesCS1A03G1039400	TraesCS7D03G0824300	0.297259
TraesCS1A03G1039400	TraesCS7D03G1271400	0.310173
TraesCS1A03G1060100	TraesCS1A03G0782200	0.345023
TraesCS1A03G1060100	TraesCS1A03G0788400	0.315717
TraesCS1A03G1060100	TraesCS1A03G1079100	0.350913
TraesCS1A03G1060100	TraesCS1B03G0192900	0.304468
TraesCS1A03G1060100	TraesCS1B03G0325000	0.318583
TraesCS1A03G1060100	TraesCS1B03G0693100	0.348779
TraesCS1A03G1060100	TraesCS1B03G0723500	0.359826
TraesCS1A03G1060100	TraesCS1B03G0772800	0.336949
TraesCS1A03G1060100	TraesCS1B03G1065800	0.298792
TraesCS1A03G1060100	TraesCS1B03G1072800	0.301606
TraesCS1A03G1060100	TraesCS1D03G0373000	0.361704
TraesCS1A03G1060100	TraesCS1D03G0452900	0.336686
TraesCS1A03G1060100	TraesCS1D03G0547500	0.294911
TraesCS1A03G1060100	TraesCS1D03G0594600	0.306143
TraesCS1A03G1060100	TraesCS1D03G0602900	0.322098
TraesCS1A03G1060100	TraesCS1D03G0777800	0.306275
TraesCS1A03G1060100	TraesCS1D03G0790100	0.347043
TraesCS1A03G1060100	TraesCS1D03G0814800	0.296883
TraesCS1A03G1060100	TraesCS1D03G1020400	0.295987
TraesCS1A03G1060100	TraesCS2A03G0087200	0.299344
TraesCS1A03G1060100	TraesCS2A03G0132800	0.363142
TraesCS1A03G1060100	TraesCS2A03G0239600	0.349668
TraesCS1A03G1060100	TraesCS2A03G0337700	0.319363
TraesCS1A03G1060100	TraesCS2A03G0345600	0.337597
TraesCS1A03G1060100	TraesCS2A03G0608600	0.326363
TraesCS1A03G1060100	TraesCS2A03G0649900	0.370246
TraesCS1A03G1060100	TraesCS2A03G0873900	0.31068
TraesCS1A03G1060100	TraesCS2A03G0930300	0.348205
TraesCS1A03G1060100	TraesCS2A03G1000800	0.328729
TraesCS1A03G1060100	TraesCS2A03G1166300	0.362894
TraesCS1A03G1060100	TraesCS2A03G1214500	0.314341
TraesCS1A03G1060100	TraesCS2A03G1311600	0.339617
TraesCS1A03G1060100	TraesCS2B03G0463700	0.330036
TraesCS1A03G1060100	TraesCS2B03G0503500	0.295169
TraesCS1A03G1060100	TraesCS2B03G0541200	0.324236
TraesCS1A03G1060100	TraesCS2B03G0698600	0.349874
TraesCS1A03G1060100	TraesCS2B03G0959500	0.349036
TraesCS1A03G1060100	TraesCS2B03G1047500	0.312233
TraesCS1A03G1060100	TraesCS2B03G1186800	0.378142
TraesCS1A03G1060100	TraesCS2B03G1322200	0.348938
TraesCS1A03G1060100	TraesCS2D03G0019400	0.305102
TraesCS1A03G1060100	TraesCS2D03G0196100	0.312204
TraesCS1A03G1060100	TraesCS2D03G0240900	0.305685
TraesCS1A03G1060100	TraesCS2D03G0248000	0.302543
TraesCS1A03G1060100	TraesCS2D03G0355800	0.300025
TraesCS1A03G1060100	TraesCS2D03G0361400	0.321918
TraesCS1A03G1060100	TraesCS2D03G0467500	0.328391
TraesCS1A03G1060100	TraesCS2D03G0467800	0.311549
TraesCS1A03G1060100	TraesCS2D03G0524400	0.313672
TraesCS1A03G1060100	TraesCS2D03G0619100	0.306057
TraesCS1A03G1060100	TraesCS2D03G1002600	0.349892
TraesCS1A03G1060100	TraesCS2D03G1099200	0.295891
TraesCS1A03G1060100	TraesCS2D03G1134400	0.296123
TraesCS1A03G1060100	TraesCS2D03G1170700	0.30137
TraesCS1A03G1060100	TraesCS2D03G1277600	0.372688
TraesCS1A03G1060100	TraesCS3A03G0053400	0.316924
TraesCS1A03G1060100	TraesCS3A03G0184200	0.359883
TraesCS1A03G1060100	TraesCS3A03G0209200	0.337095
TraesCS1A03G1060100	TraesCS3A03G0219400	0.30491
TraesCS1A03G1060100	TraesCS3A03G0265900	0.342639
TraesCS1A03G1060100	TraesCS3A03G0371900	0.338029
TraesCS1A03G1060100	TraesCS3A03G0396300	0.299483
TraesCS1A03G1060100	TraesCS3A03G0694500	0.326151
TraesCS1A03G1060100	TraesCS3A03G0720500	0.365761
TraesCS1A03G1060100	TraesCS3A03G0754500	0.316357
TraesCS1A03G1060100	TraesCS3A03G0790100	0.320904
TraesCS1A03G1060100	TraesCS3A03G0815600	0.344813
TraesCS1A03G1060100	TraesCS3A03G0943600	0.322887
TraesCS1A03G1060100	TraesCS3A03G0996200	0.309065
TraesCS1A03G1060100	TraesCS3A03G1082900	0.342232
TraesCS1A03G1060100	TraesCS3A03G1192100	0.356407
TraesCS1A03G1060100	TraesCS3B03G0397500	0.364764
TraesCS1A03G1060100	TraesCS3B03G0616600	0.356928
TraesCS1A03G1060100	TraesCS3B03G0642900	0.378092
TraesCS1A03G1060100	TraesCS3B03G0669100	0.300956
TraesCS1A03G1060100	TraesCS3B03G0780600	0.308479
TraesCS1A03G1060100	TraesCS3B03G1017600	0.37308
TraesCS1A03G1060100	TraesCS3B03G1028000	0.37652
TraesCS1A03G1060100	TraesCS3B03G1106800	0.316199
TraesCS1A03G1060100	TraesCS3B03G1145300	0.342092
TraesCS1A03G1060100	TraesCS3B03G1196000	0.317225
TraesCS1A03G1060100	TraesCS3B03G1208500	0.333859
TraesCS1A03G1060100	TraesCS3B03G1211400	0.334622
TraesCS1A03G1060100	TraesCS3B03G1330400	0.33373
TraesCS1A03G1060100	TraesCS3D03G0166700	0.30854
TraesCS1A03G1060100	TraesCS3D03G0529600	0.323487
TraesCS1A03G1060100	TraesCS3D03G0688500	0.377584
TraesCS1A03G1060100	TraesCS3D03G0811100	0.300903
TraesCS1A03G1060100	TraesCS3D03G0928400	0.320605
TraesCS1A03G1060100	TraesCS3D03G0946400	0.29373
TraesCS1A03G1060100	TraesCS4A03G0069900	0.32329
TraesCS1A03G1060100	TraesCS4A03G0083100	0.34011
TraesCS1A03G1060100	TraesCS4A03G0171400	0.374817
TraesCS1A03G1060100	TraesCS4A03G0188400	0.322142
TraesCS1A03G1060100	TraesCS4A03G0491700	0.334848
TraesCS1A03G1060100	TraesCS4A03G0533000	0.303688
TraesCS1A03G1060100	TraesCS4A03G0604400	0.343159
TraesCS1A03G1060100	TraesCS4A03G0621000	0.312918
TraesCS1A03G1060100	TraesCS4A03G0648700	0.290356
TraesCS1A03G1060100	TraesCS4A03G0681400	0.34556
TraesCS1A03G1060100	TraesCS4A03G0744900	0.295627
TraesCS1A03G1060100	TraesCS4A03G0752500	0.347885
TraesCS1A03G1060100	TraesCS4A03G0821500	0.302853
TraesCS1A03G1060100	TraesCS4A03G0963200	0.329403
TraesCS1A03G1060100	TraesCS4A03G1245300	0.326401
TraesCS1A03G1060100	TraesCS4B03G0032400	0.314242
TraesCS1A03G1060100	TraesCS4B03G0080200	0.33939
TraesCS1A03G1060100	TraesCS4B03G0155100	0.32177
TraesCS1A03G1060100	TraesCS4B03G0327300	0.338701
TraesCS1A03G1060100	TraesCS4B03G0662400	0.337162
TraesCS1A03G1060100	TraesCS4B03G0715100	0.322926
TraesCS1A03G1060100	TraesCS4B03G0923800	0.298801
TraesCS1A03G1060100	TraesCS4B03G0961100	0.33638
TraesCS1A03G1060100	TraesCS4D03G0030100	0.299408
TraesCS1A03G1060100	TraesCS4D03G0050400	0.306649
TraesCS1A03G1060100	TraesCS4D03G0060200	0.304734
TraesCS1A03G1060100	TraesCS4D03G0130100	0.298833
TraesCS1A03G1060100	TraesCS4D03G0156100	0.298756
TraesCS1A03G1060100	TraesCS4D03G0165900	0.330339
TraesCS1A03G1060100	TraesCS4D03G0454600	0.343947
TraesCS1A03G1060100	TraesCS4D03G0522100	0.345297
TraesCS1A03G1060100	TraesCS4D03G0534700	0.352142
TraesCS1A03G1060100	TraesCS4D03G0627100	0.341085
TraesCS1A03G1060100	TraesCS4D03G0657600	0.364588
TraesCS1A03G1060100	TraesCS4D03G0833000	0.316154
TraesCS1A03G1060100	TraesCS5A03G0113700	0.313249
TraesCS1A03G1060100	TraesCS5A03G0225900	0.321975
TraesCS1A03G1060100	TraesCS5A03G0410400	0.360043
TraesCS1A03G1060100	TraesCS5A03G0424100	0.317133
TraesCS1A03G1060100	TraesCS5A03G0931300	0.300187
TraesCS1A03G1060100	TraesCS5A03G1140600	0.354339
TraesCS1A03G1060100	TraesCS5A03G1162700	0.349434
TraesCS1A03G1060100	TraesCS5A03G1189600	0.301924
TraesCS1A03G1060100	TraesCS5A03G1220100	0.335219
TraesCS1A03G1060100	TraesCS5A03G1278000	0.359427
TraesCS1A03G1060100	TraesCS5A03G1279700	0.346982
TraesCS1A03G1060100	TraesCS5A03G1280400	0.300051
TraesCS1A03G1060100	TraesCS5B03G0127200	0.34261
TraesCS1A03G1060100	TraesCS5B03G0189200	0.342931
TraesCS1A03G1060100	TraesCS5B03G0328600	0.300716
TraesCS1A03G1060100	TraesCS5B03G0509600	0.320575
TraesCS1A03G1060100	TraesCS5B03G0798700	0.32422
TraesCS1A03G1060100	TraesCS5B03G0835100	0.30507
TraesCS1A03G1060100	TraesCS5B03G0981700	0.354211
TraesCS1A03G1060100	TraesCS5B03G1049400	0.334303
TraesCS1A03G1060100	TraesCS5B03G1066300	0.308949
TraesCS1A03G1060100	TraesCS5B03G1140700	0.313965
TraesCS1A03G1060100	TraesCS5D03G0133600	0.369786
TraesCS1A03G1060100	TraesCS5D03G0361600	0.332303
TraesCS1A03G1060100	TraesCS5D03G0435100	0.292689
TraesCS1A03G1060100	TraesCS5D03G0444000	0.330529
TraesCS1A03G1060100	TraesCS5D03G0479000	0.307182
TraesCS1A03G1060100	TraesCS5D03G0500400	0.304199
TraesCS1A03G1060100	TraesCS5D03G0723700	0.291214
TraesCS1A03G1060100	TraesCS5D03G0890100	0.316578
TraesCS1A03G1060100	TraesCS5D03G0979300	0.299131
TraesCS1A03G1060100	TraesCS5D03G1125100	0.309503
TraesCS1A03G1060100	TraesCS6B03G0179100	0.309145
TraesCS1A03G1060100	TraesCS6B03G0199900	0.342669
TraesCS1A03G1060100	TraesCS6B03G0234700	0.311947
TraesCS1A03G1060100	TraesCS6B03G0496200	0.303413
TraesCS1A03G1060100	TraesCS6B03G0722300	0.300738
TraesCS1A03G1060100	TraesCS6B03G1088900	0.313078
TraesCS1A03G1060100	TraesCS6D03G0043600	0.347295
TraesCS1A03G1060100	TraesCS7A03G0209400	0.333372
TraesCS1A03G1060100	TraesCS7A03G0222300	0.35931
TraesCS1A03G1060100	TraesCS7A03G0243900	0.317501
TraesCS1A03G1060100	TraesCS7A03G0292200	0.323729
TraesCS1A03G1060100	TraesCS7A03G0373600	0.289633
TraesCS1A03G1060100	TraesCS7A03G0492900	0.304663
TraesCS1A03G1060100	TraesCS7A03G0539000	0.302156
TraesCS1A03G1060100	TraesCS7A03G0610900	0.28923
TraesCS1A03G1060100	TraesCS7A03G0679300	0.348417
TraesCS1A03G1060100	TraesCS7A03G0759000	0.318989
TraesCS1A03G1060100	TraesCS7A03G0822800	0.30987
TraesCS1A03G1060100	TraesCS7A03G0824800	0.351203
TraesCS1A03G1060100	TraesCS7A03G0868600	0.345496
TraesCS1A03G1060100	TraesCS7A03G1057000	0.326866
TraesCS1A03G1060100	TraesCS7A03G1134500	0.323128
TraesCS1A03G1060100	TraesCS7A03G1236900	0.306571
TraesCS1A03G1060100	TraesCS7A03G1267400	0.302274
TraesCS1A03G1060100	TraesCS7B03G0003100	0.362605
TraesCS1A03G1060100	TraesCS7B03G0053800	0.336317
TraesCS1A03G1060100	TraesCS7B03G0075400	0.29467
TraesCS1A03G1060100	TraesCS7B03G0170900	0.310133
TraesCS1A03G1060100	TraesCS7B03G0306700	0.309195
TraesCS1A03G1060100	TraesCS7B03G0393800	0.326265
TraesCS1A03G1060100	TraesCS7B03G0698500	0.352573
TraesCS1A03G1060100	TraesCS7B03G1087800	0.340161
TraesCS1A03G1060100	TraesCS7B03G1178300	0.334735
TraesCS1A03G1060100	TraesCS7D03G0176900	0.300349
TraesCS1A03G1060100	TraesCS7D03G0188900	0.31748
TraesCS1A03G1060100	TraesCS7D03G0357800	0.362393
TraesCS1A03G1060100	TraesCS7D03G0824300	0.337795
TraesCS1A03G1060100	TraesCS7D03G1105700	0.344943
TraesCS1A03G1060100	TraesCS7D03G1271400	0.34211
TraesCS1A03G1079100	TraesCS1A03G0782200	0.312276
TraesCS1A03G1079100	TraesCS1A03G0788400	0.318218
TraesCS1A03G1079100	TraesCS1B03G0192900	0.321053
TraesCS1A03G1079100	TraesCS1B03G0693100	0.340348
TraesCS1A03G1079100	TraesCS1B03G0723500	0.335291
TraesCS1A03G1079100	TraesCS1B03G0772800	0.301593
[truncated: 14,668 more rows]

## Sheet: PG(34_4)_GO
Gene Count:	264
Background Gene Count:	75477
Ontology:	E:\GOAnalyzer\Deployment\Data\gofiles\go-basic.obo
Annotation:	E:\GOAnalyzer\Deployment\data\gofiles\Gene-GO_association.wheat2022
Hierarchy:	All
Correction:	BH FDR p-value adjustment
Max Path Length From Leaf:	N/A
Min Path Length From Root:	3
GO ID	Description	P-Value	Corrected P-Value	Total Genes	Matched Gene Counts	Matched Genes
GO:0046156	siroheme metabolic process	4.231e-08	5.028e-08	3	3 (100%)	TraesCS3D03G0543900;TraesCS3A03G0589100;TraesCS3B03G0669100
GO:0019354	siroheme biosynthetic process	4.231e-08	5.028e-08	3	3 (100%)	TraesCS3D03G0543900;TraesCS3A03G0589100;TraesCS3B03G0669100
GO:0004851	uroporphyrin-III C-methyltransferase activity	4.231e-08	5.028e-08	3	3 (100%)	TraesCS3D03G0543900;TraesCS3A03G0589100;TraesCS3B03G0669100
GO:0043115	precorrin-2 dehydrogenase activity	4.231e-08	5.028e-08	3	3 (100%)	TraesCS3D03G0543900;TraesCS3A03G0589100;TraesCS3B03G0669100
GO:0051266	sirohydrochlorin ferrochelatase activity	4.231e-08	5.028e-08	3	3 (100%)	TraesCS3D03G0543900;TraesCS3A03G0589100;TraesCS3B03G0669100
GO:0044281	small molecule metabolic process	9.97e-08	1.184e-07	3180	32 (1.01%)	TraesCS1D03G0777800;TraesCS5B03G0798700;TraesCS1A03G0782200;TraesCS5B03G0391600;TraesCS3D03G0745500;TraesCS5D03G0723700;TraesCS2A03G0132800;TraesCS4D03G0030100;TraesCS2B03G0027300;TraesCS4A03G0171400;TraesCS1A03G1039400;TraesCS3D03G0543900;TraesCS4D03G0534700;TraesCS3B03G0669100;TraesCS4B03G0653000;TraesCS2B03G1322200;TraesCS7A03G0243900;TraesCS4D03G0249600;TraesCS5B03G1219100;TraesCS5A03G0471800…
GO:0008652	cellular amino acid biosynthetic process	3.97e-07	4.715e-07	338	10 (2.96%)	TraesCS2A03G1166300;TraesCS5D03G0435100;TraesCS7A03G0243900;TraesCS5B03G1219100;TraesCS4A03G0171400;TraesCS5A03G0471800;TraesCS4D03G0534700;TraesCS3D03G0166700;TraesCS2B03G1322200;TraesCS5A03G0368300
GO:0004412	homoserine dehydrogenase activity	4.209e-07	4.998e-07	5	3 (60%)	TraesCS5B03G0391600;TraesCS5D03G0435100;TraesCS5A03G0471800
GO:0009536	plastid	8.713e-07	1.034e-06	2170	24 (1.11%)	TraesCS2A03G1166300;TraesCS3B03G0993600;TraesCS7D03G0759300;TraesCS2D03G0844800;TraesCS5D03G0552200;TraesCS2D03G1002600;TraesCS3B03G0616600;TraesCS2B03G1186800;TraesCS3A03G0996200;TraesCS4A03G0171400;TraesCS1B03G0812500;TraesCS3D03G0543900;TraesCS4D03G0534700;TraesCS3A03G0589100;TraesCS3B03G0669100;TraesCS5B03G0127200;TraesCS2B03G1322200;TraesCS6B03G0199900;TraesCS2D03G0240900;TraesCS6D03G0607700…
GO:0005975	carbohydrate metabolic process	1.084e-06	1.286e-06	2685	27 (1.01%)	TraesCS5B03G0798700;TraesCS3D03G0745500;TraesCS2D03G0467800;TraesCS5D03G0723700;TraesCS2A03G0132800;TraesCS4D03G0030100;TraesCS2A03G0930300;TraesCS5B03G0981700;TraesCS1A03G0608300;TraesCS3B03G0716600;TraesCS3A03G1037900;TraesCS3B03G1330400;TraesCS3D03G0811100;TraesCS4D03G0249600;TraesCS5B03G0520000;TraesCS3A03G0637300;TraesCS3A03G0209200;TraesCS3D03G0582800;TraesCS4A03G0170100;TraesCS5D03G0890100…
GO:0009570	chloroplast stroma	1.593e-06	1.89e-06	491	11 (2.24%)	TraesCS2A03G1166300;TraesCS7D03G0759300;TraesCS2D03G0844800;TraesCS2D03G1002600;TraesCS3B03G0616600;TraesCS2B03G1186800;TraesCS6D03G0607700;TraesCS1B03G0812500;TraesCS3A03G0637300;TraesCS2B03G1322200;TraesCS7A03G0824800
GO:0009507	chloroplast	1.681e-06	1.994e-06	2095	23 (1.1%)	TraesCS2A03G1166300;TraesCS7D03G0759300;TraesCS2D03G0844800;TraesCS5D03G0552200;TraesCS2D03G1002600;TraesCS3B03G0616600;TraesCS2B03G1186800;TraesCS3A03G0996200;TraesCS4A03G0171400;TraesCS1B03G0812500;TraesCS3D03G0543900;TraesCS4D03G0534700;TraesCS3A03G0589100;TraesCS3B03G0669100;TraesCS5B03G0127200;TraesCS2B03G1322200;TraesCS6B03G0199900;TraesCS2D03G0240900;TraesCS6D03G0607700;TraesCS2D03G0467500…
GO:0009532	plastid stroma	2.291e-06	2.717e-06	510	11 (2.16%)	TraesCS2A03G1166300;TraesCS7D03G0759300;TraesCS2D03G0844800;TraesCS2D03G1002600;TraesCS3B03G0616600;TraesCS2B03G1186800;TraesCS6D03G0607700;TraesCS1B03G0812500;TraesCS3A03G0637300;TraesCS2B03G1322200;TraesCS7A03G0824800
GO:0009235	cobalamin metabolic process	3.499e-06	4.149e-06	9	3 (33.33%)	TraesCS3D03G0543900;TraesCS3A03G0589100;TraesCS3B03G0669100
GO:0009236	cobalamin biosynthetic process	3.499e-06	4.149e-06	9	3 (33.33%)	TraesCS3D03G0543900;TraesCS3A03G0589100;TraesCS3B03G0669100
GO:0004325	ferrochelatase activity	3.499e-06	4.149e-06	9	3 (33.33%)	TraesCS3D03G0543900;TraesCS3A03G0589100;TraesCS3B03G0669100
GO:0004553	hydrolase activity, hydrolyzing O-glycosyl compounds	5.123e-06	6.072e-06	1463	18 (1.23%)	TraesCS3D03G0582800;TraesCS2D03G0467800;TraesCS4A03G0170100;TraesCS2A03G0930300;TraesCS5D03G0890100;TraesCS7B03G0393800;TraesCS5B03G0981700;TraesCS5D03G1087800;TraesCS1A03G0608300;TraesCS3B03G0716600;TraesCS3A03G1037900;TraesCS3B03G1330400;TraesCS3D03G0811100;TraesCS4D03G0249600;TraesCS2B03G1298000;TraesCS3A03G0637300;TraesCS5A03G0931300;TraesCS3B03G1196000
GO:0016829	lyase activity	5.72e-06	6.778e-06	1052	15 (1.43%)	TraesCS1A03G0782200;TraesCS3D03G0745500;TraesCS4B03G0327300;TraesCS7D03G1052900;TraesCS3B03G1145300;TraesCS3A03G0996200;TraesCS4A03G0171400;TraesCS3D03G0543900;TraesCS4D03G0534700;TraesCS3A03G0589100;TraesCS3B03G0669100;TraesCS5B03G1219100;TraesCS3D03G0928400;TraesCS5B03G0520000;TraesCS5D03G0479000
GO:0016798	hydrolase activity, acting on glycosyl bonds	5.849e-06	6.93e-06	1627	19 (1.17%)	TraesCS3D03G0582800;TraesCS2D03G0467800;TraesCS4A03G0170100;TraesCS2A03G0930300;TraesCS5D03G0890100;TraesCS7B03G0393800;TraesCS5B03G0981700;TraesCS5D03G1087800;TraesCS1A03G0608300;TraesCS3B03G0716600;TraesCS7B03G1178300;TraesCS3A03G1037900;TraesCS3B03G1330400;TraesCS3D03G0811100;TraesCS4D03G0249600;TraesCS2B03G1298000;TraesCS3A03G0637300;TraesCS5A03G0931300;TraesCS3B03G1196000
GO:0006541	glutamine metabolic process	6.234e-06	7.384e-06	73	5 (6.85%)	TraesCS2A03G1166300;TraesCS4A03G0171400;TraesCS1A03G1039400;TraesCS4D03G0534700;TraesCS2B03G1322200
GO:1901605	alpha-amino acid metabolic process	7.115e-06	8.426e-06	575	11 (1.91%)	TraesCS2A03G1166300;TraesCS5D03G0435100;TraesCS7A03G0243900;TraesCS5B03G1219100;TraesCS4A03G0171400;TraesCS5A03G0471800;TraesCS1A03G1039400;TraesCS4D03G0534700;TraesCS3D03G0166700;TraesCS2B03G1322200;TraesCS5A03G0368300
GO:1901607	alpha-amino acid biosynthetic process	1.331e-05	1.576e-05	303	8 (2.64%)	TraesCS2A03G1166300;TraesCS5D03G0435100;TraesCS7A03G0243900;TraesCS5B03G1219100;TraesCS5A03G0471800;TraesCS3D03G0166700;TraesCS2B03G1322200;TraesCS5A03G0368300
GO:0008169	C-methyltransferase activity	1.866e-05	2.209e-05	15	3 (20%)	TraesCS3D03G0543900;TraesCS3A03G0589100;TraesCS3B03G0669100
GO:0006783	heme biosynthetic process	2.318e-05	2.743e-05	47	4 (8.51%)	TraesCS3D03G0543900;TraesCS3A03G0589100;TraesCS3B03G0669100;TraesCS5B03G0127200
GO:0046872	metal ion binding	3.183e-05	3.765e-05	8842	54 (0.61%)	TraesCS3D03G0745500;TraesCS1A03G0308600;TraesCS7D03G1052900;TraesCS5D03G0091400;TraesCS3B03G1135800;TraesCS4D03G0030100;TraesCS7A03G0610900;TraesCS4B03G0653000;TraesCS7A03G1336800;TraesCS3B03G0716600;TraesCS2D03G0248000;TraesCS4B03G0662400;TraesCS2A03G0345300;TraesCS4D03G0130100;TraesCS1D03G0235300;TraesCS2A03G1334600;TraesCS3B03G0397500;TraesCS2D03G0355800;TraesCS2D03G0361400;TraesCS5D03G0893700…
GO:0000107	imidazoleglycerol-phosphate synthase activity	3.648e-05	4.314e-05	3	2 (66.67%)	TraesCS4A03G0171400;TraesCS4D03G0534700
GO:0048572	short-day photoperiodism	3.648e-05	4.314e-05	3	2 (66.67%)	TraesCS7B03G0306900;TraesCS7A03G0492900
GO:0048576	positive regulation of short-day photoperiodism, flowering	3.648e-05	4.314e-05	3	2 (66.67%)	TraesCS7B03G0306900;TraesCS7A03G0492900
GO:0043169	cation binding	3.944e-05	4.664e-05	8912	54 (0.61%)	TraesCS3D03G0745500;TraesCS1A03G0308600;TraesCS7D03G1052900;TraesCS5D03G0091400;TraesCS3B03G1135800;TraesCS4D03G0030100;TraesCS7A03G0610900;TraesCS4B03G0653000;TraesCS7A03G1336800;TraesCS3B03G0716600;TraesCS2D03G0248000;TraesCS4B03G0662400;TraesCS2A03G0345300;TraesCS4D03G0130100;TraesCS1D03G0235300;TraesCS2A03G1334600;TraesCS3B03G0397500;TraesCS2D03G0355800;TraesCS2D03G0361400;TraesCS5D03G0893700…
GO:0042168	heme metabolic process	4.995e-05	5.904e-05	57	4 (7.02%)	TraesCS3D03G0543900;TraesCS3A03G0589100;TraesCS3B03G0669100;TraesCS5B03G0127200
GO:0016160	amylase activity	7.409e-05	8.756e-05	63	4 (6.35%)	TraesCS3B03G0716600;TraesCS3D03G0582800;TraesCS2D03G0467800;TraesCS3A03G0637300
GO:0005996	monosaccharide metabolic process	8.477e-05	0.0001002	292	7 (2.4%)	TraesCS5B03G0798700;TraesCS5D03G0723700;TraesCS2A03G0300400;TraesCS2D03G0318700;TraesCS4D03G0249600;TraesCS2A03G0132800;TraesCS5D03G1087800
GO:0004856	xylulokinase activity	0.000121	0.000143	5	2 (40%)	TraesCS2A03G0300400;TraesCS2D03G0318700
GO:0005509	calcium ion binding	0.0001402	0.0001656	1087	13 (1.2%)	TraesCS3D03G0582800;TraesCS2D03G0361400;TraesCS4B03G0154400;TraesCS3B03G0716600;TraesCS5D03G0893700;TraesCS2A03G0345600;TraesCS2B03G0463700;TraesCS2A03G0873900;TraesCS2D03G0467500;TraesCS2A03G0345300;TraesCS3A03G0637300;TraesCS4D03G0130100;TraesCS4A03G0647600
GO:0044283	small molecule biosynthetic process	0.0001588	0.0001874	1101	13 (1.18%)	TraesCS2A03G1166300;TraesCS5D03G0435100;TraesCS4A03G0171400;TraesCS3D03G0543900;TraesCS4D03G0534700;TraesCS3A03G0589100;TraesCS3B03G0669100;TraesCS2B03G1322200;TraesCS5A03G0368300;TraesCS7A03G0243900;TraesCS5B03G1219100;TraesCS5A03G0471800;TraesCS3D03G0166700
GO:0016830	carbon-carbon lyase activity	0.0001702	0.0002009	327	7 (2.14%)	TraesCS4B03G0327300;TraesCS3B03G1145300;TraesCS5B03G1219100;TraesCS3A03G0996200;TraesCS3D03G0928400;TraesCS4A03G0171400;TraesCS4D03G0534700
GO:0046148	pigment biosynthetic process	0.0001854	0.0002187	148	5 (3.38%)	TraesCS3D03G0543900;TraesCS3A03G0589100;TraesCS3B03G0669100;TraesCS5B03G0127200;TraesCS3B03G1028000
GO:0016833	oxo-acid-lyase activity	0.0001947	0.0002296	32	3 (9.38%)	TraesCS5B03G1219100;TraesCS4A03G0171400;TraesCS4D03G0534700
GO:0019321	pentose metabolic process	0.0002336	0.0002756	34	3 (8.82%)	TraesCS2A03G0300400;TraesCS2D03G0318700;TraesCS4D03G0249600
GO:0004556	alpha-amylase activity	0.0002773	0.000327	36	3 (8.33%)	TraesCS3B03G0716600;TraesCS3D03G0582800;TraesCS3A03G0637300
GO:0009064	glutamine family amino acid metabolic process	0.000298	0.0003512	164	5 (3.05%)	TraesCS2A03G1166300;TraesCS4A03G0171400;TraesCS1A03G1039400;TraesCS4D03G0534700;TraesCS2B03G1322200
GO:0036374	glutathione hydrolase activity	0.0003366	0.0003966	8	2 (25%)	TraesCS2B03G0886100;TraesCS2D03G0740600
GO:0009909	regulation of flower development	0.0003485	0.0004106	94	4 (4.26%)	TraesCS7B03G0306900;TraesCS2D03G0619100;TraesCS7A03G0492900;TraesCS3B03G1211400
GO:0048831	regulation of shoot system development	0.0004083	0.0004809	98	4 (4.08%)	TraesCS7B03G0306900;TraesCS2D03G0619100;TraesCS7A03G0492900;TraesCS3B03G1211400
GO:0042440	pigment metabolic process	0.0004117	0.0004849	176	5 (2.84%)	TraesCS3D03G0543900;TraesCS3A03G0589100;TraesCS3B03G0669100;TraesCS5B03G0127200;TraesCS3B03G1028000
GO:0016763	pentosyltransferase activity	0.0004243	0.0004996	99	4 (4.04%)	TraesCS4A03G0171400;TraesCS1B03G0812500;TraesCS4D03G0534700;TraesCS3B03G1028000
GO:0048571	long-day photoperiodism	0.0004317	0.0005082	9	2 (22.22%)	TraesCS7B03G0306900;TraesCS7A03G0492900
GO:0016787	hydrolase activity	0.0004336	0.0005103	9082	51 (0.56%)	TraesCS2D03G0467800;TraesCS3D03G0529600;TraesCS1A03G0608300;TraesCS1D03G0547500;TraesCS3B03G0716600;TraesCS3B03G1330400;TraesCS3D03G0811100;TraesCS2D03G0248000;TraesCS5A03G0410400;TraesCS2A03G0087200;TraesCS7A03G0824800;TraesCS3A03G0694500;TraesCS3B03G0397500;TraesCS4B03G0327300;TraesCS4A03G0170100;TraesCS4A03G0491700;TraesCS3A03G0996200;TraesCS7B03G0393800;TraesCS5B03G0407400;TraesCS7A03G0292200…
GO:0006520	cellular amino acid metabolic process	0.0004353	0.0005122	1067	12 (1.12%)	TraesCS2A03G1166300;TraesCS5B03G0391600;TraesCS5D03G0435100;TraesCS7A03G0243900;TraesCS5B03G1219100;TraesCS4A03G0171400;TraesCS5A03G0471800;TraesCS1A03G1039400;TraesCS4D03G0534700;TraesCS3D03G0166700;TraesCS2B03G1322200;TraesCS5A03G0368300
GO:0006779	porphyrin-containing compound biosynthetic process	0.0004929	0.0005798	103	4 (3.88%)	TraesCS3D03G0543900;TraesCS3A03G0589100;TraesCS3B03G0669100;TraesCS5B03G0127200
GO:0015035	protein-disulfide reductase activity	0.0005221	0.000614	283	6 (2.12%)	TraesCS1D03G0777800;TraesCS5B03G0125400;TraesCS2D03G0844800;TraesCS5B03G0256900;TraesCS5A03G0113700;TraesCS5D03G0136400
GO:0004072	aspartate kinase activity	0.0005384	0.000633	10	2 (20%)	TraesCS5D03G0435100;TraesCS5A03G0471800
GO:0015036	disulfide oxidoreductase activity	0.0005417	0.0006367	285	6 (2.11%)	TraesCS1D03G0777800;TraesCS5B03G0125400;TraesCS2D03G0844800;TraesCS5B03G0256900;TraesCS5A03G0113700;TraesCS5D03G0136400
GO:0046394	carboxylic acid biosynthetic process	0.0006529	0.0007672	812	10 (1.23%)	TraesCS2A03G1166300;TraesCS5D03G0435100;TraesCS7A03G0243900;TraesCS5B03G1219100;TraesCS4A03G0171400;TraesCS5A03G0471800;TraesCS4D03G0534700;TraesCS3D03G0166700;TraesCS2B03G1322200;TraesCS5A03G0368300
GO:0042732	D-xylose metabolic process	0.0006565	0.0007713	11	2 (18.18%)	TraesCS2A03G0300400;TraesCS2D03G0318700
GO:0016251	RNA polymerase II general transcription initiation factor activity	0.000786	0.0009231	12	2 (16.67%)	TraesCS4A03G0752500;TraesCS4D03G0022700
GO:0048587	regulation of short-day photoperiodism, flowering	0.000786	0.0009231	12	2 (16.67%)	TraesCS7B03G0306900;TraesCS7A03G0492900
GO:0016628	oxidoreductase activity, acting on the CH-CH group of donors, NAD or NADP as acceptor	0.0009198	0.00108	54	3 (5.56%)	TraesCS3D03G0543900;TraesCS3A03G0589100;TraesCS3B03G0669100
GO:0008138	protein tyrosine/serine/threonine phosphatase activity	0.0009198	0.00108	54	3 (5.56%)	TraesCS5D03G0361600;TraesCS5A03G0410400;TraesCS5B03G0407400
GO:0033014	tetrapyrrole biosynthetic process	0.0009585	0.001125	123	4 (3.25%)	TraesCS3D03G0543900;TraesCS3A03G0589100;TraesCS3B03G0669100;TraesCS5B03G0127200
GO:0016053	organic acid biosynthetic process	0.001116	0.001309	872	10 (1.15%)	TraesCS2A03G1166300;TraesCS5D03G0435100;TraesCS7A03G0243900;TraesCS5B03G1219100;TraesCS4A03G0171400;TraesCS5A03G0471800;TraesCS4D03G0534700;TraesCS3D03G0166700;TraesCS2B03G1322200;TraesCS5A03G0368300
GO:0030001	metal ion transport	0.001184	0.001389	729	9 (1.23%)	TraesCS1D03G0235300;TraesCS1B03G0325000;TraesCS2D03G0355800;TraesCS4D03G0060200;TraesCS5D03G0893700;TraesCS2A03G0873900;TraesCS4A03G0560500;TraesCS1A03G0222200;TraesCS5A03G1278000
GO:0019438	aromatic compound biosynthetic process	0.00119	0.001396	2655	20 (0.75%)	TraesCS4B03G0032400;TraesCS7A03G1223100;TraesCS3D03G1135100;TraesCS2B03G0027300;TraesCS3B03G1163000;TraesCS1A03G1039400;TraesCS1B03G0812500;TraesCS3D03G0543900;TraesCS3A03G0589100;TraesCS3B03G0669100;TraesCS4B03G0653000;TraesCS5B03G0127200;TraesCS4A03G0752500;TraesCS2D03G0196100;TraesCS3A03G1013600;TraesCS1B03G0192900;TraesCS5B03G1219100;TraesCS3A03G0265900;TraesCS3B03G1028000;TraesCS4D03G0022700
GO:0006542	glutamine biosynthetic process	0.001242	0.001456	15	2 (13.33%)	TraesCS2A03G1166300;TraesCS2B03G1322200
GO:0016880	acid-ammonia (or amide) ligase activity	0.001242	0.001456	15	2 (13.33%)	TraesCS2A03G1166300;TraesCS2B03G1322200
GO:0016211	ammonia ligase activity	0.001242	0.001456	15	2 (13.33%)	TraesCS2A03G1166300;TraesCS2B03G1322200
GO:0004356	glutamate-ammonia ligase activity	0.001242	0.001456	15	2 (13.33%)	TraesCS2A03G1166300;TraesCS2B03G1322200
GO:0016667	oxidoreductase activity, acting on a sulfur group of donors	0.001247	0.001462	335	6 (1.79%)	TraesCS1D03G0777800;TraesCS5B03G0125400;TraesCS2D03G0844800;TraesCS5B03G0256900;TraesCS5A03G0113700;TraesCS5D03G0136400
GO:0019752	carboxylic acid metabolic process	0.00131	0.001535	1916	16 (0.84%)	TraesCS2A03G1166300;TraesCS5B03G0391600;TraesCS3D03G0745500;TraesCS5D03G0435100;TraesCS4D03G0030100;TraesCS2B03G0027300;TraesCS4A03G0171400;TraesCS1A03G1039400;TraesCS4D03G0534700;TraesCS2B03G1322200;TraesCS5A03G0368300;TraesCS7A03G0243900;TraesCS5B03G1219100;TraesCS5A03G0471800;TraesCS5B03G0520000;TraesCS3D03G0166700
GO:0009579	thylakoid	0.001389	0.001628	1057	11 (1.04%)	TraesCS2A03G1166300;TraesCS6B03G0199900;TraesCS2D03G0844800;TraesCS5D03G0552200;TraesCS2D03G1002600;TraesCS2B03G1186800;TraesCS2D03G0240900;TraesCS2D03G0467500;TraesCS5B03G0127200;TraesCS2B03G1322200;TraesCS2B03G0698600
GO:0043436	oxoacid metabolic process	0.00144	0.001687	1934	16 (0.83%)	TraesCS2A03G1166300;TraesCS5B03G0391600;TraesCS3D03G0745500;TraesCS5D03G0435100;TraesCS4D03G0030100;TraesCS2B03G0027300;TraesCS4A03G0171400;TraesCS1A03G1039400;TraesCS4D03G0534700;TraesCS2B03G1322200;TraesCS5A03G0368300;TraesCS7A03G0243900;TraesCS5B03G1219100;TraesCS5A03G0471800;TraesCS5B03G0520000;TraesCS3D03G0166700
GO:0006778	porphyrin-containing compound metabolic process	0.00167	0.001956	143	4 (2.8%)	TraesCS3D03G0543900;TraesCS3A03G0589100;TraesCS3B03G0669100;TraesCS5B03G0127200
GO:0006082	organic acid metabolic process	0.001778	0.002082	1975	16 (0.81%)	TraesCS2A03G1166300;TraesCS5B03G0391600;TraesCS3D03G0745500;TraesCS5D03G0435100;TraesCS4D03G0030100;TraesCS2B03G0027300;TraesCS4A03G0171400;TraesCS1A03G1039400;TraesCS4D03G0534700;TraesCS2B03G1322200;TraesCS5A03G0368300;TraesCS7A03G0243900;TraesCS5B03G1219100;TraesCS5A03G0471800;TraesCS5B03G0520000;TraesCS3D03G0166700
GO:0006751	glutathione catabolic process	0.001797	0.002104	18	2 (11.11%)	TraesCS2B03G0886100;TraesCS2D03G0740600
GO:0003978	UDP-glucose 4-epimerase activity	0.001797	0.002104	18	2 (11.11%)	TraesCS5B03G0798700;TraesCS5D03G0723700
GO:0000015	phosphopyruvate hydratase complex	0.002004	0.002345	19	2 (10.53%)	TraesCS3D03G0745500;TraesCS5B03G0520000
GO:0004634	phosphopyruvate hydratase activity	0.002004	0.002345	19	2 (10.53%)	TraesCS3D03G0745500;TraesCS5B03G0520000
GO:0048579	negative regulation of long-day photoperiodism, flowering	0.002004	0.002345	19	2 (10.53%)	TraesCS7B03G0306900;TraesCS7A03G0492900
GO:0043171	peptide catabolic process	0.002221	0.002599	20	2 (10%)	TraesCS2B03G0886100;TraesCS2D03G0740600
GO:0031976	plastid thylakoid	0.002312	0.002704	511	7 (1.37%)	TraesCS2A03G1166300;TraesCS2D03G0844800;TraesCS5D03G0552200;TraesCS2D03G1002600;TraesCS2D03G0240900;TraesCS5B03G0127200;TraesCS2B03G1322200
GO:0009534	chloroplast thylakoid	0.002312	0.002704	511	7 (1.37%)	TraesCS2A03G1166300;TraesCS2D03G0844800;TraesCS5D03G0552200;TraesCS2D03G1002600;TraesCS2D03G0240900;TraesCS5B03G0127200;TraesCS2B03G1322200
GO:0006547	histidine metabolic process	0.00245	0.002865	21	2 (9.52%)	TraesCS4A03G0171400;TraesCS4D03G0534700
GO:0000105	histidine biosynthetic process	0.00245	0.002865	21	2 (9.52%)	TraesCS4A03G0171400;TraesCS4D03G0534700
GO:0033013	tetrapyrrole metabolic process	0.00251	0.002935	160	4 (2.5%)	TraesCS3D03G0543900;TraesCS3A03G0589100;TraesCS3B03G0669100;TraesCS5B03G0127200
GO:0016627	oxidoreductase activity, acting on the CH-CH group of donors	0.00251	0.002935	160	4 (2.5%)	TraesCS3D03G0543900;TraesCS3A03G0589100;TraesCS3B03G0669100;TraesCS5B03G0127200
GO:0019202	amino acid kinase activity	0.002688	0.003143	22	2 (9.09%)	TraesCS5D03G0435100;TraesCS5A03G0471800
GO:0009735	response to cytokinin	0.00275	0.003214	79	3 (3.8%)	TraesCS2A03G1166300;TraesCS2D03G0844800;TraesCS2B03G1322200
GO:0018130	heterocycle biosynthetic process	0.002818	0.003293	2659	19 (0.71%)	TraesCS4B03G0032400;TraesCS7A03G1223100;TraesCS3D03G1135100;TraesCS2B03G0027300;TraesCS3B03G1163000;TraesCS1A03G1039400;TraesCS1B03G0812500;TraesCS3D03G0543900;TraesCS3A03G0589100;TraesCS3B03G0669100;TraesCS4B03G0653000;TraesCS5B03G0127200;TraesCS4A03G0752500;TraesCS3A03G1013600;TraesCS1B03G0192900;TraesCS5B03G1219100;TraesCS3A03G0265900;TraesCS3B03G1028000;TraesCS4D03G0022700
GO:0009648	photoperiodism	0.002938	0.003431	23	2 (8.7%)	TraesCS7B03G0306900;TraesCS7A03G0492900
GO:0042651	thylakoid membrane	0.002947	0.003442	534	7 (1.31%)	TraesCS2A03G1166300;TraesCS2D03G0844800;TraesCS5D03G0552200;TraesCS2D03G1002600;TraesCS2D03G0240900;TraesCS2D03G0467500;TraesCS2B03G1322200
GO:0044273	sulfur compound catabolic process	0.003197	0.003733	24	2 (8.33%)	TraesCS2B03G0886100;TraesCS2D03G0740600
GO:0050661	NADP binding	0.003297	0.003848	282	5 (1.77%)	TraesCS5B03G0391600;TraesCS3B03G0616600;TraesCS5D03G0435100;TraesCS2A03G0132800;TraesCS5A03G0471800
GO:0055086	nucleobase-containing small molecule metabolic process	0.00349	0.004073	857	9 (1.05%)	TraesCS1A03G0782200;TraesCS3D03G0745500;TraesCS4D03G0030100;TraesCS2B03G0027300;TraesCS1A03G1039400;TraesCS1B03G0812500;TraesCS5B03G0520000;TraesCS4B03G0653000;TraesCS3B03G1028000
GO:0043682	P-type divalent copper transporter activity	0.003498	0.004081	1	1 (100%)	TraesCS2D03G0355800
GO:0000048	peptidyltransferase activity	0.003498	0.004081	1	1 (100%)	TraesCS2D03G0740600
GO:2000026	regulation of multicellular organismal development	0.003604	0.004203	177	4 (2.26%)	TraesCS7B03G0306900;TraesCS2D03G0619100;TraesCS7A03G0492900;TraesCS3B03G1211400
GO:0048580	regulation of post-embryonic development	0.003604	0.004203	177	4 (2.26%)	TraesCS7B03G0306900;TraesCS2D03G0619100;TraesCS7A03G0492900;TraesCS3B03G1211400
GO:0006725	cellular aromatic compound metabolic process	0.003685	0.004297	5992	34 (0.57%)	TraesCS4B03G0032400;TraesCS1A03G0782200;TraesCS3D03G0745500;TraesCS7A03G1223100;TraesCS5D03G0444000;TraesCS1D03G0668000;TraesCS4D03G0030100;TraesCS2B03G0027300;TraesCS3B03G1163000;TraesCS1A03G1039400;TraesCS3D03G0543900;TraesCS3B03G0669100;TraesCS4B03G0653000;TraesCS5B03G0127200;TraesCS7B03G1178300;TraesCS2D03G0196100;TraesCS5B03G1219100;TraesCS5B03G0520000;TraesCS7D03G0759300;TraesCS3B03G0397500…
GO:0009067	aspartate family amino acid biosynthetic process	0.003729	0.004347	88	3 (3.41%)	TraesCS5D03G0435100;TraesCS5A03G0471800;TraesCS3D03G0166700
GO:2000243	positive regulation of reproductive process	0.003748	0.004368	26	2 (7.69%)	TraesCS7B03G0306900;TraesCS7A03G0492900
GO:2000241	regulation of reproductive process	0.003978	0.004635	182	4 (2.2%)	TraesCS7B03G0306900;TraesCS2D03G0619100;TraesCS7A03G0492900;TraesCS3B03G1211400
GO:0042219	cellular modified amino acid catabolic process	0.004038	0.004704	27	2 (7.41%)	TraesCS2B03G0886100;TraesCS2D03G0740600
GO:0071704	organic substance metabolic process	0.004073	0.004744	22718	100 (0.44%)	TraesCS5B03G0798700;TraesCS1A03G0782200;TraesCS5B03G0391600;TraesCS3A03G0754500;TraesCS2D03G0467800;TraesCS5D03G0444000;TraesCS2B03G0027300;TraesCS3B03G1163000;TraesCS3D03G0543900;TraesCS4D03G0534700;TraesCS3D03G0529600;TraesCS5B03G1219100;TraesCS7A03G0679300;TraesCS2A03G0087200;TraesCS2A03G1166300;TraesCS3A03G0694500;TraesCS5D03G0552200;TraesCS3B03G0397500;TraesCS4A03G0491700;TraesCS3D03G1135100…
GO:0009526	plastid envelope	0.004241	0.004938	723	8 (1.11%)	TraesCS2A03G1166300;TraesCS2D03G0844800;TraesCS5D03G0552200;TraesCS2D03G1002600;TraesCS2D03G0240900;TraesCS5B03G0127200;TraesCS2B03G1322200;TraesCS7A03G0824800
GO:0042592	homeostatic process	0.00428	0.004982	572	7 (1.22%)	TraesCS1D03G0777800;TraesCS5B03G0125400;TraesCS7D03G0759300;TraesCS2D03G0844800;TraesCS5D03G0893700;TraesCS5B03G0256900;TraesCS5D03G0136400
GO:0046483	heterocycle metabolic process	0.004421	0.005145	5834	33 (0.57%)	TraesCS4B03G0032400;TraesCS1A03G0782200;TraesCS3D03G0745500;TraesCS7A03G1223100;TraesCS5D03G0444000;TraesCS1D03G0668000;TraesCS4D03G0030100;TraesCS2B03G0027300;TraesCS3B03G1163000;TraesCS1A03G1039400;TraesCS3D03G0543900;TraesCS3B03G0669100;TraesCS4B03G0653000;TraesCS5B03G0127200;TraesCS7B03G1178300;TraesCS5B03G1219100;TraesCS5B03G0520000;TraesCS7D03G0759300;TraesCS3B03G0397500;TraesCS2D03G1002600…
GO:0055035	plastid thylakoid membrane	0.004683	0.005449	438	6 (1.37%)	TraesCS2A03G1166300;TraesCS2D03G0844800;TraesCS5D03G0552200;TraesCS2D03G1002600;TraesCS2D03G0240900;TraesCS2B03G1322200
GO:0009535	chloroplast thylakoid membrane	0.004683	0.005449	438	6 (1.37%)	TraesCS2A03G1166300;TraesCS2D03G0844800;TraesCS5D03G0552200;TraesCS2D03G1002600;TraesCS2D03G0240900;TraesCS2B03G1322200
GO:0055085	transmembrane transport	0.00496	0.005769	3222	21 (0.65%)	TraesCS2D03G1134400;TraesCS3B03G0993600;TraesCS1B03G0649800;TraesCS3D03G0688500;TraesCS7D03G1271400;TraesCS2D03G0355800;TraesCS3A03G0053400;TraesCS1A03G0479500;TraesCS5B03G0835100;TraesCS1D03G0452900;TraesCS1D03G0373000;TraesCS1B03G0591800;TraesCS7B03G0053800;TraesCS1B03G0796800;TraesCS2D03G0582100;TraesCS5D03G0344400;TraesCS5D03G0893700;TraesCS2A03G0873900;TraesCS2B03G0967600;TraesCS2B03G1134900…
GO:0016491	oxidoreductase activity	0.005067	0.005893	6583	36 (0.55%)	TraesCS1D03G0777800;TraesCS5B03G0125400;TraesCS5B03G0391600;TraesCS3A03G0815600;TraesCS7D03G0611800;TraesCS1A03G0308600;TraesCS2A03G0132800;TraesCS3B03G1135800;TraesCS2B03G0027300;TraesCS3D03G0543900;TraesCS6B03G0824200;TraesCS3B03G0669100;TraesCS5B03G0127200;TraesCS7A03G0759000;TraesCS7A03G1336800;TraesCS5D03G0136400;TraesCS1A03G1079100;TraesCS5B03G0256900;TraesCS4B03G0662400;TraesCS5A03G0471800…
GO:0034357	photosynthetic membrane	0.005259	0.006115	750	8 (1.07%)	TraesCS2A03G1166300;TraesCS2D03G0844800;TraesCS5D03G0552200;TraesCS2D03G1002600;TraesCS2D03G0240900;TraesCS2D03G0467500;TraesCS2B03G1322200;TraesCS2B03G0698600
GO:1901360	organic cyclic compound metabolic process	0.005355	0.006225	6141	34 (0.55%)	TraesCS4B03G0032400;TraesCS1A03G0782200;TraesCS3D03G0745500;TraesCS7A03G1223100;TraesCS5D03G0444000;TraesCS1D03G0668000;TraesCS4D03G0030100;TraesCS2B03G0027300;TraesCS3B03G1163000;TraesCS1A03G1039400;TraesCS3D03G0543900;TraesCS3B03G0669100;TraesCS4B03G0653000;TraesCS5B03G0127200;TraesCS7B03G1178300;TraesCS5B03G1219100;TraesCS5B03G0520000;TraesCS7D03G0759300;TraesCS3B03G0397500;TraesCS2D03G1002600…
GO:0045454	cell redox homeostasis	0.005387	0.00626	317	5 (1.58%)	TraesCS1D03G0777800;TraesCS5B03G0125400;TraesCS2D03G0844800;TraesCS5B03G0256900;TraesCS5D03G0136400
GO:0009066	aspartate family amino acid metabolic process	0.005783	0.006719	103	3 (2.91%)	TraesCS5D03G0435100;TraesCS5A03G0471800;TraesCS3D03G0166700
GO:0016616	oxidoreductase activity, acting on the CH-OH group of donors, NAD or NADP as acceptor	0.00628	0.007295	329	5 (1.52%)	TraesCS5B03G0391600;TraesCS3B03G0616600;TraesCS5D03G0435100;TraesCS2A03G0132800;TraesCS5A03G0471800
GO:1901362	organic cyclic compound biosynthetic process	0.006457	0.007498	2877	19 (0.66%)	TraesCS4B03G0032400;TraesCS7A03G1223100;TraesCS3D03G1135100;TraesCS2B03G0027300;TraesCS3B03G1163000;TraesCS1A03G1039400;TraesCS1B03G0812500;TraesCS3D03G0543900;TraesCS3A03G0589100;TraesCS3B03G0669100;TraesCS4B03G0653000;TraesCS5B03G0127200;TraesCS4A03G0752500;TraesCS3A03G1013600;TraesCS1B03G0192900;TraesCS5B03G1219100;TraesCS3A03G0265900;TraesCS3B03G1028000;TraesCS4D03G0022700
GO:0006090	pyruvate metabolic process	0.006675	0.00775	211	4 (1.9%)	TraesCS3D03G0745500;TraesCS4D03G0030100;TraesCS2B03G0027300;TraesCS5B03G0520000
GO:0008272	sulfate transport	0.00672	0.0078	35	2 (5.71%)	TraesCS2D03G1134400;TraesCS2A03G1181400
GO:0015116	sulfate transmembrane transporter activity	0.00672	0.0078	35	2 (5.71%)	TraesCS2D03G1134400;TraesCS2A03G1181400
GO:0008271	secondary active sulfate transmembrane transporter activity	0.00672	0.0078	35	2 (5.71%)	TraesCS2D03G1134400;TraesCS2A03G1181400
GO:0019725	cellular homeostasis	0.006805	0.007897	474	6 (1.27%)	TraesCS1D03G0777800;TraesCS5B03G0125400;TraesCS2D03G0844800;TraesCS5D03G0893700;TraesCS5B03G0256900;TraesCS5D03G0136400
GO:0005997	xylulose metabolic process	0.006983	0.008101	2	1 (50%)	TraesCS2A03G0300400
GO:0030093	chloroplast photosystem I	0.006983	0.008101	2	1 (50%)	TraesCS2D03G0240900
GO:0090533	cation-transporting ATPase complex	0.006983	0.008101	2	1 (50%)	TraesCS5D03G0893700
GO:0031004	potassium ion-transporting ATPase complex	0.006983	0.008101	2	1 (50%)	TraesCS5D03G0893700
GO:0005545	1-phosphatidylinositol binding	0.007099	0.008234	36	2 (5.56%)	TraesCS4A03G0604400;TraesCS4D03G0165900
GO:0048582	positive regulation of post-embryonic development	0.007099	0.008234	36	2 (5.56%)	TraesCS7B03G0306900;TraesCS7A03G0492900
GO:0072348	sulfur compound transport	0.007488	0.008683	37	2 (5.41%)	TraesCS2D03G1134400;TraesCS2A03G1181400
GO:1901682	sulfur compound transmembrane transporter activity	0.007488	0.008683	37	2 (5.41%)	TraesCS2D03G1134400;TraesCS2A03G1181400
GO:0048586	regulation of long-day photoperiodism, flowering	0.007488	0.008683	37	2 (5.41%)	TraesCS7B03G0306900;TraesCS7A03G0492900
GO:0022803	passive transmembrane transporter activity	0.007943	0.009208	490	6 (1.22%)	TraesCS7D03G1271400;TraesCS5D03G0893700;TraesCS1A03G0479500;TraesCS5B03G0835100;TraesCS1D03G0452900;TraesCS1B03G0591800
GO:0015267	channel activity	0.007943	0.009208	490	6 (1.22%)	TraesCS7D03G1271400;TraesCS5D03G0893700;TraesCS1A03G0479500;TraesCS5B03G0835100;TraesCS1D03G0452900;TraesCS1B03G0591800
GO:0016836	hydro-lyase activity	0.008201	0.009504	224	4 (1.79%)	TraesCS1A03G0782200;TraesCS3D03G0745500;TraesCS7D03G1052900;TraesCS5B03G0520000
GO:0016774	phosphotransferase activity, carboxyl group as acceptor	0.008293	0.009609	39	2 (5.13%)	TraesCS5D03G0435100;TraesCS5A03G0471800
GO:0051239	regulation of multicellular organismal process	0.008454	0.009793	226	4 (1.77%)	TraesCS7B03G0306900;TraesCS2D03G0619100;TraesCS7A03G0492900;TraesCS3B03G1211400
GO:0048268	clathrin coat assembly	0.00871	0.01	40	2 (5%)	TraesCS4A03G0604400;TraesCS4D03G0165900
GO:2000242	negative regulation of reproductive process	0.00871	0.01	40	2 (5%)	TraesCS7B03G0306900;TraesCS7A03G0492900
GO:0044249	cellular biosynthetic process	0.009072	0.01	6840	36 (0.53%)	TraesCS4B03G0032400;TraesCS3A03G0754500;TraesCS7A03G1223100;TraesCS2D03G0740600;TraesCS2B03G0027300;TraesCS3B03G1163000;TraesCS4A03G0171400;TraesCS1A03G1039400;TraesCS3D03G0543900;TraesCS4D03G0534700;TraesCS3B03G0669100;TraesCS4B03G0653000;TraesCS5B03G0127200;TraesCS2B03G1322200;TraesCS2D03G0196100;TraesCS7A03G0243900;TraesCS5B03G1219100;TraesCS5A03G0471800;TraesCS3A03G0209200;TraesCS4A03G0621000…
GO:0008168	methyltransferase activity	0.009099	0.01	998	9 (0.9%)	TraesCS2D03G0196100;TraesCS1B03G0723500;TraesCS1D03G0594600;TraesCS6D03G0607700;TraesCS3D03G0543900;TraesCS3A03G0589100;TraesCS3B03G0669100;TraesCS7B03G0591100;TraesCS1A03G0634400
GO:0048581	negative regulation of post-embryonic development	0.00957	0.01	42	2 (4.76%)	TraesCS7B03G0306900;TraesCS7A03G0492900
GO:0042972	licheninase activity	0.01	0.01	3	1 (33.33%)	TraesCS1A03G0608300
GO:0016741	transferase activity, transferring one-carbon groups	0.01	0.01	1037	9 (0.87%)	TraesCS2D03G0196100;TraesCS1B03G0723500;TraesCS1D03G0594600;TraesCS6D03G0607700;TraesCS3D03G0543900;TraesCS3A03G0589100;TraesCS3B03G0669100;TraesCS7B03G0591100;TraesCS1A03G0634400
GO:1901135	carbohydrate derivative metabolic process	0.01	0.02	1440	11 (0.76%)	TraesCS1A03G0782200;TraesCS3D03G0745500;TraesCS3B03G0791600;TraesCS2A03G0132800;TraesCS4D03G0030100;TraesCS2B03G0027300;TraesCS1A03G1039400;TraesCS1B03G0812500;TraesCS5B03G0520000;TraesCS4B03G0653000;TraesCS3B03G1028000
GO:1901566	organonitrogen compound biosynthetic process	0.01	0.01	3496	21 (0.6%)	TraesCS2A03G1166300;TraesCS3A03G0396300;TraesCS2D03G0740600;TraesCS5D03G0435100;TraesCS2B03G0027300;TraesCS4A03G0171400;TraesCS1A03G1039400;TraesCS1B03G0812500;TraesCS3D03G0543900;TraesCS4D03G0534700;TraesCS3A03G0589100;TraesCS3B03G0669100;TraesCS5B03G0127200;TraesCS2B03G1322200;TraesCS5A03G0368300;TraesCS3B03G0791600;TraesCS7A03G0243900;TraesCS5B03G1219100;TraesCS5A03G0471800;TraesCS3D03G0166700…
GO:0043100	pyrimidine nucleobase salvage	0.01	0.01	3	1 (33.33%)	TraesCS1B03G0812500
GO:0046112	nucleobase biosynthetic process	0.01	0.02	52	2 (3.85%)	TraesCS1B03G0812500;TraesCS3B03G1028000
GO:0046107	uracil biosynthetic process	0.01	0.01	3	1 (33.33%)	TraesCS1B03G0812500
GO:0006223	uracil salvage	0.01	0.01	3	1 (33.33%)	TraesCS1B03G0812500
GO:0005737	cytoplasm	0.01	0.02	8490	42 (0.49%)	TraesCS5B03G0125400;TraesCS3D03G0745500;TraesCS7A03G1223100;TraesCS3A03G0053400;TraesCS4A03G0171400;TraesCS3D03G0543900;TraesCS4D03G0534700;TraesCS3B03G0669100;TraesCS4B03G0653000;TraesCS5B03G0127200;TraesCS7A03G1336800;TraesCS2B03G1322200;TraesCS5D03G0136400;TraesCS2D03G0705800;TraesCS2D03G0240900;TraesCS6D03G0607700;TraesCS3D03G0928400;TraesCS4A03G0604400;TraesCS5B03G0520000;TraesCS3A03G0637300…
GO:0004845	uracil phosphoribosyltransferase activity	0.01	0.01	3	1 (33.33%)	TraesCS1B03G0812500
GO:0019318	hexose metabolic process	0.01	0.01	243	4 (1.65%)	TraesCS5B03G0798700;TraesCS5D03G0723700;TraesCS2A03G0132800;TraesCS5D03G1087800
GO:0010035	response to inorganic substance	0.01	0.01	519	6 (1.16%)	TraesCS2A03G1166300;TraesCS6B03G0199900;TraesCS7B03G0698500;TraesCS4B03G0662400;TraesCS7A03G1336800;TraesCS2B03G1322200
GO:0042170	plastid membrane	0.01	0.01	518	6 (1.16%)	TraesCS2A03G1166300;TraesCS2D03G0844800;TraesCS5D03G0552200;TraesCS2D03G1002600;TraesCS2D03G0240900;TraesCS2B03G1322200
GO:0009941	chloroplast envelope	0.01	0.01	371	5 (1.35%)	TraesCS2A03G1166300;TraesCS2D03G0844800;TraesCS5B03G0127200;TraesCS2B03G1322200;TraesCS7A03G0824800
GO:0009522	photosystem I	0.01	0.01	129	3 (2.33%)	TraesCS5D03G0552200;TraesCS2D03G0240900;TraesCS2B03G0698600
GO:0034085	establishment of sister chromatid cohesion	0.01	0.01	3	1 (33.33%)	TraesCS2B03G0959500
GO:0034089	establishment of meiotic sister chromatid cohesion	0.01	0.01	3	1 (33.33%)	TraesCS2B03G0959500
GO:0060771	phyllotactic patterning	0.01	0.01	3	1 (33.33%)	TraesCS2B03G0959500
GO:0060772	leaf phyllotactic patterning	0.01	0.01	3	1 (33.33%)	TraesCS2B03G0959500
GO:0006767	water-soluble vitamin metabolic process	0.01	0.02	140	3 (2.14%)	TraesCS3D03G0543900;TraesCS3A03G0589100;TraesCS3B03G0669100
GO:0042364	water-soluble vitamin biosynthetic process	0.01	0.01	134	3 (2.24%)	TraesCS3D03G0543900;TraesCS3A03G0589100;TraesCS3B03G0669100
GO:0051287	NAD binding	0.01	0.01	240	4 (1.67%)	TraesCS3B03G0616600;TraesCS3D03G0543900;TraesCS3A03G0589100;TraesCS3B03G0669100
GO:0016831	carboxy-lyase activity	0.01	0.01	247	4 (1.62%)	TraesCS4B03G0327300;TraesCS3B03G1145300;TraesCS3A03G0996200;TraesCS3D03G0928400
GO:0061650	ubiquitin-like protein conjugating enzyme activity	0.01	0.01	48	2 (4.17%)	TraesCS3B03G0780600;TraesCS5D03G0444000
GO:0061631	ubiquitin conjugating enzyme activity	0.01	0.01	46	2 (4.35%)	TraesCS3B03G0780600;TraesCS5D03G0444000
GO:0003852	2-isopropylmalate synthase activity	0.01	0.01	3	1 (33.33%)	TraesCS5A03G0368300
GO:0006470	protein dephosphorylation	0.01	0.01	241	4 (1.66%)	TraesCS5D03G0361600;TraesCS5A03G0410400;TraesCS6D03G0306800;TraesCS5B03G0407400
GO:0006012	galactose metabolic process	0.01	0.01	43	2 (4.65%)	TraesCS5B03G0798700;TraesCS5D03G0723700
GO:0099094	ligand-gated cation channel activity	0.01	0.02	4	1 (25%)	TraesCS5D03G0893700
GO:0005242	inward rectifier potassium channel activity	0.01	0.02	4	1 (25%)	TraesCS5D03G0893700
GO:0051240	positive regulation of multicellular organismal process	0.01	0.02	51	2 (3.92%)	TraesCS7B03G0306900;TraesCS7A03G0492900
GO:2000071	regulation of defense response by callose deposition	0.01	0.01	3	1 (33.33%)	TraesCS7B03G0698500
GO:0048871	multicellular organismal homeostasis	0.01	0.01	3	1 (33.33%)	TraesCS7D03G0759300
GO:0097009	energy homeostasis	0.01	0.01	3	1 (33.33%)	TraesCS7D03G0759300
GO:0051234	establishment of localization	0.02	0.03	5635	29 (0.51%)	TraesCS1B03G0649800;TraesCS3D03G0688500;TraesCS3A03G0053400;TraesCS1D03G0452900;TraesCS5A03G1278000;TraesCS2D03G0582100;TraesCS2D03G0705800;TraesCS5D03G0344400;TraesCS2B03G0967600;TraesCS2B03G1134900;TraesCS2A03G1181400;TraesCS1D03G0235300;TraesCS2D03G1134400;TraesCS3B03G0993600;TraesCS1B03G0325000;TraesCS7D03G1271400;TraesCS2D03G0355800;TraesCS1A03G0479500;TraesCS5B03G0835100;TraesCS1D03G0373000…
GO:0006810	transport	0.02	0.03	5601	29 (0.52%)	TraesCS1B03G0649800;TraesCS3D03G0688500;TraesCS3A03G0053400;TraesCS1D03G0452900;TraesCS5A03G1278000;TraesCS2D03G0582100;TraesCS2D03G0705800;TraesCS5D03G0344400;TraesCS2B03G0967600;TraesCS2B03G1134900;TraesCS2A03G1181400;TraesCS1D03G0235300;TraesCS2D03G1134400;TraesCS3B03G0993600;TraesCS1B03G0325000;TraesCS7D03G1271400;TraesCS2D03G0355800;TraesCS1A03G0479500;TraesCS5B03G0835100;TraesCS1D03G0373000…
GO:0006811	ion transport	0.02	0.03	1564	11 (0.7%)	TraesCS1D03G0235300;TraesCS2D03G1134400;TraesCS1B03G0325000;TraesCS2D03G0355800;TraesCS4D03G0060200;TraesCS5D03G0893700;TraesCS2A03G0873900;TraesCS4A03G0560500;TraesCS2A03G1181400;TraesCS1A03G0222200;TraesCS5A03G1278000
GO:0044238	primary metabolic process	0.02	0.03	21331	90 (0.42%)	TraesCS5B03G0798700;TraesCS1A03G0782200;TraesCS5B03G0391600;TraesCS3D03G0745500;TraesCS3A03G0754500;TraesCS2D03G0467800;TraesCS3B03G0780600;TraesCS5D03G0444000;TraesCS1D03G0668000;TraesCS2A03G0132800;TraesCS4D03G0030100;TraesCS2B03G0027300;TraesCS3D03G0189000;TraesCS3B03G1163000;TraesCS4D03G0534700;TraesCS3D03G0529600;TraesCS4B03G0653000;TraesCS1A03G0608300;TraesCS2B03G1322200;TraesCS3B03G0716600…
GO:0006139	nucleobase-containing compound metabolic process	0.02	0.02	5269	28 (0.53%)	TraesCS4B03G0032400;TraesCS1A03G0782200;TraesCS3D03G0745500;TraesCS7A03G1223100;TraesCS5D03G0444000;TraesCS1D03G0668000;TraesCS4D03G0030100;TraesCS2B03G0027300;TraesCS3B03G1163000;TraesCS1A03G1039400;TraesCS4B03G0653000;TraesCS7B03G1178300;TraesCS5B03G0520000;TraesCS7D03G0759300;TraesCS3B03G0397500;TraesCS2D03G1002600;TraesCS3B03G1017600;TraesCS3D03G1135100;TraesCS1B03G0812500;TraesCS2B03G0959500…
GO:0009225	nucleotide-sugar metabolic process	0.02	0.02	56	2 (3.57%)	TraesCS1A03G0782200;TraesCS4B03G0653000
GO:0009058	biosynthetic process	0.02	0.02	7451	37 (0.5%)	TraesCS4B03G0032400;TraesCS3A03G0754500;TraesCS7A03G1223100;TraesCS2D03G0740600;TraesCS2B03G0027300;TraesCS3B03G1163000;TraesCS4A03G0171400;TraesCS1A03G1039400;TraesCS3D03G0543900;TraesCS4D03G0534700;TraesCS3B03G0669100;TraesCS4B03G0653000;TraesCS5B03G0127200;TraesCS2B03G1322200;TraesCS2D03G0196100;TraesCS7A03G0243900;TraesCS5B03G1219100;TraesCS5A03G0471800;TraesCS3A03G0209200;TraesCS4A03G0621000…
GO:1901576	organic substance biosynthetic process	0.02	0.02	7032	35 (0.5%)	TraesCS4B03G0032400;TraesCS3A03G0754500;TraesCS7A03G1223100;TraesCS2D03G0740600;TraesCS2B03G0027300;TraesCS3B03G1163000;TraesCS4A03G0171400;TraesCS1A03G1039400;TraesCS3D03G0543900;TraesCS4D03G0534700;TraesCS3B03G0669100;TraesCS4B03G0653000;TraesCS5B03G0127200;TraesCS2B03G1322200;TraesCS7A03G0243900;TraesCS5B03G1219100;TraesCS5A03G0471800;TraesCS3A03G0209200;TraesCS4A03G0621000;TraesCS2A03G1166300…
GO:0019693	ribose phosphate metabolic process	0.02	0.02	577	6 (1.04%)	TraesCS3D03G0745500;TraesCS4D03G0030100;TraesCS2B03G0027300;TraesCS1A03G1039400;TraesCS5B03G0520000;TraesCS3B03G1028000
GO:0009259	ribonucleotide metabolic process	0.02	0.02	574	6 (1.05%)	TraesCS3D03G0745500;TraesCS4D03G0030100;TraesCS2B03G0027300;TraesCS1A03G1039400;TraesCS5B03G0520000;TraesCS3B03G1028000
GO:0016879	ligase activity, forming carbon-nitrogen bonds	0.02	0.03	173	3 (1.73%)	TraesCS2A03G1166300;TraesCS1A03G1039400;TraesCS2B03G1322200
GO:0009112	nucleobase metabolic process	0.02	0.03	65	2 (3.08%)	TraesCS1B03G0812500;TraesCS3B03G1028000
GO:0019860	uracil metabolic process	0.02	0.02	5	1 (20%)	TraesCS1B03G0812500
GO:0018904	ether metabolic process	0.02	0.03	65	2 (3.08%)	TraesCS1D03G0777800;TraesCS2D03G0844800
GO:0006662	glycerol ether metabolic process	0.02	0.03	65	2 (3.08%)	TraesCS1D03G0777800;TraesCS2D03G0844800
GO:0000226	microtubule cytoskeleton organization	0.02	0.03	170	3 (1.76%)	TraesCS3B03G0918900;TraesCS1D03G0848000;TraesCS7B03G0336700
GO:0016614	oxidoreductase activity, acting on CH-OH group of donors	0.02	0.02	421	5 (1.19%)	TraesCS5B03G0391600;TraesCS3B03G0616600;TraesCS5D03G0435100;TraesCS2A03G0132800;TraesCS5A03G0471800
GO:0006851	mitochondrial calcium ion transmembrane transport	0.02	0.02	6	1 (16.67%)	TraesCS2A03G0873900
GO:0009084	glutamine family amino acid biosynthetic process	0.02	0.02	63	2 (3.17%)	TraesCS2A03G1166300;TraesCS2B03G1322200
GO:0008242	omega peptidase activity	0.02	0.03	171	3 (1.75%)	TraesCS2B03G0886100;TraesCS2D03G0740600;TraesCS6D03G0282300
GO:0045144	meiotic sister chromatid segregation	0.02	0.02	6	1 (16.67%)	TraesCS2B03G0959500
GO:0051177	meiotic sister chromatid cohesion	0.02	0.02	6	1 (16.67%)	TraesCS2B03G0959500
GO:0009956	radial pattern formation	0.02	0.03	7	1 (14.29%)	TraesCS2B03G0959500
GO:0015166	polyol transmembrane transporter activity	0.02	0.02	6	1 (16.67%)	TraesCS2D03G0582100
GO:0005365	myo-inositol transmembrane transporter activity	0.02	0.02	6	1 (16.67%)	TraesCS2D03G0582100
GO:0005366	myo-inositol:proton symporter activity	0.02	0.02	6	1 (16.67%)	TraesCS2D03G0582100
GO:0006766	vitamin metabolic process	0.02	0.02	160	3 (1.88%)	TraesCS3D03G0543900;TraesCS3A03G0589100;TraesCS3B03G0669100
GO:0009110	vitamin biosynthetic process	0.02	0.02	154	3 (1.95%)	TraesCS3D03G0543900;TraesCS3A03G0589100;TraesCS3B03G0669100
GO:0000408	EKC/KEOPS complex	0.02	0.02	6	1 (16.67%)	TraesCS3B03G0397500
GO:0004044	amidophosphoribosyltransferase activity	0.02	0.02	6	1 (16.67%)	TraesCS3B03G1028000
GO:0043874	acireductone synthase activity	0.02	0.02	6	1 (16.67%)	TraesCS3D03G0166700
GO:0009135	purine nucleoside diphosphate metabolic process	0.02	0.03	178	3 (1.69%)	TraesCS3D03G0745500;TraesCS4D03G0030100;TraesCS5B03G0520000
GO:0009179	purine ribonucleoside diphosphate metabolic process	0.02	0.03	178	3 (1.69%)	TraesCS3D03G0745500;TraesCS4D03G0030100;TraesCS5B03G0520000
GO:0046031	ADP metabolic process	0.02	0.03	178	3 (1.69%)	TraesCS3D03G0745500;TraesCS4D03G0030100;TraesCS5B03G0520000
GO:0006757	ATP generation from ADP	0.02	0.03	178	3 (1.69%)	TraesCS3D03G0745500;TraesCS4D03G0030100;TraesCS5B03G0520000
GO:0006096	glycolytic process	0.02	0.03	178	3 (1.69%)	TraesCS3D03G0745500;TraesCS4D03G0030100;TraesCS5B03G0520000
GO:0030136	clathrin-coated vesicle	0.02	0.03	67	2 (2.99%)	TraesCS4A03G0604400;TraesCS4D03G0165900
GO:0035091	phosphatidylinositol binding	0.02	0.03	68	2 (2.94%)	TraesCS4A03G0604400;TraesCS4D03G0165900
GO:0030276	clathrin binding	0.02	0.02	59	2 (3.39%)	TraesCS4A03G0604400;TraesCS4D03G0165900
GO:0004633	phosphopantothenoylcysteine decarboxylase activity	0.02	0.02	5	1 (20%)	TraesCS4B03G0327300
GO:0070818	protoporphyrinogen oxidase activity	0.02	0.02	6	1 (16.67%)	TraesCS5B03G0127200
GO:0004729	oxygen-dependent protoporphyrinogen oxidase activity	0.02	0.02	6	1 (16.67%)	TraesCS5B03G0127200
GO:0006081	cellular aldehyde metabolic process	0.02	0.03	69	2 (2.9%)	TraesCS5B03G0328600;TraesCS6B03G0824200
GO:0004049	anthranilate synthase activity	0.02	0.02	5	1 (20%)	TraesCS5B03G1219100
GO:0030007	cellular potassium ion homeostasis	0.02	0.02	6	1 (16.67%)	TraesCS5D03G0893700
GO:0098533	ATPase dependent transmembrane transport complex	0.02	0.02	5	1 (20%)	TraesCS5D03G0893700
GO:0022842	narrow pore channel activity	0.02	0.02	5	1 (20%)	TraesCS5D03G0893700
GO:0022840	leak channel activity	0.02	0.02	5	1 (20%)	TraesCS5D03G0893700
GO:0022841	potassium ion leak channel activity	0.02	0.02	5	1 (20%)	TraesCS5D03G0893700
GO:0051094	positive regulation of developmental process	0.02	0.02	58	2 (3.45%)	TraesCS7B03G0306900;TraesCS7A03G0492900
GO:2000028	regulation of photoperiodism, flowering	0.02	0.02	56	2 (3.57%)	TraesCS7B03G0306900;TraesCS7A03G0492900
GO:0051093	negative regulation of developmental process	0.02	0.02	64	2 (3.12%)	TraesCS7B03G0306900;TraesCS7A03G0492900
GO:0051241	negative regulation of multicellular organismal process	0.02	0.02	59	2 (3.39%)	TraesCS7B03G0306900;TraesCS7A03G0492900
GO:0009514	glyoxysome	0.02	0.02	6	1 (16.67%)	TraesCS7A03G1336800
GO:0006812	cation transport	0.03	0.03	1225	9 (0.73%)	TraesCS1D03G0235300;TraesCS1B03G0325000;TraesCS2D03G0355800;TraesCS4D03G0060200;TraesCS5D03G0893700;TraesCS2A03G0873900;TraesCS4A03G0560500;TraesCS1A03G0222200;TraesCS5A03G1278000
GO:0072593	reactive oxygen species metabolic process	0.03	0.03	665	6 (0.9%)	TraesCS2A03G1334600;TraesCS3D03G0584900;TraesCS1A03G0308600;TraesCS4B03G0662400;TraesCS7A03G1336800;TraesCS7B03G0306700
GO:0022857	transmembrane transporter activity	0.03	0.03	3795	21 (0.55%)	TraesCS2D03G1134400;TraesCS3B03G0993600;TraesCS1B03G0649800;TraesCS3D03G0688500;TraesCS7D03G1271400;TraesCS2D03G0355800;TraesCS1A03G0479500;TraesCS5B03G0835100;TraesCS1D03G0452900;TraesCS1D03G0373000;TraesCS1B03G0591800;TraesCS5A03G1278000;TraesCS7B03G0053800;TraesCS1B03G0796800;TraesCS2D03G0582100;TraesCS5D03G0344400;TraesCS4D03G0060200;TraesCS5D03G0893700;TraesCS2B03G0967600;TraesCS2B03G1134900…
GO:0008460	dTDP-glucose 4,6-dehydratase activity	0.03	0.03	8	1 (12.5%)	TraesCS1A03G0782200
GO:0034654	nucleobase-containing compound biosynthetic process	0.03	0.03	2248	14 (0.62%)	TraesCS4B03G0032400;TraesCS7A03G1223100;TraesCS3D03G1135100;TraesCS2B03G0027300;TraesCS3B03G1163000;TraesCS1A03G1039400;TraesCS1B03G0812500;TraesCS4B03G0653000;TraesCS4A03G0752500;TraesCS3A03G1013600;TraesCS1B03G0192900;TraesCS3A03G0265900;TraesCS3B03G1028000;TraesCS4D03G0022700
GO:0098599	palmitoyl hydrolase activity	0.03	0.04	10	1 (10%)	TraesCS1D03G0547500
GO:0000217	DNA secondary structure binding	0.03	0.04	83	2 (2.41%)	TraesCS2A03G1311600;TraesCS2D03G1277600
GO:0003680	minor groove of adenine-thymine-rich DNA binding	0.03	0.04	80	2 (2.5%)	TraesCS2A03G1311600;TraesCS2D03G1277600
GO:0016903	oxidoreductase activity, acting on the aldehyde or oxo group of donors	0.03	0.03	188	3 (1.6%)	TraesCS5B03G0328600;TraesCS2B03G0027300;TraesCS6B03G0824200
GO:0070003	threonine-type peptidase activity	0.03	0.03	74	2 (2.7%)	TraesCS2B03G0886100;TraesCS2D03G0740600
GO:0080186	developmental vegetative growth	0.03	0.04	10	1 (10%)	TraesCS2B03G0959500
GO:0003729	mRNA binding	0.03	0.04	196	3 (1.53%)	TraesCS3B03G1033800;TraesCS2D03G1002600;TraesCS2B03G1186800
GO:0008757	S-adenosylmethionine-dependent methyltransferase activity	0.03	0.03	332	4 (1.2%)	TraesCS2D03G0196100;TraesCS3D03G0543900;TraesCS3A03G0589100;TraesCS3B03G0669100
GO:0098807	chloroplast thylakoid membrane protein complex	0.03	0.03	8	1 (12.5%)	TraesCS2D03G0240900
GO:0000287	magnesium ion binding	0.03	0.03	474	5 (1.05%)	TraesCS3D03G0745500;TraesCS2D03G0248000;TraesCS4D03G0030100;TraesCS5B03G0520000;TraesCS3D03G0166700
GO:1901618	organic hydroxy compound transmembrane transporter activity	0.03	0.04	10	1 (10%)	TraesCS2D03G0582100
GO:0015295	solute:proton symporter activity	0.03	0.04	10	1 (10%)	TraesCS2D03G0582100
GO:0070887	cellular response to chemical stimulus	0.03	0.03	656	6 (0.91%)	TraesCS7B03G0698500;TraesCS4D03G0060200;TraesCS4B03G0662400;TraesCS3A03G0265900;TraesCS7A03G1336800;TraesCS6D03G0282300
GO:0061711	N(6)-L-threonylcarbamoyladenine synthase activity	0.03	0.03	8	1 (12.5%)	TraesCS3B03G0397500
GO:0009132	nucleoside diphosphate metabolic process	0.03	0.04	200	3 (1.5%)	TraesCS3D03G0745500;TraesCS4D03G0030100;TraesCS5B03G0520000
GO:0046939	nucleotide phosphorylation	0.03	0.04	195	3 (1.54%)	TraesCS3D03G0745500;TraesCS4D03G0030100;TraesCS5B03G0520000
GO:0006165	nucleoside diphosphate phosphorylation	0.03	0.04	193	3 (1.55%)	TraesCS3D03G0745500;TraesCS4D03G0030100;TraesCS5B03G0520000
GO:0009185	ribonucleoside diphosphate metabolic process	0.03	0.03	180	3 (1.67%)	TraesCS3D03G0745500;TraesCS4D03G0030100;TraesCS5B03G0520000
GO:0004615	phosphomannomutase activity	0.03	0.03	8	1 (12.5%)	TraesCS4B03G0653000
GO:0009098	leucine biosynthetic process	0.03	0.03	8	1 (12.5%)	TraesCS5A03G0368300
GO:0008534	oxidized purine nucleobase lesion DNA N-glycosylase activity	0.03	0.04	9	1 (11.11%)	TraesCS7B03G1178300
GO:0034641	cellular nitrogen compound metabolic process	0.04	0.05	7697	36 (0.47%)	TraesCS4B03G0032400;TraesCS1A03G0782200;TraesCS3D03G0745500;TraesCS7A03G1223100;TraesCS5D03G0444000;TraesCS1D03G0668000;TraesCS2D03G0740600;TraesCS4D03G0030100;TraesCS2B03G0027300;TraesCS3B03G1163000;TraesCS1A03G1039400;TraesCS3D03G0543900;TraesCS3B03G0669100;TraesCS4B03G0653000;TraesCS5B03G0127200;TraesCS7B03G1178300;TraesCS5B03G1219100;TraesCS5B03G0520000;TraesCS3A03G0396300;TraesCS7D03G0759300…
GO:0006753	nucleoside phosphate metabolic process	0.04	0.05	717	6 (0.84%)	TraesCS3D03G0745500;TraesCS4D03G0030100;TraesCS2B03G0027300;TraesCS1A03G1039400;TraesCS5B03G0520000;TraesCS3B03G1028000
GO:0009117	nucleotide metabolic process	0.04	0.04	707	6 (0.85%)	TraesCS3D03G0745500;TraesCS4D03G0030100;TraesCS2B03G0027300;TraesCS1A03G1039400;TraesCS5B03G0520000;TraesCS3B03G1028000
GO:0044210	'de novo' CTP biosynthetic process	0.04	0.04	11	1 (9.09%)	TraesCS1A03G1039400
GO:0008655	pyrimidine-containing compound salvage	0.04	0.04	11	1 (9.09%)	TraesCS1B03G0812500
GO:0009116	nucleoside metabolic process	0.04	0.05	96	2 (2.08%)	TraesCS1B03G0812500;TraesCS3B03G1028000
GO:0065008	regulation of biological quality	0.04	0.04	877	7 (0.8%)	TraesCS1D03G0777800;TraesCS5B03G0125400;TraesCS7D03G0759300;TraesCS2D03G0844800;TraesCS5D03G0893700;TraesCS5B03G0256900;TraesCS5D03G0136400
GO:0004185	serine-type carboxypeptidase activity	0.04	0.05	215	3 (1.4%)	TraesCS3A03G0790100;TraesCS4A03G0491700;TraesCS2A03G0087200
GO:0019200	carbohydrate kinase activity	0.04	0.05	90	2 (2.22%)	TraesCS2A03G0300400;TraesCS2D03G0318700
GO:0046686	response to cadmium ion	0.04	0.04	87	2 (2.3%)	TraesCS2A03G1166300;TraesCS2B03G1322200
GO:0015291	secondary active transmembrane transporter activity	0.04	0.04	525	5 (0.95%)	TraesCS2D03G1134400;TraesCS3B03G0993600;TraesCS3D03G0688500;TraesCS2D03G0582100;TraesCS2A03G1181400
GO:0009150	purine ribonucleotide metabolic process	0.04	0.05	540	5 (0.93%)	TraesCS3D03G0745500;TraesCS4D03G0030100;TraesCS2B03G0027300;TraesCS5B03G0520000;TraesCS3B03G1028000
GO:0044272	sulfur compound biosynthetic process	0.04	0.05	220	3 (1.36%)	TraesCS7A03G0243900;TraesCS2B03G0027300;TraesCS3D03G0166700
GO:0035434	copper ion transmembrane transport	0.04	0.05	13	1 (7.69%)	TraesCS2D03G0355800
GO:0050793	regulation of developmental process	0.04	0.04	363	4 (1.1%)	TraesCS7B03G0306900;TraesCS2D03G0619100;TraesCS7A03G0492900;TraesCS3B03G1211400
GO:1901259	chloroplast rRNA processing	0.04	0.05	13	1 (7.69%)	TraesCS2D03G1002600
GO:0070525	tRNA threonylcarbamoyladenosine metabolic process	0.04	0.05	12	1 (8.33%)	TraesCS3B03G0397500
GO:0002949	tRNA threonylcarbamoyladenosine modification	0.04	0.04	11	1 (9.09%)	TraesCS3B03G0397500
GO:0106345	glyoxylate reductase activity	0.04	0.04	11	1 (9.09%)	TraesCS3B03G0616600
GO:0030267	glyoxylate reductase (NADP+) activity	0.04	0.04	11	1 (9.09%)	TraesCS3B03G0616600
GO:0004579	dolichyl-diphosphooligosaccharide-protein glycotransferase activity	0.04	0.05	13	1 (7.69%)	TraesCS3B03G0791600
GO:0000097	sulfur amino acid biosynthetic process	0.04	0.05	90	2 (2.22%)	TraesCS7A03G0243900;TraesCS3D03G0166700
GO:0006352	DNA-templated transcription, initiation	0.04	0.05	214	3 (1.4%)	TraesCS4B03G0032400;TraesCS4A03G0752500;TraesCS4D03G0022700
GO:0000302	response to reactive oxygen species	0.04	0.04	86	2 (2.33%)	TraesCS4B03G0662400;TraesCS7A03G1336800
GO:0016857	racemase and epimerase activity, acting on carbohydrates and derivatives	0.04	0.04	85	2 (2.35%)	TraesCS5B03G0798700;TraesCS5D03G0723700
GO:0055075	potassium ion homeostasis	0.04	0.05	12	1 (8.33%)	TraesCS5D03G0893700
GO:0004096	catalase activity	0.04	0.05	13	1 (7.69%)	TraesCS7A03G1336800
GO:0000702	oxidized base lesion DNA N-glycosylase activity	0.04	0.05	12	1 (8.33%)	TraesCS7B03G1178300
GO:1901657	glycosyl compound metabolic process	0.05	0.05	99	2 (2.02%)	TraesCS1B03G0812500;TraesCS3B03G1028000
GO:0004180	carboxypeptidase activity	0.05	0.05	225	3 (1.33%)	TraesCS3A03G0790100;TraesCS4A03G0491700;TraesCS2A03G0087200
GO:0070008	serine-type exopeptidase activity	0.05	0.05	228	3 (1.32%)	TraesCS3A03G0790100;TraesCS4A03G0491700;TraesCS2A03G0087200
GO:0004345	glucose-6-phosphate dehydrogenase activity	0.05	0.05	14	1 (7.14%)	TraesCS2A03G0132800
GO:0006163	purine nucleotide metabolic process	0.05	0.05	561	5 (0.89%)	TraesCS3D03G0745500;TraesCS4D03G0030100;TraesCS2B03G0027300;TraesCS5B03G0520000;TraesCS3B03G1028000
GO:0009298	GDP-mannose biosynthetic process	0.05	0.05	14	1 (7.14%)	TraesCS4B03G0653000
GO:0016311	dephosphorylation	0.05	0.06	392	4 (1.02%)	TraesCS5D03G0361600;TraesCS5A03G0410400;TraesCS6D03G0306800;TraesCS5B03G0407400
GO:0004721	phosphoprotein phosphatase activity	0.05	0.06	389	4 (1.03%)	TraesCS5D03G0361600;TraesCS5A03G0410400;TraesCS6D03G0306800;TraesCS5B03G0407400
GO:0006013	mannose metabolic process	0.05	0.05	14	1 (7.14%)	TraesCS5D03G1087800
GO:0030968	endoplasmic reticulum unfolded protein response	0.05	0.05	14	1 (7.14%)	TraesCS6D03G0282300

## Sheet: School_B_nodes
nodeName	Alt_nodeName	Degree	Internal Degree
PG(34:3)		98	98	PG(36:6)
PG(36:6)		54	PG(34:3)	54	Gene name	Refseq Description
TraesCS5D03G1052800	LOC123123396	252	92	48		UDP-glycosyltransferase 91C1-like
TraesCS2D03G0055600	TraesCS2D03G0055600	412	92	44		HR-like lesion-inducer family protein
TraesCS7D03G1177500	LOC123166649	373	92	44		putative aldehyde oxidase-like protein isoform X1
TraesCS7A03G1041100	NRT2.4	572	91	44	NRT2.4	High-affinity nitrate transporter, Nitrate transport, Auxin signalin
TraesCS3B03G0209700	LOC123068643	526	90	43		probable folate-biopterin transporter 8, chloroplastic
TraesCS7A03G0835900	prx15	345	89	46	prx15	peroxidase 1-like
TraesCS5A03G0211900	OsGELP114	684	89	42	OsGELP114	GDSL esterase/lipase At3g50400-like
TraesCS5D03G0829100	OsRCI2-11	620	89	42	OsRCI2-11	low temperature-induced protein lt101.2-like
TraesCS2A03G1313500	OsAAE3	753	89	41	OsAAE3	oxalate--CoA ligase-like
TraesCS2B03G1177400	LOC123046603	549	89	41		Serine/threonine protein kinase-related domain containing protein
TraesCS5B03G1202400	LOC123114013	747	89	41		NAD(P)-binding domain containing protein
TraesCS7D03G0732100	LOC123164182	764	89	41		BTB/POZ domain-containing protein At1g30440-like
TraesCS7D03G0906100	LOC123165469	473	88	41		uncharacterized membrane protein At1g16860-like
TraesCS1A03G0405200	WDA1	848	88	40	CER1-1A	very-long-chain aldehyde decarbonylase GL1-5-like
TraesCS5B03G1309300	LOC123114315	124	86	52		uncharacterized protein At4g15970-like
TraesCS5D03G0230900	LOC123119728	476	86	39		uncharacterized protein LOC123119728
TraesCS7D03G0593300	OsLTPG22	260	85	39	OsLTPG22	non-specific lipid transfer protein GPI-anchored 1-like
TraesCS2B03G0082600	TraesCS2B03G0082600	272	84	46		HR-like lesion-inducer family protein
TraesCS3A03G0166500	TraesCS3A03G0166500	393	84	37		Biopterin transport-related protein BT1 family protein
TraesCS7D03G0991300	LOC123164299	463	81	41		probable xyloglucan endotransglucosylase/hydrolase protein 23
TraesCS5B03G1016400	KIN8B	429	80	41		kinesin-like protein KIN-8B
TraesCS1D03G1012400	LOC123178542	613	78	38		pathogen-related protein
TraesCS7B03G0471200	LOC123161595	517	78	37		manganese-dependent ADP-ribose/CDP-alcohol diphosphatase-like
TraesCS1A03G0273200	TraesCS1A03G0273200	98	76	43
TraesCS5A03G0564800	LOC123103810	592	76	37		low molecular mass early light-inducible protein HV90, chloroplastic-like
TraesCS4B03G1005300	LOC123094051	461	75	39		DIBOA-glucoside dioxygenase BX6-like
TraesCS7D03G0115600	LOC123168276	195	75	39		malonyl-CoA:anthocyanidin 5-O-glucoside-6''-O-malonyltransferase-like
TraesCS7D03G0069600	LOC542994	178	74	40	GSTU3	Glutathione transferase
TraesCS7D03G0789500	LOC123164672	172	70	31		uncharacterized protein LOC123164672
TraesCS3B03G0141200	LOC123068468	351	66	34		non-specific lipid-transfer protein 4.1-like
TraesCSU03G0053700	TraesCSU03G0053700	100	64	52		Non-specific lipid-transfer protein
TraesCS1B03G0654800	SGPP	187	63	41	SGPP	haloacid dehalogenase-like hydrolase domain-containing protein Sgpp
TraesCS1D03G0432700	LOC123167947	196	63	32		bifunctional epoxide hydrolase 2-like
TraesCS2B03G0480100	OsPME20	263	63	32	OsPME20	pectinesterase QRT1-like
TraesCS1A03G0264000	TraesCS1A03G0264000	264	61	31
TraesCS6D03G0785900	COX17-2	169	59	30		cytochrome c oxidase copper chaperone 2-like
TraesCS1A03G0781500	LOC123163754	159	59	28		high molecular mass early light-inducible protein HV58, chloroplastic-like
TraesCS2A03G0017800	PIN1	153	54	33		peptidyl-prolyl cis-trans isomerase Pin1-like
TraesCS2D03G0269600	LOC123051706	146	50	41		cysteine proteinase inhibitor 8-like
TraesCS4D03G0115300	LOC123096007	211	50	25		peptide-N4-(N-acetyl-beta-glucosaminyl)asparagine amidase A-like
TraesCS2B03G1321000	LOC123047005	90	29	30		uncharacterized protein LOC123047005
TraesCS1A03G0628300	RER4	261	22	24		protein RETICULATA-RELATED 4, chloroplastic-like
TraesCS5D03G1235900	LOC123126317	213	22	24		phytosulfokine receptor 2-like
TraesCS1B03G0717300	RER4	252	19	21		protein RETICULATA-RELATED 4, chloroplastic-like
TraesCS3A03G0719100	LOC123058561	217	16	19		serine carboxypeptidase-like 2
TraesCS7D03G0960100	LOC123166350	77	16	19		uncharacterized protein LOC123166350
TraesCS2A03G0251900	LOC123187598	64	13	17		momilactone A synthase-like
TraesCS1A03G0507800	LOC123126800	725	83	0		uncharacterized protein LOC123126800
TraesCS1A03G0809500	PSBW	648	81	0	PSBW	photosystem II reaction center W protein, chloroplastic-like
TraesCS1A03G0986400	COR413-TM1	430	72	0	COR413-TM1	cold-regulated 413 inner membrane protein 2, chloroplastic-like
TraesCS1B03G1010000	OsCBL4	784	87	0	OsCBL4	calcineurin B-like protein 4
TraesCS1D03G0282100	LOC123180686	124	63	0		UDP-glycosyltransferase 73E1-like
TraesCS1D03G0886200	LOC123175202	769	86	0		non-specific lipid-transfer protein 2-like
TraesCS1D03G0886300	OsLTP2.5	200	63	0	OsLTP2.5	non-specific lipid-transfer protein 2-like
TraesCS2A03G0325900	LOC123187869	802	83	0		uncharacterized protein LOC123187869
TraesCS2A03G0402700	LOC123188161	159	65	0		interferon-related developmental regulator 2-like
TraesCS2A03G1241200	SODA1	94	61	0	SODA1	superoxide dismutase
TraesCS2B03G0026900	PIN1	507	73	0		peptidyl-prolyl cis-trans isomerase Pin1-like
TraesCS2B03G0514500	LOC123044366	194	64	0		interferon-related developmental regulator 2-like
TraesCS2B03G0553100	LOC123044530	163	61	0		uncharacterized protein LOC123044530 isoform X1
TraesCS2B03G0949900	LOC123045882	727	87	0		chitinase 4-like
TraesCS2B03G1090200	OsbHLH015	463	76	0	OsbHLH015	anthocyanin regulatory R-S protein-like isoform X1
TraesCS2B03G1218400	TraesCS2B03G1218400	178	73	0
TraesCS2B03G1308500	SAPK1	430	70	0	SAPK1	abscisic acid-inducible protein kinase-like isoform X1
TraesCS2D03G0017900	PIN1	253	75	0	PIN1	peptidyl-prolyl cis-trans isomerase Pin1-like
TraesCS2D03G0668700	TraesCS2D03G0668700	262	75	0
TraesCS2D03G0812700	OsHCT1	385	67	0	OsHCT1	hydroxycinnamoyltransferase 1-like
TraesCS3A03G0674500	LOC123061858	545	87	0		uncharacterized protein LOC123061858
TraesCS3A03G0864500	AKR3	498	69	0	AKR3	NADPH-dependent aldo-keto reductase, chloroplastic-like
TraesCS3B03G0987700	P5CS2	830	83	0	P5CS2	delta-1-pyrroline-5-carboxylate synthase 2-like
TraesCS3D03G0149900	LOC123077168	843	84	0		probable folate-biopterin transporter 8, chloroplastic
TraesCS3D03G0983400	LOC123080463	569	59	0		probable esterase PIR7A
TraesCS4A03G0180900	LOC123085359	364	75	0		Harpin-induced 1 domain containing protein
TraesCS4B03G0501400	CK1	438	70	0	CIPK31	CBL-interacting protein kinase 31-like
TraesCS4B03G0822600	OsERF#128	741	83	0	OsERF#128	ethylene-responsive transcription factor ERF096-like
TraesCS4D03G0486700	LOC123085546	790	84	0		salt stress-induced hydrophobic peptide ESI3
TraesCS5A03G0357300	LOC123106814	261	81	0		protein FAF-like, chloroplastic
TraesCS5A03G0434000	TraesCS5A03G0434000	718	87	0
TraesCS5A03G0564700	LOC123103812	641	83	0		low molecular mass early light-inducible protein HV90, chloroplastic-like
TraesCS5A03G0864400	OsRCI2-11	760	88	0	OsRCI2-11	low temperature-induced protein lt101.2-like
TraesCS5A03G1094100	TraesCS5A03G1094100	830	85	0
TraesCS5A03G1126300	LOC543245	819	85	0	ADF8	actin-depolymerizing factor 3
TraesCS5B03G0429600	TraesCS5B03G0429600	822	88	0
TraesCS5B03G1138700	LOC123117319	662	86	0		probable lactoylglutathione lyase, chloroplastic isoform X1
TraesCS5B03G1309400	LOC123117751	801	87	0		Nucleotide-diphospho-sugar transferase domain containing protein
TraesCS5D03G0038400	TraesCS5D03G0038400	542	75	0
TraesCS5D03G0913900	LOC123122960	689	82	0		cold-regulated 413 plasma membrane protein 1-like
TraesCS5D03G1169700	LOC123126176	695	86	0		Nucleotide-diphospho-sugar transferase domain containing protein
TraesCS6B03G0350900	LOC123136221	418	69	0		uncharacterized protein LOC123136221
TraesCS7A03G0407600	TraesCS7A03G0407600	201	36	0
TraesCS7A03G0941200	LOC123148313	510	69	0		uncharacterized membrane protein At1g16860-like
TraesCS7A03G1064300	OsLEA4	613	82	0	OsLEA4	Late embryogenesis abundant (LEA) group 1 family protein
TraesCS7B03G0347800	NTR2	47	21	0	NTRA	thioredoxin reductase NTRA
TraesCS7B03G0888400	LOC123162191	613	84	0		uncharacterized protein LOC123162191
TraesCS7D03G0113400	LOC123164646	438	66	0		7-deoxyloganetin glucosyltransferase-like isoform X1
TraesCS7D03G0126800	TraesCS7D03G0126800	784	83	0
TraesCS7D03G0500500	OsEnS-122	736	89	0	OsEnS-122	protein HVA22 isoform X1
TraesCS7D03G0553900	HMGR	232	64	0	HMGR	3-hydroxy-3-methylglutaryl-coenzyme A reductase 3-like
TraesCS1B03G0794500	LOC123093356	113	0	37		glucan endo-1,3-beta-glucosidase 14-like
TraesCS2D03G0679000	GIF1	137	0	31	GIF1	beta-fructofuranosidase, insoluble isoenzyme 2
TraesCS5D03G0530500	LOC123124838	142	0	26		low molecular mass early light-inducible protein HV90, chloroplastic-like
TraesCS3D03G0837600	LOC123079953	168	0	22		SUN domain-containing protein 4-like isoform X2
TraesCS2D03G0902200	LOC123054129	149	0	21		Similar to OSIGBa0147H17.2 protein
TraesCS6D03G0698800	LOC123145583	135	0	20		non-specific lipid transfer protein-like 1 isoform X2
TraesCS3B03G0139600	LOC123068466	217	0	15		non-specific lipid-transfer protein 4.3-like

## Sheet: PG(34_3)_nodes
nodeName	Alt_nodeName	Degree	Internal Degree	Association Strength
PG(34:3)	PG(34:3)	98	98		entire net	subnet
TraesCS5D03G1052800	LOC123123396	252	92	average degree	438.172	72.3838
TraesCS2D03G0055600	TraesCS2D03G0055600	412	92	Strength	0.0339668	0.73115
TraesCS7D03G1177500	LOC123166649	373	92
TraesCS7A03G1041100	NRT2.4	572	91
TraesCS3B03G0209700	LOC123068643	526	90
TraesCS7A03G0835900	prx15	345	89
TraesCS5A03G0211900	OsGELP114	684	89
TraesCS5D03G0829100	OsRCI2-11	620	89
TraesCS2A03G1313500	OsAAE3	753	89
TraesCS2B03G1177400	LOC123046603	549	89
TraesCS5B03G1202400	LOC123114013	747	89
TraesCS7D03G0732100	LOC123164182	764	89
TraesCS7D03G0906100	LOC123165469	473	88
TraesCS1A03G0405200	WDA1	848	88
TraesCS5B03G1309300	LOC123114315	124	86
TraesCS5D03G0230900	LOC123119728	476	86
TraesCS7D03G0593300	OsLTPG22	260	85
TraesCS2B03G0082600	TraesCS2B03G0082600	272	84
TraesCS3A03G0166500	TraesCS3A03G0166500	393	84
TraesCS7D03G0991300	LOC123164299	463	81
TraesCS5B03G1016400	KIN8B	429	80
TraesCS1D03G1012400	LOC123178542	613	78
TraesCS7B03G0471200	LOC123161595	517	78
TraesCS1A03G0273200	TraesCS1A03G0273200	98	76
TraesCS5A03G0564800	LOC123103810	592	76
TraesCS4B03G1005300	LOC123094051	461	75
TraesCS7D03G0115600	LOC123168276	195	75
TraesCS7D03G0069600	LOC542994	178	74
TraesCS7D03G0789500	LOC123164672	172	70
TraesCS3B03G0141200	LOC123068468	351	66
TraesCSU03G0053700	TraesCSU03G0053700	100	64
TraesCS1B03G0654800	SGPP	187	63
TraesCS1D03G0432700	LOC123167947	196	63
TraesCS2B03G0480100	OsPME20	263	63
TraesCS1A03G0264000	TraesCS1A03G0264000	264	61
TraesCS6D03G0785900	COX17-2	169	59
TraesCS1A03G0781500	LOC123163754	159	59
TraesCS2A03G0017800	PIN1	153	54
TraesCS2D03G0269600	LOC123051706	146	50
TraesCS4D03G0115300	LOC123096007	211	50
TraesCS2B03G1321000	LOC123047005	90	29
TraesCS1A03G0628300	RER4	261	22
TraesCS5D03G1235900	LOC123126317	213	22
TraesCS1B03G0717300	RER4	252	19
TraesCS3A03G0719100	LOC123058561	217	16
TraesCS7D03G0960100	LOC123166350	77	16
TraesCS2A03G0251900	LOC123187598	64	13
TraesCS1A03G0507800	LOC123126800	725	83
TraesCS1A03G0809500	PSBW	648	81
TraesCS1A03G0986400	COR413-TM1	430	72
TraesCS1B03G1010000	OsCBL4	784	87
TraesCS1D03G0282100	LOC123180686	124	63
TraesCS1D03G0886200	LOC123175202	769	86
TraesCS1D03G0886300	OsLTP2.5	200	63
TraesCS2A03G0325900	LOC123187869	802	83
TraesCS2A03G0402700	LOC123188161	159	65
TraesCS2A03G1241200	SODA1	94	61
TraesCS2B03G0026900	PIN1	507	73
TraesCS2B03G0514500	LOC123044366	194	64
TraesCS2B03G0553100	LOC123044530	163	61
TraesCS2B03G0949900	LOC123045882	727	87
TraesCS2B03G1090200	OsbHLH015	463	76
TraesCS2B03G1218400	TraesCS2B03G1218400	178	73
TraesCS2B03G1308500	SAPK1	430	70
TraesCS2D03G0017900	PIN1	253	75
TraesCS2D03G0668700	TraesCS2D03G0668700	262	75
TraesCS2D03G0812700	OsHCT1	385	67
TraesCS3A03G0674500	LOC123061858	545	87
TraesCS3A03G0864500	AKR3	498	69
TraesCS3B03G0987700	P5CS2	830	83
TraesCS3D03G0149900	LOC123077168	843	84
TraesCS3D03G0983400	LOC123080463	569	59
TraesCS4A03G0180900	LOC123085359	364	75
TraesCS4B03G0501400	CK1	438	70
TraesCS4B03G0822600	OsERF#128	741	83
TraesCS4D03G0486700	LOC123085546	790	84
TraesCS5A03G0357300	LOC123106814	261	81
TraesCS5A03G0434000	TraesCS5A03G0434000	718	87
TraesCS5A03G0564700	LOC123103812	641	83
TraesCS5A03G0864400	OsRCI2-11	760	88
TraesCS5A03G1094100	TraesCS5A03G1094100	830	85
TraesCS5A03G1126300	LOC543245	819	85
TraesCS5B03G0429600	TraesCS5B03G0429600	822	88
TraesCS5B03G1138700	LOC123117319	662	86
TraesCS5B03G1309400	LOC123117751	801	87
TraesCS5D03G0038400	TraesCS5D03G0038400	542	75
TraesCS5D03G0913900	LOC123122960	689	82
TraesCS5D03G1169700	LOC123126176	695	86
TraesCS6B03G0350900	LOC123136221	418	69
TraesCS7A03G0407600	TraesCS7A03G0407600	201	36
TraesCS7A03G0941200	LOC123148313	510	69
TraesCS7A03G1064300	OsLEA4	613	82
TraesCS7B03G0347800	NTR2	47	21
TraesCS7B03G0888400	LOC123162191	613	84
TraesCS7D03G0113400	LOC123164646	438	66
TraesCS7D03G0126800	TraesCS7D03G0126800	784	83
TraesCS7D03G0500500	OsEnS-122	736	89
TraesCS7D03G0553900	HMGR	232	64

## Sheet: PG(34_3)_edges
fromNode	toNode	weight
TraesCS1A03G0264000	PG(34:3)	0.297586
TraesCS1A03G0273200	PG(34:3)	0.290461
TraesCS1A03G0405200	PG(34:3)	0.310245
TraesCS1A03G0507800	PG(34:3)	0.291681
TraesCS1A03G0628300	PG(34:3)	0.293648
TraesCS1A03G0781500	PG(34:3)	0.296351
TraesCS1A03G0809500	PG(34:3)	0.307215
TraesCS1A03G0986400	PG(34:3)	0.299354
TraesCS1B03G0654800	PG(34:3)	0.292686
TraesCS1B03G0717300	PG(34:3)	0.298992
TraesCS1B03G1010000	PG(34:3)	0.296708
TraesCS1D03G0282100	PG(34:3)	0.293336
TraesCS1D03G0432700	PG(34:3)	0.297295
TraesCS1D03G0886200	PG(34:3)	0.29263
TraesCS1D03G0886300	PG(34:3)	0.291134
TraesCS1D03G1012400	PG(34:3)	0.30306
TraesCS2A03G0017800	PG(34:3)	0.292837
TraesCS2A03G0251900	PG(34:3)	0.289528
TraesCS2A03G0325900	PG(34:3)	0.292407
TraesCS2A03G0402700	PG(34:3)	0.292809
TraesCS2A03G1241200	PG(34:3)	0.290432
TraesCS2A03G1313500	PG(34:3)	0.319582
TraesCS2B03G0026900	PG(34:3)	0.29244
TraesCS2B03G0082600	PG(34:3)	0.315604
TraesCS2B03G0480100	PG(34:3)	0.291712
TraesCS2B03G0514500	PG(34:3)	0.29043
TraesCS2B03G0553100	PG(34:3)	0.291487
TraesCS2B03G0949900	PG(34:3)	0.294607
TraesCS2B03G1090200	PG(34:3)	0.298767
TraesCS2B03G1177400	PG(34:3)	0.311654
TraesCS2B03G1218400	PG(34:3)	0.300325
TraesCS2B03G1308500	PG(34:3)	0.297836
TraesCS2B03G1321000	PG(34:3)	0.310266
TraesCS2D03G0017900	PG(34:3)	0.295577
TraesCS2D03G0055600	PG(34:3)	0.318762
TraesCS2D03G0269600	PG(34:3)	0.290879
TraesCS2D03G0668700	PG(34:3)	0.292406
TraesCS2D03G0812700	PG(34:3)	0.301271
TraesCS3A03G0166500	PG(34:3)	0.308624
TraesCS3A03G0674500	PG(34:3)	0.302705
TraesCS3A03G0719100	PG(34:3)	0.293554
TraesCS3A03G0864500	PG(34:3)	0.290481
TraesCS3B03G0141200	PG(34:3)	0.30894
TraesCS3B03G0209700	PG(34:3)	0.316946
TraesCS3B03G0987700	PG(34:3)	0.291538
TraesCS3D03G0149900	PG(34:3)	0.299539
TraesCS3D03G0983400	PG(34:3)	0.289156
TraesCS4A03G0180900	PG(34:3)	0.30175
TraesCS4B03G0501400	PG(34:3)	0.298047
TraesCS4B03G0822600	PG(34:3)	0.289322
TraesCS4B03G1005300	PG(34:3)	0.305741
TraesCS4D03G0115300	PG(34:3)	0.295146
TraesCS4D03G0486700	PG(34:3)	0.290424
TraesCS5A03G0211900	PG(34:3)	0.318904
TraesCS5A03G0357300	PG(34:3)	0.290305
TraesCS5A03G0434000	PG(34:3)	0.299104
TraesCS5A03G0564700	PG(34:3)	0.301039
TraesCS5A03G0564800	PG(34:3)	0.303734
TraesCS5A03G0864400	PG(34:3)	0.306798
TraesCS5A03G1094100	PG(34:3)	0.295894
TraesCS5A03G1126300	PG(34:3)	0.294863
TraesCS5B03G0429600	PG(34:3)	0.305858
TraesCS5B03G1016400	PG(34:3)	0.315732
TraesCS5B03G1138700	PG(34:3)	0.292295
TraesCS5B03G1202400	PG(34:3)	0.318235
TraesCS5B03G1309300	PG(34:3)	0.297441
TraesCS5B03G1309400	PG(34:3)	0.301303
TraesCS5D03G0038400	PG(34:3)	0.293951
TraesCS5D03G0230900	PG(34:3)	0.311662
TraesCS5D03G0829100	PG(34:3)	0.316862
TraesCS5D03G0913900	PG(34:3)	0.300265
TraesCS5D03G1052800	PG(34:3)	0.314183
TraesCS5D03G1169700	PG(34:3)	0.300057
TraesCS5D03G1235900	PG(34:3)	0.289421
TraesCS6B03G0350900	PG(34:3)	0.297471
TraesCS6D03G0785900	PG(34:3)	0.293942
TraesCS7A03G0407600	PG(34:3)	0.293992
TraesCS7A03G0835900	PG(34:3)	0.310439
TraesCS7A03G0941200	PG(34:3)	0.296849
TraesCS7A03G1041100	PG(34:3)	0.318752
TraesCS7A03G1064300	PG(34:3)	0.291619
TraesCS7B03G0347800	PG(34:3)	0.289887
TraesCS7B03G0471200	PG(34:3)	0.30508
TraesCS7B03G0888400	PG(34:3)	0.293235
TraesCS7D03G0069600	PG(34:3)	0.299401
TraesCS7D03G0113400	PG(34:3)	0.288906
TraesCS7D03G0115600	PG(34:3)	0.308636
TraesCS7D03G0126800	PG(34:3)	0.298789
TraesCS7D03G0500500	PG(34:3)	0.306524
TraesCS7D03G0553900	PG(34:3)	0.290672
TraesCS7D03G0593300	PG(34:3)	0.302538
TraesCS7D03G0732100	PG(34:3)	0.313647
TraesCS7D03G0789500	PG(34:3)	0.298921
TraesCS7D03G0906100	PG(34:3)	0.312307
TraesCS7D03G0960100	PG(34:3)	0.300269
TraesCS7D03G0991300	PG(34:3)	0.313056
TraesCS7D03G1177500	PG(34:3)	0.319545
TraesCSU03G0053700	PG(34:3)	0.288954
TraesCS1A03G0264000	TraesCS1A03G0273200	0.293163
TraesCS1A03G0264000	TraesCS1A03G0405200	0.33426
TraesCS1A03G0264000	TraesCS1A03G0507800	0.321216
TraesCS1A03G0264000	TraesCS1A03G0809500	0.307308
TraesCS1A03G0264000	TraesCS1B03G1010000	0.316087
TraesCS1A03G0264000	TraesCS1D03G0432700	0.29838
TraesCS1A03G0264000	TraesCS1D03G0886200	0.318756
TraesCS1A03G0264000	TraesCS1D03G1012400	0.312494
TraesCS1A03G0264000	TraesCS2A03G0325900	0.32597
TraesCS1A03G0264000	TraesCS2A03G0402700	0.289239
TraesCS1A03G0264000	TraesCS2A03G1313500	0.317143
TraesCS1A03G0264000	TraesCS2B03G0082600	0.29747
TraesCS1A03G0264000	TraesCS2B03G0949900	0.314677
TraesCS1A03G0264000	TraesCS2B03G1090200	0.303538
TraesCS1A03G0264000	TraesCS2B03G1177400	0.305304
TraesCS1A03G0264000	TraesCS2D03G0055600	0.30053
TraesCS1A03G0264000	TraesCS3A03G0166500	0.299316
TraesCS1A03G0264000	TraesCS3A03G0674500	0.293482
TraesCS1A03G0264000	TraesCS3A03G0864500	0.29199
TraesCS1A03G0264000	TraesCS3B03G0141200	0.297304
TraesCS1A03G0264000	TraesCS3B03G0209700	0.305652
TraesCS1A03G0264000	TraesCS3B03G0987700	0.333787
TraesCS1A03G0264000	TraesCS3D03G0149900	0.334207
TraesCS1A03G0264000	TraesCS3D03G0983400	0.306934
TraesCS1A03G0264000	TraesCS4B03G0822600	0.309573
TraesCS1A03G0264000	TraesCS4B03G1005300	0.297634
TraesCS1A03G0264000	TraesCS4D03G0486700	0.320914
TraesCS1A03G0264000	TraesCS5A03G0211900	0.312142
TraesCS1A03G0264000	TraesCS5A03G0434000	0.304577
TraesCS1A03G0264000	TraesCS5A03G0564700	0.305925
TraesCS1A03G0264000	TraesCS5A03G0564800	0.306793
TraesCS1A03G0264000	TraesCS5A03G0864400	0.317009
TraesCS1A03G0264000	TraesCS5A03G1094100	0.325723
TraesCS1A03G0264000	TraesCS5A03G1126300	0.323468
TraesCS1A03G0264000	TraesCS5B03G0429600	0.326565
TraesCS1A03G0264000	TraesCS5B03G1016400	0.300416
TraesCS1A03G0264000	TraesCS5B03G1138700	0.299636
TraesCS1A03G0264000	TraesCS5B03G1202400	0.318135
TraesCS1A03G0264000	TraesCS5B03G1309300	0.29133
TraesCS1A03G0264000	TraesCS5B03G1309400	0.325597
TraesCS1A03G0264000	TraesCS5D03G0230900	0.29494
TraesCS1A03G0264000	TraesCS5D03G0829100	0.307229
TraesCS1A03G0264000	TraesCS5D03G0913900	0.314496
TraesCS1A03G0264000	TraesCS5D03G1052800	0.293066
TraesCS1A03G0264000	TraesCS5D03G1169700	0.317027
TraesCS1A03G0264000	TraesCS6D03G0785900	0.295635
TraesCS1A03G0264000	TraesCS7A03G0835900	0.294719
TraesCS1A03G0264000	TraesCS7A03G0941200	0.296145
TraesCS1A03G0264000	TraesCS7A03G1041100	0.301618
TraesCS1A03G0264000	TraesCS7A03G1064300	0.298014
TraesCS1A03G0264000	TraesCS7B03G0471200	0.305008
TraesCS1A03G0264000	TraesCS7B03G0888400	0.295633
TraesCS1A03G0264000	TraesCS7D03G0126800	0.326307
TraesCS1A03G0264000	TraesCS7D03G0500500	0.311617
TraesCS1A03G0264000	TraesCS7D03G0553900	0.293019
TraesCS1A03G0264000	TraesCS7D03G0732100	0.315002
TraesCS1A03G0264000	TraesCS7D03G0789500	0.289872
TraesCS1A03G0264000	TraesCS7D03G0906100	0.290232
TraesCS1A03G0264000	TraesCS7D03G0991300	0.298229
TraesCS1A03G0264000	TraesCS7D03G1177500	0.304767
TraesCS1A03G0273200	TraesCS1A03G0405200	0.310775
TraesCS1A03G0273200	TraesCS1A03G0507800	0.296297
TraesCS1A03G0273200	TraesCS1A03G0628300	0.293649
TraesCS1A03G0273200	TraesCS1A03G0809500	0.295386
TraesCS1A03G0273200	TraesCS1A03G0986400	0.296076
TraesCS1A03G0273200	TraesCS1B03G0717300	0.297856
TraesCS1A03G0273200	TraesCS1B03G1010000	0.296828
TraesCS1A03G0273200	TraesCS1D03G0886200	0.297297
TraesCS1A03G0273200	TraesCS1D03G1012400	0.300183
TraesCS1A03G0273200	TraesCS2A03G0251900	0.297751
TraesCS1A03G0273200	TraesCS2A03G0325900	0.293512
TraesCS1A03G0273200	TraesCS2A03G0402700	0.290383
TraesCS1A03G0273200	TraesCS2A03G1313500	0.310219
TraesCS1A03G0273200	TraesCS2B03G0082600	0.304056
TraesCS1A03G0273200	TraesCS2B03G0480100	0.289999
TraesCS1A03G0273200	TraesCS2B03G0949900	0.299894
TraesCS1A03G0273200	TraesCS2B03G1090200	0.301132
TraesCS1A03G0273200	TraesCS2B03G1177400	0.311746
TraesCS1A03G0273200	TraesCS2B03G1308500	0.293486
TraesCS1A03G0273200	TraesCS2B03G1321000	0.302192
TraesCS1A03G0273200	TraesCS2D03G0055600	0.312402
TraesCS1A03G0273200	TraesCS2D03G0668700	0.289837
TraesCS1A03G0273200	TraesCS2D03G0812700	0.296994
TraesCS1A03G0273200	TraesCS3A03G0166500	0.306219
TraesCS1A03G0273200	TraesCS3A03G0674500	0.297695
TraesCS1A03G0273200	TraesCS3A03G0864500	0.29048
TraesCS1A03G0273200	TraesCS3B03G0141200	0.295605
TraesCS1A03G0273200	TraesCS3B03G0209700	0.313474
TraesCS1A03G0273200	TraesCS3B03G0987700	0.295808
TraesCS1A03G0273200	TraesCS3D03G0149900	0.301744
TraesCS1A03G0273200	TraesCS4B03G0501400	0.292431
TraesCS1A03G0273200	TraesCS4B03G1005300	0.295268
TraesCS1A03G0273200	TraesCS4D03G0486700	0.292313
TraesCS1A03G0273200	TraesCS5A03G0211900	0.313567
TraesCS1A03G0273200	TraesCS5A03G0357300	0.2898
TraesCS1A03G0273200	TraesCS5A03G0434000	0.294209
TraesCS1A03G0273200	TraesCS5A03G0564700	0.293147
TraesCS1A03G0273200	TraesCS5A03G0564800	0.295764
TraesCS1A03G0273200	TraesCS5A03G0864400	0.30614
TraesCS1A03G0273200	TraesCS5A03G1094100	0.296438
TraesCS1A03G0273200	TraesCS5A03G1126300	0.296335
TraesCS1A03G0273200	TraesCS5B03G0429600	0.307124
TraesCS1A03G0273200	TraesCS5B03G1016400	0.303646
TraesCS1A03G0273200	TraesCS5B03G1138700	0.292517
TraesCS1A03G0273200	TraesCS5B03G1202400	0.316954
TraesCS1A03G0273200	TraesCS5B03G1309300	0.290686
TraesCS1A03G0273200	TraesCS5B03G1309400	0.305065
TraesCS1A03G0273200	TraesCS5D03G0038400	0.291296
TraesCS1A03G0273200	TraesCS5D03G0230900	0.309678
TraesCS1A03G0273200	TraesCS5D03G0829100	0.311701
TraesCS1A03G0273200	TraesCS5D03G0913900	0.29541
TraesCS1A03G0273200	TraesCS5D03G1052800	0.3054
TraesCS1A03G0273200	TraesCS5D03G1169700	0.304569
TraesCS1A03G0273200	TraesCS5D03G1235900	0.295966
TraesCS1A03G0273200	TraesCS6B03G0350900	0.29442
TraesCS1A03G0273200	TraesCS7A03G0407600	0.29799
TraesCS1A03G0273200	TraesCS7A03G0835900	0.301055
TraesCS1A03G0273200	TraesCS7A03G1041100	0.31122
TraesCS1A03G0273200	TraesCS7B03G0347800	0.290428
TraesCS1A03G0273200	TraesCS7B03G0471200	0.292455
TraesCS1A03G0273200	TraesCS7B03G0888400	0.293698
TraesCS1A03G0273200	TraesCS7D03G0069600	0.29235
TraesCS1A03G0273200	TraesCS7D03G0115600	0.291558
TraesCS1A03G0273200	TraesCS7D03G0126800	0.296928
TraesCS1A03G0273200	TraesCS7D03G0500500	0.304827
TraesCS1A03G0273200	TraesCS7D03G0553900	0.291949
TraesCS1A03G0273200	TraesCS7D03G0593300	0.289434
TraesCS1A03G0273200	TraesCS7D03G0732100	0.307596
TraesCS1A03G0273200	TraesCS7D03G0789500	0.296492
TraesCS1A03G0273200	TraesCS7D03G0906100	0.300799
TraesCS1A03G0273200	TraesCS7D03G0960100	0.2992
TraesCS1A03G0273200	TraesCS7D03G0991300	0.297888
TraesCS1A03G0273200	TraesCS7D03G1177500	0.310785
TraesCS1A03G0273200	TraesCSU03G0053700	0.291873
TraesCS1A03G0405200	TraesCS1A03G0507800	0.342874
TraesCS1A03G0405200	TraesCS1A03G0781500	0.317001
TraesCS1A03G0405200	TraesCS1A03G0809500	0.343641
TraesCS1A03G0405200	TraesCS1A03G0986400	0.326562
TraesCS1A03G0405200	TraesCS1B03G0654800	0.292114
TraesCS1A03G0405200	TraesCS1B03G1010000	0.341415
TraesCS1A03G0405200	TraesCS1D03G0282100	0.31475
TraesCS1A03G0405200	TraesCS1D03G0432700	0.333533
TraesCS1A03G0405200	TraesCS1D03G0886200	0.345311
TraesCS1A03G0405200	TraesCS1D03G0886300	0.300107
TraesCS1A03G0405200	TraesCS1D03G1012400	0.341786
TraesCS1A03G0405200	TraesCS2A03G0017800	0.294817
TraesCS1A03G0405200	TraesCS2A03G0325900	0.34791
TraesCS1A03G0405200	TraesCS2A03G0402700	0.322493
TraesCS1A03G0405200	TraesCS2A03G1241200	0.314626
TraesCS1A03G0405200	TraesCS2A03G1313500	0.337222
TraesCS1A03G0405200	TraesCS2B03G0026900	0.343046
TraesCS1A03G0405200	TraesCS2B03G0082600	0.321687
TraesCS1A03G0405200	TraesCS2B03G0480100	0.334323
TraesCS1A03G0405200	TraesCS2B03G0514500	0.300557
TraesCS1A03G0405200	TraesCS2B03G0553100	0.32794
TraesCS1A03G0405200	TraesCS2B03G0949900	0.340376
TraesCS1A03G0405200	TraesCS2B03G1090200	0.337291
TraesCS1A03G0405200	TraesCS2B03G1177400	0.334766
TraesCS1A03G0405200	TraesCS2B03G1218400	0.32069
TraesCS1A03G0405200	TraesCS2B03G1308500	0.325761
TraesCS1A03G0405200	TraesCS2D03G0017900	0.323223
TraesCS1A03G0405200	TraesCS2D03G0055600	0.325879
TraesCS1A03G0405200	TraesCS2D03G0668700	0.333277
TraesCS1A03G0405200	TraesCS2D03G0812700	0.317708
TraesCS1A03G0405200	TraesCS3A03G0166500	0.33228
TraesCS1A03G0405200	TraesCS3A03G0674500	0.328009
TraesCS1A03G0405200	TraesCS3A03G0864500	0.326768
TraesCS1A03G0405200	TraesCS3B03G0141200	0.32863
TraesCS1A03G0405200	TraesCS3B03G0209700	0.33374
TraesCS1A03G0405200	TraesCS3B03G0987700	0.352663
TraesCS1A03G0405200	TraesCS3D03G0149900	0.348694
TraesCS1A03G0405200	TraesCS3D03G0983400	0.338906
TraesCS1A03G0405200	TraesCS4A03G0180900	0.324338
TraesCS1A03G0405200	TraesCS4B03G0501400	0.326834
TraesCS1A03G0405200	TraesCS4B03G0822600	0.342136
TraesCS1A03G0405200	TraesCS4B03G1005300	0.326605
TraesCS1A03G0405200	TraesCS4D03G0115300	0.321524
TraesCS1A03G0405200	TraesCS4D03G0486700	0.348709
TraesCS1A03G0405200	TraesCS5A03G0211900	0.341764
TraesCS1A03G0405200	TraesCS5A03G0357300	0.325537
TraesCS1A03G0405200	TraesCS5A03G0434000	0.33763
TraesCS1A03G0405200	TraesCS5A03G0564700	0.332415
TraesCS1A03G0405200	TraesCS5A03G0564800	0.331158
TraesCS1A03G0405200	TraesCS5A03G0864400	0.342023
TraesCS1A03G0405200	TraesCS5A03G1094100	0.346761
TraesCS1A03G0405200	TraesCS5A03G1126300	0.347037
TraesCS1A03G0405200	TraesCS5B03G0429600	0.341778
TraesCS1A03G0405200	TraesCS5B03G1016400	0.327893
TraesCS1A03G0405200	TraesCS5B03G1138700	0.338412
TraesCS1A03G0405200	TraesCS5B03G1202400	0.340747
TraesCS1A03G0405200	TraesCS5B03G1309300	0.307935
TraesCS1A03G0405200	TraesCS5B03G1309400	0.344104
TraesCS1A03G0405200	TraesCS5D03G0038400	0.334759
TraesCS1A03G0405200	TraesCS5D03G0230900	0.326639
TraesCS1A03G0405200	TraesCS5D03G0829100	0.339243
TraesCS1A03G0405200	TraesCS5D03G0913900	0.338406
TraesCS1A03G0405200	TraesCS5D03G1052800	0.319373
TraesCS1A03G0405200	TraesCS5D03G1169700	0.339843
TraesCS1A03G0405200	TraesCS6B03G0350900	0.324633
TraesCS1A03G0405200	TraesCS6D03G0785900	0.328198
TraesCS1A03G0405200	TraesCS7A03G0835900	0.320235
TraesCS1A03G0405200	TraesCS7A03G0941200	0.327975
TraesCS1A03G0405200	TraesCS7A03G1041100	0.333025
TraesCS1A03G0405200	TraesCS7A03G1064300	0.33283
TraesCS1A03G0405200	TraesCS7B03G0471200	0.345345
TraesCS1A03G0405200	TraesCS7B03G0888400	0.334036
TraesCS1A03G0405200	TraesCS7D03G0069600	0.308459
TraesCS1A03G0405200	TraesCS7D03G0113400	0.328033
TraesCS1A03G0405200	TraesCS7D03G0115600	0.316535
TraesCS1A03G0405200	TraesCS7D03G0126800	0.34272
TraesCS1A03G0405200	TraesCS7D03G0500500	0.338739
TraesCS1A03G0405200	TraesCS7D03G0553900	0.331602
TraesCS1A03G0405200	TraesCS7D03G0593300	0.321057
TraesCS1A03G0405200	TraesCS7D03G0732100	0.335189
TraesCS1A03G0405200	TraesCS7D03G0789500	0.322638
TraesCS1A03G0405200	TraesCS7D03G0906100	0.330743
TraesCS1A03G0405200	TraesCS7D03G0991300	0.331482
TraesCS1A03G0405200	TraesCS7D03G1177500	0.327904
TraesCS1A03G0405200	TraesCSU03G0053700	0.294242
TraesCS1A03G0507800	TraesCS1A03G0781500	0.309686
TraesCS1A03G0507800	TraesCS1A03G0809500	0.329475
TraesCS1A03G0507800	TraesCS1A03G0986400	0.303852
TraesCS1A03G0507800	TraesCS1B03G1010000	0.330668
TraesCS1A03G0507800	TraesCS1D03G0282100	0.303704
TraesCS1A03G0507800	TraesCS1D03G0432700	0.319534
TraesCS1A03G0507800	TraesCS1D03G0886200	0.326986
TraesCS1A03G0507800	TraesCS1D03G1012400	0.328535
TraesCS1A03G0507800	TraesCS2A03G0325900	0.334189
TraesCS1A03G0507800	TraesCS2A03G0402700	0.302797
TraesCS1A03G0507800	TraesCS2A03G1241200	0.305288
TraesCS1A03G0507800	TraesCS2A03G1313500	0.334188
TraesCS1A03G0507800	TraesCS2B03G0026900	0.326852
TraesCS1A03G0507800	TraesCS2B03G0082600	0.313328
TraesCS1A03G0507800	TraesCS2B03G0480100	0.322407
TraesCS1A03G0507800	TraesCS2B03G0553100	0.310632
TraesCS1A03G0507800	TraesCS2B03G0949900	0.320836
TraesCS1A03G0507800	TraesCS2B03G1090200	0.31971
TraesCS1A03G0507800	TraesCS2B03G1177400	0.317878
TraesCS1A03G0507800	TraesCS2B03G1218400	0.306939
TraesCS1A03G0507800	TraesCS2B03G1308500	0.303478
TraesCS1A03G0507800	TraesCS2D03G0017900	0.305755
TraesCS1A03G0507800	TraesCS2D03G0055600	0.31399
TraesCS1A03G0507800	TraesCS2D03G0668700	0.313637
TraesCS1A03G0507800	TraesCS2D03G0812700	0.298695
TraesCS1A03G0507800	TraesCS3A03G0166500	0.312727
TraesCS1A03G0507800	TraesCS3A03G0674500	0.312244
TraesCS1A03G0507800	TraesCS3A03G0864500	0.308444
TraesCS1A03G0507800	TraesCS3B03G0141200	0.321314
TraesCS1A03G0507800	TraesCS3B03G0209700	0.314717
TraesCS1A03G0507800	TraesCS3B03G0987700	0.34028
TraesCS1A03G0507800	TraesCS3D03G0149900	0.340881
TraesCS1A03G0507800	TraesCS3D03G0983400	0.328344
TraesCS1A03G0507800	TraesCS4A03G0180900	0.30743
TraesCS1A03G0507800	TraesCS4B03G0501400	0.302927
TraesCS1A03G0507800	TraesCS4B03G0822600	0.323397
TraesCS1A03G0507800	TraesCS4B03G1005300	0.319801
TraesCS1A03G0507800	TraesCS4D03G0115300	0.316508
TraesCS1A03G0507800	TraesCS4D03G0486700	0.33076
TraesCS1A03G0507800	TraesCS5A03G0211900	0.325995
TraesCS1A03G0507800	TraesCS5A03G0357300	0.314833
TraesCS1A03G0507800	TraesCS5A03G0434000	0.322159
TraesCS1A03G0507800	TraesCS5A03G0564700	0.323295
TraesCS1A03G0507800	TraesCS5A03G0564800	0.323912
TraesCS1A03G0507800	TraesCS5A03G0864400	0.329066
TraesCS1A03G0507800	TraesCS5A03G1094100	0.337235
TraesCS1A03G0507800	TraesCS5A03G1126300	0.335087
TraesCS1A03G0507800	TraesCS5B03G0429600	0.337464
TraesCS1A03G0507800	TraesCS5B03G1016400	0.319789
TraesCS1A03G0507800	TraesCS5B03G1138700	0.31735
TraesCS1A03G0507800	TraesCS5B03G1202400	0.331447
TraesCS1A03G0507800	TraesCS5B03G1309300	0.295197
TraesCS1A03G0507800	TraesCS5B03G1309400	0.333679
TraesCS1A03G0507800	TraesCS5D03G0038400	0.312603
TraesCS1A03G0507800	TraesCS5D03G0230900	0.307957
TraesCS1A03G0507800	TraesCS5D03G0829100	0.320768
TraesCS1A03G0507800	TraesCS5D03G0913900	0.32715
TraesCS1A03G0507800	TraesCS5D03G1052800	0.307415
TraesCS1A03G0507800	TraesCS5D03G1169700	0.320898
TraesCS1A03G0507800	TraesCS6B03G0350900	0.301576
TraesCS1A03G0507800	TraesCS6D03G0785900	0.31692
TraesCS1A03G0507800	TraesCS7A03G0835900	0.299944
TraesCS1A03G0507800	TraesCS7A03G0941200	0.320616
TraesCS1A03G0507800	TraesCS7A03G1041100	0.314135
TraesCS1A03G0507800	TraesCS7A03G1064300	0.321047
TraesCS1A03G0507800	TraesCS7B03G0471200	0.328518
TraesCS1A03G0507800	TraesCS7B03G0888400	0.313893
TraesCS1A03G0507800	TraesCS7D03G0069600	0.29097
TraesCS1A03G0507800	TraesCS7D03G0113400	0.303368
TraesCS1A03G0507800	TraesCS7D03G0115600	0.306182
TraesCS1A03G0507800	TraesCS7D03G0126800	0.334758
TraesCS1A03G0507800	TraesCS7D03G0500500	0.326504
TraesCS1A03G0507800	TraesCS7D03G0553900	0.315326
TraesCS1A03G0507800	TraesCS7D03G0593300	0.303402
TraesCS1A03G0507800	TraesCS7D03G0732100	0.327798
TraesCS1A03G0507800	TraesCS7D03G0789500	0.305478
TraesCS1A03G0507800	TraesCS7D03G0906100	0.314808
TraesCS1A03G0507800	TraesCS7D03G0991300	0.322071
TraesCS1A03G0507800	TraesCS7D03G1177500	0.315466
TraesCS1A03G0628300	TraesCS1B03G0654800	0.32291
TraesCS1A03G0628300	TraesCS1B03G0717300	0.33821
TraesCS1A03G0628300	TraesCS1D03G0886300	0.306078
TraesCS1A03G0628300	TraesCS2A03G0017800	0.311915
TraesCS1A03G0628300	TraesCS2A03G0251900	0.305763
TraesCS1A03G0628300	TraesCS2B03G0514500	0.309719
TraesCS1A03G0628300	TraesCS2B03G1321000	0.317476
TraesCS1A03G0628300	TraesCS2D03G0269600	0.328157
TraesCS1A03G0628300	TraesCS3A03G0719100	0.346954
TraesCS1A03G0628300	TraesCS5B03G1309300	0.30541
TraesCS1A03G0628300	TraesCS5D03G1052800	0.293679
TraesCS1A03G0628300	TraesCS5D03G1235900	0.324984
TraesCS1A03G0628300	TraesCS7A03G0407600	0.322323
TraesCS1A03G0628300	TraesCS7A03G0835900	0.302274
TraesCS1A03G0628300	TraesCS7B03G0347800	0.307427
TraesCS1A03G0628300	TraesCS7D03G0069600	0.304988
TraesCS1A03G0628300	TraesCS7D03G0115600	0.289662
TraesCS1A03G0628300	TraesCS7D03G0593300	0.293473
TraesCS1A03G0628300	TraesCS7D03G0960100	0.306866
TraesCS1A03G0628300	TraesCSU03G0053700	0.312867
TraesCS1A03G0781500	TraesCS1A03G0809500	0.299672
TraesCS1A03G0781500	TraesCS1B03G0654800	0.289766
TraesCS1A03G0781500	TraesCS1B03G1010000	0.30437
TraesCS1A03G0781500	TraesCS1D03G0282100	0.301047
TraesCS1A03G0781500	TraesCS1D03G0886200	0.299975
TraesCS1A03G0781500	TraesCS1D03G1012400	0.295351
TraesCS1A03G0781500	TraesCS2A03G0325900	0.321214
TraesCS1A03G0781500	TraesCS2A03G1241200	0.299004
TraesCS1A03G0781500	TraesCS2A03G1313500	0.319728
TraesCS1A03G0781500	TraesCS2B03G0026900	0.290037
TraesCS1A03G0781500	TraesCS2B03G0082600	0.304304
TraesCS1A03G0781500	TraesCS2B03G0949900	0.293058
TraesCS1A03G0781500	TraesCS2B03G1177400	0.289445
TraesCS1A03G0781500	TraesCS2B03G1218400	0.294357
TraesCS1A03G0781500	TraesCS2D03G0055600	0.301793
TraesCS1A03G0781500	TraesCS2D03G0269600	0.289044
TraesCS1A03G0781500	TraesCS3A03G0674500	0.297696
TraesCS1A03G0781500	TraesCS3B03G0141200	0.30116
TraesCS1A03G0781500	TraesCS3B03G0209700	0.292878
TraesCS1A03G0781500	TraesCS3B03G0987700	0.314804
TraesCS1A03G0781500	TraesCS3D03G0149900	0.320866
TraesCS1A03G0781500	TraesCS3D03G0983400	0.291987
TraesCS1A03G0781500	TraesCS4B03G0822600	0.313406
TraesCS1A03G0781500	TraesCS4B03G1005300	0.31188
TraesCS1A03G0781500	TraesCS4D03G0486700	0.308425
TraesCS1A03G0781500	TraesCS5A03G0211900	0.300474
TraesCS1A03G0781500	TraesCS5A03G0357300	0.290985
TraesCS1A03G0781500	TraesCS5A03G0434000	0.306551
TraesCS1A03G0781500	TraesCS5A03G0564700	0.317036
TraesCS1A03G0781500	TraesCS5A03G0564800	0.314745
TraesCS1A03G0781500	TraesCS5A03G0864400	0.305368
TraesCS1A03G0781500	TraesCS5A03G1094100	0.319452
TraesCS1A03G0781500	TraesCS5A03G1126300	0.314563
TraesCS1A03G0781500	TraesCS5B03G0429600	0.313646
TraesCS1A03G0781500	TraesCS5B03G1016400	0.303669
TraesCS1A03G0781500	TraesCS5B03G1138700	0.292071
TraesCS1A03G0781500	TraesCS5B03G1202400	0.3056
TraesCS1A03G0781500	TraesCS5B03G1309300	0.293896
TraesCS1A03G0781500	TraesCS5B03G1309400	0.307487
TraesCS1A03G0781500	TraesCS5D03G0829100	0.300583
TraesCS1A03G0781500	TraesCS5D03G0913900	0.313115
TraesCS1A03G0781500	TraesCS5D03G1052800	0.300069
TraesCS1A03G0781500	TraesCS5D03G1169700	0.290967
TraesCS1A03G0781500	TraesCS7A03G0941200	0.31186
TraesCS1A03G0781500	TraesCS7A03G1041100	0.300276
TraesCS1A03G0781500	TraesCS7A03G1064300	0.31123
TraesCS1A03G0781500	TraesCS7B03G0471200	0.296732
TraesCS1A03G0781500	TraesCS7B03G0888400	0.290262
TraesCS1A03G0781500	TraesCS7D03G0115600	0.305036
TraesCS1A03G0781500	TraesCS7D03G0126800	0.323003
TraesCS1A03G0781500	TraesCS7D03G0500500	0.309605
TraesCS1A03G0781500	TraesCS7D03G0732100	0.308637
TraesCS1A03G0781500	TraesCS7D03G0906100	0.300326
TraesCS1A03G0781500	TraesCS7D03G0991300	0.309565
TraesCS1A03G0781500	TraesCS7D03G1177500	0.30178
TraesCS1A03G0781500	TraesCSU03G0053700	0.295435
TraesCS1A03G0809500	TraesCS1A03G0986400	0.290931
TraesCS1A03G0809500	TraesCS1B03G1010000	0.332503
TraesCS1A03G0809500	TraesCS1D03G0282100	0.301696
TraesCS1A03G0809500	TraesCS1D03G0432700	0.310086
TraesCS1A03G0809500	TraesCS1D03G0886200	0.329404
TraesCS1A03G0809500	TraesCS1D03G1012400	0.318613
TraesCS1A03G0809500	TraesCS2A03G0325900	0.340738
TraesCS1A03G0809500	TraesCS2A03G0402700	0.293544
TraesCS1A03G0809500	TraesCS2A03G1241200	0.31168
TraesCS1A03G0809500	TraesCS2A03G1313500	0.329898
TraesCS1A03G0809500	TraesCS2B03G0026900	0.317002
TraesCS1A03G0809500	TraesCS2B03G0082600	0.30098
TraesCS1A03G0809500	TraesCS2B03G0480100	0.304716
TraesCS1A03G0809500	TraesCS2B03G0553100	0.304706
TraesCS1A03G0809500	TraesCS2B03G0949900	0.321535
TraesCS1A03G0809500	TraesCS2B03G1090200	0.309282
TraesCS1A03G0809500	TraesCS2B03G1177400	0.303181
TraesCS1A03G0809500	TraesCS2B03G1218400	0.298674
TraesCS1A03G0809500	TraesCS2B03G1308500	0.291552
TraesCS1A03G0809500	TraesCS2D03G0017900	0.299775
TraesCS1A03G0809500	TraesCS2D03G0055600	0.297811
TraesCS1A03G0809500	TraesCS2D03G0668700	0.298834
TraesCS1A03G0809500	TraesCS3A03G0166500	0.299825
TraesCS1A03G0809500	TraesCS3A03G0674500	0.306825
TraesCS1A03G0809500	TraesCS3A03G0864500	0.301438
TraesCS1A03G0809500	TraesCS3B03G0141200	0.306278
TraesCS1A03G0809500	TraesCS3B03G0209700	0.301945
TraesCS1A03G0809500	TraesCS3B03G0987700	0.343943
TraesCS1A03G0809500	TraesCS3D03G0149900	0.345857
TraesCS1A03G0809500	TraesCS3D03G0983400	0.323262
TraesCS1A03G0809500	TraesCS4A03G0180900	0.297548
TraesCS1A03G0809500	TraesCS4B03G0501400	0.291891
TraesCS1A03G0809500	TraesCS4B03G0822600	0.329463
TraesCS1A03G0809500	TraesCS4B03G1005300	0.313575
TraesCS1A03G0809500	TraesCS4D03G0115300	0.299522
TraesCS1A03G0809500	TraesCS4D03G0486700	0.334493
TraesCS1A03G0809500	TraesCS5A03G0211900	0.315154
TraesCS1A03G0809500	TraesCS5A03G0357300	0.309597
TraesCS1A03G0809500	TraesCS5A03G0434000	0.323472
TraesCS1A03G0809500	TraesCS5A03G0564700	0.321421
TraesCS1A03G0809500	TraesCS5A03G0564800	0.318576
TraesCS1A03G0809500	TraesCS5A03G0864400	0.326773
TraesCS1A03G0809500	TraesCS5A03G1094100	0.342533
TraesCS1A03G0809500	TraesCS5A03G1126300	0.339461
TraesCS1A03G0809500	TraesCS5B03G0429600	0.338654
TraesCS1A03G0809500	TraesCS5B03G1016400	0.304622
TraesCS1A03G0809500	TraesCS5B03G1138700	0.31332
TraesCS1A03G0809500	TraesCS5B03G1202400	0.324378
TraesCS1A03G0809500	TraesCS5B03G1309300	0.297818
TraesCS1A03G0809500	TraesCS5B03G1309400	0.335029
TraesCS1A03G0809500	TraesCS5D03G0038400	0.305653
TraesCS1A03G0809500	TraesCS5D03G0230900	0.293532
TraesCS1A03G0809500	TraesCS5D03G0829100	0.308464
TraesCS1A03G0809500	TraesCS5D03G0913900	0.324848
TraesCS1A03G0809500	TraesCS5D03G1052800	0.29584
TraesCS1A03G0809500	TraesCS5D03G1169700	0.318995
TraesCS1A03G0809500	TraesCS6D03G0785900	0.301457
TraesCS1A03G0809500	TraesCS7A03G0835900	0.298168
TraesCS1A03G0809500	TraesCS7A03G0941200	0.318245
TraesCS1A03G0809500	TraesCS7A03G1041100	0.304204
TraesCS1A03G0809500	TraesCS7A03G1064300	0.321992
TraesCS1A03G0809500	TraesCS7B03G0471200	0.319138
TraesCS1A03G0809500	TraesCS7B03G0888400	0.30934
TraesCS1A03G0809500	TraesCS7D03G0113400	0.29353
TraesCS1A03G0809500	TraesCS7D03G0115600	0.300844
TraesCS1A03G0809500	TraesCS7D03G0126800	0.339958
TraesCS1A03G0809500	TraesCS7D03G0500500	0.325217
TraesCS1A03G0809500	TraesCS7D03G0553900	0.302269
TraesCS1A03G0809500	TraesCS7D03G0593300	0.306613
TraesCS1A03G0809500	TraesCS7D03G0732100	0.325313
TraesCS1A03G0809500	TraesCS7D03G0789500	0.294416
TraesCS1A03G0809500	TraesCS7D03G0906100	0.303055
TraesCS1A03G0809500	TraesCS7D03G0991300	0.30874
TraesCS1A03G0809500	TraesCS7D03G1177500	0.30102
TraesCS1A03G0809500	TraesCSU03G0053700	0.293127
TraesCS1A03G0986400	TraesCS1B03G0654800	0.30707
TraesCS1A03G0986400	TraesCS1B03G1010000	0.335251
TraesCS1A03G0986400	TraesCS1D03G0886200	0.336895
TraesCS1A03G0986400	TraesCS1D03G0886300	0.314383
TraesCS1A03G0986400	TraesCS1D03G1012400	0.290248
TraesCS1A03G0986400	TraesCS2A03G0017800	0.304347
TraesCS1A03G0986400	TraesCS2A03G0325900	0.313759
TraesCS1A03G0986400	TraesCS2A03G0402700	0.303709
TraesCS1A03G0986400	TraesCS2A03G1313500	0.313277
TraesCS1A03G0986400	TraesCS2B03G0026900	0.293857
TraesCS1A03G0986400	TraesCS2B03G0514500	0.315934
TraesCS1A03G0986400	TraesCS2B03G0553100	0.292426
TraesCS1A03G0986400	TraesCS2B03G0949900	0.335622
TraesCS1A03G0986400	TraesCS2B03G1090200	0.299813
TraesCS1A03G0986400	TraesCS2B03G1177400	0.311005
TraesCS1A03G0986400	TraesCS2B03G1218400	0.294807
TraesCS1A03G0986400	TraesCS2B03G1308500	0.31865
TraesCS1A03G0986400	TraesCS2D03G0017900	0.311477
TraesCS1A03G0986400	TraesCS2D03G0055600	0.301007
TraesCS1A03G0986400	TraesCS2D03G0269600	0.294094
TraesCS1A03G0986400	TraesCS2D03G0668700	0.30517
TraesCS1A03G0986400	TraesCS2D03G0812700	0.312032
TraesCS1A03G0986400	TraesCS3A03G0166500	0.305867
TraesCS1A03G0986400	TraesCS3A03G0674500	0.322574
TraesCS1A03G0986400	TraesCS3A03G0864500	0.315966
TraesCS1A03G0986400	TraesCS3B03G0209700	0.317269
TraesCS1A03G0986400	TraesCS3B03G0987700	0.318313
TraesCS1A03G0986400	TraesCS3D03G0149900	0.322279
TraesCS1A03G0986400	TraesCS4A03G0180900	0.304631
TraesCS1A03G0986400	TraesCS4B03G0501400	0.319145
TraesCS1A03G0986400	TraesCS4B03G0822600	0.317643
TraesCS1A03G0986400	TraesCS4D03G0486700	0.324928
TraesCS1A03G0986400	TraesCS5A03G0211900	0.319831
TraesCS1A03G0986400	TraesCS5A03G0357300	0.304428
TraesCS1A03G0986400	TraesCS5A03G0434000	0.327813
TraesCS1A03G0986400	TraesCS5A03G0564700	0.295167
TraesCS1A03G0986400	TraesCS5A03G0864400	0.333624
TraesCS1A03G0986400	TraesCS5A03G1094100	0.325635
TraesCS1A03G0986400	TraesCS5A03G1126300	0.331536
TraesCS1A03G0986400	TraesCS5B03G0429600	0.338322
TraesCS1A03G0986400	TraesCS5B03G1138700	0.333191
TraesCS1A03G0986400	TraesCS5B03G1202400	0.328239
TraesCS1A03G0986400	TraesCS5B03G1309300	0.293761
TraesCS1A03G0986400	TraesCS5B03G1309400	0.336481
TraesCS1A03G0986400	TraesCS5D03G0038400	0.327406
TraesCS1A03G0986400	TraesCS5D03G0230900	0.317851
TraesCS1A03G0986400	TraesCS5D03G0829100	0.316272
TraesCS1A03G0986400	TraesCS5D03G0913900	0.295931
TraesCS1A03G0986400	TraesCS5D03G1052800	0.297499
TraesCS1A03G0986400	TraesCS5D03G1169700	0.323864
TraesCS1A03G0986400	TraesCS6B03G0350900	0.317762
TraesCS1A03G0986400	TraesCS7A03G0407600	0.293682
TraesCS1A03G0986400	TraesCS7A03G0835900	0.315422
TraesCS1A03G0986400	TraesCS7A03G1041100	0.321686
TraesCS1A03G0986400	TraesCS7A03G1064300	0.303476
TraesCS1A03G0986400	TraesCS7B03G0888400	0.333124
TraesCS1A03G0986400	TraesCS7D03G0069600	0.307422
TraesCS1A03G0986400	TraesCS7D03G0113400	0.324518
TraesCS1A03G0986400	TraesCS7D03G0126800	0.306917
TraesCS1A03G0986400	TraesCS7D03G0500500	0.332939
TraesCS1A03G0986400	TraesCS7D03G0553900	0.29239
TraesCS1A03G0986400	TraesCS7D03G0593300	0.311949
TraesCS1A03G0986400	TraesCS7D03G0732100	0.326242
TraesCS1A03G0986400	TraesCS7D03G0789500	0.299356
TraesCS1A03G0986400	TraesCS7D03G0906100	0.308744
TraesCS1A03G0986400	TraesCS7D03G1177500	0.297009
TraesCS1A03G0986400	TraesCSU03G0053700	0.289117
TraesCS1B03G0654800	TraesCS1B03G0717300	0.317792
TraesCS1B03G0654800	TraesCS1B03G1010000	0.290499
TraesCS1B03G0654800	TraesCS1D03G0282100	0.295201
TraesCS1B03G0654800	TraesCS1D03G0886300	0.305626
TraesCS1B03G0654800	TraesCS2A03G0017800	0.298503
TraesCS1B03G0654800	TraesCS2A03G0251900	0.292993
TraesCS1B03G0654800	TraesCS2A03G1313500	0.305617
TraesCS1B03G0654800	TraesCS2B03G0082600	0.303479
TraesCS1B03G0654800	TraesCS2B03G0514500	0.294787
TraesCS1B03G0654800	TraesCS2B03G0949900	0.289339
TraesCS1B03G0654800	TraesCS2B03G1177400	0.301675
TraesCS1B03G0654800	TraesCS2B03G1218400	0.303398
TraesCS1B03G0654800	TraesCS2B03G1308500	0.307415
TraesCS1B03G0654800	TraesCS2B03G1321000	0.321501
TraesCS1B03G0654800	TraesCS2D03G0017900	0.30143
TraesCS1B03G0654800	TraesCS2D03G0055600	0.313329
TraesCS1B03G0654800	TraesCS2D03G0269600	0.298481
TraesCS1B03G0654800	TraesCS2D03G0668700	0.29055
TraesCS1B03G0654800	TraesCS2D03G0812700	0.309077
TraesCS1B03G0654800	TraesCS3A03G0166500	0.298998
TraesCS1B03G0654800	TraesCS3A03G0674500	0.307262
TraesCS1B03G0654800	TraesCS3A03G0719100	0.306984
TraesCS1B03G0654800	TraesCS3B03G0209700	0.311025
TraesCS1B03G0654800	TraesCS4A03G0180900	0.307112
TraesCS1B03G0654800	TraesCS4B03G0501400	0.305077
TraesCS1B03G0654800	TraesCS4B03G1005300	0.292659
TraesCS1B03G0654800	TraesCS5A03G0211900	0.308676
TraesCS1B03G0654800	TraesCS5A03G0357300	0.293604
TraesCS1B03G0654800	TraesCS5A03G0434000	0.298016
TraesCS1B03G0654800	TraesCS5A03G0864400	0.300342
TraesCS1B03G0654800	TraesCS5B03G0429600	0.297569
TraesCS1B03G0654800	TraesCS5B03G1016400	0.297496
TraesCS1B03G0654800	TraesCS5B03G1138700	0.294656
TraesCS1B03G0654800	TraesCS5B03G1202400	0.308832
TraesCS1B03G0654800	TraesCS5B03G1309300	0.289058
TraesCS1B03G0654800	TraesCS5B03G1309400	0.292133
TraesCS1B03G0654800	TraesCS5D03G0038400	0.300021
TraesCS1B03G0654800	TraesCS5D03G0230900	0.312889
TraesCS1B03G0654800	TraesCS5D03G0829100	0.310369
TraesCS1B03G0654800	TraesCS5D03G1052800	0.31152
TraesCS1B03G0654800	TraesCS5D03G1235900	0.321224
TraesCS1B03G0654800	TraesCS6B03G0350900	0.305665
TraesCS1B03G0654800	TraesCS7A03G0407600	0.322007
TraesCS1B03G0654800	TraesCS7A03G0835900	0.307931
TraesCS1B03G0654800	TraesCS7A03G1041100	0.318635
TraesCS1B03G0654800	TraesCS7B03G0347800	0.294813
TraesCS1B03G0654800	TraesCS7B03G0888400	0.299051
TraesCS1B03G0654800	TraesCS7D03G0069600	0.296398
TraesCS1B03G0654800	TraesCS7D03G0113400	0.296801
TraesCS1B03G0654800	TraesCS7D03G0115600	0.303845
TraesCS1B03G0654800	TraesCS7D03G0500500	0.305374
TraesCS1B03G0654800	TraesCS7D03G0593300	0.298966
TraesCS1B03G0654800	TraesCS7D03G0732100	0.304985
TraesCS1B03G0654800	TraesCS7D03G0906100	0.312985
TraesCS1B03G0654800	TraesCS7D03G0960100	0.301226
TraesCS1B03G0654800	TraesCS7D03G0991300	0.298197
TraesCS1B03G0654800	TraesCS7D03G1177500	0.307437
TraesCS1B03G0654800	TraesCSU03G0053700	0.296205
TraesCS1B03G0717300	TraesCS1D03G0886300	0.294293
TraesCS1B03G0717300	TraesCS2A03G0017800	0.307728
TraesCS1B03G0717300	TraesCS2A03G0251900	0.317207
TraesCS1B03G0717300	TraesCS2B03G0514500	0.305106
TraesCS1B03G0717300	TraesCS2B03G1321000	0.319253
TraesCS1B03G0717300	TraesCS2D03G0269600	0.327849
TraesCS1B03G0717300	TraesCS3A03G0719100	0.341116
TraesCS1B03G0717300	TraesCS5B03G1309300	0.308805
TraesCS1B03G0717300	TraesCS5D03G1235900	0.334141
TraesCS1B03G0717300	TraesCS7A03G0407600	0.326184
TraesCS1B03G0717300	TraesCS7A03G0835900	0.296235
TraesCS1B03G0717300	TraesCS7B03G0347800	0.315704
TraesCS1B03G0717300	TraesCS7D03G0069600	0.302919
TraesCS1B03G0717300	TraesCS7D03G0960100	0.317483
TraesCS1B03G0717300	TraesCSU03G0053700	0.319793
TraesCS1B03G1010000	TraesCS1D03G0282100	0.307564
TraesCS1B03G1010000	TraesCS1D03G0432700	0.313692
TraesCS1B03G1010000	TraesCS1D03G0886200	0.347492
TraesCS1B03G1010000	TraesCS1D03G0886300	0.306166
TraesCS1B03G1010000	TraesCS1D03G1012400	0.324797
TraesCS1B03G1010000	TraesCS2A03G0017800	0.292981
TraesCS1B03G1010000	TraesCS2A03G0325900	0.338459
TraesCS1B03G1010000	TraesCS2A03G0402700	0.314997
TraesCS1B03G1010000	TraesCS2A03G1241200	0.302565
TraesCS1B03G1010000	TraesCS2A03G1313500	0.32912
TraesCS1B03G1010000	TraesCS2B03G0026900	0.33969
TraesCS1B03G1010000	TraesCS2B03G0082600	0.306262
TraesCS1B03G1010000	TraesCS2B03G0480100	0.317799
TraesCS1B03G1010000	TraesCS2B03G0514500	0.300453
TraesCS1B03G1010000	TraesCS2B03G0553100	0.323607
TraesCS1B03G1010000	TraesCS2B03G0949900	0.342987
TraesCS1B03G1010000	TraesCS2B03G1090200	0.327116
TraesCS1B03G1010000	TraesCS2B03G1177400	0.327189
TraesCS1B03G1010000	TraesCS2B03G1218400	0.317439
TraesCS1B03G1010000	TraesCS2B03G1308500	0.336071
TraesCS1B03G1010000	TraesCS2D03G0017900	0.326471
TraesCS1B03G1010000	TraesCS2D03G0055600	0.316693
TraesCS1B03G1010000	TraesCS2D03G0668700	0.328751
TraesCS1B03G1010000	TraesCS2D03G0812700	0.324234
TraesCS1B03G1010000	TraesCS3A03G0166500	0.327113
TraesCS1B03G1010000	TraesCS3A03G0674500	0.331284
TraesCS1B03G1010000	TraesCS3A03G0864500	0.329486
TraesCS1B03G1010000	TraesCS3B03G0141200	0.308077
TraesCS1B03G1010000	TraesCS3B03G0209700	0.330652
TraesCS1B03G1010000	TraesCS3B03G0987700	0.346167
TraesCS1B03G1010000	TraesCS3D03G0149900	0.34566
TraesCS1B03G1010000	TraesCS3D03G0983400	0.317554
TraesCS1B03G1010000	TraesCS4A03G0180900	0.330088
TraesCS1B03G1010000	TraesCS4B03G0501400	0.337954
TraesCS1B03G1010000	TraesCS4B03G0822600	0.339898
TraesCS1B03G1010000	TraesCS4B03G1005300	0.311859
TraesCS1B03G1010000	TraesCS4D03G0115300	0.296696
TraesCS1B03G1010000	TraesCS4D03G0486700	0.34535
TraesCS1B03G1010000	TraesCS5A03G0211900	0.337323
TraesCS1B03G1010000	TraesCS5A03G0357300	0.322173
TraesCS1B03G1010000	TraesCS5A03G0434000	0.340267
TraesCS1B03G1010000	TraesCS5A03G0564700	0.319732
TraesCS1B03G1010000	TraesCS5A03G0564800	0.313918
TraesCS1B03G1010000	TraesCS5A03G0864400	0.34123
TraesCS1B03G1010000	TraesCS5A03G1094100	0.345977
TraesCS1B03G1010000	TraesCS5A03G1126300	0.348314
TraesCS1B03G1010000	TraesCS5B03G0429600	0.346986
TraesCS1B03G1010000	TraesCS5B03G1016400	0.310595
TraesCS1B03G1010000	TraesCS5B03G1138700	0.344735
TraesCS1B03G1010000	TraesCS5B03G1202400	0.337117
TraesCS1B03G1010000	TraesCS5B03G1309300	0.292687
TraesCS1B03G1010000	TraesCS5B03G1309400	0.345508
TraesCS1B03G1010000	TraesCS5D03G0038400	0.344181
TraesCS1B03G1010000	TraesCS5D03G0230900	0.32851
TraesCS1B03G1010000	TraesCS5D03G0829100	0.335036
TraesCS1B03G1010000	TraesCS5D03G0913900	0.32302
TraesCS1B03G1010000	TraesCS5D03G1052800	0.310405
TraesCS1B03G1010000	TraesCS5D03G1169700	0.335564
TraesCS1B03G1010000	TraesCS6B03G0350900	0.333879
TraesCS1B03G1010000	TraesCS6D03G0785900	0.306909
TraesCS1B03G1010000	TraesCS7A03G0835900	0.318735
TraesCS1B03G1010000	TraesCS7A03G0941200	0.313392
TraesCS1B03G1010000	TraesCS7A03G1041100	0.333661
TraesCS1B03G1010000	TraesCS7A03G1064300	0.327711
TraesCS1B03G1010000	TraesCS7B03G0471200	0.332776
TraesCS1B03G1010000	TraesCS7B03G0888400	0.341243
TraesCS1B03G1010000	TraesCS7D03G0069600	0.302954
TraesCS1B03G1010000	TraesCS7D03G0113400	0.339881
TraesCS1B03G1010000	TraesCS7D03G0115600	0.305683
TraesCS1B03G1010000	TraesCS7D03G0126800	0.330009
TraesCS1B03G1010000	TraesCS7D03G0500500	0.339358
TraesCS1B03G1010000	TraesCS7D03G0553900	0.318104
TraesCS1B03G1010000	TraesCS7D03G0593300	0.320608
TraesCS1B03G1010000	TraesCS7D03G0732100	0.332809
TraesCS1B03G1010000	TraesCS7D03G0789500	0.312926
TraesCS1B03G1010000	TraesCS7D03G0906100	0.329678
TraesCS1B03G1010000	TraesCS7D03G0991300	0.318706
TraesCS1B03G1010000	TraesCS7D03G1177500	0.31527
TraesCS1D03G0282100	TraesCS1D03G0886200	0.300488
TraesCS1D03G0282100	TraesCS1D03G1012400	0.294283
TraesCS1D03G0282100	TraesCS2A03G0325900	0.31454
TraesCS1D03G0282100	TraesCS2A03G1241200	0.290874
TraesCS1D03G0282100	TraesCS2A03G1313500	0.322964
TraesCS1D03G0282100	TraesCS2B03G0026900	0.29919
TraesCS1D03G0282100	TraesCS2B03G0082600	0.299233
TraesCS1D03G0282100	TraesCS2B03G0949900	0.295131
TraesCS1D03G0282100	TraesCS2B03G1177400	0.294415
TraesCS1D03G0282100	TraesCS2B03G1218400	0.299029
TraesCS1D03G0282100	TraesCS2D03G0055600	0.305772
TraesCS1D03G0282100	TraesCS2D03G0269600	0.293151
TraesCS1D03G0282100	TraesCS3A03G0674500	0.306656
TraesCS1D03G0282100	TraesCS3B03G0141200	0.298637
TraesCS1D03G0282100	TraesCS3B03G0209700	0.296459
TraesCS1D03G0282100	TraesCS3B03G0987700	0.306289
TraesCS1D03G0282100	TraesCS3D03G0149900	0.31457
TraesCS1D03G0282100	TraesCS4A03G0180900	0.300438
TraesCS1D03G0282100	TraesCS4B03G0822600	0.313237
TraesCS1D03G0282100	TraesCS4B03G1005300	0.313983
TraesCS1D03G0282100	TraesCS4D03G0486700	0.305749
TraesCS1D03G0282100	TraesCS5A03G0211900	0.30751
TraesCS1D03G0282100	TraesCS5A03G0357300	0.298981
TraesCS1D03G0282100	TraesCS5A03G0434000	0.312688
TraesCS1D03G0282100	TraesCS5A03G0564700	0.316862
TraesCS1D03G0282100	TraesCS5A03G0564800	0.313145
TraesCS1D03G0282100	TraesCS5A03G0864400	0.309127
TraesCS1D03G0282100	TraesCS5A03G1094100	0.316255
TraesCS1D03G0282100	TraesCS5A03G1126300	0.312905
TraesCS1D03G0282100	TraesCS5B03G0429600	0.31444
TraesCS1D03G0282100	TraesCS5B03G1016400	0.306634
TraesCS1D03G0282100	TraesCS5B03G1138700	0.29925
TraesCS1D03G0282100	TraesCS5B03G1202400	0.311568
TraesCS1D03G0282100	TraesCS5B03G1309300	0.288996
TraesCS1D03G0282100	TraesCS5B03G1309400	0.30747
TraesCS1D03G0282100	TraesCS5D03G0038400	0.295008
TraesCS1D03G0282100	TraesCS5D03G0230900	0.293355
TraesCS1D03G0282100	TraesCS5D03G0829100	0.306942
TraesCS1D03G0282100	TraesCS5D03G0913900	0.30988
TraesCS1D03G0282100	TraesCS5D03G1052800	0.296506
TraesCS1D03G0282100	TraesCS5D03G1169700	0.292166
TraesCS1D03G0282100	TraesCS7A03G0835900	0.289601
TraesCS1D03G0282100	TraesCS7A03G0941200	0.312124
TraesCS1D03G0282100	TraesCS7A03G1041100	0.307092
TraesCS1D03G0282100	TraesCS7A03G1064300	0.31368
TraesCS1D03G0282100	TraesCS7B03G0471200	0.291881
TraesCS1D03G0282100	TraesCS7B03G0888400	0.298566
TraesCS1D03G0282100	TraesCS7D03G0115600	0.299906
TraesCS1D03G0282100	TraesCS7D03G0126800	0.31661
TraesCS1D03G0282100	TraesCS7D03G0500500	0.31536
TraesCS1D03G0282100	TraesCS7D03G0593300	0.291018
TraesCS1D03G0282100	TraesCS7D03G0732100	0.31249
TraesCS1D03G0282100	TraesCS7D03G0906100	0.311701
TraesCS1D03G0282100	TraesCS7D03G0991300	0.312926
TraesCS1D03G0282100	TraesCS7D03G1177500	0.299473
TraesCS1D03G0282100	TraesCSU03G0053700	0.292727
TraesCS1D03G0432700	TraesCS1D03G0886200	0.313846
TraesCS1D03G0432700	TraesCS1D03G1012400	0.318318
TraesCS1D03G0432700	TraesCS2A03G0325900	0.326514
TraesCS1D03G0432700	TraesCS2A03G1313500	0.325724
TraesCS1D03G0432700	TraesCS2B03G0026900	0.294367
TraesCS1D03G0432700	TraesCS2B03G0082600	0.299314
TraesCS1D03G0432700	TraesCS2B03G0480100	0.297201
TraesCS1D03G0432700	TraesCS2B03G0949900	0.309754
TraesCS1D03G0432700	TraesCS2B03G1090200	0.304837
TraesCS1D03G0432700	TraesCS2B03G1177400	0.310492
TraesCS1D03G0432700	TraesCS2D03G0055600	0.306568
TraesCS1D03G0432700	TraesCS3A03G0166500	0.29553
TraesCS1D03G0432700	TraesCS3A03G0674500	0.2982
TraesCS1D03G0432700	TraesCS3B03G0141200	0.305329
TraesCS1D03G0432700	TraesCS3B03G0209700	0.304527
TraesCS1D03G0432700	TraesCS3B03G0987700	0.329992
TraesCS1D03G0432700	TraesCS3D03G0149900	0.332736
TraesCS1D03G0432700	TraesCS3D03G0983400	0.313036
TraesCS1D03G0432700	TraesCS4B03G0822600	0.311781
TraesCS1D03G0432700	TraesCS4B03G1005300	0.311008
TraesCS1D03G0432700	TraesCS4D03G0115300	0.293557
TraesCS1D03G0432700	TraesCS4D03G0486700	0.319593
TraesCS1D03G0432700	TraesCS5A03G0211900	0.316692
TraesCS1D03G0432700	TraesCS5A03G0357300	0.289641
TraesCS1D03G0432700	TraesCS5A03G0434000	0.307413
TraesCS1D03G0432700	TraesCS5A03G0564700	0.31639
TraesCS1D03G0432700	TraesCS5A03G0564800	0.318472
TraesCS1D03G0432700	TraesCS5A03G0864400	0.318476
TraesCS1D03G0432700	TraesCS5A03G1094100	0.324944
TraesCS1D03G0432700	TraesCS5A03G1126300	0.321494
TraesCS1D03G0432700	TraesCS5B03G0429600	0.324751
TraesCS1D03G0432700	TraesCS5B03G1016400	0.311818
TraesCS1D03G0432700	TraesCS5B03G1138700	0.299808
TraesCS1D03G0432700	TraesCS5B03G1202400	0.321912
TraesCS1D03G0432700	TraesCS5B03G1309300	0.289807
TraesCS1D03G0432700	TraesCS5B03G1309400	0.322427
TraesCS1D03G0432700	TraesCS5D03G0038400	0.289846
TraesCS1D03G0432700	TraesCS5D03G0230900	0.295128
TraesCS1D03G0432700	TraesCS5D03G0829100	0.312201
TraesCS1D03G0432700	TraesCS5D03G0913900	0.32286
TraesCS1D03G0432700	TraesCS5D03G1052800	0.292885
TraesCS1D03G0432700	TraesCS5D03G1169700	0.314405
TraesCS1D03G0432700	TraesCS6D03G0785900	0.289586
TraesCS1D03G0432700	TraesCS7A03G0835900	0.290573
TraesCS1D03G0432700	TraesCS7A03G0941200	0.308962
TraesCS1D03G0432700	TraesCS7A03G1041100	0.304428
TraesCS1D03G0432700	TraesCS7A03G1064300	0.305702
TraesCS1D03G0432700	TraesCS7B03G0471200	0.30294
TraesCS1D03G0432700	TraesCS7B03G0888400	0.296194
TraesCS1D03G0432700	TraesCS7D03G0126800	0.329627
TraesCS1D03G0432700	TraesCS7D03G0500500	0.314983
TraesCS1D03G0432700	TraesCS7D03G0553900	0.291204
TraesCS1D03G0432700	TraesCS7D03G0732100	0.317467
TraesCS1D03G0432700	TraesCS7D03G0906100	0.30072
TraesCS1D03G0432700	TraesCS7D03G0991300	0.307822
TraesCS1D03G0432700	TraesCS7D03G1177500	0.306248
TraesCS1D03G0432700	TraesCSU03G0053700	0.290718
TraesCS1D03G0886200	TraesCS1D03G0886300	0.302115
TraesCS1D03G0886200	TraesCS1D03G1012400	0.327068
TraesCS1D03G0886200	TraesCS2A03G0017800	0.292687
TraesCS1D03G0886200	TraesCS2A03G0325900	0.335982
TraesCS1D03G0886200	TraesCS2A03G0402700	0.31884
TraesCS1D03G0886200	TraesCS2A03G1241200	0.293951
TraesCS1D03G0886200	TraesCS2A03G1313500	0.330174
TraesCS1D03G0886200	TraesCS2B03G0026900	0.335228
TraesCS1D03G0886200	TraesCS2B03G0082600	0.304495
TraesCS1D03G0886200	TraesCS2B03G0480100	0.319851
TraesCS1D03G0886200	TraesCS2B03G0514500	0.301167
TraesCS1D03G0886200	TraesCS2B03G0553100	0.321196
TraesCS1D03G0886200	TraesCS2B03G0949900	0.344147
TraesCS1D03G0886200	TraesCS2B03G1090200	0.332251
TraesCS1D03G0886200	TraesCS2B03G1177400	0.331305
TraesCS1D03G0886200	TraesCS2B03G1218400	0.313312
TraesCS1D03G0886200	TraesCS2B03G1308500	0.336877
TraesCS1D03G0886200	TraesCS2D03G0017900	0.323143
TraesCS1D03G0886200	TraesCS2D03G0055600	0.317071
TraesCS1D03G0886200	TraesCS2D03G0668700	0.331252
TraesCS1D03G0886200	TraesCS2D03G0812700	0.326026
TraesCS1D03G0886200	TraesCS3A03G0166500	0.329957
TraesCS1D03G0886200	TraesCS3A03G0674500	0.331812
TraesCS1D03G0886200	TraesCS3A03G0864500	0.333915
TraesCS1D03G0886200	TraesCS3B03G0141200	0.305966
TraesCS1D03G0886200	TraesCS3B03G0209700	0.332629
TraesCS1D03G0886200	TraesCS3B03G0987700	0.345862
TraesCS1D03G0886200	TraesCS3D03G0149900	0.344261
TraesCS1D03G0886200	TraesCS3D03G0983400	0.31897
TraesCS1D03G0886200	TraesCS4A03G0180900	0.326621
TraesCS1D03G0886200	TraesCS4B03G0501400	0.338853
TraesCS1D03G0886200	TraesCS4B03G0822600	0.333622
TraesCS1D03G0886200	TraesCS4B03G1005300	0.309952
TraesCS1D03G0886200	TraesCS4D03G0115300	0.295971
TraesCS1D03G0886200	TraesCS4D03G0486700	0.342117
TraesCS1D03G0886200	TraesCS5A03G0211900	0.338757
TraesCS1D03G0886200	TraesCS5A03G0357300	0.321626
TraesCS1D03G0886200	TraesCS5A03G0434000	0.340359
TraesCS1D03G0886200	TraesCS5A03G0564700	0.318844
TraesCS1D03G0886200	TraesCS5A03G0564800	0.313331
TraesCS1D03G0886200	TraesCS5A03G0864400	0.344634
TraesCS1D03G0886200	TraesCS5A03G1094100	0.343092
TraesCS1D03G0886200	TraesCS5A03G1126300	0.346001
TraesCS1D03G0886200	TraesCS5B03G0429600	0.349616
TraesCS1D03G0886200	TraesCS5B03G1016400	0.309429
TraesCS1D03G0886200	TraesCS5B03G1138700	0.347388
TraesCS1D03G0886200	TraesCS5B03G1202400	0.341054
TraesCS1D03G0886200	TraesCS5B03G1309300	0.290852
TraesCS1D03G0886200	TraesCS5B03G1309400	0.347288
TraesCS1D03G0886200	TraesCS5D03G0038400	0.345454
TraesCS1D03G0886200	TraesCS5D03G0230900	0.330176
TraesCS1D03G0886200	TraesCS5D03G0829100	0.336258
TraesCS1D03G0886200	TraesCS5D03G0913900	0.324318
TraesCS1D03G0886200	TraesCS5D03G1052800	0.309819
TraesCS1D03G0886200	TraesCS5D03G1169700	0.340835
TraesCS1D03G0886200	TraesCS6B03G0350900	0.33591
TraesCS1D03G0886200	TraesCS6D03G0785900	0.309156
TraesCS1D03G0886200	TraesCS7A03G0835900	0.318814
TraesCS1D03G0886200	TraesCS7A03G0941200	0.311484
TraesCS1D03G0886200	TraesCS7A03G1041100	0.333962
TraesCS1D03G0886200	TraesCS7A03G1064300	0.326195
TraesCS1D03G0886200	TraesCS7B03G0471200	0.330423
TraesCS1D03G0886200	TraesCS7B03G0888400	0.343892
TraesCS1D03G0886200	TraesCS7D03G0069600	0.304243
TraesCS1D03G0886200	TraesCS7D03G0113400	0.342823
TraesCS1D03G0886200	TraesCS7D03G0115600	0.301352
TraesCS1D03G0886200	TraesCS7D03G0126800	0.326966
TraesCS1D03G0886200	TraesCS7D03G0500500	0.340842
TraesCS1D03G0886200	TraesCS7D03G0553900	0.323821
TraesCS1D03G0886200	TraesCS7D03G0593300	0.31592
TraesCS1D03G0886200	TraesCS7D03G0732100	0.33618
TraesCS1D03G0886200	TraesCS7D03G0789500	0.316304
TraesCS1D03G0886200	TraesCS7D03G0906100	0.327971
TraesCS1D03G0886200	TraesCS7D03G0991300	0.314472
TraesCS1D03G0886200	TraesCS7D03G1177500	0.315827
TraesCS1D03G0886300	TraesCS2A03G0017800	0.291303
TraesCS1D03G0886300	TraesCS2A03G1313500	0.306854
TraesCS1D03G0886300	TraesCS2B03G0082600	0.292276
TraesCS1D03G0886300	TraesCS2B03G0514500	0.296823
TraesCS1D03G0886300	TraesCS2B03G0949900	0.303472
TraesCS1D03G0886300	TraesCS2B03G1177400	0.301473
TraesCS1D03G0886300	TraesCS2B03G1218400	0.299236
TraesCS1D03G0886300	TraesCS2B03G1308500	0.316094
TraesCS1D03G0886300	TraesCS2B03G1321000	0.304859
TraesCS1D03G0886300	TraesCS2D03G0017900	0.302996
TraesCS1D03G0886300	TraesCS2D03G0055600	0.308064
TraesCS1D03G0886300	TraesCS2D03G0269600	0.29922
TraesCS1D03G0886300	TraesCS2D03G0668700	0.289954
TraesCS1D03G0886300	TraesCS2D03G0812700	0.312967
TraesCS1D03G0886300	TraesCS3A03G0166500	0.297379
TraesCS1D03G0886300	TraesCS3A03G0674500	0.315459
TraesCS1D03G0886300	TraesCS3A03G0864500	0.294691
TraesCS1D03G0886300	TraesCS3B03G0209700	0.311212
TraesCS1D03G0886300	TraesCS3D03G0149900	0.291814
TraesCS1D03G0886300	TraesCS4A03G0180900	0.311284
TraesCS1D03G0886300	TraesCS4B03G0501400	0.313421
TraesCS1D03G0886300	TraesCS4B03G0822600	0.296164
TraesCS1D03G0886300	TraesCS4D03G0486700	0.292323
TraesCS1D03G0886300	TraesCS5A03G0211900	0.311152
TraesCS1D03G0886300	TraesCS5A03G0357300	0.298783
TraesCS1D03G0886300	TraesCS5A03G0434000	0.310649
TraesCS1D03G0886300	TraesCS5A03G0564700	0.28956
TraesCS1D03G0886300	TraesCS5A03G0864400	0.310645
TraesCS1D03G0886300	TraesCS5A03G1094100	0.297066
TraesCS1D03G0886300	TraesCS5A03G1126300	0.300624
TraesCS1D03G0886300	TraesCS5B03G0429600	0.31018
TraesCS1D03G0886300	TraesCS5B03G1138700	0.309939
TraesCS1D03G0886300	TraesCS5B03G1202400	0.314423
TraesCS1D03G0886300	TraesCS5B03G1309400	0.305109
TraesCS1D03G0886300	TraesCS5D03G0038400	0.313435
TraesCS1D03G0886300	TraesCS5D03G0230900	0.315955
TraesCS1D03G0886300	TraesCS5D03G0829100	0.311962
TraesCS1D03G0886300	TraesCS5D03G1052800	0.303089
TraesCS1D03G0886300	TraesCS5D03G1169700	0.296052
TraesCS1D03G0886300	TraesCS5D03G1235900	0.307093
TraesCS1D03G0886300	TraesCS6B03G0350900	0.312778
TraesCS1D03G0886300	TraesCS7A03G0407600	0.315182
TraesCS1D03G0886300	TraesCS7A03G0835900	0.301904
TraesCS1D03G0886300	TraesCS7A03G1041100	0.320616
TraesCS1D03G0886300	TraesCS7A03G1064300	0.294142
TraesCS1D03G0886300	TraesCS7B03G0888400	0.313544
TraesCS1D03G0886300	TraesCS7D03G0113400	0.307847
TraesCS1D03G0886300	TraesCS7D03G0115600	0.292571
TraesCS1D03G0886300	TraesCS7D03G0500500	0.316285
TraesCS1D03G0886300	TraesCS7D03G0593300	0.294267
TraesCS1D03G0886300	TraesCS7D03G0732100	0.310942
TraesCS1D03G0886300	TraesCS7D03G0906100	0.314206
TraesCS1D03G0886300	TraesCS7D03G0991300	0.293393
TraesCS1D03G0886300	TraesCS7D03G1177500	0.299056
TraesCS1D03G0886300	TraesCSU03G0053700	0.291673
TraesCS1D03G1012400	TraesCS2A03G0325900	0.339698
TraesCS1D03G1012400	TraesCS2A03G0402700	0.301344
TraesCS1D03G1012400	TraesCS2A03G1241200	0.298883
TraesCS1D03G1012400	TraesCS2A03G1313500	0.322478
TraesCS1D03G1012400	TraesCS2B03G0026900	0.310004
TraesCS1D03G1012400	TraesCS2B03G0082600	0.30373
TraesCS1D03G1012400	TraesCS2B03G0480100	0.31325
TraesCS1D03G1012400	TraesCS2B03G0553100	0.297962
TraesCS1D03G1012400	TraesCS2B03G0949900	0.319568
TraesCS1D03G1012400	TraesCS2B03G1090200	0.30884
TraesCS1D03G1012400	TraesCS2B03G1177400	0.308762
TraesCS1D03G1012400	TraesCS2B03G1218400	0.294845
TraesCS1D03G1012400	TraesCS2D03G0017900	0.294473
TraesCS1D03G1012400	TraesCS2D03G0055600	0.305191
TraesCS1D03G1012400	TraesCS2D03G0668700	0.306751
TraesCS1D03G1012400	TraesCS3A03G0166500	0.305659
TraesCS1D03G1012400	TraesCS3A03G0674500	0.295476
TraesCS1D03G1012400	TraesCS3A03G0864500	0.292448
TraesCS1D03G1012400	TraesCS3B03G0141200	0.31108
TraesCS1D03G1012400	TraesCS3B03G0209700	0.309441
TraesCS1D03G1012400	TraesCS3B03G0987700	0.346657
TraesCS1D03G1012400	TraesCS3D03G0149900	0.346076
TraesCS1D03G1012400	TraesCS3D03G0983400	0.320332
TraesCS1D03G1012400	TraesCS4B03G0822600	0.322121
TraesCS1D03G1012400	TraesCS4B03G1005300	0.30251
TraesCS1D03G1012400	TraesCS4D03G0115300	0.307575
TraesCS1D03G1012400	TraesCS4D03G0486700	0.333788
TraesCS1D03G1012400	TraesCS5A03G0211900	0.321021
TraesCS1D03G1012400	TraesCS5A03G0357300	0.29767
TraesCS1D03G1012400	TraesCS5A03G0434000	0.312361
TraesCS1D03G1012400	TraesCS5A03G0564700	0.315211
TraesCS1D03G1012400	TraesCS5A03G0564800	0.313996
TraesCS1D03G1012400	TraesCS5A03G0864400	0.323305
TraesCS1D03G1012400	TraesCS5A03G1094100	0.338499
TraesCS1D03G1012400	TraesCS5A03G1126300	0.335484
TraesCS1D03G1012400	TraesCS5B03G0429600	0.334445
TraesCS1D03G1012400	TraesCS5B03G1016400	0.308244
TraesCS1D03G1012400	TraesCS5B03G1138700	0.306187
TraesCS1D03G1012400	TraesCS5B03G1202400	0.322687
TraesCS1D03G1012400	TraesCS5B03G1309300	0.300129
TraesCS1D03G1012400	TraesCS5B03G1309400	0.333421
TraesCS1D03G1012400	TraesCS5D03G0038400	0.293002
TraesCS1D03G1012400	TraesCS5D03G0230900	0.297342
TraesCS1D03G1012400	TraesCS5D03G0829100	0.316153
TraesCS1D03G1012400	TraesCS5D03G0913900	0.324502
TraesCS1D03G1012400	TraesCS5D03G1052800	0.298303
TraesCS1D03G1012400	TraesCS5D03G1169700	0.320049
TraesCS1D03G1012400	TraesCS6D03G0785900	0.313244
TraesCS1D03G1012400	TraesCS7A03G0835900	0.297373
TraesCS1D03G1012400	TraesCS7A03G0941200	0.307321
TraesCS1D03G1012400	TraesCS7A03G1041100	0.308016
TraesCS1D03G1012400	TraesCS7A03G1064300	0.308925
TraesCS1D03G1012400	TraesCS7B03G0471200	0.32088
TraesCS1D03G1012400	TraesCS7B03G0888400	0.300238
TraesCS1D03G1012400	TraesCS7D03G0069600	0.290826
TraesCS1D03G1012400	TraesCS7D03G0115600	0.298594
TraesCS1D03G1012400	TraesCS7D03G0126800	0.338371
TraesCS1D03G1012400	TraesCS7D03G0500500	0.318322
TraesCS1D03G1012400	TraesCS7D03G0553900	0.306564
TraesCS1D03G1012400	TraesCS7D03G0593300	0.297478
TraesCS1D03G1012400	TraesCS7D03G0732100	0.317275
TraesCS1D03G1012400	TraesCS7D03G0789500	0.302284
TraesCS1D03G1012400	TraesCS7D03G0906100	0.299908
TraesCS1D03G1012400	TraesCS7D03G0991300	0.309183
TraesCS1D03G1012400	TraesCS7D03G1177500	0.308164
TraesCS1D03G1012400	TraesCSU03G0053700	0.291856
TraesCS2A03G0017800	TraesCS2A03G1313500	0.298148
TraesCS2A03G0017800	TraesCS2B03G0082600	0.291833
TraesCS2A03G0017800	TraesCS2B03G0514500	0.298462
TraesCS2A03G0017800	TraesCS2B03G0949900	0.297099
TraesCS2A03G0017800	TraesCS2B03G1177400	0.302297
TraesCS2A03G0017800	TraesCS2B03G1308500	0.303765
TraesCS2A03G0017800	TraesCS2B03G1321000	0.308626
TraesCS2A03G0017800	TraesCS2D03G0017900	0.291561
TraesCS2A03G0017800	TraesCS2D03G0055600	0.306002
TraesCS2A03G0017800	TraesCS2D03G0269600	0.297105
TraesCS2A03G0017800	TraesCS2D03G0812700	0.307673
TraesCS2A03G0017800	TraesCS3A03G0166500	0.298728
TraesCS2A03G0017800	TraesCS3A03G0674500	0.303495
TraesCS2A03G0017800	TraesCS3A03G0719100	0.292485
TraesCS2A03G0017800	TraesCS3A03G0864500	0.293775
TraesCS2A03G0017800	TraesCS3B03G0209700	0.308834
TraesCS2A03G0017800	TraesCS4A03G0180900	0.295351
TraesCS2A03G0017800	TraesCS4B03G0501400	0.302089
TraesCS2A03G0017800	TraesCS5A03G0211900	0.304793
TraesCS2A03G0017800	TraesCS5A03G0357300	0.289591
TraesCS2A03G0017800	TraesCS5A03G0434000	0.294247
TraesCS2A03G0017800	TraesCS5A03G0864400	0.30043
TraesCS2A03G0017800	TraesCS5B03G0429600	0.300513
TraesCS2A03G0017800	TraesCS5B03G1138700	0.295266
TraesCS2A03G0017800	TraesCS5B03G1202400	0.308777
TraesCS2A03G0017800	TraesCS5B03G1309400	0.297153
TraesCS2A03G0017800	TraesCS5D03G0038400	0.298035
TraesCS2A03G0017800	TraesCS5D03G0230900	0.312481
TraesCS2A03G0017800	TraesCS5D03G0829100	0.304634
TraesCS2A03G0017800	TraesCS5D03G1052800	0.300929
TraesCS2A03G0017800	TraesCS5D03G1169700	0.294147
TraesCS2A03G0017800	TraesCS5D03G1235900	0.314241
TraesCS2A03G0017800	TraesCS6B03G0350900	0.303585
TraesCS2A03G0017800	TraesCS7A03G0407600	0.318658
TraesCS2A03G0017800	TraesCS7A03G0835900	0.301095
TraesCS2A03G0017800	TraesCS7A03G1041100	0.311634
TraesCS2A03G0017800	TraesCS7B03G0888400	0.29991
TraesCS2A03G0017800	TraesCS7D03G0069600	0.291194
TraesCS2A03G0017800	TraesCS7D03G0113400	0.296465
TraesCS2A03G0017800	TraesCS7D03G0500500	0.302998
TraesCS2A03G0017800	TraesCS7D03G0593300	0.289756
TraesCS2A03G0017800	TraesCS7D03G0732100	0.303593
TraesCS2A03G0017800	TraesCS7D03G0906100	0.300613
TraesCS2A03G0017800	TraesCS7D03G1177500	0.299564
TraesCS2A03G0017800	TraesCSU03G0053700	0.296102
TraesCS2A03G0251900	TraesCS2B03G0514500	0.289709
TraesCS2A03G0251900	TraesCS2D03G0269600	0.300289
TraesCS2A03G0251900	TraesCS3A03G0719100	0.305081
TraesCS2A03G0251900	TraesCS5B03G1309300	0.305595
TraesCS2A03G0251900	TraesCS5D03G1235900	0.301568
TraesCS2A03G0251900	TraesCS7A03G0407600	0.289929
TraesCS2A03G0251900	TraesCS7D03G0069600	0.293361
TraesCS2A03G0251900	TraesCSU03G0053700	0.309814
TraesCS2A03G0325900	TraesCS2A03G0402700	0.30516
TraesCS2A03G0325900	TraesCS2A03G1241200	0.30598
TraesCS2A03G0325900	TraesCS2A03G1313500	0.33892
TraesCS2A03G0325900	TraesCS2B03G0026900	0.3414
TraesCS2A03G0325900	TraesCS2B03G0082600	0.317931
TraesCS2A03G0325900	TraesCS2B03G0480100	0.332986
TraesCS2A03G0325900	TraesCS2B03G0553100	0.31646
TraesCS2A03G0325900	TraesCS2B03G0949900	0.331176
TraesCS2A03G0325900	TraesCS2B03G1090200	0.327653
TraesCS2A03G0325900	TraesCS2B03G1177400	0.326336
TraesCS2A03G0325900	TraesCS2B03G1218400	0.319241
TraesCS2A03G0325900	TraesCS2B03G1308500	0.313958
TraesCS2A03G0325900	TraesCS2D03G0017900	0.313045
TraesCS2A03G0325900	TraesCS2D03G0055600	0.320658
TraesCS2A03G0325900	TraesCS2D03G0668700	0.325337
TraesCS2A03G0325900	TraesCS2D03G0812700	0.305325
TraesCS2A03G0325900	TraesCS3A03G0166500	0.318411
TraesCS2A03G0325900	TraesCS3A03G0674500	0.324106
TraesCS2A03G0325900	TraesCS3A03G0864500	0.316765
TraesCS2A03G0325900	TraesCS3B03G0141200	0.329339
TraesCS2A03G0325900	TraesCS3B03G0209700	0.322235
TraesCS2A03G0325900	TraesCS3B03G0987700	0.347652
TraesCS2A03G0325900	TraesCS3D03G0149900	0.348113
TraesCS2A03G0325900	TraesCS3D03G0983400	0.341647
TraesCS2A03G0325900	TraesCS4A03G0180900	0.318975
TraesCS2A03G0325900	TraesCS4B03G0501400	0.313116
TraesCS2A03G0325900	TraesCS4B03G0822600	0.340451
TraesCS2A03G0325900	TraesCS4B03G1005300	0.331555
TraesCS2A03G0325900	TraesCS4D03G0115300	0.323485
TraesCS2A03G0325900	TraesCS4D03G0486700	0.343208
TraesCS2A03G0325900	TraesCS5A03G0211900	0.33454
TraesCS2A03G0325900	TraesCS5A03G0357300	0.323724
TraesCS2A03G0325900	TraesCS5A03G0434000	0.336658
TraesCS2A03G0325900	TraesCS5A03G0564700	0.338648
TraesCS2A03G0325900	TraesCS5A03G0564800	0.337172
TraesCS2A03G0325900	TraesCS5A03G0864400	0.338001
TraesCS2A03G0325900	TraesCS5A03G1094100	0.345705
TraesCS2A03G0325900	TraesCS5A03G1126300	0.343674
TraesCS2A03G0325900	TraesCS5B03G0429600	0.343776
TraesCS2A03G0325900	TraesCS5B03G1016400	0.328037
TraesCS2A03G0325900	TraesCS5B03G1138700	0.333102
TraesCS2A03G0325900	TraesCS5B03G1202400	0.334233
TraesCS2A03G0325900	TraesCS5B03G1309300	0.294698
TraesCS2A03G0325900	TraesCS5B03G1309400	0.339695
TraesCS2A03G0325900	TraesCS5D03G0038400	0.326762
TraesCS2A03G0325900	TraesCS5D03G0230900	0.314037
TraesCS2A03G0325900	TraesCS5D03G0829100	0.332623
TraesCS2A03G0325900	TraesCS5D03G0913900	0.343314
TraesCS2A03G0325900	TraesCS5D03G1052800	0.312631
TraesCS2A03G0325900	TraesCS5D03G1169700	0.332458
TraesCS2A03G0325900	TraesCS6B03G0350900	0.310977
TraesCS2A03G0325900	TraesCS6D03G0785900	0.320349
TraesCS2A03G0325900	TraesCS7A03G0835900	0.303108
TraesCS2A03G0325900	TraesCS7A03G0941200	0.335314
TraesCS2A03G0325900	TraesCS7A03G1041100	0.324704
TraesCS2A03G0325900	TraesCS7A03G1064300	0.33807
TraesCS2A03G0325900	TraesCS7B03G0471200	0.340289
TraesCS2A03G0325900	TraesCS7B03G0888400	0.328012
TraesCS2A03G0325900	TraesCS7D03G0069600	0.289918
TraesCS2A03G0325900	TraesCS7D03G0113400	0.315294
TraesCS2A03G0325900	TraesCS7D03G0115600	0.31375
TraesCS2A03G0325900	TraesCS7D03G0126800	0.342198
TraesCS2A03G0325900	TraesCS7D03G0500500	0.336376
TraesCS2A03G0325900	TraesCS7D03G0553900	0.320582
TraesCS2A03G0325900	TraesCS7D03G0593300	0.30503
TraesCS2A03G0325900	TraesCS7D03G0732100	0.331895
TraesCS2A03G0325900	TraesCS7D03G0789500	0.307153
TraesCS2A03G0325900	TraesCS7D03G0906100	0.327906
TraesCS2A03G0325900	TraesCS7D03G0991300	0.332784
TraesCS2A03G0325900	TraesCS7D03G1177500	0.32156
TraesCS2A03G0402700	TraesCS2A03G1313500	0.310807
TraesCS2A03G0402700	TraesCS2B03G0082600	0.289031
TraesCS2A03G0402700	TraesCS2B03G0514500	0.295386
TraesCS2A03G0402700	TraesCS2B03G0949900	0.320284
TraesCS2A03G0402700	TraesCS2B03G1090200	0.307746
TraesCS2A03G0402700	TraesCS2B03G1177400	0.315968
TraesCS2A03G0402700	TraesCS2B03G1308500	0.301347
TraesCS2A03G0402700	TraesCS2D03G0055600	0.305706
TraesCS2A03G0402700	TraesCS2D03G0668700	0.291038
TraesCS2A03G0402700	TraesCS2D03G0812700	0.301487
TraesCS2A03G0402700	TraesCS3A03G0166500	0.30696
TraesCS2A03G0402700	TraesCS3A03G0674500	0.305233
TraesCS2A03G0402700	TraesCS3A03G0864500	0.3048
TraesCS2A03G0402700	TraesCS3B03G0209700	0.315066
TraesCS2A03G0402700	TraesCS3B03G0987700	0.312283
TraesCS2A03G0402700	TraesCS3D03G0149900	0.31551
TraesCS2A03G0402700	TraesCS4B03G0501400	0.300931
TraesCS2A03G0402700	TraesCS4B03G0822600	0.299339
TraesCS2A03G0402700	TraesCS4D03G0486700	0.310725
TraesCS2A03G0402700	TraesCS5A03G0211900	0.318324
TraesCS2A03G0402700	TraesCS5A03G0357300	0.289025
TraesCS2A03G0402700	TraesCS5A03G0434000	0.306579
TraesCS2A03G0402700	TraesCS5A03G0564700	0.29241
TraesCS2A03G0402700	TraesCS5A03G0564800	0.291077
TraesCS2A03G0402700	TraesCS5A03G0864400	0.320967
TraesCS2A03G0402700	TraesCS5A03G1094100	0.311211
TraesCS2A03G0402700	TraesCS5A03G1126300	0.313993
TraesCS2A03G0402700	TraesCS5B03G0429600	0.323584
TraesCS2A03G0402700	TraesCS5B03G1016400	0.292931
TraesCS2A03G0402700	TraesCS5B03G1138700	0.310402
TraesCS2A03G0402700	TraesCS5B03G1202400	0.324318
TraesCS2A03G0402700	TraesCS5B03G1309400	0.323343
TraesCS2A03G0402700	TraesCS5D03G0038400	0.305109
TraesCS2A03G0402700	TraesCS5D03G0230900	0.312515
TraesCS2A03G0402700	TraesCS5D03G0829100	0.314593
TraesCS2A03G0402700	TraesCS5D03G0913900	0.298275
TraesCS2A03G0402700	TraesCS5D03G1052800	0.29421
TraesCS2A03G0402700	TraesCS5D03G1169700	0.319952
TraesCS2A03G0402700	TraesCS6B03G0350900	0.302345
TraesCS2A03G0402700	TraesCS7A03G0407600	0.291031
TraesCS2A03G0402700	TraesCS7A03G0835900	0.30564
TraesCS2A03G0402700	TraesCS7A03G1041100	0.3132
TraesCS2A03G0402700	TraesCS7A03G1064300	0.289543
TraesCS2A03G0402700	TraesCS7B03G0888400	0.310116
TraesCS2A03G0402700	TraesCS7D03G0069600	0.297033
TraesCS2A03G0402700	TraesCS7D03G0113400	0.300293
TraesCS2A03G0402700	TraesCS7D03G0126800	0.303928
TraesCS2A03G0402700	TraesCS7D03G0500500	0.316619
TraesCS2A03G0402700	TraesCS7D03G0553900	0.294148
TraesCS2A03G0402700	TraesCS7D03G0593300	0.291416
TraesCS2A03G0402700	TraesCS7D03G0732100	0.316349
TraesCS2A03G0402700	TraesCS7D03G0789500	0.291134
TraesCS2A03G0402700	TraesCS7D03G0906100	0.299853
TraesCS2A03G0402700	TraesCS7D03G1177500	0.30235
TraesCS2A03G1241200	TraesCS2A03G1313500	0.323262
TraesCS2A03G1241200	TraesCS2B03G0026900	0.300954
TraesCS2A03G1241200	TraesCS2B03G0082600	0.30657
TraesCS2A03G1241200	TraesCS2B03G0949900	0.291423
TraesCS2A03G1241200	TraesCS2B03G1177400	0.295897
TraesCS2A03G1241200	TraesCS2B03G1218400	0.294398
TraesCS2A03G1241200	TraesCS2B03G1321000	0.298339
TraesCS2A03G1241200	TraesCS2D03G0055600	0.307934
TraesCS2A03G1241200	TraesCS3A03G0674500	0.3024
TraesCS2A03G1241200	TraesCS3B03G0141200	0.306184
TraesCS2A03G1241200	TraesCS3B03G0209700	0.30011
TraesCS2A03G1241200	TraesCS3B03G0987700	0.300708
TraesCS2A03G1241200	TraesCS3D03G0149900	0.30905
TraesCS2A03G1241200	TraesCS3D03G0983400	0.292209
TraesCS2A03G1241200	TraesCS4A03G0180900	0.30021
TraesCS2A03G1241200	TraesCS4B03G0822600	0.302386
TraesCS2A03G1241200	TraesCS4B03G1005300	0.313047
TraesCS2A03G1241200	TraesCS4D03G0115300	0.289461
TraesCS2A03G1241200	TraesCS4D03G0486700	0.295381
TraesCS2A03G1241200	TraesCS5A03G0211900	0.307932
TraesCS2A03G1241200	TraesCS5A03G0357300	0.296131
TraesCS2A03G1241200	TraesCS5A03G0434000	0.3056
TraesCS2A03G1241200	TraesCS5A03G0564700	0.310747
TraesCS2A03G1241200	TraesCS5A03G0564800	0.310884
TraesCS2A03G1241200	TraesCS5A03G0864400	0.302758
TraesCS2A03G1241200	TraesCS5A03G1094100	0.308041
TraesCS2A03G1241200	TraesCS5A03G1126300	0.303875
TraesCS2A03G1241200	TraesCS5B03G0429600	0.309379
TraesCS2A03G1241200	TraesCS5B03G1016400	0.312304
TraesCS2A03G1241200	TraesCS5B03G1138700	0.290473
TraesCS2A03G1241200	TraesCS5B03G1202400	0.312226
TraesCS2A03G1241200	TraesCS5B03G1309400	0.302303
TraesCS2A03G1241200	TraesCS5D03G0230900	0.297079
TraesCS2A03G1241200	TraesCS5D03G0829100	0.304913
TraesCS2A03G1241200	TraesCS5D03G0913900	0.303991
TraesCS2A03G1241200	TraesCS5D03G1052800	0.299405
TraesCS2A03G1241200	TraesCS5D03G1169700	0.292368
TraesCS2A03G1241200	TraesCS7A03G0941200	0.307594
TraesCS2A03G1241200	TraesCS7A03G1041100	0.305985
TraesCS2A03G1241200	TraesCS7A03G1064300	0.303974
TraesCS2A03G1241200	TraesCS7B03G0347800	0.297125
TraesCS2A03G1241200	TraesCS7B03G0471200	0.299804
TraesCS2A03G1241200	TraesCS7B03G0888400	0.290384
TraesCS2A03G1241200	TraesCS7D03G0115600	0.299379
TraesCS2A03G1241200	TraesCS7D03G0126800	0.311298
TraesCS2A03G1241200	TraesCS7D03G0500500	0.307521
TraesCS2A03G1241200	TraesCS7D03G0593300	0.289178
TraesCS2A03G1241200	TraesCS7D03G0732100	0.313196
TraesCS2A03G1241200	TraesCS7D03G0906100	0.307154
TraesCS2A03G1241200	TraesCS7D03G0991300	0.317664
TraesCS2A03G1241200	TraesCS7D03G1177500	0.30505
TraesCS2A03G1313500	TraesCS2B03G0026900	0.329622
TraesCS2A03G1313500	TraesCS2B03G0082600	0.321699
TraesCS2A03G1313500	TraesCS2B03G0480100	0.322113
TraesCS2A03G1313500	TraesCS2B03G0514500	0.302031
TraesCS2A03G1313500	TraesCS2B03G0553100	0.320877
TraesCS2A03G1313500	TraesCS2B03G0949900	0.325791
TraesCS2A03G1313500	TraesCS2B03G1090200	0.31558
TraesCS2A03G1313500	TraesCS2B03G1177400	0.317908
TraesCS2A03G1313500	TraesCS2B03G1218400	0.323077
TraesCS2A03G1313500	TraesCS2B03G1308500	0.313163
TraesCS2A03G1313500	TraesCS2D03G0017900	0.319008
TraesCS2A03G1313500	TraesCS2D03G0055600	0.320313
TraesCS2A03G1313500	TraesCS2D03G0269600	0.299946
TraesCS2A03G1313500	TraesCS2D03G0668700	0.321489
TraesCS2A03G1313500	TraesCS2D03G0812700	0.30781
TraesCS2A03G1313500	TraesCS3A03G0166500	0.317942
TraesCS2A03G1313500	TraesCS3A03G0674500	0.32002
TraesCS2A03G1313500	TraesCS3A03G0864500	0.313056
TraesCS2A03G1313500	TraesCS3B03G0141200	0.324776
TraesCS2A03G1313500	TraesCS3B03G0209700	0.320822
TraesCS2A03G1313500	TraesCS3B03G0987700	0.339627
TraesCS2A03G1313500	TraesCS3D03G0149900	0.34181
TraesCS2A03G1313500	TraesCS3D03G0983400	0.325077
TraesCS2A03G1313500	TraesCS4A03G0180900	0.319729
TraesCS2A03G1313500	TraesCS4B03G0501400	0.313404
TraesCS2A03G1313500	TraesCS4B03G0822600	0.336389
TraesCS2A03G1313500	TraesCS4B03G1005300	0.322622
TraesCS2A03G1313500	TraesCS4D03G0115300	0.318153
TraesCS2A03G1313500	TraesCS4D03G0486700	0.335113
TraesCS2A03G1313500	TraesCS5A03G0211900	0.326056
TraesCS2A03G1313500	TraesCS5A03G0357300	0.320799
TraesCS2A03G1313500	TraesCS5A03G0434000	0.328589
TraesCS2A03G1313500	TraesCS5A03G0564700	0.330473
TraesCS2A03G1313500	TraesCS5A03G0564800	0.326924
TraesCS2A03G1313500	TraesCS5A03G0864400	0.327075
TraesCS2A03G1313500	TraesCS5A03G1094100	0.339275
TraesCS2A03G1313500	TraesCS5A03G1126300	0.336925
TraesCS2A03G1313500	TraesCS5B03G0429600	0.335664
TraesCS2A03G1313500	TraesCS5B03G1016400	0.323041
TraesCS2A03G1313500	TraesCS5B03G1138700	0.324627
TraesCS2A03G1313500	TraesCS5B03G1202400	0.322115
TraesCS2A03G1313500	TraesCS5B03G1309300	0.315003
TraesCS2A03G1313500	TraesCS5B03G1309400	0.331828
TraesCS2A03G1313500	TraesCS5D03G0038400	0.316453
TraesCS2A03G1313500	TraesCS5D03G0230900	0.31448
TraesCS2A03G1313500	TraesCS5D03G0829100	0.325946
TraesCS2A03G1313500	TraesCS5D03G0913900	0.330915
TraesCS2A03G1313500	TraesCS5D03G1052800	0.318924
TraesCS2A03G1313500	TraesCS5D03G1169700	0.323798
TraesCS2A03G1313500	TraesCS6B03G0350900	0.311282
TraesCS2A03G1313500	TraesCS6D03G0785900	0.317947
TraesCS2A03G1313500	TraesCS7A03G0835900	0.316614
TraesCS2A03G1313500	TraesCS7A03G0941200	0.327294
TraesCS2A03G1313500	TraesCS7A03G1041100	0.323373
TraesCS2A03G1313500	TraesCS7A03G1064300	0.333118
TraesCS2A03G1313500	TraesCS7B03G0471200	0.333062
TraesCS2A03G1313500	TraesCS7B03G0888400	0.322162
TraesCS2A03G1313500	TraesCS7D03G0069600	0.307047
TraesCS2A03G1313500	TraesCS7D03G0113400	0.310337
TraesCS2A03G1313500	TraesCS7D03G0115600	0.322775
TraesCS2A03G1313500	TraesCS7D03G0126800	0.336721
TraesCS2A03G1313500	TraesCS7D03G0500500	0.327678
TraesCS2A03G1313500	TraesCS7D03G0553900	0.310999
TraesCS2A03G1313500	TraesCS7D03G0593300	0.320433
TraesCS2A03G1313500	TraesCS7D03G0732100	0.324114
TraesCS2A03G1313500	TraesCS7D03G0789500	0.312248
TraesCS2A03G1313500	TraesCS7D03G0906100	0.324682
TraesCS2A03G1313500	TraesCS7D03G0991300	0.327885
TraesCS2A03G1313500	TraesCS7D03G1177500	0.322456
TraesCS2A03G1313500	TraesCSU03G0053700	0.30801
TraesCS2B03G0026900	TraesCS2B03G0082600	0.294283
TraesCS2B03G0026900	TraesCS2B03G0480100	0.292286
TraesCS2B03G0026900	TraesCS2B03G0553100	0.292266
TraesCS2B03G0026900	TraesCS2B03G0949900	0.326499
TraesCS2B03G0026900	TraesCS2B03G1090200	0.295869
TraesCS2B03G0026900	TraesCS2B03G1177400	0.302192
TraesCS2B03G0026900	TraesCS2B03G1218400	0.297357
TraesCS2B03G0026900	TraesCS2B03G1308500	0.294171
TraesCS2B03G0026900	TraesCS2D03G0017900	0.301847
TraesCS2B03G0026900	TraesCS2D03G0055600	0.300412
TraesCS2B03G0026900	TraesCS2D03G0668700	0.295115
TraesCS2B03G0026900	TraesCS3A03G0166500	0.294563
TraesCS2B03G0026900	TraesCS3A03G0674500	0.312908
TraesCS2B03G0026900	TraesCS3A03G0864500	0.296116
TraesCS2B03G0026900	TraesCS3B03G0141200	0.294235
TraesCS2B03G0026900	TraesCS3B03G0209700	0.3068
TraesCS2B03G0026900	TraesCS3B03G0987700	0.34257
TraesCS2B03G0026900	TraesCS3D03G0149900	0.345473
TraesCS2B03G0026900	TraesCS3D03G0983400	0.305184
TraesCS2B03G0026900	TraesCS4A03G0180900	0.297292
TraesCS2B03G0026900	TraesCS4B03G0501400	0.294842
TraesCS2B03G0026900	TraesCS4B03G0822600	0.335595
TraesCS2B03G0026900	TraesCS4B03G1005300	0.308407
TraesCS2B03G0026900	TraesCS4D03G0486700	0.338845
TraesCS2B03G0026900	TraesCS5A03G0211900	0.317727
TraesCS2B03G0026900	TraesCS5A03G0357300	0.305234
TraesCS2B03G0026900	TraesCS5A03G0434000	0.331535
TraesCS2B03G0026900	TraesCS5A03G0564700	0.321725
TraesCS2B03G0026900	TraesCS5A03G0564800	0.314676
TraesCS2B03G0026900	TraesCS5A03G0864400	0.331825
TraesCS2B03G0026900	TraesCS5A03G1094100	0.346175
TraesCS2B03G0026900	TraesCS5A03G1126300	0.344704
TraesCS2B03G0026900	TraesCS5B03G0429600	0.342977
TraesCS2B03G0026900	TraesCS5B03G1016400	0.29791
TraesCS2B03G0026900	TraesCS5B03G1138700	0.323221
TraesCS2B03G0026900	TraesCS5B03G1202400	0.327129
TraesCS2B03G0026900	TraesCS5B03G1309400	0.339051
TraesCS2B03G0026900	TraesCS5D03G0038400	0.311158
TraesCS2B03G0026900	TraesCS5D03G0230900	0.300322
TraesCS2B03G0026900	TraesCS5D03G0829100	0.314017
TraesCS2B03G0026900	TraesCS5D03G0913900	0.322798
TraesCS2B03G0026900	TraesCS5D03G1052800	0.292965
TraesCS2B03G0026900	TraesCS5D03G1169700	0.320044
TraesCS2B03G0026900	TraesCS6B03G0350900	0.290111
TraesCS2B03G0026900	TraesCS7A03G0835900	0.293501
TraesCS2B03G0026900	TraesCS7A03G0941200	0.311254
TraesCS2B03G0026900	TraesCS7A03G1041100	0.312165
TraesCS2B03G0026900	TraesCS7A03G1064300	0.323578
TraesCS2B03G0026900	TraesCS7B03G0471200	0.310761
TraesCS2B03G0026900	TraesCS7B03G0888400	0.317879
TraesCS2B03G0026900	TraesCS7D03G0113400	0.292752
TraesCS2B03G0026900	TraesCS7D03G0115600	0.294357
TraesCS2B03G0026900	TraesCS7D03G0126800	0.338065
TraesCS2B03G0026900	TraesCS7D03G0500500	0.332535
TraesCS2B03G0026900	TraesCS7D03G0593300	0.302793
TraesCS2B03G0026900	TraesCS7D03G0732100	0.32645
TraesCS2B03G0026900	TraesCS7D03G0906100	0.3064
TraesCS2B03G0026900	TraesCS7D03G0991300	0.309451
TraesCS2B03G0026900	TraesCS7D03G1177500	0.298978
TraesCS2B03G0082600	TraesCS2B03G0480100	0.302822
TraesCS2B03G0082600	TraesCS2B03G0514500	0.294628
TraesCS2B03G0082600	TraesCS2B03G0949900	0.30112
TraesCS2B03G0082600	TraesCS2B03G1090200	0.295281
TraesCS2B03G0082600	TraesCS2B03G1177400	0.303018
TraesCS2B03G0082600	TraesCS2B03G1218400	0.297999
TraesCS2B03G0082600	TraesCS2B03G1321000	0.303605
TraesCS2B03G0082600	TraesCS2D03G0017900	0.290396
TraesCS2B03G0082600	TraesCS2D03G0055600	0.307397
TraesCS2B03G0082600	TraesCS2D03G0269600	0.304709
TraesCS2B03G0082600	TraesCS2D03G0668700	0.293459
TraesCS2B03G0082600	TraesCS3A03G0166500	0.290149
TraesCS2B03G0082600	TraesCS3A03G0674500	0.301733
TraesCS2B03G0082600	TraesCS3B03G0141200	0.303292
TraesCS2B03G0082600	TraesCS3B03G0209700	0.299694
TraesCS2B03G0082600	TraesCS3B03G0987700	0.315706
TraesCS2B03G0082600	TraesCS3D03G0149900	0.321228
TraesCS2B03G0082600	TraesCS3D03G0983400	0.299314
TraesCS2B03G0082600	TraesCS4A03G0180900	0.291763
TraesCS2B03G0082600	TraesCS4B03G0822600	0.308434
TraesCS2B03G0082600	TraesCS4B03G1005300	0.311179
TraesCS2B03G0082600	TraesCS4D03G0115300	0.303947
TraesCS2B03G0082600	TraesCS4D03G0486700	0.308001
TraesCS2B03G0082600	TraesCS5A03G0211900	0.309067
TraesCS2B03G0082600	TraesCS5A03G0357300	0.304037
TraesCS2B03G0082600	TraesCS5A03G0434000	0.305808
TraesCS2B03G0082600	TraesCS5A03G0564700	0.31346
TraesCS2B03G0082600	TraesCS5A03G0564800	0.313886
TraesCS2B03G0082600	TraesCS5A03G0864400	0.310364
TraesCS2B03G0082600	TraesCS5A03G1094100	0.316986
TraesCS2B03G0082600	TraesCS5A03G1126300	0.313459
TraesCS2B03G0082600	TraesCS5B03G0429600	0.317025
TraesCS2B03G0082600	TraesCS5B03G1016400	0.309073
TraesCS2B03G0082600	TraesCS5B03G1138700	0.295645
TraesCS2B03G0082600	TraesCS5B03G1202400	0.314719
TraesCS2B03G0082600	TraesCS5B03G1309300	0.312435
TraesCS2B03G0082600	TraesCS5B03G1309400	0.312523
TraesCS2B03G0082600	TraesCS5D03G0230900	0.294519
TraesCS2B03G0082600	TraesCS5D03G0829100	0.306778
TraesCS2B03G0082600	TraesCS5D03G0913900	0.312615
TraesCS2B03G0082600	TraesCS5D03G1052800	0.298252
TraesCS2B03G0082600	TraesCS5D03G1169700	0.302013
TraesCS2B03G0082600	TraesCS6D03G0785900	0.297659
TraesCS2B03G0082600	TraesCS7A03G0407600	0.289704
TraesCS2B03G0082600	TraesCS7A03G0835900	0.297059
TraesCS2B03G0082600	TraesCS7A03G0941200	0.30757
TraesCS2B03G0082600	TraesCS7A03G1041100	0.303676
TraesCS2B03G0082600	TraesCS7A03G1064300	0.30551
TraesCS2B03G0082600	TraesCS7B03G0347800	0.306454
TraesCS2B03G0082600	TraesCS7B03G0471200	0.294719
TraesCS2B03G0082600	TraesCS7B03G0888400	0.294988
TraesCS2B03G0082600	TraesCS7D03G0069600	0.296713
TraesCS2B03G0082600	TraesCS7D03G0115600	0.30335
TraesCS2B03G0082600	TraesCS7D03G0126800	0.320572
TraesCS2B03G0082600	TraesCS7D03G0500500	0.311999
TraesCS2B03G0082600	TraesCS7D03G0553900	0.294689
TraesCS2B03G0082600	TraesCS7D03G0593300	0.299305
TraesCS2B03G0082600	TraesCS7D03G0732100	0.314085
TraesCS2B03G0082600	TraesCS7D03G0789500	0.291158
TraesCS2B03G0082600	TraesCS7D03G0906100	0.30303
TraesCS2B03G0082600	TraesCS7D03G0960100	0.289984
TraesCS2B03G0082600	TraesCS7D03G0991300	0.307046
TraesCS2B03G0082600	TraesCS7D03G1177500	0.303656
TraesCS2B03G0082600	TraesCSU03G0053700	0.315577
TraesCS2B03G0480100	TraesCS2B03G0949900	0.313879
TraesCS2B03G0480100	TraesCS2B03G1090200	0.300166
TraesCS2B03G0480100	TraesCS2B03G1177400	0.307213
TraesCS2B03G0480100	TraesCS2D03G0055600	0.306411
TraesCS2B03G0480100	TraesCS2D03G0668700	0.292714
TraesCS2B03G0480100	TraesCS3A03G0166500	0.297452
TraesCS2B03G0480100	TraesCS3A03G0674500	0.298896
TraesCS2B03G0480100	TraesCS3B03G0141200	0.301497
TraesCS2B03G0480100	TraesCS3B03G0209700	0.306731
TraesCS2B03G0480100	TraesCS3B03G0987700	0.335674
TraesCS2B03G0480100	TraesCS3D03G0149900	0.337591
TraesCS2B03G0480100	TraesCS3D03G0983400	0.306689
TraesCS2B03G0480100	TraesCS4B03G0822600	0.318339
TraesCS2B03G0480100	TraesCS4B03G1005300	0.307578
TraesCS2B03G0480100	TraesCS4D03G0486700	0.326569
TraesCS2B03G0480100	TraesCS5A03G0211900	0.314425
TraesCS2B03G0480100	TraesCS5A03G0357300	0.292169
TraesCS2B03G0480100	TraesCS5A03G0434000	0.310481
TraesCS2B03G0480100	TraesCS5A03G0564700	0.316957
TraesCS2B03G0480100	TraesCS5A03G0564800	0.316338
TraesCS2B03G0480100	TraesCS5A03G0864400	0.321187
TraesCS2B03G0480100	TraesCS5A03G1094100	0.331203
TraesCS2B03G0480100	TraesCS5A03G1126300	0.328315
TraesCS2B03G0480100	TraesCS5B03G0429600	0.328725
TraesCS2B03G0480100	TraesCS5B03G1016400	0.304543
TraesCS2B03G0480100	TraesCS5B03G1138700	0.304803
TraesCS2B03G0480100	TraesCS5B03G1202400	0.32036
TraesCS2B03G0480100	TraesCS5B03G1309300	0.294141
TraesCS2B03G0480100	TraesCS5B03G1309400	0.327099
TraesCS2B03G0480100	TraesCS5D03G0038400	0.292076
TraesCS2B03G0480100	TraesCS5D03G0230900	0.295803
TraesCS2B03G0480100	TraesCS5D03G0829100	0.312749
TraesCS2B03G0480100	TraesCS5D03G0913900	0.323465
TraesCS2B03G0480100	TraesCS5D03G1052800	0.300859
TraesCS2B03G0480100	TraesCS5D03G1169700	0.315117
TraesCS2B03G0480100	TraesCS6D03G0785900	0.293088
TraesCS2B03G0480100	TraesCS7A03G0835900	0.294084
TraesCS2B03G0480100	TraesCS7A03G0941200	0.307657
TraesCS2B03G0480100	TraesCS7A03G1041100	0.306722
TraesCS2B03G0480100	TraesCS7A03G1064300	0.309383
TraesCS2B03G0480100	TraesCS7B03G0471200	0.30434
TraesCS2B03G0480100	TraesCS7B03G0888400	0.300838
TraesCS2B03G0480100	TraesCS7D03G0115600	0.294815
TraesCS2B03G0480100	TraesCS7D03G0126800	0.332684
TraesCS2B03G0480100	TraesCS7D03G0500500	0.318799
TraesCS2B03G0480100	TraesCS7D03G0732100	0.315015
TraesCS2B03G0480100	TraesCS7D03G0906100	0.299238
TraesCS2B03G0480100	TraesCS7D03G0991300	0.304114
TraesCS2B03G0480100	TraesCS7D03G1177500	0.307832
TraesCS2B03G0480100	TraesCSU03G0053700	0.289241
TraesCS2B03G0514500	TraesCS2B03G0949900	0.306215
TraesCS2B03G0514500	TraesCS2B03G1090200	0.295192
TraesCS2B03G0514500	TraesCS2B03G1177400	0.311279
TraesCS2B03G0514500	TraesCS2B03G1218400	0.28955
TraesCS2B03G0514500	TraesCS2B03G1308500	0.31451
TraesCS2B03G0514500	TraesCS2B03G1321000	0.310309
TraesCS2B03G0514500	TraesCS2D03G0017900	0.298628
TraesCS2B03G0514500	TraesCS2D03G0055600	0.310554
TraesCS2B03G0514500	TraesCS2D03G0269600	0.29002
TraesCS2B03G0514500	TraesCS2D03G0668700	0.294654
TraesCS2B03G0514500	TraesCS2D03G0812700	0.316028
TraesCS2B03G0514500	TraesCS3A03G0166500	0.309449
TraesCS2B03G0514500	TraesCS3A03G0674500	0.308311
TraesCS2B03G0514500	TraesCS3A03G0719100	0.296876
TraesCS2B03G0514500	TraesCS3A03G0864500	0.301474
TraesCS2B03G0514500	TraesCS3B03G0209700	0.318771
TraesCS2B03G0514500	TraesCS4A03G0180900	0.300955
TraesCS2B03G0514500	TraesCS4B03G0501400	0.314132
TraesCS2B03G0514500	TraesCS5A03G0211900	0.314636
TraesCS2B03G0514500	TraesCS5A03G0357300	0.290118
TraesCS2B03G0514500	TraesCS5A03G0434000	0.300062
TraesCS2B03G0514500	TraesCS5A03G0864400	0.309883
TraesCS2B03G0514500	TraesCS5A03G1094100	0.289041
TraesCS2B03G0514500	TraesCS5A03G1126300	0.293611
TraesCS2B03G0514500	TraesCS5B03G0429600	0.307238
TraesCS2B03G0514500	TraesCS5B03G1016400	0.28934
TraesCS2B03G0514500	TraesCS5B03G1138700	0.304824
TraesCS2B03G0514500	TraesCS5B03G1202400	0.316922
TraesCS2B03G0514500	TraesCS5B03G1309400	0.305008
TraesCS2B03G0514500	TraesCS5D03G0038400	0.308227
TraesCS2B03G0514500	TraesCS5D03G0230900	0.32118
TraesCS2B03G0514500	TraesCS5D03G0829100	0.314133
TraesCS2B03G0514500	TraesCS5D03G1052800	0.305907
TraesCS2B03G0514500	TraesCS5D03G1169700	0.30397
TraesCS2B03G0514500	TraesCS5D03G1235900	0.312614
TraesCS2B03G0514500	TraesCS6B03G0350900	0.315531
TraesCS2B03G0514500	TraesCS7A03G0407600	0.319811
TraesCS2B03G0514500	TraesCS7A03G0835900	0.311908
TraesCS2B03G0514500	TraesCS7A03G1041100	0.320809
TraesCS2B03G0514500	TraesCS7B03G0888400	0.308521
TraesCS2B03G0514500	TraesCS7D03G0069600	0.300668
TraesCS2B03G0514500	TraesCS7D03G0113400	0.309436
TraesCS2B03G0514500	TraesCS7D03G0500500	0.309857
TraesCS2B03G0514500	TraesCS7D03G0593300	0.297087
TraesCS2B03G0514500	TraesCS7D03G0732100	0.309252
TraesCS2B03G0514500	TraesCS7D03G0789500	0.296876
TraesCS2B03G0514500	TraesCS7D03G0906100	0.307013
TraesCS2B03G0514500	TraesCS7D03G0960100	0.292287
TraesCS2B03G0514500	TraesCS7D03G1177500	0.305423
TraesCS2B03G0514500	TraesCSU03G0053700	0.289836
TraesCS2B03G0553100	TraesCS2B03G0949900	0.318693
TraesCS2B03G0553100	TraesCS2B03G1090200	0.294808
TraesCS2B03G0553100	TraesCS2B03G1177400	0.30298
TraesCS2B03G0553100	TraesCS2B03G1308500	0.293729
TraesCS2B03G0553100	TraesCS2D03G0055600	0.29842
TraesCS2B03G0553100	TraesCS2D03G0812700	0.294771
TraesCS2B03G0553100	TraesCS3A03G0166500	0.290974
TraesCS2B03G0553100	TraesCS3A03G0674500	0.311937
TraesCS2B03G0553100	TraesCS3A03G0864500	0.30835
TraesCS2B03G0553100	TraesCS3B03G0209700	0.302329
TraesCS2B03G0553100	TraesCS3B03G0987700	0.320002
TraesCS2B03G0553100	TraesCS3D03G0149900	0.324089
TraesCS2B03G0553100	TraesCS3D03G0983400	0.289226
TraesCS2B03G0553100	TraesCS4A03G0180900	0.297297
TraesCS2B03G0553100	TraesCS4B03G0501400	0.294076
TraesCS2B03G0553100	TraesCS4B03G0822600	0.313197
TraesCS2B03G0553100	TraesCS4B03G1005300	0.297004
TraesCS2B03G0553100	TraesCS4D03G0486700	0.315806
TraesCS2B03G0553100	TraesCS5A03G0211900	0.312735
TraesCS2B03G0553100	TraesCS5A03G0434000	0.318429
TraesCS2B03G0553100	TraesCS5A03G0564700	0.302912
TraesCS2B03G0553100	TraesCS5A03G0564800	0.29878
TraesCS2B03G0553100	TraesCS5A03G0864400	0.320504
TraesCS2B03G0553100	TraesCS5A03G1094100	0.323122
TraesCS2B03G0553100	TraesCS5A03G1126300	0.323689
TraesCS2B03G0553100	TraesCS5B03G0429600	0.329503
TraesCS2B03G0553100	TraesCS5B03G1016400	0.296494
TraesCS2B03G0553100	TraesCS5B03G1138700	0.311266
TraesCS2B03G0553100	TraesCS5B03G1202400	0.319777
TraesCS2B03G0553100	TraesCS5B03G1309400	0.324815
TraesCS2B03G0553100	TraesCS5D03G0038400	0.303877
TraesCS2B03G0553100	TraesCS5D03G0230900	0.300885
TraesCS2B03G0553100	TraesCS5D03G0829100	0.306249
TraesCS2B03G0553100	TraesCS5D03G0913900	0.30247
TraesCS2B03G0553100	TraesCS5D03G1169700	0.312916
TraesCS2B03G0553100	TraesCS6B03G0350900	0.290262
TraesCS2B03G0553100	TraesCS7A03G0835900	0.293399
TraesCS2B03G0553100	TraesCS7A03G0941200	0.293868
TraesCS2B03G0553100	TraesCS7A03G1041100	0.307331
TraesCS2B03G0553100	TraesCS7A03G1064300	0.303372
TraesCS2B03G0553100	TraesCS7B03G0471200	0.291464
TraesCS2B03G0553100	TraesCS7B03G0888400	0.310303
TraesCS2B03G0553100	TraesCS7D03G0113400	0.29279
TraesCS2B03G0553100	TraesCS7D03G0126800	0.315658
TraesCS2B03G0553100	TraesCS7D03G0500500	0.319211
TraesCS2B03G0553100	TraesCS7D03G0593300	0.290453
TraesCS2B03G0553100	TraesCS7D03G0732100	0.32721
TraesCS2B03G0553100	TraesCS7D03G0906100	0.302234
TraesCS2B03G0553100	TraesCS7D03G0991300	0.298095
TraesCS2B03G0553100	TraesCS7D03G1177500	0.29499
TraesCS2B03G0949900	TraesCS2B03G1090200	0.328366
TraesCS2B03G0949900	TraesCS2B03G1177400	0.328112
TraesCS2B03G0949900	TraesCS2B03G1218400	0.308398
TraesCS2B03G0949900	TraesCS2B03G1308500	0.335124
TraesCS2B03G0949900	TraesCS2D03G0017900	0.320955
TraesCS2B03G0949900	TraesCS2D03G0055600	0.31401
TraesCS2B03G0949900	TraesCS2D03G0668700	0.327933
TraesCS2B03G0949900	TraesCS2D03G0812700	0.325989
TraesCS2B03G0949900	TraesCS3A03G0166500	0.328935
TraesCS2B03G0949900	TraesCS3A03G0674500	0.3269
TraesCS2B03G0949900	TraesCS3A03G0864500	0.331207
TraesCS2B03G0949900	TraesCS3B03G0141200	0.299566
TraesCS2B03G0949900	TraesCS3B03G0209700	0.330698
TraesCS2B03G0949900	TraesCS3B03G0987700	0.341425
TraesCS2B03G0949900	TraesCS3D03G0149900	0.3403
TraesCS2B03G0949900	TraesCS3D03G0983400	0.309167
TraesCS2B03G0949900	TraesCS4A03G0180900	0.322368
TraesCS2B03G0949900	TraesCS4B03G0501400	0.337596
TraesCS2B03G0949900	TraesCS4B03G0822600	0.326371
TraesCS2B03G0949900	TraesCS4B03G1005300	0.301869
TraesCS2B03G0949900	TraesCS4D03G0115300	0.289838
TraesCS2B03G0949900	TraesCS4D03G0486700	0.338239
TraesCS2B03G0949900	TraesCS5A03G0211900	0.334614
TraesCS2B03G0949900	TraesCS5A03G0357300	0.316196
TraesCS2B03G0949900	TraesCS5A03G0434000	0.332452
TraesCS2B03G0949900	TraesCS5A03G0564700	0.309238
TraesCS2B03G0949900	TraesCS5A03G0564800	0.304213
TraesCS2B03G0949900	TraesCS5A03G0864400	0.341372
TraesCS2B03G0949900	TraesCS5A03G1094100	0.339144
TraesCS2B03G0949900	TraesCS5A03G1126300	0.34283
TraesCS2B03G0949900	TraesCS5B03G0429600	0.345386
TraesCS2B03G0949900	TraesCS5B03G1016400	0.303551
TraesCS2B03G0949900	TraesCS5B03G1138700	0.341024
TraesCS2B03G0949900	TraesCS5B03G1202400	0.339312
TraesCS2B03G0949900	TraesCS5B03G1309300	0.292309
TraesCS2B03G0949900	TraesCS5B03G1309400	0.343864
TraesCS2B03G0949900	TraesCS5D03G0038400	0.340736
TraesCS2B03G0949900	TraesCS5D03G0230900	0.329301
TraesCS2B03G0949900	TraesCS5D03G0829100	0.331672
TraesCS2B03G0949900	TraesCS5D03G0913900	0.314458
TraesCS2B03G0949900	TraesCS5D03G1052800	0.308101
TraesCS2B03G0949900	TraesCS5D03G1169700	0.335304
TraesCS2B03G0949900	TraesCS6B03G0350900	0.335196
TraesCS2B03G0949900	TraesCS6D03G0785900	0.306225
TraesCS2B03G0949900	TraesCS7A03G0835900	0.320582
TraesCS2B03G0949900	TraesCS7A03G0941200	0.301893
TraesCS2B03G0949900	TraesCS7A03G1041100	0.330829
TraesCS2B03G0949900	TraesCS7A03G1064300	0.316498
TraesCS2B03G0949900	TraesCS7B03G0471200	0.323506
TraesCS2B03G0949900	TraesCS7B03G0888400	0.338617
TraesCS2B03G0949900	TraesCS7D03G0069600	0.307945
TraesCS2B03G0949900	TraesCS7D03G0113400	0.340956
TraesCS2B03G0949900	TraesCS7D03G0115600	0.297721
TraesCS2B03G0949900	TraesCS7D03G0126800	0.322397
TraesCS2B03G0949900	TraesCS7D03G0500500	0.336394
TraesCS2B03G0949900	TraesCS7D03G0553900	0.32136
TraesCS2B03G0949900	TraesCS7D03G0593300	0.31617
TraesCS2B03G0949900	TraesCS7D03G0732100	0.333596
TraesCS2B03G0949900	TraesCS7D03G0789500	0.317234
TraesCS2B03G0949900	TraesCS7D03G0906100	0.322688
TraesCS2B03G0949900	TraesCS7D03G0991300	0.307159
TraesCS2B03G0949900	TraesCS7D03G1177500	0.312973
TraesCS2B03G1090200	TraesCS2B03G1177400	0.315039
TraesCS2B03G1090200	TraesCS2B03G1308500	0.29653
TraesCS2B03G1090200	TraesCS2D03G0017900	0.294061
TraesCS2B03G1090200	TraesCS2D03G0055600	0.306038
TraesCS2B03G1090200	TraesCS2D03G0668700	0.305295
TraesCS2B03G1090200	TraesCS2D03G0812700	0.293803
TraesCS2B03G1090200	TraesCS3A03G0166500	0.310746
TraesCS2B03G1090200	TraesCS3A03G0674500	0.300706
TraesCS2B03G1090200	TraesCS3A03G0864500	0.301963
TraesCS2B03G1090200	TraesCS3B03G0141200	0.29207
TraesCS2B03G1090200	TraesCS3B03G0209700	0.318122
TraesCS2B03G1090200	TraesCS3B03G0987700	0.337907
TraesCS2B03G1090200	TraesCS3D03G0149900	0.337346
TraesCS2B03G1090200	TraesCS3D03G0983400	0.297946
TraesCS2B03G1090200	TraesCS4B03G0501400	0.298622
TraesCS2B03G1090200	TraesCS4B03G0822600	0.31503
TraesCS2B03G1090200	TraesCS4B03G1005300	0.289065
TraesCS2B03G1090200	TraesCS4D03G0486700	0.329989
TraesCS2B03G1090200	TraesCS5A03G0211900	0.3242
TraesCS2B03G1090200	TraesCS5A03G0357300	0.290215
TraesCS2B03G1090200	TraesCS5A03G0434000	0.312749
TraesCS2B03G1090200	TraesCS5A03G0564700	0.301148
TraesCS2B03G1090200	TraesCS5A03G0564800	0.298327
TraesCS2B03G1090200	TraesCS5A03G0864400	0.326715
TraesCS2B03G1090200	TraesCS5A03G1094100	0.331262
TraesCS2B03G1090200	TraesCS5A03G1126300	0.332308
TraesCS2B03G1090200	TraesCS5B03G0429600	0.335675
TraesCS2B03G1090200	TraesCS5B03G1016400	0.298252
TraesCS2B03G1090200	TraesCS5B03G1138700	0.313799
TraesCS2B03G1090200	TraesCS5B03G1202400	0.32648
TraesCS2B03G1090200	TraesCS5B03G1309300	0.295407
TraesCS2B03G1090200	TraesCS5B03G1309400	0.336122
TraesCS2B03G1090200	TraesCS5D03G0038400	0.301554
TraesCS2B03G1090200	TraesCS5D03G0230900	0.309857
TraesCS2B03G1090200	TraesCS5D03G0829100	0.319244
TraesCS2B03G1090200	TraesCS5D03G0913900	0.310874
TraesCS2B03G1090200	TraesCS5D03G1052800	0.297099
TraesCS2B03G1090200	TraesCS5D03G1169700	0.326141
TraesCS2B03G1090200	TraesCS6B03G0350900	0.298242
TraesCS2B03G1090200	TraesCS6D03G0785900	0.30289
TraesCS2B03G1090200	TraesCS7A03G0835900	0.30414
TraesCS2B03G1090200	TraesCS7A03G1041100	0.314929
TraesCS2B03G1090200	TraesCS7A03G1064300	0.29892
TraesCS2B03G1090200	TraesCS7B03G0471200	0.306979
TraesCS2B03G1090200	TraesCS7B03G0888400	0.309742
TraesCS2B03G1090200	TraesCS7D03G0069600	0.298929
TraesCS2B03G1090200	TraesCS7D03G0113400	0.297715
TraesCS2B03G1090200	TraesCS7D03G0126800	0.323864
TraesCS2B03G1090200	TraesCS7D03G0500500	0.32031
TraesCS2B03G1090200	TraesCS7D03G0553900	0.305706
TraesCS2B03G1090200	TraesCS7D03G0593300	0.29815
TraesCS2B03G1090200	TraesCS7D03G0732100	0.318988
TraesCS2B03G1090200	TraesCS7D03G0789500	0.30609
TraesCS2B03G1090200	TraesCS7D03G0906100	0.30012
TraesCS2B03G1090200	TraesCS7D03G0991300	0.296955
TraesCS2B03G1090200	TraesCS7D03G1177500	0.307602
TraesCS2B03G1177400	TraesCS2B03G1218400	0.30099
TraesCS2B03G1177400	TraesCS2B03G1308500	0.308573
TraesCS2B03G1177400	TraesCS2D03G0017900	0.307885
TraesCS2B03G1177400	TraesCS2D03G0055600	0.308225
TraesCS2B03G1177400	TraesCS2D03G0269600	0.294254
TraesCS2B03G1177400	TraesCS2D03G0668700	0.31609
TraesCS2B03G1177400	TraesCS2D03G0812700	0.305083
TraesCS2B03G1177400	TraesCS3A03G0166500	0.31621
TraesCS2B03G1177400	TraesCS3A03G0674500	0.308906
TraesCS2B03G1177400	TraesCS3A03G0864500	0.311642
TraesCS2B03G1177400	TraesCS3B03G0141200	0.298311
TraesCS2B03G1177400	TraesCS3B03G0209700	0.31733
TraesCS2B03G1177400	TraesCS3B03G0987700	0.333083
TraesCS2B03G1177400	TraesCS3D03G0149900	0.33451
TraesCS2B03G1177400	TraesCS3D03G0983400	0.302594
TraesCS2B03G1177400	TraesCS4A03G0180900	0.300345
TraesCS2B03G1177400	TraesCS4B03G0501400	0.310012
TraesCS2B03G1177400	TraesCS4B03G0822600	0.317406
TraesCS2B03G1177400	TraesCS4B03G1005300	0.297681
TraesCS2B03G1177400	TraesCS4D03G0115300	0.29309
TraesCS2B03G1177400	TraesCS4D03G0486700	0.328263
TraesCS2B03G1177400	TraesCS5A03G0211900	0.321377
TraesCS2B03G1177400	TraesCS5A03G0357300	0.307018
TraesCS2B03G1177400	TraesCS5A03G0434000	0.317184
TraesCS2B03G1177400	TraesCS5A03G0564700	0.304953
TraesCS2B03G1177400	TraesCS5A03G0564800	0.301526
TraesCS2B03G1177400	TraesCS5A03G0864400	0.32848
TraesCS2B03G1177400	TraesCS5A03G1094100	0.330485
TraesCS2B03G1177400	TraesCS5A03G1126300	0.331847
TraesCS2B03G1177400	TraesCS5B03G0429600	0.335923
TraesCS2B03G1177400	TraesCS5B03G1016400	0.298964
TraesCS2B03G1177400	TraesCS5B03G1138700	0.31741
TraesCS2B03G1177400	TraesCS5B03G1202400	0.325244
TraesCS2B03G1177400	TraesCS5B03G1309300	0.30949
TraesCS2B03G1177400	TraesCS5B03G1309400	0.33507
TraesCS2B03G1177400	TraesCS5D03G0038400	0.311197
TraesCS2B03G1177400	TraesCS5D03G0230900	0.311049
TraesCS2B03G1177400	TraesCS5D03G0829100	0.318277
TraesCS2B03G1177400	TraesCS5D03G0913900	0.311173
TraesCS2B03G1177400	TraesCS5D03G1052800	0.307631
TraesCS2B03G1177400	TraesCS5D03G1169700	0.324243
TraesCS2B03G1177400	TraesCS6B03G0350900	0.310622
TraesCS2B03G1177400	TraesCS6D03G0785900	0.307817
TraesCS2B03G1177400	TraesCS7A03G0835900	0.316642
TraesCS2B03G1177400	TraesCS7A03G0941200	0.298591
TraesCS2B03G1177400	TraesCS7A03G1041100	0.317113
TraesCS2B03G1177400	TraesCS7A03G1064300	0.307111
TraesCS2B03G1177400	TraesCS7B03G0471200	0.31012
TraesCS2B03G1177400	TraesCS7B03G0888400	0.316092
TraesCS2B03G1177400	TraesCS7D03G0069600	0.312366
TraesCS2B03G1177400	TraesCS7D03G0113400	0.308667
TraesCS2B03G1177400	TraesCS7D03G0115600	0.301011
TraesCS2B03G1177400	TraesCS7D03G0126800	0.322772
TraesCS2B03G1177400	TraesCS7D03G0500500	0.32454
TraesCS2B03G1177400	TraesCS7D03G0553900	0.311138
TraesCS2B03G1177400	TraesCS7D03G0593300	0.310282
TraesCS2B03G1177400	TraesCS7D03G0732100	0.322787
TraesCS2B03G1177400	TraesCS7D03G0789500	0.314512
TraesCS2B03G1177400	TraesCS7D03G0906100	0.305549
TraesCS2B03G1177400	TraesCS7D03G0991300	0.297754
TraesCS2B03G1177400	TraesCS7D03G1177500	0.309516
TraesCS2B03G1177400	TraesCSU03G0053700	0.30278
TraesCS2B03G1218400	TraesCS2B03G1308500	0.296739
TraesCS2B03G1218400	TraesCS2D03G0017900	0.292802
TraesCS2B03G1218400	TraesCS2D03G0055600	0.306378
TraesCS2B03G1218400	TraesCS2D03G0269600	0.298057
TraesCS2B03G1218400	TraesCS2D03G0812700	0.292744
TraesCS2B03G1218400	TraesCS3A03G0674500	0.313978
TraesCS2B03G1218400	TraesCS3A03G0864500	0.289382
TraesCS2B03G1218400	TraesCS3B03G0141200	0.29127
TraesCS2B03G1218400	TraesCS3B03G0209700	0.301781
TraesCS2B03G1218400	TraesCS3B03G0987700	0.313856
TraesCS2B03G1218400	TraesCS3D03G0149900	0.32091
TraesCS2B03G1218400	TraesCS4A03G0180900	0.302604
TraesCS2B03G1218400	TraesCS4B03G0501400	0.292509
TraesCS2B03G1218400	TraesCS4B03G0822600	0.318985
TraesCS2B03G1218400	TraesCS4B03G1005300	0.30911
TraesCS2B03G1218400	TraesCS4D03G0486700	0.315174
TraesCS2B03G1218400	TraesCS5A03G0211900	0.312466
TraesCS2B03G1218400	TraesCS5A03G0357300	0.300951
TraesCS2B03G1218400	TraesCS5A03G0434000	0.319898
TraesCS2B03G1218400	TraesCS5A03G0564700	0.314927
TraesCS2B03G1218400	TraesCS5A03G0564800	0.309254
TraesCS2B03G1218400	TraesCS5A03G0864400	0.318823
TraesCS2B03G1218400	TraesCS5A03G1094100	0.323063
TraesCS2B03G1218400	TraesCS5A03G1126300	0.322062
TraesCS2B03G1218400	TraesCS5B03G0429600	0.324153
TraesCS2B03G1218400	TraesCS5B03G1016400	0.301816
TraesCS2B03G1218400	TraesCS5B03G1138700	0.311063
TraesCS2B03G1218400	TraesCS5B03G1202400	0.317743
TraesCS2B03G1218400	TraesCS5B03G1309300	0.29588
TraesCS2B03G1218400	TraesCS5B03G1309400	0.318387
TraesCS2B03G1218400	TraesCS5D03G0038400	0.305382
TraesCS2B03G1218400	TraesCS5D03G0230900	0.300091
TraesCS2B03G1218400	TraesCS5D03G0829100	0.311469
TraesCS2B03G1218400	TraesCS5D03G0913900	0.310099
TraesCS2B03G1218400	TraesCS5D03G1052800	0.301637
TraesCS2B03G1218400	TraesCS5D03G1169700	0.302563
TraesCS2B03G1218400	TraesCS6B03G0350900	0.291458
TraesCS2B03G1218400	TraesCS7A03G0835900	0.299845
TraesCS2B03G1218400	TraesCS7A03G0941200	0.307486
TraesCS2B03G1218400	TraesCS7A03G1041100	0.312115
TraesCS2B03G1218400	TraesCS7A03G1064300	0.315145
TraesCS2B03G1218400	TraesCS7B03G0471200	0.291237
TraesCS2B03G1218400	TraesCS7B03G0888400	0.310619
TraesCS2B03G1218400	TraesCS7D03G0113400	0.289874
TraesCS2B03G1218400	TraesCS7D03G0115600	0.301813
TraesCS2B03G1218400	TraesCS7D03G0126800	0.318378
TraesCS2B03G1218400	TraesCS7D03G0500500	0.323417
TraesCS2B03G1218400	TraesCS7D03G0593300	0.296581
TraesCS2B03G1218400	TraesCS7D03G0732100	0.31904
TraesCS2B03G1218400	TraesCS7D03G0906100	0.313537
TraesCS2B03G1218400	TraesCS7D03G0991300	0.30638
TraesCS2B03G1218400	TraesCS7D03G1177500	0.299701
TraesCS2B03G1218400	TraesCSU03G0053700	0.297634
TraesCS2B03G1308500	TraesCS2D03G0017900	0.31306
TraesCS2B03G1308500	TraesCS2D03G0055600	0.301292
TraesCS2B03G1308500	TraesCS2D03G0269600	0.294154
TraesCS2B03G1308500	TraesCS2D03G0668700	0.304341
TraesCS2B03G1308500	TraesCS2D03G0812700	0.311906
TraesCS2B03G1308500	TraesCS3A03G0166500	0.30498
TraesCS2B03G1308500	TraesCS3A03G0674500	0.323665
TraesCS2B03G1308500	TraesCS3A03G0864500	0.315634
TraesCS2B03G1308500	TraesCS3B03G0209700	0.317161
TraesCS2B03G1308500	TraesCS3B03G0987700	0.317657
TraesCS2B03G1308500	TraesCS3D03G0149900	0.321915
TraesCS2B03G1308500	TraesCS4A03G0180900	0.305864
TraesCS2B03G1308500	TraesCS4B03G0501400	0.320814
TraesCS2B03G1308500	TraesCS4B03G0822600	0.319049
TraesCS2B03G1308500	TraesCS4D03G0486700	0.324813
TraesCS2B03G1308500	TraesCS5A03G0211900	0.318385
TraesCS2B03G1308500	TraesCS5A03G0357300	0.304571
TraesCS2B03G1308500	TraesCS5A03G0434000	0.329322
TraesCS2B03G1308500	TraesCS5A03G0564700	0.295307
TraesCS2B03G1308500	TraesCS5A03G0864400	0.33314
TraesCS2B03G1308500	TraesCS5A03G1094100	0.326291
TraesCS2B03G1308500	TraesCS5A03G1126300	0.332203
TraesCS2B03G1308500	TraesCS5B03G0429600	0.338462
TraesCS2B03G1308500	TraesCS5B03G1138700	0.333812
TraesCS2B03G1308500	TraesCS5B03G1202400	0.32707
TraesCS2B03G1308500	TraesCS5B03G1309300	0.291918
TraesCS2B03G1308500	TraesCS5B03G1309400	0.336062
TraesCS2B03G1308500	TraesCS5D03G0038400	0.328085
TraesCS2B03G1308500	TraesCS5D03G0230900	0.318522
TraesCS2B03G1308500	TraesCS5D03G0829100	0.315517
TraesCS2B03G1308500	TraesCS5D03G0913900	0.294857
TraesCS2B03G1308500	TraesCS5D03G1052800	0.29768
TraesCS2B03G1308500	TraesCS5D03G1169700	0.322058
TraesCS2B03G1308500	TraesCS6B03G0350900	0.318796
TraesCS2B03G1308500	TraesCS7A03G0407600	0.291366
TraesCS2B03G1308500	TraesCS7A03G0835900	0.314866
TraesCS2B03G1308500	TraesCS7A03G1041100	0.322925
TraesCS2B03G1308500	TraesCS7A03G1064300	0.30481
TraesCS2B03G1308500	TraesCS7B03G0471200	0.289004
TraesCS2B03G1308500	TraesCS7B03G0888400	0.333873
TraesCS2B03G1308500	TraesCS7D03G0069600	0.305747
TraesCS2B03G1308500	TraesCS7D03G0113400	0.324047
TraesCS2B03G1308500	TraesCS7D03G0126800	0.306728
TraesCS2B03G1308500	TraesCS7D03G0500500	0.33336
TraesCS2B03G1308500	TraesCS7D03G0593300	0.313011
TraesCS2B03G1308500	TraesCS7D03G0732100	0.326494
TraesCS2B03G1308500	TraesCS7D03G0789500	0.297165
TraesCS2B03G1308500	TraesCS7D03G0906100	0.308995
TraesCS2B03G1308500	TraesCS7D03G1177500	0.296652
TraesCS2B03G1321000	TraesCS2D03G0055600	0.29855
TraesCS2B03G1321000	TraesCS2D03G0269600	0.325555
TraesCS2B03G1321000	TraesCS3A03G0166500	0.290975
TraesCS2B03G1321000	TraesCS3A03G0719100	0.312352
TraesCS2B03G1321000	TraesCS3B03G0209700	0.295471
TraesCS2B03G1321000	TraesCS5B03G1016400	0.290414
TraesCS2B03G1321000	TraesCS5B03G1309300	0.314146
TraesCS2B03G1321000	TraesCS5D03G0230900	0.291669
TraesCS2B03G1321000	TraesCS5D03G1052800	0.305357
TraesCS2B03G1321000	TraesCS5D03G1235900	0.306023
TraesCS2B03G1321000	TraesCS7A03G0407600	0.305169
TraesCS2B03G1321000	TraesCS7A03G0835900	0.313807
TraesCS2B03G1321000	TraesCS7A03G1041100	0.295972
TraesCS2B03G1321000	TraesCS7D03G0069600	0.310281
TraesCS2B03G1321000	TraesCS7D03G0115600	0.304751
TraesCS2B03G1321000	TraesCS7D03G0593300	0.306472
TraesCS2B03G1321000	TraesCS7D03G0789500	0.292388
TraesCS2B03G1321000	TraesCS7D03G1177500	0.303443
TraesCS2B03G1321000	TraesCSU03G0053700	0.317764
TraesCS2D03G0017900	TraesCS2D03G0055600	0.307346
TraesCS2D03G0017900	TraesCS2D03G0269600	0.293678
TraesCS2D03G0017900	TraesCS2D03G0668700	0.290804
TraesCS2D03G0017900	TraesCS2D03G0812700	0.306484
TraesCS2D03G0017900	TraesCS3A03G0166500	0.299322
TraesCS2D03G0017900	TraesCS3A03G0674500	0.319191
TraesCS2D03G0017900	TraesCS3A03G0864500	0.301504
TraesCS2D03G0017900	TraesCS3B03G0209700	0.312907
TraesCS2D03G0017900	TraesCS3B03G0987700	0.311885
TraesCS2D03G0017900	TraesCS3D03G0149900	0.318457
TraesCS2D03G0017900	TraesCS4A03G0180900	0.307714
TraesCS2D03G0017900	TraesCS4B03G0501400	0.310284
TraesCS2D03G0017900	TraesCS4B03G0822600	0.316205
TraesCS2D03G0017900	TraesCS4B03G1005300	0.298237
TraesCS2D03G0017900	TraesCS4D03G0486700	0.316658
TraesCS2D03G0017900	TraesCS5A03G0211900	0.319157
TraesCS2D03G0017900	TraesCS5A03G0357300	0.305445
TraesCS2D03G0017900	TraesCS5A03G0434000	0.323992
TraesCS2D03G0017900	TraesCS5A03G0564700	0.304534
TraesCS2D03G0017900	TraesCS5A03G0564800	0.297564
TraesCS2D03G0017900	TraesCS5A03G0864400	0.325464
TraesCS2D03G0017900	TraesCS5A03G1094100	0.321861
TraesCS2D03G0017900	TraesCS5A03G1126300	0.324161
TraesCS2D03G0017900	TraesCS5B03G0429600	0.329946
TraesCS2D03G0017900	TraesCS5B03G1016400	0.293816
TraesCS2D03G0017900	TraesCS5B03G1138700	0.322395
TraesCS2D03G0017900	TraesCS5B03G1202400	0.326306
TraesCS2D03G0017900	TraesCS5B03G1309300	0.291041
TraesCS2D03G0017900	TraesCS5B03G1309400	0.326075
TraesCS2D03G0017900	TraesCS5D03G0038400	0.319358
TraesCS2D03G0017900	TraesCS5D03G0230900	0.314898
TraesCS2D03G0017900	TraesCS5D03G0829100	0.317257
TraesCS2D03G0017900	TraesCS5D03G0913900	0.301305
TraesCS2D03G0017900	TraesCS5D03G1052800	0.297335
TraesCS2D03G0017900	TraesCS5D03G1169700	0.313473
TraesCS2D03G0017900	TraesCS6B03G0350900	0.308856
TraesCS2D03G0017900	TraesCS7A03G0407600	0.293166
TraesCS2D03G0017900	TraesCS7A03G0835900	0.307777
TraesCS2D03G0017900	TraesCS7A03G0941200	0.294577
TraesCS2D03G0017900	TraesCS7A03G1041100	0.319909
TraesCS2D03G0017900	TraesCS7A03G1064300	0.308689
TraesCS2D03G0017900	TraesCS7B03G0471200	0.290354
TraesCS2D03G0017900	TraesCS7B03G0888400	0.322388
TraesCS2D03G0017900	TraesCS7D03G0069600	0.292767
TraesCS2D03G0017900	TraesCS7D03G0113400	0.307391
TraesCS2D03G0017900	TraesCS7D03G0115600	0.290543
TraesCS2D03G0017900	TraesCS7D03G0126800	0.30991
TraesCS2D03G0017900	TraesCS7D03G0500500	0.328876
TraesCS2D03G0017900	TraesCS7D03G0593300	0.305237
TraesCS2D03G0017900	TraesCS7D03G0732100	0.321472
TraesCS2D03G0017900	TraesCS7D03G0906100	0.313953
TraesCS2D03G0017900	TraesCS7D03G0991300	0.299888
TraesCS2D03G0017900	TraesCS7D03G1177500	0.29868
[truncated: 1,584 more rows]

## Sheet: PG(34_3)_GO
Gene Count:	76
Background Gene Count:	75477
Ontology:	E:\GOAnalyzer\Deployment\Data\gofiles\go-basic.obo
Annotation:	E:\GOAnalyzer\Deployment\data\gofiles\Gene-GO_association.wheat2022
Hierarchy:	All
Correction:	BH FDR p-value adjustment
Max Path Length From Leaf:	N/A
Min Path Length From Root:	3
GO ID	Description	P-Value	Corrected P-Value	Total Genes	Matched Gene Counts	Matched Genes
GO:0000305	response to oxygen radical	0.0001692	0.0001839	19	2 (10.53%)	TraesCS2A03G1241200;TraesCS7B03G0347800	0
GO:0000303	response to superoxide	0.0001692	0.0001839	19	2 (10.53%)	TraesCS2A03G1241200;TraesCS7B03G0347800	0
GO:0034614	cellular response to reactive oxygen species	0.0001692	0.0001839	19	2 (10.53%)	TraesCS2A03G1241200;TraesCS7B03G0347800	0
GO:0071450	cellular response to oxygen radical	0.0001692	0.0001839	19	2 (10.53%)	TraesCS2A03G1241200;TraesCS7B03G0347800	0
GO:0071451	cellular response to superoxide	0.0001692	0.0001839	19	2 (10.53%)	TraesCS2A03G1241200;TraesCS7B03G0347800	0
GO:0019430	removal of superoxide radicals	0.0001692	0.0001839	19	2 (10.53%)	TraesCS2A03G1241200;TraesCS7B03G0347800	0
GO:0006869	lipid transport	0.0002232	0.0002426	291	4 (1.37%)	TraesCS3B03G0141200;TraesCSU03G0053700;TraesCS1D03G0886300;TraesCS1D03G0886200	1
GO:0010876	lipid localization	0.0002506	0.0002723	300	4 (1.33%)	TraesCS3B03G0141200;TraesCSU03G0053700;TraesCS1D03G0886300;TraesCS1D03G0886200	1
GO:0006801	superoxide metabolic process	0.0003718	0.0004039	28	2 (7.14%)	TraesCS2A03G1241200;TraesCS7B03G0347800	0
GO:0009528	plastid inner membrane	0.0004274	0.0004641	30	2 (6.67%)	TraesCS1B03G0717300;TraesCS1A03G0628300	1
GO:0009706	chloroplast inner membrane	0.0004274	0.0004641	30	2 (6.67%)	TraesCS1B03G0717300;TraesCS1A03G0628300	1
GO:0098869	cellular oxidant detoxification	0.0004585	0.0004978	147	3 (2.04%)	TraesCS2A03G1241200;TraesCS7A03G0835900;TraesCS7B03G0347800	0
GO:0098754	detoxification	0.0005553	0.0006028	157	3 (1.91%)	TraesCS2A03G1241200;TraesCS7A03G0835900;TraesCS7B03G0347800	0
GO:0097237	cellular response to toxic substance	0.0005553	0.0006028	157	3 (1.91%)	TraesCS2A03G1241200;TraesCS7A03G0835900;TraesCS7B03G0347800	0
GO:1990748	cellular detoxification	0.0005553	0.0006028	157	3 (1.91%)	TraesCS2A03G1241200;TraesCS7A03G0835900;TraesCS7B03G0347800	0
GO:0003755	peptidyl-prolyl cis-trans isomerase activity	0.0006082	0.0006601	162	3 (1.85%)	TraesCS2A03G0017800;TraesCS2B03G0026900;TraesCS2D03G0017900	0
GO:0009636	response to toxic substance	0.0006642	0.0007207	167	3 (1.8%)	TraesCS2A03G1241200;TraesCS7A03G0835900;TraesCS7B03G0347800	0
GO:0016859	cis-trans isomerase activity	0.0006875	0.0007458	169	3 (1.78%)	TraesCS2A03G0017800;TraesCS2B03G0026900;TraesCS2D03G0017900	0
GO:0034599	cellular response to oxidative stress	0.0007237	0.0007849	39	2 (5.13%)	TraesCS2A03G1241200;TraesCS7B03G0347800	0
GO:0062197	cellular response to chemical stress	0.00105	0.001139	47	2 (4.26%)	TraesCS2A03G1241200;TraesCS7B03G0347800	0
GO:0010035	response to inorganic substance	0.001918	0.002079	519	4 (0.77%)	TraesCS2A03G1241200;TraesCS2A03G1313500;TraesCS4A03G0180900;TraesCS7B03G0347800	0
GO:0033609	oxalate metabolic process	0.003018	0.003271	3	1 (33.33%)	TraesCS2A03G1313500	1
GO:0033611	oxalate catabolic process	0.003018	0.003271	3	1 (33.33%)	TraesCS2A03G1313500	1
GO:0050203	oxalate-CoA ligase activity	0.003018	0.003271	3	1 (33.33%)	TraesCS2A03G1313500	1
GO:0031969	chloroplast membrane	0.00323	0.0035	83	2 (2.41%)	TraesCS1B03G0717300;TraesCS1A03G0628300	1
GO:0016020	membrane	0.003452	0.003739	17900	29 (0.16%)	TraesCS7D03G0500500;TraesCS1A03G0405200;TraesCS5A03G0864400;TraesCS1A03G0986400;TraesCS2B03G0026900;TraesCS1B03G0717300;TraesCS7A03G1041100;TraesCS1A03G0781500;TraesCS5B03G1309300;TraesCS2D03G0055600;TraesCS5D03G0913900;TraesCS7D03G0553900;TraesCS5D03G1169700;TraesCS5D03G0038400;TraesCS4D03G0486700;TraesCS1A03G0273200;TraesCS3B03G0209700;TraesCS2B03G0082600;TraesCS1A03G0628300;TraesCS3B03G0141200…	1
GO:0000302	response to reactive oxygen species	0.003462	0.00375	86	2 (2.33%)	TraesCS2A03G1241200;TraesCS7B03G0347800	0
GO:0005737	cytoplasm	0.004094	0.004433	8490	17 (0.2%)	TraesCS7D03G0553900;TraesCS4B03G0501400;TraesCS6D03G0785900;TraesCS3B03G0987700;TraesCS1A03G0628300;TraesCS2D03G0017900;TraesCS2D03G0668700;TraesCS2B03G0514500;TraesCS7D03G0069600;TraesCS2B03G0026900;TraesCS2A03G1241200;TraesCS1A03G0809500;TraesCS1B03G0717300;TraesCS7A03G1041100;TraesCS2A03G1313500;TraesCS5B03G1309300;TraesCS7B03G0347800	0
GO:0004349	glutamate 5-kinase activity	0.006027	0.006524	6	1 (16.67%)	TraesCS3B03G0987700	0
GO:0004350	glutamate-5-semialdehyde dehydrogenase activity	0.006027	0.006524	6	1 (16.67%)	TraesCS3B03G0987700	0
GO:0010030	positive regulation of seed germination	0.008027	0.008688	8	1 (12.5%)	TraesCS2A03G1313500	1
GO:0015112	nitrate transmembrane transporter activity	0.008027	0.008688	8	1 (12.5%)	TraesCS7A03G1041100	1
GO:0042221	response to chemical	0.00811	0.008775	1733	6 (0.35%)	TraesCS7D03G0500500;TraesCS2A03G1241200;TraesCS2A03G1313500;TraesCS4A03G0180900;TraesCS7A03G0835900;TraesCS7B03G0347800	0
GO:0004420	hydroxymethylglutaryl-CoA reductase (NADPH) activity	0.009026	0.009765	9	1 (11.11%)	TraesCS7D03G0553900	0
GO:1901700	response to oxygen-containing compound	0.009532	0.01	819	4 (0.49%)	TraesCS7D03G0500500;TraesCS2A03G1241200;TraesCS4A03G0180900;TraesCS7B03G0347800	0
GO:0016021	integral component of membrane	0.01	0.02	14562	23 (0.16%)	TraesCS2D03G0055600;TraesCS5D03G0913900;TraesCS7D03G0500500;TraesCS7D03G0553900;TraesCS5D03G1169700;TraesCS5D03G0038400;TraesCS1A03G0405200;TraesCS4D03G0486700;TraesCS1A03G0273200;TraesCS5A03G0864400;TraesCS3B03G0209700;TraesCS2B03G0082600;TraesCS1A03G0986400;TraesCS2B03G1177400;TraesCS3A03G0166500;TraesCS2A03G0325900;TraesCS7A03G1041100;TraesCS5D03G0829100;TraesCS1A03G0781500;TraesCS4A03G0180900…	0
GO:0006950	response to stress	0.01	0.01	3133	8 (0.26%)	TraesCS2B03G0514500;TraesCS2A03G1241200;TraesCS2A03G1313500;TraesCS4A03G0180900;TraesCS2D03G0269600;TraesCS2D03G0668700;TraesCS7A03G0835900;TraesCS7B03G0347800	0
GO:0006979	response to oxidative stress	0.01	0.01	892	4 (0.45%)	TraesCS2A03G1241200;TraesCS2D03G0668700;TraesCS7A03G0835900;TraesCS7B03G0347800	0
GO:2000026	regulation of multicellular organismal development	0.01	0.02	177	2 (1.13%)	TraesCS2B03G0026900;TraesCS2A03G1313500	0
GO:0048580	regulation of post-embryonic development	0.01	0.02	177	2 (1.13%)	TraesCS2B03G0026900;TraesCS2A03G1313500	0
GO:0010214	seed coat development	0.01	0.01	12	1 (8.33%)	TraesCS2A03G1313500	1
GO:0043649	dicarboxylic acid catabolic process	0.01	0.01	12	1 (8.33%)	TraesCS2A03G1313500	1
GO:0032880	regulation of protein localization	0.01	0.01	12	1 (8.33%)	TraesCS2B03G0026900	0
GO:0071554	cell wall organization or biogenesis	0.01	0.02	931	4 (0.43%)	TraesCS2B03G0949900;TraesCS7D03G0991300;TraesCS2B03G0480100;TraesCS5B03G1309300	1
GO:0006561	proline biosynthetic process	0.01	0.02	15	1 (6.67%)	TraesCS3B03G0987700	0
GO:0055129	L-proline biosynthetic process	0.01	0.01	11	1 (9.09%)	TraesCS3B03G0987700	0
GO:0016530	metallochaperone activity	0.01	0.01	13	1 (7.69%)	TraesCS6D03G0785900	1
GO:0016531	copper chaperone activity	0.01	0.01	12	1 (8.33%)	TraesCS6D03G0785900	1
GO:0004791	thioredoxin-disulfide reductase activity	0.01	0.01	10	1 (10%)	TraesCS7B03G0347800	0
GO:0031224	intrinsic component of membrane	0.02	0.02	14654	23 (0.16%)	TraesCS2D03G0055600;TraesCS5D03G0913900;TraesCS7D03G0500500;TraesCS7D03G0553900;TraesCS5D03G1169700;TraesCS5D03G0038400;TraesCS1A03G0405200;TraesCS4D03G0486700;TraesCS1A03G0273200;TraesCS5A03G0864400;TraesCS3B03G0209700;TraesCS2B03G0082600;TraesCS1A03G0986400;TraesCS2B03G1177400;TraesCS3A03G0166500;TraesCS2A03G0325900;TraesCS7A03G1041100;TraesCS5D03G0829100;TraesCS1A03G0781500;TraesCS4A03G0180900…	0
GO:0016757	glycosyltransferase activity	0.02	0.03	2200	6 (0.27%)	TraesCS1D03G0282100;TraesCS7D03G0991300;TraesCS5D03G1052800;TraesCS5A03G1094100;TraesCS7D03G0113400;TraesCS5B03G1309300	0
GO:0016721	oxidoreductase activity, acting on superoxide radicals as acceptor	0.02	0.02	20	1 (5%)	TraesCS2A03G1241200	0
GO:0004784	superoxide dismutase activity	0.02	0.02	20	1 (5%)	TraesCS2A03G1241200	0
GO:0051239	regulation of multicellular organismal process	0.02	0.02	226	2 (0.88%)	TraesCS2B03G0026900;TraesCS2A03G1313500	0
GO:0010154	fruit development	0.02	0.03	237	2 (0.84%)	TraesCS2A03G1313500;TraesCS7A03G1064300	0
GO:0048316	seed development	0.02	0.02	228	2 (0.88%)	TraesCS2A03G1313500;TraesCS7A03G1064300	0
GO:0016405	CoA-ligase activity	0.02	0.02	23	1 (4.35%)	TraesCS2A03G1313500	1
GO:0006560	proline metabolic process	0.02	0.02	21	1 (4.76%)	TraesCS3B03G0987700	0
GO:0019202	amino acid kinase activity	0.02	0.02	22	1 (4.55%)	TraesCS3B03G0987700	0
GO:0009269	response to desiccation	0.02	0.03	24	1 (4.17%)	TraesCS4A03G0180900	0
GO:0004462	lactoylglutathione lyase activity	0.02	0.02	18	1 (5.56%)	TraesCS5B03G1138700	0
GO:0015936	coenzyme A metabolic process	0.02	0.03	24	1 (4.17%)	TraesCS7D03G0553900	0
GO:0016853	isomerase activity	0.03	0.03	637	3 (0.47%)	TraesCS2A03G0017800;TraesCS2B03G0026900;TraesCS2D03G0017900	0
GO:0072593	reactive oxygen species metabolic process	0.03	0.03	665	3 (0.45%)	TraesCS2A03G1241200;TraesCS7A03G0835900;TraesCS7B03G0347800	0
GO:0070887	cellular response to chemical stimulus	0.03	0.03	656	3 (0.46%)	TraesCS2A03G1241200;TraesCS7A03G0835900;TraesCS7B03G0347800	0
GO:1901701	cellular response to oxygen-containing compound	0.03	0.03	249	2 (0.8%)	TraesCS2A03G1241200;TraesCS7B03G0347800	0
GO:1900140	regulation of seedling development	0.03	0.03	29	1 (3.45%)	TraesCS2A03G1313500	1
GO:0010029	regulation of seed germination	0.03	0.03	29	1 (3.45%)	TraesCS2A03G1313500	1
GO:0016878	acid-thiol ligase activity	0.03	0.03	26	1 (3.85%)	TraesCS2A03G1313500	1
GO:0045229	external encapsulating structure organization	0.03	0.04	708	3 (0.42%)	TraesCS7D03G0991300;TraesCS2B03G0480100;TraesCS5B03G1309300	1
GO:0071555	cell wall organization	0.03	0.03	676	3 (0.44%)	TraesCS7D03G0991300;TraesCS2B03G0480100;TraesCS5B03G1309300	1
GO:0008154	actin polymerization or depolymerization	0.03	0.04	34	1 (2.94%)	TraesCS5A03G1126300	0
GO:0051261	protein depolymerization	0.03	0.03	26	1 (3.85%)	TraesCS5A03G1126300	0
GO:0030042	actin filament depolymerization	0.03	0.03	26	1 (3.85%)	TraesCS5A03G1126300	0
GO:0047134	protein-disulfide reductase (NAD(P)) activity	0.03	0.03	27	1 (3.7%)	TraesCS7B03G0347800	0
GO:0005739	mitochondrion	0.04	0.05	1300	4 (0.31%)	TraesCS2A03G1241200;TraesCS6D03G0785900;TraesCS1B03G0717300;TraesCS1A03G0628300	1
GO:0008194	UDP-glycosyltransferase activity	0.04	0.04	1249	4 (0.32%)	TraesCS1D03G0282100;TraesCS5D03G1052800;TraesCS5A03G1094100;TraesCS7D03G0113400	0
GO:0048582	positive regulation of post-embryonic development	0.04	0.04	36	1 (2.78%)	TraesCS2A03G1313500	1
GO:0044036	cell wall macromolecule metabolic process	0.04	0.04	301	2 (0.66%)	TraesCS2B03G0949900;TraesCS7D03G0991300	0
GO:0016774	phosphotransferase activity, carboxyl group as acceptor	0.04	0.04	39	1 (2.56%)	TraesCS3B03G0987700	0
GO:0016668	oxidoreductase activity, acting on a sulfur group of donors, NAD(P) as acceptor	0.04	0.04	37	1 (2.7%)	TraesCS7B03G0347800	0
GO:0030054	cell junction	0.05	0.05	340	2 (0.59%)	TraesCS2B03G0026900;TraesCS2A03G1313500	0
GO:0070161	anchoring junction	0.05	0.05	340	2 (0.59%)	TraesCS2B03G0026900;TraesCS2A03G1313500	0
GO:0005911	cell-cell junction	0.05	0.05	340	2 (0.59%)	TraesCS2B03G0026900;TraesCS2A03G1313500	0
GO:0055044	symplast	0.05	0.05	340	2 (0.59%)	TraesCS2B03G0026900;TraesCS2A03G1313500	0
GO:0009506	plasmodesma	0.05	0.05	340	2 (0.59%)	TraesCS2B03G0026900;TraesCS2A03G1313500	0
GO:0009705	plant-type vacuole membrane	0.05	0.05	47	1 (2.13%)	TraesCS7A03G1041100	1

## Sheet: PG(36_6)_nodes
nodeName	Alt_nodeName	Degree	InternalDegree	Association Strength
PG(36:6)	PG(36:6)	54	54		entire net	subnet
TraesCS5D03G1052800	LOC123123396	252	48	average degree	320.891	35.5636
TraesCS2D03G0055600	TraesCS2D03G0055600	412	44	Strength	0.0248753	0.646612
TraesCS7D03G1177500	LOC123166649	373	44
TraesCS7A03G1041100	NRT2.4	572	44
TraesCS3B03G0209700	LOC123068643	526	43
TraesCS7A03G0835900	prx15	345	46
TraesCS5A03G0211900	OsGELP114	684	42
TraesCS5D03G0829100	OsRCI2-11	620	42
TraesCS2A03G1313500	OsAAE3	753	41
TraesCS2B03G1177400	LOC123046603	549	41
TraesCS5B03G1202400	LOC123114013	747	41
TraesCS7D03G0732100	LOC123164182	764	41
TraesCS7D03G0906100	LOC123165469	473	41
TraesCS1A03G0405200	WDA1	848	40
TraesCS5B03G1309300	LOC123114315	124	52
TraesCS5D03G0230900	LOC123119728	476	39
TraesCS7D03G0593300	OsLTPG22	260	39
TraesCS2B03G0082600	TraesCS2B03G0082600	272	46
TraesCS3A03G0166500	TraesCS3A03G0166500	393	37
TraesCS7D03G0991300	LOC123164299	463	41
TraesCS5B03G1016400	KIN8B	429	41
TraesCS1D03G1012400	LOC123178542	613	38
TraesCS7B03G0471200	LOC123161595	517	37
TraesCS1A03G0273200	TraesCS1A03G0273200	98	43
TraesCS5A03G0564800	LOC123103810	592	37
TraesCS4B03G1005300	LOC123094051	461	39
TraesCS7D03G0115600	LOC123168276	195	39
TraesCS7D03G0069600	LOC542994	178	40
TraesCS7D03G0789500	LOC123164672	172	31
TraesCS3B03G0141200	LOC123068468	351	34
TraesCSU03G0053700	TraesCSU03G0053700	100	52
TraesCS1B03G0654800	SGPP	187	41
TraesCS1D03G0432700	LOC123167947	196	32
TraesCS2B03G0480100	OsPME20	263	32
TraesCS1A03G0264000	TraesCS1A03G0264000	264	31
TraesCS6D03G0785900	COX17-2	169	30
TraesCS1A03G0781500	LOC123163754	159	28
TraesCS2A03G0017800	PIN1	153	33
TraesCS2D03G0269600	LOC123051706	146	41
TraesCS4D03G0115300	LOC123096007	211	25
TraesCS2B03G1321000	LOC123047005	90	30
TraesCS1A03G0628300	RER4	261	24
TraesCS5D03G1235900	LOC123126317	213	24
TraesCS1B03G0717300	RER4	252	21
TraesCS3A03G0719100	LOC123058561	217	19
TraesCS7D03G0960100	LOC123166350	77	19
TraesCS2A03G0251900	LOC123187598	64	17
TraesCS1B03G0794500	LOC123093356	113	37
TraesCS2D03G0679000	GIF1	137	31
TraesCS5D03G0530500	LOC123124838	142	26
TraesCS3D03G0837600	LOC123079953	168	22
TraesCS2D03G0902200	LOC123054129	149	21
TraesCS6D03G0698800	LOC123145583	135	20
TraesCS3B03G0139600	LOC123068466	217	15

## Sheet: PG(36_6)_edges
fromNode	toNode	weight
TraesCS1A03G0264000	PG(36:6)	0.290777
TraesCS1A03G0273200	PG(36:6)	0.293791
TraesCS1A03G0405200	PG(36:6)	0.290377
TraesCS1A03G0628300	PG(36:6)	0.296196
TraesCS1A03G0781500	PG(36:6)	0.288977
TraesCS1B03G0654800	PG(36:6)	0.289608
TraesCS1B03G0717300	PG(36:6)	0.301533
TraesCS1B03G0794500	PG(36:6)	0.292526
TraesCS1D03G0432700	PG(36:6)	0.293969
TraesCS1D03G1012400	PG(36:6)	0.293475
TraesCS2A03G0017800	PG(36:6)	0.290473
TraesCS2A03G0251900	PG(36:6)	0.301809
TraesCS2A03G1313500	PG(36:6)	0.301842
TraesCS2B03G0082600	PG(36:6)	0.31318
TraesCS2B03G0480100	PG(36:6)	0.29104
TraesCS2B03G1177400	PG(36:6)	0.300803
TraesCS2B03G1321000	PG(36:6)	0.296331
TraesCS2D03G0055600	PG(36:6)	0.311655
TraesCS2D03G0269600	PG(36:6)	0.291747
TraesCS2D03G0679000	PG(36:6)	0.289998
TraesCS2D03G0902200	PG(36:6)	0.292859
TraesCS3A03G0166500	PG(36:6)	0.298011
TraesCS3A03G0719100	PG(36:6)	0.295547
TraesCS3B03G0139600	PG(36:6)	0.295126
TraesCS3B03G0141200	PG(36:6)	0.304852
TraesCS3B03G0209700	PG(36:6)	0.303908
TraesCS3D03G0837600	PG(36:6)	0.290043
TraesCS4B03G1005300	PG(36:6)	0.296057
TraesCS4D03G0115300	PG(36:6)	0.296538
TraesCS5A03G0211900	PG(36:6)	0.301961
TraesCS5A03G0564800	PG(36:6)	0.294665
TraesCS5B03G1016400	PG(36:6)	0.309009
TraesCS5B03G1202400	PG(36:6)	0.300549
TraesCS5B03G1309300	PG(36:6)	0.301793
TraesCS5D03G0230900	PG(36:6)	0.29642
TraesCS5D03G0530500	PG(36:6)	0.289327
TraesCS5D03G0829100	PG(36:6)	0.302364
TraesCS5D03G1052800	PG(36:6)	0.310243
TraesCS5D03G1235900	PG(36:6)	0.293957
TraesCS6D03G0698800	PG(36:6)	0.296847
TraesCS6D03G0785900	PG(36:6)	0.295293
TraesCS7A03G0835900	PG(36:6)	0.300864
TraesCS7A03G1041100	PG(36:6)	0.301485
TraesCS7B03G0471200	PG(36:6)	0.290686
TraesCS7D03G0069600	PG(36:6)	0.296718
TraesCS7D03G0115600	PG(36:6)	0.304108
TraesCS7D03G0593300	PG(36:6)	0.290341
TraesCS7D03G0732100	PG(36:6)	0.289863
TraesCS7D03G0789500	PG(36:6)	0.295495
TraesCS7D03G0906100	PG(36:6)	0.294655
TraesCS7D03G0960100	PG(36:6)	0.307012
TraesCS7D03G0991300	PG(36:6)	0.300717
TraesCS7D03G1177500	PG(36:6)	0.313585
TraesCSU03G0053700	PG(36:6)	0.293044
TraesCS1A03G0264000	TraesCS1A03G0273200	0.293163
TraesCS1A03G0264000	TraesCS1A03G0405200	0.33426
TraesCS1A03G0264000	TraesCS1D03G0432700	0.29838
TraesCS1A03G0264000	TraesCS1D03G1012400	0.312494
TraesCS1A03G0264000	TraesCS2A03G1313500	0.317143
TraesCS1A03G0264000	TraesCS2B03G0082600	0.29747
TraesCS1A03G0264000	TraesCS2B03G1177400	0.305304
TraesCS1A03G0264000	TraesCS2D03G0055600	0.30053
TraesCS1A03G0264000	TraesCS3A03G0166500	0.299316
TraesCS1A03G0264000	TraesCS3B03G0141200	0.297304
TraesCS1A03G0264000	TraesCS3B03G0209700	0.305652
TraesCS1A03G0264000	TraesCS4B03G1005300	0.297634
TraesCS1A03G0264000	TraesCS5A03G0211900	0.312142
TraesCS1A03G0264000	TraesCS5A03G0564800	0.306793
TraesCS1A03G0264000	TraesCS5B03G1016400	0.300416
TraesCS1A03G0264000	TraesCS5B03G1202400	0.318135
TraesCS1A03G0264000	TraesCS5B03G1309300	0.29133
TraesCS1A03G0264000	TraesCS5D03G0230900	0.29494
TraesCS1A03G0264000	TraesCS5D03G0530500	0.294596
TraesCS1A03G0264000	TraesCS5D03G0829100	0.307229
TraesCS1A03G0264000	TraesCS5D03G1052800	0.293066
TraesCS1A03G0264000	TraesCS6D03G0785900	0.295635
TraesCS1A03G0264000	TraesCS7A03G0835900	0.294719
TraesCS1A03G0264000	TraesCS7A03G1041100	0.301618
TraesCS1A03G0264000	TraesCS7B03G0471200	0.305008
TraesCS1A03G0264000	TraesCS7D03G0732100	0.315002
TraesCS1A03G0264000	TraesCS7D03G0789500	0.289872
TraesCS1A03G0264000	TraesCS7D03G0906100	0.290232
TraesCS1A03G0264000	TraesCS7D03G0991300	0.298229
TraesCS1A03G0264000	TraesCS7D03G1177500	0.304767
TraesCS1A03G0273200	TraesCS1A03G0405200	0.310775
TraesCS1A03G0273200	TraesCS1A03G0628300	0.293649
TraesCS1A03G0273200	TraesCS1B03G0717300	0.297856
TraesCS1A03G0273200	TraesCS1B03G0794500	0.292838
TraesCS1A03G0273200	TraesCS1D03G1012400	0.300183
TraesCS1A03G0273200	TraesCS2A03G0251900	0.297751
TraesCS1A03G0273200	TraesCS2A03G1313500	0.310219
TraesCS1A03G0273200	TraesCS2B03G0082600	0.304056
TraesCS1A03G0273200	TraesCS2B03G0480100	0.289999
TraesCS1A03G0273200	TraesCS2B03G1177400	0.311746
TraesCS1A03G0273200	TraesCS2B03G1321000	0.302192
TraesCS1A03G0273200	TraesCS2D03G0055600	0.312402
TraesCS1A03G0273200	TraesCS2D03G0679000	0.290908
TraesCS1A03G0273200	TraesCS3A03G0166500	0.306219
TraesCS1A03G0273200	TraesCS3B03G0141200	0.295605
TraesCS1A03G0273200	TraesCS3B03G0209700	0.313474
TraesCS1A03G0273200	TraesCS3D03G0837600	0.290303
TraesCS1A03G0273200	TraesCS4B03G1005300	0.295268
TraesCS1A03G0273200	TraesCS5A03G0211900	0.313567
TraesCS1A03G0273200	TraesCS5A03G0564800	0.295764
TraesCS1A03G0273200	TraesCS5B03G1016400	0.303646
TraesCS1A03G0273200	TraesCS5B03G1202400	0.316954
TraesCS1A03G0273200	TraesCS5B03G1309300	0.290686
TraesCS1A03G0273200	TraesCS5D03G0230900	0.309678
TraesCS1A03G0273200	TraesCS5D03G0829100	0.311701
TraesCS1A03G0273200	TraesCS5D03G1052800	0.3054
TraesCS1A03G0273200	TraesCS5D03G1235900	0.295966
TraesCS1A03G0273200	TraesCS6D03G0698800	0.29837
TraesCS1A03G0273200	TraesCS7A03G0835900	0.301055
TraesCS1A03G0273200	TraesCS7A03G1041100	0.31122
TraesCS1A03G0273200	TraesCS7B03G0471200	0.292455
TraesCS1A03G0273200	TraesCS7D03G0069600	0.29235
TraesCS1A03G0273200	TraesCS7D03G0115600	0.291558
TraesCS1A03G0273200	TraesCS7D03G0593300	0.289434
TraesCS1A03G0273200	TraesCS7D03G0732100	0.307596
TraesCS1A03G0273200	TraesCS7D03G0789500	0.296492
TraesCS1A03G0273200	TraesCS7D03G0906100	0.300799
TraesCS1A03G0273200	TraesCS7D03G0960100	0.2992
TraesCS1A03G0273200	TraesCS7D03G0991300	0.297888
TraesCS1A03G0273200	TraesCS7D03G1177500	0.310785
TraesCS1A03G0273200	TraesCSU03G0053700	0.291873
TraesCS1A03G0405200	TraesCS1A03G0781500	0.317001
TraesCS1A03G0405200	TraesCS1B03G0654800	0.292114
TraesCS1A03G0405200	TraesCS1D03G0432700	0.333533
TraesCS1A03G0405200	TraesCS1D03G1012400	0.341786
TraesCS1A03G0405200	TraesCS2A03G0017800	0.294817
TraesCS1A03G0405200	TraesCS2A03G1313500	0.337222
TraesCS1A03G0405200	TraesCS2B03G0082600	0.321687
TraesCS1A03G0405200	TraesCS2B03G0480100	0.334323
TraesCS1A03G0405200	TraesCS2B03G1177400	0.334766
TraesCS1A03G0405200	TraesCS2D03G0055600	0.325879
TraesCS1A03G0405200	TraesCS3A03G0166500	0.33228
TraesCS1A03G0405200	TraesCS3B03G0141200	0.32863
TraesCS1A03G0405200	TraesCS3B03G0209700	0.33374
TraesCS1A03G0405200	TraesCS4B03G1005300	0.326605
TraesCS1A03G0405200	TraesCS4D03G0115300	0.321524
TraesCS1A03G0405200	TraesCS5A03G0211900	0.341764
TraesCS1A03G0405200	TraesCS5A03G0564800	0.331158
TraesCS1A03G0405200	TraesCS5B03G1016400	0.327893
TraesCS1A03G0405200	TraesCS5B03G1202400	0.340747
TraesCS1A03G0405200	TraesCS5B03G1309300	0.307935
TraesCS1A03G0405200	TraesCS5D03G0230900	0.326639
TraesCS1A03G0405200	TraesCS5D03G0530500	0.324472
TraesCS1A03G0405200	TraesCS5D03G0829100	0.339243
TraesCS1A03G0405200	TraesCS5D03G1052800	0.319373
TraesCS1A03G0405200	TraesCS6D03G0785900	0.328198
TraesCS1A03G0405200	TraesCS7A03G0835900	0.320235
TraesCS1A03G0405200	TraesCS7A03G1041100	0.333025
TraesCS1A03G0405200	TraesCS7B03G0471200	0.345345
TraesCS1A03G0405200	TraesCS7D03G0069600	0.308459
TraesCS1A03G0405200	TraesCS7D03G0115600	0.316535
TraesCS1A03G0405200	TraesCS7D03G0593300	0.321057
TraesCS1A03G0405200	TraesCS7D03G0732100	0.335189
TraesCS1A03G0405200	TraesCS7D03G0789500	0.322638
TraesCS1A03G0405200	TraesCS7D03G0906100	0.330743
TraesCS1A03G0405200	TraesCS7D03G0991300	0.331482
TraesCS1A03G0405200	TraesCS7D03G1177500	0.327904
TraesCS1A03G0405200	TraesCSU03G0053700	0.294242
TraesCS1A03G0628300	TraesCS1B03G0654800	0.32291
TraesCS1A03G0628300	TraesCS1B03G0717300	0.33821
TraesCS1A03G0628300	TraesCS1B03G0794500	0.319678
TraesCS1A03G0628300	TraesCS2A03G0017800	0.311915
TraesCS1A03G0628300	TraesCS2A03G0251900	0.305763
TraesCS1A03G0628300	TraesCS2B03G1321000	0.317476
TraesCS1A03G0628300	TraesCS2D03G0269600	0.328157
TraesCS1A03G0628300	TraesCS2D03G0679000	0.32718
TraesCS1A03G0628300	TraesCS2D03G0902200	0.317828
TraesCS1A03G0628300	TraesCS3A03G0719100	0.346954
TraesCS1A03G0628300	TraesCS3B03G0139600	0.34145
TraesCS1A03G0628300	TraesCS3D03G0837600	0.322054
TraesCS1A03G0628300	TraesCS5B03G1309300	0.30541
TraesCS1A03G0628300	TraesCS5D03G1052800	0.293679
TraesCS1A03G0628300	TraesCS5D03G1235900	0.324984
TraesCS1A03G0628300	TraesCS6D03G0698800	0.317626
TraesCS1A03G0628300	TraesCS7A03G0835900	0.302274
TraesCS1A03G0628300	TraesCS7D03G0069600	0.304988
TraesCS1A03G0628300	TraesCS7D03G0115600	0.289662
TraesCS1A03G0628300	TraesCS7D03G0593300	0.293473
TraesCS1A03G0628300	TraesCS7D03G0960100	0.306866
TraesCS1A03G0628300	TraesCSU03G0053700	0.312867
TraesCS1A03G0781500	TraesCS1B03G0654800	0.289766
TraesCS1A03G0781500	TraesCS1B03G0794500	0.289781
TraesCS1A03G0781500	TraesCS1D03G1012400	0.295351
TraesCS1A03G0781500	TraesCS2A03G1313500	0.319728
TraesCS1A03G0781500	TraesCS2B03G0082600	0.304304
TraesCS1A03G0781500	TraesCS2B03G1177400	0.289445
TraesCS1A03G0781500	TraesCS2D03G0055600	0.301793
TraesCS1A03G0781500	TraesCS2D03G0269600	0.289044
TraesCS1A03G0781500	TraesCS3B03G0141200	0.30116
TraesCS1A03G0781500	TraesCS3B03G0209700	0.292878
TraesCS1A03G0781500	TraesCS4B03G1005300	0.31188
TraesCS1A03G0781500	TraesCS5A03G0211900	0.300474
TraesCS1A03G0781500	TraesCS5A03G0564800	0.314745
TraesCS1A03G0781500	TraesCS5B03G1016400	0.303669
TraesCS1A03G0781500	TraesCS5B03G1202400	0.3056
TraesCS1A03G0781500	TraesCS5B03G1309300	0.293896
TraesCS1A03G0781500	TraesCS5D03G0829100	0.300583
TraesCS1A03G0781500	TraesCS5D03G1052800	0.300069
TraesCS1A03G0781500	TraesCS7A03G1041100	0.300276
TraesCS1A03G0781500	TraesCS7B03G0471200	0.296732
TraesCS1A03G0781500	TraesCS7D03G0115600	0.305036
TraesCS1A03G0781500	TraesCS7D03G0732100	0.308637
TraesCS1A03G0781500	TraesCS7D03G0906100	0.300326
TraesCS1A03G0781500	TraesCS7D03G0991300	0.309565
TraesCS1A03G0781500	TraesCS7D03G1177500	0.30178
TraesCS1A03G0781500	TraesCSU03G0053700	0.295435
TraesCS1B03G0654800	TraesCS1B03G0717300	0.317792
TraesCS1B03G0654800	TraesCS1B03G0794500	0.308834
TraesCS1B03G0654800	TraesCS2A03G0017800	0.298503
TraesCS1B03G0654800	TraesCS2A03G0251900	0.292993
TraesCS1B03G0654800	TraesCS2A03G1313500	0.305617
TraesCS1B03G0654800	TraesCS2B03G0082600	0.303479
TraesCS1B03G0654800	TraesCS2B03G1177400	0.301675
TraesCS1B03G0654800	TraesCS2B03G1321000	0.321501
TraesCS1B03G0654800	TraesCS2D03G0055600	0.313329
TraesCS1B03G0654800	TraesCS2D03G0269600	0.298481
TraesCS1B03G0654800	TraesCS2D03G0679000	0.316285
TraesCS1B03G0654800	TraesCS2D03G0902200	0.30724
TraesCS1B03G0654800	TraesCS3A03G0166500	0.298998
TraesCS1B03G0654800	TraesCS3A03G0719100	0.306984
TraesCS1B03G0654800	TraesCS3B03G0209700	0.311025
TraesCS1B03G0654800	TraesCS3D03G0837600	0.309451
TraesCS1B03G0654800	TraesCS4B03G1005300	0.292659
TraesCS1B03G0654800	TraesCS5A03G0211900	0.308676
TraesCS1B03G0654800	TraesCS5B03G1016400	0.297496
TraesCS1B03G0654800	TraesCS5B03G1202400	0.308832
TraesCS1B03G0654800	TraesCS5B03G1309300	0.289058
TraesCS1B03G0654800	TraesCS5D03G0230900	0.312889
TraesCS1B03G0654800	TraesCS5D03G0829100	0.310369
TraesCS1B03G0654800	TraesCS5D03G1052800	0.31152
TraesCS1B03G0654800	TraesCS5D03G1235900	0.321224
TraesCS1B03G0654800	TraesCS6D03G0698800	0.304323
TraesCS1B03G0654800	TraesCS7A03G0835900	0.307931
TraesCS1B03G0654800	TraesCS7A03G1041100	0.318635
TraesCS1B03G0654800	TraesCS7D03G0069600	0.296398
TraesCS1B03G0654800	TraesCS7D03G0115600	0.303845
TraesCS1B03G0654800	TraesCS7D03G0593300	0.298966
TraesCS1B03G0654800	TraesCS7D03G0732100	0.304985
TraesCS1B03G0654800	TraesCS7D03G0906100	0.312985
TraesCS1B03G0654800	TraesCS7D03G0960100	0.301226
TraesCS1B03G0654800	TraesCS7D03G0991300	0.298197
TraesCS1B03G0654800	TraesCS7D03G1177500	0.307437
TraesCS1B03G0654800	TraesCSU03G0053700	0.296205
TraesCS1B03G0717300	TraesCS1B03G0794500	0.327785
TraesCS1B03G0717300	TraesCS2A03G0017800	0.307728
TraesCS1B03G0717300	TraesCS2A03G0251900	0.317207
TraesCS1B03G0717300	TraesCS2B03G1321000	0.319253
TraesCS1B03G0717300	TraesCS2D03G0269600	0.327849
TraesCS1B03G0717300	TraesCS2D03G0679000	0.331931
TraesCS1B03G0717300	TraesCS2D03G0902200	0.323406
TraesCS1B03G0717300	TraesCS3A03G0719100	0.341116
TraesCS1B03G0717300	TraesCS3B03G0139600	0.345365
TraesCS1B03G0717300	TraesCS3D03G0837600	0.330296
TraesCS1B03G0717300	TraesCS5B03G1309300	0.308805
TraesCS1B03G0717300	TraesCS5D03G1235900	0.334141
TraesCS1B03G0717300	TraesCS6D03G0698800	0.325474
TraesCS1B03G0717300	TraesCS7A03G0835900	0.296235
TraesCS1B03G0717300	TraesCS7D03G0069600	0.302919
TraesCS1B03G0717300	TraesCS7D03G0960100	0.317483
TraesCS1B03G0717300	TraesCSU03G0053700	0.319793
TraesCS1B03G0794500	TraesCS2A03G0017800	0.301718
TraesCS1B03G0794500	TraesCS2A03G0251900	0.308577
TraesCS1B03G0794500	TraesCS2B03G0082600	0.310026
TraesCS1B03G0794500	TraesCS2B03G1321000	0.313138
TraesCS1B03G0794500	TraesCS2D03G0055600	0.307539
TraesCS1B03G0794500	TraesCS2D03G0269600	0.312057
TraesCS1B03G0794500	TraesCS2D03G0679000	0.300795
TraesCS1B03G0794500	TraesCS2D03G0902200	0.318085
TraesCS1B03G0794500	TraesCS3A03G0719100	0.322275
TraesCS1B03G0794500	TraesCS3B03G0139600	0.313986
TraesCS1B03G0794500	TraesCS3B03G0141200	0.293515
TraesCS1B03G0794500	TraesCS3B03G0209700	0.296144
TraesCS1B03G0794500	TraesCS3D03G0837600	0.314408
TraesCS1B03G0794500	TraesCS5A03G0211900	0.289578
TraesCS1B03G0794500	TraesCS5B03G1016400	0.298835
TraesCS1B03G0794500	TraesCS5B03G1309300	0.306191
TraesCS1B03G0794500	TraesCS5D03G0230900	0.293175
TraesCS1B03G0794500	TraesCS5D03G0829100	0.292924
TraesCS1B03G0794500	TraesCS5D03G1052800	0.311554
TraesCS1B03G0794500	TraesCS5D03G1235900	0.314707
TraesCS1B03G0794500	TraesCS6D03G0698800	0.31366
TraesCS1B03G0794500	TraesCS7A03G0835900	0.303077
TraesCS1B03G0794500	TraesCS7A03G1041100	0.298509
TraesCS1B03G0794500	TraesCS7D03G0069600	0.30003
TraesCS1B03G0794500	TraesCS7D03G0115600	0.30945
TraesCS1B03G0794500	TraesCS7D03G0593300	0.295466
TraesCS1B03G0794500	TraesCS7D03G0906100	0.293975
TraesCS1B03G0794500	TraesCS7D03G0960100	0.316176
TraesCS1B03G0794500	TraesCS7D03G0991300	0.293867
TraesCS1B03G0794500	TraesCS7D03G1177500	0.306739
TraesCS1B03G0794500	TraesCSU03G0053700	0.303338
TraesCS1D03G0432700	TraesCS1D03G1012400	0.318318
TraesCS1D03G0432700	TraesCS2A03G1313500	0.325724
TraesCS1D03G0432700	TraesCS2B03G0082600	0.299314
TraesCS1D03G0432700	TraesCS2B03G0480100	0.297201
TraesCS1D03G0432700	TraesCS2B03G1177400	0.310492
TraesCS1D03G0432700	TraesCS2D03G0055600	0.306568
TraesCS1D03G0432700	TraesCS3A03G0166500	0.29553
TraesCS1D03G0432700	TraesCS3B03G0141200	0.305329
TraesCS1D03G0432700	TraesCS3B03G0209700	0.304527
TraesCS1D03G0432700	TraesCS4B03G1005300	0.311008
TraesCS1D03G0432700	TraesCS4D03G0115300	0.293557
TraesCS1D03G0432700	TraesCS5A03G0211900	0.316692
TraesCS1D03G0432700	TraesCS5A03G0564800	0.318472
TraesCS1D03G0432700	TraesCS5B03G1016400	0.311818
TraesCS1D03G0432700	TraesCS5B03G1202400	0.321912
TraesCS1D03G0432700	TraesCS5B03G1309300	0.289807
TraesCS1D03G0432700	TraesCS5D03G0230900	0.295128
TraesCS1D03G0432700	TraesCS5D03G0530500	0.290461
TraesCS1D03G0432700	TraesCS5D03G0829100	0.312201
TraesCS1D03G0432700	TraesCS5D03G1052800	0.292885
TraesCS1D03G0432700	TraesCS6D03G0785900	0.289586
TraesCS1D03G0432700	TraesCS7A03G0835900	0.290573
TraesCS1D03G0432700	TraesCS7A03G1041100	0.304428
TraesCS1D03G0432700	TraesCS7B03G0471200	0.30294
TraesCS1D03G0432700	TraesCS7D03G0732100	0.317467
TraesCS1D03G0432700	TraesCS7D03G0906100	0.30072
TraesCS1D03G0432700	TraesCS7D03G0991300	0.307822
TraesCS1D03G0432700	TraesCS7D03G1177500	0.306248
TraesCS1D03G0432700	TraesCSU03G0053700	0.290718
TraesCS1D03G1012400	TraesCS2A03G1313500	0.322478
TraesCS1D03G1012400	TraesCS2B03G0082600	0.30373
TraesCS1D03G1012400	TraesCS2B03G0480100	0.31325
TraesCS1D03G1012400	TraesCS2B03G1177400	0.308762
TraesCS1D03G1012400	TraesCS2D03G0055600	0.305191
TraesCS1D03G1012400	TraesCS3A03G0166500	0.305659
TraesCS1D03G1012400	TraesCS3B03G0141200	0.31108
TraesCS1D03G1012400	TraesCS3B03G0209700	0.309441
TraesCS1D03G1012400	TraesCS4B03G1005300	0.30251
TraesCS1D03G1012400	TraesCS4D03G0115300	0.307575
TraesCS1D03G1012400	TraesCS5A03G0211900	0.321021
TraesCS1D03G1012400	TraesCS5A03G0564800	0.313996
TraesCS1D03G1012400	TraesCS5B03G1016400	0.308244
TraesCS1D03G1012400	TraesCS5B03G1202400	0.322687
TraesCS1D03G1012400	TraesCS5B03G1309300	0.300129
TraesCS1D03G1012400	TraesCS5D03G0230900	0.297342
TraesCS1D03G1012400	TraesCS5D03G0530500	0.312592
TraesCS1D03G1012400	TraesCS5D03G0829100	0.316153
TraesCS1D03G1012400	TraesCS5D03G1052800	0.298303
TraesCS1D03G1012400	TraesCS6D03G0785900	0.313244
TraesCS1D03G1012400	TraesCS7A03G0835900	0.297373
TraesCS1D03G1012400	TraesCS7A03G1041100	0.308016
TraesCS1D03G1012400	TraesCS7B03G0471200	0.32088
TraesCS1D03G1012400	TraesCS7D03G0069600	0.290826
TraesCS1D03G1012400	TraesCS7D03G0115600	0.298594
TraesCS1D03G1012400	TraesCS7D03G0593300	0.297478
TraesCS1D03G1012400	TraesCS7D03G0732100	0.317275
TraesCS1D03G1012400	TraesCS7D03G0789500	0.302284
TraesCS1D03G1012400	TraesCS7D03G0906100	0.299908
TraesCS1D03G1012400	TraesCS7D03G0991300	0.309183
TraesCS1D03G1012400	TraesCS7D03G1177500	0.308164
TraesCS1D03G1012400	TraesCSU03G0053700	0.291856
TraesCS2A03G0017800	TraesCS2A03G1313500	0.298148
TraesCS2A03G0017800	TraesCS2B03G0082600	0.291833
TraesCS2A03G0017800	TraesCS2B03G1177400	0.302297
TraesCS2A03G0017800	TraesCS2B03G1321000	0.308626
TraesCS2A03G0017800	TraesCS2D03G0055600	0.306002
TraesCS2A03G0017800	TraesCS2D03G0269600	0.297105
TraesCS2A03G0017800	TraesCS2D03G0679000	0.308327
TraesCS2A03G0017800	TraesCS2D03G0902200	0.290986
TraesCS2A03G0017800	TraesCS3A03G0166500	0.298728
TraesCS2A03G0017800	TraesCS3A03G0719100	0.292485
TraesCS2A03G0017800	TraesCS3B03G0209700	0.308834
TraesCS2A03G0017800	TraesCS3D03G0837600	0.302651
TraesCS2A03G0017800	TraesCS5A03G0211900	0.304793
TraesCS2A03G0017800	TraesCS5B03G1202400	0.308777
TraesCS2A03G0017800	TraesCS5D03G0230900	0.312481
TraesCS2A03G0017800	TraesCS5D03G0829100	0.304634
TraesCS2A03G0017800	TraesCS5D03G1052800	0.300929
TraesCS2A03G0017800	TraesCS5D03G1235900	0.314241
TraesCS2A03G0017800	TraesCS6D03G0698800	0.303437
TraesCS2A03G0017800	TraesCS7A03G0835900	0.301095
TraesCS2A03G0017800	TraesCS7A03G1041100	0.311634
TraesCS2A03G0017800	TraesCS7D03G0069600	0.291194
TraesCS2A03G0017800	TraesCS7D03G0593300	0.289756
TraesCS2A03G0017800	TraesCS7D03G0732100	0.303593
TraesCS2A03G0017800	TraesCS7D03G0906100	0.300613
TraesCS2A03G0017800	TraesCS7D03G1177500	0.299564
TraesCS2A03G0017800	TraesCSU03G0053700	0.296102
TraesCS2A03G0251900	TraesCS2D03G0269600	0.300289
TraesCS2A03G0251900	TraesCS2D03G0679000	0.303806
TraesCS2A03G0251900	TraesCS2D03G0902200	0.29402
TraesCS2A03G0251900	TraesCS3A03G0719100	0.305081
TraesCS2A03G0251900	TraesCS3B03G0139600	0.30974
TraesCS2A03G0251900	TraesCS3D03G0837600	0.301194
TraesCS2A03G0251900	TraesCS5B03G1309300	0.305595
TraesCS2A03G0251900	TraesCS5D03G1235900	0.301568
TraesCS2A03G0251900	TraesCS6D03G0698800	0.298477
TraesCS2A03G0251900	TraesCS7D03G0069600	0.293361
TraesCS2A03G0251900	TraesCSU03G0053700	0.309814
TraesCS2A03G1313500	TraesCS2B03G0082600	0.321699
TraesCS2A03G1313500	TraesCS2B03G0480100	0.322113
TraesCS2A03G1313500	TraesCS2B03G1177400	0.317908
TraesCS2A03G1313500	TraesCS2D03G0055600	0.320313
TraesCS2A03G1313500	TraesCS2D03G0269600	0.299946
TraesCS2A03G1313500	TraesCS3A03G0166500	0.317942
TraesCS2A03G1313500	TraesCS3B03G0141200	0.324776
TraesCS2A03G1313500	TraesCS3B03G0209700	0.320822
TraesCS2A03G1313500	TraesCS4B03G1005300	0.322622
TraesCS2A03G1313500	TraesCS4D03G0115300	0.318153
TraesCS2A03G1313500	TraesCS5A03G0211900	0.326056
TraesCS2A03G1313500	TraesCS5A03G0564800	0.326924
TraesCS2A03G1313500	TraesCS5B03G1016400	0.323041
TraesCS2A03G1313500	TraesCS5B03G1202400	0.322115
TraesCS2A03G1313500	TraesCS5B03G1309300	0.315003
TraesCS2A03G1313500	TraesCS5D03G0230900	0.31448
TraesCS2A03G1313500	TraesCS5D03G0530500	0.316036
TraesCS2A03G1313500	TraesCS5D03G0829100	0.325946
TraesCS2A03G1313500	TraesCS5D03G1052800	0.318924
TraesCS2A03G1313500	TraesCS6D03G0785900	0.317947
TraesCS2A03G1313500	TraesCS7A03G0835900	0.316614
TraesCS2A03G1313500	TraesCS7A03G1041100	0.323373
TraesCS2A03G1313500	TraesCS7B03G0471200	0.333062
TraesCS2A03G1313500	TraesCS7D03G0069600	0.307047
TraesCS2A03G1313500	TraesCS7D03G0115600	0.322775
TraesCS2A03G1313500	TraesCS7D03G0593300	0.320433
TraesCS2A03G1313500	TraesCS7D03G0732100	0.324114
TraesCS2A03G1313500	TraesCS7D03G0789500	0.312248
TraesCS2A03G1313500	TraesCS7D03G0906100	0.324682
TraesCS2A03G1313500	TraesCS7D03G0991300	0.327885
TraesCS2A03G1313500	TraesCS7D03G1177500	0.322456
TraesCS2A03G1313500	TraesCSU03G0053700	0.30801
TraesCS2B03G0082600	TraesCS2B03G0480100	0.302822
TraesCS2B03G0082600	TraesCS2B03G1177400	0.303018
TraesCS2B03G0082600	TraesCS2B03G1321000	0.303605
TraesCS2B03G0082600	TraesCS2D03G0055600	0.307397
TraesCS2B03G0082600	TraesCS2D03G0269600	0.304709
TraesCS2B03G0082600	TraesCS2D03G0679000	0.300876
TraesCS2B03G0082600	TraesCS2D03G0902200	0.290001
TraesCS2B03G0082600	TraesCS3A03G0166500	0.290149
TraesCS2B03G0082600	TraesCS3B03G0141200	0.303292
TraesCS2B03G0082600	TraesCS3B03G0209700	0.299694
TraesCS2B03G0082600	TraesCS4B03G1005300	0.311179
TraesCS2B03G0082600	TraesCS4D03G0115300	0.303947
TraesCS2B03G0082600	TraesCS5A03G0211900	0.309067
TraesCS2B03G0082600	TraesCS5A03G0564800	0.313886
TraesCS2B03G0082600	TraesCS5B03G1016400	0.309073
TraesCS2B03G0082600	TraesCS5B03G1202400	0.314719
TraesCS2B03G0082600	TraesCS5B03G1309300	0.312435
TraesCS2B03G0082600	TraesCS5D03G0230900	0.294519
TraesCS2B03G0082600	TraesCS5D03G0530500	0.298401
TraesCS2B03G0082600	TraesCS5D03G0829100	0.306778
TraesCS2B03G0082600	TraesCS5D03G1052800	0.298252
TraesCS2B03G0082600	TraesCS6D03G0785900	0.297659
TraesCS2B03G0082600	TraesCS7A03G0835900	0.297059
TraesCS2B03G0082600	TraesCS7A03G1041100	0.303676
TraesCS2B03G0082600	TraesCS7B03G0471200	0.294719
TraesCS2B03G0082600	TraesCS7D03G0069600	0.296713
TraesCS2B03G0082600	TraesCS7D03G0115600	0.30335
TraesCS2B03G0082600	TraesCS7D03G0593300	0.299305
TraesCS2B03G0082600	TraesCS7D03G0732100	0.314085
TraesCS2B03G0082600	TraesCS7D03G0789500	0.291158
TraesCS2B03G0082600	TraesCS7D03G0906100	0.30303
TraesCS2B03G0082600	TraesCS7D03G0960100	0.289984
TraesCS2B03G0082600	TraesCS7D03G0991300	0.307046
TraesCS2B03G0082600	TraesCS7D03G1177500	0.303656
TraesCS2B03G0082600	TraesCSU03G0053700	0.315577
TraesCS2B03G0480100	TraesCS2B03G1177400	0.307213
TraesCS2B03G0480100	TraesCS2D03G0055600	0.306411
TraesCS2B03G0480100	TraesCS3A03G0166500	0.297452
TraesCS2B03G0480100	TraesCS3B03G0141200	0.301497
TraesCS2B03G0480100	TraesCS3B03G0209700	0.306731
TraesCS2B03G0480100	TraesCS4B03G1005300	0.307578
TraesCS2B03G0480100	TraesCS5A03G0211900	0.314425
TraesCS2B03G0480100	TraesCS5A03G0564800	0.316338
TraesCS2B03G0480100	TraesCS5B03G1016400	0.304543
TraesCS2B03G0480100	TraesCS5B03G1202400	0.32036
TraesCS2B03G0480100	TraesCS5B03G1309300	0.294141
TraesCS2B03G0480100	TraesCS5D03G0230900	0.295803
TraesCS2B03G0480100	TraesCS5D03G0530500	0.293126
TraesCS2B03G0480100	TraesCS5D03G0829100	0.312749
TraesCS2B03G0480100	TraesCS5D03G1052800	0.300859
TraesCS2B03G0480100	TraesCS6D03G0785900	0.293088
TraesCS2B03G0480100	TraesCS7A03G0835900	0.294084
TraesCS2B03G0480100	TraesCS7A03G1041100	0.306722
TraesCS2B03G0480100	TraesCS7B03G0471200	0.30434
TraesCS2B03G0480100	TraesCS7D03G0115600	0.294815
TraesCS2B03G0480100	TraesCS7D03G0732100	0.315015
TraesCS2B03G0480100	TraesCS7D03G0906100	0.299238
TraesCS2B03G0480100	TraesCS7D03G0991300	0.304114
TraesCS2B03G0480100	TraesCS7D03G1177500	0.307832
TraesCS2B03G0480100	TraesCSU03G0053700	0.289241
TraesCS2B03G1177400	TraesCS2D03G0055600	0.308225
TraesCS2B03G1177400	TraesCS2D03G0269600	0.294254
TraesCS2B03G1177400	TraesCS3A03G0166500	0.31621
TraesCS2B03G1177400	TraesCS3B03G0141200	0.298311
TraesCS2B03G1177400	TraesCS3B03G0209700	0.31733
TraesCS2B03G1177400	TraesCS4B03G1005300	0.297681
TraesCS2B03G1177400	TraesCS4D03G0115300	0.29309
TraesCS2B03G1177400	TraesCS5A03G0211900	0.321377
TraesCS2B03G1177400	TraesCS5A03G0564800	0.301526
TraesCS2B03G1177400	TraesCS5B03G1016400	0.298964
TraesCS2B03G1177400	TraesCS5B03G1202400	0.325244
TraesCS2B03G1177400	TraesCS5B03G1309300	0.30949
TraesCS2B03G1177400	TraesCS5D03G0230900	0.311049
TraesCS2B03G1177400	TraesCS5D03G0530500	0.303259
TraesCS2B03G1177400	TraesCS5D03G0829100	0.318277
TraesCS2B03G1177400	TraesCS5D03G1052800	0.307631
TraesCS2B03G1177400	TraesCS6D03G0785900	0.307817
TraesCS2B03G1177400	TraesCS7A03G0835900	0.316642
TraesCS2B03G1177400	TraesCS7A03G1041100	0.317113
TraesCS2B03G1177400	TraesCS7B03G0471200	0.31012
TraesCS2B03G1177400	TraesCS7D03G0069600	0.312366
TraesCS2B03G1177400	TraesCS7D03G0115600	0.301011
TraesCS2B03G1177400	TraesCS7D03G0593300	0.310282
TraesCS2B03G1177400	TraesCS7D03G0732100	0.322787
TraesCS2B03G1177400	TraesCS7D03G0789500	0.314512
TraesCS2B03G1177400	TraesCS7D03G0906100	0.305549
TraesCS2B03G1177400	TraesCS7D03G0991300	0.297754
TraesCS2B03G1177400	TraesCS7D03G1177500	0.309516
TraesCS2B03G1177400	TraesCSU03G0053700	0.30278
TraesCS2B03G1321000	TraesCS2D03G0055600	0.29855
TraesCS2B03G1321000	TraesCS2D03G0269600	0.325555
TraesCS2B03G1321000	TraesCS2D03G0679000	0.31214
TraesCS2B03G1321000	TraesCS2D03G0902200	0.292022
TraesCS2B03G1321000	TraesCS3A03G0166500	0.290975
TraesCS2B03G1321000	TraesCS3A03G0719100	0.312352
TraesCS2B03G1321000	TraesCS3B03G0139600	0.300837
TraesCS2B03G1321000	TraesCS3B03G0209700	0.295471
TraesCS2B03G1321000	TraesCS3D03G0837600	0.295449
TraesCS2B03G1321000	TraesCS5B03G1016400	0.290414
TraesCS2B03G1321000	TraesCS5B03G1309300	0.314146
TraesCS2B03G1321000	TraesCS5D03G0230900	0.291669
TraesCS2B03G1321000	TraesCS5D03G1052800	0.305357
TraesCS2B03G1321000	TraesCS5D03G1235900	0.306023
TraesCS2B03G1321000	TraesCS7A03G0835900	0.313807
TraesCS2B03G1321000	TraesCS7A03G1041100	0.295972
TraesCS2B03G1321000	TraesCS7D03G0069600	0.310281
TraesCS2B03G1321000	TraesCS7D03G0115600	0.304751
TraesCS2B03G1321000	TraesCS7D03G0593300	0.306472
TraesCS2B03G1321000	TraesCS7D03G0789500	0.292388
TraesCS2B03G1321000	TraesCS7D03G1177500	0.303443
TraesCS2B03G1321000	TraesCSU03G0053700	0.317764
TraesCS2D03G0055600	TraesCS2D03G0269600	0.31011
TraesCS2D03G0055600	TraesCS2D03G0679000	0.302059
TraesCS2D03G0055600	TraesCS3A03G0166500	0.305012
TraesCS2D03G0055600	TraesCS3B03G0141200	0.300366
TraesCS2D03G0055600	TraesCS3B03G0209700	0.306683
TraesCS2D03G0055600	TraesCS4B03G1005300	0.308122
TraesCS2D03G0055600	TraesCS4D03G0115300	0.297939
TraesCS2D03G0055600	TraesCS5A03G0211900	0.312854
TraesCS2D03G0055600	TraesCS5A03G0564800	0.30838
TraesCS2D03G0055600	TraesCS5B03G1016400	0.303622
TraesCS2D03G0055600	TraesCS5B03G1202400	0.319898
TraesCS2D03G0055600	TraesCS5B03G1309300	0.317183
TraesCS2D03G0055600	TraesCS5D03G0230900	0.302207
TraesCS2D03G0055600	TraesCS5D03G0530500	0.299993
TraesCS2D03G0055600	TraesCS5D03G0829100	0.310152
TraesCS2D03G0055600	TraesCS5D03G1052800	0.310174
TraesCS2D03G0055600	TraesCS6D03G0785900	0.30238
TraesCS2D03G0055600	TraesCS7A03G0835900	0.313218
TraesCS2D03G0055600	TraesCS7A03G1041100	0.30941
TraesCS2D03G0055600	TraesCS7B03G0471200	0.303573
TraesCS2D03G0055600	TraesCS7D03G0069600	0.310857
TraesCS2D03G0055600	TraesCS7D03G0115600	0.310181
TraesCS2D03G0055600	TraesCS7D03G0593300	0.311946
TraesCS2D03G0055600	TraesCS7D03G0732100	0.319571
TraesCS2D03G0055600	TraesCS7D03G0789500	0.306299
TraesCS2D03G0055600	TraesCS7D03G0906100	0.307635
TraesCS2D03G0055600	TraesCS7D03G0991300	0.30137
TraesCS2D03G0055600	TraesCS7D03G1177500	0.307722
TraesCS2D03G0055600	TraesCSU03G0053700	0.316115
TraesCS2D03G0269600	TraesCS2D03G0679000	0.317197
TraesCS2D03G0269600	TraesCS2D03G0902200	0.317276
TraesCS2D03G0269600	TraesCS3A03G0166500	0.291962
TraesCS2D03G0269600	TraesCS3A03G0719100	0.31638
TraesCS2D03G0269600	TraesCS3B03G0139600	0.291633
TraesCS2D03G0269600	TraesCS3B03G0209700	0.302924
TraesCS2D03G0269600	TraesCS3D03G0837600	0.318003
TraesCS2D03G0269600	TraesCS4B03G1005300	0.291058
TraesCS2D03G0269600	TraesCS5A03G0211900	0.299277
TraesCS2D03G0269600	TraesCS5B03G1016400	0.297773
TraesCS2D03G0269600	TraesCS5B03G1202400	0.299167
TraesCS2D03G0269600	TraesCS5B03G1309300	0.29105
TraesCS2D03G0269600	TraesCS5D03G0230900	0.304107
TraesCS2D03G0269600	TraesCS5D03G0829100	0.301053
TraesCS2D03G0269600	TraesCS5D03G1052800	0.309441
TraesCS2D03G0269600	TraesCS5D03G1235900	0.324207
TraesCS2D03G0269600	TraesCS6D03G0698800	0.312096
TraesCS2D03G0269600	TraesCS7A03G0835900	0.302589
TraesCS2D03G0269600	TraesCS7A03G1041100	0.30918
TraesCS2D03G0269600	TraesCS7D03G0069600	0.294102
TraesCS2D03G0269600	TraesCS7D03G0115600	0.303585
TraesCS2D03G0269600	TraesCS7D03G0593300	0.295636
TraesCS2D03G0269600	TraesCS7D03G0732100	0.296445
TraesCS2D03G0269600	TraesCS7D03G0906100	0.30478
TraesCS2D03G0269600	TraesCS7D03G0960100	0.308531
TraesCS2D03G0269600	TraesCS7D03G0991300	0.296559
TraesCS2D03G0269600	TraesCS7D03G1177500	0.305522
TraesCS2D03G0269600	TraesCSU03G0053700	0.297327
TraesCS2D03G0679000	TraesCS2D03G0902200	0.316175
TraesCS2D03G0679000	TraesCS3A03G0719100	0.329468
TraesCS2D03G0679000	TraesCS3B03G0139600	0.318928
TraesCS2D03G0679000	TraesCS3B03G0209700	0.294172
TraesCS2D03G0679000	TraesCS3D03G0837600	0.317169
TraesCS2D03G0679000	TraesCS5B03G1309300	0.30363
TraesCS2D03G0679000	TraesCS5D03G0230900	0.294509
TraesCS2D03G0679000	TraesCS5D03G1052800	0.308428
TraesCS2D03G0679000	TraesCS5D03G1235900	0.322417
TraesCS2D03G0679000	TraesCS6D03G0698800	0.316332
TraesCS2D03G0679000	TraesCS7A03G0835900	0.30603
TraesCS2D03G0679000	TraesCS7A03G1041100	0.297793
TraesCS2D03G0679000	TraesCS7D03G0069600	0.303314
TraesCS2D03G0679000	TraesCS7D03G0115600	0.303947
TraesCS2D03G0679000	TraesCS7D03G0593300	0.296485
TraesCS2D03G0679000	TraesCS7D03G0906100	0.290905
TraesCS2D03G0679000	TraesCS7D03G0960100	0.310492
TraesCS2D03G0679000	TraesCS7D03G1177500	0.29944
TraesCS2D03G0679000	TraesCSU03G0053700	0.302264
TraesCS2D03G0902200	TraesCS3A03G0719100	0.32426
TraesCS2D03G0902200	TraesCS3B03G0139600	0.327681
TraesCS2D03G0902200	TraesCS3D03G0837600	0.307237
TraesCS2D03G0902200	TraesCS5B03G1309300	0.303446
TraesCS2D03G0902200	TraesCS5D03G1052800	0.289272
TraesCS2D03G0902200	TraesCS5D03G1235900	0.306591
TraesCS2D03G0902200	TraesCS6D03G0698800	0.299679
TraesCS2D03G0902200	TraesCS7D03G0115600	0.293555
TraesCS2D03G0902200	TraesCS7D03G0960100	0.302956
TraesCS2D03G0902200	TraesCSU03G0053700	0.311519
TraesCS3A03G0166500	TraesCS3B03G0209700	0.314371
TraesCS3A03G0166500	TraesCS4B03G1005300	0.293489
TraesCS3A03G0166500	TraesCS5A03G0211900	0.321505
TraesCS3A03G0166500	TraesCS5A03G0564800	0.297947
TraesCS3A03G0166500	TraesCS5B03G1016400	0.294443
TraesCS3A03G0166500	TraesCS5B03G1202400	0.329156
TraesCS3A03G0166500	TraesCS5B03G1309300	0.302975
TraesCS3A03G0166500	TraesCS5D03G0230900	0.312106
TraesCS3A03G0166500	TraesCS5D03G0829100	0.316955
TraesCS3A03G0166500	TraesCS5D03G1052800	0.296341
TraesCS3A03G0166500	TraesCS6D03G0785900	0.292555
TraesCS3A03G0166500	TraesCS7A03G0835900	0.310313
TraesCS3A03G0166500	TraesCS7A03G1041100	0.314785
TraesCS3A03G0166500	TraesCS7B03G0471200	0.294513
TraesCS3A03G0166500	TraesCS7D03G0069600	0.307284
TraesCS3A03G0166500	TraesCS7D03G0593300	0.305981
TraesCS3A03G0166500	TraesCS7D03G0732100	0.323682
TraesCS3A03G0166500	TraesCS7D03G0789500	0.304367
TraesCS3A03G0166500	TraesCS7D03G0906100	0.303856
TraesCS3A03G0166500	TraesCS7D03G0991300	0.292449
TraesCS3A03G0166500	TraesCS7D03G1177500	0.300757
TraesCS3A03G0166500	TraesCSU03G0053700	0.300115
TraesCS3A03G0719100	TraesCS3B03G0139600	0.330109
TraesCS3A03G0719100	TraesCS3D03G0837600	0.336382
TraesCS3A03G0719100	TraesCS5B03G1309300	0.295892
TraesCS3A03G0719100	TraesCS5D03G1235900	0.340794
TraesCS3A03G0719100	TraesCS6D03G0698800	0.319675
TraesCS3A03G0719100	TraesCS7D03G0069600	0.290866
TraesCS3A03G0719100	TraesCS7D03G0960100	0.308035
TraesCS3A03G0719100	TraesCSU03G0053700	0.309711
TraesCS3B03G0139600	TraesCS3D03G0837600	0.338287
TraesCS3B03G0139600	TraesCS5D03G1235900	0.339714
TraesCS3B03G0139600	TraesCS6D03G0698800	0.336359
TraesCS3B03G0139600	TraesCS7D03G0960100	0.304494
TraesCS3B03G0139600	TraesCSU03G0053700	0.298982
TraesCS3B03G0141200	TraesCS3B03G0209700	0.293093
TraesCS3B03G0141200	TraesCS4B03G1005300	0.315393
TraesCS3B03G0141200	TraesCS4D03G0115300	0.30633
TraesCS3B03G0141200	TraesCS5A03G0211900	0.30606
TraesCS3B03G0141200	TraesCS5A03G0564800	0.322143
TraesCS3B03G0141200	TraesCS5B03G1016400	0.310567
TraesCS3B03G0141200	TraesCS5B03G1202400	0.312446
TraesCS3B03G0141200	TraesCS5B03G1309300	0.304614
TraesCS3B03G0141200	TraesCS5D03G0530500	0.300868
TraesCS3B03G0141200	TraesCS5D03G0829100	0.302223
TraesCS3B03G0141200	TraesCS5D03G1052800	0.29537
TraesCS3B03G0141200	TraesCS6D03G0785900	0.29848
TraesCS3B03G0141200	TraesCS7A03G1041100	0.294738
TraesCS3B03G0141200	TraesCS7B03G0471200	0.301463
TraesCS3B03G0141200	TraesCS7D03G0115600	0.301421
TraesCS3B03G0141200	TraesCS7D03G0593300	0.290729
TraesCS3B03G0141200	TraesCS7D03G0732100	0.312701
TraesCS3B03G0141200	TraesCS7D03G0906100	0.296792
TraesCS3B03G0141200	TraesCS7D03G0991300	0.309067
TraesCS3B03G0141200	TraesCS7D03G1177500	0.302728
TraesCS3B03G0141200	TraesCSU03G0053700	0.305051
TraesCS3B03G0209700	TraesCS4B03G1005300	0.301288
TraesCS3B03G0209700	TraesCS5A03G0211900	0.322261
TraesCS3B03G0209700	TraesCS5A03G0564800	0.302436
TraesCS3B03G0209700	TraesCS5B03G1016400	0.298581
TraesCS3B03G0209700	TraesCS5B03G1202400	0.33012
TraesCS3B03G0209700	TraesCS5B03G1309300	0.31188
TraesCS3B03G0209700	TraesCS5D03G0230900	0.314486
TraesCS3B03G0209700	TraesCS5D03G0530500	0.294676
TraesCS3B03G0209700	TraesCS5D03G0829100	0.318101
TraesCS3B03G0209700	TraesCS5D03G1052800	0.306674
TraesCS3B03G0209700	TraesCS6D03G0785900	0.300412
TraesCS3B03G0209700	TraesCS7A03G0835900	0.320782
TraesCS3B03G0209700	TraesCS7A03G1041100	0.316753
TraesCS3B03G0209700	TraesCS7B03G0471200	0.305615
TraesCS3B03G0209700	TraesCS7D03G0069600	0.316115
TraesCS3B03G0209700	TraesCS7D03G0115600	0.301266
TraesCS3B03G0209700	TraesCS7D03G0593300	0.3174
TraesCS3B03G0209700	TraesCS7D03G0732100	0.326601
TraesCS3B03G0209700	TraesCS7D03G0789500	0.312694
TraesCS3B03G0209700	TraesCS7D03G0906100	0.311251
TraesCS3B03G0209700	TraesCS7D03G0991300	0.297533
TraesCS3B03G0209700	TraesCS7D03G1177500	0.305356
TraesCS3B03G0209700	TraesCSU03G0053700	0.308234
TraesCS3D03G0837600	TraesCS5B03G1309300	0.302582
TraesCS3D03G0837600	TraesCS5D03G1052800	0.290978
TraesCS3D03G0837600	TraesCS5D03G1235900	0.314025
TraesCS3D03G0837600	TraesCS6D03G0698800	0.315153
TraesCS3D03G0837600	TraesCS7A03G0835900	0.29016
TraesCS3D03G0837600	TraesCS7D03G0069600	0.297004
TraesCS3D03G0837600	TraesCS7D03G0960100	0.305343
TraesCS3D03G0837600	TraesCSU03G0053700	0.308504
TraesCS4B03G1005300	TraesCS4D03G0115300	0.311571
TraesCS4B03G1005300	TraesCS5A03G0211900	0.312137
TraesCS4B03G1005300	TraesCS5A03G0564800	0.315498
TraesCS4B03G1005300	TraesCS5B03G1016400	0.312952
TraesCS4B03G1005300	TraesCS5B03G1202400	0.312199
TraesCS4B03G1005300	TraesCS5B03G1309300	0.305039
TraesCS4B03G1005300	TraesCS5D03G0230900	0.291849
TraesCS4B03G1005300	TraesCS5D03G0530500	0.304795
TraesCS4B03G1005300	TraesCS5D03G0829100	0.310178
TraesCS4B03G1005300	TraesCS5D03G1052800	0.304852
TraesCS4B03G1005300	TraesCS6D03G0785900	0.30352
TraesCS4B03G1005300	TraesCS7A03G0835900	0.294339
TraesCS4B03G1005300	TraesCS7A03G1041100	0.306821
TraesCS4B03G1005300	TraesCS7B03G0471200	0.313639
TraesCS4B03G1005300	TraesCS7D03G0115600	0.313559
TraesCS4B03G1005300	TraesCS7D03G0593300	0.299823
TraesCS4B03G1005300	TraesCS7D03G0732100	0.31181
TraesCS4B03G1005300	TraesCS7D03G0789500	0.291149
TraesCS4B03G1005300	TraesCS7D03G0906100	0.306027
TraesCS4B03G1005300	TraesCS7D03G0991300	0.317467
TraesCS4B03G1005300	TraesCS7D03G1177500	0.308614
TraesCS4B03G1005300	TraesCSU03G0053700	0.30109
TraesCS4D03G0115300	TraesCS5A03G0211900	0.298342
TraesCS4D03G0115300	TraesCS5A03G0564800	0.319349
TraesCS4D03G0115300	TraesCS5B03G1016400	0.308075
TraesCS4D03G0115300	TraesCS5B03G1202400	0.304184
TraesCS4D03G0115300	TraesCS5B03G1309300	0.292882
TraesCS4D03G0115300	TraesCS5D03G0530500	0.292159
TraesCS4D03G0115300	TraesCS5D03G0829100	0.295116
TraesCS4D03G0115300	TraesCS5D03G1052800	0.294099
TraesCS4D03G0115300	TraesCS7A03G1041100	0.2891
TraesCS4D03G0115300	TraesCS7B03G0471200	0.298262
TraesCS4D03G0115300	TraesCS7D03G0115600	0.295331
TraesCS4D03G0115300	TraesCS7D03G0732100	0.304209
TraesCS4D03G0115300	TraesCS7D03G0991300	0.304604
TraesCS4D03G0115300	TraesCS7D03G1177500	0.302581
TraesCS4D03G0115300	TraesCSU03G0053700	0.293909
TraesCS5A03G0211900	TraesCS5A03G0564800	0.315707
TraesCS5A03G0211900	TraesCS5B03G1016400	0.306026
TraesCS5A03G0211900	TraesCS5B03G1202400	0.331254
TraesCS5A03G0211900	TraesCS5B03G1309300	0.313145
TraesCS5A03G0211900	TraesCS5D03G0230900	0.317722
TraesCS5A03G0211900	TraesCS5D03G0530500	0.305535
TraesCS5A03G0211900	TraesCS5D03G0829100	0.322819
TraesCS5A03G0211900	TraesCS5D03G1052800	0.313088
TraesCS5A03G0211900	TraesCS6D03G0785900	0.310548
TraesCS5A03G0211900	TraesCS7A03G0835900	0.322727
TraesCS5A03G0211900	TraesCS7A03G1041100	0.321841
TraesCS5A03G0211900	TraesCS7B03G0471200	0.321932
TraesCS5A03G0211900	TraesCS7D03G0069600	0.314562
TraesCS5A03G0211900	TraesCS7D03G0115600	0.310189
TraesCS5A03G0211900	TraesCS7D03G0593300	0.320912
TraesCS5A03G0211900	TraesCS7D03G0732100	0.32969
TraesCS5A03G0211900	TraesCS7D03G0789500	0.316571
TraesCS5A03G0211900	TraesCS7D03G0906100	0.316613
TraesCS5A03G0211900	TraesCS7D03G0991300	0.309089
TraesCS5A03G0211900	TraesCS7D03G1177500	0.314712
TraesCS5A03G0211900	TraesCSU03G0053700	0.306417
TraesCS5A03G0564800	TraesCS5B03G1016400	0.31734
TraesCS5A03G0564800	TraesCS5B03G1202400	0.316417
TraesCS5A03G0564800	TraesCS5B03G1309300	0.303992
TraesCS5A03G0564800	TraesCS5D03G0230900	0.290994
TraesCS5A03G0564800	TraesCS5D03G0530500	0.313107
TraesCS5A03G0564800	TraesCS5D03G0829100	0.312883
TraesCS5A03G0564800	TraesCS5D03G1052800	0.305725
TraesCS5A03G0564800	TraesCS6D03G0785900	0.311218
TraesCS5A03G0564800	TraesCS7A03G0835900	0.29353
TraesCS5A03G0564800	TraesCS7A03G1041100	0.306545
TraesCS5A03G0564800	TraesCS7B03G0471200	0.321567
TraesCS5A03G0564800	TraesCS7D03G0115600	0.313548
TraesCS5A03G0564800	TraesCS7D03G0593300	0.297489
TraesCS5A03G0564800	TraesCS7D03G0732100	0.311876
TraesCS5A03G0564800	TraesCS7D03G0789500	0.294622
TraesCS5A03G0564800	TraesCS7D03G0906100	0.307344
TraesCS5A03G0564800	TraesCS7D03G0991300	0.320193
TraesCS5A03G0564800	TraesCS7D03G1177500	0.310657
TraesCS5A03G0564800	TraesCSU03G0053700	0.297247
TraesCS5B03G1016400	TraesCS5B03G1202400	0.312907
TraesCS5B03G1016400	TraesCS5B03G1309300	0.311882
TraesCS5B03G1016400	TraesCS5D03G0530500	0.306757
TraesCS5B03G1016400	TraesCS5D03G0829100	0.303973
TraesCS5B03G1016400	TraesCS5D03G1052800	0.303598
TraesCS5B03G1016400	TraesCS6D03G0785900	0.305564
TraesCS5B03G1016400	TraesCS7A03G0835900	0.298161
TraesCS5B03G1016400	TraesCS7A03G1041100	0.301169
TraesCS5B03G1016400	TraesCS7B03G0471200	0.308716
TraesCS5B03G1016400	TraesCS7D03G0069600	0.294867
TraesCS5B03G1016400	TraesCS7D03G0115600	0.309845
TraesCS5B03G1016400	TraesCS7D03G0593300	0.300784
TraesCS5B03G1016400	TraesCS7D03G0732100	0.31502
TraesCS5B03G1016400	TraesCS7D03G0789500	0.295779
TraesCS5B03G1016400	TraesCS7D03G0906100	0.297754
TraesCS5B03G1016400	TraesCS7D03G0991300	0.307635
TraesCS5B03G1016400	TraesCS7D03G1177500	0.306073
TraesCS5B03G1016400	TraesCSU03G0053700	0.311063
TraesCS5B03G1202400	TraesCS5B03G1309300	0.314638
TraesCS5B03G1202400	TraesCS5D03G0230900	0.32624
TraesCS5B03G1202400	TraesCS5D03G0530500	0.311376
TraesCS5B03G1202400	TraesCS5D03G0829100	0.330877
TraesCS5B03G1202400	TraesCS5D03G1052800	0.318521
TraesCS5B03G1202400	TraesCS6D03G0785900	0.316873
TraesCS5B03G1202400	TraesCS7A03G0835900	0.327446
TraesCS5B03G1202400	TraesCS7A03G1041100	0.329461
TraesCS5B03G1202400	TraesCS7B03G0471200	0.329448
TraesCS5B03G1202400	TraesCS7D03G0069600	0.318477
TraesCS5B03G1202400	TraesCS7D03G0115600	0.314171
TraesCS5B03G1202400	TraesCS7D03G0593300	0.326647
TraesCS5B03G1202400	TraesCS7D03G0732100	0.327076
TraesCS5B03G1202400	TraesCS7D03G0789500	0.322776
TraesCS5B03G1202400	TraesCS7D03G0906100	0.323714
TraesCS5B03G1202400	TraesCS7D03G0991300	0.316425
TraesCS5B03G1202400	TraesCS7D03G1177500	0.320946
TraesCS5B03G1202400	TraesCSU03G0053700	0.305813
TraesCS5B03G1309300	TraesCS5D03G0230900	0.307212
TraesCS5B03G1309300	TraesCS5D03G0530500	0.292296
TraesCS5B03G1309300	TraesCS5D03G0829100	0.312802
TraesCS5B03G1309300	TraesCS5D03G1052800	0.312012
TraesCS5B03G1309300	TraesCS5D03G1235900	0.305717
TraesCS5B03G1309300	TraesCS6D03G0698800	0.304324
TraesCS5B03G1309300	TraesCS6D03G0785900	0.292389
TraesCS5B03G1309300	TraesCS7A03G0835900	0.301717
TraesCS5B03G1309300	TraesCS7A03G1041100	0.313019
TraesCS5B03G1309300	TraesCS7B03G0471200	0.295418
TraesCS5B03G1309300	TraesCS7D03G0069600	0.292868
TraesCS5B03G1309300	TraesCS7D03G0115600	0.303788
TraesCS5B03G1309300	TraesCS7D03G0593300	0.291916
TraesCS5B03G1309300	TraesCS7D03G0732100	0.307521
TraesCS5B03G1309300	TraesCS7D03G0789500	0.294264
TraesCS5B03G1309300	TraesCS7D03G0906100	0.307277
TraesCS5B03G1309300	TraesCS7D03G0960100	0.311083
TraesCS5B03G1309300	TraesCS7D03G0991300	0.307227
TraesCS5B03G1309300	TraesCS7D03G1177500	0.315465
TraesCS5B03G1309300	TraesCSU03G0053700	0.300952
TraesCS5D03G0230900	TraesCS5D03G0829100	0.313922
TraesCS5D03G0230900	TraesCS5D03G1052800	0.304342
TraesCS5D03G0230900	TraesCS6D03G0785900	0.2916
TraesCS5D03G0230900	TraesCS7A03G0835900	0.321423
TraesCS5D03G0230900	TraesCS7A03G1041100	0.316556
TraesCS5D03G0230900	TraesCS7B03G0471200	0.298136
TraesCS5D03G0230900	TraesCS7D03G0069600	0.316441
TraesCS5D03G0230900	TraesCS7D03G0115600	0.297415
TraesCS5D03G0230900	TraesCS7D03G0593300	0.319017
TraesCS5D03G0230900	TraesCS7D03G0732100	0.323964
TraesCS5D03G0230900	TraesCS7D03G0789500	0.309666
TraesCS5D03G0230900	TraesCS7D03G0906100	0.307196
TraesCS5D03G0230900	TraesCS7D03G0991300	0.288984
TraesCS5D03G0230900	TraesCS7D03G1177500	0.300661
TraesCS5D03G0230900	TraesCSU03G0053700	0.303912
TraesCS5D03G0530500	TraesCS5D03G0829100	0.301426
TraesCS5D03G0530500	TraesCS5D03G1052800	0.29202
TraesCS5D03G0530500	TraesCS7A03G1041100	0.292212
TraesCS5D03G0530500	TraesCS7B03G0471200	0.294814
TraesCS5D03G0530500	TraesCS7D03G0732100	0.306159
TraesCS5D03G0530500	TraesCS7D03G0991300	0.299056
TraesCS5D03G0530500	TraesCS7D03G1177500	0.301203
TraesCS5D03G0829100	TraesCS5D03G1052800	0.311712
TraesCS5D03G0829100	TraesCS6D03G0785900	0.306148
TraesCS5D03G0829100	TraesCS7A03G0835900	0.320235
TraesCS5D03G0829100	TraesCS7A03G1041100	0.318563
TraesCS5D03G0829100	TraesCS7B03G0471200	0.315955
TraesCS5D03G0829100	TraesCS7D03G0069600	0.312963
TraesCS5D03G0829100	TraesCS7D03G0115600	0.309471
TraesCS5D03G0829100	TraesCS7D03G0593300	0.317893
TraesCS5D03G0829100	TraesCS7D03G0732100	0.328607
TraesCS5D03G0829100	TraesCS7D03G0789500	0.312964
TraesCS5D03G0829100	TraesCS7D03G0906100	0.315473
TraesCS5D03G0829100	TraesCS7D03G0991300	0.305165
TraesCS5D03G0829100	TraesCS7D03G1177500	0.311516
TraesCS5D03G0829100	TraesCSU03G0053700	0.307015
TraesCS5D03G1052800	TraesCS5D03G1235900	0.297228
TraesCS5D03G1052800	TraesCS6D03G0785900	0.293809
TraesCS5D03G1052800	TraesCS7A03G0835900	0.304158
TraesCS5D03G1052800	TraesCS7A03G1041100	0.311566
TraesCS5D03G1052800	TraesCS7B03G0471200	0.290962
TraesCS5D03G1052800	TraesCS7D03G0069600	0.303761
TraesCS5D03G1052800	TraesCS7D03G0115600	0.300936
TraesCS5D03G1052800	TraesCS7D03G0593300	0.303006
TraesCS5D03G1052800	TraesCS7D03G0732100	0.316748
TraesCS5D03G1052800	TraesCS7D03G0789500	0.294614
TraesCS5D03G1052800	TraesCS7D03G0906100	0.307934
TraesCS5D03G1052800	TraesCS7D03G0991300	0.301868
TraesCS5D03G1052800	TraesCS7D03G1177500	0.304537
TraesCS5D03G1052800	TraesCSU03G0053700	0.314504
TraesCS5D03G1235900	TraesCS6D03G0698800	0.318218
TraesCS5D03G1235900	TraesCS7A03G0835900	0.305388
TraesCS5D03G1235900	TraesCS7D03G0069600	0.30827
TraesCS5D03G1235900	TraesCS7D03G0115600	0.289717
TraesCS5D03G1235900	TraesCS7D03G0593300	0.293322
TraesCS5D03G1235900	TraesCS7D03G0960100	0.304983
TraesCS5D03G1235900	TraesCSU03G0053700	0.310039
TraesCS6D03G0698800	TraesCS7A03G0835900	0.293285
TraesCS6D03G0698800	TraesCS7D03G0069600	0.302401
TraesCS6D03G0698800	TraesCS7D03G0960100	0.292141
TraesCS6D03G0698800	TraesCSU03G0053700	0.310198
TraesCS6D03G0785900	TraesCS7A03G0835900	0.292533
TraesCS6D03G0785900	TraesCS7A03G1041100	0.29815
TraesCS6D03G0785900	TraesCS7B03G0471200	0.296074
TraesCS6D03G0785900	TraesCS7D03G0732100	0.311434
TraesCS6D03G0785900	TraesCS7D03G0906100	0.292516
TraesCS6D03G0785900	TraesCS7D03G0991300	0.298839
TraesCS6D03G0785900	TraesCS7D03G1177500	0.302372
TraesCS6D03G0785900	TraesCSU03G0053700	0.290647
TraesCS7A03G0835900	TraesCS7A03G1041100	0.323669
TraesCS7A03G0835900	TraesCS7B03G0471200	0.292688
TraesCS7A03G0835900	TraesCS7D03G0069600	0.304405
TraesCS7A03G0835900	TraesCS7D03G0115600	0.292231
TraesCS7A03G0835900	TraesCS7D03G0593300	0.30239
TraesCS7A03G0835900	TraesCS7D03G0732100	0.322573
TraesCS7A03G0835900	TraesCS7D03G0789500	0.304282
TraesCS7A03G0835900	TraesCS7D03G0906100	0.312749
TraesCS7A03G0835900	TraesCS7D03G0960100	0.290737
TraesCS7A03G0835900	TraesCS7D03G0991300	0.297475
TraesCS7A03G0835900	TraesCS7D03G1177500	0.307994
TraesCS7A03G0835900	TraesCSU03G0053700	0.305449
TraesCS7A03G1041100	TraesCS7B03G0471200	0.308581
TraesCS7A03G1041100	TraesCS7D03G0069600	0.316518
TraesCS7A03G1041100	TraesCS7D03G0115600	0.308926
TraesCS7A03G1041100	TraesCS7D03G0593300	0.321967
TraesCS7A03G1041100	TraesCS7D03G0732100	0.329458
TraesCS7A03G1041100	TraesCS7D03G0789500	0.311102
TraesCS7A03G1041100	TraesCS7D03G0906100	0.318724
TraesCS7A03G1041100	TraesCS7D03G0991300	0.302618
TraesCS7A03G1041100	TraesCS7D03G1177500	0.308406
TraesCS7A03G1041100	TraesCSU03G0053700	0.309365
TraesCS7B03G0471200	TraesCS7D03G0115600	0.292736
TraesCS7B03G0471200	TraesCS7D03G0593300	0.297376
TraesCS7B03G0471200	TraesCS7D03G0732100	0.327156
TraesCS7B03G0471200	TraesCS7D03G0789500	0.288997
TraesCS7B03G0471200	TraesCS7D03G0906100	0.306441
TraesCS7B03G0471200	TraesCS7D03G0991300	0.311417
TraesCS7B03G0471200	TraesCS7D03G1177500	0.300993
TraesCS7B03G0471200	TraesCSU03G0053700	0.292348
TraesCS7D03G0069600	TraesCS7D03G0593300	0.290683
TraesCS7D03G0069600	TraesCS7D03G0732100	0.311827
TraesCS7D03G0069600	TraesCS7D03G0789500	0.296306
TraesCS7D03G0069600	TraesCS7D03G0906100	0.304215
TraesCS7D03G0069600	TraesCS7D03G0960100	0.294932
TraesCS7D03G0069600	TraesCS7D03G0991300	0.29066
TraesCS7D03G0069600	TraesCS7D03G1177500	0.306615
TraesCS7D03G0069600	TraesCSU03G0053700	0.298874
TraesCS7D03G0115600	TraesCS7D03G0593300	0.29241
TraesCS7D03G0115600	TraesCS7D03G0732100	0.313832
TraesCS7D03G0115600	TraesCS7D03G0906100	0.310601
TraesCS7D03G0115600	TraesCS7D03G0991300	0.311421
TraesCS7D03G0115600	TraesCS7D03G1177500	0.305061
TraesCS7D03G0115600	TraesCSU03G0053700	0.309412
TraesCS7D03G0593300	TraesCS7D03G0732100	0.322559
TraesCS7D03G0593300	TraesCS7D03G0789500	0.291183
TraesCS7D03G0593300	TraesCS7D03G0906100	0.314356
TraesCS7D03G0593300	TraesCS7D03G0991300	0.305688
TraesCS7D03G0593300	TraesCS7D03G1177500	0.306106
TraesCS7D03G0593300	TraesCSU03G0053700	0.29782
TraesCS7D03G0732100	TraesCS7D03G0789500	0.315924
TraesCS7D03G0732100	TraesCS7D03G0906100	0.326545
TraesCS7D03G0732100	TraesCS7D03G0991300	0.319025
TraesCS7D03G0732100	TraesCS7D03G1177500	0.320102
TraesCS7D03G0732100	TraesCSU03G0053700	0.298353
TraesCS7D03G0789500	TraesCS7D03G0906100	0.299381
TraesCS7D03G0789500	TraesCS7D03G0991300	0.290476
TraesCS7D03G0789500	TraesCS7D03G1177500	0.303032
TraesCS7D03G0789500	TraesCSU03G0053700	0.294955
TraesCS7D03G0906100	TraesCS7D03G0991300	0.304325
TraesCS7D03G0906100	TraesCS7D03G1177500	0.305302
TraesCS7D03G0906100	TraesCSU03G0053700	0.304074
TraesCS7D03G0960100	TraesCSU03G0053700	0.316741
TraesCS7D03G0991300	TraesCS7D03G1177500	0.302541
TraesCS7D03G0991300	TraesCSU03G0053700	0.306414
TraesCS7D03G1177500	TraesCSU03G0053700	0.315535

## Sheet: PG(36_6)_GO
Gene Count:	41
Background Gene Count:	75477
Ontology:	E:\GOAnalyzer\Deployment\Data\gofiles\go-basic.obo
Annotation:	E:\GOAnalyzer\Deployment\data\gofiles\Gene-GO_association.wheat2022
Hierarchy:	All
Correction:	BH FDR p-value adjustment
Max Path Length From Leaf:	N/A
Min Path Length From Root:	3
GO ID	Description	P-Value	Corrected P-Value	Total Genes	Matched Gene Counts	Matched Genes
GO:0009528	plastid inner membrane	0.000124	0.0001311	30	2 (6.67%)	TraesCS1B03G0717300;TraesCS1A03G0628300	1
GO:0009706	chloroplast inner membrane	0.000124	0.0001311	30	2 (6.67%)	TraesCS1B03G0717300;TraesCS1A03G0628300	1
GO:0006869	lipid transport	0.0005425	0.0005732	291	3 (1.03%)	TraesCS3B03G0141200;TraesCSU03G0053700;TraesCS3B03G0139600	1
GO:0010876	lipid localization	0.0005926	0.0006259	300	3 (1%)	TraesCS3B03G0141200;TraesCSU03G0053700;TraesCS3B03G0139600	1
GO:0031969	chloroplast membrane	0.0009527	0.001006	83	2 (2.41%)	TraesCS1B03G0717300;TraesCS1A03G0628300	1
GO:0052575	carbohydrate localization	0.001086	0.001147	2	1 (50%)	TraesCS2D03G0679000	0
GO:0052576	carbohydrate storage	0.001086	0.001147	2	1 (50%)	TraesCS2D03G0679000	0
GO:0033609	oxalate metabolic process	0.001629	0.001719	3	1 (33.33%)	TraesCS2A03G1313500	1
GO:0033611	oxalate catabolic process	0.001629	0.001719	3	1 (33.33%)	TraesCS2A03G1313500	1
GO:0050203	oxalate-CoA ligase activity	0.001629	0.001719	3	1 (33.33%)	TraesCS2A03G1313500	1
GO:0050832	defense response to fungus	0.001815	0.001916	115	2 (1.74%)	TraesCS2D03G0679000;TraesCS2A03G1313500	0
GO:0009620	response to fungus	0.002206	0.002328	127	2 (1.57%)	TraesCS2D03G0679000;TraesCS2A03G1313500	0
GO:0008289	lipid binding	0.002838	0.002994	519	3 (0.58%)	TraesCS3B03G0141200;TraesCSU03G0053700;TraesCS3B03G0139600	0
GO:0010030	positive regulation of seed germination	0.004338	0.004575	8	1 (12.5%)	TraesCS2A03G1313500	1
GO:0015112	nitrate transmembrane transporter activity	0.004338	0.004575	8	1 (12.5%)	TraesCS7A03G1041100	1
GO:0071555	cell wall organization	0.005921	0.006244	676	3 (0.44%)	TraesCS7D03G0991300;TraesCS2B03G0480100;TraesCS5B03G1309300	1
GO:0010214	seed coat development	0.0065	0.006852	12	1 (8.33%)	TraesCS2A03G1313500	1
GO:0043649	dicarboxylic acid catabolic process	0.0065	0.006852	12	1 (8.33%)	TraesCS2A03G1313500	1
GO:0016531	copper chaperone activity	0.0065	0.006852	12	1 (8.33%)	TraesCS6D03G0785900	1
GO:0045229	external encapsulating structure organization	0.006723	0.007086	708	3 (0.42%)	TraesCS7D03G0991300;TraesCS2B03G0480100;TraesCS5B03G1309300	1
GO:0016530	metallochaperone activity	0.007039	0.007418	13	1 (7.69%)	TraesCS6D03G0785900	1
GO:0006952	defense response	0.007283	0.007673	729	3 (0.41%)	TraesCS2D03G0679000;TraesCS2A03G1313500;TraesCS2D03G0269600	0
GO:0033036	macromolecule localization	0.008226	0.008664	1472	4 (0.27%)	TraesCS3B03G0141200;TraesCSU03G0053700;TraesCS2D03G0679000;TraesCS3B03G0139600	0
GO:0098542	defense response to other organism	0.01	0.01	309	2 (0.65%)	TraesCS2D03G0679000;TraesCS2A03G1313500	0
GO:0016405	CoA-ligase activity	0.01	0.01	23	1 (4.35%)	TraesCS2A03G1313500	1
GO:0016878	acid-thiol ligase activity	0.01	0.01	26	1 (3.85%)	TraesCS2A03G1313500	1
GO:0071554	cell wall organization or biogenesis	0.01	0.01	931	3 (0.32%)	TraesCS7D03G0991300;TraesCS2B03G0480100;TraesCS5B03G1309300	1
GO:0019866	organelle inner membrane	0.02	0.02	379	2 (0.53%)	TraesCS1B03G0717300;TraesCS1A03G0628300	0
GO:0009941	chloroplast envelope	0.02	0.02	371	2 (0.54%)	TraesCS1B03G0717300;TraesCS1A03G0628300	0
GO:1900140	regulation of seedling development	0.02	0.02	29	1 (3.45%)	TraesCS2A03G1313500	1
GO:0010029	regulation of seed germination	0.02	0.02	29	1 (3.45%)	TraesCS2A03G1313500	1
GO:0048582	positive regulation of post-embryonic development	0.02	0.02	36	1 (2.78%)	TraesCS2A03G1313500	1
GO:0009607	response to biotic stimulus	0.02	0.02	427	2 (0.47%)	TraesCS2D03G0679000;TraesCS2A03G1313500	0
GO:0043207	response to external biotic stimulus	0.02	0.02	348	2 (0.57%)	TraesCS2D03G0679000;TraesCS2A03G1313500	0
GO:0051707	response to other organism	0.02	0.02	348	2 (0.57%)	TraesCS2D03G0679000;TraesCS2A03G1313500	0
GO:0004564	beta-fructofuranosidase activity	0.02	0.02	35	1 (2.86%)	TraesCS2D03G0679000	0
GO:0005739	mitochondrion	0.03	0.04	1300	3 (0.23%)	TraesCS6D03G0785900;TraesCS1B03G0717300;TraesCS1A03G0628300	1
GO:0031090	organelle membrane	0.03	0.03	2225	4 (0.18%)	TraesCS1B03G0717300;TraesCS7A03G1041100;TraesCS1A03G0628300;TraesCS5B03G1309300	0
GO:0042170	plastid membrane	0.03	0.03	518	2 (0.39%)	TraesCS1B03G0717300;TraesCS1A03G0628300	0
GO:0051094	positive regulation of developmental process	0.03	0.03	58	1 (1.72%)	TraesCS2A03G1313500	0
GO:0051240	positive regulation of multicellular organismal process	0.03	0.03	51	1 (1.96%)	TraesCS2A03G1313500	0
GO:0048046	apoplast	0.03	0.03	524	2 (0.38%)	TraesCS7D03G0991300;TraesCS2A03G1313500	0
GO:0030312	external encapsulating structure	0.03	0.03	519	2 (0.39%)	TraesCS7D03G0991300;TraesCS2B03G0480100	0
GO:0005618	cell wall	0.03	0.03	504	2 (0.4%)	TraesCS7D03G0991300;TraesCS2B03G0480100	0
GO:0009705	plant-type vacuole membrane	0.03	0.03	47	1 (2.13%)	TraesCS7A03G1041100	1
GO:0004364	glutathione transferase activity	0.03	0.03	57	1 (1.75%)	TraesCS7D03G0069600	0
GO:0016020	membrane	0.04	0.05	17900	15 (0.08%)	TraesCS2D03G0055600;TraesCS1A03G0405200;TraesCS1A03G0273200;TraesCS3B03G0209700;TraesCS2B03G0082600;TraesCS1A03G0628300;TraesCS3B03G0141200;TraesCS2B03G1177400;TraesCS3A03G0166500;TraesCS1B03G0717300;TraesCS7A03G1041100;TraesCS5D03G0829100;TraesCS1A03G0781500;TraesCS5B03G1309300;TraesCS7D03G0906100	1
GO:0031975	envelope	0.04	0.04	1355	3 (0.22%)	TraesCS6D03G0785900;TraesCS1B03G0717300;TraesCS1A03G0628300	0
GO:0031967	organelle envelope	0.04	0.04	1355	3 (0.22%)	TraesCS6D03G0785900;TraesCS1B03G0717300;TraesCS1A03G0628300	0
GO:0004553	hydrolase activity, hydrolyzing O-glycosyl compounds	0.04	0.05	1463	3 (0.21%)	TraesCS7D03G0991300;TraesCS1B03G0794500;TraesCS2D03G0679000	0
GO:0009735	response to cytokinin	0.04	0.04	79	1 (1.27%)	TraesCS2A03G1313500	0
GO:0009605	response to external stimulus	0.04	0.04	580	2 (0.34%)	TraesCS2D03G0679000;TraesCS2A03G1313500	0
GO:0016877	ligase activity, forming carbon-sulfur bonds	0.04	0.04	77	1 (1.3%)	TraesCS2A03G1313500	0
GO:0045330	aspartyl esterase activity	0.04	0.04	79	1 (1.27%)	TraesCS2B03G0480100	0
GO:0000325	plant-type vacuole	0.04	0.04	69	1 (1.45%)	TraesCS7A03G1041100	0
GO:0046686	response to cadmium ion	0.05	0.05	87	1 (1.15%)	TraesCS2A03G1313500	0
GO:0045490	pectin catabolic process	0.05	0.05	90	1 (1.11%)	TraesCS2B03G0480100	0
