# Supplementary material for: Computational genomics insights into cold acclimation in wheat
Source: Front Genet. 2022 Oct 20;13:1015673. doi: 10.3389/fgene.2022.1015673 (PMC9632429; doi:10.3389/fgene.2022.1015673)
Supplement: Supplementary file 9 [file Table7.XLSX]

## Sheet: Gene-GO_association
! Supplementary File S8 | Gene-GO associations used for gene ontology enrichment analysis of this study
!
! User Defined: Dec, 2021													0
! Data obtained from IWGSC sequence repository hosted by URGI-INRA; Ensembl Genomes release 51 through BioMart: https://plants.ensembl.org/biomart/martview/c061a5fc9e718f7fc4adacb8bf6337fe
! https://urgi.versailles.inra.fr/download/iwgsc/IWGSC_RefSeq_Annotations/v2.1/
! https://plants.ensembl.org/biomart/martview/c061a5fc9e718f7fc4adacb8bf6337fe
! https://plants.ensembl.org/biomart/martview/c061a5fc9e718f7fc4adacb8bf6337fe
! Permission: for not-for-profit lab use only.
!
! URL: https://nrc.canada.ca/en/research-development/research-collaboration/research-centres/digital-technologies-research-centre
! Contact Email: youlian.pan@nrc-cnrc.gc.ca
! Source DB	GeneID_V1.2	GeneID_V2.1	Gene description	GO term accession	GO term name	GO term definition	Gene name	Go-domain
EnsemblPlants Rel 51	TraesCS1A02G003100	TraesCS1A03G0009700		GO:0043531	ADP binding	Interacting selectively and non-covalently with ADP, adenosine 5'-diphosphate.		F
EnsemblPlants Rel 51	TraesCS1A02G003200	TraesCS1A03G0009800		GO:0005525	GTP binding	Interacting selectively and non-covalently with GTP, guanosine triphosphate.		F
EnsemblPlants Rel 51	TraesCS1A02G003400	TraesCS1A03G0010400		GO:0016747	transferase activity, transferring acyl groups other than amino-acyl groups	Catalysis of the transfer of an acyl group, other than amino-acyl, from one compound (donor) to another (acceptor).		F
EnsemblPlants Rel 51	TraesCS1A02G003546	TraesCS1A03G0011000		GO:0043531	ADP binding	Interacting selectively and non-covalently with ADP, adenosine 5'-diphosphate.		F
EnsemblPlants Rel 51	TraesCS1A02G004000	TraesCS1A03G0012700		GO:0043531	ADP binding	Interacting selectively and non-covalently with ADP, adenosine 5'-diphosphate.		F
EnsemblPlants Rel 51	TraesCS1A02G004100	TraesCS1A03G0012900		GO:0043531	ADP binding	Interacting selectively and non-covalently with ADP, adenosine 5'-diphosphate.		F
EnsemblPlants Rel 51	TraesCS1A02G004126	TraesCS1A03G0013000		GO:0043531	ADP binding	Interacting selectively and non-covalently with ADP, adenosine 5'-diphosphate.		F
EnsemblPlants Rel 51	TraesCS1A02G004900	TraesCS1A03G0014500		GO:0005515	protein binding	Interacting selectively and non-covalently with any protein or protein complex (a complex of two or more proteins that may include other nonprotein molecules).		F
EnsemblPlants Rel 51	TraesCS1A02G005100	TraesCS1A03G0014800		GO:0007034	vacuolar transport	The directed movement of substances into, out of or within a vacuole.		P
EnsemblPlants Rel 51	TraesCS1A02G005300	TraesCS1A03G0015100		GO:0005515	protein binding	Interacting selectively and non-covalently with any protein or protein complex (a complex of two or more proteins that may include other nonprotein molecules).		F
EnsemblPlants Rel 51	TraesCS1A02G005400	TraesCS1A03G0015600		GO:0003676	nucleic acid binding	Interacting selectively and non-covalently with any nucleic acid.		F
EnsemblPlants Rel 51	TraesCS1A02G005800	TraesCS1A03G0016300		GO:0003676	nucleic acid binding	Interacting selectively and non-covalently with any nucleic acid.		F
EnsemblPlants Rel 51	TraesCS1A02G005900	TraesCS1A03G0016400		GO:0007034	vacuolar transport	The directed movement of substances into, out of or within a vacuole.		P
EnsemblPlants Rel 51	TraesCS1A02G006400	TraesCS1A03G0017400		GO:0005515	protein binding	Interacting selectively and non-covalently with any protein or protein complex (a complex of two or more proteins that may include other nonprotein molecules).		F
EnsemblPlants Rel 51	TraesCS1A02G006700	TraesCS1A03G0017700		GO:0043531	ADP binding	Interacting selectively and non-covalently with ADP, adenosine 5'-diphosphate.		F
EnsemblPlants Rel 51	TraesCS1A02G007300	TraesCS1A03G0019600		GO:0045735	nutrient reservoir activity	Functions in the storage of nutritious substrates.		F
EnsemblPlants Rel 51	TraesCS1A02G007400	TraesCS1A03G0020400	Gamma gliadin-A3 [Source:UniProtKB/TrEMBL;Acc:B6UKM9]	GO:0045735	nutrient reservoir activity	Functions in the storage of nutritious substrates.		F
EnsemblPlants Rel 51	TraesCS1A02G007405	TraesCS1A03G0020500	Gamma gliadin-A3 [Source:UniProtKB/TrEMBL;Acc:B6UKM9]	GO:0045735	nutrient reservoir activity	Functions in the storage of nutritious substrates.		F
EnsemblPlants Rel 51	TraesCS1A02G007700	TraesCS1A03G0020800		GO:0045735	nutrient reservoir activity	Functions in the storage of nutritious substrates.		F
EnsemblPlants Rel 51	TraesCS1A02G008300	TraesCS1A03G0022300		GO:0043531	ADP binding	Interacting selectively and non-covalently with ADP, adenosine 5'-diphosphate.		F
EnsemblPlants Rel 51	TraesCS1A02G008353	TraesCS1A03G0022500		GO:0043531	ADP binding	Interacting selectively and non-covalently with ADP, adenosine 5'-diphosphate.		F
EnsemblPlants Rel 51	TraesCS1A02G008500	TraesCS1A03G0023600		GO:0016747	transferase activity, transferring acyl groups other than amino-acyl groups	Catalysis of the transfer of an acyl group, other than amino-acyl, from one compound (donor) to another (acceptor).		F
EnsemblPlants Rel 51	TraesCS1A02G008800	TraesCS1A03G0024000	Dirigent protein [Source:UniProtKB/TrEMBL;Acc:A0A1D5S4R4]	GO:0048046	apoplast	The cell membranes and intracellular regions in a plant are connected through plasmodesmata, and plants may be described as having two major compartments: the living symplast and the non-living apoplast. The apoplast is external to the plasma membrane and includes cell walls, intercellular spaces and the lumen of dead structures such as xylem vessels. Water and solutes pass freely through it.		C
EnsemblPlants Rel 51	TraesCS1A02G009000	TraesCS1A03G0024500		GO:0005515	protein binding	Interacting selectively and non-covalently with any protein or protein complex (a complex of two or more proteins that may include other nonprotein molecules).		F
EnsemblPlants Rel 51	TraesCS1A02G009300	TraesCS1A03G0024800		GO:0043531	ADP binding	Interacting selectively and non-covalently with ADP, adenosine 5'-diphosphate.		F
EnsemblPlants Rel 51	TraesCS1A02G009320	TraesCS1A03G0024900		GO:0043531	ADP binding	Interacting selectively and non-covalently with ADP, adenosine 5'-diphosphate.		F
EnsemblPlants Rel 51	TraesCS1A02G010700	TraesCS1A03G0028100		GO:0008168	methyltransferase activity	Catalysis of the transfer of a methyl group to an acceptor molecule.		F
EnsemblPlants Rel 51	TraesCS1A02G011700	TraesCS1A03G0029600		GO:0016021	integral component of membrane	The component of a membrane consisting of the gene products and protein complexes having at least some part of their peptide sequence embedded in the hydrophobic region of the membrane.		C
EnsemblPlants Rel 51	TraesCS1A02G012200	TraesCS1A03G0031000		GO:0007166	cell surface receptor signaling pathway	A series of molecular signals initiated by activation of a receptor on the surface of a cell. The pathway begins with binding of an extracellular ligand to a cell surface receptor, or for receptors that signal in the absence of a ligand, by ligand-withdrawal or the activity of a constitutively active receptor. The pathway ends with regulation of a downstream cellular process, e.g. transcription.		P
EnsemblPlants Rel 51	TraesCS1A02G012400	TraesCS1A03G0031300		GO:0005515	protein binding	Interacting selectively and non-covalently with any protein or protein complex (a complex of two or more proteins that may include other nonprotein molecules).		F
EnsemblPlants Rel 51	TraesCS1A02G012600	TraesCS1A03G0031600		GO:0005515	protein binding	Interacting selectively and non-covalently with any protein or protein complex (a complex of two or more proteins that may include other nonprotein molecules).		F
EnsemblPlants Rel 51	TraesCS1A02G012700	TraesCS1A03G0031900		GO:0003824	catalytic activity	Catalysis of a biochemical reaction at physiological temperatures. In biologically catalyzed reactions, the reactants are known as substrates, and the catalysts are naturally occurring macromolecular substances known as enzymes. Enzymes possess specific binding sites for substrates, and are usually composed wholly or largely of protein, but RNA that has catalytic activity (ribozyme) is often also…		F
EnsemblPlants Rel 51	TraesCS1A02G012800	TraesCS1A03G0032000		GO:0003824	catalytic activity	Catalysis of a biochemical reaction at physiological temperatures. In biologically catalyzed reactions, the reactants are known as substrates, and the catalysts are naturally occurring macromolecular substances known as enzymes. Enzymes possess specific binding sites for substrates, and are usually composed wholly or largely of protein, but RNA that has catalytic activity (ribozyme) is often also…		F
EnsemblPlants Rel 51	TraesCS1A02G012900	TraesCS1A03G0032100		GO:0003824	catalytic activity	Catalysis of a biochemical reaction at physiological temperatures. In biologically catalyzed reactions, the reactants are known as substrates, and the catalysts are naturally occurring macromolecular substances known as enzymes. Enzymes possess specific binding sites for substrates, and are usually composed wholly or largely of protein, but RNA that has catalytic activity (ribozyme) is often also…		F
EnsemblPlants Rel 51	TraesCS1A02G013000	TraesCS1A03G0032200		GO:0043531	ADP binding	Interacting selectively and non-covalently with ADP, adenosine 5'-diphosphate.		F
EnsemblPlants Rel 51	TraesCS1A02G013600	TraesCS1A03G0033600	Defensin [Source:UniProtKB/TrEMBL;Acc:Q8L698]	GO:0006952	defense response	Reactions, triggered in response to the presence of a foreign body or the occurrence of an injury, which result in restriction of damage to the organism attacked or prevention/recovery from the infection caused by the attack.		P
EnsemblPlants Rel 51	TraesCS1A02G014000	TraesCS1A03G0034100	Defensin [Source:UniProtKB/TrEMBL;Acc:W4ZWJ1]	GO:0006952	defense response	Reactions, triggered in response to the presence of a foreign body or the occurrence of an injury, which result in restriction of damage to the organism attacked or prevention/recovery from the infection caused by the attack.		P
EnsemblPlants Rel 51	TraesCS1A02G014100	TraesCS1A03G0034200		GO:0006952	defense response	Reactions, triggered in response to the presence of a foreign body or the occurrence of an injury, which result in restriction of damage to the organism attacked or prevention/recovery from the infection caused by the attack.		P
EnsemblPlants Rel 51	TraesCS1A02G014300	TraesCS1A03G0034600		GO:0016021	integral component of membrane	The component of a membrane consisting of the gene products and protein complexes having at least some part of their peptide sequence embedded in the hydrophobic region of the membrane.		C
EnsemblPlants Rel 51	TraesCS1A02G014800	TraesCS1A03G0035200	Defensin [Source:UniProtKB/TrEMBL;Acc:W4ZXA3]	GO:0006952	defense response	Reactions, triggered in response to the presence of a foreign body or the occurrence of an injury, which result in restriction of damage to the organism attacked or prevention/recovery from the infection caused by the attack.		P
EnsemblPlants Rel 51	TraesCS1A02G016200	TraesCS1A03G0038800		GO:0043531	ADP binding	Interacting selectively and non-covalently with ADP, adenosine 5'-diphosphate.		F
EnsemblPlants Rel 51	TraesCS1A02G016400	TraesCS1A03G0039100		GO:0043531	ADP binding	Interacting selectively and non-covalently with ADP, adenosine 5'-diphosphate.		F
EnsemblPlants Rel 51	TraesCS1A02G017000	TraesCS1A03G0039600		GO:0003676	nucleic acid binding	Interacting selectively and non-covalently with any nucleic acid.		F
EnsemblPlants Rel 51	TraesCS1A02G017500	TraesCS1A03G0040500		GO:0016021	integral component of membrane	The component of a membrane consisting of the gene products and protein complexes having at least some part of their peptide sequence embedded in the hydrophobic region of the membrane.		C
EnsemblPlants Rel 51	TraesCS1A02G017800	TraesCS1A03G0041800		GO:0043531	ADP binding	Interacting selectively and non-covalently with ADP, adenosine 5'-diphosphate.		F
EnsemblPlants Rel 51	TraesCS1A02G018400	TraesCS1A03G0042800		GO:0043531	ADP binding	Interacting selectively and non-covalently with ADP, adenosine 5'-diphosphate.		F
EnsemblPlants Rel 51	TraesCS1A02G018800	TraesCS1A03G0043400		GO:0016021	integral component of membrane	The component of a membrane consisting of the gene products and protein complexes having at least some part of their peptide sequence embedded in the hydrophobic region of the membrane.		C
EnsemblPlants Rel 51	TraesCS1A02G018900	TraesCS1A03G0043500		GO:0003676	nucleic acid binding	Interacting selectively and non-covalently with any nucleic acid.		F
EnsemblPlants Rel 51	TraesCS1A02G019100	TraesCS1A03G0043800		GO:0005515	protein binding	Interacting selectively and non-covalently with any protein or protein complex (a complex of two or more proteins that may include other nonprotein molecules).		F
EnsemblPlants Rel 51	TraesCS1A02G019200	TraesCS1A03G0044000		GO:0005515	protein binding	Interacting selectively and non-covalently with any protein or protein complex (a complex of two or more proteins that may include other nonprotein molecules).		F
EnsemblPlants Rel 51	TraesCS1A02G019400	TraesCS1A03G0044800		GO:0005515	protein binding	Interacting selectively and non-covalently with any protein or protein complex (a complex of two or more proteins that may include other nonprotein molecules).		F
EnsemblPlants Rel 51	TraesCS1A02G019600	TraesCS1A03G0045100		GO:0008194	UDP-glycosyltransferase activity	Catalysis of the transfer of a glycosyl group from a UDP-sugar to a small hydrophobic molecule.		F
EnsemblPlants Rel 51	TraesCS1A02G020000	TraesCS1A03G0045700		GO:0006952	defense response	Reactions, triggered in response to the presence of a foreign body or the occurrence of an injury, which result in restriction of damage to the organism attacked or prevention/recovery from the infection caused by the attack.		P
EnsemblPlants Rel 51	TraesCS1A02G020100	TraesCS1A03G0045800		GO:0006952	defense response	Reactions, triggered in response to the presence of a foreign body or the occurrence of an injury, which result in restriction of damage to the organism attacked or prevention/recovery from the infection caused by the attack.		P
EnsemblPlants Rel 51	TraesCS1A02G020153	TraesCS1A03G0045900		GO:0043531	ADP binding	Interacting selectively and non-covalently with ADP, adenosine 5'-diphosphate.		F
EnsemblPlants Rel 51	TraesCS1A02G020400	TraesCS1A03G0046200	Putative chromosome condensation factor [Source:UniProtKB/TrEMBL;Acc:Q5EWZ0]	GO:0046872	metal ion binding	Interacting selectively and non-covalently with any metal ion.		F
EnsemblPlants Rel 51	TraesCS1A02G021100	TraesCS1A03G0047300		GO:0016747	transferase activity, transferring acyl groups other than amino-acyl groups	Catalysis of the transfer of an acyl group, other than amino-acyl, from one compound (donor) to another (acceptor).		F
EnsemblPlants Rel 51	TraesCS1A02G021700	TraesCS1A03G0048900		GO:0043531	ADP binding	Interacting selectively and non-covalently with ADP, adenosine 5'-diphosphate.		F
EnsemblPlants Rel 51	TraesCS1A02G021800	TraesCS1A03G0049000		GO:0043531	ADP binding	Interacting selectively and non-covalently with ADP, adenosine 5'-diphosphate.		F
EnsemblPlants Rel 51	TraesCS1A02G022400	TraesCS1A03G0050200		GO:0016020	membrane	A lipid bilayer along with all the proteins and protein complexes embedded in it an attached to it.		C
EnsemblPlants Rel 51	TraesCS1A02G022700	TraesCS1A03G0051900		GO:0016021	integral component of membrane	The component of a membrane consisting of the gene products and protein complexes having at least some part of their peptide sequence embedded in the hydrophobic region of the membrane.		C
EnsemblPlants Rel 51	TraesCS1A02G022800	TraesCS1A03G0052000		GO:0016021	integral component of membrane	The component of a membrane consisting of the gene products and protein complexes having at least some part of their peptide sequence embedded in the hydrophobic region of the membrane.		C
EnsemblPlants Rel 51	TraesCS1A02G023100	TraesCS1A03G0052700		GO:0016021	integral component of membrane	The component of a membrane consisting of the gene products and protein complexes having at least some part of their peptide sequence embedded in the hydrophobic region of the membrane.		C
EnsemblPlants Rel 51	TraesCS1A02G023200	TraesCS1A03G0053100	Sulfotransferase [Source:UniProtKB/TrEMBL;Acc:A0A1D5S2Y3]	GO:0008146	sulfotransferase activity	Catalysis of the transfer of a sulfate group from 3'-phosphoadenosine 5'-phosphosulfate to the hydroxyl group of an acceptor, producing the sulfated derivative and 3'-phosphoadenosine 5'-phosphate.		F
EnsemblPlants Rel 51	TraesCS1A02G023205	TraesCS1A03G0053000		GO:0005515	protein binding	Interacting selectively and non-covalently with any protein or protein complex (a complex of two or more proteins that may include other nonprotein molecules).		F
EnsemblPlants Rel 51	TraesCS1A02G023500	TraesCS1A03G0053600		GO:0005515	protein binding	Interacting selectively and non-covalently with any protein or protein complex (a complex of two or more proteins that may include other nonprotein molecules).		F
EnsemblPlants Rel 51	TraesCS1A02G025200	TraesCS1A03G0057600		GO:0016021	integral component of membrane	The component of a membrane consisting of the gene products and protein complexes having at least some part of their peptide sequence embedded in the hydrophobic region of the membrane.		C
EnsemblPlants Rel 51	TraesCS1A02G025500	TraesCS1A03G0058100		GO:0043531	ADP binding	Interacting selectively and non-covalently with ADP, adenosine 5'-diphosphate.		F
EnsemblPlants Rel 51	TraesCS1A02G025700	TraesCS1A03G0059500		GO:0046872	metal ion binding	Interacting selectively and non-covalently with any metal ion.		F
EnsemblPlants Rel 51	TraesCS1A02G026200	TraesCS1A03G0060600		GO:0043531	ADP binding	Interacting selectively and non-covalently with ADP, adenosine 5'-diphosphate.		F
EnsemblPlants Rel 51	TraesCS1A02G026400	TraesCS1A03G0061000		GO:0043531	ADP binding	Interacting selectively and non-covalently with ADP, adenosine 5'-diphosphate.		F
EnsemblPlants Rel 51	TraesCS1A02G027000	TraesCS1A03G0062100		GO:0016021	integral component of membrane	The component of a membrane consisting of the gene products and protein complexes having at least some part of their peptide sequence embedded in the hydrophobic region of the membrane.		C
EnsemblPlants Rel 51	TraesCS1A02G028400	TraesCS1A03G0065000		GO:0043531	ADP binding	Interacting selectively and non-covalently with ADP, adenosine 5'-diphosphate.		F
EnsemblPlants Rel 51	TraesCS1A02G028500	TraesCS1A03G0065300		GO:0043531	ADP binding	Interacting selectively and non-covalently with ADP, adenosine 5'-diphosphate.		F
EnsemblPlants Rel 51	TraesCS1A02G028900	TraesCS1A03G0065900		GO:0043531	ADP binding	Interacting selectively and non-covalently with ADP, adenosine 5'-diphosphate.		F
EnsemblPlants Rel 51	TraesCS1A02G029100	TraesCS1A03G0066200		GO:0043531	ADP binding	Interacting selectively and non-covalently with ADP, adenosine 5'-diphosphate.		F
EnsemblPlants Rel 51	TraesCS1A02G029200	TraesCS1A03G0066300		GO:0003723	RNA binding	Interacting selectively and non-covalently with an RNA molecule or a portion thereof.		F
EnsemblPlants Rel 51	TraesCS1A02G029500	TraesCS1A03G0067100		GO:0016747	transferase activity, transferring acyl groups other than amino-acyl groups	Catalysis of the transfer of an acyl group, other than amino-acyl, from one compound (donor) to another (acceptor).		F
EnsemblPlants Rel 51	TraesCS1A02G029800	TraesCS1A03G0067500		GO:0061630	ubiquitin protein ligase activity	Catalysis of the transfer of ubiquitin to a substrate protein via the reaction X-ubiquitin + S -> X + S-ubiquitin, where X is either an E2 or E3 enzyme, the X-ubiquitin linkage is a thioester bond, and the S-ubiquitin linkage is an amide bond: an isopeptide bond between the C-terminal glycine of ubiquitin and the epsilon-amino group of lysine residues in the substrate or, in the linear extension …		F
EnsemblPlants Rel 51	TraesCS1A02G030400	TraesCS1A03G0068800		GO:0008168	methyltransferase activity	Catalysis of the transfer of a methyl group to an acceptor molecule.		F
EnsemblPlants Rel 51	TraesCS1A02G030600	TraesCS1A03G0069100		GO:0016021	integral component of membrane	The component of a membrane consisting of the gene products and protein complexes having at least some part of their peptide sequence embedded in the hydrophobic region of the membrane.		C
EnsemblPlants Rel 51	TraesCS1A02G031600	TraesCS1A03G0071700		GO:0005515	protein binding	Interacting selectively and non-covalently with any protein or protein complex (a complex of two or more proteins that may include other nonprotein molecules).		F
EnsemblPlants Rel 51	TraesCS1A02G031700	TraesCS1A03G0071800		GO:0005515	protein binding	Interacting selectively and non-covalently with any protein or protein complex (a complex of two or more proteins that may include other nonprotein molecules).		F
EnsemblPlants Rel 51	TraesCS1A02G033000	TraesCS1A03G0073700		GO:0005515	protein binding	Interacting selectively and non-covalently with any protein or protein complex (a complex of two or more proteins that may include other nonprotein molecules).		F
EnsemblPlants Rel 51	TraesCS1A02G033100	TraesCS1A03G0073800		GO:0005515	protein binding	Interacting selectively and non-covalently with any protein or protein complex (a complex of two or more proteins that may include other nonprotein molecules).		F
EnsemblPlants Rel 51	TraesCS1A02G034000	TraesCS1A03G0077600		GO:0016021	integral component of membrane	The component of a membrane consisting of the gene products and protein complexes having at least some part of their peptide sequence embedded in the hydrophobic region of the membrane.		C
EnsemblPlants Rel 51	TraesCS1A02G034200	TraesCS1A03G0078100		GO:0003677	DNA binding	Any molecular function by which a gene product interacts selectively and non-covalently with DNA (deoxyribonucleic acid).		F
EnsemblPlants Rel 51	TraesCS1A02G034800	TraesCS1A03G0080200		GO:0008270	zinc ion binding	Interacting selectively and non-covalently with zinc (Zn) ions.		F
EnsemblPlants Rel 51	TraesCS1A02G035900	TraesCS1A03G0083400		GO:0043531	ADP binding	Interacting selectively and non-covalently with ADP, adenosine 5'-diphosphate.		F
EnsemblPlants Rel 51	TraesCS1A02G036200	TraesCS1A03G0084800	Chalcone-flavonone isomerase family protein [Source:UniProtKB/TrEMBL;Acc:W4ZWP7]	GO:0016872	intramolecular lyase activity	The catalysis of certain rearrangements of a molecule to break or form a ring.		F
EnsemblPlants Rel 51	TraesCS1A02G036400	TraesCS1A03G0085200		GO:0005515	protein binding	Interacting selectively and non-covalently with any protein or protein complex (a complex of two or more proteins that may include other nonprotein molecules).		F
EnsemblPlants Rel 51	TraesCS1A02G036500	TraesCS1A03G0085300		GO:0005515	protein binding	Interacting selectively and non-covalently with any protein or protein complex (a complex of two or more proteins that may include other nonprotein molecules).		F
EnsemblPlants Rel 51	TraesCS1A02G036700	TraesCS1A03G0087100		GO:0055114	oxidation-reduction process	A metabolic process that results in the removal or addition of one or more electrons to or from a substance, with or without the concomitant removal or addition of a proton or protons.		P
EnsemblPlants Rel 51	TraesCS1A02G036800	TraesCS1A03G0087200		GO:0005515	protein binding	Interacting selectively and non-covalently with any protein or protein complex (a complex of two or more proteins that may include other nonprotein molecules).		F
EnsemblPlants Rel 51	TraesCS1A02G037100	TraesCS1A03G0088700		GO:0005515	protein binding	Interacting selectively and non-covalently with any protein or protein complex (a complex of two or more proteins that may include other nonprotein molecules).		F
EnsemblPlants Rel 51	TraesCS1A02G040200	TraesCS1A03G0096200		GO:0003676	nucleic acid binding	Interacting selectively and non-covalently with any nucleic acid.		F
EnsemblPlants Rel 51	TraesCS1A02G040300	TraesCS1A03G0096300		GO:0003676	nucleic acid binding	Interacting selectively and non-covalently with any nucleic acid.		F
EnsemblPlants Rel 51	TraesCS1A02G041100	TraesCS1A03G0098000		GO:0043531	ADP binding	Interacting selectively and non-covalently with ADP, adenosine 5'-diphosphate.		F
EnsemblPlants Rel 51	TraesCS1A02G041700	TraesCS1A03G0099000		GO:0016747	transferase activity, transferring acyl groups other than amino-acyl groups	Catalysis of the transfer of an acyl group, other than amino-acyl, from one compound (donor) to another (acceptor).		F
EnsemblPlants Rel 51	TraesCS1A02G042400	TraesCS1A03G0100800		GO:0030145	manganese ion binding	Interacting selectively and non-covalently with manganese (Mn) ions.		F
EnsemblPlants Rel 51	TraesCS1A02G042700	TraesCS1A03G0101600		GO:0003677	DNA binding	Any molecular function by which a gene product interacts selectively and non-covalently with DNA (deoxyribonucleic acid).		F
EnsemblPlants Rel 51	TraesCS1A02G043100	TraesCS1A03G0103100		GO:0003680	minor groove of adenine-thymine-rich DNA binding	Interacting selectively and non-covalently with the structure formed by the minor groove of adenine-thymine-rich DNA regions. Examples of proteins having this function are AT-rich interaction domain (ARID)-containing proteins.		F
EnsemblPlants Rel 51	TraesCS1A02G043400	TraesCS1A03G0103700		GO:0005515	protein binding	Interacting selectively and non-covalently with any protein or protein complex (a complex of two or more proteins that may include other nonprotein molecules).		F
EnsemblPlants Rel 51	TraesCS1A02G044000	TraesCS1A03G0105600		GO:0005515	protein binding	Interacting selectively and non-covalently with any protein or protein complex (a complex of two or more proteins that may include other nonprotein molecules).		F
EnsemblPlants Rel 51	TraesCS1A02G044500	TraesCS1A03G0106500		GO:0003723	RNA binding	Interacting selectively and non-covalently with an RNA molecule or a portion thereof.		F
EnsemblPlants Rel 51	TraesCS1A02G045100	TraesCS1A03G0107500		GO:0005515	protein binding	Interacting selectively and non-covalently with any protein or protein complex (a complex of two or more proteins that may include other nonprotein molecules).		F
EnsemblPlants Rel 51	TraesCS1A02G045800	TraesCS1A03G0109300		GO:0045735	nutrient reservoir activity	Functions in the storage of nutritious substrates.		F
EnsemblPlants Rel 51	TraesCS1A02G046300	TraesCS1A03G0110900	Nudix hydrolase 9 [Source:Projected from Arabidopsis thaliana (AT3G46200) UniProtKB/Swiss-Prot;Acc:Q8VYR2]	GO:0016787	hydrolase activity	Catalysis of the hydrolysis of various bonds, e.g. C-O, C-N, C-C, phosphoric anhydride bonds, etc. Hydrolase is the systematic name for any enzyme of EC class 3.		F
EnsemblPlants Rel 51	TraesCS1A02G046800	TraesCS1A03G0112200		GO:0003352	regulation of cilium movement	Any process that modulates the rate, frequency, or extent of cilium movement, the directed, self-propelled movement of a cilium.		P
EnsemblPlants Rel 51	TraesCS1A02G047400	TraesCS1A03G0114600		GO:0016021	integral component of membrane	The component of a membrane consisting of the gene products and protein complexes having at least some part of their peptide sequence embedded in the hydrophobic region of the membrane.		C
EnsemblPlants Rel 51	TraesCS1A02G047700	TraesCS1A03G0115000		GO:0008194	UDP-glycosyltransferase activity	Catalysis of the transfer of a glycosyl group from a UDP-sugar to a small hydrophobic molecule.		F
EnsemblPlants Rel 51	TraesCS1A02G048400	TraesCS1A03G0116800		GO:0005515	protein binding	Interacting selectively and non-covalently with any protein or protein complex (a complex of two or more proteins that may include other nonprotein molecules).		F
EnsemblPlants Rel 51	TraesCS1A02G050300	TraesCS1A03G0122000		GO:0005515	protein binding	Interacting selectively and non-covalently with any protein or protein complex (a complex of two or more proteins that may include other nonprotein molecules).		F
EnsemblPlants Rel 51	TraesCS1A02G050600	TraesCS1A03G0122800	Defensin [Source:UniProtKB/TrEMBL;Acc:W4ZVB1]	GO:0006952	defense response	Reactions, triggered in response to the presence of a foreign body or the occurrence of an injury, which result in restriction of damage to the organism attacked or prevention/recovery from the infection caused by the attack.		P
EnsemblPlants Rel 51	TraesCS1A02G050700	TraesCS1A03G0122900	Defensin [Source:UniProtKB/TrEMBL;Acc:W4ZVX9]	GO:0006952	defense response	Reactions, triggered in response to the presence of a foreign body or the occurrence of an injury, which result in restriction of damage to the organism attacked or prevention/recovery from the infection caused by the attack.		P
EnsemblPlants Rel 51	TraesCS1A02G050800	TraesCS1A03G0123300		GO:0006952	defense response	Reactions, triggered in response to the presence of a foreign body or the occurrence of an injury, which result in restriction of damage to the organism attacked or prevention/recovery from the infection caused by the attack.		P
EnsemblPlants Rel 51	TraesCS1A02G050900	TraesCS1A03G0123400	Defensin [Source:UniProtKB/TrEMBL;Acc:A0A060AJ86]	GO:0006952	defense response	Reactions, triggered in response to the presence of a foreign body or the occurrence of an injury, which result in restriction of damage to the organism attacked or prevention/recovery from the infection caused by the attack.		P
EnsemblPlants Rel 51	TraesCS1A02G051400	TraesCS1A03G0125200		GO:0003779	actin binding	Interacting selectively and non-covalently with monomeric or multimeric forms of actin, including actin filaments.		F
EnsemblPlants Rel 51	TraesCS1A02G051600	TraesCS1A03G0127300		GO:0005515	protein binding	Interacting selectively and non-covalently with any protein or protein complex (a complex of two or more proteins that may include other nonprotein molecules).		F
EnsemblPlants Rel 51	TraesCS1A02G052300	TraesCS1A03G0129100		GO:0016788	hydrolase activity, acting on ester bonds	Catalysis of the hydrolysis of any ester bond.		F
EnsemblPlants Rel 51	TraesCS1A02G052600	TraesCS1A03G0129800		GO:0030145	manganese ion binding	Interacting selectively and non-covalently with manganese (Mn) ions.		F
EnsemblPlants Rel 51	TraesCS1A02G052700	TraesCS1A03G0129900		GO:0030145	manganese ion binding	Interacting selectively and non-covalently with manganese (Mn) ions.		F
EnsemblPlants Rel 51	TraesCS1A02G053100	TraesCS1A03G0130400		GO:0030145	manganese ion binding	Interacting selectively and non-covalently with manganese (Mn) ions.		F
EnsemblPlants Rel 51	TraesCS1A02G053400	TraesCS1A03G0133100		GO:0005515	protein binding	Interacting selectively and non-covalently with any protein or protein complex (a complex of two or more proteins that may include other nonprotein molecules).		F
EnsemblPlants Rel 51	TraesCS1A02G053600	TraesCS1A03G0133400		GO:0005515	protein binding	Interacting selectively and non-covalently with any protein or protein complex (a complex of two or more proteins that may include other nonprotein molecules).		F
EnsemblPlants Rel 51	TraesCS1A02G053700	TraesCS1A03G0133500		GO:0008641	ubiquitin-like modifier activating enzyme activity	Catalysis of the activation of small proteins, such as ubiquitin or ubiquitin-like proteins, through the formation of an ATP-dependent high-energy thiolester bond.		F
EnsemblPlants Rel 51	TraesCS1A02G054300	TraesCS1A03G0134700		GO:0031011	Ino80 complex	A multisubunit protein complex that contains the Ino80p ATPase; exhibits chromatin remodeling activity and 3' to 5' DNA helicase activity.		C
EnsemblPlants Rel 51	TraesCS1A02G054500	TraesCS1A03G0135000		GO:0005515	protein binding	Interacting selectively and non-covalently with any protein or protein complex (a complex of two or more proteins that may include other nonprotein molecules).		F
EnsemblPlants Rel 51	TraesCS1A02G054700	TraesCS1A03G0135200		GO:0005515	protein binding	Interacting selectively and non-covalently with any protein or protein complex (a complex of two or more proteins that may include other nonprotein molecules).		F
EnsemblPlants Rel 51	TraesCS1A02G054800	TraesCS1A03G0135300		GO:0005515	protein binding	Interacting selectively and non-covalently with any protein or protein complex (a complex of two or more proteins that may include other nonprotein molecules).		F
EnsemblPlants Rel 51	TraesCS1A02G055000	TraesCS1A03G0135600	Thylakoid membrane protein TERC, chloroplastic [Source:Projected from Arabidopsis thaliana (AT5G12130) UniProtKB/Swiss-Prot;Acc:F4JZG9]	GO:0016021	integral component of membrane	The component of a membrane consisting of the gene products and protein complexes having at least some part of their peptide sequence embedded in the hydrophobic region of the membrane.		C
EnsemblPlants Rel 51	TraesCS1A02G055500	TraesCS1A03G0136500		GO:0005515	protein binding	Interacting selectively and non-covalently with any protein or protein complex (a complex of two or more proteins that may include other nonprotein molecules).		F
EnsemblPlants Rel 51	TraesCS1A02G055600	TraesCS1A03G0136600		GO:0005515	protein binding	Interacting selectively and non-covalently with any protein or protein complex (a complex of two or more proteins that may include other nonprotein molecules).		F
EnsemblPlants Rel 51	TraesCS1A02G055800	TraesCS1A03G0136900		GO:0005515	protein binding	Interacting selectively and non-covalently with any protein or protein complex (a complex of two or more proteins that may include other nonprotein molecules).		F
EnsemblPlants Rel 51	TraesCS1A02G056000	TraesCS1A03G0137200		GO:0005515	protein binding	Interacting selectively and non-covalently with any protein or protein complex (a complex of two or more proteins that may include other nonprotein molecules).		F
EnsemblPlants Rel 51	TraesCS1A02G056105	TraesCS1A03G0137400		GO:0005515	protein binding	Interacting selectively and non-covalently with any protein or protein complex (a complex of two or more proteins that may include other nonprotein molecules).		F
EnsemblPlants Rel 51	TraesCS1A02G056500	TraesCS1A03G0138200		GO:0005515	protein binding	Interacting selectively and non-covalently with any protein or protein complex (a complex of two or more proteins that may include other nonprotein molecules).		F
EnsemblPlants Rel 51	TraesCS1A02G057100	TraesCS1A03G0139400		GO:0005515	protein binding	Interacting selectively and non-covalently with any protein or protein complex (a complex of two or more proteins that may include other nonprotein molecules).		F
EnsemblPlants Rel 51	TraesCS1A02G057300	TraesCS1A03G0139600		GO:0005515	protein binding	Interacting selectively and non-covalently with any protein or protein complex (a complex of two or more proteins that may include other nonprotein molecules).		F
EnsemblPlants Rel 51	TraesCS1A02G057400	TraesCS1A03G0139800		GO:0005515	protein binding	Interacting selectively and non-covalently with any protein or protein complex (a complex of two or more proteins that may include other nonprotein molecules).		F
EnsemblPlants Rel 51	TraesCS1A02G057600	TraesCS1A03G0140000		GO:0016021	integral component of membrane	The component of a membrane consisting of the gene products and protein complexes having at least some part of their peptide sequence embedded in the hydrophobic region of the membrane.		C
EnsemblPlants Rel 51	TraesCS1A02G057800	TraesCS1A03G0140600		GO:0005515	protein binding	Interacting selectively and non-covalently with any protein or protein complex (a complex of two or more proteins that may include other nonprotein molecules).		F
EnsemblPlants Rel 51	TraesCS1A02G058700	TraesCS1A03G0142300		GO:0016021	integral component of membrane	The component of a membrane consisting of the gene products and protein complexes having at least some part of their peptide sequence embedded in the hydrophobic region of the membrane.		C
EnsemblPlants Rel 51	TraesCS1A02G059500	TraesCS1A03G0144700		GO:0004842	ubiquitin-protein transferase activity	Catalysis of the transfer of ubiquitin from one protein to another via the reaction X-Ub + Y --> Y-Ub + X, where both X-Ub and Y-Ub are covalent linkages.		F
EnsemblPlants Rel 51	TraesCS1A02G060200	TraesCS1A03G0146100		GO:0003676	nucleic acid binding	Interacting selectively and non-covalently with any nucleic acid.		F
EnsemblPlants Rel 51	TraesCS1A02G060500	TraesCS1A03G0146700		GO:0005515	protein binding	Interacting selectively and non-covalently with any protein or protein complex (a complex of two or more proteins that may include other nonprotein molecules).		F
EnsemblPlants Rel 51	TraesCS1A02G061600	TraesCS1A03G0148700		GO:0008194	UDP-glycosyltransferase activity	Catalysis of the transfer of a glycosyl group from a UDP-sugar to a small hydrophobic molecule.		F
EnsemblPlants Rel 51	TraesCS1A02G062100	TraesCS1A03G0150700		GO:0016021	integral component of membrane	The component of a membrane consisting of the gene products and protein complexes having at least some part of their peptide sequence embedded in the hydrophobic region of the membrane.		C
EnsemblPlants Rel 51	TraesCS1A02G063300	TraesCS1A03G0153700		GO:0005515	protein binding	Interacting selectively and non-covalently with any protein or protein complex (a complex of two or more proteins that may include other nonprotein molecules).		F
EnsemblPlants Rel 51	TraesCS1A02G063400	TraesCS1A03G0153800		GO:0005515	protein binding	Interacting selectively and non-covalently with any protein or protein complex (a complex of two or more proteins that may include other nonprotein molecules).		F
EnsemblPlants Rel 51	TraesCS1A02G063500	TraesCS1A03G0154200		GO:0008270	zinc ion binding	Interacting selectively and non-covalently with zinc (Zn) ions.		F
EnsemblPlants Rel 51	TraesCS1A02G063600	TraesCS1A03G0154300	Ubiquitin-conjugating enzyme 37 [Source:Projected from Arabidopsis thaliana (AT3G24515) UniProtKB/TrEMBL;Acc:A0A1I9LLL0]	GO:0016740	transferase activity	Catalysis of the transfer of a group, e.g. a methyl group, glycosyl group, acyl group, phosphorus-containing, or other groups, from one compound (generally regarded as the donor) to another compound (generally regarded as the acceptor). Transferase is the systematic name for any enzyme of EC class 2.		F
EnsemblPlants Rel 51	TraesCS1A02G064100	TraesCS1A03G0156300		GO:0005515	protein binding	Interacting selectively and non-covalently with any protein or protein complex (a complex of two or more proteins that may include other nonprotein molecules).		F
EnsemblPlants Rel 51	TraesCS1A02G064600	TraesCS1A03G0157900		GO:0003676	nucleic acid binding	Interacting selectively and non-covalently with any nucleic acid.		F
EnsemblPlants Rel 51	TraesCS1A02G065000	TraesCS1A03G0159000		GO:0006606	protein import into nucleus	The directed movement of a protein from the cytoplasm to the nucleus.		P
EnsemblPlants Rel 51	TraesCS1A02G065300	TraesCS1A03G0160100		GO:0005515	protein binding	Interacting selectively and non-covalently with any protein or protein complex (a complex of two or more proteins that may include other nonprotein molecules).		F
EnsemblPlants Rel 51	TraesCS1A02G066000	TraesCS1A03G0162400		GO:0005634	nucleus	A membrane-bounded organelle of eukaryotic cells in which chromosomes are housed and replicated. In most cells, the nucleus contains all of the cell's chromosomes except the organellar chromosomes, and is the site of RNA synthesis and processing. In some species, or in specialized cell types, RNA metabolism or DNA replication may be absent.		C
EnsemblPlants Rel 51	TraesCS1A02G066100	TraesCS1A03G0162500		GO:0045735	nutrient reservoir activity	Functions in the storage of nutritious substrates.		F
EnsemblPlants Rel 51	TraesCS1A02G066500	TraesCS1A03G0163500		GO:0005515	protein binding	Interacting selectively and non-covalently with any protein or protein complex (a complex of two or more proteins that may include other nonprotein molecules).		F
EnsemblPlants Rel 51	TraesCS1A02G066521	TraesCS1A03G0163600		GO:0005515	protein binding	Interacting selectively and non-covalently with any protein or protein complex (a complex of two or more proteins that may include other nonprotein molecules).		F
EnsemblPlants Rel 51	TraesCS1A02G066600	TraesCS1A03G0163800		GO:0005515	protein binding	Interacting selectively and non-covalently with any protein or protein complex (a complex of two or more proteins that may include other nonprotein molecules).		F
EnsemblPlants Rel 51	TraesCS1A02G067000	TraesCS1A03G0164600		GO:0005515	protein binding	Interacting selectively and non-covalently with any protein or protein complex (a complex of two or more proteins that may include other nonprotein molecules).		F
EnsemblPlants Rel 51	TraesCS1A02G067400	TraesCS1A03G0165100		GO:0005515	protein binding	Interacting selectively and non-covalently with any protein or protein complex (a complex of two or more proteins that may include other nonprotein molecules).		F
EnsemblPlants Rel 51	TraesCS1A02G067462	TraesCS1A03G0165200		GO:0005515	protein binding	Interacting selectively and non-covalently with any protein or protein complex (a complex of two or more proteins that may include other nonprotein molecules).		F
EnsemblPlants Rel 51	TraesCS1A02G067472	TraesCS1A03G0165300		GO:0005515	protein binding	Interacting selectively and non-covalently with any protein or protein complex (a complex of two or more proteins that may include other nonprotein molecules).		F
EnsemblPlants Rel 51	TraesCS1A02G067500	TraesCS1A03G0165400		GO:0005515	protein binding	Interacting selectively and non-covalently with any protein or protein complex (a complex of two or more proteins that may include other nonprotein molecules).		F
EnsemblPlants Rel 51	TraesCS1A02G067600	TraesCS1A03G0165900		GO:0005515	protein binding	Interacting selectively and non-covalently with any protein or protein complex (a complex of two or more proteins that may include other nonprotein molecules).		F
EnsemblPlants Rel 51	TraesCS1A02G067700	TraesCS1A03G0166000		GO:0005515	protein binding	Interacting selectively and non-covalently with any protein or protein complex (a complex of two or more proteins that may include other nonprotein molecules).		F
EnsemblPlants Rel 51	TraesCS1A02G067800	TraesCS1A03G0166100		GO:0005515	protein binding	Interacting selectively and non-covalently with any protein or protein complex (a complex of two or more proteins that may include other nonprotein molecules).		F
EnsemblPlants Rel 51	TraesCS1A02G068900	TraesCS1A03G0168600		GO:0016021	integral component of membrane	The component of a membrane consisting of the gene products and protein complexes having at least some part of their peptide sequence embedded in the hydrophobic region of the membrane.		C
EnsemblPlants Rel 51	TraesCS1A02G069400	TraesCS1A03G0170500	At5g52210 [Source:Projected from Arabidopsis thaliana (AT5G52210) UniProtKB/TrEMBL;Acc:Q38921]	GO:0005525	GTP binding	Interacting selectively and non-covalently with GTP, guanosine triphosphate.		F
EnsemblPlants Rel 51	TraesCS1A02G069800	TraesCS1A03G0171000		GO:0005515	protein binding	Interacting selectively and non-covalently with any protein or protein complex (a complex of two or more proteins that may include other nonprotein molecules).		F
EnsemblPlants Rel 51	TraesCS1A02G069900	TraesCS1A03G0171300		GO:0016021	integral component of membrane	The component of a membrane consisting of the gene products and protein complexes having at least some part of their peptide sequence embedded in the hydrophobic region of the membrane.		C
EnsemblPlants Rel 51	TraesCS1A02G070700	TraesCS1A03G0172800		GO:0005515	protein binding	Interacting selectively and non-covalently with any protein or protein complex (a complex of two or more proteins that may include other nonprotein molecules).		F
EnsemblPlants Rel 51	TraesCS1A02G070800	TraesCS1A03G0173200		GO:0005515	protein binding	Interacting selectively and non-covalently with any protein or protein complex (a complex of two or more proteins that may include other nonprotein molecules).		F
EnsemblPlants Rel 51	TraesCS1A02G071000	TraesCS1A03G0173700		GO:0005515	protein binding	Interacting selectively and non-covalently with any protein or protein complex (a complex of two or more proteins that may include other nonprotein molecules).		F
EnsemblPlants Rel 51	TraesCS1A02G071100	TraesCS1A03G0174000		GO:0003677	DNA binding	Any molecular function by which a gene product interacts selectively and non-covalently with DNA (deoxyribonucleic acid).		F
EnsemblPlants Rel 51	TraesCS1A02G072400	TraesCS1A03G0177300		GO:0005515	protein binding	Interacting selectively and non-covalently with any protein or protein complex (a complex of two or more proteins that may include other nonprotein molecules).		F
EnsemblPlants Rel 51	TraesCS1A02G072900	TraesCS1A03G0177800		GO:0005515	protein binding	Interacting selectively and non-covalently with any protein or protein complex (a complex of two or more proteins that may include other nonprotein molecules).		F
EnsemblPlants Rel 51	TraesCS1A02G072982	TraesCS1A03G0178200		GO:0005515	protein binding	Interacting selectively and non-covalently with any protein or protein complex (a complex of two or more proteins that may include other nonprotein molecules).		F
EnsemblPlants Rel 51	TraesCS1A02G072986	TraesCS1A03G0178300		GO:0005515	protein binding	Interacting selectively and non-covalently with any protein or protein complex (a complex of two or more proteins that may include other nonprotein molecules).		F
EnsemblPlants Rel 51	TraesCS1A02G073100	TraesCS1A03G0178500		GO:0016021	integral component of membrane	The component of a membrane consisting of the gene products and protein complexes having at least some part of their peptide sequence embedded in the hydrophobic region of the membrane.		C
EnsemblPlants Rel 51	TraesCS1A02G073400	TraesCS1A03G0179100	TPR5 [Source:Projected from Arabidopsis thaliana (AT1G56440) UniProtKB/TrEMBL;Acc:A0A178WG02]	GO:0005515	protein binding	Interacting selectively and non-covalently with any protein or protein complex (a complex of two or more proteins that may include other nonprotein molecules).		F
EnsemblPlants Rel 51	TraesCS1A02G073500	TraesCS1A03G0179400		GO:0016021	integral component of membrane	The component of a membrane consisting of the gene products and protein complexes having at least some part of their peptide sequence embedded in the hydrophobic region of the membrane.		C
EnsemblPlants Rel 51	TraesCS1A02G073600	TraesCS1A03G0179500		GO:0005515	protein binding	Interacting selectively and non-covalently with any protein or protein complex (a complex of two or more proteins that may include other nonprotein molecules).		F
EnsemblPlants Rel 51	TraesCS1A02G073700	TraesCS1A03G0179600		GO:0005515	protein binding	Interacting selectively and non-covalently with any protein or protein complex (a complex of two or more proteins that may include other nonprotein molecules).		F
EnsemblPlants Rel 51	TraesCS1A02G073800	TraesCS1A03G0179700		GO:0005515	protein binding	Interacting selectively and non-covalently with any protein or protein complex (a complex of two or more proteins that may include other nonprotein molecules).		F
EnsemblPlants Rel 51	TraesCS1A02G074000	TraesCS1A03G0179900		GO:0005515	protein binding	Interacting selectively and non-covalently with any protein or protein complex (a complex of two or more proteins that may include other nonprotein molecules).		F
EnsemblPlants Rel 51	TraesCS1A02G074100	TraesCS1A03G0180000		GO:0009734	auxin-activated signaling pathway	A series of molecular signals generated by the binding of the plant hormone auxin to a receptor, and ending with modulation of a downstream cellular process, e.g. transcription.		P
EnsemblPlants Rel 51	TraesCS1A02G074200	TraesCS1A03G0180100		GO:0005515	protein binding	Interacting selectively and non-covalently with any protein or protein complex (a complex of two or more proteins that may include other nonprotein molecules).		F
EnsemblPlants Rel 51	TraesCS1A02G074300	TraesCS1A03G0180200		GO:0005515	protein binding	Interacting selectively and non-covalently with any protein or protein complex (a complex of two or more proteins that may include other nonprotein molecules).		F
EnsemblPlants Rel 51	TraesCS1A02G074400	TraesCS1A03G0180300		GO:0003676	nucleic acid binding	Interacting selectively and non-covalently with any nucleic acid.		F
EnsemblPlants Rel 51	TraesCS1A02G074800	TraesCS1A03G0181200		GO:0016021	integral component of membrane	The component of a membrane consisting of the gene products and protein complexes having at least some part of their peptide sequence embedded in the hydrophobic region of the membrane.		C
EnsemblPlants Rel 51	TraesCS1A02G074900	TraesCS1A03G0181500		GO:0005515	protein binding	Interacting selectively and non-covalently with any protein or protein complex (a complex of two or more proteins that may include other nonprotein molecules).		F
EnsemblPlants Rel 51	TraesCS1A02G075000	TraesCS1A03G0181600		GO:0003824	catalytic activity	Catalysis of a biochemical reaction at physiological temperatures. In biologically catalyzed reactions, the reactants are known as substrates, and the catalysts are naturally occurring macromolecular substances known as enzymes. Enzymes possess specific binding sites for substrates, and are usually composed wholly or largely of protein, but RNA that has catalytic activity (ribozyme) is often also…		F
EnsemblPlants Rel 51	TraesCS1A02G075300	TraesCS1A03G0183700		GO:0005515	protein binding	Interacting selectively and non-covalently with any protein or protein complex (a complex of two or more proteins that may include other nonprotein molecules).		F
EnsemblPlants Rel 51	TraesCS1A02G075400	TraesCS1A03G0184800		GO:0005515	protein binding	Interacting selectively and non-covalently with any protein or protein complex (a complex of two or more proteins that may include other nonprotein molecules).		F
EnsemblPlants Rel 51	TraesCS1A02G076200	TraesCS1A03G0186100		GO:0003677	DNA binding	Any molecular function by which a gene product interacts selectively and non-covalently with DNA (deoxyribonucleic acid).		F
EnsemblPlants Rel 51	TraesCS1A02G076500	TraesCS1A03G0186700		GO:0043531	ADP binding	Interacting selectively and non-covalently with ADP, adenosine 5'-diphosphate.		F
EnsemblPlants Rel 51	TraesCS1A02G077000	TraesCS1A03G0187900		GO:0016788	hydrolase activity, acting on ester bonds	Catalysis of the hydrolysis of any ester bond.		F
EnsemblPlants Rel 51	TraesCS1A02G077800	TraesCS1A03G0190200		GO:0016021	integral component of membrane	The component of a membrane consisting of the gene products and protein complexes having at least some part of their peptide sequence embedded in the hydrophobic region of the membrane.		C
EnsemblPlants Rel 51	TraesCS1A02G078500	TraesCS1A03G0191900		GO:0005515	protein binding	Interacting selectively and non-covalently with any protein or protein complex (a complex of two or more proteins that may include other nonprotein molecules).		F
EnsemblPlants Rel 51	TraesCS1A02G078700	TraesCS1A03G0192800		GO:0016021	integral component of membrane	The component of a membrane consisting of the gene products and protein complexes having at least some part of their peptide sequence embedded in the hydrophobic region of the membrane.		C
EnsemblPlants Rel 51	TraesCS1A02G079300	TraesCS1A03G0193500		GO:0046983	protein dimerization activity	The formation of a protein dimer, a macromolecular structure consists of two noncovalently associated identical or nonidentical subunits.		F
EnsemblPlants Rel 51	TraesCS1A02G079800	TraesCS1A03G0194000		GO:0005635	nuclear envelope	The double lipid bilayer enclosing the nucleus and separating its contents from the rest of the cytoplasm; includes the intermembrane space, a gap of width 20-40 nm (also called the perinuclear space).		C
EnsemblPlants Rel 51	TraesCS1A02G080000	TraesCS1A03G0194500		GO:0030145	manganese ion binding	Interacting selectively and non-covalently with manganese (Mn) ions.		F
EnsemblPlants Rel 51	TraesCS1A02G080400	TraesCS1A03G0194900		GO:0005515	protein binding	Interacting selectively and non-covalently with any protein or protein complex (a complex of two or more proteins that may include other nonprotein molecules).		F
EnsemblPlants Rel 51	TraesCS1A02G081200	TraesCS1A03G0197100		GO:0016747	transferase activity, transferring acyl groups other than amino-acyl groups	Catalysis of the transfer of an acyl group, other than amino-acyl, from one compound (donor) to another (acceptor).		F
EnsemblPlants Rel 51	TraesCS1A02G081600	TraesCS1A03G0198400		GO:0016021	integral component of membrane	The component of a membrane consisting of the gene products and protein complexes having at least some part of their peptide sequence embedded in the hydrophobic region of the membrane.		C
EnsemblPlants Rel 51	TraesCS1A02G081700	TraesCS1A03G0198500		GO:0016021	integral component of membrane	The component of a membrane consisting of the gene products and protein complexes having at least some part of their peptide sequence embedded in the hydrophobic region of the membrane.		C
EnsemblPlants Rel 51	TraesCS1A02G082100	TraesCS1A03G0200300		GO:0016021	integral component of membrane	The component of a membrane consisting of the gene products and protein complexes having at least some part of their peptide sequence embedded in the hydrophobic region of the membrane.		C
EnsemblPlants Rel 51	TraesCS1A02G084000	TraesCS1A03G0204700		GO:0016747	transferase activity, transferring acyl groups other than amino-acyl groups	Catalysis of the transfer of an acyl group, other than amino-acyl, from one compound (donor) to another (acceptor).		F
EnsemblPlants Rel 51	TraesCS1A02G084500	TraesCS1A03G0205300		GO:0003824	catalytic activity	Catalysis of a biochemical reaction at physiological temperatures. In biologically catalyzed reactions, the reactants are known as substrates, and the catalysts are naturally occurring macromolecular substances known as enzymes. Enzymes possess specific binding sites for substrates, and are usually composed wholly or largely of protein, but RNA that has catalytic activity (ribozyme) is often also…		F
EnsemblPlants Rel 51	TraesCS1A02G085500	TraesCS1A03G0207500		GO:0008080	N-acetyltransferase activity	Catalysis of the transfer of an acetyl group to a nitrogen atom on the acceptor molecule.		F
EnsemblPlants Rel 51	TraesCS1A02G085700	TraesCS1A03G0207700		GO:0005515	protein binding	Interacting selectively and non-covalently with any protein or protein complex (a complex of two or more proteins that may include other nonprotein molecules).		F
EnsemblPlants Rel 51	TraesCS1A02G085900	TraesCS1A03G0208000		GO:0005515	protein binding	Interacting selectively and non-covalently with any protein or protein complex (a complex of two or more proteins that may include other nonprotein molecules).		F
EnsemblPlants Rel 51	TraesCS1A02G086800	TraesCS1A03G0210600		GO:0005515	protein binding	Interacting selectively and non-covalently with any protein or protein complex (a complex of two or more proteins that may include other nonprotein molecules).		F
EnsemblPlants Rel 51	TraesCS1A02G086900	TraesCS1A03G0210700		GO:0016021	integral component of membrane	The component of a membrane consisting of the gene products and protein complexes having at least some part of their peptide sequence embedded in the hydrophobic region of the membrane.		C
EnsemblPlants Rel 51	TraesCS1A02G087100	TraesCS1A03G0211100		GO:0016021	integral component of membrane	The component of a membrane consisting of the gene products and protein complexes having at least some part of their peptide sequence embedded in the hydrophobic region of the membrane.		C
EnsemblPlants Rel 51	TraesCS1A02G087700	TraesCS1A03G0212800		GO:0003677	DNA binding	Any molecular function by which a gene product interacts selectively and non-covalently with DNA (deoxyribonucleic acid).		F
EnsemblPlants Rel 51	TraesCS1A02G088100	TraesCS1A03G0214000	Zinc finger, RING/FYVE/PHD-type domain containing protein [Source: Projected from Oryza sativa (Os07g0446100)]	GO:0005515	protein binding	Interacting selectively and non-covalently with any protein or protein complex (a complex of two or more proteins that may include other nonprotein molecules).		F
EnsemblPlants Rel 51	TraesCS1A02G088300	TraesCS1A03G0214400		GO:0016747	transferase activity, transferring acyl groups other than amino-acyl groups	Catalysis of the transfer of an acyl group, other than amino-acyl, from one compound (donor) to another (acceptor).		F
EnsemblPlants Rel 51	TraesCS1A02G088400	TraesCS1A03G0214500		GO:0016747	transferase activity, transferring acyl groups other than amino-acyl groups	Catalysis of the transfer of an acyl group, other than amino-acyl, from one compound (donor) to another (acceptor).		F
EnsemblPlants Rel 51	TraesCS1A02G089700	TraesCS1A03G0217800		GO:0003676	nucleic acid binding	Interacting selectively and non-covalently with any nucleic acid.		F
EnsemblPlants Rel 51	TraesCS1A02G090300	TraesCS1A03G0218600	AtAPC7 [Source:Projected from Arabidopsis thaliana (AT2G39090) UniProtKB/TrEMBL;Acc:A0A178VSZ9]	GO:0005515	protein binding	Interacting selectively and non-covalently with any protein or protein complex (a complex of two or more proteins that may include other nonprotein molecules).		F
EnsemblPlants Rel 51	TraesCS1A02G090600	TraesCS1A03G0219300	Pyridoxal phosphate homeostasis protein [Source:UniProtKB/TrEMBL;Acc:A0A1D5S534]	GO:0030170	pyridoxal phosphate binding	Interacting selectively and non-covalently with pyridoxal 5' phosphate, 3-hydroxy-5-(hydroxymethyl)-2-methyl4-pyridine carboxaldehyde 5' phosphate, the biologically active form of vitamin B6.		F
EnsemblPlants Rel 51	TraesCS1A02G090700	TraesCS1A03G0219400		GO:0016021	integral component of membrane	The component of a membrane consisting of the gene products and protein complexes having at least some part of their peptide sequence embedded in the hydrophobic region of the membrane.		C
EnsemblPlants Rel 51	TraesCS1A02G091200	TraesCS1A03G0221000		GO:0003723	RNA binding	Interacting selectively and non-covalently with an RNA molecule or a portion thereof.		F
EnsemblPlants Rel 51	TraesCS1A02G091300	TraesCS1A03G0221400		GO:0005515	protein binding	Interacting selectively and non-covalently with any protein or protein complex (a complex of two or more proteins that may include other nonprotein molecules).		F
EnsemblPlants Rel 51	TraesCS1A02G091700	TraesCS1A03G0222400		GO:0005515	protein binding	Interacting selectively and non-covalently with any protein or protein complex (a complex of two or more proteins that may include other nonprotein molecules).		F
EnsemblPlants Rel 51	TraesCS1A02G092600	TraesCS1A03G0224000		GO:0005615	extracellular space	That part of a multicellular organism outside the cells proper, usually taken to be outside the plasma membranes, and occupied by fluid.		C
EnsemblPlants Rel 51	TraesCS1A02G093100	TraesCS1A03G0225000		GO:0005515	protein binding	Interacting selectively and non-covalently with any protein or protein complex (a complex of two or more proteins that may include other nonprotein molecules).		F
EnsemblPlants Rel 51	TraesCS1A02G093500	TraesCS1A03G0226300		GO:0005515	protein binding	Interacting selectively and non-covalently with any protein or protein complex (a complex of two or more proteins that may include other nonprotein molecules).		F
EnsemblPlants Rel 51	TraesCS1A02G093700	TraesCS1A03G0227000		GO:0005515	protein binding	Interacting selectively and non-covalently with any protein or protein complex (a complex of two or more proteins that may include other nonprotein molecules).		F
EnsemblPlants Rel 51	TraesCS1A02G094000	TraesCS1A03G0227400		GO:0016020	membrane	A lipid bilayer along with all the proteins and protein complexes embedded in it an attached to it.		C
EnsemblPlants Rel 51	TraesCS1A02G094500	TraesCS1A03G0229000		GO:0031047	gene silencing by RNA	Any process in which RNA molecules inactivate expression of target genes.		P
EnsemblPlants Rel 51	TraesCS1A02G094800	TraesCS1A03G0229800		GO:0005515	protein binding	Interacting selectively and non-covalently with any protein or protein complex (a complex of two or more proteins that may include other nonprotein molecules).		F
EnsemblPlants Rel 51	TraesCS1A02G096800	TraesCS1A03G0233100		GO:0003677	DNA binding	Any molecular function by which a gene product interacts selectively and non-covalently with DNA (deoxyribonucleic acid).		F
EnsemblPlants Rel 51	TraesCS1A02G097000	TraesCS1A03G0233400		GO:0009767	photosynthetic electron transport chain	A process, occurring as part of photosynthesis, in which light provides the energy for a series of electron carriers to operate together to transfer electrons and generate a transmembrane electrochemical gradient.		P
EnsemblPlants Rel 51	TraesCS1A02G097500	TraesCS1A03G0234400		GO:0016021	integral component of membrane	The component of a membrane consisting of the gene products and protein complexes having at least some part of their peptide sequence embedded in the hydrophobic region of the membrane.		C
EnsemblPlants Rel 51	TraesCS1A02G099000	TraesCS1A03G0241000		GO:0016021	integral component of membrane	The component of a membrane consisting of the gene products and protein complexes having at least some part of their peptide sequence embedded in the hydrophobic region of the membrane.		C
EnsemblPlants Rel 51	TraesCS1A02G099700	TraesCS1A03G0242800		GO:0005515	protein binding	Interacting selectively and non-covalently with any protein or protein complex (a complex of two or more proteins that may include other nonprotein molecules).		F
EnsemblPlants Rel 51	TraesCS1A02G099900	TraesCS1A03G0243300		GO:0005515	protein binding	Interacting selectively and non-covalently with any protein or protein complex (a complex of two or more proteins that may include other nonprotein molecules).		F
EnsemblPlants Rel 51	TraesCS1A02G100100	TraesCS1A03G0243500		GO:0016787	hydrolase activity	Catalysis of the hydrolysis of various bonds, e.g. C-O, C-N, C-C, phosphoric anhydride bonds, etc. Hydrolase is the systematic name for any enzyme of EC class 3.		F
EnsemblPlants Rel 51	TraesCS1A02G100500	TraesCS1A03G0244300	Pentatricopeptide repeat-containing protein At3g05340 [Source:Projected from Arabidopsis thaliana (AT3G05340) UniProtKB/Swiss-Prot;Acc:Q9MA85]	GO:0005515	protein binding	Interacting selectively and non-covalently with any protein or protein complex (a complex of two or more proteins that may include other nonprotein molecules).		F
EnsemblPlants Rel 51	TraesCS1A02G101100	TraesCS1A03G0245700		GO:0005515	protein binding	Interacting selectively and non-covalently with any protein or protein complex (a complex of two or more proteins that may include other nonprotein molecules).		F
EnsemblPlants Rel 51	TraesCS1A02G101300	TraesCS1A03G0245900		GO:0043531	ADP binding	Interacting selectively and non-covalently with ADP, adenosine 5'-diphosphate.		F
EnsemblPlants Rel 51	TraesCS1A02G101700	TraesCS1A03G0246700		GO:0043531	ADP binding	Interacting selectively and non-covalently with ADP, adenosine 5'-diphosphate.		F
EnsemblPlants Rel 51	TraesCS1A02G102100	TraesCS1A03G0247300		GO:0016021	integral component of membrane	The component of a membrane consisting of the gene products and protein complexes having at least some part of their peptide sequence embedded in the hydrophobic region of the membrane.		C
EnsemblPlants Rel 51	TraesCS1A02G102200	TraesCS1A03G0247600		GO:0000911	cytokinesis by cell plate formation	The process of dividing the cytoplasm of a parent cell where a structure forms in the cytoplasm and grows until reaching the plasma membrane, thereby completely separating the cytoplasms of adjacent progeny cells. An example of this is found in Arabidopsis thaliana.		P
EnsemblPlants Rel 51	TraesCS1A02G103013	TraesCS1A03G0249700		GO:0005515	protein binding	Interacting selectively and non-covalently with any protein or protein complex (a complex of two or more proteins that may include other nonprotein molecules).		F
EnsemblPlants Rel 51	TraesCS1A02G103014	TraesCS1A03G0249800		GO:0005515	protein binding	Interacting selectively and non-covalently with any protein or protein complex (a complex of two or more proteins that may include other nonprotein molecules).		F
EnsemblPlants Rel 51	TraesCS1A02G103019	TraesCS1A03G0249900		GO:0005515	protein binding	Interacting selectively and non-covalently with any protein or protein complex (a complex of two or more proteins that may include other nonprotein molecules).		F
EnsemblPlants Rel 51	TraesCS1A02G103300	TraesCS1A03G0250800		GO:0004857	enzyme inhibitor activity	Binds to and stops, prevents or reduces the activity of an enzyme.		F
EnsemblPlants Rel 51	TraesCS1A02G104000	TraesCS1A03G0251300		GO:0005515	protein binding	Interacting selectively and non-covalently with any protein or protein complex (a complex of two or more proteins that may include other nonprotein molecules).		F
EnsemblPlants Rel 51	TraesCS1A02G104600	TraesCS1A03G0253100		GO:0016021	integral component of membrane	The component of a membrane consisting of the gene products and protein complexes having at least some part of their peptide sequence embedded in the hydrophobic region of the membrane.		C
EnsemblPlants Rel 51	TraesCS1A02G104900	TraesCS1A03G0253800		GO:0008194	UDP-glycosyltransferase activity	Catalysis of the transfer of a glycosyl group from a UDP-sugar to a small hydrophobic molecule.		F
EnsemblPlants Rel 51	TraesCS1A02G105700	TraesCS1A03G0256200		GO:0003723	RNA binding	Interacting selectively and non-covalently with an RNA molecule or a portion thereof.		F
EnsemblPlants Rel 51	TraesCS1A02G105800	TraesCS1A03G0256300		GO:0016788	hydrolase activity, acting on ester bonds	Catalysis of the hydrolysis of any ester bond.		F
EnsemblPlants Rel 51	TraesCS1A02G106400	TraesCS1A03G0257800		GO:0046983	protein dimerization activity	The formation of a protein dimer, a macromolecular structure consists of two noncovalently associated identical or nonidentical subunits.		F
EnsemblPlants Rel 51	TraesCS1A02G108500	TraesCS1A03G0262100		GO:0005515	protein binding	Interacting selectively and non-covalently with any protein or protein complex (a complex of two or more proteins that may include other nonprotein molecules).		F
EnsemblPlants Rel 51	TraesCS1A02G108800	TraesCS1A03G0263400		GO:0003723	RNA binding	Interacting selectively and non-covalently with an RNA molecule or a portion thereof.		F
EnsemblPlants Rel 51	TraesCS1A02G108900	TraesCS1A03G0263600		GO:0005515	protein binding	Interacting selectively and non-covalently with any protein or protein complex (a complex of two or more proteins that may include other nonprotein molecules).		F
EnsemblPlants Rel 51	TraesCS1A02G109000	TraesCS1A03G0263700		GO:0016788	hydrolase activity, acting on ester bonds	Catalysis of the hydrolysis of any ester bond.		F
EnsemblPlants Rel 51	TraesCS1A02G109100	TraesCS1A03G0264000		GO:0016788	hydrolase activity, acting on ester bonds	Catalysis of the hydrolysis of any ester bond.		F
EnsemblPlants Rel 51	TraesCS1A02G109200	TraesCS1A03G0264500		GO:0016021	integral component of membrane	The component of a membrane consisting of the gene products and protein complexes having at least some part of their peptide sequence embedded in the hydrophobic region of the membrane.		C
EnsemblPlants Rel 51	TraesCS1A02G109600	TraesCS1A03G0265100		GO:0005509	calcium ion binding	Interacting selectively and non-covalently with calcium ions (Ca2+).		F
EnsemblPlants Rel 51	TraesCS1A02G109700	TraesCS1A03G0265300		GO:0005515	protein binding	Interacting selectively and non-covalently with any protein or protein complex (a complex of two or more proteins that may include other nonprotein molecules).		F
EnsemblPlants Rel 51	TraesCS1A02G109800	TraesCS1A03G0265400		GO:0016021	integral component of membrane	The component of a membrane consisting of the gene products and protein complexes having at least some part of their peptide sequence embedded in the hydrophobic region of the membrane.		C
EnsemblPlants Rel 51	TraesCS1A02G110400	TraesCS1A03G0266900		GO:0046983	protein dimerization activity	The formation of a protein dimer, a macromolecular structure consists of two noncovalently associated identical or nonidentical subunits.		F
EnsemblPlants Rel 51	TraesCS1A02G110700	TraesCS1A03G0267400		GO:0005515	protein binding	Interacting selectively and non-covalently with any protein or protein complex (a complex of two or more proteins that may include other nonprotein molecules).		F
EnsemblPlants Rel 51	TraesCS1A02G110800	TraesCS1A03G0267500		GO:0008194	UDP-glycosyltransferase activity	Catalysis of the transfer of a glycosyl group from a UDP-sugar to a small hydrophobic molecule.		F
EnsemblPlants Rel 51	TraesCS1A02G111300	TraesCS1A03G0270200		GO:0005515	protein binding	Interacting selectively and non-covalently with any protein or protein complex (a complex of two or more proteins that may include other nonprotein molecules).		F
EnsemblPlants Rel 51	TraesCS1A02G112100	TraesCS1A03G0272200		GO:0016021	integral component of membrane	The component of a membrane consisting of the gene products and protein complexes having at least some part of their peptide sequence embedded in the hydrophobic region of the membrane.		C
EnsemblPlants Rel 51	TraesCS1A02G112200	TraesCS1A03G0272800		GO:0003779	actin binding	Interacting selectively and non-covalently with monomeric or multimeric forms of actin, including actin filaments.		F
EnsemblPlants Rel 51	TraesCS1A02G112600	TraesCS1A03G0273200		GO:0016021	integral component of membrane	The component of a membrane consisting of the gene products and protein complexes having at least some part of their peptide sequence embedded in the hydrophobic region of the membrane.		C
EnsemblPlants Rel 51	TraesCS1A02G113000	TraesCS1A03G0275600		GO:0005524	ATP binding	Interacting selectively and non-covalently with ATP, adenosine 5'-triphosphate, a universally important coenzyme and enzyme regulator.		F
EnsemblPlants Rel 51	TraesCS1A02G113100	TraesCS1A03G0276000		GO:0016021	integral component of membrane	The component of a membrane consisting of the gene products and protein complexes having at least some part of their peptide sequence embedded in the hydrophobic region of the membrane.		C
EnsemblPlants Rel 51	TraesCS1A02G113500	TraesCS1A03G0277100		GO:0005515	protein binding	Interacting selectively and non-covalently with any protein or protein complex (a complex of two or more proteins that may include other nonprotein molecules).		F
EnsemblPlants Rel 51	TraesCS1A02G114300	TraesCS1A03G0279700		GO:0005515	protein binding	Interacting selectively and non-covalently with any protein or protein complex (a complex of two or more proteins that may include other nonprotein molecules).		F
EnsemblPlants Rel 51	TraesCS1A02G114400	TraesCS1A03G0279800		GO:0046872	metal ion binding	Interacting selectively and non-covalently with any metal ion.		F
EnsemblPlants Rel 51	TraesCS1A02G115000	TraesCS1A03G0280800		GO:0005515	protein binding	Interacting selectively and non-covalently with any protein or protein complex (a complex of two or more proteins that may include other nonprotein molecules).		F
EnsemblPlants Rel 51	TraesCS1A02G115400	TraesCS1A03G0282000		GO:0005515	protein binding	Interacting selectively and non-covalently with any protein or protein complex (a complex of two or more proteins that may include other nonprotein molecules).		F
EnsemblPlants Rel 51	TraesCS1A02G115600	TraesCS1A03G0283000		GO:0003676	nucleic acid binding	Interacting selectively and non-covalently with any nucleic acid.		F
EnsemblPlants Rel 51	TraesCS1A02G115900	TraesCS1A03G0283800	Metallothionein [Source:UniProtKB/TrEMBL;Acc:Q68HV5]	GO:0046872	metal ion binding	Interacting selectively and non-covalently with any metal ion.	ALI1	F
EnsemblPlants Rel 51	TraesCS1A02G116000	TraesCS1A03G0284000		GO:0005525	GTP binding	Interacting selectively and non-covalently with GTP, guanosine triphosphate.		F
EnsemblPlants Rel 51	TraesCS1A02G116600	TraesCS1A03G0286200		GO:0016021	integral component of membrane	The component of a membrane consisting of the gene products and protein complexes having at least some part of their peptide sequence embedded in the hydrophobic region of the membrane.		C
EnsemblPlants Rel 51	TraesCS1A02G117600	TraesCS1A03G0287900		GO:0005515	protein binding	Interacting selectively and non-covalently with any protein or protein complex (a complex of two or more proteins that may include other nonprotein molecules).		F
EnsemblPlants Rel 51	TraesCS1A02G119100	TraesCS1A03G0292800		GO:0016747	transferase activity, transferring acyl groups other than amino-acyl groups	Catalysis of the transfer of an acyl group, other than amino-acyl, from one compound (donor) to another (acceptor).		F
EnsemblPlants Rel 51	TraesCS1A02G119600	TraesCS1A03G0294200		GO:0005515	protein binding	Interacting selectively and non-covalently with any protein or protein complex (a complex of two or more proteins that may include other nonprotein molecules).		F
EnsemblPlants Rel 51	TraesCS1A02G120100	TraesCS1A03G0295000		GO:0005524	ATP binding	Interacting selectively and non-covalently with ATP, adenosine 5'-triphosphate, a universally important coenzyme and enzyme regulator.		F
EnsemblPlants Rel 51	TraesCS1A02G120400	TraesCS1A03G0295400		GO:0016021	integral component of membrane	The component of a membrane consisting of the gene products and protein complexes having at least some part of their peptide sequence embedded in the hydrophobic region of the membrane.		C
EnsemblPlants Rel 51	TraesCS1A02G120800	TraesCS1A03G0296500		GO:0005515	protein binding	Interacting selectively and non-covalently with any protein or protein complex (a complex of two or more proteins that may include other nonprotein molecules).		F
EnsemblPlants Rel 51	TraesCS1A02G121200	TraesCS1A03G0298200		GO:0005515	protein binding	Interacting selectively and non-covalently with any protein or protein complex (a complex of two or more proteins that may include other nonprotein molecules).		F
EnsemblPlants Rel 51	TraesCS1A02G122200	TraesCS1A03G0301200	Actin binding protein family [Source:Projected from Arabidopsis thaliana (AT1G52080) UniProtKB/TrEMBL;Acc:Q9SAU9]	GO:0016021	integral component of membrane	The component of a membrane consisting of the gene products and protein complexes having at least some part of their peptide sequence embedded in the hydrophobic region of the membrane.		C
EnsemblPlants Rel 51	TraesCS1A02G122900	TraesCS1A03G0304400		GO:0005515	protein binding	Interacting selectively and non-covalently with any protein or protein complex (a complex of two or more proteins that may include other nonprotein molecules).		F
EnsemblPlants Rel 51	TraesCS1A02G123200	TraesCS1A03G0305300		GO:0005515	protein binding	Interacting selectively and non-covalently with any protein or protein complex (a complex of two or more proteins that may include other nonprotein molecules).		F
EnsemblPlants Rel 51	TraesCS1A02G124100	TraesCS1A03G0308100	PRA1 family protein [Source:UniProtKB/TrEMBL;Acc:W4ZYC2]	GO:0016021	integral component of membrane	The component of a membrane consisting of the gene products and protein complexes having at least some part of their peptide sequence embedded in the hydrophobic region of the membrane.		C
EnsemblPlants Rel 51	TraesCS1A02G125700	TraesCS1A03G0312400		GO:0016021	integral component of membrane	The component of a membrane consisting of the gene products and protein complexes having at least some part of their peptide sequence embedded in the hydrophobic region of the membrane.		C
EnsemblPlants Rel 51	TraesCS1A02G126100	TraesCS1A03G0313300		GO:0016788	hydrolase activity, acting on ester bonds	Catalysis of the hydrolysis of any ester bond.		F
EnsemblPlants Rel 51	TraesCS1A02G128700	TraesCS1A03G0321500		GO:0016020	membrane	A lipid bilayer along with all the proteins and protein complexes embedded in it an attached to it.		C
EnsemblPlants Rel 51	TraesCS1A02G128800	TraesCS1A03G0321600		GO:0003676	nucleic acid binding	Interacting selectively and non-covalently with any nucleic acid.		F
EnsemblPlants Rel 51	TraesCS1A02G128900	TraesCS1A03G0322200		GO:0046983	protein dimerization activity	The formation of a protein dimer, a macromolecular structure consists of two noncovalently associated identical or nonidentical subunits.		F
EnsemblPlants Rel 51	TraesCS1A02G129000	TraesCS1A03G0322700		GO:0004857	enzyme inhibitor activity	Binds to and stops, prevents or reduces the activity of an enzyme.		F
EnsemblPlants Rel 51	TraesCS1A02G129200	TraesCS1A03G0324000		GO:0016021	integral component of membrane	The component of a membrane consisting of the gene products and protein complexes having at least some part of their peptide sequence embedded in the hydrophobic region of the membrane.		C
EnsemblPlants Rel 51	TraesCS1A02G129800	TraesCS1A03G0326800		GO:0006511	ubiquitin-dependent protein catabolic process	The chemical reactions and pathways resulting in the breakdown of a protein or peptide by hydrolysis of its peptide bonds, initiated by the covalent attachment of a ubiquitin group, or multiple ubiquitin groups, to the protein.		P
EnsemblPlants Rel 51	TraesCS1A02G130600	TraesCS1A03G0328800		GO:0005515	protein binding	Interacting selectively and non-covalently with any protein or protein complex (a complex of two or more proteins that may include other nonprotein molecules).		F
EnsemblPlants Rel 51	TraesCS1A02G130900	TraesCS1A03G0330400		GO:0003677	DNA binding	Any molecular function by which a gene product interacts selectively and non-covalently with DNA (deoxyribonucleic acid).		F
EnsemblPlants Rel 51	TraesCS1A02G131300	TraesCS1A03G0331900		GO:0005509	calcium ion binding	Interacting selectively and non-covalently with calcium ions (Ca2+).		F
EnsemblPlants Rel 51	TraesCS1A02G133500	TraesCS1A03G0341100	Pentatricopeptide repeat-containing protein MRL1, chloroplastic [Source:Projected from Arabidopsis thaliana (AT4G34830) UniProtKB/Swiss-Prot;Acc:Q0WLC6]	GO:0005515	protein binding	Interacting selectively and non-covalently with any protein or protein complex (a complex of two or more proteins that may include other nonprotein molecules).		F
EnsemblPlants Rel 51	TraesCS1A02G133800	TraesCS1A03G0342300		GO:0005634	nucleus	A membrane-bounded organelle of eukaryotic cells in which chromosomes are housed and replicated. In most cells, the nucleus contains all of the cell's chromosomes except the organellar chromosomes, and is the site of RNA synthesis and processing. In some species, or in specialized cell types, RNA metabolism or DNA replication may be absent.		C
EnsemblPlants Rel 51	TraesCS1A02G134000	TraesCS1A03G0343000		GO:0005509	calcium ion binding	Interacting selectively and non-covalently with calcium ions (Ca2+).		F
EnsemblPlants Rel 51	TraesCS1A02G134600	TraesCS1A03G0347400		GO:0005509	calcium ion binding	Interacting selectively and non-covalently with calcium ions (Ca2+).		F
EnsemblPlants Rel 51	TraesCS1A02G134800	TraesCS1A03G0348600		GO:0000123	histone acetyltransferase complex	A protein complex that possesses histone acetyltransferase activity.		C
EnsemblPlants Rel 51	TraesCS1A02G135300	TraesCS1A03G0350800		GO:0004386	helicase activity	Catalysis of the reaction: ATP + H2O = ADP + phosphate, to drive the unwinding of a DNA or RNA helix.		F
EnsemblPlants Rel 51	TraesCS1A02G135900	TraesCS1A03G0353200		GO:0016788	hydrolase activity, acting on ester bonds	Catalysis of the hydrolysis of any ester bond.		F
EnsemblPlants Rel 51	TraesCS1A02G136000	TraesCS1A03G0353300		GO:0005515	protein binding	Interacting selectively and non-covalently with any protein or protein complex (a complex of two or more proteins that may include other nonprotein molecules).		F
EnsemblPlants Rel 51	TraesCS1A02G136200	TraesCS1A03G0355000	SLOMO [Source:Projected from Arabidopsis thaliana (AT4G33210) UniProtKB/TrEMBL;Acc:A0A178V148]	GO:0005515	protein binding	Interacting selectively and non-covalently with any protein or protein complex (a complex of two or more proteins that may include other nonprotein molecules).		F
EnsemblPlants Rel 51	TraesCS1A02G136700	TraesCS1A03G0359400		GO:0016746	transferase activity, transferring acyl groups	Catalysis of the transfer of an acyl group from one compound (donor) to another (acceptor).		F
EnsemblPlants Rel 51	TraesCS1A02G136800	TraesCS1A03G0359500		GO:0008168	methyltransferase activity	Catalysis of the transfer of a methyl group to an acceptor molecule.		F
EnsemblPlants Rel 51	TraesCS1A02G136900	TraesCS1A03G0360300	Core-2/I-branching beta-1,6-N-acetylglucosaminyltransferase family protein [Source:Projected from Arabidopsis thaliana (AT3G03690) UniProtKB/TrEMBL;Acc:Q9SS69]	GO:0016020	membrane	A lipid bilayer along with all the proteins and protein complexes embedded in it an attached to it.		C
EnsemblPlants Rel 51	TraesCS1A02G137300	TraesCS1A03G0361700		GO:0016021	integral component of membrane	The component of a membrane consisting of the gene products and protein complexes having at least some part of their peptide sequence embedded in the hydrophobic region of the membrane.		C
EnsemblPlants Rel 51	TraesCS1A02G137700	TraesCS1A03G0363800		GO:0016021	integral component of membrane	The component of a membrane consisting of the gene products and protein complexes having at least some part of their peptide sequence embedded in the hydrophobic region of the membrane.		C
EnsemblPlants Rel 51	TraesCS1A02G138000	TraesCS1A03G0366300		GO:0005886	plasma membrane	The membrane surrounding a cell that separates the cell from its external environment. It consists of a phospholipid bilayer and associated proteins.		C
EnsemblPlants Rel 51	TraesCS1A02G138300	TraesCS1A03G0368700		GO:0005634	nucleus	A membrane-bounded organelle of eukaryotic cells in which chromosomes are housed and replicated. In most cells, the nucleus contains all of the cell's chromosomes except the organellar chromosomes, and is the site of RNA synthesis and processing. In some species, or in specialized cell types, RNA metabolism or DNA replication may be absent.		C
EnsemblPlants Rel 51	TraesCS1A02G138400	TraesCS1A03G0369600		GO:0003779	actin binding	Interacting selectively and non-covalently with monomeric or multimeric forms of actin, including actin filaments.		F
EnsemblPlants Rel 51	TraesCS1A02G138500	TraesCS1A03G0369700		GO:0044237	cellular metabolic process	The chemical reactions and pathways by which individual cells transform chemical substances.		P
EnsemblPlants Rel 51	TraesCS1A02G139200	TraesCS1A03G0371400		GO:0016746	transferase activity, transferring acyl groups	Catalysis of the transfer of an acyl group from one compound (donor) to another (acceptor).		F
EnsemblPlants Rel 51	TraesCS1A02G139500	TraesCS1A03G0372800		GO:0003676	nucleic acid binding	Interacting selectively and non-covalently with any nucleic acid.		F
EnsemblPlants Rel 51	TraesCS1A02G140000	TraesCS1A03G0374800		GO:0003677	DNA binding	Any molecular function by which a gene product interacts selectively and non-covalently with DNA (deoxyribonucleic acid).		F
EnsemblPlants Rel 51	TraesCS1A02G140600	TraesCS1A03G0376700		GO:0015035	protein disulfide oxidoreductase activity	Catalysis of the reaction: a protein with reduced sulfide groups = a protein with oxidized disulfide bonds.		F
EnsemblPlants Rel 51	TraesCS1A02G141100	TraesCS1A03G0377800		GO:0016021	integral component of membrane	The component of a membrane consisting of the gene products and protein complexes having at least some part of their peptide sequence embedded in the hydrophobic region of the membrane.		C
EnsemblPlants Rel 51	TraesCS1A02G141200	TraesCS1A03G0377900	Pentatricopeptide repeat-containing protein At5g08305 [Source:Projected from Arabidopsis thaliana (AT5G08305) UniProtKB/Swiss-Prot;Acc:P0C8Q7]	GO:0005515	protein binding	Interacting selectively and non-covalently with any protein or protein complex (a complex of two or more proteins that may include other nonprotein molecules).		F
EnsemblPlants Rel 51	TraesCS1A02G141600	TraesCS1A03G0379700		GO:0003677	DNA binding	Any molecular function by which a gene product interacts selectively and non-covalently with DNA (deoxyribonucleic acid).		F
EnsemblPlants Rel 51	TraesCS1A02G142200	TraesCS1A03G0381000		GO:0016021	integral component of membrane	The component of a membrane consisting of the gene products and protein complexes having at least some part of their peptide sequence embedded in the hydrophobic region of the membrane.		C
EnsemblPlants Rel 51	TraesCS1A02G142300	TraesCS1A03G0381500		GO:0003677	DNA binding	Any molecular function by which a gene product interacts selectively and non-covalently with DNA (deoxyribonucleic acid).		F
EnsemblPlants Rel 51	TraesCS1A02G142500	TraesCS1A03G0382100		GO:0005515	protein binding	Interacting selectively and non-covalently with any protein or protein complex (a complex of two or more proteins that may include other nonprotein molecules).		F
EnsemblPlants Rel 51	TraesCS1A02G143500	TraesCS1A03G0386600		GO:0003676	nucleic acid binding	Interacting selectively and non-covalently with any nucleic acid.		F
EnsemblPlants Rel 51	TraesCS1A02G144000	TraesCS1A03G0387200	CHR20 [Source:Projected from Arabidopsis thaliana (AT1G08600) UniProtKB/TrEMBL;Acc:A0A178VZQ9]	GO:0005524	ATP binding	Interacting selectively and non-covalently with ATP, adenosine 5'-triphosphate, a universally important coenzyme and enzyme regulator.		F
EnsemblPlants Rel 51	TraesCS1A02G144100	TraesCS1A03G0387300		GO:0016788	hydrolase activity, acting on ester bonds	Catalysis of the hydrolysis of any ester bond.		F
EnsemblPlants Rel 51	TraesCS1A02G144700	TraesCS1A03G0390500		GO:0005515	protein binding	Interacting selectively and non-covalently with any protein or protein complex (a complex of two or more proteins that may include other nonprotein molecules).		F
EnsemblPlants Rel 51	TraesCS1A02G144800	TraesCS1A03G0390800	Plastid transcriptionally active 3 [Source:Projected from Arabidopsis thaliana (AT3G04260) UniProtKB/TrEMBL;Acc:F4J3M2]	GO:0005515	protein binding	Interacting selectively and non-covalently with any protein or protein complex (a complex of two or more proteins that may include other nonprotein molecules).		F
EnsemblPlants Rel 51	TraesCS1A02G144900	TraesCS1A03G0391100		GO:0005515	protein binding	Interacting selectively and non-covalently with any protein or protein complex (a complex of two or more proteins that may include other nonprotein molecules).		F
EnsemblPlants Rel 51	TraesCS1A02G145300	TraesCS1A03G0391700		GO:0016788	hydrolase activity, acting on ester bonds	Catalysis of the hydrolysis of any ester bond.		F
EnsemblPlants Rel 51	TraesCS1A02G146200	TraesCS1A03G0393700		GO:0005515	protein binding	Interacting selectively and non-covalently with any protein or protein complex (a complex of two or more proteins that may include other nonprotein molecules).		F
EnsemblPlants Rel 51	TraesCS1A02G147400	TraesCS1A03G0397200		GO:0016301	kinase activity	Catalysis of the transfer of a phosphate group, usually from ATP, to a substrate molecule.		F
EnsemblPlants Rel 51	TraesCS1A02G148300	TraesCS1A03G0400500		GO:0005515	protein binding	Interacting selectively and non-covalently with any protein or protein complex (a complex of two or more proteins that may include other nonprotein molecules).		F
EnsemblPlants Rel 51	TraesCS1A02G150500	TraesCS1A03G0404500		GO:0003779	actin binding	Interacting selectively and non-covalently with monomeric or multimeric forms of actin, including actin filaments.		F
EnsemblPlants Rel 51	TraesCS1A02G151200	TraesCS1A03G0406000		GO:0005515	protein binding	Interacting selectively and non-covalently with any protein or protein complex (a complex of two or more proteins that may include other nonprotein molecules).		F
EnsemblPlants Rel 51	TraesCS1A02G152000	TraesCS1A03G0407700		GO:0005515	protein binding	Interacting selectively and non-covalently with any protein or protein complex (a complex of two or more proteins that may include other nonprotein molecules).		F
EnsemblPlants Rel 51	TraesCS1A02G152300	TraesCS1A03G0408500		GO:0043531	ADP binding	Interacting selectively and non-covalently with ADP, adenosine 5'-diphosphate.		F
EnsemblPlants Rel 51	TraesCS1A02G153600	TraesCS1A03G0412400	Vacuolar protein sorting-associated protein 2 homolog 3 [Source:Projected from Arabidopsis thaliana (AT1G03950) UniProtKB/Swiss-Prot;Acc:Q941D5]	GO:0007034	vacuolar transport	The directed movement of substances into, out of or within a vacuole.		P
EnsemblPlants Rel 51	TraesCS1A02G153900	TraesCS1A03G0413200		GO:0005509	calcium ion binding	Interacting selectively and non-covalently with calcium ions (Ca2+).		F
EnsemblPlants Rel 51	TraesCS1A02G154100	TraesCS1A03G0413400		GO:0005515	protein binding	Interacting selectively and non-covalently with any protein or protein complex (a complex of two or more proteins that may include other nonprotein molecules).		F
EnsemblPlants Rel 51	TraesCS1A02G155000	TraesCS1A03G0415700		GO:0016021	integral component of membrane	The component of a membrane consisting of the gene products and protein complexes having at least some part of their peptide sequence embedded in the hydrophobic region of the membrane.		C
EnsemblPlants Rel 51	TraesCS1A02G155300	TraesCS1A03G0416900		GO:0003677	DNA binding	Any molecular function by which a gene product interacts selectively and non-covalently with DNA (deoxyribonucleic acid).		F
EnsemblPlants Rel 51	TraesCS1A02G155500	TraesCS1A03G0417200		GO:0016021	integral component of membrane	The component of a membrane consisting of the gene products and protein complexes having at least some part of their peptide sequence embedded in the hydrophobic region of the membrane.		C
EnsemblPlants Rel 51	TraesCS1A02G156000	TraesCS1A03G0419000		GO:0005515	protein binding	Interacting selectively and non-covalently with any protein or protein complex (a complex of two or more proteins that may include other nonprotein molecules).		F
EnsemblPlants Rel 51	TraesCS1A02G156400	TraesCS1A03G0419600		GO:0016021	integral component of membrane	The component of a membrane consisting of the gene products and protein complexes having at least some part of their peptide sequence embedded in the hydrophobic region of the membrane.		C
EnsemblPlants Rel 51	TraesCS1A02G156500	TraesCS1A03G0420300		GO:0008289	lipid binding	Interacting selectively and non-covalently with a lipid.		F
EnsemblPlants Rel 51	TraesCS1A02G158200	TraesCS1A03G0427500		GO:0016021	integral component of membrane	The component of a membrane consisting of the gene products and protein complexes having at least some part of their peptide sequence embedded in the hydrophobic region of the membrane.		C
EnsemblPlants Rel 51	TraesCS1A02G158300	TraesCS1A03G0427800		GO:0009536	plastid	Any member of a family of organelles found in the cytoplasm of plants and some protists, which are membrane-bounded and contain DNA. Plant plastids develop from a common type, the proplastid.		C
EnsemblPlants Rel 51	TraesCS1A02G158600	TraesCS1A03G0428200		GO:0016021	integral component of membrane	The component of a membrane consisting of the gene products and protein complexes having at least some part of their peptide sequence embedded in the hydrophobic region of the membrane.		C
EnsemblPlants Rel 51	TraesCS1A02G159700	TraesCS1A03G0430900		GO:0016021	integral component of membrane	The component of a membrane consisting of the gene products and protein complexes having at least some part of their peptide sequence embedded in the hydrophobic region of the membrane.		C
EnsemblPlants Rel 51	TraesCS1A02G160000	TraesCS1A03G0432300		GO:0005515	protein binding	Interacting selectively and non-covalently with any protein or protein complex (a complex of two or more proteins that may include other nonprotein molecules).		F
EnsemblPlants Rel 51	TraesCS1A02G160400	TraesCS1A03G0432800		GO:0005515	protein binding	Interacting selectively and non-covalently with any protein or protein complex (a complex of two or more proteins that may include other nonprotein molecules).		F
EnsemblPlants Rel 51	TraesCS1A02G160500	TraesCS1A03G0432900	Pre-mRNA-processing protein 40C [Source:Projected from Arabidopsis thaliana (AT3G19840) UniProtKB/Swiss-Prot;Acc:Q9LT25]	GO:0005515	protein binding	Interacting selectively and non-covalently with any protein or protein complex (a complex of two or more proteins that may include other nonprotein molecules).		F
EnsemblPlants Rel 51	TraesCS1A02G161000	TraesCS1A03G0435000		GO:0016021	integral component of membrane	The component of a membrane consisting of the gene products and protein complexes having at least some part of their peptide sequence embedded in the hydrophobic region of the membrane.		C
EnsemblPlants Rel 51	TraesCS1A02G161200	TraesCS1A03G0435600		GO:0005515	protein binding	Interacting selectively and non-covalently with any protein or protein complex (a complex of two or more proteins that may include other nonprotein molecules).		F
EnsemblPlants Rel 51	TraesCS1A02G162300	TraesCS1A03G0438300		GO:0016773	phosphotransferase activity, alcohol group as acceptor	Catalysis of the transfer of a phosphorus-containing group from one compound (donor) to an alcohol group (acceptor).		F
EnsemblPlants Rel 51	TraesCS1A02G162400	TraesCS1A03G0438500		GO:0061630	ubiquitin protein ligase activity	Catalysis of the transfer of ubiquitin to a substrate protein via the reaction X-ubiquitin + S -> X + S-ubiquitin, where X is either an E2 or E3 enzyme, the X-ubiquitin linkage is a thioester bond, and the S-ubiquitin linkage is an amide bond: an isopeptide bond between the C-terminal glycine of ubiquitin and the epsilon-amino group of lysine residues in the substrate or, in the linear extension …		F
EnsemblPlants Rel 51	TraesCS1A02G163600	TraesCS1A03G0442800		GO:0005515	protein binding	Interacting selectively and non-covalently with any protein or protein complex (a complex of two or more proteins that may include other nonprotein molecules).		F
EnsemblPlants Rel 51	TraesCS1A02G163700	TraesCS1A03G0443400		GO:0005515	protein binding	Interacting selectively and non-covalently with any protein or protein complex (a complex of two or more proteins that may include other nonprotein molecules).		F
EnsemblPlants Rel 51	TraesCS1A02G163800	TraesCS1A03G0444300		GO:0004190	aspartic-type endopeptidase activity	Catalysis of the hydrolysis of internal, alpha-peptide bonds in a polypeptide chain by a mechanism in which a water molecule bound by the side chains of aspartic residues at the active center acts as a nucleophile.		F
EnsemblPlants Rel 51	TraesCS1A02G164000	TraesCS1A03G0445000		GO:0005515	protein binding	Interacting selectively and non-covalently with any protein or protein complex (a complex of two or more proteins that may include other nonprotein molecules).		F
EnsemblPlants Rel 51	TraesCS1A02G164100	TraesCS1A03G0445200		GO:0005515	protein binding	Interacting selectively and non-covalently with any protein or protein complex (a complex of two or more proteins that may include other nonprotein molecules).		F
EnsemblPlants Rel 51	TraesCS1A02G165700	TraesCS1A03G0449900		GO:0009507	chloroplast	A chlorophyll-containing plastid with thylakoids organized into grana and frets, or stroma thylakoids, and embedded in a stroma.		C
EnsemblPlants Rel 51	TraesCS1A02G165800	TraesCS1A03G0450000	Protein TIC110, chloroplastic [Source:Projected from Arabidopsis thaliana (AT1G06950) UniProtKB/Swiss-Prot;Acc:Q8LPR9]	GO:0009507	chloroplast	A chlorophyll-containing plastid with thylakoids organized into grana and frets, or stroma thylakoids, and embedded in a stroma.		C
EnsemblPlants Rel 51	TraesCS1A02G165900	TraesCS1A03G0450100		GO:0003676	nucleic acid binding	Interacting selectively and non-covalently with any nucleic acid.		F
EnsemblPlants Rel 51	TraesCS1A02G166400	TraesCS1A03G0451000		GO:0043531	ADP binding	Interacting selectively and non-covalently with ADP, adenosine 5'-diphosphate.		F
EnsemblPlants Rel 51	TraesCS1A02G168700	TraesCS1A03G0455100		GO:0005515	protein binding	Interacting selectively and non-covalently with any protein or protein complex (a complex of two or more proteins that may include other nonprotein molecules).		F
EnsemblPlants Rel 51	TraesCS1A02G168800	TraesCS1A03G0455600		GO:0005515	protein binding	Interacting selectively and non-covalently with any protein or protein complex (a complex of two or more proteins that may include other nonprotein molecules).		F
EnsemblPlants Rel 51	TraesCS1A02G169000	TraesCS1A03G0455800		GO:0003676	nucleic acid binding	Interacting selectively and non-covalently with any nucleic acid.		F
EnsemblPlants Rel 51	TraesCS1A02G169200	TraesCS1A03G0456100		GO:0008080	N-acetyltransferase activity	Catalysis of the transfer of an acetyl group to a nitrogen atom on the acceptor molecule.		F
EnsemblPlants Rel 51	TraesCS1A02G169600	TraesCS1A03G0457400		GO:0047429	nucleoside-triphosphate diphosphatase activity	Catalysis of the reaction: H2O + a nucleoside triphosphate = diphosphate + a nucleotide.		F
EnsemblPlants Rel 51	TraesCS1A02G169700	TraesCS1A03G0457900		GO:0005515	protein binding	Interacting selectively and non-covalently with any protein or protein complex (a complex of two or more proteins that may include other nonprotein molecules).		F
EnsemblPlants Rel 51	TraesCS1A02G170600	TraesCS1A03G0460600		GO:0003824	catalytic activity	Catalysis of a biochemical reaction at physiological temperatures. In biologically catalyzed reactions, the reactants are known as substrates, and the catalysts are naturally occurring macromolecular substances known as enzymes. Enzymes possess specific binding sites for substrates, and are usually composed wholly or largely of protein, but RNA that has catalytic activity (ribozyme) is often also…		F
EnsemblPlants Rel 51	TraesCS1A02G170700	TraesCS1A03G0460700		GO:0003824	catalytic activity	Catalysis of a biochemical reaction at physiological temperatures. In biologically catalyzed reactions, the reactants are known as substrates, and the catalysts are naturally occurring macromolecular substances known as enzymes. Enzymes possess specific binding sites for substrates, and are usually composed wholly or largely of protein, but RNA that has catalytic activity (ribozyme) is often also…		F
EnsemblPlants Rel 51	TraesCS1A02G171400	TraesCS1A03G0462200		GO:0016021	integral component of membrane	The component of a membrane consisting of the gene products and protein complexes having at least some part of their peptide sequence embedded in the hydrophobic region of the membrane.		C
EnsemblPlants Rel 51	TraesCS1A02G171900	TraesCS1A03G0463100		GO:0005515	protein binding	Interacting selectively and non-covalently with any protein or protein complex (a complex of two or more proteins that may include other nonprotein molecules).		F
EnsemblPlants Rel 51	TraesCS1A02G172600	TraesCS1A03G0465000		GO:0005515	protein binding	Interacting selectively and non-covalently with any protein or protein complex (a complex of two or more proteins that may include other nonprotein molecules).		F
EnsemblPlants Rel 51	TraesCS1A02G173500	TraesCS1A03G0467000		GO:0005515	protein binding	Interacting selectively and non-covalently with any protein or protein complex (a complex of two or more proteins that may include other nonprotein molecules).		F
EnsemblPlants Rel 51	TraesCS1A02G173800	TraesCS1A03G0468700		GO:0016747	transferase activity, transferring acyl groups other than amino-acyl groups	Catalysis of the transfer of an acyl group, other than amino-acyl, from one compound (donor) to another (acceptor).		F
EnsemblPlants Rel 51	TraesCS1A02G173900	TraesCS1A03G0468900		GO:0016747	transferase activity, transferring acyl groups other than amino-acyl groups	Catalysis of the transfer of an acyl group, other than amino-acyl, from one compound (donor) to another (acceptor).		F
EnsemblPlants Rel 51	TraesCS1A02G174500	TraesCS1A03G0471100		GO:0016021	integral component of membrane	The component of a membrane consisting of the gene products and protein complexes having at least some part of their peptide sequence embedded in the hydrophobic region of the membrane.		C
EnsemblPlants Rel 51	TraesCS1A02G174900	TraesCS1A03G0471700		GO:0016491	oxidoreductase activity	Catalysis of an oxidation-reduction (redox) reaction, a reversible chemical reaction in which the oxidation state of an atom or atoms within a molecule is altered. One substrate acts as a hydrogen or electron donor and becomes oxidized, while the other acts as hydrogen or electron acceptor and becomes reduced.		F
EnsemblPlants Rel 51	TraesCS1A02G175200	TraesCS1A03G0472600		GO:0006869	lipid transport	The directed movement of lipids into, out of or within a cell, or between cells, by means of some agent such as a transporter or pore. Lipids are compounds soluble in an organic solvent but not, or sparingly, in an aqueous solvent.		P
EnsemblPlants Rel 51	TraesCS1A02G175500	TraesCS1A03G0473200		GO:0009737	response to abscisic acid	Any process that results in a change in state or activity of a cell or an organism (in terms of movement, secretion, enzyme production, gene expression, etc.) as a result of an abscisic acid stimulus.		P
EnsemblPlants Rel 51	TraesCS1A02G175600	TraesCS1A03G0473400		GO:0005515	protein binding	Interacting selectively and non-covalently with any protein or protein complex (a complex of two or more proteins that may include other nonprotein molecules).		F
EnsemblPlants Rel 51	TraesCS1A02G175700	TraesCS1A03G0473800		GO:0005515	protein binding	Interacting selectively and non-covalently with any protein or protein complex (a complex of two or more proteins that may include other nonprotein molecules).		F
EnsemblPlants Rel 51	TraesCS1A02G176300	TraesCS1A03G0474700	YABBY family transcription factor, Leaf developmen [Source: Projected from Oryza sativa (Os10g0508300)]	GO:0007275	multicellular organism development	The biological process whose specific outcome is the progression of a multicellular organism over time from an initial condition (e.g. a zygote or a young adult) to a later condition (e.g. a multicellular animal or an aged adult).		P
EnsemblPlants Rel 51	TraesCS1A02G177700	TraesCS1A03G0480300		GO:0005515	protein binding	Interacting selectively and non-covalently with any protein or protein complex (a complex of two or more proteins that may include other nonprotein molecules).		F
EnsemblPlants Rel 51	TraesCS1A02G178700	TraesCS1A03G0483200		GO:0009733	response to auxin	Any process that results in a change in state or activity of a cell or an organism (in terms of movement, secretion, enzyme production, gene expression, etc.) as a result of an auxin stimulus.		P
EnsemblPlants Rel 51	TraesCS1A02G179400	TraesCS1A03G0484600		GO:0098869	cellular oxidant detoxification	Any process carried out at the cellular level that reduces or removes the toxicity superoxide radicals or hydrogen peroxide.		P
EnsemblPlants Rel 51	TraesCS1A02G180000	TraesCS1A03G0485900		GO:0004857	enzyme inhibitor activity	Binds to and stops, prevents or reduces the activity of an enzyme.		F
EnsemblPlants Rel 51	TraesCS1A02G181100	TraesCS1A03G0488100		GO:0005634	nucleus	A membrane-bounded organelle of eukaryotic cells in which chromosomes are housed and replicated. In most cells, the nucleus contains all of the cell's chromosomes except the organellar chromosomes, and is the site of RNA synthesis and processing. In some species, or in specialized cell types, RNA metabolism or DNA replication may be absent.		C
EnsemblPlants Rel 51	TraesCS1A02G181400	TraesCS1A03G0488800		GO:0016021	integral component of membrane	The component of a membrane consisting of the gene products and protein complexes having at least some part of their peptide sequence embedded in the hydrophobic region of the membrane.		C
EnsemblPlants Rel 51	TraesCS1A02G181600	TraesCS1A03G0489000		GO:0005515	protein binding	Interacting selectively and non-covalently with any protein or protein complex (a complex of two or more proteins that may include other nonprotein molecules).		F
EnsemblPlants Rel 51	TraesCS1A02G182200	TraesCS1A03G0490200		GO:0009638	phototropism	The movement of an organism, or part of an organism, in response to a light stimulus, usually toward or away from it.		P
EnsemblPlants Rel 51	TraesCS1A02G182600	TraesCS1A03G0491400		GO:0005515	protein binding	Interacting selectively and non-covalently with any protein or protein complex (a complex of two or more proteins that may include other nonprotein molecules).		F
EnsemblPlants Rel 51	TraesCS1A02G182700	TraesCS1A03G0491900		GO:0005515	protein binding	Interacting selectively and non-covalently with any protein or protein complex (a complex of two or more proteins that may include other nonprotein molecules).		F
EnsemblPlants Rel 51	TraesCS1A02G182800	TraesCS1A03G0492000		GO:0046872	metal ion binding	Interacting selectively and non-covalently with any metal ion.		F
EnsemblPlants Rel 51	TraesCS1A02G185400	TraesCS1A03G0500000		GO:0045892	negative regulation of transcription, DNA-templated	Any process that stops, prevents, or reduces the frequency, rate or extent of cellular DNA-templated transcription.		P
EnsemblPlants Rel 51	TraesCS1A02G187400	TraesCS1A03G0503700		GO:0003824	catalytic activity	Catalysis of a biochemical reaction at physiological temperatures. In biologically catalyzed reactions, the reactants are known as substrates, and the catalysts are naturally occurring macromolecular substances known as enzymes. Enzymes possess specific binding sites for substrates, and are usually composed wholly or largely of protein, but RNA that has catalytic activity (ribozyme) is often also…		F
EnsemblPlants Rel 51	TraesCS1A02G187600	TraesCS1A03G0503900		GO:0005515	protein binding	Interacting selectively and non-covalently with any protein or protein complex (a complex of two or more proteins that may include other nonprotein molecules).		F
EnsemblPlants Rel 51	TraesCS1A02G188500	TraesCS1A03G0505500		GO:0005515	protein binding	Interacting selectively and non-covalently with any protein or protein complex (a complex of two or more proteins that may include other nonprotein molecules).		F
EnsemblPlants Rel 51	TraesCS1A02G188700	TraesCS1A03G0505800		GO:0005515	protein binding	Interacting selectively and non-covalently with any protein or protein complex (a complex of two or more proteins that may include other nonprotein molecules).		F
EnsemblPlants Rel 51	TraesCS1A02G190000	TraesCS1A03G0509500	DAR GTPase 2, mitochondrial [Source:Projected from Arabidopsis thaliana (AT4G10650) UniProtKB/Swiss-Prot;Acc:O82497]	GO:0005525	GTP binding	Interacting selectively and non-covalently with GTP, guanosine triphosphate.		F
EnsemblPlants Rel 51	TraesCS1A02G190500	TraesCS1A03G0511000		GO:0005515	protein binding	Interacting selectively and non-covalently with any protein or protein complex (a complex of two or more proteins that may include other nonprotein molecules).		F
EnsemblPlants Rel 51	TraesCS1A02G190800	TraesCS1A03G0511700		GO:0003860	3-hydroxyisobutyryl-CoA hydrolase activity	Catalysis of the reaction: 3-hydroxy-2-methylpropanoyl-CoA + H2O = CoA + 3-hydroxy-2-methylpropanoate.		F
EnsemblPlants Rel 51	TraesCS1A02G190900	TraesCS1A03G0511800		GO:0003680	minor groove of adenine-thymine-rich DNA binding	Interacting selectively and non-covalently with the structure formed by the minor groove of adenine-thymine-rich DNA regions. Examples of proteins having this function are AT-rich interaction domain (ARID)-containing proteins.		F
EnsemblPlants Rel 51	TraesCS1A02G191900	TraesCS1A03G0514800		GO:0016021	integral component of membrane	The component of a membrane consisting of the gene products and protein complexes having at least some part of their peptide sequence embedded in the hydrophobic region of the membrane.		C
EnsemblPlants Rel 51	TraesCS1A02G192100	TraesCS1A03G0515100		GO:0003677	DNA binding	Any molecular function by which a gene product interacts selectively and non-covalently with DNA (deoxyribonucleic acid).		F
EnsemblPlants Rel 51	TraesCS1A02G192500	TraesCS1A03G0515800		GO:0005515	protein binding	Interacting selectively and non-covalently with any protein or protein complex (a complex of two or more proteins that may include other nonprotein molecules).		F
EnsemblPlants Rel 51	TraesCS1A02G193100	TraesCS1A03G0517500		GO:0005515	protein binding	Interacting selectively and non-covalently with any protein or protein complex (a complex of two or more proteins that may include other nonprotein molecules).		F
EnsemblPlants Rel 51	TraesCS1A02G193200	TraesCS1A03G0517900		GO:0046983	protein dimerization activity	The formation of a protein dimer, a macromolecular structure consists of two noncovalently associated identical or nonidentical subunits.		F
EnsemblPlants Rel 51	TraesCS1A02G193700	TraesCS1A03G0520200		GO:0005509	calcium ion binding	Interacting selectively and non-covalently with calcium ions (Ca2+).		F
EnsemblPlants Rel 51	TraesCS1A02G194200	TraesCS1A03G0520900		GO:0005515	protein binding	Interacting selectively and non-covalently with any protein or protein complex (a complex of two or more proteins that may include other nonprotein molecules).		F
EnsemblPlants Rel 51	TraesCS1A02G194900	TraesCS1A03G0523000		GO:0003824	catalytic activity	Catalysis of a biochemical reaction at physiological temperatures. In biologically catalyzed reactions, the reactants are known as substrates, and the catalysts are naturally occurring macromolecular substances known as enzymes. Enzymes possess specific binding sites for substrates, and are usually composed wholly or largely of protein, but RNA that has catalytic activity (ribozyme) is often also…		F
EnsemblPlants Rel 51	TraesCS1A02G195312	TraesCS1A03G0524700		GO:0005515	protein binding	Interacting selectively and non-covalently with any protein or protein complex (a complex of two or more proteins that may include other nonprotein molecules).		F
EnsemblPlants Rel 51	TraesCS1A02G195400	TraesCS1A03G0525100		GO:0003950	NAD+ ADP-ribosyltransferase activity	Catalysis of the reaction: NAD+ + (ADP-D-ribosyl)(n)-acceptor = nicotinamide + (ADP-D-ribosyl)(n+1)-acceptor.		F
EnsemblPlants Rel 51	TraesCS1A02G195500	TraesCS1A03G0525200		GO:0009507	chloroplast	A chlorophyll-containing plastid with thylakoids organized into grana and frets, or stroma thylakoids, and embedded in a stroma.		C
EnsemblPlants Rel 51	TraesCS1A02G196200	TraesCS1A03G0527200		GO:0005515	protein binding	Interacting selectively and non-covalently with any protein or protein complex (a complex of two or more proteins that may include other nonprotein molecules).		F
EnsemblPlants Rel 51	TraesCS1A02G196400	TraesCS1A03G0527900		GO:0008168	methyltransferase activity	Catalysis of the transfer of a methyl group to an acceptor molecule.		F
EnsemblPlants Rel 51	TraesCS1A02G198900	TraesCS1A03G0532100	Patellin-6 [Source:Projected from Arabidopsis thaliana (AT3G51670) UniProtKB/Swiss-Prot;Acc:Q9SCU1]	GO:0005886	plasma membrane	The membrane surrounding a cell that separates the cell from its external environment. It consists of a phospholipid bilayer and associated proteins.		C
EnsemblPlants Rel 51	TraesCS1A02G200000	TraesCS1A03G0534000		GO:0009579	thylakoid	A membranous cellular structure that bears the photosynthetic pigments in plants, algae, and cyanobacteria. In cyanobacteria thylakoids are of various shapes and are attached to, or continuous with, the plasma membrane. In eukaryotes they are flattened, membrane-bounded disk-like structures located in the chloroplasts; in the chloroplasts of higher plants the thylakoids form dense stacks called g…		C
EnsemblPlants Rel 51	TraesCS1A02G200400	TraesCS1A03G0535900		GO:0046872	metal ion binding	Interacting selectively and non-covalently with any metal ion.		F
EnsemblPlants Rel 51	TraesCS1A02G200500	TraesCS1A03G0536300		GO:0003677	DNA binding	Any molecular function by which a gene product interacts selectively and non-covalently with DNA (deoxyribonucleic acid).		F
EnsemblPlants Rel 51	TraesCS1A02G200800	TraesCS1A03G0536900		GO:0016021	integral component of membrane	The component of a membrane consisting of the gene products and protein complexes having at least some part of their peptide sequence embedded in the hydrophobic region of the membrane.		C
EnsemblPlants Rel 51	TraesCS1A02G200900	TraesCS1A03G0537300		GO:0004386	helicase activity	Catalysis of the reaction: ATP + H2O = ADP + phosphate, to drive the unwinding of a DNA or RNA helix.		F
EnsemblPlants Rel 51	TraesCS1A02G201100	TraesCS1A03G0537800		GO:0003677	DNA binding	Any molecular function by which a gene product interacts selectively and non-covalently with DNA (deoxyribonucleic acid).		F
EnsemblPlants Rel 51	TraesCS1A02G201200	TraesCS1A03G0537900		GO:0016021	integral component of membrane	The component of a membrane consisting of the gene products and protein complexes having at least some part of their peptide sequence embedded in the hydrophobic region of the membrane.		C
EnsemblPlants Rel 51	TraesCS1A02G201700	TraesCS1A03G0539100		GO:0016021	integral component of membrane	The component of a membrane consisting of the gene products and protein complexes having at least some part of their peptide sequence embedded in the hydrophobic region of the membrane.		C
EnsemblPlants Rel 51	TraesCS1A02G202500	TraesCS1A03G0540300		GO:0003677	DNA binding	Any molecular function by which a gene product interacts selectively and non-covalently with DNA (deoxyribonucleic acid).		F
EnsemblPlants Rel 51	TraesCS1A02G202800	TraesCS1A03G0540800		GO:0005515	protein binding	Interacting selectively and non-covalently with any protein or protein complex (a complex of two or more proteins that may include other nonprotein molecules).		F
EnsemblPlants Rel 51	TraesCS1A02G203200	TraesCS1A03G0541600		GO:0005576	extracellular region	The space external to the outermost structure of a cell. For cells without external protective or external encapsulating structures this refers to space outside of the plasma membrane. This term covers the host cell environment outside an intracellular parasite.		C
EnsemblPlants Rel 51	TraesCS1A02G203500	TraesCS1A03G0542300		GO:0005515	protein binding	Interacting selectively and non-covalently with any protein or protein complex (a complex of two or more proteins that may include other nonprotein molecules).		F
EnsemblPlants Rel 51	TraesCS1A02G204200	TraesCS1A03G0544000		GO:0005515	protein binding	Interacting selectively and non-covalently with any protein or protein complex (a complex of two or more proteins that may include other nonprotein molecules).		F
EnsemblPlants Rel 51	TraesCS1A02G204400	TraesCS1A03G0544300		GO:0005515	protein binding	Interacting selectively and non-covalently with any protein or protein complex (a complex of two or more proteins that may include other nonprotein molecules).		F
EnsemblPlants Rel 51	TraesCS1A02G207000	TraesCS1A03G0548400		GO:0016021	integral component of membrane	The component of a membrane consisting of the gene products and protein complexes having at least some part of their peptide sequence embedded in the hydrophobic region of the membrane.		C
EnsemblPlants Rel 51	TraesCS1A02G207200	TraesCS1A03G0548800		GO:0016021	integral component of membrane	The component of a membrane consisting of the gene products and protein complexes having at least some part of their peptide sequence embedded in the hydrophobic region of the membrane.		C
EnsemblPlants Rel 51	TraesCS1A02G207500	TraesCS1A03G0549800		GO:0055114	oxidation-reduction process	A metabolic process that results in the removal or addition of one or more electrons to or from a substance, with or without the concomitant removal or addition of a proton or protons.		P
EnsemblPlants Rel 51	TraesCS1A02G207600	TraesCS1A03G0549900		GO:0016021	integral component of membrane	The component of a membrane consisting of the gene products and protein complexes having at least some part of their peptide sequence embedded in the hydrophobic region of the membrane.		C
EnsemblPlants Rel 51	TraesCS1A02G208700	TraesCS1A03G0551500		GO:0005089	Rho guanyl-nucleotide exchange factor activity	Stimulates the exchange of guanyl nucleotides associated with a GTPase of the Rho family. Under normal cellular physiological conditions, the concentration of GTP is higher than that of GDP, favoring the replacement of GDP by GTP in association with the GTPase.		F
EnsemblPlants Rel 51	TraesCS1A02G209500	TraesCS1A03G0554100		GO:1900034	regulation of cellular response to heat	Any process that modulates the frequency, rate or extent of cellular response to heat.		P
EnsemblPlants Rel 51	TraesCS1A02G210800	TraesCS1A03G0556000		GO:0008289	lipid binding	Interacting selectively and non-covalently with a lipid.		F
EnsemblPlants Rel 51	TraesCS1A02G211500	TraesCS1A03G0557300		GO:0016021	integral component of membrane	The component of a membrane consisting of the gene products and protein complexes having at least some part of their peptide sequence embedded in the hydrophobic region of the membrane.		C
EnsemblPlants Rel 51	TraesCS1A02G212700	TraesCS1A03G0559700		GO:0046983	protein dimerization activity	The formation of a protein dimer, a macromolecular structure consists of two noncovalently associated identical or nonidentical subunits.		F
EnsemblPlants Rel 51	TraesCS1A02G213100	TraesCS1A03G0560900		GO:0032981	mitochondrial respiratory chain complex I assembly	The aggregation, arrangement and bonding together of a set of components to form mitochondrial respiratory chain complex I.		P
EnsemblPlants Rel 51	TraesCS1A02G213600	TraesCS1A03G0561600		GO:0016787	hydrolase activity	Catalysis of the hydrolysis of various bonds, e.g. C-O, C-N, C-C, phosphoric anhydride bonds, etc. Hydrolase is the systematic name for any enzyme of EC class 3.		F
EnsemblPlants Rel 51	TraesCS1A02G214316	TraesCS1A03G0563300		GO:0005515	protein binding	Interacting selectively and non-covalently with any protein or protein complex (a complex of two or more proteins that may include other nonprotein molecules).		F
EnsemblPlants Rel 51	TraesCS1A02G215100	TraesCS1A03G0567100		GO:0016021	integral component of membrane	The component of a membrane consisting of the gene products and protein complexes having at least some part of their peptide sequence embedded in the hydrophobic region of the membrane.		C
EnsemblPlants Rel 51	TraesCS1A02G215800	TraesCS1A03G0568900	Calcineurin B-like protein 1 [Source:UniProtKB/TrEMBL;Acc:V9LSK3]	GO:0005509	calcium ion binding	Interacting selectively and non-covalently with calcium ions (Ca2+).		F
EnsemblPlants Rel 51	TraesCS1A02G216600	TraesCS1A03G0571600		GO:0071949	FAD binding	Interacting selectively and non-covalently with the oxidized form, FAD, of flavin-adenine dinucleotide, the coenzyme or the prosthetic group of various flavoprotein oxidoreductase enzymes.		F
EnsemblPlants Rel 51	TraesCS1A02G217100	TraesCS1A03G0572300	PRA1 family protein [Source:UniProtKB/TrEMBL;Acc:A0A1D5RUP1]	GO:0016021	integral component of membrane	The component of a membrane consisting of the gene products and protein complexes having at least some part of their peptide sequence embedded in the hydrophobic region of the membrane.		C
EnsemblPlants Rel 51	TraesCS1A02G217800	TraesCS1A03G0573200		GO:0005515	protein binding	Interacting selectively and non-covalently with any protein or protein complex (a complex of two or more proteins that may include other nonprotein molecules).		F
EnsemblPlants Rel 51	TraesCS1A02G217900	TraesCS1A03G0573400		GO:0005515	protein binding	Interacting selectively and non-covalently with any protein or protein complex (a complex of two or more proteins that may include other nonprotein molecules).		F
EnsemblPlants Rel 51	TraesCS1A02G218000	TraesCS1A03G0573800		GO:0098599	palmitoyl hydrolase activity	Catalysis of a hydrolase reaction that removes a palmitoyl moiety from some substrate.		F
EnsemblPlants Rel 51	TraesCS1A02G218300	TraesCS1A03G0574300		GO:0010091	trichome branching	Any process involved in the formation of branches in plant hair cells. An example of this process is found in Arabidopsis thaliana.		P
EnsemblPlants Rel 51	TraesCS1A02G219300	TraesCS1A03G0576100		GO:0003677	DNA binding	Any molecular function by which a gene product interacts selectively and non-covalently with DNA (deoxyribonucleic acid).		F
EnsemblPlants Rel 51	TraesCS1A02G220100	TraesCS1A03G0577100		GO:0016021	integral component of membrane	The component of a membrane consisting of the gene products and protein complexes having at least some part of their peptide sequence embedded in the hydrophobic region of the membrane.		C
EnsemblPlants Rel 51	TraesCS1A02G220600	TraesCS1A03G0577800		GO:0016746	transferase activity, transferring acyl groups	Catalysis of the transfer of an acyl group from one compound (donor) to another (acceptor).		F
EnsemblPlants Rel 51	TraesCS1A02G221300	TraesCS1A03G0578700		GO:0005515	protein binding	Interacting selectively and non-covalently with any protein or protein complex (a complex of two or more proteins that may include other nonprotein molecules).		F
EnsemblPlants Rel 51	TraesCS1A02G221700	TraesCS1A03G0579500		GO:0016021	integral component of membrane	The component of a membrane consisting of the gene products and protein complexes having at least some part of their peptide sequence embedded in the hydrophobic region of the membrane.		C
EnsemblPlants Rel 51	TraesCS1A02G221800	TraesCS1A03G0580000		GO:0035091	phosphatidylinositol binding	Interacting selectively and non-covalently with any inositol-containing glycerophospholipid, i.e. phosphatidylinositol (PtdIns) and its phosphorylated derivatives.		F
EnsemblPlants Rel 51	TraesCS1A02G223200	TraesCS1A03G0584300	SAGA-associated factor 11 [Source:UniProtKB/TrEMBL;Acc:W4ZRY4]	GO:0005634	nucleus	A membrane-bounded organelle of eukaryotic cells in which chromosomes are housed and replicated. In most cells, the nucleus contains all of the cell's chromosomes except the organellar chromosomes, and is the site of RNA synthesis and processing. In some species, or in specialized cell types, RNA metabolism or DNA replication may be absent.		C
EnsemblPlants Rel 51	TraesCS1A02G223600	TraesCS1A03G0585500		GO:0003677	DNA binding	Any molecular function by which a gene product interacts selectively and non-covalently with DNA (deoxyribonucleic acid).		F
EnsemblPlants Rel 51	TraesCS1A02G223900	TraesCS1A03G0585800		GO:0003676	nucleic acid binding	Interacting selectively and non-covalently with any nucleic acid.		F
EnsemblPlants Rel 51	TraesCS1A02G225100	TraesCS1A03G0587900		GO:0005680	anaphase-promoting complex	A ubiquitin ligase complex that degrades mitotic cyclins and anaphase inhibitory protein, thereby triggering sister chromatid separation and exit from mitosis. Substrate recognition by APC occurs through degradation signals, the most common of which is termed the Dbox degradation motif, originally discovered in cyclin B.		C
EnsemblPlants Rel 51	TraesCS1A02G225200	TraesCS1A03G0588000		GO:0016021	integral component of membrane	The component of a membrane consisting of the gene products and protein complexes having at least some part of their peptide sequence embedded in the hydrophobic region of the membrane.		C
EnsemblPlants Rel 51	TraesCS1A02G225600	TraesCS1A03G0588700		GO:0005515	protein binding	Interacting selectively and non-covalently with any protein or protein complex (a complex of two or more proteins that may include other nonprotein molecules).		F
EnsemblPlants Rel 51	TraesCS1A02G225800	TraesCS1A03G0589000		GO:0046872	metal ion binding	Interacting selectively and non-covalently with any metal ion.		F
EnsemblPlants Rel 51	TraesCS1A02G225900	TraesCS1A03G0589200		GO:0046872	metal ion binding	Interacting selectively and non-covalently with any metal ion.		F
EnsemblPlants Rel 51	TraesCS1A02G226100	TraesCS1A03G0589500		GO:0005515	protein binding	Interacting selectively and non-covalently with any protein or protein complex (a complex of two or more proteins that may include other nonprotein molecules).		F
EnsemblPlants Rel 51	TraesCS1A02G226700	TraesCS1A03G0590400		GO:0016021	integral component of membrane	The component of a membrane consisting of the gene products and protein complexes having at least some part of their peptide sequence embedded in the hydrophobic region of the membrane.		C
EnsemblPlants Rel 51	TraesCS1A02G227400	TraesCS1A03G0592500		GO:0005515	protein binding	Interacting selectively and non-covalently with any protein or protein complex (a complex of two or more proteins that may include other nonprotein molecules).		F
EnsemblPlants Rel 51	TraesCS1A02G227500	TraesCS1A03G0592600		GO:0005515	protein binding	Interacting selectively and non-covalently with any protein or protein complex (a complex of two or more proteins that may include other nonprotein molecules).		F
EnsemblPlants Rel 51	TraesCS1A02G228500	TraesCS1A03G0594300		GO:0016021	integral component of membrane	The component of a membrane consisting of the gene products and protein complexes having at least some part of their peptide sequence embedded in the hydrophobic region of the membrane.		C
EnsemblPlants Rel 51	TraesCS1A02G229800	TraesCS1A03G0597200		GO:0005515	protein binding	Interacting selectively and non-covalently with any protein or protein complex (a complex of two or more proteins that may include other nonprotein molecules).		F
EnsemblPlants Rel 51	TraesCS1A02G230000	TraesCS1A03G0597500	Chaperone protein dnaJ 49 [Source:Projected from Arabidopsis thaliana (AT5G49060) UniProtKB/Swiss-Prot;Acc:Q9FH28]	GO:0016021	integral component of membrane	The component of a membrane consisting of the gene products and protein complexes having at least some part of their peptide sequence embedded in the hydrophobic region of the membrane.		C
EnsemblPlants Rel 51	TraesCS1A02G230300	TraesCS1A03G0598300		GO:0005515	protein binding	Interacting selectively and non-covalently with any protein or protein complex (a complex of two or more proteins that may include other nonprotein molecules).		F
EnsemblPlants Rel 51	TraesCS1A02G230400	TraesCS1A03G0598600		GO:0016021	integral component of membrane	The component of a membrane consisting of the gene products and protein complexes having at least some part of their peptide sequence embedded in the hydrophobic region of the membrane.		C
EnsemblPlants Rel 51	TraesCS1A02G231600	TraesCS1A03G0601800		GO:0004857	enzyme inhibitor activity	Binds to and stops, prevents or reduces the activity of an enzyme.		F
EnsemblPlants Rel 51	TraesCS1A02G231700	TraesCS1A03G0602000		GO:0016021	integral component of membrane	The component of a membrane consisting of the gene products and protein complexes having at least some part of their peptide sequence embedded in the hydrophobic region of the membrane.		C
EnsemblPlants Rel 51	TraesCS1A02G231900	TraesCS1A03G0602500		GO:0070569	uridylyltransferase activity	Catalysis of the transfer of an uridylyl group to an acceptor.		F
EnsemblPlants Rel 51	TraesCS1A02G232300	TraesCS1A03G0603100		GO:0005515	protein binding	Interacting selectively and non-covalently with any protein or protein complex (a complex of two or more proteins that may include other nonprotein molecules).		F
EnsemblPlants Rel 51	TraesCS1A02G232400	TraesCS1A03G0603200		GO:0005515	protein binding	Interacting selectively and non-covalently with any protein or protein complex (a complex of two or more proteins that may include other nonprotein molecules).		F
EnsemblPlants Rel 51	TraesCS1A02G232500	TraesCS1A03G0603300		GO:0010112	regulation of systemic acquired resistance	Any process that modulates the frequency, rate or extent of systemic acquired resistance.		P
EnsemblPlants Rel 51	TraesCS1A02G232600	TraesCS1A03G0603400		GO:0010112	regulation of systemic acquired resistance	Any process that modulates the frequency, rate or extent of systemic acquired resistance.		P
EnsemblPlants Rel 51	TraesCS1A02G233500	TraesCS1A03G0605600		GO:0008168	methyltransferase activity	Catalysis of the transfer of a methyl group to an acceptor molecule.		F
EnsemblPlants Rel 51	TraesCS1A02G233700	TraesCS1A03G0606500	Acyl carrier protein [Source:UniProtKB/TrEMBL;Acc:W4ZSS8]	GO:0006633	fatty acid biosynthetic process	The chemical reactions and pathways resulting in the formation of a fatty acid, any of the aliphatic monocarboxylic acids that can be liberated by hydrolysis from naturally occurring fats and oils. Fatty acids are predominantly straight-chain acids of 4 to 24 carbon atoms, which may be saturated or unsaturated; branched fatty acids and hydroxy fatty acids also occur, and very long chain acids of …		P
EnsemblPlants Rel 51	TraesCS1A02G234900	TraesCS1A03G0610200		GO:0005515	protein binding	Interacting selectively and non-covalently with any protein or protein complex (a complex of two or more proteins that may include other nonprotein molecules).		F
EnsemblPlants Rel 51	TraesCS1A02G235500	TraesCS1A03G0612400		GO:0003676	nucleic acid binding	Interacting selectively and non-covalently with any nucleic acid.		F
EnsemblPlants Rel 51	TraesCS1A02G236300	TraesCS1A03G0614900		GO:0016021	integral component of membrane	The component of a membrane consisting of the gene products and protein complexes having at least some part of their peptide sequence embedded in the hydrophobic region of the membrane.		C
EnsemblPlants Rel 51	TraesCS1A02G237200	TraesCS1A03G0617700		GO:0008270	zinc ion binding	Interacting selectively and non-covalently with zinc (Zn) ions.		F
EnsemblPlants Rel 51	TraesCS1A02G237800	TraesCS1A03G0619000		GO:0016021	integral component of membrane	The component of a membrane consisting of the gene products and protein complexes having at least some part of their peptide sequence embedded in the hydrophobic region of the membrane.		C
EnsemblPlants Rel 51	TraesCS1A02G238500	TraesCS1A03G0620600		GO:0005509	calcium ion binding	Interacting selectively and non-covalently with calcium ions (Ca2+).		F
EnsemblPlants Rel 51	TraesCS1A02G238800	TraesCS1A03G0621900		GO:0005509	calcium ion binding	Interacting selectively and non-covalently with calcium ions (Ca2+).		F
EnsemblPlants Rel 51	TraesCS1A02G239000	TraesCS1A03G0622400		GO:0016021	integral component of membrane	The component of a membrane consisting of the gene products and protein complexes having at least some part of their peptide sequence embedded in the hydrophobic region of the membrane.		C
EnsemblPlants Rel 51	TraesCS1A02G239100	TraesCS1A03G0622500		GO:0005516	calmodulin binding	Interacting selectively and non-covalently with calmodulin, a calcium-binding protein with many roles, both in the calcium-bound and calcium-free states.		F
EnsemblPlants Rel 51	TraesCS1A02G239200	TraesCS1A03G0622600	Probable ADP-ribosylation factor GTPase-activating protein AGD11 [Source:Projected from Arabidopsis thaliana (AT3G07940) UniProtKB/Swiss-Prot;Acc:Q8L7A4]	GO:0005096	GTPase activator activity	Binds to and increases the activity of a GTPase, an enzyme that catalyzes the hydrolysis of GTP.		F
EnsemblPlants Rel 51	TraesCS1A02G240600	TraesCS1A03G0624800		GO:0046872	metal ion binding	Interacting selectively and non-covalently with any metal ion.		F
EnsemblPlants Rel 51	TraesCS1A02G241300	TraesCS1A03G0626000		GO:0016021	integral component of membrane	The component of a membrane consisting of the gene products and protein complexes having at least some part of their peptide sequence embedded in the hydrophobic region of the membrane.		C
EnsemblPlants Rel 51	TraesCS1A02G241500	TraesCS1A03G0626300		GO:0003682	chromatin binding	Interacting selectively and non-covalently with chromatin, the network of fibers of DNA, protein, and sometimes RNA, that make up the chromosomes of the eukaryotic nucleus during interphase.		F
EnsemblPlants Rel 51	TraesCS1A02G242300	TraesCS1A03G0627700		GO:0043531	ADP binding	Interacting selectively and non-covalently with ADP, adenosine 5'-diphosphate.		F
EnsemblPlants Rel 51	TraesCS1A02G243000	TraesCS1A03G0628800		GO:0016021	integral component of membrane	The component of a membrane consisting of the gene products and protein complexes having at least some part of their peptide sequence embedded in the hydrophobic region of the membrane.		C
EnsemblPlants Rel 51	TraesCS1A02G243500	TraesCS1A03G0629800		GO:0006629	lipid metabolic process	The chemical reactions and pathways involving lipids, compounds soluble in an organic solvent but not, or sparingly, in an aqueous solvent. Includes fatty acids; neutral fats, other fatty-acid esters, and soaps; long-chain (fatty) alcohols and waxes; sphingoids and other long-chain bases; glycolipids, phospholipids and sphingolipids; and carotenes, polyprenols, sterols, terpenes and other isopren…		P
EnsemblPlants Rel 51	TraesCS1A02G244900	TraesCS1A03G0632500		GO:0016757	transferase activity, transferring glycosyl groups	Catalysis of the transfer of a glycosyl group from one compound (donor) to another (acceptor).		F
EnsemblPlants Rel 51	TraesCS1A02G245500	TraesCS1A03G0634400		GO:0008168	methyltransferase activity	Catalysis of the transfer of a methyl group to an acceptor molecule.		F
EnsemblPlants Rel 51	TraesCS1A02G245700	TraesCS1A03G0634700		GO:0005524	ATP binding	Interacting selectively and non-covalently with ATP, adenosine 5'-triphosphate, a universally important coenzyme and enzyme regulator.		F
EnsemblPlants Rel 51	TraesCS1A02G246100	TraesCS1A03G0636200		GO:0005515	protein binding	Interacting selectively and non-covalently with any protein or protein complex (a complex of two or more proteins that may include other nonprotein molecules).		F
EnsemblPlants Rel 51	TraesCS1A02G246400	TraesCS1A03G0637300		GO:0016021	integral component of membrane	The component of a membrane consisting of the gene products and protein complexes having at least some part of their peptide sequence embedded in the hydrophobic region of the membrane.		C
EnsemblPlants Rel 51	TraesCS1A02G247300	TraesCS1A03G0640200		GO:0016020	membrane	A lipid bilayer along with all the proteins and protein complexes embedded in it an attached to it.		C
EnsemblPlants Rel 51	TraesCS1A02G247400	TraesCS1A03G0640300		GO:0005515	protein binding	Interacting selectively and non-covalently with any protein or protein complex (a complex of two or more proteins that may include other nonprotein molecules).		F
EnsemblPlants Rel 51	TraesCS1A02G247800	TraesCS1A03G0641800		GO:0005773	vacuole	A closed structure, found only in eukaryotic cells, that is completely surrounded by unit membrane and contains liquid material. Cells contain one or several vacuoles, that may have different functions from each other. Vacuoles have a diverse array of functions. They can act as a storage organelle for nutrients or waste products, as a degradative compartment, as a cost-effective way of increasing…		C
EnsemblPlants Rel 51	TraesCS1A02G247900	TraesCS1A03G0642300		GO:0016021	integral component of membrane	The component of a membrane consisting of the gene products and protein complexes having at least some part of their peptide sequence embedded in the hydrophobic region of the membrane.		C
EnsemblPlants Rel 51	TraesCS1A02G248900	TraesCS1A03G0644900		GO:0009507	chloroplast	A chlorophyll-containing plastid with thylakoids organized into grana and frets, or stroma thylakoids, and embedded in a stroma.		C
EnsemblPlants Rel 51	TraesCS1A02G249200	TraesCS1A03G0645300		GO:0005515	protein binding	Interacting selectively and non-covalently with any protein or protein complex (a complex of two or more proteins that may include other nonprotein molecules).		F
EnsemblPlants Rel 51	TraesCS1A02G249400	TraesCS1A03G0645500		GO:0005515	protein binding	Interacting selectively and non-covalently with any protein or protein complex (a complex of two or more proteins that may include other nonprotein molecules).		F
EnsemblPlants Rel 51	TraesCS1A02G249600	TraesCS1A03G0645900		GO:0016787	hydrolase activity	Catalysis of the hydrolysis of various bonds, e.g. C-O, C-N, C-C, phosphoric anhydride bonds, etc. Hydrolase is the systematic name for any enzyme of EC class 3.		F
EnsemblPlants Rel 51	TraesCS1A02G249700	TraesCS1A03G0646000		GO:0016787	hydrolase activity	Catalysis of the hydrolysis of various bonds, e.g. C-O, C-N, C-C, phosphoric anhydride bonds, etc. Hydrolase is the systematic name for any enzyme of EC class 3.		F
EnsemblPlants Rel 51	TraesCS1A02G249800	TraesCS1A03G0646100		GO:0016787	hydrolase activity	Catalysis of the hydrolysis of various bonds, e.g. C-O, C-N, C-C, phosphoric anhydride bonds, etc. Hydrolase is the systematic name for any enzyme of EC class 3.		F
EnsemblPlants Rel 51	TraesCS1A02G249900	TraesCS1A03G0646200		GO:0016787	hydrolase activity	Catalysis of the hydrolysis of various bonds, e.g. C-O, C-N, C-C, phosphoric anhydride bonds, etc. Hydrolase is the systematic name for any enzyme of EC class 3.		F
EnsemblPlants Rel 51	TraesCS1A02G250100	TraesCS1A03G0646500		GO:0016787	hydrolase activity	Catalysis of the hydrolysis of various bonds, e.g. C-O, C-N, C-C, phosphoric anhydride bonds, etc. Hydrolase is the systematic name for any enzyme of EC class 3.		F
EnsemblPlants Rel 51	TraesCS1A02G250200	TraesCS1A03G0646600	Sulfotransferase [Source:UniProtKB/TrEMBL;Acc:A0A1D5S065]	GO:0008146	sulfotransferase activity	Catalysis of the transfer of a sulfate group from 3'-phosphoadenosine 5'-phosphosulfate to the hydroxyl group of an acceptor, producing the sulfated derivative and 3'-phosphoadenosine 5'-phosphate.		F
EnsemblPlants Rel 51	TraesCS1A02G250500	TraesCS1A03G0647000		GO:0016021	integral component of membrane	The component of a membrane consisting of the gene products and protein complexes having at least some part of their peptide sequence embedded in the hydrophobic region of the membrane.		C
EnsemblPlants Rel 51	TraesCS1A02G250600	TraesCS1A03G0647100		GO:0016788	hydrolase activity, acting on ester bonds	Catalysis of the hydrolysis of any ester bond.		F
EnsemblPlants Rel 51	TraesCS1A02G251100	TraesCS1A03G0648300		GO:0016788	hydrolase activity, acting on ester bonds	Catalysis of the hydrolysis of any ester bond.		F
EnsemblPlants Rel 51	TraesCS1A02G251200	TraesCS1A03G0648400		GO:0016021	integral component of membrane	The component of a membrane consisting of the gene products and protein complexes having at least some part of their peptide sequence embedded in the hydrophobic region of the membrane.		C
EnsemblPlants Rel 51	TraesCS1A02G251600	TraesCS1A03G0649000	BI1-like protein [Source:Projected from Arabidopsis thaliana (AT4G15470) UniProtKB/Swiss-Prot;Acc:Q94A20]	GO:0016021	integral component of membrane	The component of a membrane consisting of the gene products and protein complexes having at least some part of their peptide sequence embedded in the hydrophobic region of the membrane.		C
EnsemblPlants Rel 51	TraesCS1A02G252100	TraesCS1A03G0650200		GO:0003677	DNA binding	Any molecular function by which a gene product interacts selectively and non-covalently with DNA (deoxyribonucleic acid).		F
EnsemblPlants Rel 51	TraesCS1A02G252600	TraesCS1A03G0650700		GO:0003677	DNA binding	Any molecular function by which a gene product interacts selectively and non-covalently with DNA (deoxyribonucleic acid).		F
EnsemblPlants Rel 51	TraesCS1A02G252700	TraesCS1A03G0650800		GO:0016021	integral component of membrane	The component of a membrane consisting of the gene products and protein complexes having at least some part of their peptide sequence embedded in the hydrophobic region of the membrane.		C
EnsemblPlants Rel 51	TraesCS1A02G254200	TraesCS1A03G0653300		GO:0005515	protein binding	Interacting selectively and non-covalently with any protein or protein complex (a complex of two or more proteins that may include other nonprotein molecules).		F
EnsemblPlants Rel 51	TraesCS1A02G254800	TraesCS1A03G0654900		GO:0005515	protein binding	Interacting selectively and non-covalently with any protein or protein complex (a complex of two or more proteins that may include other nonprotein molecules).		F
EnsemblPlants Rel 51	TraesCS1A02G255000	TraesCS1A03G0655700		GO:0005515	protein binding	Interacting selectively and non-covalently with any protein or protein complex (a complex of two or more proteins that may include other nonprotein molecules).		F
EnsemblPlants Rel 51	TraesCS1A02G255200	TraesCS1A03G0656100		GO:0005515	protein binding	Interacting selectively and non-covalently with any protein or protein complex (a complex of two or more proteins that may include other nonprotein molecules).		F
EnsemblPlants Rel 51	TraesCS1A02G255900	TraesCS1A03G0657200		GO:0005515	protein binding	Interacting selectively and non-covalently with any protein or protein complex (a complex of two or more proteins that may include other nonprotein molecules).		F
EnsemblPlants Rel 51	TraesCS1A02G256000	TraesCS1A03G0657400		GO:0030247	polysaccharide binding	Interacting selectively and non-covalently with any polysaccharide, a polymer of many (typically more than 10) monosaccharide residues linked glycosidically.		F
EnsemblPlants Rel 51	TraesCS1A02G256200	TraesCS1A03G0657700		GO:0005515	protein binding	Interacting selectively and non-covalently with any protein or protein complex (a complex of two or more proteins that may include other nonprotein molecules).		F
EnsemblPlants Rel 51	TraesCS1A02G256300	TraesCS1A03G0657800		GO:0043130	ubiquitin binding	Interacting selectively and non-covalently with ubiquitin, a protein that when covalently bound to other cellular proteins marks them for proteolytic degradation.		F
EnsemblPlants Rel 51	TraesCS1A02G256400	TraesCS1A03G0657900	Cysteine proteinase inhibitor [Source:UniProtKB/TrEMBL;Acc:A0A1D5RVX3]	GO:0004869	cysteine-type endopeptidase inhibitor activity	Stops, prevents or reduces the activity of a cysteine-type endopeptidase, any enzyme that hydrolyzes peptide bonds in polypeptides by a mechanism in which the sulfhydryl group of a cysteine residue at the active center acts as a nucleophile.		F
EnsemblPlants Rel 51	TraesCS1A02G256900	TraesCS1A03G0659400		GO:0005515	protein binding	Interacting selectively and non-covalently with any protein or protein complex (a complex of two or more proteins that may include other nonprotein molecules).		F
EnsemblPlants Rel 51	TraesCS1A02G257000	TraesCS1A03G0659500		GO:0016787	hydrolase activity	Catalysis of the hydrolysis of various bonds, e.g. C-O, C-N, C-C, phosphoric anhydride bonds, etc. Hydrolase is the systematic name for any enzyme of EC class 3.		F
EnsemblPlants Rel 51	TraesCS1A02G257300	TraesCS1A03G0660000		GO:0016757	transferase activity, transferring glycosyl groups	Catalysis of the transfer of a glycosyl group from one compound (donor) to another (acceptor).		F
EnsemblPlants Rel 51	TraesCS1A02G257500	TraesCS1A03G0660500		GO:0016787	hydrolase activity	Catalysis of the hydrolysis of various bonds, e.g. C-O, C-N, C-C, phosphoric anhydride bonds, etc. Hydrolase is the systematic name for any enzyme of EC class 3.		F
EnsemblPlants Rel 51	TraesCS1A02G257600	TraesCS1A03G0660700		GO:0005515	protein binding	Interacting selectively and non-covalently with any protein or protein complex (a complex of two or more proteins that may include other nonprotein molecules).		F
EnsemblPlants Rel 51	TraesCS1A02G257700	TraesCS1A03G0660800		GO:0005515	protein binding	Interacting selectively and non-covalently with any protein or protein complex (a complex of two or more proteins that may include other nonprotein molecules).		F
EnsemblPlants Rel 51	TraesCS1A02G258000	TraesCS1A03G0661500		GO:0071949	FAD binding	Interacting selectively and non-covalently with the oxidized form, FAD, of flavin-adenine dinucleotide, the coenzyme or the prosthetic group of various flavoprotein oxidoreductase enzymes.		F
EnsemblPlants Rel 51	TraesCS1A02G258200	TraesCS1A03G0661700		GO:0003676	nucleic acid binding	Interacting selectively and non-covalently with any nucleic acid.		F
EnsemblPlants Rel 51	TraesCS1A02G259200	TraesCS1A03G0663500		GO:0005634	nucleus	A membrane-bounded organelle of eukaryotic cells in which chromosomes are housed and replicated. In most cells, the nucleus contains all of the cell's chromosomes except the organellar chromosomes, and is the site of RNA synthesis and processing. In some species, or in specialized cell types, RNA metabolism or DNA replication may be absent.		C
EnsemblPlants Rel 51	TraesCS1A02G259300	TraesCS1A03G0663600		GO:0005515	protein binding	Interacting selectively and non-covalently with any protein or protein complex (a complex of two or more proteins that may include other nonprotein molecules).		F
EnsemblPlants Rel 51	TraesCS1A02G259400	TraesCS1A03G0663800		GO:0005515	protein binding	Interacting selectively and non-covalently with any protein or protein complex (a complex of two or more proteins that may include other nonprotein molecules).		F
EnsemblPlants Rel 51	TraesCS1A02G259500	TraesCS1A03G0664000		GO:0043531	ADP binding	Interacting selectively and non-covalently with ADP, adenosine 5'-diphosphate.		F
EnsemblPlants Rel 51	TraesCS1A02G261100	TraesCS1A03G0667900		GO:0005515	protein binding	Interacting selectively and non-covalently with any protein or protein complex (a complex of two or more proteins that may include other nonprotein molecules).		F
EnsemblPlants Rel 51	TraesCS1A02G261200	TraesCS1A03G0668000		GO:0005509	calcium ion binding	Interacting selectively and non-covalently with calcium ions (Ca2+).		F
EnsemblPlants Rel 51	TraesCS1A02G261300	TraesCS1A03G0668100		GO:0016788	hydrolase activity, acting on ester bonds	Catalysis of the hydrolysis of any ester bond.		F
EnsemblPlants Rel 51	TraesCS1A02G261500	TraesCS1A03G0668400		GO:0016021	integral component of membrane	The component of a membrane consisting of the gene products and protein complexes having at least some part of their peptide sequence embedded in the hydrophobic region of the membrane.		C
EnsemblPlants Rel 51	TraesCS1A02G262900	TraesCS1A03G0670600		GO:0016788	hydrolase activity, acting on ester bonds	Catalysis of the hydrolysis of any ester bond.		F
EnsemblPlants Rel 51	TraesCS1A02G263800	TraesCS1A03G0672500		GO:0005515	protein binding	Interacting selectively and non-covalently with any protein or protein complex (a complex of two or more proteins that may include other nonprotein molecules).		F
EnsemblPlants Rel 51	TraesCS1A02G264500	TraesCS1A03G0673800		GO:0016021	integral component of membrane	The component of a membrane consisting of the gene products and protein complexes having at least some part of their peptide sequence embedded in the hydrophobic region of the membrane.		C
EnsemblPlants Rel 51	TraesCS1A02G264900	TraesCS1A03G0674400		GO:0005515	protein binding	Interacting selectively and non-covalently with any protein or protein complex (a complex of two or more proteins that may include other nonprotein molecules).		F
EnsemblPlants Rel 51	TraesCS1A02G265100	TraesCS1A03G0674600	Dirigent protein [Source:UniProtKB/TrEMBL;Acc:W4ZNX8]	GO:0048046	apoplast	The cell membranes and intracellular regions in a plant are connected through plasmodesmata, and plants may be described as having two major compartments: the living symplast and the non-living apoplast. The apoplast is external to the plasma membrane and includes cell walls, intercellular spaces and the lumen of dead structures such as xylem vessels. Water and solutes pass freely through it.		C
EnsemblPlants Rel 51	TraesCS1A02G266500	TraesCS1A03G0677600		GO:0016021	integral component of membrane	The component of a membrane consisting of the gene products and protein complexes having at least some part of their peptide sequence embedded in the hydrophobic region of the membrane.		C
EnsemblPlants Rel 51	TraesCS1A02G266900	TraesCS1A03G0678900		GO:0005515	protein binding	Interacting selectively and non-covalently with any protein or protein complex (a complex of two or more proteins that may include other nonprotein molecules).		F
EnsemblPlants Rel 51	TraesCS1A02G267100	TraesCS1A03G0679300		GO:0043531	ADP binding	Interacting selectively and non-covalently with ADP, adenosine 5'-diphosphate.		F
EnsemblPlants Rel 51	TraesCS1A02G268600	TraesCS1A03G0681800		GO:0016787	hydrolase activity	Catalysis of the hydrolysis of various bonds, e.g. C-O, C-N, C-C, phosphoric anhydride bonds, etc. Hydrolase is the systematic name for any enzyme of EC class 3.		F
EnsemblPlants Rel 51	TraesCS1A02G268700	TraesCS1A03G0681900		GO:0016021	integral component of membrane	The component of a membrane consisting of the gene products and protein complexes having at least some part of their peptide sequence embedded in the hydrophobic region of the membrane.		C
EnsemblPlants Rel 51	TraesCS1A02G268800	TraesCS1A03G0682100		GO:0003677	DNA binding	Any molecular function by which a gene product interacts selectively and non-covalently with DNA (deoxyribonucleic acid).		F
EnsemblPlants Rel 51	TraesCS1A02G269100	TraesCS1A03G0682400		GO:0045927	positive regulation of growth	Any process that activates or increases the rate or extent of growth, the increase in size or mass of all or part of an organism.		P
EnsemblPlants Rel 51	TraesCS1A02G269900	TraesCS1A03G0684100		GO:0003677	DNA binding	Any molecular function by which a gene product interacts selectively and non-covalently with DNA (deoxyribonucleic acid).		F
EnsemblPlants Rel 51	TraesCS1A02G270000	TraesCS1A03G0684200	Transferase family protein [Source: Projected from Oryza sativa (Os10g0195600)]	GO:0016747	transferase activity, transferring acyl groups other than amino-acyl groups	Catalysis of the transfer of an acyl group, other than amino-acyl, from one compound (donor) to another (acceptor).		F
EnsemblPlants Rel 51	TraesCS1A02G270500	TraesCS1A03G0685200		GO:0016021	integral component of membrane	The component of a membrane consisting of the gene products and protein complexes having at least some part of their peptide sequence embedded in the hydrophobic region of the membrane.		C
EnsemblPlants Rel 51	TraesCS1A02G270600	TraesCS1A03G0685300		GO:0016021	integral component of membrane	The component of a membrane consisting of the gene products and protein complexes having at least some part of their peptide sequence embedded in the hydrophobic region of the membrane.		C
EnsemblPlants Rel 51	TraesCS1A02G271000	TraesCS1A03G0685800		GO:0016021	integral component of membrane	The component of a membrane consisting of the gene products and protein complexes having at least some part of their peptide sequence embedded in the hydrophobic region of the membrane.		C
EnsemblPlants Rel 51	TraesCS1A02G271100	TraesCS1A03G0686100		GO:0016021	integral component of membrane	The component of a membrane consisting of the gene products and protein complexes having at least some part of their peptide sequence embedded in the hydrophobic region of the membrane.		C
EnsemblPlants Rel 51	TraesCS1A02G271300	TraesCS1A03G0686400		GO:0016021	integral component of membrane	The component of a membrane consisting of the gene products and protein complexes having at least some part of their peptide sequence embedded in the hydrophobic region of the membrane.		C
EnsemblPlants Rel 51	TraesCS1A02G271400	TraesCS1A03G0686500		GO:0016021	integral component of membrane	The component of a membrane consisting of the gene products and protein complexes having at least some part of their peptide sequence embedded in the hydrophobic region of the membrane.		C
EnsemblPlants Rel 51	TraesCS1A02G271500	TraesCS1A03G0686600		GO:0016021	integral component of membrane	The component of a membrane consisting of the gene products and protein complexes having at least some part of their peptide sequence embedded in the hydrophobic region of the membrane.		C
EnsemblPlants Rel 51	TraesCS1A02G271700	TraesCS1A03G0686900		GO:0016021	integral component of membrane	The component of a membrane consisting of the gene products and protein complexes having at least some part of their peptide sequence embedded in the hydrophobic region of the membrane.		C
EnsemblPlants Rel 51	TraesCS1A02G272900	TraesCS1A03G0689600		GO:0016021	integral component of membrane	The component of a membrane consisting of the gene products and protein complexes having at least some part of their peptide sequence embedded in the hydrophobic region of the membrane.		C
EnsemblPlants Rel 51	TraesCS1A02G273100	TraesCS1A03G0690200		GO:0005515	protein binding	Interacting selectively and non-covalently with any protein or protein complex (a complex of two or more proteins that may include other nonprotein molecules).		F
EnsemblPlants Rel 51	TraesCS1A02G275200	TraesCS1A03G0694200		GO:0071284	cellular response to lead ion	Any process that results in a change in state or activity of a cell (in terms of movement, secretion, enzyme production, gene expression, etc.) as a result of a lead ion stimulus.		P
EnsemblPlants Rel 51	TraesCS1A02G275500	TraesCS1A03G0694700		GO:0045892	negative regulation of transcription, DNA-templated	Any process that stops, prevents, or reduces the frequency, rate or extent of cellular DNA-templated transcription.		P
EnsemblPlants Rel 51	TraesCS1A02G275600	TraesCS1A03G0694800		GO:0045892	negative regulation of transcription, DNA-templated	Any process that stops, prevents, or reduces the frequency, rate or extent of cellular DNA-templated transcription.		P
EnsemblPlants Rel 51	TraesCS1A02G275800	TraesCS1A03G0695700		GO:0003677	DNA binding	Any molecular function by which a gene product interacts selectively and non-covalently with DNA (deoxyribonucleic acid).		F
EnsemblPlants Rel 51	TraesCS1A02G277600	TraesCS1A03G0701100		GO:0005634	nucleus	A membrane-bounded organelle of eukaryotic cells in which chromosomes are housed and replicated. In most cells, the nucleus contains all of the cell's chromosomes except the organellar chromosomes, and is the site of RNA synthesis and processing. In some species, or in specialized cell types, RNA metabolism or DNA replication may be absent.		C
EnsemblPlants Rel 51	TraesCS1A02G277800	TraesCS1A03G0701300		GO:0005515	protein binding	Interacting selectively and non-covalently with any protein or protein complex (a complex of two or more proteins that may include other nonprotein molecules).		F
EnsemblPlants Rel 51	TraesCS1A02G278700	TraesCS1A03G0703200		GO:0016746	transferase activity, transferring acyl groups	Catalysis of the transfer of an acyl group from one compound (donor) to another (acceptor).		F
EnsemblPlants Rel 51	TraesCS1A02G278800	TraesCS1A03G0703300		GO:0016747	transferase activity, transferring acyl groups other than amino-acyl groups	Catalysis of the transfer of an acyl group, other than amino-acyl, from one compound (donor) to another (acceptor).		F
EnsemblPlants Rel 51	TraesCS1A02G279100	TraesCS1A03G0704300		GO:0005515	protein binding	Interacting selectively and non-covalently with any protein or protein complex (a complex of two or more proteins that may include other nonprotein molecules).		F
EnsemblPlants Rel 51	TraesCS1A02G279400	TraesCS1A03G0705800		GO:0005515	protein binding	Interacting selectively and non-covalently with any protein or protein complex (a complex of two or more proteins that may include other nonprotein molecules).		F
EnsemblPlants Rel 51	TraesCS1A02G280100	TraesCS1A03G0707400		GO:0005515	protein binding	Interacting selectively and non-covalently with any protein or protein complex (a complex of two or more proteins that may include other nonprotein molecules).		F
EnsemblPlants Rel 51	TraesCS1A02G280200	TraesCS1A03G0707500		GO:0005515	protein binding	Interacting selectively and non-covalently with any protein or protein complex (a complex of two or more proteins that may include other nonprotein molecules).		F
EnsemblPlants Rel 51	TraesCS1A02G280400	TraesCS1A03G0708000		GO:0016021	integral component of membrane	The component of a membrane consisting of the gene products and protein complexes having at least some part of their peptide sequence embedded in the hydrophobic region of the membrane.		C
EnsemblPlants Rel 51	TraesCS1A02G280900	TraesCS1A03G0708900		GO:0005089	Rho guanyl-nucleotide exchange factor activity	Stimulates the exchange of guanyl nucleotides associated with a GTPase of the Rho family. Under normal cellular physiological conditions, the concentration of GTP is higher than that of GDP, favoring the replacement of GDP by GTP in association with the GTPase.		F
EnsemblPlants Rel 51	TraesCS1A02G281300	TraesCS1A03G0710500		GO:0046983	protein dimerization activity	The formation of a protein dimer, a macromolecular structure consists of two noncovalently associated identical or nonidentical subunits.		F
EnsemblPlants Rel 51	TraesCS1A02G282500	TraesCS1A03G0713000		GO:0016301	kinase activity	Catalysis of the transfer of a phosphate group, usually from ATP, to a substrate molecule.		F
EnsemblPlants Rel 51	TraesCS1A02G283000	TraesCS1A03G0714300		GO:0005515	protein binding	Interacting selectively and non-covalently with any protein or protein complex (a complex of two or more proteins that may include other nonprotein molecules).		F
EnsemblPlants Rel 51	TraesCS1A02G283100	TraesCS1A03G0714400		GO:0016746	transferase activity, transferring acyl groups	Catalysis of the transfer of an acyl group from one compound (donor) to another (acceptor).		F
EnsemblPlants Rel 51	TraesCS1A02G283700	TraesCS1A03G0716600		GO:0005515	protein binding	Interacting selectively and non-covalently with any protein or protein complex (a complex of two or more proteins that may include other nonprotein molecules).		F
EnsemblPlants Rel 51	TraesCS1A02G284200	TraesCS1A03G0717200		GO:0016021	integral component of membrane	The component of a membrane consisting of the gene products and protein complexes having at least some part of their peptide sequence embedded in the hydrophobic region of the membrane.		C
EnsemblPlants Rel 51	TraesCS1A02G284700	TraesCS1A03G0718200		GO:0005515	protein binding	Interacting selectively and non-covalently with any protein or protein complex (a complex of two or more proteins that may include other nonprotein molecules).		F
EnsemblPlants Rel 51	TraesCS1A02G285000	TraesCS1A03G0718600		GO:0005524	ATP binding	Interacting selectively and non-covalently with ATP, adenosine 5'-triphosphate, a universally important coenzyme and enzyme regulator.		F
EnsemblPlants Rel 51	TraesCS1A02G285900	TraesCS1A03G0720000		GO:0003676	nucleic acid binding	Interacting selectively and non-covalently with any nucleic acid.		F
EnsemblPlants Rel 51	TraesCS1A02G286100	TraesCS1A03G0720200		GO:0003676	nucleic acid binding	Interacting selectively and non-covalently with any nucleic acid.		F
EnsemblPlants Rel 51	TraesCS1A02G286400	TraesCS1A03G0720600		GO:0016747	transferase activity, transferring acyl groups other than amino-acyl groups	Catalysis of the transfer of an acyl group, other than amino-acyl, from one compound (donor) to another (acceptor).		F
EnsemblPlants Rel 51	TraesCS1A02G286500	TraesCS1A03G0720700		GO:0016747	transferase activity, transferring acyl groups other than amino-acyl groups	Catalysis of the transfer of an acyl group, other than amino-acyl, from one compound (donor) to another (acceptor).		F
EnsemblPlants Rel 51	TraesCS1A02G286700	TraesCS1A03G0721200		GO:0005515	protein binding	Interacting selectively and non-covalently with any protein or protein complex (a complex of two or more proteins that may include other nonprotein molecules).		F
EnsemblPlants Rel 51	TraesCS1A02G286800	TraesCS1A03G0721400		GO:0005515	protein binding	Interacting selectively and non-covalently with any protein or protein complex (a complex of two or more proteins that may include other nonprotein molecules).		F
EnsemblPlants Rel 51	TraesCS1A02G287500	TraesCS1A03G0723000		GO:0016021	integral component of membrane	The component of a membrane consisting of the gene products and protein complexes having at least some part of their peptide sequence embedded in the hydrophobic region of the membrane.		C
EnsemblPlants Rel 51	TraesCS1A02G288100	TraesCS1A03G0724600		GO:0005515	protein binding	Interacting selectively and non-covalently with any protein or protein complex (a complex of two or more proteins that may include other nonprotein molecules).		F
EnsemblPlants Rel 51	TraesCS1A02G288600	TraesCS1A03G0725200		GO:0004842	ubiquitin-protein transferase activity	Catalysis of the transfer of ubiquitin from one protein to another via the reaction X-Ub + Y --> Y-Ub + X, where both X-Ub and Y-Ub are covalent linkages.		F
EnsemblPlants Rel 51	TraesCS1A02G289500	TraesCS1A03G0726800		GO:0005615	extracellular space	That part of a multicellular organism outside the cells proper, usually taken to be outside the plasma membranes, and occupied by fluid.		C
EnsemblPlants Rel 51	TraesCS1A02G290300	TraesCS1A03G0728300		GO:0070072	vacuolar proton-transporting V-type ATPase complex assembly	The aggregation, arrangement and bonding together of a vacuolar proton-transporting V-type ATPase complex, proton-transporting two-sector ATPase complex that couples ATP hydrolysis to the transport of protons across the vacuolar membrane.		P
EnsemblPlants Rel 51	TraesCS1A02G290400	TraesCS1A03G0728400		GO:0009055	electron transfer activity	Any molecular entity that serves as an electron acceptor and electron donor in an electron transport chain. An electron transport chain is a process in which a series of electron carriers operate together to transfer electrons from donors to any of several different terminal electron acceptors to generate a transmembrane electrochemical gradient.		F
EnsemblPlants Rel 51	TraesCS1A02G290800	TraesCS1A03G0728800		GO:0046983	protein dimerization activity	The formation of a protein dimer, a macromolecular structure consists of two noncovalently associated identical or nonidentical subunits.		F
EnsemblPlants Rel 51	TraesCS1A02G291000	TraesCS1A03G0729000		GO:0003779	actin binding	Interacting selectively and non-covalently with monomeric or multimeric forms of actin, including actin filaments.		F
EnsemblPlants Rel 51	TraesCS1A02G292000	TraesCS1A03G0730900		GO:0016791	phosphatase activity	Catalysis of the hydrolysis of phosphoric monoesters, releasing inorganic phosphate.		F
EnsemblPlants Rel 51	TraesCS1A02G293000	TraesCS1A03G0732400		GO:0004857	enzyme inhibitor activity	Binds to and stops, prevents or reduces the activity of an enzyme.		F
EnsemblPlants Rel 51	TraesCS1A02G293700	TraesCS1A03G0734300		GO:0005515	protein binding	Interacting selectively and non-covalently with any protein or protein complex (a complex of two or more proteins that may include other nonprotein molecules).		F
EnsemblPlants Rel 51	TraesCS1A02G294400	TraesCS1A03G0735500		GO:0005515	protein binding	Interacting selectively and non-covalently with any protein or protein complex (a complex of two or more proteins that may include other nonprotein molecules).		F
EnsemblPlants Rel 51	TraesCS1A02G294500	TraesCS1A03G0735700		GO:0005515	protein binding	Interacting selectively and non-covalently with any protein or protein complex (a complex of two or more proteins that may include other nonprotein molecules).		F
EnsemblPlants Rel 51	TraesCS1A02G294600	TraesCS1A03G0735800		GO:0005515	protein binding	Interacting selectively and non-covalently with any protein or protein complex (a complex of two or more proteins that may include other nonprotein molecules).		F
EnsemblPlants Rel 51	TraesCS1A02G295000	TraesCS1A03G0736300		GO:0016788	hydrolase activity, acting on ester bonds	Catalysis of the hydrolysis of any ester bond.		F
EnsemblPlants Rel 51	TraesCS1A02G295200	TraesCS1A03G0736800	UTP--glucose-1-phosphate uridylyltransferase 3, chloroplastic [Source:Projected from Arabidopsis thaliana (AT3G56040) UniProtKB/Swiss-Prot;Acc:F4IY62]	GO:0070569	uridylyltransferase activity	Catalysis of the transfer of an uridylyl group to an acceptor.		F
EnsemblPlants Rel 51	TraesCS1A02G295900	TraesCS1A03G0738200		GO:0016021	integral component of membrane	The component of a membrane consisting of the gene products and protein complexes having at least some part of their peptide sequence embedded in the hydrophobic region of the membrane.		C
EnsemblPlants Rel 51	TraesCS1A02G296200	TraesCS1A03G0738800		GO:0019867	outer membrane	The external membrane of Gram-negative bacteria or certain organelles such as mitochondria and chloroplasts; freely permeable to most ions and metabolites.		C
EnsemblPlants Rel 51	TraesCS1A02G297000	TraesCS1A03G0740800		GO:0008168	methyltransferase activity	Catalysis of the transfer of a methyl group to an acceptor molecule.		F
EnsemblPlants Rel 51	TraesCS1A02G297900	TraesCS1A03G0742500	PRA1 family protein [Source:UniProtKB/TrEMBL;Acc:A0A1D6RDG1]	GO:0016021	integral component of membrane	The component of a membrane consisting of the gene products and protein complexes having at least some part of their peptide sequence embedded in the hydrophobic region of the membrane.		C
EnsemblPlants Rel 51	TraesCS1A02G298000	TraesCS1A03G0742600		GO:0035091	phosphatidylinositol binding	Interacting selectively and non-covalently with any inositol-containing glycerophospholipid, i.e. phosphatidylinositol (PtdIns) and its phosphorylated derivatives.		F
EnsemblPlants Rel 51	TraesCS1A02G298500	TraesCS1A03G0743400		GO:0003677	DNA binding	Any molecular function by which a gene product interacts selectively and non-covalently with DNA (deoxyribonucleic acid).		F
EnsemblPlants Rel 51	TraesCS1A02G298700	TraesCS1A03G0743900		GO:0016021	integral component of membrane	The component of a membrane consisting of the gene products and protein complexes having at least some part of their peptide sequence embedded in the hydrophobic region of the membrane.		C
EnsemblPlants Rel 51	TraesCS1A02G299200	TraesCS1A03G0745300		GO:0016021	integral component of membrane	The component of a membrane consisting of the gene products and protein complexes having at least some part of their peptide sequence embedded in the hydrophobic region of the membrane.		C
EnsemblPlants Rel 51	TraesCS1A02G300600	TraesCS1A03G0748900		GO:0016021	integral component of membrane	The component of a membrane consisting of the gene products and protein complexes having at least some part of their peptide sequence embedded in the hydrophobic region of the membrane.		C
EnsemblPlants Rel 51	TraesCS1A02G300800	TraesCS1A03G0749100		GO:0016021	integral component of membrane	The component of a membrane consisting of the gene products and protein complexes having at least some part of their peptide sequence embedded in the hydrophobic region of the membrane.		C
EnsemblPlants Rel 51	TraesCS1A02G301300	TraesCS1A03G0749800		GO:1900150	regulation of defense response to fungus	Any process that modulates the frequency, rate or extent of defense response to fungus.		P
EnsemblPlants Rel 51	TraesCS1A02G302100	TraesCS1A03G0751400	Sulfotransferase [Source:UniProtKB/TrEMBL;Acc:A0A1D5S0G4]	GO:0008146	sulfotransferase activity	Catalysis of the transfer of a sulfate group from 3'-phosphoadenosine 5'-phosphosulfate to the hydroxyl group of an acceptor, producing the sulfated derivative and 3'-phosphoadenosine 5'-phosphate.		F
EnsemblPlants Rel 51	TraesCS1A02G302400	TraesCS1A03G0752700		GO:0009638	phototropism	The movement of an organism, or part of an organism, in response to a light stimulus, usually toward or away from it.		P
EnsemblPlants Rel 51	TraesCS1A02G303200	TraesCS1A03G0753900		GO:0016021	integral component of membrane	The component of a membrane consisting of the gene products and protein complexes having at least some part of their peptide sequence embedded in the hydrophobic region of the membrane.		C
EnsemblPlants Rel 51	TraesCS1A02G303900	TraesCS1A03G0755600		GO:0005515	protein binding	Interacting selectively and non-covalently with any protein or protein complex (a complex of two or more proteins that may include other nonprotein molecules).		F
EnsemblPlants Rel 51	TraesCS1A02G305800	TraesCS1A03G0760400		GO:0046856	phosphatidylinositol dephosphorylation	The process of removing one or more phosphate groups from a phosphatidylinositol.		P
EnsemblPlants Rel 51	TraesCS1A02G306000	TraesCS1A03G0760600		GO:0016021	integral component of membrane	The component of a membrane consisting of the gene products and protein complexes having at least some part of their peptide sequence embedded in the hydrophobic region of the membrane.		C
EnsemblPlants Rel 51	TraesCS1A02G306700	TraesCS1A03G0762100		GO:0005515	protein binding	Interacting selectively and non-covalently with any protein or protein complex (a complex of two or more proteins that may include other nonprotein molecules).		F
EnsemblPlants Rel 51	TraesCS1A02G307300	TraesCS1A03G0763500		GO:0005829	cytosol	The part of the cytoplasm that does not contain organelles but which does contain other particulate matter, such as protein complexes.		C
EnsemblPlants Rel 51	TraesCS1A02G307800	TraesCS1A03G0764100		GO:0005515	protein binding	Interacting selectively and non-covalently with any protein or protein complex (a complex of two or more proteins that may include other nonprotein molecules).		F
EnsemblPlants Rel 51	TraesCS1A02G308500	TraesCS1A03G0765300		GO:0016021	integral component of membrane	The component of a membrane consisting of the gene products and protein complexes having at least some part of their peptide sequence embedded in the hydrophobic region of the membrane.		C
EnsemblPlants Rel 51	TraesCS1A02G308800	TraesCS1A03G0765800		GO:0005509	calcium ion binding	Interacting selectively and non-covalently with calcium ions (Ca2+).		F
EnsemblPlants Rel 51	TraesCS1A02G308900	TraesCS1A03G0765900		GO:0005515	protein binding	Interacting selectively and non-covalently with any protein or protein complex (a complex of two or more proteins that may include other nonprotein molecules).		F
EnsemblPlants Rel 51	TraesCS1A02G309100	TraesCS1A03G0766600		GO:0005515	protein binding	Interacting selectively and non-covalently with any protein or protein complex (a complex of two or more proteins that may include other nonprotein molecules).		F
EnsemblPlants Rel 51	TraesCS1A02G309300	TraesCS1A03G0767600		GO:0051091	positive regulation of DNA-binding transcription factor activity	Any process that activates or increases the frequency, rate or extent of activity of a transcription factor, any factor involved in the initiation or regulation of transcription.		P
EnsemblPlants Rel 51	TraesCS1A02G309500	TraesCS1A03G0768300		GO:0043531	ADP binding	Interacting selectively and non-covalently with ADP, adenosine 5'-diphosphate.		F
EnsemblPlants Rel 51	TraesCS1A02G311200	TraesCS1A03G0772300		GO:0005515	protein binding	Interacting selectively and non-covalently with any protein or protein complex (a complex of two or more proteins that may include other nonprotein molecules).		F
EnsemblPlants Rel 51	TraesCS1A02G311600	TraesCS1A03G0773700		GO:0016021	integral component of membrane	The component of a membrane consisting of the gene products and protein complexes having at least some part of their peptide sequence embedded in the hydrophobic region of the membrane.		C
EnsemblPlants Rel 51	TraesCS1A02G312900	TraesCS1A03G0776600		GO:0009055	electron transfer activity	Any molecular entity that serves as an electron acceptor and electron donor in an electron transport chain. An electron transport chain is a process in which a series of electron carriers operate together to transfer electrons from donors to any of several different terminal electron acceptors to generate a transmembrane electrochemical gradient.		F
EnsemblPlants Rel 51	TraesCS1A02G313100	TraesCS1A03G0776900		GO:0003677	DNA binding	Any molecular function by which a gene product interacts selectively and non-covalently with DNA (deoxyribonucleic acid).		F
EnsemblPlants Rel 51	TraesCS1A02G313500	TraesCS1A03G0778900		GO:0005515	protein binding	Interacting selectively and non-covalently with any protein or protein complex (a complex of two or more proteins that may include other nonprotein molecules).		F
EnsemblPlants Rel 51	TraesCS1A02G313600	TraesCS1A03G0779000		GO:0003676	nucleic acid binding	Interacting selectively and non-covalently with any nucleic acid.		F
EnsemblPlants Rel 51	TraesCS1A02G314600	TraesCS1A03G0781500		GO:0016021	integral component of membrane	The component of a membrane consisting of the gene products and protein complexes having at least some part of their peptide sequence embedded in the hydrophobic region of the membrane.		C
EnsemblPlants Rel 51	TraesCS1A02G316200	TraesCS1A03G0785200		GO:0009055	electron transfer activity	Any molecular entity that serves as an electron acceptor and electron donor in an electron transport chain. An electron transport chain is a process in which a series of electron carriers operate together to transfer electrons from donors to any of several different terminal electron acceptors to generate a transmembrane electrochemical gradient.		F
EnsemblPlants Rel 51	TraesCS1A02G316300	TraesCS1A03G0785400		GO:0009055	electron transfer activity	Any molecular entity that serves as an electron acceptor and electron donor in an electron transport chain. An electron transport chain is a process in which a series of electron carriers operate together to transfer electrons from donors to any of several different terminal electron acceptors to generate a transmembrane electrochemical gradient.		F
EnsemblPlants Rel 51	TraesCS1A02G316400	TraesCS1A03G0785700		GO:0009055	electron transfer activity	Any molecular entity that serves as an electron acceptor and electron donor in an electron transport chain. An electron transport chain is a process in which a series of electron carriers operate together to transfer electrons from donors to any of several different terminal electron acceptors to generate a transmembrane electrochemical gradient.		F
EnsemblPlants Rel 51	TraesCS1A02G316600	TraesCS1A03G0786100		GO:0009055	electron transfer activity	Any molecular entity that serves as an electron acceptor and electron donor in an electron transport chain. An electron transport chain is a process in which a series of electron carriers operate together to transfer electrons from donors to any of several different terminal electron acceptors to generate a transmembrane electrochemical gradient.		F
EnsemblPlants Rel 51	TraesCS1A02G316700	TraesCS1A03G0786300		GO:0009055	electron transfer activity	Any molecular entity that serves as an electron acceptor and electron donor in an electron transport chain. An electron transport chain is a process in which a series of electron carriers operate together to transfer electrons from donors to any of several different terminal electron acceptors to generate a transmembrane electrochemical gradient.		F
EnsemblPlants Rel 51	TraesCS1A02G316800	TraesCS1A03G0786500		GO:0009055	electron transfer activity	Any molecular entity that serves as an electron acceptor and electron donor in an electron transport chain. An electron transport chain is a process in which a series of electron carriers operate together to transfer electrons from donors to any of several different terminal electron acceptors to generate a transmembrane electrochemical gradient.		F
EnsemblPlants Rel 51	TraesCS1A02G319100	TraesCS1A03G0790900		GO:0016021	integral component of membrane	The component of a membrane consisting of the gene products and protein complexes having at least some part of their peptide sequence embedded in the hydrophobic region of the membrane.		C
EnsemblPlants Rel 51	TraesCS1A02G319200	TraesCS1A03G0791300		GO:0008194	UDP-glycosyltransferase activity	Catalysis of the transfer of a glycosyl group from a UDP-sugar to a small hydrophobic molecule.		F
EnsemblPlants Rel 51	TraesCS1A02G319500	TraesCS1A03G0791700		GO:0009941	chloroplast envelope	The double lipid bilayer enclosing the chloroplast and separating its contents from the rest of the cytoplasm; includes the intermembrane space.		C
EnsemblPlants Rel 51	TraesCS1A02G320300	TraesCS1A03G0793300		GO:0046983	protein dimerization activity	The formation of a protein dimer, a macromolecular structure consists of two noncovalently associated identical or nonidentical subunits.		F
EnsemblPlants Rel 51	TraesCS1A02G321100	TraesCS1A03G0794800		GO:0016788	hydrolase activity, acting on ester bonds	Catalysis of the hydrolysis of any ester bond.		F
EnsemblPlants Rel 51	TraesCS1A02G321400	TraesCS1A03G0795400		GO:0003700	DNA-binding transcription factor activity	Interacting selectively and non-covalently with a specific double-stranded genomic DNA sequence (sometimes referred to as a motif) within the regulatory region of a gene to modulate transcription. Regulatory regions include promoters (proximal and distal) and enhancers. Genes are transcriptional units, and include bacterial operons.		F
EnsemblPlants Rel 51	TraesCS1A02G321500	TraesCS1A03G0795500		GO:0003700	DNA-binding transcription factor activity	Interacting selectively and non-covalently with a specific double-stranded genomic DNA sequence (sometimes referred to as a motif) within the regulatory region of a gene to modulate transcription. Regulatory regions include promoters (proximal and distal) and enhancers. Genes are transcriptional units, and include bacterial operons.		F
EnsemblPlants Rel 51	TraesCS1A02G321600	TraesCS1A03G0795800		GO:0003700	DNA-binding transcription factor activity	Interacting selectively and non-covalently with a specific double-stranded genomic DNA sequence (sometimes referred to as a motif) within the regulatory region of a gene to modulate transcription. Regulatory regions include promoters (proximal and distal) and enhancers. Genes are transcriptional units, and include bacterial operons.		F
EnsemblPlants Rel 51	TraesCS1A02G322100	TraesCS1A03G0797000		GO:0016021	integral component of membrane	The component of a membrane consisting of the gene products and protein complexes having at least some part of their peptide sequence embedded in the hydrophobic region of the membrane.		C
EnsemblPlants Rel 51	TraesCS1A02G322400	TraesCS1A03G0797300		GO:0005515	protein binding	Interacting selectively and non-covalently with any protein or protein complex (a complex of two or more proteins that may include other nonprotein molecules).		F
EnsemblPlants Rel 51	TraesCS1A02G322500	TraesCS1A03G0797700		GO:0016021	integral component of membrane	The component of a membrane consisting of the gene products and protein complexes having at least some part of their peptide sequence embedded in the hydrophobic region of the membrane.		C
EnsemblPlants Rel 51	TraesCS1A02G322600	TraesCS1A03G0798100		GO:0016788	hydrolase activity, acting on ester bonds	Catalysis of the hydrolysis of any ester bond.		F
EnsemblPlants Rel 51	TraesCS1A02G323100	TraesCS1A03G0800900		GO:0008194	UDP-glycosyltransferase activity	Catalysis of the transfer of a glycosyl group from a UDP-sugar to a small hydrophobic molecule.		F
EnsemblPlants Rel 51	TraesCS1A02G323600	TraesCS1A03G0802600		GO:0043531	ADP binding	Interacting selectively and non-covalently with ADP, adenosine 5'-diphosphate.		F
EnsemblPlants Rel 51	TraesCS1A02G323700	TraesCS1A03G0803400		GO:0045168	cell-cell signaling involved in cell fate commitment	Signaling at long or short range between cells that results in the commitment of a cell to a certain fate.		P
EnsemblPlants Rel 51	TraesCS1A02G325000	TraesCS1A03G0806000		GO:0016021	integral component of membrane	The component of a membrane consisting of the gene products and protein complexes having at least some part of their peptide sequence embedded in the hydrophobic region of the membrane.		C
EnsemblPlants Rel 51	TraesCS1A02G325500	TraesCS1A03G0808500		GO:0030246	carbohydrate binding	Interacting selectively and non-covalently with any carbohydrate, which includes monosaccharides, oligosaccharides and polysaccharides as well as substances derived from monosaccharides by reduction of the carbonyl group (alditols), by oxidation of one or more hydroxy groups to afford the corresponding aldehydes, ketones, or carboxylic acids, or by replacement of one or more hydroxy group(s) by a…		F
EnsemblPlants Rel 51	TraesCS1A02G325900	TraesCS1A03G0809200		GO:0005515	protein binding	Interacting selectively and non-covalently with any protein or protein complex (a complex of two or more proteins that may include other nonprotein molecules).		F
EnsemblPlants Rel 51	TraesCS1A02G326000	TraesCS1A03G0809300		GO:0016021	integral component of membrane	The component of a membrane consisting of the gene products and protein complexes having at least some part of their peptide sequence embedded in the hydrophobic region of the membrane.		C
EnsemblPlants Rel 51	TraesCS1A02G326600	TraesCS1A03G0810300		GO:0008061	chitin binding	Interacting selectively and non-covalently with chitin, a linear polysaccharide consisting of beta-(1->4)-linked N-acetyl-D-glucosamine residues.		F
EnsemblPlants Rel 51	TraesCS1A02G327900	TraesCS1A03G0811900		GO:0004866	endopeptidase inhibitor activity	Stops, prevents or reduces the activity of an endopeptidase, any enzyme that hydrolyzes nonterminal peptide bonds in polypeptides.		F
EnsemblPlants Rel 51	TraesCS1A02G328200	TraesCS1A03G0812500		GO:0019867	outer membrane	The external membrane of Gram-negative bacteria or certain organelles such as mitochondria and chloroplasts; freely permeable to most ions and metabolites.		C
EnsemblPlants Rel 51	TraesCS1A02G329300	TraesCS1A03G0815400		GO:0005515	protein binding	Interacting selectively and non-covalently with any protein or protein complex (a complex of two or more proteins that may include other nonprotein molecules).		F
EnsemblPlants Rel 51	TraesCS1A02G330300	TraesCS1A03G0818800		GO:0000290	deadenylation-dependent decapping of nuclear-transcribed mRNA	Cleavage of the 5'-cap of a nuclear mRNA triggered by shortening of the poly(A) tail to below a minimum functional length.		P
EnsemblPlants Rel 51	TraesCS1A02G330800	TraesCS1A03G0821300		GO:0005515	protein binding	Interacting selectively and non-covalently with any protein or protein complex (a complex of two or more proteins that may include other nonprotein molecules).		F
EnsemblPlants Rel 51	TraesCS1A02G331700	TraesCS1A03G0823300		GO:0016021	integral component of membrane	The component of a membrane consisting of the gene products and protein complexes having at least some part of their peptide sequence embedded in the hydrophobic region of the membrane.		C
EnsemblPlants Rel 51	TraesCS1A02G331800	TraesCS1A03G0823500		GO:0016021	integral component of membrane	The component of a membrane consisting of the gene products and protein complexes having at least some part of their peptide sequence embedded in the hydrophobic region of the membrane.		C
EnsemblPlants Rel 51	TraesCS1A02G332200	TraesCS1A03G0824000		GO:0007623	circadian rhythm	Any biological process in an organism that recurs with a regularity of approximately 24 hours.		P
EnsemblPlants Rel 51	TraesCS1A02G333100	TraesCS1A03G0826000		GO:0008270	zinc ion binding	Interacting selectively and non-covalently with zinc (Zn) ions.		F
EnsemblPlants Rel 51	TraesCS1A02G333900	TraesCS1A03G0827300	Tubby-like F-box protein [Source:UniProtKB/TrEMBL;Acc:A0A1D5S0A4]	GO:0005515	protein binding	Interacting selectively and non-covalently with any protein or protein complex (a complex of two or more proteins that may include other nonprotein molecules).		F
EnsemblPlants Rel 51	TraesCS1A02G336200	TraesCS1A03G0830900		GO:0005515	protein binding	Interacting selectively and non-covalently with any protein or protein complex (a complex of two or more proteins that may include other nonprotein molecules).		F
EnsemblPlants Rel 51	TraesCS1A02G337900	TraesCS1A03G0834700		GO:0016021	integral component of membrane	The component of a membrane consisting of the gene products and protein complexes having at least some part of their peptide sequence embedded in the hydrophobic region of the membrane.		C
EnsemblPlants Rel 51	TraesCS1A02G338100	TraesCS1A03G0835800		GO:0045892	negative regulation of transcription, DNA-templated	Any process that stops, prevents, or reduces the frequency, rate or extent of cellular DNA-templated transcription.		P
EnsemblPlants Rel 51	TraesCS1A02G338500	TraesCS1A03G0836300		GO:0004112	cyclic-nucleotide phosphodiesterase activity	Catalysis of the reaction: a nucleoside cyclic phosphate + H2O = a nucleoside phosphate.		F
EnsemblPlants Rel 51	TraesCS1A02G339400	TraesCS1A03G0837800		GO:0016788	hydrolase activity, acting on ester bonds	Catalysis of the hydrolysis of any ester bond.		F
EnsemblPlants Rel 51	TraesCS1A02G340000	TraesCS1A03G0839200		GO:0005515	protein binding	Interacting selectively and non-covalently with any protein or protein complex (a complex of two or more proteins that may include other nonprotein molecules).		F
EnsemblPlants Rel 51	TraesCS1A02G340200	TraesCS1A03G0839500		GO:0009507	chloroplast	A chlorophyll-containing plastid with thylakoids organized into grana and frets, or stroma thylakoids, and embedded in a stroma.		C
EnsemblPlants Rel 51	TraesCS1A02G340700	TraesCS1A03G0841000		GO:0004045	aminoacyl-tRNA hydrolase activity	Catalysis of the reaction: N-substituted aminoacyl-tRNA + H2O = N-substituted amino acid + tRNA.		F
EnsemblPlants Rel 51	TraesCS1A02G341400	TraesCS1A03G0843300		GO:0016021	integral component of membrane	The component of a membrane consisting of the gene products and protein complexes having at least some part of their peptide sequence embedded in the hydrophobic region of the membrane.		C
EnsemblPlants Rel 51	TraesCS1A02G341600	TraesCS1A03G0843500		GO:0000160	phosphorelay signal transduction system	A conserved series of molecular signals found in prokaryotes and eukaryotes; involves autophosphorylation of a histidine kinase and the transfer of the phosphate group to an aspartate that then acts as a phospho-donor to response regulator proteins.		P
EnsemblPlants Rel 51	TraesCS1A02G341900	TraesCS1A03G0844200		GO:0005515	protein binding	Interacting selectively and non-covalently with any protein or protein complex (a complex of two or more proteins that may include other nonprotein molecules).		F
EnsemblPlants Rel 51	TraesCS1A02G342800	TraesCS1A03G0845700		GO:0055114	oxidation-reduction process	A metabolic process that results in the removal or addition of one or more electrons to or from a substance, with or without the concomitant removal or addition of a proton or protons.		P
EnsemblPlants Rel 51	TraesCS1A02G343400	TraesCS1A03G0846500	Profilin [Source:UniProtKB/TrEMBL;Acc:A0A341P2C6]	GO:0003779	actin binding	Interacting selectively and non-covalently with monomeric or multimeric forms of actin, including actin filaments.		F
EnsemblPlants Rel 51	TraesCS1A02G344200	TraesCS1A03G0848000		GO:0005515	protein binding	Interacting selectively and non-covalently with any protein or protein complex (a complex of two or more proteins that may include other nonprotein molecules).		F
EnsemblPlants Rel 51	TraesCS1A02G345200	TraesCS1A03G0849500		GO:0046983	protein dimerization activity	The formation of a protein dimer, a macromolecular structure consists of two noncovalently associated identical or nonidentical subunits.		F
EnsemblPlants Rel 51	TraesCS1A02G346500	TraesCS1A03G0851400		GO:0046872	metal ion binding	Interacting selectively and non-covalently with any metal ion.		F
EnsemblPlants Rel 51	TraesCS1A02G346600	TraesCS1A03G0851600		GO:0048564	photosystem I assembly	The aggregation, arrangement and bonding together of a set of components to form a photosystem I complex on the thylakoid membrane.		P
EnsemblPlants Rel 51	TraesCS1A02G346700	TraesCS1A03G0851700		GO:0005515	protein binding	Interacting selectively and non-covalently with any protein or protein complex (a complex of two or more proteins that may include other nonprotein molecules).		F
EnsemblPlants Rel 51	TraesCS1A02G347200	TraesCS1A03G0852300		GO:0008194	UDP-glycosyltransferase activity	Catalysis of the transfer of a glycosyl group from a UDP-sugar to a small hydrophobic molecule.		F
EnsemblPlants Rel 51	TraesCS1A02G347500	TraesCS1A03G0853100		GO:0008194	UDP-glycosyltransferase activity	Catalysis of the transfer of a glycosyl group from a UDP-sugar to a small hydrophobic molecule.		F
EnsemblPlants Rel 51	TraesCS1A02G347600	TraesCS1A03G0853200		GO:0008194	UDP-glycosyltransferase activity	Catalysis of the transfer of a glycosyl group from a UDP-sugar to a small hydrophobic molecule.		F
EnsemblPlants Rel 51	TraesCS1A02G348000	TraesCS1A03G0853600		GO:0009055	electron transfer activity	Any molecular entity that serves as an electron acceptor and electron donor in an electron transport chain. An electron transport chain is a process in which a series of electron carriers operate together to transfer electrons from donors to any of several different terminal electron acceptors to generate a transmembrane electrochemical gradient.		F
EnsemblPlants Rel 51	TraesCS1A02G348700	TraesCS1A03G0855100		GO:0016021	integral component of membrane	The component of a membrane consisting of the gene products and protein complexes having at least some part of their peptide sequence embedded in the hydrophobic region of the membrane.		C
EnsemblPlants Rel 51	TraesCS1A02G349200	TraesCS1A03G0855800		GO:0003824	catalytic activity	Catalysis of a biochemical reaction at physiological temperatures. In biologically catalyzed reactions, the reactants are known as substrates, and the catalysts are naturally occurring macromolecular substances known as enzymes. Enzymes possess specific binding sites for substrates, and are usually composed wholly or largely of protein, but RNA that has catalytic activity (ribozyme) is often also…		F
EnsemblPlants Rel 51	TraesCS1A02G349300	TraesCS1A03G0855700		GO:0016021	integral component of membrane	The component of a membrane consisting of the gene products and protein complexes having at least some part of their peptide sequence embedded in the hydrophobic region of the membrane.		C
EnsemblPlants Rel 51	TraesCS1A02G350600	TraesCS1A03G0860000	WD repeat-containing protein 55 [Source:Projected from Arabidopsis thaliana (AT2G34260) UniProtKB/Swiss-Prot;Acc:O80775]	GO:0005515	protein binding	Interacting selectively and non-covalently with any protein or protein complex (a complex of two or more proteins that may include other nonprotein molecules).		F
EnsemblPlants Rel 51	TraesCS1A02G350700	TraesCS1A03G0860400		GO:0016021	integral component of membrane	The component of a membrane consisting of the gene products and protein complexes having at least some part of their peptide sequence embedded in the hydrophobic region of the membrane.		C
EnsemblPlants Rel 51	TraesCS1A02G350800	TraesCS1A03G0860500		GO:0005515	protein binding	Interacting selectively and non-covalently with any protein or protein complex (a complex of two or more proteins that may include other nonprotein molecules).		F
EnsemblPlants Rel 51	TraesCS1A02G351100	TraesCS1A03G0861100		GO:0005515	protein binding	Interacting selectively and non-covalently with any protein or protein complex (a complex of two or more proteins that may include other nonprotein molecules).		F
EnsemblPlants Rel 51	TraesCS1A02G351500	TraesCS1A03G0862500		GO:0005515	protein binding	Interacting selectively and non-covalently with any protein or protein complex (a complex of two or more proteins that may include other nonprotein molecules).		F
EnsemblPlants Rel 51	TraesCS1A02G351800	TraesCS1A03G0863500		GO:0005515	protein binding	Interacting selectively and non-covalently with any protein or protein complex (a complex of two or more proteins that may include other nonprotein molecules).		F
EnsemblPlants Rel 51	TraesCS1A02G352200	TraesCS1A03G0864200		GO:0005509	calcium ion binding	Interacting selectively and non-covalently with calcium ions (Ca2+).		F
EnsemblPlants Rel 51	TraesCS1A02G352400	TraesCS1A03G0864400		GO:0005515	protein binding	Interacting selectively and non-covalently with any protein or protein complex (a complex of two or more proteins that may include other nonprotein molecules).		F
EnsemblPlants Rel 51	TraesCS1A02G352600	TraesCS1A03G0864800		GO:0005515	protein binding	Interacting selectively and non-covalently with any protein or protein complex (a complex of two or more proteins that may include other nonprotein molecules).		F
EnsemblPlants Rel 51	TraesCS1A02G353400	TraesCS1A03G0866300		GO:0005975	carbohydrate metabolic process	The chemical reactions and pathways involving carbohydrates, any of a group of organic compounds based of the general formula Cx(H2O)y. Includes the formation of carbohydrate derivatives by the addition of a carbohydrate residue to another molecule.		P
EnsemblPlants Rel 51	TraesCS1A02G353600	TraesCS1A03G0866500		GO:0005975	carbohydrate metabolic process	The chemical reactions and pathways involving carbohydrates, any of a group of organic compounds based of the general formula Cx(H2O)y. Includes the formation of carbohydrate derivatives by the addition of a carbohydrate residue to another molecule.		P
EnsemblPlants Rel 51	TraesCS1A02G353900	TraesCS1A03G0867300		GO:0043531	ADP binding	Interacting selectively and non-covalently with ADP, adenosine 5'-diphosphate.		F
EnsemblPlants Rel 51	TraesCS1A02G354000	TraesCS1A03G0867600		GO:0043531	ADP binding	Interacting selectively and non-covalently with ADP, adenosine 5'-diphosphate.		F
EnsemblPlants Rel 51	TraesCS1A02G354100	TraesCS1A03G0867700		GO:0043531	ADP binding	Interacting selectively and non-covalently with ADP, adenosine 5'-diphosphate.		F
EnsemblPlants Rel 51	TraesCS1A02G354200	TraesCS1A03G0867800		GO:0043531	ADP binding	Interacting selectively and non-covalently with ADP, adenosine 5'-diphosphate.		F
EnsemblPlants Rel 51	TraesCS1A02G354500	TraesCS1A03G0868700		GO:0005515	protein binding	Interacting selectively and non-covalently with any protein or protein complex (a complex of two or more proteins that may include other nonprotein molecules).		F
EnsemblPlants Rel 51	TraesCS1A02G354600	TraesCS1A03G0868800		GO:0016021	integral component of membrane	The component of a membrane consisting of the gene products and protein complexes having at least some part of their peptide sequence embedded in the hydrophobic region of the membrane.		C
EnsemblPlants Rel 51	TraesCS1A02G354700	TraesCS1A03G0868900		GO:0003723	RNA binding	Interacting selectively and non-covalently with an RNA molecule or a portion thereof.		F
EnsemblPlants Rel 51	TraesCS1A02G355000	TraesCS1A03G0869400		GO:0005515	protein binding	Interacting selectively and non-covalently with any protein or protein complex (a complex of two or more proteins that may include other nonprotein molecules).		F
EnsemblPlants Rel 51	TraesCS1A02G355800	TraesCS1A03G0870900		GO:0016021	integral component of membrane	The component of a membrane consisting of the gene products and protein complexes having at least some part of their peptide sequence embedded in the hydrophobic region of the membrane.		C
EnsemblPlants Rel 51	TraesCS1A02G356200	TraesCS1A03G0871500		GO:0016021	integral component of membrane	The component of a membrane consisting of the gene products and protein complexes having at least some part of their peptide sequence embedded in the hydrophobic region of the membrane.		C
EnsemblPlants Rel 51	TraesCS1A02G356700	TraesCS1A03G0873000		GO:0005515	protein binding	Interacting selectively and non-covalently with any protein or protein complex (a complex of two or more proteins that may include other nonprotein molecules).		F
EnsemblPlants Rel 51	TraesCS1A02G357400	TraesCS1A03G0874000		GO:0003676	nucleic acid binding	Interacting selectively and non-covalently with any nucleic acid.		F
EnsemblPlants Rel 51	TraesCS1A02G357500	TraesCS1A03G0874100		GO:0005515	protein binding	Interacting selectively and non-covalently with any protein or protein complex (a complex of two or more proteins that may include other nonprotein molecules).		F
EnsemblPlants Rel 51	TraesCS1A02G358200	TraesCS1A03G0874900		GO:0005515	protein binding	Interacting selectively and non-covalently with any protein or protein complex (a complex of two or more proteins that may include other nonprotein molecules).		F
EnsemblPlants Rel 51	TraesCS1A02G358700	TraesCS1A03G0875900	Sulfotransferase [Source:UniProtKB/TrEMBL;Acc:A0A341P2W0]	GO:0008146	sulfotransferase activity	Catalysis of the transfer of a sulfate group from 3'-phosphoadenosine 5'-phosphosulfate to the hydroxyl group of an acceptor, producing the sulfated derivative and 3'-phosphoadenosine 5'-phosphate.		F
EnsemblPlants Rel 51	TraesCS1A02G358900	TraesCS1A03G0876100	Sulfotransferase [Source:UniProtKB/TrEMBL;Acc:A0A341NRF4]	GO:0008146	sulfotransferase activity	Catalysis of the transfer of a sulfate group from 3'-phosphoadenosine 5'-phosphosulfate to the hydroxyl group of an acceptor, producing the sulfated derivative and 3'-phosphoadenosine 5'-phosphate.		F
EnsemblPlants Rel 51	TraesCS1A02G359400	TraesCS1A03G0877600		GO:0016021	integral component of membrane	The component of a membrane consisting of the gene products and protein complexes having at least some part of their peptide sequence embedded in the hydrophobic region of the membrane.		C
EnsemblPlants Rel 51	TraesCS1A02G359500	TraesCS1A03G0877800		GO:0005515	protein binding	Interacting selectively and non-covalently with any protein or protein complex (a complex of two or more proteins that may include other nonprotein molecules).		F
EnsemblPlants Rel 51	TraesCS1A02G359600	TraesCS1A03G0878000		GO:0005515	protein binding	Interacting selectively and non-covalently with any protein or protein complex (a complex of two or more proteins that may include other nonprotein molecules).		F
EnsemblPlants Rel 51	TraesCS1A02G361000	TraesCS1A03G0881200		GO:0016021	integral component of membrane	The component of a membrane consisting of the gene products and protein complexes having at least some part of their peptide sequence embedded in the hydrophobic region of the membrane.		C
EnsemblPlants Rel 51	TraesCS1A02G361300	TraesCS1A03G0881500	Uncharacterized protein At4g29660 [Source:Projected from Arabidopsis thaliana (AT4G29660) UniProtKB/Swiss-Prot;Acc:Q94K18]	GO:0016021	integral component of membrane	The component of a membrane consisting of the gene products and protein complexes having at least some part of their peptide sequence embedded in the hydrophobic region of the membrane.		C
EnsemblPlants Rel 51	TraesCS1A02G362200	TraesCS1A03G0883300		GO:0005515	protein binding	Interacting selectively and non-covalently with any protein or protein complex (a complex of two or more proteins that may include other nonprotein molecules).		F
EnsemblPlants Rel 51	TraesCS1A02G362300	TraesCS1A03G0883400		GO:0005515	protein binding	Interacting selectively and non-covalently with any protein or protein complex (a complex of two or more proteins that may include other nonprotein molecules).		F
EnsemblPlants Rel 51	TraesCS1A02G362400	TraesCS1A03G0883500		GO:0005515	protein binding	Interacting selectively and non-covalently with any protein or protein complex (a complex of two or more proteins that may include other nonprotein molecules).		F
EnsemblPlants Rel 51	TraesCS1A02G363600	TraesCS1A03G0886200	Jacalin-related lectin 19 [Source:Projected from Arabidopsis thaliana (AT1G73040) UniProtKB/Swiss-Prot;Acc:Q9SSM3]	GO:0030246	carbohydrate binding	Interacting selectively and non-covalently with any carbohydrate, which includes monosaccharides, oligosaccharides and polysaccharides as well as substances derived from monosaccharides by reduction of the carbonyl group (alditols), by oxidation of one or more hydroxy groups to afford the corresponding aldehydes, ketones, or carboxylic acids, or by replacement of one or more hydroxy group(s) by a…		F
EnsemblPlants Rel 51	TraesCS1A02G364500	TraesCS1A03G0887700		GO:0006629	lipid metabolic process	The chemical reactions and pathways involving lipids, compounds soluble in an organic solvent but not, or sparingly, in an aqueous solvent. Includes fatty acids; neutral fats, other fatty-acid esters, and soaps; long-chain (fatty) alcohols and waxes; sphingoids and other long-chain bases; glycolipids, phospholipids and sphingolipids; and carotenes, polyprenols, sterols, terpenes and other isopren…		P
EnsemblPlants Rel 51	TraesCS1A02G365400	TraesCS1A03G0888800		GO:0045492	xylan biosynthetic process	The chemical reactions and pathways resulting in the formation of xylan, a polymer containing a beta-1,4-linked D-xylose backbone.		P
EnsemblPlants Rel 51	TraesCS1A02G365500	TraesCS1A03G0889100		GO:0004857	enzyme inhibitor activity	Binds to and stops, prevents or reduces the activity of an enzyme.		F
EnsemblPlants Rel 51	TraesCS1A02G365900	TraesCS1A03G0889900		GO:0003677	DNA binding	Any molecular function by which a gene product interacts selectively and non-covalently with DNA (deoxyribonucleic acid).		F
EnsemblPlants Rel 51	TraesCS1A02G366000	TraesCS1A03G0890700		GO:0003677	DNA binding	Any molecular function by which a gene product interacts selectively and non-covalently with DNA (deoxyribonucleic acid).		F
EnsemblPlants Rel 51	TraesCS1A02G366100	TraesCS1A03G0891000		GO:0003677	DNA binding	Any molecular function by which a gene product interacts selectively and non-covalently with DNA (deoxyribonucleic acid).		F
EnsemblPlants Rel 51	TraesCS1A02G366200	TraesCS1A03G0891100		GO:0003677	DNA binding	Any molecular function by which a gene product interacts selectively and non-covalently with DNA (deoxyribonucleic acid).		F
EnsemblPlants Rel 51	TraesCS1A02G366300	TraesCS1A03G0891200		GO:0003677	DNA binding	Any molecular function by which a gene product interacts selectively and non-covalently with DNA (deoxyribonucleic acid).		F
EnsemblPlants Rel 51	TraesCS1A02G366600	TraesCS1A03G0891700		GO:0004857	enzyme inhibitor activity	Binds to and stops, prevents or reduces the activity of an enzyme.		F
EnsemblPlants Rel 51	TraesCS1A02G366800	TraesCS1A03G0891900		GO:0046872	metal ion binding	Interacting selectively and non-covalently with any metal ion.		F
EnsemblPlants Rel 51	TraesCS1A02G368100	TraesCS1A03G0894100		GO:0003677	DNA binding	Any molecular function by which a gene product interacts selectively and non-covalently with DNA (deoxyribonucleic acid).		F
EnsemblPlants Rel 51	TraesCS1A02G368600	TraesCS1A03G0895100		GO:0005515	protein binding	Interacting selectively and non-covalently with any protein or protein complex (a complex of two or more proteins that may include other nonprotein molecules).		F
EnsemblPlants Rel 51	TraesCS1A02G368700	TraesCS1A03G0895200		GO:0005515	protein binding	Interacting selectively and non-covalently with any protein or protein complex (a complex of two or more proteins that may include other nonprotein molecules).		F
EnsemblPlants Rel 51	TraesCS1A02G368800	TraesCS1A03G0895300		GO:0016021	integral component of membrane	The component of a membrane consisting of the gene products and protein complexes having at least some part of their peptide sequence embedded in the hydrophobic region of the membrane.		C
EnsemblPlants Rel 51	TraesCS1A02G369200	TraesCS1A03G0896000		GO:0046983	protein dimerization activity	The formation of a protein dimer, a macromolecular structure consists of two noncovalently associated identical or nonidentical subunits.		F
EnsemblPlants Rel 51	TraesCS1A02G369300	TraesCS1A03G0896100		GO:1900034	regulation of cellular response to heat	Any process that modulates the frequency, rate or extent of cellular response to heat.		P
EnsemblPlants Rel 51	TraesCS1A02G369500	TraesCS1A03G0896700		GO:0045735	nutrient reservoir activity	Functions in the storage of nutritious substrates.		F
EnsemblPlants Rel 51	TraesCS1A02G370100	TraesCS1A03G0897400		GO:0055114	oxidation-reduction process	A metabolic process that results in the removal or addition of one or more electrons to or from a substance, with or without the concomitant removal or addition of a proton or protons.		P
EnsemblPlants Rel 51	TraesCS1A02G370900	TraesCS1A03G0900300		GO:0005515	protein binding	Interacting selectively and non-covalently with any protein or protein complex (a complex of two or more proteins that may include other nonprotein molecules).		F
EnsemblPlants Rel 51	TraesCS1A02G371000	TraesCS1A03G0901200		GO:0005515	protein binding	Interacting selectively and non-covalently with any protein or protein complex (a complex of two or more proteins that may include other nonprotein molecules).		F
EnsemblPlants Rel 51	TraesCS1A02G371100	TraesCS1A03G0901300		GO:0005515	protein binding	Interacting selectively and non-covalently with any protein or protein complex (a complex of two or more proteins that may include other nonprotein molecules).		F
EnsemblPlants Rel 51	TraesCS1A02G372400	TraesCS1A03G0903700		GO:0005524	ATP binding	Interacting selectively and non-covalently with ATP, adenosine 5'-triphosphate, a universally important coenzyme and enzyme regulator.		F
EnsemblPlants Rel 51	TraesCS1A02G372800	TraesCS1A03G0905200		GO:0005515	protein binding	Interacting selectively and non-covalently with any protein or protein complex (a complex of two or more proteins that may include other nonprotein molecules).		F
EnsemblPlants Rel 51	TraesCS1A02G373500	TraesCS1A03G0906400		GO:0043531	ADP binding	Interacting selectively and non-covalently with ADP, adenosine 5'-diphosphate.		F
EnsemblPlants Rel 51	TraesCS1A02G373700	TraesCS1A03G0906800		GO:0043531	ADP binding	Interacting selectively and non-covalently with ADP, adenosine 5'-diphosphate.		F
EnsemblPlants Rel 51	TraesCS1A02G374200	TraesCS1A03G0907900		GO:0006869	lipid transport	The directed movement of lipids into, out of or within a cell, or between cells, by means of some agent such as a transporter or pore. Lipids are compounds soluble in an organic solvent but not, or sparingly, in an aqueous solvent.		P
EnsemblPlants Rel 51	TraesCS1A02G374300	TraesCS1A03G0908000		GO:0006869	lipid transport	The directed movement of lipids into, out of or within a cell, or between cells, by means of some agent such as a transporter or pore. Lipids are compounds soluble in an organic solvent but not, or sparingly, in an aqueous solvent.		P
EnsemblPlants Rel 51	TraesCS1A02G374400	TraesCS1A03G0908100		GO:0006869	lipid transport	The directed movement of lipids into, out of or within a cell, or between cells, by means of some agent such as a transporter or pore. Lipids are compounds soluble in an organic solvent but not, or sparingly, in an aqueous solvent.		P
EnsemblPlants Rel 51	TraesCS1A02G374500	TraesCS1A03G0908200		GO:0006869	lipid transport	The directed movement of lipids into, out of or within a cell, or between cells, by means of some agent such as a transporter or pore. Lipids are compounds soluble in an organic solvent but not, or sparingly, in an aqueous solvent.		P
EnsemblPlants Rel 51	TraesCS1A02G374600	TraesCS1A03G0908300		GO:0005524	ATP binding	Interacting selectively and non-covalently with ATP, adenosine 5'-triphosphate, a universally important coenzyme and enzyme regulator.		F
EnsemblPlants Rel 51	TraesCS1A02G374800	TraesCS1A03G0908600		GO:0008270	zinc ion binding	Interacting selectively and non-covalently with zinc (Zn) ions.		F
EnsemblPlants Rel 51	TraesCS1A02G375300	TraesCS1A03G0909500		GO:0005515	protein binding	Interacting selectively and non-covalently with any protein or protein complex (a complex of two or more proteins that may include other nonprotein molecules).		F
EnsemblPlants Rel 51	TraesCS1A02G375400	TraesCS1A03G0909800		GO:0005515	protein binding	Interacting selectively and non-covalently with any protein or protein complex (a complex of two or more proteins that may include other nonprotein molecules).		F
EnsemblPlants Rel 51	TraesCS1A02G375500	TraesCS1A03G0910000		GO:0005515	protein binding	Interacting selectively and non-covalently with any protein or protein complex (a complex of two or more proteins that may include other nonprotein molecules).		F
EnsemblPlants Rel 51	TraesCS1A02G376000	TraesCS1A03G0911000		GO:0005515	protein binding	Interacting selectively and non-covalently with any protein or protein complex (a complex of two or more proteins that may include other nonprotein molecules).		F
EnsemblPlants Rel 51	TraesCS1A02G376300	TraesCS1A03G0911800		GO:0008033	tRNA processing	The process in which a pre-tRNA molecule is converted to a mature tRNA, ready for addition of an aminoacyl group.		P
EnsemblPlants Rel 51	TraesCS1A02G376400	TraesCS1A03G0911900	CRS1 / YhbY (CRM) domain-containing protein [Source:Projected from Arabidopsis thaliana (AT3G18390) UniProtKB/TrEMBL;Acc:Q9LS51]	GO:0003723	RNA binding	Interacting selectively and non-covalently with an RNA molecule or a portion thereof.		F
EnsemblPlants Rel 51	TraesCS1A02G376500	TraesCS1A03G0912000		GO:0010099	regulation of photomorphogenesis	Any process that modulates the rate or extent of photomorphogenesis.		P
EnsemblPlants Rel 51	TraesCS1A02G376600	TraesCS1A03G0912100		GO:0043531	ADP binding	Interacting selectively and non-covalently with ADP, adenosine 5'-diphosphate.		F
EnsemblPlants Rel 51	TraesCS1A02G377800	TraesCS1A03G0913600		GO:0005515	protein binding	Interacting selectively and non-covalently with any protein or protein complex (a complex of two or more proteins that may include other nonprotein molecules).		F
EnsemblPlants Rel 51	TraesCS1A02G378000	TraesCS1A03G0913900		GO:0005515	protein binding	Interacting selectively and non-covalently with any protein or protein complex (a complex of two or more proteins that may include other nonprotein molecules).		F
EnsemblPlants Rel 51	TraesCS1A02G378300	TraesCS1A03G0914400		GO:0008194	UDP-glycosyltransferase activity	Catalysis of the transfer of a glycosyl group from a UDP-sugar to a small hydrophobic molecule.		F
EnsemblPlants Rel 51	TraesCS1A02G378400	TraesCS1A03G0914700		GO:0005515	protein binding	Interacting selectively and non-covalently with any protein or protein complex (a complex of two or more proteins that may include other nonprotein molecules).		F
EnsemblPlants Rel 51	TraesCS1A02G378700	TraesCS1A03G0915300		GO:0005515	protein binding	Interacting selectively and non-covalently with any protein or protein complex (a complex of two or more proteins that may include other nonprotein molecules).		F
EnsemblPlants Rel 51	TraesCS1A02G378800	TraesCS1A03G0915400		GO:0005515	protein binding	Interacting selectively and non-covalently with any protein or protein complex (a complex of two or more proteins that may include other nonprotein molecules).		F
EnsemblPlants Rel 51	TraesCS1A02G379100	TraesCS1A03G0916000		GO:0043531	ADP binding	Interacting selectively and non-covalently with ADP, adenosine 5'-diphosphate.		F
EnsemblPlants Rel 51	TraesCS1A02G379200	TraesCS1A03G0916700		GO:0003676	nucleic acid binding	Interacting selectively and non-covalently with any nucleic acid.		F
EnsemblPlants Rel 51	TraesCS1A02G379500	TraesCS1A03G0917300		GO:0005515	protein binding	Interacting selectively and non-covalently with any protein or protein complex (a complex of two or more proteins that may include other nonprotein molecules).		F
EnsemblPlants Rel 51	TraesCS1A02G379600	TraesCS1A03G0917400		GO:0055085	transmembrane transport	The process in which a solute is transported across a lipid bilayer, from one side of a membrane to the other.		P
EnsemblPlants Rel 51	TraesCS1A02G380000	TraesCS1A03G0918100		GO:0043531	ADP binding	Interacting selectively and non-covalently with ADP, adenosine 5'-diphosphate.		F
EnsemblPlants Rel 51	TraesCS1A02G380500	TraesCS1A03G0918700		GO:0005515	protein binding	Interacting selectively and non-covalently with any protein or protein complex (a complex of two or more proteins that may include other nonprotein molecules).		F
EnsemblPlants Rel 51	TraesCS1A02G380800	TraesCS1A03G0919500		GO:0005515	protein binding	Interacting selectively and non-covalently with any protein or protein complex (a complex of two or more proteins that may include other nonprotein molecules).		F
EnsemblPlants Rel 51	TraesCS1A02G381800	TraesCS1A03G0921200		GO:0051726	regulation of cell cycle	Any process that modulates the rate or extent of progression through the cell cycle.		P
EnsemblPlants Rel 51	TraesCS1A02G381900	TraesCS1A03G0921400		GO:0005515	protein binding	Interacting selectively and non-covalently with any protein or protein complex (a complex of two or more proteins that may include other nonprotein molecules).		F
EnsemblPlants Rel 51	TraesCS1A02G382000	TraesCS1A03G0923400		GO:0005515	protein binding	Interacting selectively and non-covalently with any protein or protein complex (a complex of two or more proteins that may include other nonprotein molecules).		F
EnsemblPlants Rel 51	TraesCS1A02G382100	TraesCS1A03G0923500		GO:0005515	protein binding	Interacting selectively and non-covalently with any protein or protein complex (a complex of two or more proteins that may include other nonprotein molecules).		F
EnsemblPlants Rel 51	TraesCS1A02G382200	TraesCS1A03G0923600		GO:0016788	hydrolase activity, acting on ester bonds	Catalysis of the hydrolysis of any ester bond.		F
EnsemblPlants Rel 51	TraesCS1A02G383300	TraesCS1A03G0925800		GO:0003676	nucleic acid binding	Interacting selectively and non-covalently with any nucleic acid.		F
EnsemblPlants Rel 51	TraesCS1A02G383600	TraesCS1A03G0926600		GO:0016021	integral component of membrane	The component of a membrane consisting of the gene products and protein complexes having at least some part of their peptide sequence embedded in the hydrophobic region of the membrane.		C
EnsemblPlants Rel 51	TraesCS1A02G383700	TraesCS1A03G0926800		GO:0055114	oxidation-reduction process	A metabolic process that results in the removal or addition of one or more electrons to or from a substance, with or without the concomitant removal or addition of a proton or protons.		P
EnsemblPlants Rel 51	TraesCS1A02G384100	TraesCS1A03G0927600		GO:0005515	protein binding	Interacting selectively and non-covalently with any protein or protein complex (a complex of two or more proteins that may include other nonprotein molecules).		F
EnsemblPlants Rel 51	TraesCS1A02G385300	TraesCS1A03G0936400		GO:0005515	protein binding	Interacting selectively and non-covalently with any protein or protein complex (a complex of two or more proteins that may include other nonprotein molecules).		F
EnsemblPlants Rel 51	TraesCS1A02G385900	TraesCS1A03G0940400		GO:0016021	integral component of membrane	The component of a membrane consisting of the gene products and protein complexes having at least some part of their peptide sequence embedded in the hydrophobic region of the membrane.		C
EnsemblPlants Rel 51	TraesCS1A02G386800	TraesCS1A03G0941900		GO:0010274	hydrotropism	Growth or movement in a sessile organism toward or away from water, as of the roots of a plant.		P
EnsemblPlants Rel 51	TraesCS1A02G387000	TraesCS1A03G0942200		GO:0045892	negative regulation of transcription, DNA-templated	Any process that stops, prevents, or reduces the frequency, rate or extent of cellular DNA-templated transcription.		P
EnsemblPlants Rel 51	TraesCS1A02G387100	TraesCS1A03G0942400		GO:0006397	mRNA processing	Any process involved in the conversion of a primary mRNA transcript into one or more mature mRNA(s) prior to translation into polypeptide.		P
EnsemblPlants Rel 51	TraesCS1A02G388800	TraesCS1A03G0948200		GO:0016491	oxidoreductase activity	Catalysis of an oxidation-reduction (redox) reaction, a reversible chemical reaction in which the oxidation state of an atom or atoms within a molecule is altered. One substrate acts as a hydrogen or electron donor and becomes oxidized, while the other acts as hydrogen or electron acceptor and becomes reduced.		F
EnsemblPlants Rel 51	TraesCS1A02G388900	TraesCS1A03G0948400		GO:0005515	protein binding	Interacting selectively and non-covalently with any protein or protein complex (a complex of two or more proteins that may include other nonprotein molecules).		F
EnsemblPlants Rel 51	TraesCS1A02G389200	TraesCS1A03G0948900		GO:0016491	oxidoreductase activity	Catalysis of an oxidation-reduction (redox) reaction, a reversible chemical reaction in which the oxidation state of an atom or atoms within a molecule is altered. One substrate acts as a hydrogen or electron donor and becomes oxidized, while the other acts as hydrogen or electron acceptor and becomes reduced.		F
EnsemblPlants Rel 51	TraesCS1A02G389800	TraesCS1A03G0950200		GO:0003700	DNA-binding transcription factor activity	Interacting selectively and non-covalently with a specific double-stranded genomic DNA sequence (sometimes referred to as a motif) within the regulatory region of a gene to modulate transcription. Regulatory regions include promoters (proximal and distal) and enhancers. Genes are transcriptional units, and include bacterial operons.		F
EnsemblPlants Rel 51	TraesCS1A02G390500	TraesCS1A03G0951500		GO:0016021	integral component of membrane	The component of a membrane consisting of the gene products and protein complexes having at least some part of their peptide sequence embedded in the hydrophobic region of the membrane.		C
EnsemblPlants Rel 51	TraesCS1A02G391200	TraesCS1A03G0953500		GO:0005515	protein binding	Interacting selectively and non-covalently with any protein or protein complex (a complex of two or more proteins that may include other nonprotein molecules).		F
EnsemblPlants Rel 51	TraesCS1A02G391500	TraesCS1A03G0954500		GO:0016021	integral component of membrane	The component of a membrane consisting of the gene products and protein complexes having at least some part of their peptide sequence embedded in the hydrophobic region of the membrane.		C
EnsemblPlants Rel 51	TraesCS1A02G391800	TraesCS1A03G0954800		GO:0005515	protein binding	Interacting selectively and non-covalently with any protein or protein complex (a complex of two or more proteins that may include other nonprotein molecules).		F
EnsemblPlants Rel 51	TraesCS1A02G392100	TraesCS1A03G0955100		GO:0005089	Rho guanyl-nucleotide exchange factor activity	Stimulates the exchange of guanyl nucleotides associated with a GTPase of the Rho family. Under normal cellular physiological conditions, the concentration of GTP is higher than that of GDP, favoring the replacement of GDP by GTP in association with the GTPase.		F
EnsemblPlants Rel 51	TraesCS1A02G394100	TraesCS1A03G0960000		GO:0005509	calcium ion binding	Interacting selectively and non-covalently with calcium ions (Ca2+).		F
EnsemblPlants Rel 51	TraesCS1A02G395400	TraesCS1A03G0963300		GO:0005515	protein binding	Interacting selectively and non-covalently with any protein or protein complex (a complex of two or more proteins that may include other nonprotein molecules).		F
EnsemblPlants Rel 51	TraesCS1A02G395800	TraesCS1A03G0965000		GO:0016021	integral component of membrane	The component of a membrane consisting of the gene products and protein complexes having at least some part of their peptide sequence embedded in the hydrophobic region of the membrane.		C
EnsemblPlants Rel 51	TraesCS1A02G396900	TraesCS1A03G0968200		GO:0015035	protein disulfide oxidoreductase activity	Catalysis of the reaction: a protein with reduced sulfide groups = a protein with oxidized disulfide bonds.		F
EnsemblPlants Rel 51	TraesCS1A02G397600	TraesCS1A03G0970000		GO:0046983	protein dimerization activity	The formation of a protein dimer, a macromolecular structure consists of two noncovalently associated identical or nonidentical subunits.		F
EnsemblPlants Rel 51	TraesCS1A02G398100	TraesCS1A03G0971700		GO:0006952	defense response	Reactions, triggered in response to the presence of a foreign body or the occurrence of an injury, which result in restriction of damage to the organism attacked or prevention/recovery from the infection caused by the attack.		P
EnsemblPlants Rel 51	TraesCS1A02G398500	TraesCS1A03G0972500		GO:0005515	protein binding	Interacting selectively and non-covalently with any protein or protein complex (a complex of two or more proteins that may include other nonprotein molecules).		F
EnsemblPlants Rel 51	TraesCS1A02G398600	TraesCS1A03G0972600		GO:0005515	protein binding	Interacting selectively and non-covalently with any protein or protein complex (a complex of two or more proteins that may include other nonprotein molecules).		F
EnsemblPlants Rel 51	TraesCS1A02G398900	TraesCS1A03G0973200		GO:0005515	protein binding	Interacting selectively and non-covalently with any protein or protein complex (a complex of two or more proteins that may include other nonprotein molecules).		F
EnsemblPlants Rel 51	TraesCS1A02G399000	TraesCS1A03G0973300		GO:0005515	protein binding	Interacting selectively and non-covalently with any protein or protein complex (a complex of two or more proteins that may include other nonprotein molecules).		F
EnsemblPlants Rel 51	TraesCS1A02G399100	TraesCS1A03G0973400		GO:0005515	protein binding	Interacting selectively and non-covalently with any protein or protein complex (a complex of two or more proteins that may include other nonprotein molecules).		F
EnsemblPlants Rel 51	TraesCS1A02G399300	TraesCS1A03G0973800		GO:0005515	protein binding	Interacting selectively and non-covalently with any protein or protein complex (a complex of two or more proteins that may include other nonprotein molecules).		F
EnsemblPlants Rel 51	TraesCS1A02G400000	TraesCS1A03G0974700		GO:0005515	protein binding	Interacting selectively and non-covalently with any protein or protein complex (a complex of two or more proteins that may include other nonprotein molecules).		F
EnsemblPlants Rel 51	TraesCS1A02G400400	TraesCS1A03G0976000		GO:0016791	phosphatase activity	Catalysis of the hydrolysis of phosphoric monoesters, releasing inorganic phosphate.		F
EnsemblPlants Rel 51	TraesCS1A02G400500	TraesCS1A03G0977000		GO:0003824	catalytic activity	Catalysis of a biochemical reaction at physiological temperatures. In biologically catalyzed reactions, the reactants are known as substrates, and the catalysts are naturally occurring macromolecular substances known as enzymes. Enzymes possess specific binding sites for substrates, and are usually composed wholly or largely of protein, but RNA that has catalytic activity (ribozyme) is often also…		F
EnsemblPlants Rel 51	TraesCS1A02G400800	TraesCS1A03G0977700		GO:0005515	protein binding	Interacting selectively and non-covalently with any protein or protein complex (a complex of two or more proteins that may include other nonprotein molecules).		F
EnsemblPlants Rel 51	TraesCS1A02G400900	TraesCS1A03G0977800		GO:0005515	protein binding	Interacting selectively and non-covalently with any protein or protein complex (a complex of two or more proteins that may include other nonprotein molecules).		F
EnsemblPlants Rel 51	TraesCS1A02G401000	TraesCS1A03G0978000		GO:0016021	integral component of membrane	The component of a membrane consisting of the gene products and protein complexes having at least some part of their peptide sequence embedded in the hydrophobic region of the membrane.		C
EnsemblPlants Rel 51	TraesCS1A02G401300	TraesCS1A03G0978700		GO:0016021	integral component of membrane	The component of a membrane consisting of the gene products and protein complexes having at least some part of their peptide sequence embedded in the hydrophobic region of the membrane.		C
EnsemblPlants Rel 51	TraesCS1A02G403000	TraesCS1A03G0986400		GO:0016021	integral component of membrane	The component of a membrane consisting of the gene products and protein complexes having at least some part of their peptide sequence embedded in the hydrophobic region of the membrane.		C
EnsemblPlants Rel 51	TraesCS1A02G403100	TraesCS1A03G0986500		GO:0016021	integral component of membrane	The component of a membrane consisting of the gene products and protein complexes having at least some part of their peptide sequence embedded in the hydrophobic region of the membrane.		C
EnsemblPlants Rel 51	TraesCS1A02G403700	TraesCS1A03G0988000		GO:0004857	enzyme inhibitor activity	Binds to and stops, prevents or reduces the activity of an enzyme.		F
EnsemblPlants Rel 51	TraesCS1A02G403900	TraesCS1A03G0988300		GO:0005515	protein binding	Interacting selectively and non-covalently with any protein or protein complex (a complex of two or more proteins that may include other nonprotein molecules).		F
EnsemblPlants Rel 51	TraesCS1A02G404400	TraesCS1A03G0989900		GO:0005515	protein binding	Interacting selectively and non-covalently with any protein or protein complex (a complex of two or more proteins that may include other nonprotein molecules).		F
EnsemblPlants Rel 51	TraesCS1A02G404900	TraesCS1A03G0991100		GO:0003677	DNA binding	Any molecular function by which a gene product interacts selectively and non-covalently with DNA (deoxyribonucleic acid).		F
EnsemblPlants Rel 51	TraesCS1A02G405700	TraesCS1A03G0992500		GO:0003676	nucleic acid binding	Interacting selectively and non-covalently with any nucleic acid.		F
EnsemblPlants Rel 51	TraesCS1A02G406400	TraesCS1A03G0994500		GO:0016021	integral component of membrane	The component of a membrane consisting of the gene products and protein complexes having at least some part of their peptide sequence embedded in the hydrophobic region of the membrane.		C
EnsemblPlants Rel 51	TraesCS1A02G406600	TraesCS1A03G0994700		GO:0003677	DNA binding	Any molecular function by which a gene product interacts selectively and non-covalently with DNA (deoxyribonucleic acid).		F
EnsemblPlants Rel 51	TraesCS1A02G407100	TraesCS1A03G0995700		GO:0016020	membrane	A lipid bilayer along with all the proteins and protein complexes embedded in it an attached to it.		C
EnsemblPlants Rel 51	TraesCS1A02G408600	TraesCS1A03G1000000		GO:0005515	protein binding	Interacting selectively and non-covalently with any protein or protein complex (a complex of two or more proteins that may include other nonprotein molecules).		F
EnsemblPlants Rel 51	TraesCS1A02G408700	TraesCS1A03G1000100		GO:0005515	protein binding	Interacting selectively and non-covalently with any protein or protein complex (a complex of two or more proteins that may include other nonprotein molecules).		F
EnsemblPlants Rel 51	TraesCS1A02G408800	TraesCS1A03G1000300		GO:0055114	oxidation-reduction process	A metabolic process that results in the removal or addition of one or more electrons to or from a substance, with or without the concomitant removal or addition of a proton or protons.		P
EnsemblPlants Rel 51	TraesCS1A02G409100	TraesCS1A03G1001000		GO:0005515	protein binding	Interacting selectively and non-covalently with any protein or protein complex (a complex of two or more proteins that may include other nonprotein molecules).		F
EnsemblPlants Rel 51	TraesCS1A02G409300	TraesCS1A03G1001400		GO:0043531	ADP binding	Interacting selectively and non-covalently with ADP, adenosine 5'-diphosphate.		F
EnsemblPlants Rel 51	TraesCS1A02G409400	TraesCS1A03G1001500		GO:0043531	ADP binding	Interacting selectively and non-covalently with ADP, adenosine 5'-diphosphate.		F
EnsemblPlants Rel 51	TraesCS1A02G410200	TraesCS1A03G1003300		GO:0009055	electron transfer activity	Any molecular entity that serves as an electron acceptor and electron donor in an electron transport chain. An electron transport chain is a process in which a series of electron carriers operate together to transfer electrons from donors to any of several different terminal electron acceptors to generate a transmembrane electrochemical gradient.		F
EnsemblPlants Rel 51	TraesCS1A02G411500	TraesCS1A03G1005500		GO:0016021	integral component of membrane	The component of a membrane consisting of the gene products and protein complexes having at least some part of their peptide sequence embedded in the hydrophobic region of the membrane.		C
EnsemblPlants Rel 51	TraesCS1A02G412200	TraesCS1A03G1006800		GO:0005515	protein binding	Interacting selectively and non-covalently with any protein or protein complex (a complex of two or more proteins that may include other nonprotein molecules).		F
EnsemblPlants Rel 51	TraesCS1A02G412700	TraesCS1A03G1008200		GO:0008970	phospholipase A1 activity	Catalysis of the reaction: phosphatidylcholine + H2O = 2-acylglycerophosphocholine + a carboxylate.		F
EnsemblPlants Rel 51	TraesCS1A02G414300	TraesCS1A03G1012100		GO:0046872	metal ion binding	Interacting selectively and non-covalently with any metal ion.		F
EnsemblPlants Rel 51	TraesCS1A02G414400	TraesCS1A03G1012400		GO:0046872	metal ion binding	Interacting selectively and non-covalently with any metal ion.		F
EnsemblPlants Rel 51	TraesCS1A02G414800	TraesCS1A03G1012900		GO:0005515	protein binding	Interacting selectively and non-covalently with any protein or protein complex (a complex of two or more proteins that may include other nonprotein molecules).		F
EnsemblPlants Rel 51	TraesCS1A02G415000	TraesCS1A03G1013400		GO:0005615	extracellular space	That part of a multicellular organism outside the cells proper, usually taken to be outside the plasma membranes, and occupied by fluid.		C
EnsemblPlants Rel 51	TraesCS1A02G415600	TraesCS1A03G1015100		GO:0005515	protein binding	Interacting selectively and non-covalently with any protein or protein complex (a complex of two or more proteins that may include other nonprotein molecules).		F
EnsemblPlants Rel 51	TraesCS1A02G415700	TraesCS1A03G1015200		GO:0055085	transmembrane transport	The process in which a solute is transported across a lipid bilayer, from one side of a membrane to the other.		P
EnsemblPlants Rel 51	TraesCS1A02G415800	TraesCS1A03G1015500		GO:0010274	hydrotropism	Growth or movement in a sessile organism toward or away from water, as of the roots of a plant.		P
EnsemblPlants Rel 51	TraesCS1A02G416100	TraesCS1A03G1015800		GO:0005509	calcium ion binding	Interacting selectively and non-covalently with calcium ions (Ca2+).		F
EnsemblPlants Rel 51	TraesCS1A02G416300	TraesCS1A03G1016100		GO:0004857	enzyme inhibitor activity	Binds to and stops, prevents or reduces the activity of an enzyme.		F
EnsemblPlants Rel 51	TraesCS1A02G416400	TraesCS1A03G1016200		GO:0004857	enzyme inhibitor activity	Binds to and stops, prevents or reduces the activity of an enzyme.		F
EnsemblPlants Rel 51	TraesCS1A02G417000	TraesCS1A03G1018200		GO:0043531	ADP binding	Interacting selectively and non-covalently with ADP, adenosine 5'-diphosphate.		F
EnsemblPlants Rel 51	TraesCS1A02G419100	TraesCS1A03G1022400		GO:0003677	DNA binding	Any molecular function by which a gene product interacts selectively and non-covalently with DNA (deoxyribonucleic acid).		F
EnsemblPlants Rel 51	TraesCS1A02G419200	TraesCS1A03G1023000		GO:0003677	DNA binding	Any molecular function by which a gene product interacts selectively and non-covalently with DNA (deoxyribonucleic acid).		F
EnsemblPlants Rel 51	TraesCS1A02G420300	TraesCS1A03G1025600		GO:0005515	protein binding	Interacting selectively and non-covalently with any protein or protein complex (a complex of two or more proteins that may include other nonprotein molecules).		F
EnsemblPlants Rel 51	TraesCS1A02G420400	TraesCS1A03G1026000		GO:0005515	protein binding	Interacting selectively and non-covalently with any protein or protein complex (a complex of two or more proteins that may include other nonprotein molecules).		F
EnsemblPlants Rel 51	TraesCS1A02G420500	TraesCS1A03G1026200		GO:0003677	DNA binding	Any molecular function by which a gene product interacts selectively and non-covalently with DNA (deoxyribonucleic acid).		F
EnsemblPlants Rel 51	TraesCS1A02G420800	TraesCS1A03G1026800		GO:0016021	integral component of membrane	The component of a membrane consisting of the gene products and protein complexes having at least some part of their peptide sequence embedded in the hydrophobic region of the membrane.		C
EnsemblPlants Rel 51	TraesCS1A02G421700	TraesCS1A03G1028400		GO:0005525	GTP binding	Interacting selectively and non-covalently with GTP, guanosine triphosphate.		F
EnsemblPlants Rel 51	TraesCS1A02G422300	TraesCS1A03G1029200		GO:0008270	zinc ion binding	Interacting selectively and non-covalently with zinc (Zn) ions.		F
EnsemblPlants Rel 51	TraesCS1A02G423300	TraesCS1A03G1031000		GO:0003677	DNA binding	Any molecular function by which a gene product interacts selectively and non-covalently with DNA (deoxyribonucleic acid).		F
EnsemblPlants Rel 51	TraesCS1A02G423400	TraesCS1A03G1031100		GO:0005886	plasma membrane	The membrane surrounding a cell that separates the cell from its external environment. It consists of a phospholipid bilayer and associated proteins.		C
EnsemblPlants Rel 51	TraesCS1A02G423700	TraesCS1A03G1031500		GO:0016021	integral component of membrane	The component of a membrane consisting of the gene products and protein complexes having at least some part of their peptide sequence embedded in the hydrophobic region of the membrane.		C
EnsemblPlants Rel 51	TraesCS1A02G423800	TraesCS1A03G1031600		GO:0009269	response to desiccation	Any process that results in a change in state or activity of a cell or an organism (in terms of movement, secretion, enzyme production, gene expression, etc.) as a result of a desiccation stimulus, extreme dryness resulting from the prolonged deprivation of water.		P
EnsemblPlants Rel 51	TraesCS1A02G424700	TraesCS1A03G1032300		GO:0005515	protein binding	Interacting selectively and non-covalently with any protein or protein complex (a complex of two or more proteins that may include other nonprotein molecules).		F
EnsemblPlants Rel 51	TraesCS1A02G425200	TraesCS1A03G1035100		GO:1900150	regulation of defense response to fungus	Any process that modulates the frequency, rate or extent of defense response to fungus.		P
EnsemblPlants Rel 51	TraesCS1A02G425300	TraesCS1A03G1035200		GO:0016021	integral component of membrane	The component of a membrane consisting of the gene products and protein complexes having at least some part of their peptide sequence embedded in the hydrophobic region of the membrane.		C
EnsemblPlants Rel 51	TraesCS1A02G425400	TraesCS1A03G1035300		GO:0016021	integral component of membrane	The component of a membrane consisting of the gene products and protein complexes having at least some part of their peptide sequence embedded in the hydrophobic region of the membrane.		C
EnsemblPlants Rel 51	TraesCS1A02G425700	TraesCS1A03G1035600		GO:0005515	protein binding	Interacting selectively and non-covalently with any protein or protein complex (a complex of two or more proteins that may include other nonprotein molecules).		F
EnsemblPlants Rel 51	TraesCS1A02G425800	TraesCS1A03G1035700		GO:0043531	ADP binding	Interacting selectively and non-covalently with ADP, adenosine 5'-diphosphate.		F
EnsemblPlants Rel 51	TraesCS1A02G425900	TraesCS1A03G1036900		GO:0043531	ADP binding	Interacting selectively and non-covalently with ADP, adenosine 5'-diphosphate.		F
EnsemblPlants Rel 51	TraesCS1A02G426000	TraesCS1A03G1037100		GO:0043531	ADP binding	Interacting selectively and non-covalently with ADP, adenosine 5'-diphosphate.		F
EnsemblPlants Rel 51	TraesCS1A02G426800	TraesCS1A03G1038800		GO:0016021	integral component of membrane	The component of a membrane consisting of the gene products and protein complexes having at least some part of their peptide sequence embedded in the hydrophobic region of the membrane.		C
EnsemblPlants Rel 51	TraesCS1A02G427300	TraesCS1A03G1040300		GO:0005515	protein binding	Interacting selectively and non-covalently with any protein or protein complex (a complex of two or more proteins that may include other nonprotein molecules).		F
EnsemblPlants Rel 51	TraesCS1A02G427600	TraesCS1A03G1040800		GO:0003677	DNA binding	Any molecular function by which a gene product interacts selectively and non-covalently with DNA (deoxyribonucleic acid).		F
EnsemblPlants Rel 51	TraesCS1A02G428100	TraesCS1A03G1041800		GO:0016787	hydrolase activity	Catalysis of the hydrolysis of various bonds, e.g. C-O, C-N, C-C, phosphoric anhydride bonds, etc. Hydrolase is the systematic name for any enzyme of EC class 3.		F
EnsemblPlants Rel 51	TraesCS1A02G428300	TraesCS1A03G1042000		GO:0005515	protein binding	Interacting selectively and non-covalently with any protein or protein complex (a complex of two or more proteins that may include other nonprotein molecules).		F
EnsemblPlants Rel 51	TraesCS1A02G428500	TraesCS1A03G1042900		GO:0008270	zinc ion binding	Interacting selectively and non-covalently with zinc (Zn) ions.		F
EnsemblPlants Rel 51	TraesCS1A02G428600	TraesCS1A03G1043000		GO:0005515	protein binding	Interacting selectively and non-covalently with any protein or protein complex (a complex of two or more proteins that may include other nonprotein molecules).		F
EnsemblPlants Rel 51	TraesCS1A02G429400	TraesCS1A03G1044100		GO:0016021	integral component of membrane	The component of a membrane consisting of the gene products and protein complexes having at least some part of their peptide sequence embedded in the hydrophobic region of the membrane.		C
EnsemblPlants Rel 51	TraesCS1A02G429500	TraesCS1A03G1044400		GO:0016021	integral component of membrane	The component of a membrane consisting of the gene products and protein complexes having at least some part of their peptide sequence embedded in the hydrophobic region of the membrane.		C
EnsemblPlants Rel 51	TraesCS1A02G429600	TraesCS1A03G1044700		GO:0016021	integral component of membrane	The component of a membrane consisting of the gene products and protein complexes having at least some part of their peptide sequence embedded in the hydrophobic region of the membrane.		C
EnsemblPlants Rel 51	TraesCS1A02G430400	TraesCS1A03G1045900	H3K4-specific demethylase, JmjC domain-containing protein, Control of stem elongation, Control of transposon activity, Panicle developmen [Source: Projected from Oryza sativa (Os05g0196500)]	GO:0005634	nucleus	A membrane-bounded organelle of eukaryotic cells in which chromosomes are housed and replicated. In most cells, the nucleus contains all of the cell's chromosomes except the organellar chromosomes, and is the site of RNA synthesis and processing. In some species, or in specialized cell types, RNA metabolism or DNA replication may be absent.		C
EnsemblPlants Rel 51	TraesCS1A02G430800	TraesCS1A03G1047100		GO:0008270	zinc ion binding	Interacting selectively and non-covalently with zinc (Zn) ions.		F
EnsemblPlants Rel 51	TraesCS1A02G431000	TraesCS1A03G1047400		GO:0005515	protein binding	Interacting selectively and non-covalently with any protein or protein complex (a complex of two or more proteins that may include other nonprotein molecules).		F
EnsemblPlants Rel 51	TraesCS1A02G431100	TraesCS1A03G1047800		GO:0005515	protein binding	Interacting selectively and non-covalently with any protein or protein complex (a complex of two or more proteins that may include other nonprotein molecules).		F
EnsemblPlants Rel 51	TraesCS1A02G431200	TraesCS1A03G1048100		GO:0005515	protein binding	Interacting selectively and non-covalently with any protein or protein complex (a complex of two or more proteins that may include other nonprotein molecules).		F
EnsemblPlants Rel 51	TraesCS1A02G431800	TraesCS1A03G1050300		GO:0005515	protein binding	Interacting selectively and non-covalently with any protein or protein complex (a complex of two or more proteins that may include other nonprotein molecules).		F
EnsemblPlants Rel 51	TraesCS1A02G431900	TraesCS1A03G1050700		GO:0005515	protein binding	Interacting selectively and non-covalently with any protein or protein complex (a complex of two or more proteins that may include other nonprotein molecules).		F
EnsemblPlants Rel 51	TraesCS1A02G432200	TraesCS1A03G1051100		GO:0016021	integral component of membrane	The component of a membrane consisting of the gene products and protein complexes having at least some part of their peptide sequence embedded in the hydrophobic region of the membrane.		C
EnsemblPlants Rel 51	TraesCS1A02G432900	TraesCS1A03G1052000		GO:0016021	integral component of membrane	The component of a membrane consisting of the gene products and protein complexes having at least some part of their peptide sequence embedded in the hydrophobic region of the membrane.		C
EnsemblPlants Rel 51	TraesCS1A02G433000	TraesCS1A03G1052100		GO:0003723	RNA binding	Interacting selectively and non-covalently with an RNA molecule or a portion thereof.		F
EnsemblPlants Rel 51	TraesCS1A02G433300	TraesCS1A03G1052500		GO:0016021	integral component of membrane	The component of a membrane consisting of the gene products and protein complexes having at least some part of their peptide sequence embedded in the hydrophobic region of the membrane.		C
EnsemblPlants Rel 51	TraesCS1A02G434900	TraesCS1A03G1057200	stachyose synthase [Source:Projected from Arabidopsis thaliana (AT4G01970) TAIR;Acc:AT4G01970]	GO:0003824	catalytic activity	Catalysis of a biochemical reaction at physiological temperatures. In biologically catalyzed reactions, the reactants are known as substrates, and the catalysts are naturally occurring macromolecular substances known as enzymes. Enzymes possess specific binding sites for substrates, and are usually composed wholly or largely of protein, but RNA that has catalytic activity (ribozyme) is often also…		F
EnsemblPlants Rel 51	TraesCS1A02G435100	TraesCS1A03G1058300		GO:0005509	calcium ion binding	Interacting selectively and non-covalently with calcium ions (Ca2+).		F
EnsemblPlants Rel 51	TraesCS1A02G435600	TraesCS1A03G1059100		GO:0009642	response to light intensity	Any process that results in a change in state or activity of a cell or an organism (in terms of movement, secretion, enzyme production, gene expression, etc.) as a result of a light intensity stimulus.		P
EnsemblPlants Rel 51	TraesCS1A02G435700	TraesCS1A03G1059400		GO:0043531	ADP binding	Interacting selectively and non-covalently with ADP, adenosine 5'-diphosphate.		F
EnsemblPlants Rel 51	TraesCS1A02G435800	TraesCS1A03G1059600		GO:0043531	ADP binding	Interacting selectively and non-covalently with ADP, adenosine 5'-diphosphate.		F
EnsemblPlants Rel 51	TraesCS1A02G435900	TraesCS1A03G1059800		GO:0043531	ADP binding	Interacting selectively and non-covalently with ADP, adenosine 5'-diphosphate.		F
EnsemblPlants Rel 51	TraesCS1A02G436000	TraesCS1A03G1059900		GO:0043531	ADP binding	Interacting selectively and non-covalently with ADP, adenosine 5'-diphosphate.		F
EnsemblPlants Rel 51	TraesCS1A02G436200	TraesCS1A03G1060300		GO:0043531	ADP binding	Interacting selectively and non-covalently with ADP, adenosine 5'-diphosphate.		F
EnsemblPlants Rel 51	TraesCS1A02G436900	TraesCS1A03G1061300		GO:0005515	protein binding	Interacting selectively and non-covalently with any protein or protein complex (a complex of two or more proteins that may include other nonprotein molecules).		F
EnsemblPlants Rel 51	TraesCS1A02G437200	TraesCS1A03G1061600		GO:0043531	ADP binding	Interacting selectively and non-covalently with ADP, adenosine 5'-diphosphate.		F
EnsemblPlants Rel 51	TraesCS1A02G437300	TraesCS1A03G1061700		GO:0016021	integral component of membrane	The component of a membrane consisting of the gene products and protein complexes having at least some part of their peptide sequence embedded in the hydrophobic region of the membrane.		C
EnsemblPlants Rel 51	TraesCS1A02G438000	TraesCS1A03G1063100		GO:0016021	integral component of membrane	The component of a membrane consisting of the gene products and protein complexes having at least some part of their peptide sequence embedded in the hydrophobic region of the membrane.		C
EnsemblPlants Rel 51	TraesCS1A02G438900	TraesCS1A03G1066700		GO:0016021	integral component of membrane	The component of a membrane consisting of the gene products and protein complexes having at least some part of their peptide sequence embedded in the hydrophobic region of the membrane.		C
EnsemblPlants Rel 51	TraesCS1A02G439100	TraesCS1A03G1067100		GO:0016021	integral component of membrane	The component of a membrane consisting of the gene products and protein complexes having at least some part of their peptide sequence embedded in the hydrophobic region of the membrane.		C
EnsemblPlants Rel 51	TraesCS1A02G439200	TraesCS1A03G1067300		GO:0005515	protein binding	Interacting selectively and non-covalently with any protein or protein complex (a complex of two or more proteins that may include other nonprotein molecules).		F
EnsemblPlants Rel 51	TraesCS1A02G439600	TraesCS1A03G1069000		GO:0016021	integral component of membrane	The component of a membrane consisting of the gene products and protein complexes having at least some part of their peptide sequence embedded in the hydrophobic region of the membrane.		C
EnsemblPlants Rel 51	TraesCS1A02G439800	TraesCS1A03G1069400		GO:0016021	integral component of membrane	The component of a membrane consisting of the gene products and protein complexes having at least some part of their peptide sequence embedded in the hydrophobic region of the membrane.		C
EnsemblPlants Rel 51	TraesCS1A02G440300	TraesCS1A03G1071100		GO:0005515	protein binding	Interacting selectively and non-covalently with any protein or protein complex (a complex of two or more proteins that may include other nonprotein molecules).		F
EnsemblPlants Rel 51	TraesCS1A02G440400	TraesCS1A03G1071300		GO:0005515	protein binding	Interacting selectively and non-covalently with any protein or protein complex (a complex of two or more proteins that may include other nonprotein molecules).		F
EnsemblPlants Rel 51	TraesCS1A02G440600	TraesCS1A03G1072000		GO:0005515	protein binding	Interacting selectively and non-covalently with any protein or protein complex (a complex of two or more proteins that may include other nonprotein molecules).		F
EnsemblPlants Rel 51	TraesCS1A02G440800	TraesCS1A03G1072400		GO:0016021	integral component of membrane	The component of a membrane consisting of the gene products and protein complexes having at least some part of their peptide sequence embedded in the hydrophobic region of the membrane.		C
EnsemblPlants Rel 51	TraesCS1A02G441000	TraesCS1A03G1072900		GO:0005515	protein binding	Interacting selectively and non-covalently with any protein or protein complex (a complex of two or more proteins that may include other nonprotein molecules).		F
EnsemblPlants Rel 51	TraesCS1A02G441500	TraesCS1A03G1075600		GO:0016021	integral component of membrane	The component of a membrane consisting of the gene products and protein complexes having at least some part of their peptide sequence embedded in the hydrophobic region of the membrane.		C
EnsemblPlants Rel 51	TraesCS1A02G441900	TraesCS1A03G1077200		GO:0016021	integral component of membrane	The component of a membrane consisting of the gene products and protein complexes having at least some part of their peptide sequence embedded in the hydrophobic region of the membrane.		C
EnsemblPlants Rel 51	TraesCS1A02G442900	TraesCS1A03G1080200		GO:0005515	protein binding	Interacting selectively and non-covalently with any protein or protein complex (a complex of two or more proteins that may include other nonprotein molecules).		F
EnsemblPlants Rel 51	TraesCS1A02G443200	TraesCS1A03G1080600		GO:2000028	regulation of photoperiodism, flowering	Any process that modulates the frequency, rate or extent of photoperiodism, flowering.		P
EnsemblPlants Rel 51	TraesCS1A02G444000	TraesCS1A03G1081700		GO:0005576	extracellular region	The space external to the outermost structure of a cell. For cells without external protective or external encapsulating structures this refers to space outside of the plasma membrane. This term covers the host cell environment outside an intracellular parasite.		C
EnsemblPlants Rel 51	TraesCS1A02G444900	TraesCS1A03G1083900		GO:0016021	integral component of membrane	The component of a membrane consisting of the gene products and protein complexes having at least some part of their peptide sequence embedded in the hydrophobic region of the membrane.		C
EnsemblPlants Rel 51	TraesCS1A02G445600	TraesCS1A03G1085100		GO:0046872	metal ion binding	Interacting selectively and non-covalently with any metal ion.		F
EnsemblPlants Rel 51	TraesCS1B02G000100	TraesCS1B03G0000100		GO:0043531	ADP binding	Interacting selectively and non-covalently with ADP, adenosine 5'-diphosphate.		F
EnsemblPlants Rel 51	TraesCS1B02G000200	TraesCS1B03G0000200		GO:0043531	ADP binding	Interacting selectively and non-covalently with ADP, adenosine 5'-diphosphate.		F
EnsemblPlants Rel 51	TraesCS1B02G000400	TraesCS1B03G0000900		GO:0043531	ADP binding	Interacting selectively and non-covalently with ADP, adenosine 5'-diphosphate.		F
EnsemblPlants Rel 51	TraesCS1B02G000500	TraesCS1B03G0001300		GO:0043531	ADP binding	Interacting selectively and non-covalently with ADP, adenosine 5'-diphosphate.		F
EnsemblPlants Rel 51	TraesCS1B02G002100	TraesCS1B03G0004000		GO:0016021	integral component of membrane	The component of a membrane consisting of the gene products and protein complexes having at least some part of their peptide sequence embedded in the hydrophobic region of the membrane.		C
EnsemblPlants Rel 51	TraesCS1B02G002500	TraesCS1B03G0005100		GO:0043531	ADP binding	Interacting selectively and non-covalently with ADP, adenosine 5'-diphosphate.		F
EnsemblPlants Rel 51	TraesCS1B02G002600	TraesCS1B03G0005300		GO:0005515	protein binding	Interacting selectively and non-covalently with any protein or protein complex (a complex of two or more proteins that may include other nonprotein molecules).		F
EnsemblPlants Rel 51	TraesCS1B02G002700	TraesCS1B03G0005500		GO:0005515	protein binding	Interacting selectively and non-covalently with any protein or protein complex (a complex of two or more proteins that may include other nonprotein molecules).		F
EnsemblPlants Rel 51	TraesCS1B02G002900	TraesCS1B03G0005800		GO:0043531	ADP binding	Interacting selectively and non-covalently with ADP, adenosine 5'-diphosphate.		F
EnsemblPlants Rel 51	TraesCS1B02G003100	TraesCS1B03G0006200		GO:0043531	ADP binding	Interacting selectively and non-covalently with ADP, adenosine 5'-diphosphate.		F
EnsemblPlants Rel 51	TraesCS1B02G003500	TraesCS1B03G0006800		GO:0005515	protein binding	Interacting selectively and non-covalently with any protein or protein complex (a complex of two or more proteins that may include other nonprotein molecules).		F
EnsemblPlants Rel 51	TraesCS1B02G003600	TraesCS1B03G0006900		GO:0043531	ADP binding	Interacting selectively and non-covalently with ADP, adenosine 5'-diphosphate.		F
EnsemblPlants Rel 51	TraesCS1B02G003700	TraesCS1B03G0007200		GO:0043531	ADP binding	Interacting selectively and non-covalently with ADP, adenosine 5'-diphosphate.		F
EnsemblPlants Rel 51	TraesCS1B02G003800	TraesCS1B03G0007300		GO:0016021	integral component of membrane	The component of a membrane consisting of the gene products and protein complexes having at least some part of their peptide sequence embedded in the hydrophobic region of the membrane.		C
EnsemblPlants Rel 51	TraesCS1B02G004600	TraesCS1B03G0009700		GO:0043531	ADP binding	Interacting selectively and non-covalently with ADP, adenosine 5'-diphosphate.		F
EnsemblPlants Rel 51	TraesCS1B02G004900	TraesCS1B03G0010300		GO:0005515	protein binding	Interacting selectively and non-covalently with any protein or protein complex (a complex of two or more proteins that may include other nonprotein molecules).		F
EnsemblPlants Rel 51	TraesCS1B02G005100	TraesCS1B03G0011000		GO:0016021	integral component of membrane	The component of a membrane consisting of the gene products and protein complexes having at least some part of their peptide sequence embedded in the hydrophobic region of the membrane.		C
EnsemblPlants Rel 51	TraesCS1B02G005300	TraesCS1B03G0012000		GO:0016747	transferase activity, transferring acyl groups other than amino-acyl groups	Catalysis of the transfer of an acyl group, other than amino-acyl, from one compound (donor) to another (acceptor).		F
EnsemblPlants Rel 51	TraesCS1B02G006400	TraesCS1B03G0013700		GO:0005515	protein binding	Interacting selectively and non-covalently with any protein or protein complex (a complex of two or more proteins that may include other nonprotein molecules).		F
EnsemblPlants Rel 51	TraesCS1B02G006600	TraesCS1B03G0013900		GO:0007034	vacuolar transport	The directed movement of substances into, out of or within a vacuole.		P
EnsemblPlants Rel 51	TraesCS1B02G006900	TraesCS1B03G0014300		GO:0043531	ADP binding	Interacting selectively and non-covalently with ADP, adenosine 5'-diphosphate.		F
EnsemblPlants Rel 51	TraesCS1B02G007200	TraesCS1B03G0014800		GO:0005515	protein binding	Interacting selectively and non-covalently with any protein or protein complex (a complex of two or more proteins that may include other nonprotein molecules).		F
EnsemblPlants Rel 51	TraesCS1B02G007300	TraesCS1B03G0015000		GO:0005515	protein binding	Interacting selectively and non-covalently with any protein or protein complex (a complex of two or more proteins that may include other nonprotein molecules).		F
EnsemblPlants Rel 51	TraesCS1B02G007600	TraesCS1B03G0015300		GO:0003676	nucleic acid binding	Interacting selectively and non-covalently with any nucleic acid.		F
EnsemblPlants Rel 51	TraesCS1B02G008200	TraesCS1B03G0016200		GO:0007034	vacuolar transport	The directed movement of substances into, out of or within a vacuole.		P
EnsemblPlants Rel 51	TraesCS1B02G008400	TraesCS1B03G0016400		GO:0005515	protein binding	Interacting selectively and non-covalently with any protein or protein complex (a complex of two or more proteins that may include other nonprotein molecules).		F
EnsemblPlants Rel 51	TraesCS1B02G008600	TraesCS1B03G0016700		GO:0005515	protein binding	Interacting selectively and non-covalently with any protein or protein complex (a complex of two or more proteins that may include other nonprotein molecules).		F
EnsemblPlants Rel 51	TraesCS1B02G008800	TraesCS1B03G0016900		GO:0005515	protein binding	Interacting selectively and non-covalently with any protein or protein complex (a complex of two or more proteins that may include other nonprotein molecules).		F
EnsemblPlants Rel 51	TraesCS1B02G008900	TraesCS1B03G0017000		GO:0005515	protein binding	Interacting selectively and non-covalently with any protein or protein complex (a complex of two or more proteins that may include other nonprotein molecules).		F
EnsemblPlants Rel 51	TraesCS1B02G009100	TraesCS1B03G0017500		GO:0005515	protein binding	Interacting selectively and non-covalently with any protein or protein complex (a complex of two or more proteins that may include other nonprotein molecules).		F
EnsemblPlants Rel 51	TraesCS1B02G009300	TraesCS1B03G0017700		GO:0005515	protein binding	Interacting selectively and non-covalently with any protein or protein complex (a complex of two or more proteins that may include other nonprotein molecules).		F
EnsemblPlants Rel 51	TraesCS1B02G009400	TraesCS1B03G0017900		GO:0043531	ADP binding	Interacting selectively and non-covalently with ADP, adenosine 5'-diphosphate.		F
EnsemblPlants Rel 51	TraesCS1B02G009877	TraesCS1B03G0018600		GO:0045735	nutrient reservoir activity	Functions in the storage of nutritious substrates.		F
EnsemblPlants Rel 51	TraesCS1B02G010000	TraesCS1B03G0018800		GO:0043531	ADP binding	Interacting selectively and non-covalently with ADP, adenosine 5'-diphosphate.		F
EnsemblPlants Rel 51	TraesCS1B02G010100	TraesCS1B03G0018900		GO:0043531	ADP binding	Interacting selectively and non-covalently with ADP, adenosine 5'-diphosphate.		F
EnsemblPlants Rel 51	TraesCS1B02G010200	TraesCS1B03G0019200		GO:0005515	protein binding	Interacting selectively and non-covalently with any protein or protein complex (a complex of two or more proteins that may include other nonprotein molecules).		F
EnsemblPlants Rel 51	TraesCS1B02G010300	TraesCS1B03G0019300		GO:0005515	protein binding	Interacting selectively and non-covalently with any protein or protein complex (a complex of two or more proteins that may include other nonprotein molecules).		F
EnsemblPlants Rel 51	TraesCS1B02G010400	TraesCS1B03G0019400	Gamma-gliadin 3 [Source:UniProtKB/TrEMBL;Acc:M9TE79]	GO:0045735	nutrient reservoir activity	Functions in the storage of nutritious substrates.		F
EnsemblPlants Rel 51	TraesCS1B02G010500	TraesCS1B03G0019700	Gamma-gliadin 9 [Source:UniProtKB/TrEMBL;Acc:M9TLK0]	GO:0045735	nutrient reservoir activity	Functions in the storage of nutritious substrates.		F
EnsemblPlants Rel 51	TraesCS1B02G010600	TraesCS1B03G0019800	Delta gliadin-B1 [Source:UniProtKB/TrEMBL;Acc:A0A1D6RER0]	GO:0045735	nutrient reservoir activity	Functions in the storage of nutritious substrates.		F
EnsemblPlants Rel 51	TraesCS1B02G011000	TraesCS1B03G0020600	Gamma-gliadin B [Source:UniProtKB/Swiss-Prot;Acc:P06659]	GO:0045735	nutrient reservoir activity	Functions in the storage of nutritious substrates.		F
EnsemblPlants Rel 51	TraesCS1B02G011300	TraesCS1B03G0021000		GO:0045735	nutrient reservoir activity	Functions in the storage of nutritious substrates.		F
EnsemblPlants Rel 51	TraesCS1B02G012100	TraesCS1B03G0023700		GO:0043531	ADP binding	Interacting selectively and non-covalently with ADP, adenosine 5'-diphosphate.		F
EnsemblPlants Rel 51	TraesCS1B02G012200	TraesCS1B03G0023900		GO:0043531	ADP binding	Interacting selectively and non-covalently with ADP, adenosine 5'-diphosphate.		F
EnsemblPlants Rel 51	TraesCS1B02G012300	TraesCS1B03G0024000		GO:0005515	protein binding	Interacting selectively and non-covalently with any protein or protein complex (a complex of two or more proteins that may include other nonprotein molecules).		F
EnsemblPlants Rel 51	TraesCS1B02G012400	TraesCS1B03G0024300		GO:0043531	ADP binding	Interacting selectively and non-covalently with ADP, adenosine 5'-diphosphate.		F
EnsemblPlants Rel 51	TraesCS1B02G012500	TraesCS1B03G0024400		GO:0043531	ADP binding	Interacting selectively and non-covalently with ADP, adenosine 5'-diphosphate.		F
EnsemblPlants Rel 51	TraesCS1B02G012600	TraesCS1B03G0024500		GO:0043531	ADP binding	Interacting selectively and non-covalently with ADP, adenosine 5'-diphosphate.		F
EnsemblPlants Rel 51	TraesCS1B02G012700	TraesCS1B03G0024800		GO:0043531	ADP binding	Interacting selectively and non-covalently with ADP, adenosine 5'-diphosphate.		F
EnsemblPlants Rel 51	TraesCS1B02G012800	TraesCS1B03G0025000		GO:0043531	ADP binding	Interacting selectively and non-covalently with ADP, adenosine 5'-diphosphate.		F
EnsemblPlants Rel 51	TraesCS1B02G012900	TraesCS1B03G0025400		GO:0043531	ADP binding	Interacting selectively and non-covalently with ADP, adenosine 5'-diphosphate.		F
EnsemblPlants Rel 51	TraesCS1B02G013100	TraesCS1B03G0025900	Dirigent protein [Source:UniProtKB/TrEMBL;Acc:A0A1D5SKR1]	GO:0048046	apoplast	The cell membranes and intracellular regions in a plant are connected through plasmodesmata, and plants may be described as having two major compartments: the living symplast and the non-living apoplast. The apoplast is external to the plasma membrane and includes cell walls, intercellular spaces and the lumen of dead structures such as xylem vessels. Water and solutes pass freely through it.		C
EnsemblPlants Rel 51	TraesCS1B02G013200	TraesCS1B03G0026200		GO:0030246	carbohydrate binding	Interacting selectively and non-covalently with any carbohydrate, which includes monosaccharides, oligosaccharides and polysaccharides as well as substances derived from monosaccharides by reduction of the carbonyl group (alditols), by oxidation of one or more hydroxy groups to afford the corresponding aldehydes, ketones, or carboxylic acids, or by replacement of one or more hydroxy group(s) by a…		F
EnsemblPlants Rel 51	TraesCS1B02G013600	TraesCS1B03G0027400	Dirigent protein [Source:UniProtKB/TrEMBL;Acc:A0A1D5SJI1]	GO:0048046	apoplast	The cell membranes and intracellular regions in a plant are connected through plasmodesmata, and plants may be described as having two major compartments: the living symplast and the non-living apoplast. The apoplast is external to the plasma membrane and includes cell walls, intercellular spaces and the lumen of dead structures such as xylem vessels. Water and solutes pass freely through it.		C
EnsemblPlants Rel 51	TraesCS1B02G013900	TraesCS1B03G0027900		GO:0005515	protein binding	Interacting selectively and non-covalently with any protein or protein complex (a complex of two or more proteins that may include other nonprotein molecules).		F
EnsemblPlants Rel 51	TraesCS1B02G014300	TraesCS1B03G0028900		GO:0016747	transferase activity, transferring acyl groups other than amino-acyl groups	Catalysis of the transfer of an acyl group, other than amino-acyl, from one compound (donor) to another (acceptor).		F
EnsemblPlants Rel 51	TraesCS1B02G014400	TraesCS1B03G0029300		GO:0043531	ADP binding	Interacting selectively and non-covalently with ADP, adenosine 5'-diphosphate.		F
EnsemblPlants Rel 51	TraesCS1B02G014500	TraesCS1B03G0029400		GO:0043531	ADP binding	Interacting selectively and non-covalently with ADP, adenosine 5'-diphosphate.		F
EnsemblPlants Rel 51	TraesCS1B02G014700	TraesCS1B03G0029700	Dirigent protein [Source:UniProtKB/TrEMBL;Acc:A0A1D5SK88]	GO:0048046	apoplast	The cell membranes and intracellular regions in a plant are connected through plasmodesmata, and plants may be described as having two major compartments: the living symplast and the non-living apoplast. The apoplast is external to the plasma membrane and includes cell walls, intercellular spaces and the lumen of dead structures such as xylem vessels. Water and solutes pass freely through it.		C
EnsemblPlants Rel 51	TraesCS1B02G014900	TraesCS1B03G0031600		GO:0043531	ADP binding	Interacting selectively and non-covalently with ADP, adenosine 5'-diphosphate.		F
EnsemblPlants Rel 51	TraesCS1B02G015300	TraesCS1B03G0030900		GO:0043531	ADP binding	Interacting selectively and non-covalently with ADP, adenosine 5'-diphosphate.		F
EnsemblPlants Rel 51	TraesCS1B02G015800	TraesCS1B03G0032200	Dirigent protein [Source:UniProtKB/TrEMBL;Acc:A0A1D5SJJ4]	GO:0048046	apoplast	The cell membranes and intracellular regions in a plant are connected through plasmodesmata, and plants may be described as having two major compartments: the living symplast and the non-living apoplast. The apoplast is external to the plasma membrane and includes cell walls, intercellular spaces and the lumen of dead structures such as xylem vessels. Water and solutes pass freely through it.		C
EnsemblPlants Rel 51	TraesCS1B02G016000	TraesCS1B03G0032500		GO:0043531	ADP binding	Interacting selectively and non-covalently with ADP, adenosine 5'-diphosphate.		F
EnsemblPlants Rel 51	TraesCS1B02G016100	TraesCS1B03G0032600		GO:0043531	ADP binding	Interacting selectively and non-covalently with ADP, adenosine 5'-diphosphate.		F
EnsemblPlants Rel 51	TraesCS1B02G016500	TraesCS1B03G0034400		GO:0016747	transferase activity, transferring acyl groups other than amino-acyl groups	Catalysis of the transfer of an acyl group, other than amino-acyl, from one compound (donor) to another (acceptor).		F
EnsemblPlants Rel 51	TraesCS1B02G017100	TraesCS1B03G0035400		GO:0016021	integral component of membrane	The component of a membrane consisting of the gene products and protein complexes having at least some part of their peptide sequence embedded in the hydrophobic region of the membrane.		C
EnsemblPlants Rel 51	TraesCS1B02G017300	TraesCS1B03G0035800		GO:0005515	protein binding	Interacting selectively and non-covalently with any protein or protein complex (a complex of two or more proteins that may include other nonprotein molecules).		F
EnsemblPlants Rel 51	TraesCS1B02G017500	TraesCS1B03G0036300		GO:0043531	ADP binding	Interacting selectively and non-covalently with ADP, adenosine 5'-diphosphate.		F
EnsemblPlants Rel 51	TraesCS1B02G017600	TraesCS1B03G0036500		GO:0043531	ADP binding	Interacting selectively and non-covalently with ADP, adenosine 5'-diphosphate.		F
EnsemblPlants Rel 51	TraesCS1B02G017700	TraesCS1B03G0036700		GO:0006952	defense response	Reactions, triggered in response to the presence of a foreign body or the occurrence of an injury, which result in restriction of damage to the organism attacked or prevention/recovery from the infection caused by the attack.		P
EnsemblPlants Rel 51	TraesCS1B02G018000	TraesCS1B03G0037100		GO:0006952	defense response	Reactions, triggered in response to the presence of a foreign body or the occurrence of an injury, which result in restriction of damage to the organism attacked or prevention/recovery from the infection caused by the attack.		P
EnsemblPlants Rel 51	TraesCS1B02G018100	TraesCS1B03G0037200		GO:0006952	defense response	Reactions, triggered in response to the presence of a foreign body or the occurrence of an injury, which result in restriction of damage to the organism attacked or prevention/recovery from the infection caused by the attack.		P
EnsemblPlants Rel 51	TraesCS1B02G019000	TraesCS1B03G0038700		GO:0043531	ADP binding	Interacting selectively and non-covalently with ADP, adenosine 5'-diphosphate.		F
EnsemblPlants Rel 51	TraesCS1B02G020100	TraesCS1B03G0040500		GO:0005515	protein binding	Interacting selectively and non-covalently with any protein or protein complex (a complex of two or more proteins that may include other nonprotein molecules).		F
EnsemblPlants Rel 51	TraesCS1B02G020300	TraesCS1B03G0041000		GO:0043531	ADP binding	Interacting selectively and non-covalently with ADP, adenosine 5'-diphosphate.		F
EnsemblPlants Rel 51	TraesCS1B02G020400	TraesCS1B03G0041100		GO:0043531	ADP binding	Interacting selectively and non-covalently with ADP, adenosine 5'-diphosphate.		F
EnsemblPlants Rel 51	TraesCS1B02G020900	TraesCS1B03G0042000		GO:0043531	ADP binding	Interacting selectively and non-covalently with ADP, adenosine 5'-diphosphate.		F
EnsemblPlants Rel 51	TraesCS1B02G021500	TraesCS1B03G0042800		GO:0043531	ADP binding	Interacting selectively and non-covalently with ADP, adenosine 5'-diphosphate.		F
EnsemblPlants Rel 51	TraesCS1B02G021700	TraesCS1B03G0043100		GO:0016021	integral component of membrane	The component of a membrane consisting of the gene products and protein complexes having at least some part of their peptide sequence embedded in the hydrophobic region of the membrane.		C
EnsemblPlants Rel 51	TraesCS1B02G021900	TraesCS1B03G0043300		GO:0043531	ADP binding	Interacting selectively and non-covalently with ADP, adenosine 5'-diphosphate.		F
EnsemblPlants Rel 51	TraesCS1B02G022100	TraesCS1B03G0043700		GO:0043531	ADP binding	Interacting selectively and non-covalently with ADP, adenosine 5'-diphosphate.		F
EnsemblPlants Rel 51	TraesCS1B02G022200	TraesCS1B03G0044100		GO:0043531	ADP binding	Interacting selectively and non-covalently with ADP, adenosine 5'-diphosphate.		F
EnsemblPlants Rel 51	TraesCS1B02G022700	TraesCS1B03G0044800		GO:0003676	nucleic acid binding	Interacting selectively and non-covalently with any nucleic acid.		F
EnsemblPlants Rel 51	TraesCS1B02G022900	TraesCS1B03G0045500		GO:0005515	protein binding	Interacting selectively and non-covalently with any protein or protein complex (a complex of two or more proteins that may include other nonprotein molecules).		F
EnsemblPlants Rel 51	TraesCS1B02G023100	TraesCS1B03G0045900		GO:0043531	ADP binding	Interacting selectively and non-covalently with ADP, adenosine 5'-diphosphate.		F
EnsemblPlants Rel 51	TraesCS1B02G023200	TraesCS1B03G0046000		GO:0008171	O-methyltransferase activity	Catalysis of the transfer of a methyl group to the oxygen atom of an acceptor molecule.		F
EnsemblPlants Rel 51	TraesCS1B02G023400	TraesCS1B03G0046800		GO:0003677	DNA binding	Any molecular function by which a gene product interacts selectively and non-covalently with DNA (deoxyribonucleic acid).		F
EnsemblPlants Rel 51	TraesCS1B02G023500	TraesCS1B03G0047300		GO:0003677	DNA binding	Any molecular function by which a gene product interacts selectively and non-covalently with DNA (deoxyribonucleic acid).		F
EnsemblPlants Rel 51	TraesCS1B02G023700	TraesCS1B03G0047600		GO:0008194	UDP-glycosyltransferase activity	Catalysis of the transfer of a glycosyl group from a UDP-sugar to a small hydrophobic molecule.		F
EnsemblPlants Rel 51	TraesCS1B02G024200	TraesCS1B03G0048500		GO:0006952	defense response	Reactions, triggered in response to the presence of a foreign body or the occurrence of an injury, which result in restriction of damage to the organism attacked or prevention/recovery from the infection caused by the attack.		P
EnsemblPlants Rel 51	TraesCS1B02G024400	TraesCS1B03G0048700		GO:0046872	metal ion binding	Interacting selectively and non-covalently with any metal ion.		F
EnsemblPlants Rel 51	TraesCS1B02G024600	TraesCS1B03G0048900		GO:0009507	chloroplast	A chlorophyll-containing plastid with thylakoids organized into grana and frets, or stroma thylakoids, and embedded in a stroma.		C
EnsemblPlants Rel 51	TraesCS1B02G024800	TraesCS1B03G0049400		GO:0016747	transferase activity, transferring acyl groups other than amino-acyl groups	Catalysis of the transfer of an acyl group, other than amino-acyl, from one compound (donor) to another (acceptor).		F
EnsemblPlants Rel 51	TraesCS1B02G024900	TraesCS1B03G0049600		GO:0016747	transferase activity, transferring acyl groups other than amino-acyl groups	Catalysis of the transfer of an acyl group, other than amino-acyl, from one compound (donor) to another (acceptor).		F
EnsemblPlants Rel 51	TraesCS1B02G025500	TraesCS1B03G0051100		GO:0043531	ADP binding	Interacting selectively and non-covalently with ADP, adenosine 5'-diphosphate.		F
EnsemblPlants Rel 51	TraesCS1B02G025800	TraesCS1B03G0051500	Fatty acyl-CoA reductase [Source:UniProtKB/TrEMBL;Acc:A0A341NW60]	GO:0080019	fatty-acyl-CoA reductase (alcohol-forming) activity	Catalysis of the reaction: a very long chain fatty acyl-CoA + NADPH + H+ = a very long chain primary alcohol + NADP+ + CoA.		F
EnsemblPlants Rel 51	TraesCS1B02G026300	TraesCS1B03G0052600		GO:0043531	ADP binding	Interacting selectively and non-covalently with ADP, adenosine 5'-diphosphate.		F
EnsemblPlants Rel 51	TraesCS1B02G026400	TraesCS1B03G0052700		GO:0043531	ADP binding	Interacting selectively and non-covalently with ADP, adenosine 5'-diphosphate.		F
EnsemblPlants Rel 51	TraesCS1B02G027000	TraesCS1B03G0054200		GO:0043531	ADP binding	Interacting selectively and non-covalently with ADP, adenosine 5'-diphosphate.		F
EnsemblPlants Rel 51	TraesCS1B02G027300	TraesCS1B03G0054700		GO:0043531	ADP binding	Interacting selectively and non-covalently with ADP, adenosine 5'-diphosphate.		F
EnsemblPlants Rel 51	TraesCS1B02G027500	TraesCS1B03G0055700		GO:0043531	ADP binding	Interacting selectively and non-covalently with ADP, adenosine 5'-diphosphate.		F
EnsemblPlants Rel 51	TraesCS1B02G028800	TraesCS1B03G0057700		GO:0005515	protein binding	Interacting selectively and non-covalently with any protein or protein complex (a complex of two or more proteins that may include other nonprotein molecules).		F
EnsemblPlants Rel 51	TraesCS1B02G028900	TraesCS1B03G0057800		GO:0005515	protein binding	Interacting selectively and non-covalently with any protein or protein complex (a complex of two or more proteins that may include other nonprotein molecules).		F
EnsemblPlants Rel 51	TraesCS1B02G029200	TraesCS1B03G0058200		GO:0005515	protein binding	Interacting selectively and non-covalently with any protein or protein complex (a complex of two or more proteins that may include other nonprotein molecules).		F
EnsemblPlants Rel 51	TraesCS1B02G029600	TraesCS1B03G0059300		GO:0005515	protein binding	Interacting selectively and non-covalently with any protein or protein complex (a complex of two or more proteins that may include other nonprotein molecules).		F
EnsemblPlants Rel 51	TraesCS1B02G030200	TraesCS1B03G0060600		GO:0005515	protein binding	Interacting selectively and non-covalently with any protein or protein complex (a complex of two or more proteins that may include other nonprotein molecules).		F
EnsemblPlants Rel 51	TraesCS1B02G030900	TraesCS1B03G0062100		GO:0043531	ADP binding	Interacting selectively and non-covalently with ADP, adenosine 5'-diphosphate.		F
EnsemblPlants Rel 51	TraesCS1B02G031600	TraesCS1B03G0063400		GO:0016021	integral component of membrane	The component of a membrane consisting of the gene products and protein complexes having at least some part of their peptide sequence embedded in the hydrophobic region of the membrane.		C
EnsemblPlants Rel 51	TraesCS1B02G032200	TraesCS1B03G0064500		GO:0016021	integral component of membrane	The component of a membrane consisting of the gene products and protein complexes having at least some part of their peptide sequence embedded in the hydrophobic region of the membrane.		C
EnsemblPlants Rel 51	TraesCS1B02G032600	TraesCS1B03G0065500		GO:0046872	metal ion binding	Interacting selectively and non-covalently with any metal ion.		F
EnsemblPlants Rel 51	TraesCS1B02G032700	TraesCS1B03G0065600		GO:0043531	ADP binding	Interacting selectively and non-covalently with ADP, adenosine 5'-diphosphate.		F
EnsemblPlants Rel 51	TraesCS1B02G033400	TraesCS1B03G0066700		GO:0016791	phosphatase activity	Catalysis of the hydrolysis of phosphoric monoesters, releasing inorganic phosphate.		F
EnsemblPlants Rel 51	TraesCS1B02G033500	TraesCS1B03G0066800		GO:0005525	GTP binding	Interacting selectively and non-covalently with GTP, guanosine triphosphate.		F
EnsemblPlants Rel 51	TraesCS1B02G033700	TraesCS1B03G0067600		GO:0016747	transferase activity, transferring acyl groups other than amino-acyl groups	Catalysis of the transfer of an acyl group, other than amino-acyl, from one compound (donor) to another (acceptor).		F
EnsemblPlants Rel 51	TraesCS1B02G034500	TraesCS1B03G0068600		GO:0043531	ADP binding	Interacting selectively and non-covalently with ADP, adenosine 5'-diphosphate.		F
EnsemblPlants Rel 51	TraesCS1B02G034700	TraesCS1B03G0068800		GO:0043531	ADP binding	Interacting selectively and non-covalently with ADP, adenosine 5'-diphosphate.		F
EnsemblPlants Rel 51	TraesCS1B02G035200	TraesCS1B03G0070000		GO:0043531	ADP binding	Interacting selectively and non-covalently with ADP, adenosine 5'-diphosphate.		F
EnsemblPlants Rel 51	TraesCS1B02G035500	TraesCS1B03G0070900		GO:0043531	ADP binding	Interacting selectively and non-covalently with ADP, adenosine 5'-diphosphate.		F
EnsemblPlants Rel 51	TraesCS1B02G035600	TraesCS1B03G0071200		GO:0043531	ADP binding	Interacting selectively and non-covalently with ADP, adenosine 5'-diphosphate.		F
EnsemblPlants Rel 51	TraesCS1B02G035700	TraesCS1B03G0071400		GO:0043531	ADP binding	Interacting selectively and non-covalently with ADP, adenosine 5'-diphosphate.		F
EnsemblPlants Rel 51	TraesCS1B02G036000	TraesCS1B03G0071700	Dirigent protein [Source:UniProtKB/TrEMBL;Acc:A0A1D5SL09]	GO:0048046	apoplast	The cell membranes and intracellular regions in a plant are connected through plasmodesmata, and plants may be described as having two major compartments: the living symplast and the non-living apoplast. The apoplast is external to the plasma membrane and includes cell walls, intercellular spaces and the lumen of dead structures such as xylem vessels. Water and solutes pass freely through it.		C
EnsemblPlants Rel 51	TraesCS1B02G036400	TraesCS1B03G0072800		GO:0003723	RNA binding	Interacting selectively and non-covalently with an RNA molecule or a portion thereof.		F
EnsemblPlants Rel 51	TraesCS1B02G036800	TraesCS1B03G0073500		GO:0043531	ADP binding	Interacting selectively and non-covalently with ADP, adenosine 5'-diphosphate.		F
EnsemblPlants Rel 51	TraesCS1B02G036900	TraesCS1B03G0074000		GO:0061630	ubiquitin protein ligase activity	Catalysis of the transfer of ubiquitin to a substrate protein via the reaction X-ubiquitin + S -> X + S-ubiquitin, where X is either an E2 or E3 enzyme, the X-ubiquitin linkage is a thioester bond, and the S-ubiquitin linkage is an amide bond: an isopeptide bond between the C-terminal glycine of ubiquitin and the epsilon-amino group of lysine residues in the substrate or, in the linear extension …		F
EnsemblPlants Rel 51	TraesCS1B02G037700	TraesCS1B03G0075300		GO:0016021	integral component of membrane	The component of a membrane consisting of the gene products and protein complexes having at least some part of their peptide sequence embedded in the hydrophobic region of the membrane.		C
EnsemblPlants Rel 51	TraesCS1B02G038200	TraesCS1B03G0076400		GO:0005515	protein binding	Interacting selectively and non-covalently with any protein or protein complex (a complex of two or more proteins that may include other nonprotein molecules).		F
EnsemblPlants Rel 51	TraesCS1B02G038300	TraesCS1B03G0077000		GO:0005515	protein binding	Interacting selectively and non-covalently with any protein or protein complex (a complex of two or more proteins that may include other nonprotein molecules).		F
EnsemblPlants Rel 51	TraesCS1B02G038400	TraesCS1B03G0077200		GO:0005515	protein binding	Interacting selectively and non-covalently with any protein or protein complex (a complex of two or more proteins that may include other nonprotein molecules).		F
EnsemblPlants Rel 51	TraesCS1B02G038500	TraesCS1B03G0077300		GO:0005515	protein binding	Interacting selectively and non-covalently with any protein or protein complex (a complex of two or more proteins that may include other nonprotein molecules).		F
EnsemblPlants Rel 51	TraesCS1B02G038600	TraesCS1B03G0077700		GO:0005515	protein binding	Interacting selectively and non-covalently with any protein or protein complex (a complex of two or more proteins that may include other nonprotein molecules).		F
EnsemblPlants Rel 51	TraesCS1B02G039100	TraesCS1B03G0078800		GO:0005515	protein binding	Interacting selectively and non-covalently with any protein or protein complex (a complex of two or more proteins that may include other nonprotein molecules).		F
EnsemblPlants Rel 51	TraesCS1B02G039200	TraesCS1B03G0079100		GO:0005515	protein binding	Interacting selectively and non-covalently with any protein or protein complex (a complex of two or more proteins that may include other nonprotein molecules).		F
EnsemblPlants Rel 51	TraesCS1B02G039620	TraesCS1B03G0080100		GO:0005515	protein binding	Interacting selectively and non-covalently with any protein or protein complex (a complex of two or more proteins that may include other nonprotein molecules).		F
EnsemblPlants Rel 51	TraesCS1B02G039625	TraesCS1B03G0080200		GO:0005515	protein binding	Interacting selectively and non-covalently with any protein or protein complex (a complex of two or more proteins that may include other nonprotein molecules).		F
EnsemblPlants Rel 51	TraesCS1B02G039700	TraesCS1B03G0080300		GO:0005515	protein binding	Interacting selectively and non-covalently with any protein or protein complex (a complex of two or more proteins that may include other nonprotein molecules).		F
EnsemblPlants Rel 51	TraesCS1B02G041200	TraesCS1B03G0084600		GO:0005515	protein binding	Interacting selectively and non-covalently with any protein or protein complex (a complex of two or more proteins that may include other nonprotein molecules).		F
EnsemblPlants Rel 51	TraesCS1B02G041300	TraesCS1B03G0084700		GO:0005515	protein binding	Interacting selectively and non-covalently with any protein or protein complex (a complex of two or more proteins that may include other nonprotein molecules).		F
EnsemblPlants Rel 51	TraesCS1B02G041500	TraesCS1B03G0085400		GO:0009909	regulation of flower development	Any process that modulates the frequency, rate or extent of flower development.		P
EnsemblPlants Rel 51	TraesCS1B02G042200	TraesCS1B03G0086800		GO:0046872	metal ion binding	Interacting selectively and non-covalently with any metal ion.		F
EnsemblPlants Rel 51	TraesCS1B02G042400	TraesCS1B03G0087000		GO:0005515	protein binding	Interacting selectively and non-covalently with any protein or protein complex (a complex of two or more proteins that may include other nonprotein molecules).		F
EnsemblPlants Rel 51	TraesCS1B02G042500	TraesCS1B03G0087200		GO:0043531	ADP binding	Interacting selectively and non-covalently with ADP, adenosine 5'-diphosphate.		F
EnsemblPlants Rel 51	TraesCS1B02G042600	TraesCS1B03G0087300	Dirigent protein [Source:UniProtKB/TrEMBL;Acc:A0A1D5SLV1]	GO:0048046	apoplast	The cell membranes and intracellular regions in a plant are connected through plasmodesmata, and plants may be described as having two major compartments: the living symplast and the non-living apoplast. The apoplast is external to the plasma membrane and includes cell walls, intercellular spaces and the lumen of dead structures such as xylem vessels. Water and solutes pass freely through it.		C
EnsemblPlants Rel 51	TraesCS1B02G042900	TraesCS1B03G0088000	Dirigent protein [Source:UniProtKB/TrEMBL;Acc:A0A1D5SNM1]	GO:0048046	apoplast	The cell membranes and intracellular regions in a plant are connected through plasmodesmata, and plants may be described as having two major compartments: the living symplast and the non-living apoplast. The apoplast is external to the plasma membrane and includes cell walls, intercellular spaces and the lumen of dead structures such as xylem vessels. Water and solutes pass freely through it.		C
EnsemblPlants Rel 51	TraesCS1B02G043100	TraesCS1B03G0089000	Dirigent protein [Source:UniProtKB/TrEMBL;Acc:A0A1D6DK67]	GO:0048046	apoplast	The cell membranes and intracellular regions in a plant are connected through plasmodesmata, and plants may be described as having two major compartments: the living symplast and the non-living apoplast. The apoplast is external to the plasma membrane and includes cell walls, intercellular spaces and the lumen of dead structures such as xylem vessels. Water and solutes pass freely through it.		C
EnsemblPlants Rel 51	TraesCS1B02G044100	TraesCS1B03G0093100		GO:0043531	ADP binding	Interacting selectively and non-covalently with ADP, adenosine 5'-diphosphate.		F
EnsemblPlants Rel 51	TraesCS1B02G044200	TraesCS1B03G0093200		GO:0043531	ADP binding	Interacting selectively and non-covalently with ADP, adenosine 5'-diphosphate.		F
EnsemblPlants Rel 51	TraesCS1B02G044900	TraesCS1B03G0097200		GO:0005515	protein binding	Interacting selectively and non-covalently with any protein or protein complex (a complex of two or more proteins that may include other nonprotein molecules).		F
EnsemblPlants Rel 51	TraesCS1B02G045800	TraesCS1B03G0099900		GO:0043531	ADP binding	Interacting selectively and non-covalently with ADP, adenosine 5'-diphosphate.		F
EnsemblPlants Rel 51	TraesCS1B02G045900	TraesCS1B03G0100000		GO:0043531	ADP binding	Interacting selectively and non-covalently with ADP, adenosine 5'-diphosphate.		F
EnsemblPlants Rel 51	TraesCS1B02G046000	TraesCS1B03G0100400		GO:0043531	ADP binding	Interacting selectively and non-covalently with ADP, adenosine 5'-diphosphate.		F
EnsemblPlants Rel 51	TraesCS1B02G046200	TraesCS1B03G0101000	Chalcone-flavonone isomerase family protein [Source:UniProtKB/TrEMBL;Acc:W5AAU0]	GO:0016872	intramolecular lyase activity	The catalysis of certain rearrangements of a molecule to break or form a ring.		F
EnsemblPlants Rel 51	TraesCS1B02G046500	TraesCS1B03G0102400		GO:0043531	ADP binding	Interacting selectively and non-covalently with ADP, adenosine 5'-diphosphate.		F
EnsemblPlants Rel 51	TraesCS1B02G046600	TraesCS1B03G0102600		GO:0005515	protein binding	Interacting selectively and non-covalently with any protein or protein complex (a complex of two or more proteins that may include other nonprotein molecules).		F
EnsemblPlants Rel 51	TraesCS1B02G046800	TraesCS1B03G0103100		GO:0005515	protein binding	Interacting selectively and non-covalently with any protein or protein complex (a complex of two or more proteins that may include other nonprotein molecules).		F
EnsemblPlants Rel 51	TraesCS1B02G047100	TraesCS1B03G0104100		GO:0005515	protein binding	Interacting selectively and non-covalently with any protein or protein complex (a complex of two or more proteins that may include other nonprotein molecules).		F
EnsemblPlants Rel 51	TraesCS1B02G047400	TraesCS1B03G0105600		GO:0055114	oxidation-reduction process	A metabolic process that results in the removal or addition of one or more electrons to or from a substance, with or without the concomitant removal or addition of a proton or protons.		P
EnsemblPlants Rel 51	TraesCS1B02G047600	TraesCS1B03G0106600		GO:0016021	integral component of membrane	The component of a membrane consisting of the gene products and protein complexes having at least some part of their peptide sequence embedded in the hydrophobic region of the membrane.		C
EnsemblPlants Rel 51	TraesCS1B02G049400	TraesCS1B03G0110200		GO:0043531	ADP binding	Interacting selectively and non-covalently with ADP, adenosine 5'-diphosphate.		F
EnsemblPlants Rel 51	TraesCS1B02G049600	TraesCS1B03G0110900		GO:0008194	UDP-glycosyltransferase activity	Catalysis of the transfer of a glycosyl group from a UDP-sugar to a small hydrophobic molecule.		F
EnsemblPlants Rel 51	TraesCS1B02G049700	TraesCS1B03G0111100		GO:0003677	DNA binding	Any molecular function by which a gene product interacts selectively and non-covalently with DNA (deoxyribonucleic acid).		F
EnsemblPlants Rel 51	TraesCS1B02G049800	TraesCS1B03G0111200		GO:0008171	O-methyltransferase activity	Catalysis of the transfer of a methyl group to the oxygen atom of an acceptor molecule.		F
EnsemblPlants Rel 51	TraesCS1B02G050000	TraesCS1B03G0111700		GO:0043531	ADP binding	Interacting selectively and non-covalently with ADP, adenosine 5'-diphosphate.		F
EnsemblPlants Rel 51	TraesCS1B02G050800	TraesCS1B03G0096200		GO:0005515	protein binding	Interacting selectively and non-covalently with any protein or protein complex (a complex of two or more proteins that may include other nonprotein molecules).		F
EnsemblPlants Rel 51	TraesCS1B02G052000	TraesCS1B03G0116800		GO:0016021	integral component of membrane	The component of a membrane consisting of the gene products and protein complexes having at least some part of their peptide sequence embedded in the hydrophobic region of the membrane.		C
EnsemblPlants Rel 51	TraesCS1B02G052200	TraesCS1B03G0117300		GO:0016021	integral component of membrane	The component of a membrane consisting of the gene products and protein complexes having at least some part of their peptide sequence embedded in the hydrophobic region of the membrane.		C
EnsemblPlants Rel 51	TraesCS1B02G052283	TraesCS1B03G0117400		GO:0005515	protein binding	Interacting selectively and non-covalently with any protein or protein complex (a complex of two or more proteins that may include other nonprotein molecules).		F
EnsemblPlants Rel 51	TraesCS1B02G052300	TraesCS1B03G0117500		GO:0005515	protein binding	Interacting selectively and non-covalently with any protein or protein complex (a complex of two or more proteins that may include other nonprotein molecules).		F
EnsemblPlants Rel 51	TraesCS1B02G052500	TraesCS1B03G0118700		GO:0016747	transferase activity, transferring acyl groups other than amino-acyl groups	Catalysis of the transfer of an acyl group, other than amino-acyl, from one compound (donor) to another (acceptor).		F
EnsemblPlants Rel 51	TraesCS1B02G053100	TraesCS1B03G0120200		GO:0003676	nucleic acid binding	Interacting selectively and non-covalently with any nucleic acid.		F
EnsemblPlants Rel 51	TraesCS1B02G053200	TraesCS1B03G0120400		GO:0003676	nucleic acid binding	Interacting selectively and non-covalently with any nucleic acid.		F
EnsemblPlants Rel 51	TraesCS1B02G053800	TraesCS1B03G0121600		GO:0005515	protein binding	Interacting selectively and non-covalently with any protein or protein complex (a complex of two or more proteins that may include other nonprotein molecules).		F
EnsemblPlants Rel 51	TraesCS1B02G053900	TraesCS1B03G0121900		GO:0005515	protein binding	Interacting selectively and non-covalently with any protein or protein complex (a complex of two or more proteins that may include other nonprotein molecules).		F
EnsemblPlants Rel 51	TraesCS1B02G054000	TraesCS1B03G0122300		GO:0055114	oxidation-reduction process	A metabolic process that results in the removal or addition of one or more electrons to or from a substance, with or without the concomitant removal or addition of a proton or protons.		P
EnsemblPlants Rel 51	TraesCS1B02G055200	TraesCS1B03G0128200		GO:0003677	DNA binding	Any molecular function by which a gene product interacts selectively and non-covalently with DNA (deoxyribonucleic acid).		F
EnsemblPlants Rel 51	TraesCS1B02G055300	TraesCS1B03G0128800		GO:0005515	protein binding	Interacting selectively and non-covalently with any protein or protein complex (a complex of two or more proteins that may include other nonprotein molecules).		F
EnsemblPlants Rel 51	TraesCS1B02G056400	TraesCS1B03G0131900		GO:0005515	protein binding	Interacting selectively and non-covalently with any protein or protein complex (a complex of two or more proteins that may include other nonprotein molecules).		F
EnsemblPlants Rel 51	TraesCS1B02G056500	TraesCS1B03G0132100		GO:0005515	protein binding	Interacting selectively and non-covalently with any protein or protein complex (a complex of two or more proteins that may include other nonprotein molecules).		F
EnsemblPlants Rel 51	TraesCS1B02G056800	TraesCS1B03G0132700		GO:0005515	protein binding	Interacting selectively and non-covalently with any protein or protein complex (a complex of two or more proteins that may include other nonprotein molecules).		F
EnsemblPlants Rel 51	TraesCS1B02G057800	TraesCS1B03G0134800		GO:0003723	RNA binding	Interacting selectively and non-covalently with an RNA molecule or a portion thereof.		F
EnsemblPlants Rel 51	TraesCS1B02G058400	TraesCS1B03G0136700		GO:0005515	protein binding	Interacting selectively and non-covalently with any protein or protein complex (a complex of two or more proteins that may include other nonprotein molecules).		F
EnsemblPlants Rel 51	TraesCS1B02G059000	TraesCS1B03G0139600		GO:0045735	nutrient reservoir activity	Functions in the storage of nutritious substrates.		F
EnsemblPlants Rel 51	TraesCS1B02G059300	TraesCS1B03G0141200		GO:0005515	protein binding	Interacting selectively and non-covalently with any protein or protein complex (a complex of two or more proteins that may include other nonprotein molecules).		F
EnsemblPlants Rel 51	TraesCS1B02G059900	TraesCS1B03G0142900		GO:0016021	integral component of membrane	The component of a membrane consisting of the gene products and protein complexes having at least some part of their peptide sequence embedded in the hydrophobic region of the membrane.		C
EnsemblPlants Rel 51	TraesCS1B02G060200	TraesCS1B03G0144000		GO:0003352	regulation of cilium movement	Any process that modulates the rate, frequency, or extent of cilium movement, the directed, self-propelled movement of a cilium.		P
EnsemblPlants Rel 51	TraesCS1B02G060400	TraesCS1B03G0144700		GO:0005516	calmodulin binding	Interacting selectively and non-covalently with calmodulin, a calcium-binding protein with many roles, both in the calcium-bound and calcium-free states.		F
EnsemblPlants Rel 51	TraesCS1B02G060500	TraesCS1B03G0145000		GO:0005516	calmodulin binding	Interacting selectively and non-covalently with calmodulin, a calcium-binding protein with many roles, both in the calcium-bound and calcium-free states.		F
EnsemblPlants Rel 51	TraesCS1B02G060800	TraesCS1B03G0146600		GO:0016787	hydrolase activity	Catalysis of the hydrolysis of various bonds, e.g. C-O, C-N, C-C, phosphoric anhydride bonds, etc. Hydrolase is the systematic name for any enzyme of EC class 3.		F
EnsemblPlants Rel 51	TraesCS1B02G061000	TraesCS1B03G0147600		GO:0003824	catalytic activity	Catalysis of a biochemical reaction at physiological temperatures. In biologically catalyzed reactions, the reactants are known as substrates, and the catalysts are naturally occurring macromolecular substances known as enzymes. Enzymes possess specific binding sites for substrates, and are usually composed wholly or largely of protein, but RNA that has catalytic activity (ribozyme) is often also…		F
EnsemblPlants Rel 51	TraesCS1B02G061300	TraesCS1B03G0149100		GO:0000160	phosphorelay signal transduction system	A conserved series of molecular signals found in prokaryotes and eukaryotes; involves autophosphorylation of a histidine kinase and the transfer of the phosphate group to an aspartate that then acts as a phospho-donor to response regulator proteins.		P
EnsemblPlants Rel 51	TraesCS1B02G061600	TraesCS1B03G0150200		GO:0005515	protein binding	Interacting selectively and non-covalently with any protein or protein complex (a complex of two or more proteins that may include other nonprotein molecules).		F
EnsemblPlants Rel 51	TraesCS1B02G061700	TraesCS1B03G0150400		GO:0005515	protein binding	Interacting selectively and non-covalently with any protein or protein complex (a complex of two or more proteins that may include other nonprotein molecules).		F
EnsemblPlants Rel 51	TraesCS1B02G062100	TraesCS1B03G0152000		GO:0008194	UDP-glycosyltransferase activity	Catalysis of the transfer of a glycosyl group from a UDP-sugar to a small hydrophobic molecule.		F
EnsemblPlants Rel 51	TraesCS1B02G062400	TraesCS1B03G0152600		GO:0016021	integral component of membrane	The component of a membrane consisting of the gene products and protein complexes having at least some part of their peptide sequence embedded in the hydrophobic region of the membrane.		C
EnsemblPlants Rel 51	TraesCS1B02G062800	TraesCS1B03G0153400		GO:0005515	protein binding	Interacting selectively and non-covalently with any protein or protein complex (a complex of two or more proteins that may include other nonprotein molecules).		F
EnsemblPlants Rel 51	TraesCS1B02G062900	TraesCS1B03G0153500		GO:0005515	protein binding	Interacting selectively and non-covalently with any protein or protein complex (a complex of two or more proteins that may include other nonprotein molecules).		F
EnsemblPlants Rel 51	TraesCS1B02G064200	TraesCS1B03G0156700		GO:0016021	integral component of membrane	The component of a membrane consisting of the gene products and protein complexes having at least some part of their peptide sequence embedded in the hydrophobic region of the membrane.		C
EnsemblPlants Rel 51	TraesCS1B02G064600	TraesCS1B03G0157500		GO:0005975	carbohydrate metabolic process	The chemical reactions and pathways involving carbohydrates, any of a group of organic compounds based of the general formula Cx(H2O)y. Includes the formation of carbohydrate derivatives by the addition of a carbohydrate residue to another molecule.		P
EnsemblPlants Rel 51	TraesCS1B02G065000	TraesCS1B03G0158500		GO:0005975	carbohydrate metabolic process	The chemical reactions and pathways involving carbohydrates, any of a group of organic compounds based of the general formula Cx(H2O)y. Includes the formation of carbohydrate derivatives by the addition of a carbohydrate residue to another molecule.		P
EnsemblPlants Rel 51	TraesCS1B02G066200	TraesCS1B03G0164700		GO:0016020	membrane	A lipid bilayer along with all the proteins and protein complexes embedded in it an attached to it.		C
EnsemblPlants Rel 51	TraesCS1B02G066700	TraesCS1B03G0166000		GO:0005515	protein binding	Interacting selectively and non-covalently with any protein or protein complex (a complex of two or more proteins that may include other nonprotein molecules).		F
EnsemblPlants Rel 51	TraesCS1B02G067000	TraesCS1B03G0167700		GO:0006952	defense response	Reactions, triggered in response to the presence of a foreign body or the occurrence of an injury, which result in restriction of damage to the organism attacked or prevention/recovery from the infection caused by the attack.		P
EnsemblPlants Rel 51	TraesCS1B02G067100	TraesCS1B03G0167800		GO:0006952	defense response	Reactions, triggered in response to the presence of a foreign body or the occurrence of an injury, which result in restriction of damage to the organism attacked or prevention/recovery from the infection caused by the attack.		P
EnsemblPlants Rel 51	TraesCS1B02G067300	TraesCS1B03G0169200	Defensin [Source:UniProtKB/TrEMBL;Acc:W5A8J5]	GO:0006952	defense response	Reactions, triggered in response to the presence of a foreign body or the occurrence of an injury, which result in restriction of damage to the organism attacked or prevention/recovery from the infection caused by the attack.		P
EnsemblPlants Rel 51	TraesCS1B02G067400	TraesCS1B03G0169400		GO:0005515	protein binding	Interacting selectively and non-covalently with any protein or protein complex (a complex of two or more proteins that may include other nonprotein molecules).		F
EnsemblPlants Rel 51	TraesCS1B02G067600	TraesCS1B03G0171100		GO:0003824	catalytic activity	Catalysis of a biochemical reaction at physiological temperatures. In biologically catalyzed reactions, the reactants are known as substrates, and the catalysts are naturally occurring macromolecular substances known as enzymes. Enzymes possess specific binding sites for substrates, and are usually composed wholly or largely of protein, but RNA that has catalytic activity (ribozyme) is often also…		F
EnsemblPlants Rel 51	TraesCS1B02G067800	TraesCS1B03G0171500		GO:0005515	protein binding	Interacting selectively and non-covalently with any protein or protein complex (a complex of two or more proteins that may include other nonprotein molecules).		F
EnsemblPlants Rel 51	TraesCS1B02G068100	TraesCS1B03G0172800		GO:0003779	actin binding	Interacting selectively and non-covalently with monomeric or multimeric forms of actin, including actin filaments.		F
EnsemblPlants Rel 51	TraesCS1B02G069200	TraesCS1B03G0176400		GO:0016788	hydrolase activity, acting on ester bonds	Catalysis of the hydrolysis of any ester bond.		F
EnsemblPlants Rel 51	TraesCS1B02G069600	TraesCS1B03G0177900		GO:0030145	manganese ion binding	Interacting selectively and non-covalently with manganese (Mn) ions.		F
EnsemblPlants Rel 51	TraesCS1B02G069900	TraesCS1B03G0178400		GO:0030145	manganese ion binding	Interacting selectively and non-covalently with manganese (Mn) ions.		F
EnsemblPlants Rel 51	TraesCS1B02G070100	TraesCS1B03G0178800		GO:0030145	manganese ion binding	Interacting selectively and non-covalently with manganese (Mn) ions.		F
EnsemblPlants Rel 51	TraesCS1B02G071000	TraesCS1B03G0181300		GO:0005515	protein binding	Interacting selectively and non-covalently with any protein or protein complex (a complex of two or more proteins that may include other nonprotein molecules).		F
EnsemblPlants Rel 51	TraesCS1B02G071400	TraesCS1B03G0182400		GO:0031011	Ino80 complex	A multisubunit protein complex that contains the Ino80p ATPase; exhibits chromatin remodeling activity and 3' to 5' DNA helicase activity.		C
EnsemblPlants Rel 51	TraesCS1B02G071600	TraesCS1B03G0182800		GO:0005515	protein binding	Interacting selectively and non-covalently with any protein or protein complex (a complex of two or more proteins that may include other nonprotein molecules).		F
EnsemblPlants Rel 51	TraesCS1B02G071612	TraesCS1B03G0183100		GO:0005515	protein binding	Interacting selectively and non-covalently with any protein or protein complex (a complex of two or more proteins that may include other nonprotein molecules).		F
EnsemblPlants Rel 51	TraesCS1B02G071617	TraesCS1B03G0183200		GO:0005515	protein binding	Interacting selectively and non-covalently with any protein or protein complex (a complex of two or more proteins that may include other nonprotein molecules).		F
EnsemblPlants Rel 51	TraesCS1B02G071642	TraesCS1B03G0183300		GO:0005515	protein binding	Interacting selectively and non-covalently with any protein or protein complex (a complex of two or more proteins that may include other nonprotein molecules).		F
EnsemblPlants Rel 51	TraesCS1B02G071700	TraesCS1B03G0183700	transcription factor IIIA [Source:Projected from Arabidopsis thaliana (AT1G72050) TAIR;Acc:AT1G72050]	GO:0003676	nucleic acid binding	Interacting selectively and non-covalently with any nucleic acid.		F
EnsemblPlants Rel 51	TraesCS1B02G072300	TraesCS1B03G0185100		GO:0005515	protein binding	Interacting selectively and non-covalently with any protein or protein complex (a complex of two or more proteins that may include other nonprotein molecules).		F
EnsemblPlants Rel 51	TraesCS1B02G072400	TraesCS1B03G0185200		GO:0005515	protein binding	Interacting selectively and non-covalently with any protein or protein complex (a complex of two or more proteins that may include other nonprotein molecules).		F
EnsemblPlants Rel 51	TraesCS1B02G072700	TraesCS1B03G0185900		GO:0005515	protein binding	Interacting selectively and non-covalently with any protein or protein complex (a complex of two or more proteins that may include other nonprotein molecules).		F
EnsemblPlants Rel 51	TraesCS1B02G072900	TraesCS1B03G0186400		GO:0005515	protein binding	Interacting selectively and non-covalently with any protein or protein complex (a complex of two or more proteins that may include other nonprotein molecules).		F
EnsemblPlants Rel 51	TraesCS1B02G073000	TraesCS1B03G0186500		GO:0005515	protein binding	Interacting selectively and non-covalently with any protein or protein complex (a complex of two or more proteins that may include other nonprotein molecules).		F
EnsemblPlants Rel 51	TraesCS1B02G073100	TraesCS1B03G0186600		GO:0005515	protein binding	Interacting selectively and non-covalently with any protein or protein complex (a complex of two or more proteins that may include other nonprotein molecules).		F
EnsemblPlants Rel 51	TraesCS1B02G073200	TraesCS1B03G0186700		GO:0005515	protein binding	Interacting selectively and non-covalently with any protein or protein complex (a complex of two or more proteins that may include other nonprotein molecules).		F
EnsemblPlants Rel 51	TraesCS1B02G073500	TraesCS1B03G0187300		GO:0016021	integral component of membrane	The component of a membrane consisting of the gene products and protein complexes having at least some part of their peptide sequence embedded in the hydrophobic region of the membrane.		C
EnsemblPlants Rel 51	TraesCS1B02G073600	TraesCS1B03G0187400		GO:0005515	protein binding	Interacting selectively and non-covalently with any protein or protein complex (a complex of two or more proteins that may include other nonprotein molecules).		F
EnsemblPlants Rel 51	TraesCS1B02G073800	TraesCS1B03G0187600		GO:0005515	protein binding	Interacting selectively and non-covalently with any protein or protein complex (a complex of two or more proteins that may include other nonprotein molecules).		F
EnsemblPlants Rel 51	TraesCS1B02G074500	TraesCS1B03G0188800		GO:0046872	metal ion binding	Interacting selectively and non-covalently with any metal ion.		F
EnsemblPlants Rel 51	TraesCS1B02G074600	TraesCS1B03G0189000		GO:0005515	protein binding	Interacting selectively and non-covalently with any protein or protein complex (a complex of two or more proteins that may include other nonprotein molecules).		F
EnsemblPlants Rel 51	TraesCS1B02G074700	TraesCS1B03G0189400		GO:0005515	protein binding	Interacting selectively and non-covalently with any protein or protein complex (a complex of two or more proteins that may include other nonprotein molecules).		F
EnsemblPlants Rel 51	TraesCS1B02G074805	TraesCS1B03G0189500		GO:0005515	protein binding	Interacting selectively and non-covalently with any protein or protein complex (a complex of two or more proteins that may include other nonprotein molecules).		F
EnsemblPlants Rel 51	TraesCS1B02G074905	TraesCS1B03G0189800		GO:0005515	protein binding	Interacting selectively and non-covalently with any protein or protein complex (a complex of two or more proteins that may include other nonprotein molecules).		F
EnsemblPlants Rel 51	TraesCS1B02G075000	TraesCS1B03G0190100		GO:0005515	protein binding	Interacting selectively and non-covalently with any protein or protein complex (a complex of two or more proteins that may include other nonprotein molecules).		F
EnsemblPlants Rel 51	TraesCS1B02G075300	TraesCS1B03G0190600		GO:0005515	protein binding	Interacting selectively and non-covalently with any protein or protein complex (a complex of two or more proteins that may include other nonprotein molecules).		F
EnsemblPlants Rel 51	TraesCS1B02G075500	TraesCS1B03G0190900		GO:0005515	protein binding	Interacting selectively and non-covalently with any protein or protein complex (a complex of two or more proteins that may include other nonprotein molecules).		F
EnsemblPlants Rel 51	TraesCS1B02G076000	TraesCS1B03G0193600		GO:0005515	protein binding	Interacting selectively and non-covalently with any protein or protein complex (a complex of two or more proteins that may include other nonprotein molecules).		F
EnsemblPlants Rel 51	TraesCS1B02G076500	TraesCS1B03G0192600		GO:0043531	ADP binding	Interacting selectively and non-covalently with ADP, adenosine 5'-diphosphate.		F
EnsemblPlants Rel 51	TraesCS1B02G077000	TraesCS1B03G0194000		GO:0016021	integral component of membrane	The component of a membrane consisting of the gene products and protein complexes having at least some part of their peptide sequence embedded in the hydrophobic region of the membrane.		C
EnsemblPlants Rel 51	TraesCS1B02G077100	TraesCS1B03G0194100		GO:0005515	protein binding	Interacting selectively and non-covalently with any protein or protein complex (a complex of two or more proteins that may include other nonprotein molecules).		F
EnsemblPlants Rel 51	TraesCS1B02G077200	TraesCS1B03G0194200		GO:0016021	integral component of membrane	The component of a membrane consisting of the gene products and protein complexes having at least some part of their peptide sequence embedded in the hydrophobic region of the membrane.		C
EnsemblPlants Rel 51	TraesCS1B02G078700	TraesCS1B03G0198200		GO:0003676	nucleic acid binding	Interacting selectively and non-covalently with any nucleic acid.		F
EnsemblPlants Rel 51	TraesCS1B02G078800	TraesCS1B03G0199000		GO:0005515	protein binding	Interacting selectively and non-covalently with any protein or protein complex (a complex of two or more proteins that may include other nonprotein molecules).		F
EnsemblPlants Rel 51	TraesCS1B02G080100	TraesCS1B03G0201300		GO:0008234	cysteine-type peptidase activity	Catalysis of the hydrolysis of peptide bonds in a polypeptide chain by a mechanism in which the sulfhydryl group of a cysteine residue at the active center acts as a nucleophile.		F
EnsemblPlants Rel 51	TraesCS1B02G080500	TraesCS1B03G0202700		GO:0016021	integral component of membrane	The component of a membrane consisting of the gene products and protein complexes having at least some part of their peptide sequence embedded in the hydrophobic region of the membrane.		C
EnsemblPlants Rel 51	TraesCS1B02G081400	TraesCS1B03G0204100		GO:0008270	zinc ion binding	Interacting selectively and non-covalently with zinc (Zn) ions.		F
EnsemblPlants Rel 51	TraesCS1B02G081500	TraesCS1B03G0204300	Ubiquitin-conjugating enzyme 37 [Source:Projected from Arabidopsis thaliana (AT3G24515) UniProtKB/TrEMBL;Acc:A0A1I9LLL0]	GO:0016740	transferase activity	Catalysis of the transfer of a group, e.g. a methyl group, glycosyl group, acyl group, phosphorus-containing, or other groups, from one compound (generally regarded as the donor) to another compound (generally regarded as the acceptor). Transferase is the systematic name for any enzyme of EC class 2.		F
EnsemblPlants Rel 51	TraesCS1B02G081600	TraesCS1B03G0204400		GO:0043531	ADP binding	Interacting selectively and non-covalently with ADP, adenosine 5'-diphosphate.		F
EnsemblPlants Rel 51	TraesCS1B02G081700	TraesCS1B03G0205300		GO:0043531	ADP binding	Interacting selectively and non-covalently with ADP, adenosine 5'-diphosphate.		F
EnsemblPlants Rel 51	TraesCS1B02G082100	TraesCS1B03G0206600		GO:0005515	protein binding	Interacting selectively and non-covalently with any protein or protein complex (a complex of two or more proteins that may include other nonprotein molecules).		F
EnsemblPlants Rel 51	TraesCS1B02G082400	TraesCS1B03G0207900		GO:0005515	protein binding	Interacting selectively and non-covalently with any protein or protein complex (a complex of two or more proteins that may include other nonprotein molecules).		F
EnsemblPlants Rel 51	TraesCS1B02G082800	TraesCS1B03G0210600		GO:0005515	protein binding	Interacting selectively and non-covalently with any protein or protein complex (a complex of two or more proteins that may include other nonprotein molecules).		F
EnsemblPlants Rel 51	TraesCS1B02G083400	TraesCS1B03G0212900		GO:0005515	protein binding	Interacting selectively and non-covalently with any protein or protein complex (a complex of two or more proteins that may include other nonprotein molecules).		F
EnsemblPlants Rel 51	TraesCS1B02G083900	TraesCS1B03G0213800	SUMO (small ubiquitin-related modifier) E3-ligase, Abiotic stress response, Stress adaptatio [Source: Projected from Oryza sativa (Os05g0125000)]	GO:0008270	zinc ion binding	Interacting selectively and non-covalently with zinc (Zn) ions.		F
EnsemblPlants Rel 51	TraesCS1B02G084200	TraesCS1B03G0214100		GO:0005634	nucleus	A membrane-bounded organelle of eukaryotic cells in which chromosomes are housed and replicated. In most cells, the nucleus contains all of the cell's chromosomes except the organellar chromosomes, and is the site of RNA synthesis and processing. In some species, or in specialized cell types, RNA metabolism or DNA replication may be absent.		C
EnsemblPlants Rel 51	TraesCS1B02G084300	TraesCS1B03G0214500		GO:0045735	nutrient reservoir activity	Functions in the storage of nutritious substrates.		F
EnsemblPlants Rel 51	TraesCS1B02G084563	TraesCS1B03G0215900		GO:0005515	protein binding	Interacting selectively and non-covalently with any protein or protein complex (a complex of two or more proteins that may include other nonprotein molecules).		F
EnsemblPlants Rel 51	TraesCS1B02G084584	TraesCS1B03G0216200		GO:0005515	protein binding	Interacting selectively and non-covalently with any protein or protein complex (a complex of two or more proteins that may include other nonprotein molecules).		F
EnsemblPlants Rel 51	TraesCS1B02G084800	TraesCS1B03G0216500		GO:0005515	protein binding	Interacting selectively and non-covalently with any protein or protein complex (a complex of two or more proteins that may include other nonprotein molecules).		F
EnsemblPlants Rel 51	TraesCS1B02G085300	TraesCS1B03G0217900		GO:0005515	protein binding	Interacting selectively and non-covalently with any protein or protein complex (a complex of two or more proteins that may include other nonprotein molecules).		F
EnsemblPlants Rel 51	TraesCS1B02G085400	TraesCS1B03G0218200		GO:0005515	protein binding	Interacting selectively and non-covalently with any protein or protein complex (a complex of two or more proteins that may include other nonprotein molecules).		F
EnsemblPlants Rel 51	TraesCS1B02G085600	TraesCS1B03G0218400		GO:0005515	protein binding	Interacting selectively and non-covalently with any protein or protein complex (a complex of two or more proteins that may include other nonprotein molecules).		F
EnsemblPlants Rel 51	TraesCS1B02G085900	TraesCS1B03G0218700		GO:0005515	protein binding	Interacting selectively and non-covalently with any protein or protein complex (a complex of two or more proteins that may include other nonprotein molecules).		F
EnsemblPlants Rel 51	TraesCS1B02G085955	TraesCS1B03G0219000		GO:0005515	protein binding	Interacting selectively and non-covalently with any protein or protein complex (a complex of two or more proteins that may include other nonprotein molecules).		F
EnsemblPlants Rel 51	TraesCS1B02G086000	TraesCS1B03G0219200		GO:0005515	protein binding	Interacting selectively and non-covalently with any protein or protein complex (a complex of two or more proteins that may include other nonprotein molecules).		F
EnsemblPlants Rel 51	TraesCS1B02G086100	TraesCS1B03G0219400		GO:0016021	integral component of membrane	The component of a membrane consisting of the gene products and protein complexes having at least some part of their peptide sequence embedded in the hydrophobic region of the membrane.		C
EnsemblPlants Rel 51	TraesCS1B02G087500	TraesCS1B03G0227800		GO:0006355	regulation of transcription, DNA-templated	Any process that modulates the frequency, rate or extent of cellular DNA-templated transcription.		P
EnsemblPlants Rel 51	TraesCS1B02G087700	TraesCS1B03G0229300		GO:0005525	GTP binding	Interacting selectively and non-covalently with GTP, guanosine triphosphate.		F
EnsemblPlants Rel 51	TraesCS1B02G088000	TraesCS1B03G0230600		GO:0006364	rRNA processing	Any process involved in the conversion of a primary ribosomal RNA (rRNA) transcript into one or more mature rRNA molecules.		P
EnsemblPlants Rel 51	TraesCS1B02G088200	TraesCS1B03G0231200		GO:0006355	regulation of transcription, DNA-templated	Any process that modulates the frequency, rate or extent of cellular DNA-templated transcription.		P
EnsemblPlants Rel 51	TraesCS1B02G088400	TraesCS1B03G0232000		GO:0016021	integral component of membrane	The component of a membrane consisting of the gene products and protein complexes having at least some part of their peptide sequence embedded in the hydrophobic region of the membrane.		C
EnsemblPlants Rel 51	TraesCS1B02G089300	TraesCS1B03G0237400		GO:0006355	regulation of transcription, DNA-templated	Any process that modulates the frequency, rate or extent of cellular DNA-templated transcription.		P
EnsemblPlants Rel 51	TraesCS1B02G089400	TraesCS1B03G0237700		GO:0005515	protein binding	Interacting selectively and non-covalently with any protein or protein complex (a complex of two or more proteins that may include other nonprotein molecules).		F
EnsemblPlants Rel 51	TraesCS1B02G089500	TraesCS1B03G0237800		GO:0005515	protein binding	Interacting selectively and non-covalently with any protein or protein complex (a complex of two or more proteins that may include other nonprotein molecules).		F
EnsemblPlants Rel 51	TraesCS1B02G090200	TraesCS1B03G0239400		GO:0030247	polysaccharide binding	Interacting selectively and non-covalently with any polysaccharide, a polymer of many (typically more than 10) monosaccharide residues linked glycosidically.		F
EnsemblPlants Rel 51	TraesCS1B02G091100	TraesCS1B03G0242500		GO:0005515	protein binding	Interacting selectively and non-covalently with any protein or protein complex (a complex of two or more proteins that may include other nonprotein molecules).		F
EnsemblPlants Rel 51	TraesCS1B02G091200	TraesCS1B03G0243500		GO:0005515	protein binding	Interacting selectively and non-covalently with any protein or protein complex (a complex of two or more proteins that may include other nonprotein molecules).		F
EnsemblPlants Rel 51	TraesCS1B02G091300	TraesCS1B03G0243600		GO:0005515	protein binding	Interacting selectively and non-covalently with any protein or protein complex (a complex of two or more proteins that may include other nonprotein molecules).		F
EnsemblPlants Rel 51	TraesCS1B02G091800	TraesCS1B03G0244600	TPR5 [Source:Projected from Arabidopsis thaliana (AT1G56440) UniProtKB/TrEMBL;Acc:A0A178WG02]	GO:0005515	protein binding	Interacting selectively and non-covalently with any protein or protein complex (a complex of two or more proteins that may include other nonprotein molecules).		F
EnsemblPlants Rel 51	TraesCS1B02G092000	TraesCS1B03G0245100		GO:0005515	protein binding	Interacting selectively and non-covalently with any protein or protein complex (a complex of two or more proteins that may include other nonprotein molecules).		F
EnsemblPlants Rel 51	TraesCS1B02G092100	TraesCS1B03G0245300		GO:0016021	integral component of membrane	The component of a membrane consisting of the gene products and protein complexes having at least some part of their peptide sequence embedded in the hydrophobic region of the membrane.		C
EnsemblPlants Rel 51	TraesCS1B02G092500	TraesCS1B03G0246200		GO:0005515	protein binding	Interacting selectively and non-covalently with any protein or protein complex (a complex of two or more proteins that may include other nonprotein molecules).		F
EnsemblPlants Rel 51	TraesCS1B02G092600	TraesCS1B03G0246500		GO:0005515	protein binding	Interacting selectively and non-covalently with any protein or protein complex (a complex of two or more proteins that may include other nonprotein molecules).		F
EnsemblPlants Rel 51	TraesCS1B02G092700	TraesCS1B03G0246600		GO:0009734	auxin-activated signaling pathway	A series of molecular signals generated by the binding of the plant hormone auxin to a receptor, and ending with modulation of a downstream cellular process, e.g. transcription.		P
EnsemblPlants Rel 51	TraesCS1B02G092800	TraesCS1B03G0246900		GO:0005515	protein binding	Interacting selectively and non-covalently with any protein or protein complex (a complex of two or more proteins that may include other nonprotein molecules).		F
EnsemblPlants Rel 51	TraesCS1B02G092900	TraesCS1B03G0247000		GO:0005515	protein binding	Interacting selectively and non-covalently with any protein or protein complex (a complex of two or more proteins that may include other nonprotein molecules).		F
EnsemblPlants Rel 51	TraesCS1B02G093000	TraesCS1B03G0247100		GO:0005515	protein binding	Interacting selectively and non-covalently with any protein or protein complex (a complex of two or more proteins that may include other nonprotein molecules).		F
EnsemblPlants Rel 51	TraesCS1B02G093100	TraesCS1B03G0247400		GO:0005515	protein binding	Interacting selectively and non-covalently with any protein or protein complex (a complex of two or more proteins that may include other nonprotein molecules).		F
EnsemblPlants Rel 51	TraesCS1B02G093200	TraesCS1B03G0248100		GO:0016021	integral component of membrane	The component of a membrane consisting of the gene products and protein complexes having at least some part of their peptide sequence embedded in the hydrophobic region of the membrane.		C
EnsemblPlants Rel 51	TraesCS1B02G093300	TraesCS1B03G0248200		GO:0003676	nucleic acid binding	Interacting selectively and non-covalently with any nucleic acid.		F
EnsemblPlants Rel 51	TraesCS1B02G093400	TraesCS1B03G0248700		GO:0016021	integral component of membrane	The component of a membrane consisting of the gene products and protein complexes having at least some part of their peptide sequence embedded in the hydrophobic region of the membrane.		C
EnsemblPlants Rel 51	TraesCS1B02G093500	TraesCS1B03G0248800		GO:0005515	protein binding	Interacting selectively and non-covalently with any protein or protein complex (a complex of two or more proteins that may include other nonprotein molecules).		F
EnsemblPlants Rel 51	TraesCS1B02G093600	TraesCS1B03G0248900		GO:0003824	catalytic activity	Catalysis of a biochemical reaction at physiological temperatures. In biologically catalyzed reactions, the reactants are known as substrates, and the catalysts are naturally occurring macromolecular substances known as enzymes. Enzymes possess specific binding sites for substrates, and are usually composed wholly or largely of protein, but RNA that has catalytic activity (ribozyme) is often also…		F
EnsemblPlants Rel 51	TraesCS1B02G094000	TraesCS1B03G0249700		GO:0005515	protein binding	Interacting selectively and non-covalently with any protein or protein complex (a complex of two or more proteins that may include other nonprotein molecules).		F
EnsemblPlants Rel 51	TraesCS1B02G094400	TraesCS1B03G0252300		GO:0016021	integral component of membrane	The component of a membrane consisting of the gene products and protein complexes having at least some part of their peptide sequence embedded in the hydrophobic region of the membrane.		C
EnsemblPlants Rel 51	TraesCS1B02G094500	TraesCS1B03G0252700		GO:0003677	DNA binding	Any molecular function by which a gene product interacts selectively and non-covalently with DNA (deoxyribonucleic acid).		F
EnsemblPlants Rel 51	TraesCS1B02G095100	TraesCS1B03G0255000		GO:0016788	hydrolase activity, acting on ester bonds	Catalysis of the hydrolysis of any ester bond.		F
EnsemblPlants Rel 51	TraesCS1B02G095300	TraesCS1B03G0256400		GO:0005515	protein binding	Interacting selectively and non-covalently with any protein or protein complex (a complex of two or more proteins that may include other nonprotein molecules).		F
EnsemblPlants Rel 51	TraesCS1B02G095900	TraesCS1B03G0257300		GO:0016021	integral component of membrane	The component of a membrane consisting of the gene products and protein complexes having at least some part of their peptide sequence embedded in the hydrophobic region of the membrane.		C
EnsemblPlants Rel 51	TraesCS1B02G096700	TraesCS1B03G0258800		GO:0016021	integral component of membrane	The component of a membrane consisting of the gene products and protein complexes having at least some part of their peptide sequence embedded in the hydrophobic region of the membrane.		C
EnsemblPlants Rel 51	TraesCS1B02G097000	TraesCS1B03G0260000		GO:0046983	protein dimerization activity	The formation of a protein dimer, a macromolecular structure consists of two noncovalently associated identical or nonidentical subunits.		F
EnsemblPlants Rel 51	TraesCS1B02G097500	TraesCS1B03G0262400		GO:0003677	DNA binding	Any molecular function by which a gene product interacts selectively and non-covalently with DNA (deoxyribonucleic acid).		F
EnsemblPlants Rel 51	TraesCS1B02G097800	TraesCS1B03G0262900		GO:0005635	nuclear envelope	The double lipid bilayer enclosing the nucleus and separating its contents from the rest of the cytoplasm; includes the intermembrane space, a gap of width 20-40 nm (also called the perinuclear space).		C
EnsemblPlants Rel 51	TraesCS1B02G098400	TraesCS1B03G0263800		GO:0005515	protein binding	Interacting selectively and non-covalently with any protein or protein complex (a complex of two or more proteins that may include other nonprotein molecules).		F
EnsemblPlants Rel 51	TraesCS1B02G098800	TraesCS1B03G0265200		GO:0016747	transferase activity, transferring acyl groups other than amino-acyl groups	Catalysis of the transfer of an acyl group, other than amino-acyl, from one compound (donor) to another (acceptor).		F
EnsemblPlants Rel 51	TraesCS1B02G098900	TraesCS1B03G0265600		GO:0005515	protein binding	Interacting selectively and non-covalently with any protein or protein complex (a complex of two or more proteins that may include other nonprotein molecules).		F
EnsemblPlants Rel 51	TraesCS1B02G099400	TraesCS1B03G0266900		GO:0016021	integral component of membrane	The component of a membrane consisting of the gene products and protein complexes having at least some part of their peptide sequence embedded in the hydrophobic region of the membrane.		C
EnsemblPlants Rel 51	TraesCS1B02G099500	TraesCS1B03G0267100		GO:0016021	integral component of membrane	The component of a membrane consisting of the gene products and protein complexes having at least some part of their peptide sequence embedded in the hydrophobic region of the membrane.		C
EnsemblPlants Rel 51	TraesCS1B02G100600	TraesCS1B03G0270700		GO:0003677	DNA binding	Any molecular function by which a gene product interacts selectively and non-covalently with DNA (deoxyribonucleic acid).		F
EnsemblPlants Rel 51	TraesCS1B02G101200	TraesCS1B03G0272000		GO:0005515	protein binding	Interacting selectively and non-covalently with any protein or protein complex (a complex of two or more proteins that may include other nonprotein molecules).		F
EnsemblPlants Rel 51	TraesCS1B02G101300	TraesCS1B03G0272200		GO:0016747	transferase activity, transferring acyl groups other than amino-acyl groups	Catalysis of the transfer of an acyl group, other than amino-acyl, from one compound (donor) to another (acceptor).		F
EnsemblPlants Rel 51	TraesCS1B02G101500	TraesCS1B03G0273300		GO:0016747	transferase activity, transferring acyl groups other than amino-acyl groups	Catalysis of the transfer of an acyl group, other than amino-acyl, from one compound (donor) to another (acceptor).		F
EnsemblPlants Rel 51	TraesCS1B02G101800	TraesCS1B03G0274000		GO:0003824	catalytic activity	Catalysis of a biochemical reaction at physiological temperatures. In biologically catalyzed reactions, the reactants are known as substrates, and the catalysts are naturally occurring macromolecular substances known as enzymes. Enzymes possess specific binding sites for substrates, and are usually composed wholly or largely of protein, but RNA that has catalytic activity (ribozyme) is often also…		F
EnsemblPlants Rel 51	TraesCS1B02G102800	TraesCS1B03G0276200		GO:0005515	protein binding	Interacting selectively and non-covalently with any protein or protein complex (a complex of two or more proteins that may include other nonprotein molecules).		F
EnsemblPlants Rel 51	TraesCS1B02G102900	TraesCS1B03G0276600		GO:0005515	protein binding	Interacting selectively and non-covalently with any protein or protein complex (a complex of two or more proteins that may include other nonprotein molecules).		F
EnsemblPlants Rel 51	TraesCS1B02G103100	TraesCS1B03G0276900		GO:0005515	protein binding	Interacting selectively and non-covalently with any protein or protein complex (a complex of two or more proteins that may include other nonprotein molecules).		F
EnsemblPlants Rel 51	TraesCS1B02G103300	TraesCS1B03G0277100		GO:0005515	protein binding	Interacting selectively and non-covalently with any protein or protein complex (a complex of two or more proteins that may include other nonprotein molecules).		F
EnsemblPlants Rel 51	TraesCS1B02G103500	TraesCS1B03G0277300		GO:0005515	protein binding	Interacting selectively and non-covalently with any protein or protein complex (a complex of two or more proteins that may include other nonprotein molecules).		F
EnsemblPlants Rel 51	TraesCS1B02G103600	TraesCS1B03G0277500		GO:0005515	protein binding	Interacting selectively and non-covalently with any protein or protein complex (a complex of two or more proteins that may include other nonprotein molecules).		F
EnsemblPlants Rel 51	TraesCS1B02G103800	TraesCS1B03G0278200		GO:0005515	protein binding	Interacting selectively and non-covalently with any protein or protein complex (a complex of two or more proteins that may include other nonprotein molecules).		F
EnsemblPlants Rel 51	TraesCS1B02G104800	TraesCS1B03G0281200		GO:0005515	protein binding	Interacting selectively and non-covalently with any protein or protein complex (a complex of two or more proteins that may include other nonprotein molecules).		F
EnsemblPlants Rel 51	TraesCS1B02G105200	TraesCS1B03G0283000		GO:0005515	protein binding	Interacting selectively and non-covalently with any protein or protein complex (a complex of two or more proteins that may include other nonprotein molecules).		F
EnsemblPlants Rel 51	TraesCS1B02G105700	TraesCS1B03G0284900		GO:0016021	integral component of membrane	The component of a membrane consisting of the gene products and protein complexes having at least some part of their peptide sequence embedded in the hydrophobic region of the membrane.		C
EnsemblPlants Rel 51	TraesCS1B02G106200	TraesCS1B03G0286200		GO:0046872	metal ion binding	Interacting selectively and non-covalently with any metal ion.		F
EnsemblPlants Rel 51	TraesCS1B02G106700	TraesCS1B03G0287400		GO:0046872	metal ion binding	Interacting selectively and non-covalently with any metal ion.		F
EnsemblPlants Rel 51	TraesCS1B02G106800	TraesCS1B03G0288100		GO:0003677	DNA binding	Any molecular function by which a gene product interacts selectively and non-covalently with DNA (deoxyribonucleic acid).		F
EnsemblPlants Rel 51	TraesCS1B02G107100	TraesCS1B03G0288600	Zinc finger, RING/FYVE/PHD-type domain containing protein [Source: Projected from Oryza sativa (Os07g0446100)]	GO:0005515	protein binding	Interacting selectively and non-covalently with any protein or protein complex (a complex of two or more proteins that may include other nonprotein molecules).		F
EnsemblPlants Rel 51	TraesCS1B02G107300	TraesCS1B03G0289400		GO:0016747	transferase activity, transferring acyl groups other than amino-acyl groups	Catalysis of the transfer of an acyl group, other than amino-acyl, from one compound (donor) to another (acceptor).		F
EnsemblPlants Rel 51	TraesCS1B02G107400	TraesCS1B03G0289600		GO:0016747	transferase activity, transferring acyl groups other than amino-acyl groups	Catalysis of the transfer of an acyl group, other than amino-acyl, from one compound (donor) to another (acceptor).		F
EnsemblPlants Rel 51	TraesCS1B02G107500	TraesCS1B03G0289800		GO:0016747	transferase activity, transferring acyl groups other than amino-acyl groups	Catalysis of the transfer of an acyl group, other than amino-acyl, from one compound (donor) to another (acceptor).		F
EnsemblPlants Rel 51	TraesCS1B02G108000	TraesCS1B03G0290700		GO:0005515	protein binding	Interacting selectively and non-covalently with any protein or protein complex (a complex of two or more proteins that may include other nonprotein molecules).		F
EnsemblPlants Rel 51	TraesCS1B02G108100	TraesCS1B03G0290900		GO:0003723	RNA binding	Interacting selectively and non-covalently with an RNA molecule or a portion thereof.		F
EnsemblPlants Rel 51	TraesCS1B02G108200	TraesCS1B03G0291000	VIN3-like protein 1 [Source:Projected from Arabidopsis thaliana (AT3G24440) UniProtKB/Swiss-Prot;Acc:Q9LHF5]	GO:0005515	protein binding	Interacting selectively and non-covalently with any protein or protein complex (a complex of two or more proteins that may include other nonprotein molecules).		F
EnsemblPlants Rel 51	TraesCS1B02G108300	TraesCS1B03G0291100		GO:0003677	DNA binding	Any molecular function by which a gene product interacts selectively and non-covalently with DNA (deoxyribonucleic acid).		F
EnsemblPlants Rel 51	TraesCS1B02G108400	TraesCS1B03G0291200		GO:0016788	hydrolase activity, acting on ester bonds	Catalysis of the hydrolysis of any ester bond.		F
EnsemblPlants Rel 51	TraesCS1B02G108500	TraesCS1B03G0291400		GO:0043531	ADP binding	Interacting selectively and non-covalently with ADP, adenosine 5'-diphosphate.		F
EnsemblPlants Rel 51	TraesCS1B02G108700	TraesCS1B03G0291900		GO:0016021	integral component of membrane	The component of a membrane consisting of the gene products and protein complexes having at least some part of their peptide sequence embedded in the hydrophobic region of the membrane.		C
EnsemblPlants Rel 51	TraesCS1B02G109100	TraesCS1B03G0292500		GO:0005509	calcium ion binding	Interacting selectively and non-covalently with calcium ions (Ca2+).		F
EnsemblPlants Rel 51	TraesCS1B02G109200	TraesCS1B03G0292600	Pentatricopeptide repeat-containing protein At2g34400 [Source:Projected from Arabidopsis thaliana (AT2G34400) UniProtKB/Swiss-Prot;Acc:O64705]	GO:0005515	protein binding	Interacting selectively and non-covalently with any protein or protein complex (a complex of two or more proteins that may include other nonprotein molecules).		F
EnsemblPlants Rel 51	TraesCS1B02G109900	TraesCS1B03G0295300		GO:0005515	protein binding	Interacting selectively and non-covalently with any protein or protein complex (a complex of two or more proteins that may include other nonprotein molecules).		F
EnsemblPlants Rel 51	TraesCS1B02G110000	TraesCS1B03G0295900		GO:0005515	protein binding	Interacting selectively and non-covalently with any protein or protein complex (a complex of two or more proteins that may include other nonprotein molecules).		F
EnsemblPlants Rel 51	TraesCS1B02G110500	TraesCS1B03G0298100		GO:0005515	protein binding	Interacting selectively and non-covalently with any protein or protein complex (a complex of two or more proteins that may include other nonprotein molecules).		F
EnsemblPlants Rel 51	TraesCS1B02G111400	TraesCS1B03G0302200		GO:0016787	hydrolase activity	Catalysis of the hydrolysis of various bonds, e.g. C-O, C-N, C-C, phosphoric anhydride bonds, etc. Hydrolase is the systematic name for any enzyme of EC class 3.		F
EnsemblPlants Rel 51	TraesCS1B02G111500	TraesCS1B03G0302300		GO:0005515	protein binding	Interacting selectively and non-covalently with any protein or protein complex (a complex of two or more proteins that may include other nonprotein molecules).		F
EnsemblPlants Rel 51	TraesCS1B02G111600	TraesCS1B03G0302500		GO:0005515	protein binding	Interacting selectively and non-covalently with any protein or protein complex (a complex of two or more proteins that may include other nonprotein molecules).		F
EnsemblPlants Rel 51	TraesCS1B02G111700	TraesCS1B03G0302700		GO:0005515	protein binding	Interacting selectively and non-covalently with any protein or protein complex (a complex of two or more proteins that may include other nonprotein molecules).		F
EnsemblPlants Rel 51	TraesCS1B02G111800	TraesCS1B03G0302800		GO:0005515	protein binding	Interacting selectively and non-covalently with any protein or protein complex (a complex of two or more proteins that may include other nonprotein molecules).		F
EnsemblPlants Rel 51	TraesCS1B02G111900	TraesCS1B03G0302900		GO:0005515	protein binding	Interacting selectively and non-covalently with any protein or protein complex (a complex of two or more proteins that may include other nonprotein molecules).		F
EnsemblPlants Rel 51	TraesCS1B02G112200	TraesCS1B03G0303800		GO:0043531	ADP binding	Interacting selectively and non-covalently with ADP, adenosine 5'-diphosphate.		F
EnsemblPlants Rel 51	TraesCS1B02G112600	TraesCS1B03G0304400		GO:0000911	cytokinesis by cell plate formation	The process of dividing the cytoplasm of a parent cell where a structure forms in the cytoplasm and grows until reaching the plasma membrane, thereby completely separating the cytoplasms of adjacent progeny cells. An example of this is found in Arabidopsis thaliana.		P
EnsemblPlants Rel 51	TraesCS1B02G112900	TraesCS1B03G0305500		GO:0046983	protein dimerization activity	The formation of a protein dimer, a macromolecular structure consists of two noncovalently associated identical or nonidentical subunits.		F
EnsemblPlants Rel 51	TraesCS1B02G113100	TraesCS1B03G0305700		GO:0046983	protein dimerization activity	The formation of a protein dimer, a macromolecular structure consists of two noncovalently associated identical or nonidentical subunits.		F
EnsemblPlants Rel 51	TraesCS1B02G113979	TraesCS1B03G0307400		GO:0005515	protein binding	Interacting selectively and non-covalently with any protein or protein complex (a complex of two or more proteins that may include other nonprotein molecules).		F
EnsemblPlants Rel 51	TraesCS1B02G114317	TraesCS1B03G0308800		GO:0005515	protein binding	Interacting selectively and non-covalently with any protein or protein complex (a complex of two or more proteins that may include other nonprotein molecules).		F
EnsemblPlants Rel 51	TraesCS1B02G114600	TraesCS1B03G0310300		GO:0004857	enzyme inhibitor activity	Binds to and stops, prevents or reduces the activity of an enzyme.		F
EnsemblPlants Rel 51	TraesCS1B02G114700	TraesCS1B03G0310600		GO:0005515	protein binding	Interacting selectively and non-covalently with any protein or protein complex (a complex of two or more proteins that may include other nonprotein molecules).		F
EnsemblPlants Rel 51	TraesCS1B02G114800	TraesCS1B03G0311400		GO:0005515	protein binding	Interacting selectively and non-covalently with any protein or protein complex (a complex of two or more proteins that may include other nonprotein molecules).		F
EnsemblPlants Rel 51	TraesCS1B02G115100	TraesCS1B03G0314500		GO:0016021	integral component of membrane	The component of a membrane consisting of the gene products and protein complexes having at least some part of their peptide sequence embedded in the hydrophobic region of the membrane.		C
EnsemblPlants Rel 51	TraesCS1B02G115500	TraesCS1B03G0316200		GO:0005515	protein binding	Interacting selectively and non-covalently with any protein or protein complex (a complex of two or more proteins that may include other nonprotein molecules).		F
EnsemblPlants Rel 51	TraesCS1B02G116000	TraesCS1B03G0317500		GO:0016021	integral component of membrane	The component of a membrane consisting of the gene products and protein complexes having at least some part of their peptide sequence embedded in the hydrophobic region of the membrane.		C
EnsemblPlants Rel 51	TraesCS1B02G117300	TraesCS1B03G0320100		GO:0003676	nucleic acid binding	Interacting selectively and non-covalently with any nucleic acid.		F
EnsemblPlants Rel 51	TraesCS1B02G117700	TraesCS1B03G0321000		GO:0003676	nucleic acid binding	Interacting selectively and non-covalently with any nucleic acid.		F
EnsemblPlants Rel 51	TraesCS1B02G117800	TraesCS1B03G0321100		GO:0016021	integral component of membrane	The component of a membrane consisting of the gene products and protein complexes having at least some part of their peptide sequence embedded in the hydrophobic region of the membrane.		C
EnsemblPlants Rel 51	TraesCS1B02G118300	TraesCS1B03G0322100	AtAPC7 [Source:Projected from Arabidopsis thaliana (AT2G39090) UniProtKB/TrEMBL;Acc:A0A178VSZ9]	GO:0005515	protein binding	Interacting selectively and non-covalently with any protein or protein complex (a complex of two or more proteins that may include other nonprotein molecules).		F
EnsemblPlants Rel 51	TraesCS1B02G118400	TraesCS1B03G0322700	Pyridoxal phosphate homeostasis protein [Source:UniProtKB/TrEMBL;Acc:A0A1D5SM55]	GO:0030170	pyridoxal phosphate binding	Interacting selectively and non-covalently with pyridoxal 5' phosphate, 3-hydroxy-5-(hydroxymethyl)-2-methyl4-pyridine carboxaldehyde 5' phosphate, the biologically active form of vitamin B6.		F
EnsemblPlants Rel 51	TraesCS1B02G118600	TraesCS1B03G0323400		GO:0016021	integral component of membrane	The component of a membrane consisting of the gene products and protein complexes having at least some part of their peptide sequence embedded in the hydrophobic region of the membrane.		C
EnsemblPlants Rel 51	TraesCS1B02G119000	TraesCS1B03G0324000		GO:0003723	RNA binding	Interacting selectively and non-covalently with an RNA molecule or a portion thereof.		F
EnsemblPlants Rel 51	TraesCS1B02G119100	TraesCS1B03G0324200		GO:0005515	protein binding	Interacting selectively and non-covalently with any protein or protein complex (a complex of two or more proteins that may include other nonprotein molecules).		F
EnsemblPlants Rel 51	TraesCS1B02G120200	TraesCS1B03G0326300		GO:0005615	extracellular space	That part of a multicellular organism outside the cells proper, usually taken to be outside the plasma membranes, and occupied by fluid.		C
EnsemblPlants Rel 51	TraesCS1B02G120900	TraesCS1B03G0328000		GO:0005515	protein binding	Interacting selectively and non-covalently with any protein or protein complex (a complex of two or more proteins that may include other nonprotein molecules).		F
EnsemblPlants Rel 51	TraesCS1B02G121000	TraesCS1B03G0328300		GO:0005515	protein binding	Interacting selectively and non-covalently with any protein or protein complex (a complex of two or more proteins that may include other nonprotein molecules).		F
EnsemblPlants Rel 51	TraesCS1B02G121300	TraesCS1B03G0329500		GO:0005515	protein binding	Interacting selectively and non-covalently with any protein or protein complex (a complex of two or more proteins that may include other nonprotein molecules).		F
EnsemblPlants Rel 51	TraesCS1B02G121700	TraesCS1B03G0331500		GO:0005515	protein binding	Interacting selectively and non-covalently with any protein or protein complex (a complex of two or more proteins that may include other nonprotein molecules).		F
EnsemblPlants Rel 51	TraesCS1B02G121800	TraesCS1B03G0331700		GO:0005515	protein binding	Interacting selectively and non-covalently with any protein or protein complex (a complex of two or more proteins that may include other nonprotein molecules).		F
EnsemblPlants Rel 51	TraesCS1B02G122200	TraesCS1B03G0332700		GO:0005515	protein binding	Interacting selectively and non-covalently with any protein or protein complex (a complex of two or more proteins that may include other nonprotein molecules).		F
EnsemblPlants Rel 51	TraesCS1B02G122500	TraesCS1B03G0333900		GO:0003677	DNA binding	Any molecular function by which a gene product interacts selectively and non-covalently with DNA (deoxyribonucleic acid).		F
EnsemblPlants Rel 51	TraesCS1B02G122600	TraesCS1B03G0334000		GO:0031047	gene silencing by RNA	Any process in which RNA molecules inactivate expression of target genes.		P
EnsemblPlants Rel 51	TraesCS1B02G122700	TraesCS1B03G0334800		GO:0005515	protein binding	Interacting selectively and non-covalently with any protein or protein complex (a complex of two or more proteins that may include other nonprotein molecules).		F
EnsemblPlants Rel 51	TraesCS1B02G123400	TraesCS1B03G0336700		GO:0004842	ubiquitin-protein transferase activity	Catalysis of the transfer of ubiquitin from one protein to another via the reaction X-Ub + Y --> Y-Ub + X, where both X-Ub and Y-Ub are covalent linkages.		F
EnsemblPlants Rel 51	TraesCS1B02G123800	TraesCS1B03G0337300		GO:0046983	protein dimerization activity	The formation of a protein dimer, a macromolecular structure consists of two noncovalently associated identical or nonidentical subunits.		F
EnsemblPlants Rel 51	TraesCS1B02G125200	TraesCS1B03G0341300		GO:0008234	cysteine-type peptidase activity	Catalysis of the hydrolysis of peptide bonds in a polypeptide chain by a mechanism in which the sulfhydryl group of a cysteine residue at the active center acts as a nucleophile.		F
EnsemblPlants Rel 51	TraesCS1B02G125400	TraesCS1B03G0341500		GO:0016021	integral component of membrane	The component of a membrane consisting of the gene products and protein complexes having at least some part of their peptide sequence embedded in the hydrophobic region of the membrane.		C
EnsemblPlants Rel 51	TraesCS1B02G125500	TraesCS1B03G0341800		GO:0005634	nucleus	A membrane-bounded organelle of eukaryotic cells in which chromosomes are housed and replicated. In most cells, the nucleus contains all of the cell's chromosomes except the organellar chromosomes, and is the site of RNA synthesis and processing. In some species, or in specialized cell types, RNA metabolism or DNA replication may be absent.		C
EnsemblPlants Rel 51	TraesCS1B02G125900	TraesCS1B03G0343100		GO:0003677	DNA binding	Any molecular function by which a gene product interacts selectively and non-covalently with DNA (deoxyribonucleic acid).		F
EnsemblPlants Rel 51	TraesCS1B02G125949	TraesCS1B03G0343200		GO:0005515	protein binding	Interacting selectively and non-covalently with any protein or protein complex (a complex of two or more proteins that may include other nonprotein molecules).		F
EnsemblPlants Rel 51	TraesCS1B02G126300	TraesCS1B03G0344000		GO:0016021	integral component of membrane	The component of a membrane consisting of the gene products and protein complexes having at least some part of their peptide sequence embedded in the hydrophobic region of the membrane.		C
EnsemblPlants Rel 51	TraesCS1B02G126400	TraesCS1B03G0344100		GO:0008270	zinc ion binding	Interacting selectively and non-covalently with zinc (Zn) ions.		F
EnsemblPlants Rel 51	TraesCS1B02G126900	TraesCS1B03G0344600		GO:0009767	photosynthetic electron transport chain	A process, occurring as part of photosynthesis, in which light provides the energy for a series of electron carriers to operate together to transfer electrons and generate a transmembrane electrochemical gradient.		P
EnsemblPlants Rel 51	TraesCS1B02G127100	TraesCS1B03G0345100		GO:0003677	DNA binding	Any molecular function by which a gene product interacts selectively and non-covalently with DNA (deoxyribonucleic acid).		F
EnsemblPlants Rel 51	TraesCS1B02G127300	TraesCS1B03G0345300		GO:0046872	metal ion binding	Interacting selectively and non-covalently with any metal ion.		F
EnsemblPlants Rel 51	TraesCS1B02G128100	TraesCS1B03G0346300	Serine/threonine-protein phosphatase [Source:UniProtKB/TrEMBL;Acc:A0A341P1S3]	GO:0016787	hydrolase activity	Catalysis of the hydrolysis of various bonds, e.g. C-O, C-N, C-C, phosphoric anhydride bonds, etc. Hydrolase is the systematic name for any enzyme of EC class 3.		F
EnsemblPlants Rel 51	TraesCS1B02G128600	TraesCS1B03G0347800		GO:0016788	hydrolase activity, acting on ester bonds	Catalysis of the hydrolysis of any ester bond.		F
EnsemblPlants Rel 51	TraesCS1B02G128700	TraesCS1B03G0348100		GO:0003723	RNA binding	Interacting selectively and non-covalently with an RNA molecule or a portion thereof.		F
EnsemblPlants Rel 51	TraesCS1B02G128900	TraesCS1B03G0348400		GO:0016021	integral component of membrane	The component of a membrane consisting of the gene products and protein complexes having at least some part of their peptide sequence embedded in the hydrophobic region of the membrane.		C
EnsemblPlants Rel 51	TraesCS1B02G129200	TraesCS1B03G0349400		GO:0046983	protein dimerization activity	The formation of a protein dimer, a macromolecular structure consists of two noncovalently associated identical or nonidentical subunits.		F
EnsemblPlants Rel 51	TraesCS1B02G130600	TraesCS1B03G0354900		GO:0005515	protein binding	Interacting selectively and non-covalently with any protein or protein complex (a complex of two or more proteins that may include other nonprotein molecules).		F
EnsemblPlants Rel 51	TraesCS1B02G131100	TraesCS1B03G0356600		GO:0003676	nucleic acid binding	Interacting selectively and non-covalently with any nucleic acid.		F
EnsemblPlants Rel 51	TraesCS1B02G131200	TraesCS1B03G0356700		GO:0003676	nucleic acid binding	Interacting selectively and non-covalently with any nucleic acid.		F
EnsemblPlants Rel 51	TraesCS1B02G131400	TraesCS1B03G0357500		GO:0046912	transferase activity, transferring acyl groups, acyl groups converted into alkyl on transfer	Catalysis of the transfer of an acyl group from one compound (donor) to another (acceptor), with the acyl group being converted into alkyl on transfer.		F
EnsemblPlants Rel 51	TraesCS1B02G131600	TraesCS1B03G0358500		GO:0005515	protein binding	Interacting selectively and non-covalently with any protein or protein complex (a complex of two or more proteins that may include other nonprotein molecules).		F
EnsemblPlants Rel 51	TraesCS1B02G132200	TraesCS1B03G0359700		GO:0005515	protein binding	Interacting selectively and non-covalently with any protein or protein complex (a complex of two or more proteins that may include other nonprotein molecules).		F
EnsemblPlants Rel 51	TraesCS1B02G132500	TraesCS1B03G0360100		GO:0003779	actin binding	Interacting selectively and non-covalently with monomeric or multimeric forms of actin, including actin filaments.		F
EnsemblPlants Rel 51	TraesCS1B02G132800	TraesCS1B03G0360800		GO:0016021	integral component of membrane	The component of a membrane consisting of the gene products and protein complexes having at least some part of their peptide sequence embedded in the hydrophobic region of the membrane.		C
EnsemblPlants Rel 51	TraesCS1B02G133200	TraesCS1B03G0361800		GO:0016021	integral component of membrane	The component of a membrane consisting of the gene products and protein complexes having at least some part of their peptide sequence embedded in the hydrophobic region of the membrane.		C
EnsemblPlants Rel 51	TraesCS1B02G133800	TraesCS1B03G0363200		GO:0005515	protein binding	Interacting selectively and non-covalently with any protein or protein complex (a complex of two or more proteins that may include other nonprotein molecules).		F
EnsemblPlants Rel 51	TraesCS1B02G134900	TraesCS1B03G0366100		GO:0005515	protein binding	Interacting selectively and non-covalently with any protein or protein complex (a complex of two or more proteins that may include other nonprotein molecules).		F
EnsemblPlants Rel 51	TraesCS1B02G135300	TraesCS1B03G0367500		GO:0005515	protein binding	Interacting selectively and non-covalently with any protein or protein complex (a complex of two or more proteins that may include other nonprotein molecules).		F
EnsemblPlants Rel 51	TraesCS1B02G135500	TraesCS1B03G0367700		GO:0003676	nucleic acid binding	Interacting selectively and non-covalently with any nucleic acid.		F
EnsemblPlants Rel 51	TraesCS1B02G135800	TraesCS1B03G0368500		GO:0046872	metal ion binding	Interacting selectively and non-covalently with any metal ion.		F
EnsemblPlants Rel 51	TraesCS1B02G135900	TraesCS1B03G0368900		GO:0005525	GTP binding	Interacting selectively and non-covalently with GTP, guanosine triphosphate.		F
EnsemblPlants Rel 51	TraesCS1B02G136300	TraesCS1B03G0369600		GO:0046872	metal ion binding	Interacting selectively and non-covalently with any metal ion.		F
EnsemblPlants Rel 51	TraesCS1B02G136600	TraesCS1B03G0370100		GO:0016021	integral component of membrane	The component of a membrane consisting of the gene products and protein complexes having at least some part of their peptide sequence embedded in the hydrophobic region of the membrane.		C
EnsemblPlants Rel 51	TraesCS1B02G137400	TraesCS1B03G0371300		GO:0005515	protein binding	Interacting selectively and non-covalently with any protein or protein complex (a complex of two or more proteins that may include other nonprotein molecules).		F
EnsemblPlants Rel 51	TraesCS1B02G137600	TraesCS1B03G0371600	Glycosyltransferase [Source:UniProtKB/TrEMBL;Acc:A0A341NYX9]	GO:0008194	UDP-glycosyltransferase activity	Catalysis of the transfer of a glycosyl group from a UDP-sugar to a small hydrophobic molecule.		F
EnsemblPlants Rel 51	TraesCS1B02G138600	TraesCS1B03G0376500		GO:0016747	transferase activity, transferring acyl groups other than amino-acyl groups	Catalysis of the transfer of an acyl group, other than amino-acyl, from one compound (donor) to another (acceptor).		F
EnsemblPlants Rel 51	TraesCS1B02G139000	TraesCS1B03G0378100		GO:0005515	protein binding	Interacting selectively and non-covalently with any protein or protein complex (a complex of two or more proteins that may include other nonprotein molecules).		F
EnsemblPlants Rel 51	TraesCS1B02G139500	TraesCS1B03G0380000		GO:0005524	ATP binding	Interacting selectively and non-covalently with ATP, adenosine 5'-triphosphate, a universally important coenzyme and enzyme regulator.		F
EnsemblPlants Rel 51	TraesCS1B02G139800	TraesCS1B03G0380800		GO:0016021	integral component of membrane	The component of a membrane consisting of the gene products and protein complexes having at least some part of their peptide sequence embedded in the hydrophobic region of the membrane.		C
EnsemblPlants Rel 51	TraesCS1B02G140500	TraesCS1B03G0383600		GO:0005515	protein binding	Interacting selectively and non-covalently with any protein or protein complex (a complex of two or more proteins that may include other nonprotein molecules).		F
EnsemblPlants Rel 51	TraesCS1B02G140511	TraesCS1B03G0383700		GO:0005515	protein binding	Interacting selectively and non-covalently with any protein or protein complex (a complex of two or more proteins that may include other nonprotein molecules).		F
EnsemblPlants Rel 51	TraesCS1B02G140700	TraesCS1B03G0384100		GO:0016021	integral component of membrane	The component of a membrane consisting of the gene products and protein complexes having at least some part of their peptide sequence embedded in the hydrophobic region of the membrane.		C
EnsemblPlants Rel 51	TraesCS1B02G141300	TraesCS1B03G0385700		GO:0016021	integral component of membrane	The component of a membrane consisting of the gene products and protein complexes having at least some part of their peptide sequence embedded in the hydrophobic region of the membrane.		C
EnsemblPlants Rel 51	TraesCS1B02G141400	TraesCS1B03G0386200	Actin binding protein family [Source:Projected from Arabidopsis thaliana (AT1G52080) UniProtKB/TrEMBL;Acc:Q9SAU9]	GO:0016021	integral component of membrane	The component of a membrane consisting of the gene products and protein complexes having at least some part of their peptide sequence embedded in the hydrophobic region of the membrane.		C
EnsemblPlants Rel 51	TraesCS1B02G142100	TraesCS1B03G0389100		GO:0005515	protein binding	Interacting selectively and non-covalently with any protein or protein complex (a complex of two or more proteins that may include other nonprotein molecules).		F
EnsemblPlants Rel 51	TraesCS1B02G143000	TraesCS1B03G0391300	PRA1 family protein [Source:UniProtKB/TrEMBL;Acc:W5A9A7]	GO:0016021	integral component of membrane	The component of a membrane consisting of the gene products and protein complexes having at least some part of their peptide sequence embedded in the hydrophobic region of the membrane.		C
EnsemblPlants Rel 51	TraesCS1B02G143500	TraesCS1B03G0393200		GO:0005515	protein binding	Interacting selectively and non-covalently with any protein or protein complex (a complex of two or more proteins that may include other nonprotein molecules).		F
EnsemblPlants Rel 51	TraesCS1B02G144100	TraesCS1B03G0394500		GO:0003677	DNA binding	Any molecular function by which a gene product interacts selectively and non-covalently with DNA (deoxyribonucleic acid).		F
EnsemblPlants Rel 51	TraesCS1B02G145300	TraesCS1B03G0397800		GO:0016788	hydrolase activity, acting on ester bonds	Catalysis of the hydrolysis of any ester bond.		F
EnsemblPlants Rel 51	TraesCS1B02G146000	TraesCS1B03G0400200		GO:0016021	integral component of membrane	The component of a membrane consisting of the gene products and protein complexes having at least some part of their peptide sequence embedded in the hydrophobic region of the membrane.		C
EnsemblPlants Rel 51	TraesCS1B02G146500	TraesCS1B03G0402600		GO:0046983	protein dimerization activity	The formation of a protein dimer, a macromolecular structure consists of two noncovalently associated identical or nonidentical subunits.		F
EnsemblPlants Rel 51	TraesCS1B02G146900	TraesCS1B03G0404400		GO:0005634	nucleus	A membrane-bounded organelle of eukaryotic cells in which chromosomes are housed and replicated. In most cells, the nucleus contains all of the cell's chromosomes except the organellar chromosomes, and is the site of RNA synthesis and processing. In some species, or in specialized cell types, RNA metabolism or DNA replication may be absent.		C
EnsemblPlants Rel 51	TraesCS1B02G147900	TraesCS1B03G0410200		GO:0004857	enzyme inhibitor activity	Binds to and stops, prevents or reduces the activity of an enzyme.		F
EnsemblPlants Rel 51	TraesCS1B02G148000	TraesCS1B03G0410800		GO:0005509	calcium ion binding	Interacting selectively and non-covalently with calcium ions (Ca2+).		F
EnsemblPlants Rel 51	TraesCS1B02G148200	TraesCS1B03G0411500		GO:0005509	calcium ion binding	Interacting selectively and non-covalently with calcium ions (Ca2+).		F
EnsemblPlants Rel 51	TraesCS1B02G148700	TraesCS1B03G0414000		GO:0005515	protein binding	Interacting selectively and non-covalently with any protein or protein complex (a complex of two or more proteins that may include other nonprotein molecules).		F
EnsemblPlants Rel 51	TraesCS1B02G148900	TraesCS1B03G0415700		GO:0016021	integral component of membrane	The component of a membrane consisting of the gene products and protein complexes having at least some part of their peptide sequence embedded in the hydrophobic region of the membrane.		C
EnsemblPlants Rel 51	TraesCS1B02G149000	TraesCS1B03G0416700		GO:0000123	histone acetyltransferase complex	A protein complex that possesses histone acetyltransferase activity.		C
EnsemblPlants Rel 51	TraesCS1B02G149600	TraesCS1B03G0419300		GO:0016746	transferase activity, transferring acyl groups	Catalysis of the transfer of an acyl group from one compound (donor) to another (acceptor).		F
EnsemblPlants Rel 51	TraesCS1B02G150100	TraesCS1B03G0424200	Pentatricopeptide repeat-containing protein MRL1, chloroplastic [Source:Projected from Arabidopsis thaliana (AT4G34830) UniProtKB/Swiss-Prot;Acc:Q0WLC6]	GO:0005515	protein binding	Interacting selectively and non-covalently with any protein or protein complex (a complex of two or more proteins that may include other nonprotein molecules).		F
EnsemblPlants Rel 51	TraesCS1B02G150500	TraesCS1B03G0426100		GO:0004386	helicase activity	Catalysis of the reaction: ATP + H2O = ADP + phosphate, to drive the unwinding of a DNA or RNA helix.		F
EnsemblPlants Rel 51	TraesCS1B02G150600	TraesCS1B03G0426400		GO:0046872	metal ion binding	Interacting selectively and non-covalently with any metal ion.		F
EnsemblPlants Rel 51	TraesCS1B02G150800	TraesCS1B03G0427300		GO:0016021	integral component of membrane	The component of a membrane consisting of the gene products and protein complexes having at least some part of their peptide sequence embedded in the hydrophobic region of the membrane.		C
EnsemblPlants Rel 51	TraesCS1B02G152000	TraesCS1B03G0433500		GO:0016021	integral component of membrane	The component of a membrane consisting of the gene products and protein complexes having at least some part of their peptide sequence embedded in the hydrophobic region of the membrane.		C
EnsemblPlants Rel 51	TraesCS1B02G152200	TraesCS1B03G0432400		GO:0003779	actin binding	Interacting selectively and non-covalently with monomeric or multimeric forms of actin, including actin filaments.		F
EnsemblPlants Rel 51	TraesCS1B02G152300	TraesCS1B03G0432500		GO:0044237	cellular metabolic process	The chemical reactions and pathways by which individual cells transform chemical substances.		P
EnsemblPlants Rel 51	TraesCS1B02G153000	TraesCS1B03G0437500		GO:0016021	integral component of membrane	The component of a membrane consisting of the gene products and protein complexes having at least some part of their peptide sequence embedded in the hydrophobic region of the membrane.		C
EnsemblPlants Rel 51	TraesCS1B02G153700	TraesCS1B03G0439900		GO:0008168	methyltransferase activity	Catalysis of the transfer of a methyl group to an acceptor molecule.		F
EnsemblPlants Rel 51	TraesCS1B02G153800	TraesCS1B03G0440300		GO:0003677	DNA binding	Any molecular function by which a gene product interacts selectively and non-covalently with DNA (deoxyribonucleic acid).		F
EnsemblPlants Rel 51	TraesCS1B02G154100	TraesCS1B03G0442700	SLOMO [Source:Projected from Arabidopsis thaliana (AT4G33210) UniProtKB/TrEMBL;Acc:A0A178V148]	GO:0005515	protein binding	Interacting selectively and non-covalently with any protein or protein complex (a complex of two or more proteins that may include other nonprotein molecules).		F
EnsemblPlants Rel 51	TraesCS1B02G154600	TraesCS1B03G0445900		GO:0005515	protein binding	Interacting selectively and non-covalently with any protein or protein complex (a complex of two or more proteins that may include other nonprotein molecules).		F
EnsemblPlants Rel 51	TraesCS1B02G154700	TraesCS1B03G0446700		GO:0003676	nucleic acid binding	Interacting selectively and non-covalently with any nucleic acid.		F
EnsemblPlants Rel 51	TraesCS1B02G155200	TraesCS1B03G0448800		GO:0050832	defense response to fungus	Reactions triggered in response to the presence of a fungus that act to protect the cell or organism.		P
EnsemblPlants Rel 51	TraesCS1B02G155800	TraesCS1B03G0450900		GO:0016021	integral component of membrane	The component of a membrane consisting of the gene products and protein complexes having at least some part of their peptide sequence embedded in the hydrophobic region of the membrane.		C
EnsemblPlants Rel 51	TraesCS1B02G155900	TraesCS1B03G0451000		GO:0016021	integral component of membrane	The component of a membrane consisting of the gene products and protein complexes having at least some part of their peptide sequence embedded in the hydrophobic region of the membrane.		C
EnsemblPlants Rel 51	TraesCS1B02G156000	TraesCS1B03G0451400		GO:0006511	ubiquitin-dependent protein catabolic process	The chemical reactions and pathways resulting in the breakdown of a protein or peptide by hydrolysis of its peptide bonds, initiated by the covalent attachment of a ubiquitin group, or multiple ubiquitin groups, to the protein.		P
EnsemblPlants Rel 51	TraesCS1B02G156200	TraesCS1B03G0451700		GO:0005515	protein binding	Interacting selectively and non-covalently with any protein or protein complex (a complex of two or more proteins that may include other nonprotein molecules).		F
EnsemblPlants Rel 51	TraesCS1B02G156300	TraesCS1B03G0451800		GO:0016788	hydrolase activity, acting on ester bonds	Catalysis of the hydrolysis of any ester bond.		F
EnsemblPlants Rel 51	TraesCS1B02G157500	TraesCS1B03G0455100		GO:0016021	integral component of membrane	The component of a membrane consisting of the gene products and protein complexes having at least some part of their peptide sequence embedded in the hydrophobic region of the membrane.		C
EnsemblPlants Rel 51	TraesCS1B02G157600	TraesCS1B03G0455200	Pentatricopeptide repeat-containing protein At5g08305 [Source:Projected from Arabidopsis thaliana (AT5G08305) UniProtKB/Swiss-Prot;Acc:P0C8Q7]	GO:0005515	protein binding	Interacting selectively and non-covalently with any protein or protein complex (a complex of two or more proteins that may include other nonprotein molecules).		F
EnsemblPlants Rel 51	TraesCS1B02G158200	TraesCS1B03G0456300		GO:0003677	DNA binding	Any molecular function by which a gene product interacts selectively and non-covalently with DNA (deoxyribonucleic acid).		F
EnsemblPlants Rel 51	TraesCS1B02G159200	TraesCS1B03G0461100		GO:0005515	protein binding	Interacting selectively and non-covalently with any protein or protein complex (a complex of two or more proteins that may include other nonprotein molecules).		F
EnsemblPlants Rel 51	TraesCS1B02G159600	TraesCS1B03G0462200		GO:0016021	integral component of membrane	The component of a membrane consisting of the gene products and protein complexes having at least some part of their peptide sequence embedded in the hydrophobic region of the membrane.		C
EnsemblPlants Rel 51	TraesCS1B02G159800	TraesCS1B03G0462400		GO:0046872	metal ion binding	Interacting selectively and non-covalently with any metal ion.		F
EnsemblPlants Rel 51	TraesCS1B02G161400	TraesCS1B03G0468900	CHR20 [Source:Projected from Arabidopsis thaliana (AT1G08600) UniProtKB/TrEMBL;Acc:A0A178VZQ9]	GO:0005524	ATP binding	Interacting selectively and non-covalently with ATP, adenosine 5'-triphosphate, a universally important coenzyme and enzyme regulator.		F
EnsemblPlants Rel 51	TraesCS1B02G161500	TraesCS1B03G0469000		GO:0016788	hydrolase activity, acting on ester bonds	Catalysis of the hydrolysis of any ester bond.		F
EnsemblPlants Rel 51	TraesCS1B02G162000	TraesCS1B03G0472200		GO:0005515	protein binding	Interacting selectively and non-covalently with any protein or protein complex (a complex of two or more proteins that may include other nonprotein molecules).		F
EnsemblPlants Rel 51	TraesCS1B02G162100	TraesCS1B03G0472300	Plastid transcriptionally active 3 [Source:Projected from Arabidopsis thaliana (AT3G04260) UniProtKB/TrEMBL;Acc:F4J3M2]	GO:0005515	protein binding	Interacting selectively and non-covalently with any protein or protein complex (a complex of two or more proteins that may include other nonprotein molecules).		F
EnsemblPlants Rel 51	TraesCS1B02G162200	TraesCS1B03G0472900		GO:0005515	protein binding	Interacting selectively and non-covalently with any protein or protein complex (a complex of two or more proteins that may include other nonprotein molecules).		F
EnsemblPlants Rel 51	TraesCS1B02G162500	TraesCS1B03G0473200		GO:0016788	hydrolase activity, acting on ester bonds	Catalysis of the hydrolysis of any ester bond.		F
EnsemblPlants Rel 51	TraesCS1B02G163000	TraesCS1B03G0478300		GO:0016021	integral component of membrane	The component of a membrane consisting of the gene products and protein complexes having at least some part of their peptide sequence embedded in the hydrophobic region of the membrane.		C
EnsemblPlants Rel 51	TraesCS1B02G163400	TraesCS1B03G0480300		GO:0005524	ATP binding	Interacting selectively and non-covalently with ATP, adenosine 5'-triphosphate, a universally important coenzyme and enzyme regulator.		F
EnsemblPlants Rel 51	TraesCS1B02G164300	TraesCS1B03G0482300		GO:0005515	protein binding	Interacting selectively and non-covalently with any protein or protein complex (a complex of two or more proteins that may include other nonprotein molecules).		F
EnsemblPlants Rel 51	TraesCS1B02G164800	TraesCS1B03G0483500		GO:0046872	metal ion binding	Interacting selectively and non-covalently with any metal ion.		F
EnsemblPlants Rel 51	TraesCS1B02G165100	TraesCS1B03G0484000		GO:0005515	protein binding	Interacting selectively and non-covalently with any protein or protein complex (a complex of two or more proteins that may include other nonprotein molecules).		F
EnsemblPlants Rel 51	TraesCS1B02G165500	TraesCS1B03G0485000		GO:0016301	kinase activity	Catalysis of the transfer of a phosphate group, usually from ATP, to a substrate molecule.		F
EnsemblPlants Rel 51	TraesCS1B02G167800	TraesCS1B03G0494100		GO:0016747	transferase activity, transferring acyl groups other than amino-acyl groups	Catalysis of the transfer of an acyl group, other than amino-acyl, from one compound (donor) to another (acceptor).		F
EnsemblPlants Rel 51	TraesCS1B02G168800	TraesCS1B03G0497300		GO:0005515	protein binding	Interacting selectively and non-covalently with any protein or protein complex (a complex of two or more proteins that may include other nonprotein molecules).		F
EnsemblPlants Rel 51	TraesCS1B02G169400	TraesCS1B03G0499000		GO:0005515	protein binding	Interacting selectively and non-covalently with any protein or protein complex (a complex of two or more proteins that may include other nonprotein molecules).		F
EnsemblPlants Rel 51	TraesCS1B02G169700	TraesCS1B03G0500400		GO:0043531	ADP binding	Interacting selectively and non-covalently with ADP, adenosine 5'-diphosphate.		F
EnsemblPlants Rel 51	TraesCS1B02G171000	TraesCS1B03G0503600		GO:0005515	protein binding	Interacting selectively and non-covalently with any protein or protein complex (a complex of two or more proteins that may include other nonprotein molecules).		F
EnsemblPlants Rel 51	TraesCS1B02G171100	TraesCS1B03G0504700		GO:0005515	protein binding	Interacting selectively and non-covalently with any protein or protein complex (a complex of two or more proteins that may include other nonprotein molecules).		F
EnsemblPlants Rel 51	TraesCS1B02G171194	TraesCS1B03G0505600		GO:0005515	protein binding	Interacting selectively and non-covalently with any protein or protein complex (a complex of two or more proteins that may include other nonprotein molecules).		F
EnsemblPlants Rel 51	TraesCS1B02G171200	TraesCS1B03G0505700		GO:0005509	calcium ion binding	Interacting selectively and non-covalently with calcium ions (Ca2+).		F
EnsemblPlants Rel 51	TraesCS1B02G171400	TraesCS1B03G0505900	Vacuolar protein sorting-associated protein 2 homolog 3 [Source:Projected from Arabidopsis thaliana (AT1G03950) UniProtKB/Swiss-Prot;Acc:Q941D5]	GO:0007034	vacuolar transport	The directed movement of substances into, out of or within a vacuole.		P
EnsemblPlants Rel 51	TraesCS1B02G171700	TraesCS1B03G0506400		GO:0005515	protein binding	Interacting selectively and non-covalently with any protein or protein complex (a complex of two or more proteins that may include other nonprotein molecules).		F
EnsemblPlants Rel 51	TraesCS1B02G172200	TraesCS1B03G0508500		GO:0005515	protein binding	Interacting selectively and non-covalently with any protein or protein complex (a complex of two or more proteins that may include other nonprotein molecules).		F
EnsemblPlants Rel 51	TraesCS1B02G172500	TraesCS1B03G0509200		GO:0003677	DNA binding	Any molecular function by which a gene product interacts selectively and non-covalently with DNA (deoxyribonucleic acid).		F
EnsemblPlants Rel 51	TraesCS1B02G172600	TraesCS1B03G0509300		GO:0008270	zinc ion binding	Interacting selectively and non-covalently with zinc (Zn) ions.		F
EnsemblPlants Rel 51	TraesCS1B02G173100	TraesCS1B03G0512000		GO:0005515	protein binding	Interacting selectively and non-covalently with any protein or protein complex (a complex of two or more proteins that may include other nonprotein molecules).		F
EnsemblPlants Rel 51	TraesCS1B02G173400	TraesCS1B03G0512500		GO:0016021	integral component of membrane	The component of a membrane consisting of the gene products and protein complexes having at least some part of their peptide sequence embedded in the hydrophobic region of the membrane.		C
EnsemblPlants Rel 51	TraesCS1B02G173600	TraesCS1B03G0513500		GO:0008289	lipid binding	Interacting selectively and non-covalently with a lipid.		F
EnsemblPlants Rel 51	TraesCS1B02G173800	TraesCS1B03G0515200		GO:0003677	DNA binding	Any molecular function by which a gene product interacts selectively and non-covalently with DNA (deoxyribonucleic acid).		F
EnsemblPlants Rel 51	TraesCS1B02G174300	TraesCS1B03G0516400		GO:0009536	plastid	Any member of a family of organelles found in the cytoplasm of plants and some protists, which are membrane-bounded and contain DNA. Plant plastids develop from a common type, the proplastid.		C
EnsemblPlants Rel 51	TraesCS1B02G174400	TraesCS1B03G0516500		GO:0008270	zinc ion binding	Interacting selectively and non-covalently with zinc (Zn) ions.		F
EnsemblPlants Rel 51	TraesCS1B02G174600	TraesCS1B03G0517700		GO:0016021	integral component of membrane	The component of a membrane consisting of the gene products and protein complexes having at least some part of their peptide sequence embedded in the hydrophobic region of the membrane.		C
EnsemblPlants Rel 51	TraesCS1B02G176100	TraesCS1B03G0521700	Pre-mRNA-processing protein 40C [Source:Projected from Arabidopsis thaliana (AT3G19840) UniProtKB/Swiss-Prot;Acc:Q9LT25]	GO:0005515	protein binding	Interacting selectively and non-covalently with any protein or protein complex (a complex of two or more proteins that may include other nonprotein molecules).		F
EnsemblPlants Rel 51	TraesCS1B02G176200	TraesCS1B03G0521800		GO:0005515	protein binding	Interacting selectively and non-covalently with any protein or protein complex (a complex of two or more proteins that may include other nonprotein molecules).		F
EnsemblPlants Rel 51	TraesCS1B02G176600	TraesCS1B03G0522400		GO:0005515	protein binding	Interacting selectively and non-covalently with any protein or protein complex (a complex of two or more proteins that may include other nonprotein molecules).		F
EnsemblPlants Rel 51	TraesCS1B02G176700	TraesCS1B03G0522500		GO:0016021	integral component of membrane	The component of a membrane consisting of the gene products and protein complexes having at least some part of their peptide sequence embedded in the hydrophobic region of the membrane.		C
EnsemblPlants Rel 51	TraesCS1B02G176800	TraesCS1B03G0523200		GO:0005515	protein binding	Interacting selectively and non-covalently with any protein or protein complex (a complex of two or more proteins that may include other nonprotein molecules).		F
EnsemblPlants Rel 51	TraesCS1B02G177700	TraesCS1B03G0528900		GO:0005515	protein binding	Interacting selectively and non-covalently with any protein or protein complex (a complex of two or more proteins that may include other nonprotein molecules).		F
EnsemblPlants Rel 51	TraesCS1B02G178100	TraesCS1B03G0529500		GO:0003723	RNA binding	Interacting selectively and non-covalently with an RNA molecule or a portion thereof.		F
EnsemblPlants Rel 51	TraesCS1B02G178600	TraesCS1B03G0531300		GO:0016021	integral component of membrane	The component of a membrane consisting of the gene products and protein complexes having at least some part of their peptide sequence embedded in the hydrophobic region of the membrane.		C
EnsemblPlants Rel 51	TraesCS1B02G178900	TraesCS1B03G0532800		GO:0016301	kinase activity	Catalysis of the transfer of a phosphate group, usually from ATP, to a substrate molecule.		F
EnsemblPlants Rel 51	TraesCS1B02G179000	TraesCS1B03G0533000		GO:0061630	ubiquitin protein ligase activity	Catalysis of the transfer of ubiquitin to a substrate protein via the reaction X-ubiquitin + S -> X + S-ubiquitin, where X is either an E2 or E3 enzyme, the X-ubiquitin linkage is a thioester bond, and the S-ubiquitin linkage is an amide bond: an isopeptide bond between the C-terminal glycine of ubiquitin and the epsilon-amino group of lysine residues in the substrate or, in the linear extension …		F
EnsemblPlants Rel 51	TraesCS1B02G179709	TraesCS1B03G0534700		GO:0005515	protein binding	Interacting selectively and non-covalently with any protein or protein complex (a complex of two or more proteins that may include other nonprotein molecules).		F
EnsemblPlants Rel 51	TraesCS1B02G180100	TraesCS1B03G0535600		GO:0005515	protein binding	Interacting selectively and non-covalently with any protein or protein complex (a complex of two or more proteins that may include other nonprotein molecules).		F
EnsemblPlants Rel 51	TraesCS1B02G180400	TraesCS1B03G0536200		GO:0005515	protein binding	Interacting selectively and non-covalently with any protein or protein complex (a complex of two or more proteins that may include other nonprotein molecules).		F
EnsemblPlants Rel 51	TraesCS1B02G180500	TraesCS1B03G0536500		GO:0005515	protein binding	Interacting selectively and non-covalently with any protein or protein complex (a complex of two or more proteins that may include other nonprotein molecules).		F
EnsemblPlants Rel 51	TraesCS1B02G180600	TraesCS1B03G0536600		GO:0005515	protein binding	Interacting selectively and non-covalently with any protein or protein complex (a complex of two or more proteins that may include other nonprotein molecules).		F
EnsemblPlants Rel 51	TraesCS1B02G180900	TraesCS1B03G0536900		GO:0005515	protein binding	Interacting selectively and non-covalently with any protein or protein complex (a complex of two or more proteins that may include other nonprotein molecules).		F
EnsemblPlants Rel 51	TraesCS1B02G182100	TraesCS1B03G0540500		GO:0016787	hydrolase activity	Catalysis of the hydrolysis of various bonds, e.g. C-O, C-N, C-C, phosphoric anhydride bonds, etc. Hydrolase is the systematic name for any enzyme of EC class 3.		F
EnsemblPlants Rel 51	TraesCS1B02G182400	TraesCS1B03G0541100		GO:0009507	chloroplast	A chlorophyll-containing plastid with thylakoids organized into grana and frets, or stroma thylakoids, and embedded in a stroma.		C
EnsemblPlants Rel 51	TraesCS1B02G182600	TraesCS1B03G0541400		GO:0003676	nucleic acid binding	Interacting selectively and non-covalently with any nucleic acid.		F
EnsemblPlants Rel 51	TraesCS1B02G183000	TraesCS1B03G0542000		GO:0043531	ADP binding	Interacting selectively and non-covalently with ADP, adenosine 5'-diphosphate.		F
EnsemblPlants Rel 51	TraesCS1B02G183500	TraesCS1B03G0543400		GO:0016021	integral component of membrane	The component of a membrane consisting of the gene products and protein complexes having at least some part of their peptide sequence embedded in the hydrophobic region of the membrane.		C
EnsemblPlants Rel 51	TraesCS1B02G183600	TraesCS1B03G0544000		GO:0016021	integral component of membrane	The component of a membrane consisting of the gene products and protein complexes having at least some part of their peptide sequence embedded in the hydrophobic region of the membrane.		C
EnsemblPlants Rel 51	TraesCS1B02G184400	TraesCS1B03G0545600		GO:0005515	protein binding	Interacting selectively and non-covalently with any protein or protein complex (a complex of two or more proteins that may include other nonprotein molecules).		F
EnsemblPlants Rel 51	TraesCS1B02G185300	TraesCS1B03G0547400		GO:0009638	phototropism	The movement of an organism, or part of an organism, in response to a light stimulus, usually toward or away from it.		P
EnsemblPlants Rel 51	TraesCS1B02G185600	TraesCS1B03G0547800		GO:0016021	integral component of membrane	The component of a membrane consisting of the gene products and protein complexes having at least some part of their peptide sequence embedded in the hydrophobic region of the membrane.		C
EnsemblPlants Rel 51	TraesCS1B02G186600	TraesCS1B03G0549500		GO:0003824	catalytic activity	Catalysis of a biochemical reaction at physiological temperatures. In biologically catalyzed reactions, the reactants are known as substrates, and the catalysts are naturally occurring macromolecular substances known as enzymes. Enzymes possess specific binding sites for substrates, and are usually composed wholly or largely of protein, but RNA that has catalytic activity (ribozyme) is often also…		F
EnsemblPlants Rel 51	TraesCS1B02G186700	TraesCS1B03G0549700		GO:0003824	catalytic activity	Catalysis of a biochemical reaction at physiological temperatures. In biologically catalyzed reactions, the reactants are known as substrates, and the catalysts are naturally occurring macromolecular substances known as enzymes. Enzymes possess specific binding sites for substrates, and are usually composed wholly or largely of protein, but RNA that has catalytic activity (ribozyme) is often also…		F
EnsemblPlants Rel 51	TraesCS1B02G187400	TraesCS1B03G0551400		GO:0047429	nucleoside-triphosphate diphosphatase activity	Catalysis of the reaction: H2O + a nucleoside triphosphate = diphosphate + a nucleotide.		F
EnsemblPlants Rel 51	TraesCS1B02G187700	TraesCS1B03G0552100		GO:0008080	N-acetyltransferase activity	Catalysis of the transfer of an acetyl group to a nitrogen atom on the acceptor molecule.		F
EnsemblPlants Rel 51	TraesCS1B02G187900	TraesCS1B03G0552300		GO:0003676	nucleic acid binding	Interacting selectively and non-covalently with any nucleic acid.		F
EnsemblPlants Rel 51	TraesCS1B02G188100	TraesCS1B03G0552600		GO:0005515	protein binding	Interacting selectively and non-covalently with any protein or protein complex (a complex of two or more proteins that may include other nonprotein molecules).		F
EnsemblPlants Rel 51	TraesCS1B02G188200	TraesCS1B03G0552700		GO:0005515	protein binding	Interacting selectively and non-covalently with any protein or protein complex (a complex of two or more proteins that may include other nonprotein molecules).		F
EnsemblPlants Rel 51	TraesCS1B02G188600	TraesCS1B03G0554500		GO:0006869	lipid transport	The directed movement of lipids into, out of or within a cell, or between cells, by means of some agent such as a transporter or pore. Lipids are compounds soluble in an organic solvent but not, or sparingly, in an aqueous solvent.		P
EnsemblPlants Rel 51	TraesCS1B02G189400	TraesCS1B03G0559500		GO:0006869	lipid transport	The directed movement of lipids into, out of or within a cell, or between cells, by means of some agent such as a transporter or pore. Lipids are compounds soluble in an organic solvent but not, or sparingly, in an aqueous solvent.		P
EnsemblPlants Rel 51	TraesCS1B02G189600	TraesCS1B03G0559900		GO:0006869	lipid transport	The directed movement of lipids into, out of or within a cell, or between cells, by means of some agent such as a transporter or pore. Lipids are compounds soluble in an organic solvent but not, or sparingly, in an aqueous solvent.		P
EnsemblPlants Rel 51	TraesCS1B02G190000	TraesCS1B03G0561000		GO:0016021	integral component of membrane	The component of a membrane consisting of the gene products and protein complexes having at least some part of their peptide sequence embedded in the hydrophobic region of the membrane.		C
EnsemblPlants Rel 51	TraesCS1B02G190600	TraesCS1B03G0562000		GO:0016747	transferase activity, transferring acyl groups other than amino-acyl groups	Catalysis of the transfer of an acyl group, other than amino-acyl, from one compound (donor) to another (acceptor).		F
EnsemblPlants Rel 51	TraesCS1B02G190800	TraesCS1B03G0562500		GO:0046872	metal ion binding	Interacting selectively and non-covalently with any metal ion.		F
EnsemblPlants Rel 51	TraesCS1B02G190900	TraesCS1B03G0563000		GO:0005515	protein binding	Interacting selectively and non-covalently with any protein or protein complex (a complex of two or more proteins that may include other nonprotein molecules).		F
EnsemblPlants Rel 51	TraesCS1B02G191700	TraesCS1B03G0564800		GO:0005515	protein binding	Interacting selectively and non-covalently with any protein or protein complex (a complex of two or more proteins that may include other nonprotein molecules).		F
EnsemblPlants Rel 51	TraesCS1B02G192100	TraesCS1B03G0565300	DAR GTPase 2, mitochondrial [Source:Projected from Arabidopsis thaliana (AT4G10650) UniProtKB/Swiss-Prot;Acc:O82497]	GO:0005525	GTP binding	Interacting selectively and non-covalently with GTP, guanosine triphosphate.		F
EnsemblPlants Rel 51	TraesCS1B02G193300	TraesCS1B03G0569200		GO:0045892	negative regulation of transcription, DNA-templated	Any process that stops, prevents, or reduces the frequency, rate or extent of cellular DNA-templated transcription.		P
EnsemblPlants Rel 51	TraesCS1B02G195400	TraesCS1B03G0575700		GO:0005515	protein binding	Interacting selectively and non-covalently with any protein or protein complex (a complex of two or more proteins that may include other nonprotein molecules).		F
EnsemblPlants Rel 51	TraesCS1B02G196200	TraesCS1B03G0577000		GO:0005515	protein binding	Interacting selectively and non-covalently with any protein or protein complex (a complex of two or more proteins that may include other nonprotein molecules).		F
EnsemblPlants Rel 51	TraesCS1B02G196400	TraesCS1B03G0577400		GO:0005515	protein binding	Interacting selectively and non-covalently with any protein or protein complex (a complex of two or more proteins that may include other nonprotein molecules).		F
EnsemblPlants Rel 51	TraesCS1B02G197700	TraesCS1B03G0581000		GO:0046872	metal ion binding	Interacting selectively and non-covalently with any metal ion.		F
EnsemblPlants Rel 51	TraesCS1B02G198000	TraesCS1B03G0581700		GO:0005515	protein binding	Interacting selectively and non-covalently with any protein or protein complex (a complex of two or more proteins that may include other nonprotein molecules).		F
EnsemblPlants Rel 51	TraesCS1B02G198100	TraesCS1B03G0581900		GO:0005515	protein binding	Interacting selectively and non-covalently with any protein or protein complex (a complex of two or more proteins that may include other nonprotein molecules).		F
EnsemblPlants Rel 51	TraesCS1B02G198800	TraesCS1B03G0582900		GO:0009638	phototropism	The movement of an organism, or part of an organism, in response to a light stimulus, usually toward or away from it.		P
EnsemblPlants Rel 51	TraesCS1B02G199200	TraesCS1B03G0583700		GO:0005515	protein binding	Interacting selectively and non-covalently with any protein or protein complex (a complex of two or more proteins that may include other nonprotein molecules).		F
EnsemblPlants Rel 51	TraesCS1B02G199300	TraesCS1B03G0583900	CB5-E [Source:Projected from Arabidopsis thaliana (AT5G53560) UniProtKB/TrEMBL;Acc:A0A178USU5]	GO:0020037	heme binding	Interacting selectively and non-covalently with heme, any compound of iron complexed in a porphyrin (tetrapyrrole) ring.		F
EnsemblPlants Rel 51	TraesCS1B02G199500	TraesCS1B03G0584400		GO:0005634	nucleus	A membrane-bounded organelle of eukaryotic cells in which chromosomes are housed and replicated. In most cells, the nucleus contains all of the cell's chromosomes except the organellar chromosomes, and is the site of RNA synthesis and processing. In some species, or in specialized cell types, RNA metabolism or DNA replication may be absent.		C
EnsemblPlants Rel 51	TraesCS1B02G200600	TraesCS1B03G0586900		GO:0004857	enzyme inhibitor activity	Binds to and stops, prevents or reduces the activity of an enzyme.		F
EnsemblPlants Rel 51	TraesCS1B02G201100	TraesCS1B03G0587700		GO:0098869	cellular oxidant detoxification	Any process carried out at the cellular level that reduces or removes the toxicity superoxide radicals or hydrogen peroxide.		P
EnsemblPlants Rel 51	TraesCS1B02G201700	TraesCS1B03G0589200		GO:0043531	ADP binding	Interacting selectively and non-covalently with ADP, adenosine 5'-diphosphate.		F
EnsemblPlants Rel 51	TraesCS1B02G201800	TraesCS1B03G0589800		GO:0009733	response to auxin	Any process that results in a change in state or activity of a cell or an organism (in terms of movement, secretion, enzyme production, gene expression, etc.) as a result of an auxin stimulus.		P
EnsemblPlants Rel 51	TraesCS1B02G202500	TraesCS1B03G0591400		GO:0005515	protein binding	Interacting selectively and non-covalently with any protein or protein complex (a complex of two or more proteins that may include other nonprotein molecules).		F
EnsemblPlants Rel 51	TraesCS1B02G203800	TraesCS1B03G0594600	YABBY family transcription factor, Leaf developmen [Source: Projected from Oryza sativa (Os10g0508300)]	GO:0007275	multicellular organism development	The biological process whose specific outcome is the progression of a multicellular organism over time from an initial condition (e.g. a zygote or a young adult) to a later condition (e.g. a multicellular animal or an aged adult).		P
EnsemblPlants Rel 51	TraesCS1B02G204600	TraesCS1B03G0596700		GO:0005515	protein binding	Interacting selectively and non-covalently with any protein or protein complex (a complex of two or more proteins that may include other nonprotein molecules).		F
EnsemblPlants Rel 51	TraesCS1B02G204800	TraesCS1B03G0597200		GO:0005515	protein binding	Interacting selectively and non-covalently with any protein or protein complex (a complex of two or more proteins that may include other nonprotein molecules).		F
EnsemblPlants Rel 51	TraesCS1B02G204900	TraesCS1B03G0597400		GO:0009737	response to abscisic acid	Any process that results in a change in state or activity of a cell or an organism (in terms of movement, secretion, enzyme production, gene expression, etc.) as a result of an abscisic acid stimulus.		P
EnsemblPlants Rel 51	TraesCS1B02G205200	TraesCS1B03G0598100		GO:0016021	integral component of membrane	The component of a membrane consisting of the gene products and protein complexes having at least some part of their peptide sequence embedded in the hydrophobic region of the membrane.		C
EnsemblPlants Rel 51	TraesCS1B02G206000	TraesCS1B03G0601000		GO:0003860	3-hydroxyisobutyryl-CoA hydrolase activity	Catalysis of the reaction: 3-hydroxy-2-methylpropanoyl-CoA + H2O = CoA + 3-hydroxy-2-methylpropanoate.		F
EnsemblPlants Rel 51	TraesCS1B02G206100	TraesCS1B03G0601300		GO:0003680	minor groove of adenine-thymine-rich DNA binding	Interacting selectively and non-covalently with the structure formed by the minor groove of adenine-thymine-rich DNA regions. Examples of proteins having this function are AT-rich interaction domain (ARID)-containing proteins.		F
EnsemblPlants Rel 51	TraesCS1B02G206800	TraesCS1B03G0604100		GO:0016021	integral component of membrane	The component of a membrane consisting of the gene products and protein complexes having at least some part of their peptide sequence embedded in the hydrophobic region of the membrane.		C
EnsemblPlants Rel 51	TraesCS1B02G207300	TraesCS1B03G0605100		GO:0016021	integral component of membrane	The component of a membrane consisting of the gene products and protein complexes having at least some part of their peptide sequence embedded in the hydrophobic region of the membrane.		C
EnsemblPlants Rel 51	TraesCS1B02G207500	TraesCS1B03G0605700		GO:0005515	protein binding	Interacting selectively and non-covalently with any protein or protein complex (a complex of two or more proteins that may include other nonprotein molecules).		F
EnsemblPlants Rel 51	TraesCS1B02G208000	TraesCS1B03G0607400		GO:0046983	protein dimerization activity	The formation of a protein dimer, a macromolecular structure consists of two noncovalently associated identical or nonidentical subunits.		F
EnsemblPlants Rel 51	TraesCS1B02G208700	TraesCS1B03G0610000		GO:0005509	calcium ion binding	Interacting selectively and non-covalently with calcium ions (Ca2+).		F
EnsemblPlants Rel 51	TraesCS1B02G208800	TraesCS1B03G0610100		GO:0016021	integral component of membrane	The component of a membrane consisting of the gene products and protein complexes having at least some part of their peptide sequence embedded in the hydrophobic region of the membrane.		C
EnsemblPlants Rel 51	TraesCS1B02G209200	TraesCS1B03G0610700		GO:0005515	protein binding	Interacting selectively and non-covalently with any protein or protein complex (a complex of two or more proteins that may include other nonprotein molecules).		F
EnsemblPlants Rel 51	TraesCS1B02G209700	TraesCS1B03G0612700		GO:0003824	catalytic activity	Catalysis of a biochemical reaction at physiological temperatures. In biologically catalyzed reactions, the reactants are known as substrates, and the catalysts are naturally occurring macromolecular substances known as enzymes. Enzymes possess specific binding sites for substrates, and are usually composed wholly or largely of protein, but RNA that has catalytic activity (ribozyme) is often also…		F
EnsemblPlants Rel 51	TraesCS1B02G210300	TraesCS1B03G0614800		GO:0003950	NAD+ ADP-ribosyltransferase activity	Catalysis of the reaction: NAD+ + (ADP-D-ribosyl)(n)-acceptor = nicotinamide + (ADP-D-ribosyl)(n+1)-acceptor.		F
EnsemblPlants Rel 51	TraesCS1B02G210800	TraesCS1B03G0616300		GO:0005515	protein binding	Interacting selectively and non-covalently with any protein or protein complex (a complex of two or more proteins that may include other nonprotein molecules).		F
EnsemblPlants Rel 51	TraesCS1B02G211500	TraesCS1B03G0618000		GO:0003677	DNA binding	Any molecular function by which a gene product interacts selectively and non-covalently with DNA (deoxyribonucleic acid).		F
EnsemblPlants Rel 51	TraesCS1B02G213200	TraesCS1B03G0621100		GO:0005515	protein binding	Interacting selectively and non-covalently with any protein or protein complex (a complex of two or more proteins that may include other nonprotein molecules).		F
EnsemblPlants Rel 51	TraesCS1B02G213900	TraesCS1B03G0622300	Patellin-6 [Source:Projected from Arabidopsis thaliana (AT3G51670) UniProtKB/Swiss-Prot;Acc:Q9SCU1]	GO:0005886	plasma membrane	The membrane surrounding a cell that separates the cell from its external environment. It consists of a phospholipid bilayer and associated proteins.		C
EnsemblPlants Rel 51	TraesCS1B02G214700	TraesCS1B03G0625000		GO:0009579	thylakoid	A membranous cellular structure that bears the photosynthetic pigments in plants, algae, and cyanobacteria. In cyanobacteria thylakoids are of various shapes and are attached to, or continuous with, the plasma membrane. In eukaryotes they are flattened, membrane-bounded disk-like structures located in the chloroplasts; in the chloroplasts of higher plants the thylakoids form dense stacks called g…		C
EnsemblPlants Rel 51	TraesCS1B02G215000	TraesCS1B03G0625800		GO:0003677	DNA binding	Any molecular function by which a gene product interacts selectively and non-covalently with DNA (deoxyribonucleic acid).		F
EnsemblPlants Rel 51	TraesCS1B02G215200	TraesCS1B03G0626900		GO:0016021	integral component of membrane	The component of a membrane consisting of the gene products and protein complexes having at least some part of their peptide sequence embedded in the hydrophobic region of the membrane.		C
EnsemblPlants Rel 51	TraesCS1B02G215300	TraesCS1B03G0627000		GO:0004386	helicase activity	Catalysis of the reaction: ATP + H2O = ADP + phosphate, to drive the unwinding of a DNA or RNA helix.		F
EnsemblPlants Rel 51	TraesCS1B02G215500	TraesCS1B03G0627200		GO:0003677	DNA binding	Any molecular function by which a gene product interacts selectively and non-covalently with DNA (deoxyribonucleic acid).		F
EnsemblPlants Rel 51	TraesCS1B02G215600	TraesCS1B03G0627300		GO:0016021	integral component of membrane	The component of a membrane consisting of the gene products and protein complexes having at least some part of their peptide sequence embedded in the hydrophobic region of the membrane.		C
EnsemblPlants Rel 51	TraesCS1B02G216000	TraesCS1B03G0628100		GO:0016021	integral component of membrane	The component of a membrane consisting of the gene products and protein complexes having at least some part of their peptide sequence embedded in the hydrophobic region of the membrane.		C
EnsemblPlants Rel 51	TraesCS1B02G217000	TraesCS1B03G0630700		GO:0005515	protein binding	Interacting selectively and non-covalently with any protein or protein complex (a complex of two or more proteins that may include other nonprotein molecules).		F
EnsemblPlants Rel 51	TraesCS1B02G217200	TraesCS1B03G0631300		GO:0005576	extracellular region	The space external to the outermost structure of a cell. For cells without external protective or external encapsulating structures this refers to space outside of the plasma membrane. This term covers the host cell environment outside an intracellular parasite.		C
EnsemblPlants Rel 51	TraesCS1B02G217800	TraesCS1B03G0633600		GO:0005515	protein binding	Interacting selectively and non-covalently with any protein or protein complex (a complex of two or more proteins that may include other nonprotein molecules).		F
EnsemblPlants Rel 51	TraesCS1B02G218100	TraesCS1B03G0634400		GO:0005515	protein binding	Interacting selectively and non-covalently with any protein or protein complex (a complex of two or more proteins that may include other nonprotein molecules).		F
EnsemblPlants Rel 51	TraesCS1B02G218200	TraesCS1B03G0634500		GO:0005515	protein binding	Interacting selectively and non-covalently with any protein or protein complex (a complex of two or more proteins that may include other nonprotein molecules).		F
EnsemblPlants Rel 51	TraesCS1B02G218600	TraesCS1B03G0635000		GO:0005515	protein binding	Interacting selectively and non-covalently with any protein or protein complex (a complex of two or more proteins that may include other nonprotein molecules).		F
EnsemblPlants Rel 51	TraesCS1B02G218700	TraesCS1B03G0635100		GO:0016021	integral component of membrane	The component of a membrane consisting of the gene products and protein complexes having at least some part of their peptide sequence embedded in the hydrophobic region of the membrane.		C
EnsemblPlants Rel 51	TraesCS1B02G219000	TraesCS1B03G0635400		GO:0016021	integral component of membrane	The component of a membrane consisting of the gene products and protein complexes having at least some part of their peptide sequence embedded in the hydrophobic region of the membrane.		C
EnsemblPlants Rel 51	TraesCS1B02G220800	TraesCS1B03G0637900		GO:0016021	integral component of membrane	The component of a membrane consisting of the gene products and protein complexes having at least some part of their peptide sequence embedded in the hydrophobic region of the membrane.		C
EnsemblPlants Rel 51	TraesCS1B02G221000	TraesCS1B03G0638500		GO:0016021	integral component of membrane	The component of a membrane consisting of the gene products and protein complexes having at least some part of their peptide sequence embedded in the hydrophobic region of the membrane.		C
EnsemblPlants Rel 51	TraesCS1B02G221200	TraesCS1B03G0639300		GO:0055114	oxidation-reduction process	A metabolic process that results in the removal or addition of one or more electrons to or from a substance, with or without the concomitant removal or addition of a proton or protons.		P
EnsemblPlants Rel 51	TraesCS1B02G221300	TraesCS1B03G0639400		GO:0016021	integral component of membrane	The component of a membrane consisting of the gene products and protein complexes having at least some part of their peptide sequence embedded in the hydrophobic region of the membrane.		C
EnsemblPlants Rel 51	TraesCS1B02G222700	TraesCS1B03G0643000		GO:0005089	Rho guanyl-nucleotide exchange factor activity	Stimulates the exchange of guanyl nucleotides associated with a GTPase of the Rho family. Under normal cellular physiological conditions, the concentration of GTP is higher than that of GDP, favoring the replacement of GDP by GTP in association with the GTPase.		F
EnsemblPlants Rel 51	TraesCS1B02G223500	TraesCS1B03G0645100		GO:1900034	regulation of cellular response to heat	Any process that modulates the frequency, rate or extent of cellular response to heat.		P
EnsemblPlants Rel 51	TraesCS1B02G224800	TraesCS1B03G0649200		GO:0008289	lipid binding	Interacting selectively and non-covalently with a lipid.		F
EnsemblPlants Rel 51	TraesCS1B02G225300	TraesCS1B03G0650500		GO:0016021	integral component of membrane	The component of a membrane consisting of the gene products and protein complexes having at least some part of their peptide sequence embedded in the hydrophobic region of the membrane.		C
EnsemblPlants Rel 51	TraesCS1B02G225500	TraesCS1B03G0650700		GO:0003676	nucleic acid binding	Interacting selectively and non-covalently with any nucleic acid.		F
EnsemblPlants Rel 51	TraesCS1B02G226200	TraesCS1B03G0652600		GO:0046983	protein dimerization activity	The formation of a protein dimer, a macromolecular structure consists of two noncovalently associated identical or nonidentical subunits.		F
EnsemblPlants Rel 51	TraesCS1B02G226600	TraesCS1B03G0654200		GO:0032981	mitochondrial respiratory chain complex I assembly	The aggregation, arrangement and bonding together of a set of components to form mitochondrial respiratory chain complex I.		P
[truncated: 235,937+ more rows]
